# Supplementary material
Source: PubMed Central journal article supplement (PMC6226358)
Supplement: NIHMS965635-supplement-Supp_info.pdf [file NIHMS965635-supplement-Supp_info.pdf]

## Supplementary Figure 1. An Illustrative example of Gradient Boosting Machines (GBM)

GBM builds the model in a step-wise fashion combining information from multiple decision trees.

**Step 1.** Fit the first decision tree using all the variables to predict the study endpoint. The tree is built using the following process: utilizing all the subjects (e.g., full cohort, as shown below), identify a single variable and split point. For example, for the first tree, total bilirubin did the best job at separating the group into those with a lower and higher risk of the study endpoint event (see below). Then among those with total bilirubin  $< X_1$ , the best variable that split that subset of subjects was sodium, whereas among those with higher bilirubin ( $\geq X_1$ ), PSC duration did the best job at separating subjects into lower and higher risk (see below).

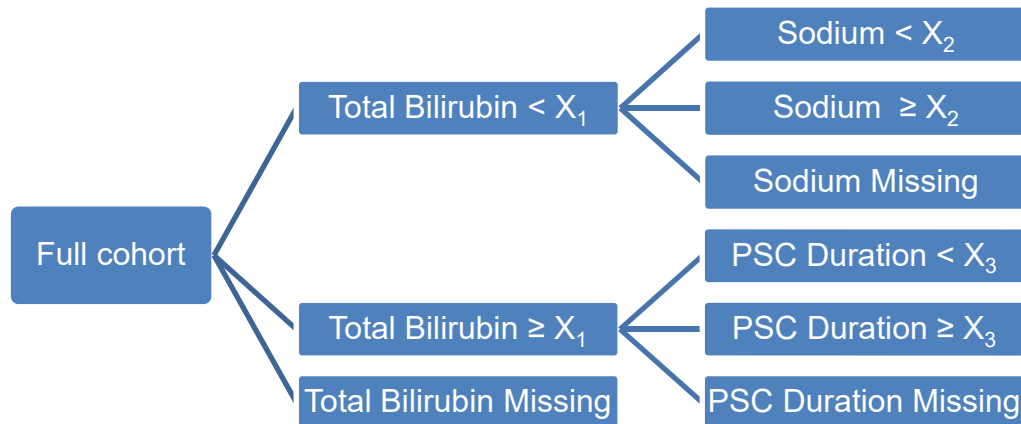

**Step 2.** Fit a second decision tree using the residuals from Step 1 – essentially identify where this initial fit did not do a good job fitting the study outcome. Note that the split points are determined separately at each step, so the split point for Sodium in the first tree ( $X_2$ ) – see above- is different from the split point for Sodium in the second tree ( $X_4$ ) – see below.

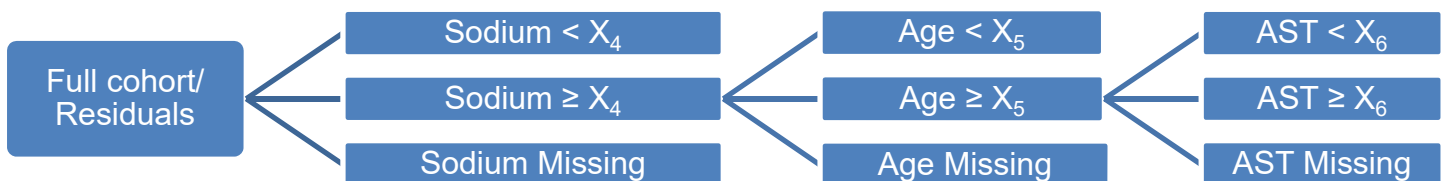

**Step 3.** Fit the third Decision Tree using the residuals from the Step 2. Repeat this process hundreds or thousands of times. For example, in developing PREsTo 2,500 decision trees were employed.

**Step 4.** Combine results from all of these decision trees to get the final model. Supplemental Table 1 includes information on all 2,500 decision trees created for this study.

| var1           | op1 | cut1    | var2                | op2 | cut2                    | var3          | op3 | cut3    | y            | tree |
|----------------|-----|---------|---------------------|-----|-------------------------|---------------|-----|---------|--------------|------|
| TBILL.resultn  | =   | Missing |                     |     |                         |               |     |         | 0.000491155  | 1    |
| TBILL.resultn  | <   |         | 2.65 Sodium.resultn | =   | Missing                 |               |     |         |              | 0    |
| TBILL.resultn  | <   |         | 2.65 Sodium.resultn | <   | 136.5                   |               |     |         | 0.004809189  | 1    |
| TBILL.resultn  | <   |         | 2.65 Sodium.resultn | >=  | 136.5                   |               |     |         | 0.000369014  | 1    |
| TBILL.resultn  | >=  |         | 2.65 psc.yrs.dur    | =   | Missing                 |               |     |         | 0.007416516  | 1    |
| TBILL.resultn  | >=  |         | 2.65 psc.yrs.dur    | <   | 0.639288159             |               |     |         | 0.001120516  | 1    |
| TBILL.resultn  | >=  |         | 2.65 psc.yrs.dur    | >=  | 0.639288159             |               |     |         | 0.012663182  | 1    |
| Sodium.resultn | =   | Missing |                     |     |                         |               |     | Missing | -0.009260498 | 2    |
| Sodium.resultn | <   |         | 136.5               |     |                         |               |     | Missing | -0.005221909 | 2    |
| Sodium.resultn | >=  |         | 136.5 age.yrs       | =   | Missing                 |               |     | Missing | -0.007934247 | 2    |
| Sodium.resultn | >=  |         | 136.5 age.yrs       | <   | 53.46338125             |               |     | Missing | -0.009099914 | 2    |
| Sodium.resultn | >=  |         | 136.5 age.yrs       | >=  | 53.46338125 AST.resultn |               | =   | Missing | -0.004958727 | 2    |
| Sodium.resultn | >=  |         | 136.5 age.yrs       | >=  | 53.46338125 AST.resultn |               | <   | 51.5    | -0.009395484 | 2    |
| Sodium.resultn | >=  |         | 136.5 age.yrs       | >=  | 53.46338125 AST.resultn |               | >=  | 51.5    | 0            | 2    |
| TBILL.resultn  | =   | Missing |                     |     |                         |               |     | Missing | 0.00050551   | 3    |
| TBILL.resultn  | <   |         | 2.05                |     |                         |               |     | Missing | 0.000648917  | 3    |
| TBILL.resultn  | >=  |         | 2.05 PLT.resultn    | =   | Missing                 |               |     | Missing | 0.006033218  | 3    |
| TBILL.resultn  | >=  |         | 2.05 PLT.resultn    | <   | 209                     |               |     | Missing | 0.016800763  | 3    |
| TBILL.resultn  | >=  |         | 2.05 PLT.resultn    | >=  | 209 Hemoglobin.resultn  |               | =   | Missing | 0.001138879  | 3    |
| TBILL.resultn  | >=  |         | 2.05 PLT.resultn    | >=  | 209 Hemoglobin.resultn  |               | <   | 13      | 0.002391646  | 3    |
| TBILL.resultn  | >=  |         | 2.05 PLT.resultn    | >=  | 209 Hemoglobin.resultn  |               | >=  | 13      | 0            | 3    |
| TBILL.resultn  | =   | Missing |                     |     |                         |               |     |         | 1.71E-07     | 4    |
| TBILL.resultn  | <   |         | 2.05 Sodium.resultn | =   | Missing                 |               |     |         | 0            | 4    |
| TBILL.resultn  | <   |         | 2.05 Sodium.resultn | <   | 136.5                   |               |     |         | 0.00271024   | 4    |
| TBILL.resultn  | <   |         | 2.05 Sodium.resultn | >=  | 136.5                   |               |     |         | 0.000683044  | 4    |
| TBILL.resultn  | >=  |         | 2.05 psc.yrs.dur    | =   | Missing                 |               |     |         | 0.007121958  | 4    |
| TBILL.resultn  | >=  |         | 2.05 psc.yrs.dur    | <   | 0.454483231             |               |     |         | 0.002748138  | 4    |
| TBILL.resultn  | >=  |         | 2.05 psc.yrs.dur    | >=  | 0.454483231             |               |     |         | 0.011495779  | 4    |
| TBILL.resultn  | =   | Missing |                     |     |                         |               |     |         | -2.28E-05    | 5    |
| TBILL.resultn  | <   |         | 2.05 ALK.times.uln  | =   | Missing                 |               |     |         | 0            | 5    |
| TBILL.resultn  | <   |         | 2.05 ALK.times.uln  | <   | 6.012755102             |               |     |         | -0.000239284 | 5    |
| TBILL.resultn  | <   |         | 2.05 ALK.times.uln  | >=  | 6.012755102             |               |     |         | 0.004989797  | 5    |
| TBILL.resultn  | >=  |         | 2.05 psc.yrs.dur    | =   | Missing                 |               |     |         | 0.004981098  | 5    |
| TBILL.resultn  | >=  |         | 2.05 psc.yrs.dur    | <   | 0.454483231             |               |     |         | 0.000269585  | 5    |
| TBILL.resultn  | >=  |         | 2.05 psc.yrs.dur    | >=  | 0.454483231             |               |     |         | 0.008436207  | 5    |
| TBILL.resultn  | =   | Missing |                     |     |                         |               |     |         | 0.001393173  | 6    |
| TBILL.resultn  | <   |         | 2.05 Sodium.resultn | =   | Missing                 |               |     |         | 0            | 6    |
| TBILL.resultn  | <   |         | 2.05 Sodium.resultn | <   | 136.5                   |               |     |         | 0.004488759  | 6    |
| TBILL.resultn  | <   |         | 2.05 Sodium.resultn | >=  | 136.5                   |               |     |         | 0.000325534  | 6    |
| TBILL.resultn  | >=  |         | 2.05 psc.yrs.dur    | =   | Missing                 |               |     |         | 0.005793966  | 6    |
| TBILL.resultn  | >=  |         | 2.05 psc.yrs.dur    | <   | 0.454483231             |               |     |         | 0.00146426   | 6    |
| TBILL.resultn  | >=  |         | 2.05 psc.yrs.dur    | >=  | 0.454483231             |               |     |         | 0.009762862  | 6    |
| TBILL.resultn  | =   | Missing |                     |     |                         |               |     |         | 0.001652137  | 7    |
| TBILL.resultn  | <   |         | 1.95 Sodium.resultn | =   | Missing                 |               |     |         | 0            | 7    |
| TBILL.resultn  | <   |         | 1.95 Sodium.resultn | <   | 136.5                   |               |     |         | 0.002448981  | 7    |
| TBILL.resultn  | <   |         | 1.95 Sodium.resultn | >=  | 136.5                   |               |     |         | 0.000483132  | 7    |
| TBILL.resultn  | >=  |         | 1.95 ALB.resultn    | =   | Missing                 |               |     |         | 0.008297578  | 7    |
| TBILL.resultn  | >=  |         | 1.95 ALB.resultn    | <   | 3.35                    |               |     |         | 0.017014402  | 7    |
| TBILL.resultn  | >=  |         | 1.95 ALB.resultn    | >=  | 3.35                    |               |     |         | 0.002486362  | 7    |
| TBILL.resultn  | =   | Missing |                     |     |                         |               |     | Missing | -0.003189465 | 8    |
| TBILL.resultn  | <   |         | 2.75 ALK.times.uln  | =   | Missing                 | TBILL.resultn | =   | Missing | -0.002682608 | 8    |
| TBILL.resultn  | <   |         | 2.75 ALK.times.uln  | =   | Missing                 | TBILL.resultn | <   | 0.75    | -0.003894109 | 8    |
| TBILL.resultn  | <   |         | 2.75 ALK.times.uln  | =   | Missing                 | TBILL.resultn | >=  | 0.75    | 0            | 8    |
| TBILL.resultn  | <   |         | 2.75 ALK.times.uln  | <   | 6.02                    |               |     | Missing | -0.003600833 | 8    |
| TBILL.resultn  | <   |         | 2.75 ALK.times.uln  | >=  | 6.02                    |               |     | Missing | 0.000238527  | 8    |
| TBILL.resultn  | >=  |         | 2.75                |     |                         |               |     | Missing | 0.002745873  | 8    |
| TBILL.resultn  | =   | Missing |                     |     |                         |               |     |         | -0.001607438 | 9    |
| TBILL.resultn  | <   |         | 2.05 psc.yrs.dur    | =   | Missing                 |               |     |         | -0.002009787 | 9    |
| TBILL.resultn  | <   |         | 2.05 psc.yrs.dur    | <   | 4.963723477             |               |     |         | -0.002333586 | 9    |
| TBILL.resultn  | <   |         | 2.05 psc.yrs.dur    | >=  | 4.963723477             |               |     |         | 0            | 9    |
| TBILL.resultn  | >=  |         | 2.05 ALB.resultn    | =   | Missing                 |               |     |         | 0.005089242  | 9    |

|               |    |         |                |    |             |             |         |              |              |    |    |
|---------------|----|---------|----------------|----|-------------|-------------|---------|--------------|--------------|----|----|
| TBILI.resultn | >= | 2.05    | ALB.resultn    | <  | 3.35        |             |         | 0.013318291  | 9            |    |    |
| TBILI.resultn | >= | 2.05    | ALB.resultn    | >= | 3.35        |             |         | -5.39E-05    | 9            |    |    |
| ALB.resultn   | =  | Missing |                |    |             |             | Missing | 0.000461582  | 10           |    |    |
| ALB.resultn   | <  | 3.135   |                |    |             |             | Missing | 0.007181433  | 10           |    |    |
| ALB.resultn   | >= | 3.135   | ALK.times.uln  | =  | Missing     | ALB.resultn | =       | Missing      | 0.001331864  | 10 |    |
| ALB.resultn   | >= | 3.135   | ALK.times.uln  | =  | Missing     | ALB.resultn | <       | 3.95         | 0.004507847  | 10 |    |
| ALB.resultn   | >= | 3.135   | ALK.times.uln  | =  | Missing     | ALB.resultn | >=      | 3.95         | 0            | 10 |    |
| ALB.resultn   | >= | 3.135   | ALK.times.uln  | <  | 2.822501299 |             | Missing | 0.0001226    | 10           | 10 |    |
| ALB.resultn   | >= | 3.135   | ALK.times.uln  | >= | 2.822501299 |             | Missing | 0.001682596  | 10           | 10 |    |
| TBILI.resultn | =  | Missing |                |    |             |             |         | -0.001846281 | 11           | 11 |    |
| TBILI.resultn | <  | 2.05    | psc.yrs.dur    | =  | Missing     |             |         | -0.002086157 | 11           | 11 |    |
| TBILI.resultn | <  | 2.05    | psc.yrs.dur    | <  | 6.410677618 |             |         | -0.002409678 | 11           | 11 |    |
| TBILI.resultn | <  | 2.05    | psc.yrs.dur    | >= | 6.410677618 |             |         | 0            | 11           | 11 |    |
| TBILI.resultn | >= | 2.05    | age.yrs        | =  | Missing     |             |         | 0.003612133  | 11           | 11 |    |
| TBILI.resultn | >= | 2.05    | age.yrs        | <  | 43.09787817 |             |         | -0.000667705 | 11           | 11 |    |
| TBILI.resultn | >= | 2.05    | age.yrs        | >= | 43.09787817 |             |         | 0.008248624  | 11           | 11 |    |
| ALB.resultn   | =  | Missing |                |    |             |             |         | -0.00152517  | 12           | 12 |    |
| ALB.resultn   | <  | 3.34    | TBILI.resultn  | =  | Missing     |             |         | 0.009790926  | 12           | 12 |    |
| ALB.resultn   | <  | 3.34    | TBILI.resultn  | <  | 1.31        |             |         | -0.000805818 | 12           | 12 |    |
| ALB.resultn   | <  | 3.34    | TBILI.resultn  | >= | 1.31        |             |         | 0.022017939  | 12           | 12 |    |
| ALB.resultn   | >= | 3.34    | age.yrs        | =  | Missing     |             |         | -0.000993359 | 12           | 12 |    |
| ALB.resultn   | >= | 3.34    | age.yrs        | <  | 53.56741958 |             |         | -0.001386564 | 12           | 12 |    |
| ALB.resultn   | >= | 3.34    | age.yrs        | >= | 53.56741958 |             |         | 0            | 12           | 12 |    |
| ALB.resultn   | =  | Missing |                |    |             |             |         | -0.000902149 | 13           | 13 |    |
| ALB.resultn   | <  | 3.225   | TBILI.resultn  | =  | Missing     |             |         | 0.007342732  | 13           | 13 |    |
| ALB.resultn   | <  | 3.225   | TBILI.resultn  | <  | 1.51        |             |         | 0.001077759  | 13           | 13 |    |
| ALB.resultn   | <  | 3.225   | TBILI.resultn  | >= | 1.51        |             |         | 0.013038162  | 13           | 13 |    |
| ALB.resultn   | >= | 3.225   | TBILI.resultn  | =  | Missing     |             |         | -0.000805829 | 13           | 13 |    |
| ALB.resultn   | >= | 3.225   | TBILI.resultn  | <  | 0.85        |             |         | -0.001367878 | 13           | 13 |    |
| ALB.resultn   | >= | 3.225   | TBILI.resultn  | >= | 0.85        |             |         | 0            | 13           | 13 |    |
| ALB.resultn   | =  | Missing |                |    |             |             | Missing | -0.003815345 | 14           | 14 |    |
| ALB.resultn   | <  | 3.245   |                |    |             |             | Missing | 0.000423614  | 14           | 14 |    |
| ALB.resultn   | >= | 3.245   | TBILI.resultn  | =  | Missing     |             | Missing | -0.0034959   | 14           | 14 |    |
| ALB.resultn   | >= | 3.245   | TBILI.resultn  | <  | 0.75        |             | Missing | -0.004356697 | 14           | 14 |    |
| ALB.resultn   | >= | 3.245   | TBILI.resultn  | >= | 0.75        | age.yrs     | =       | Missing      | -0.002766938 | 14 | 14 |
| ALB.resultn   | >= | 3.245   | TBILI.resultn  | >= | 0.75        | age.yrs     | <       | 53.64681725  | -0.003700363 | 14 | 14 |
| ALB.resultn   | >= | 3.245   | TBILI.resultn  | >= | 0.75        | age.yrs     | >=      | 53.64681725  | 0            | 14 | 14 |
| ALB.resultn   | =  | Missing |                |    |             |             | Missing | -0.000443876 | 15           | 15 |    |
| ALB.resultn   | <  | 3.25    |                |    |             |             | Missing | 0.007813346  | 15           | 15 |    |
| ALB.resultn   | >= | 3.25    | Sodium.resultn | =  | Missing     |             | Missing | -0.000896427 | 15           | 15 |    |
| ALB.resultn   | >= | 3.25    | Sodium.resultn | <  | 137.5       | PLT.resultn | =       | Missing      | 0.002343494  | 15 | 15 |
| ALB.resultn   | >= | 3.25    | Sodium.resultn | <  | 137.5       | PLT.resultn | <       | 284          | 0.005155686  | 15 | 15 |
| ALB.resultn   | >= | 3.25    | Sodium.resultn | <  | 137.5       | PLT.resultn | >=      | 284          | 0            | 15 | 15 |
| ALB.resultn   | >= | 3.25    | Sodium.resultn | >= | 137.5       |             | Missing | -0.000549366 | 15           | 15 | 15 |
| ALB.resultn   | =  | Missing |                |    |             |             |         | -0.001255692 | 16           | 16 |    |
| ALB.resultn   | <  | 3.31    | psc.yrs.dur    | =  | Missing     |             |         | 0.00761081   | 16           | 16 |    |
| ALB.resultn   | <  | 3.31    | psc.yrs.dur    | <  | 0.6954141   |             |         | -0.001281855 | 16           | 16 |    |
| ALB.resultn   | <  | 3.31    | psc.yrs.dur    | >= | 0.6954141   |             |         | 0.014280308  | 16           | 16 |    |
| ALB.resultn   | >= | 3.31    | TBILI.resultn  | =  | Missing     |             |         | -0.000649102 | 16           | 16 |    |
| ALB.resultn   | >= | 3.31    | TBILI.resultn  | <  | 0.75        |             |         | -0.00126607  | 16           | 16 |    |
| ALB.resultn   | >= | 3.31    | TBILI.resultn  | >= | 0.75        |             |         | 0            | 16           | 16 |    |
| TBILI.resultn | =  | Missing |                |    |             |             |         | -0.001299537 | 17           | 17 |    |
| TBILI.resultn | <  | 2.05    | age.yrs        | =  | Missing     |             |         | -0.001380502 | 17           | 17 |    |
| TBILI.resultn | <  | 2.05    | age.yrs        | <  | 56.10403833 |             |         | -0.001748636 | 17           | 17 |    |
| TBILI.resultn | <  | 2.05    | age.yrs        | >= | 56.10403833 |             |         | 0            | 17           | 17 |    |
| TBILI.resultn | >= | 2.05    | ALB.resultn    | =  | Missing     |             |         | 0.004384311  | 17           | 17 |    |
| TBILI.resultn | >= | 2.05    | ALB.resultn    | <  | 3.35        |             |         | 0.01119633   | 17           | 17 |    |
| TBILI.resultn | >= | 2.05    | ALB.resultn    | >= | 3.35        |             |         | -0.00061117  | 17           | 17 |    |
| TBILI.resultn | =  | Missing |                |    |             |             |         | 0.00169501   | 18           | 18 |    |
| TBILI.resultn | <  | 2.25    | Sodium.resultn | =  | Missing     |             |         | 0            | 18           | 18 |    |
| TBILI.resultn | <  | 2.25    | Sodium.resultn | <  | 136.5       |             |         | 0.003192471  | 18           | 18 |    |
| TBILI.resultn | <  | 2.25    | Sodium.resultn | >= | 136.5       |             |         | 0.000287529  | 18           | 18 |    |

|               |    |                           |    |                     |    |             |              |    |
|---------------|----|---------------------------|----|---------------------|----|-------------|--------------|----|
| TBILL.resultn | >= | 2.25 age.yrs              | =  | Missing             |    |             | 0.006608083  | 18 |
| TBILL.resultn | >= | 2.25 age.yrs              | <  | 43.09787817         |    |             | 0.001097525  | 18 |
| TBILL.resultn | >= | 2.25 age.yrs              | >= | 43.09787817         |    |             | 0.011200215  | 18 |
| TBILL.resultn | =  | Missing                   |    |                     |    |             | -0.00098945  | 19 |
| TBILL.resultn | <  | 2.05 age.yrs              | =  | Missing             |    |             | -0.001114415 | 19 |
| TBILL.resultn | <  | 2.05 age.yrs              | <  | 49.22655715         |    |             | -0.001695166 | 19 |
| TBILL.resultn | <  | 2.05 age.yrs              | >= | 49.22655715         |    |             | 0            | 19 |
| TBILL.resultn | >= | 2.05 age.yrs              | =  | Missing             |    |             | 0.006144343  | 19 |
| TBILL.resultn | >= | 2.05 age.yrs              | <  | 51.08008214         |    |             | -0.000243332 | 19 |
| TBILL.resultn | >= | 2.05 age.yrs              | >= | 51.08008214         |    |             | 0.015087089  | 19 |
| TBILL.resultn | =  | Missing                   |    |                     |    | Missing     | -0.00325032  | 20 |
| TBILL.resultn | <  | 2.45 TBILL.resultn        | =  | Missing             |    | Missing     | -0.003289483 | 20 |
| TBILL.resultn | <  | 2.45 TBILL.resultn        | <  | 0.85                |    | Missing     | -0.003938402 | 20 |
| TBILL.resultn | <  | 2.45 TBILL.resultn        | >= | 0.85 age.yrs        | =  | Missing     | -0.002194922 | 20 |
| TBILL.resultn | <  | 2.45 TBILL.resultn        | >= | 0.85 age.yrs        | <  | 49.14852841 | -0.003572129 | 20 |
| TBILL.resultn | <  | 2.45 TBILL.resultn        | >= | 0.85 age.yrs        | >= | 49.14852841 | 0            | 20 |
| TBILL.resultn | >= | 2.45                      |    |                     |    | Missing     | 0.00240955   | 20 |
| ALK.times.uln | =  | Missing TBILL.resultn     | =  | Missing             |    |             | -0.002895087 | 21 |
| ALK.times.uln | =  | Missing TBILL.resultn     | <  | 0.95                |    |             | -0.004737416 | 21 |
| ALK.times.uln | =  | Missing TBILL.resultn     | >= | 0.95                |    |             | 0            | 21 |
| ALK.times.uln | <  | 4.964143426               |    |                     |    |             | -0.004375977 | 21 |
| ALK.times.uln | >= | 4.964143426 PLT.resultn   | =  | Missing             |    |             | 0.000834011  | 21 |
| ALK.times.uln | >= | 4.964143426 PLT.resultn   | <  | 282                 |    |             | 0.004159541  | 21 |
| ALK.times.uln | >= | 4.964143426 PLT.resultn   | >= | 282                 |    |             | -0.002491519 | 21 |
| ALK.times.uln | =  | Missing age.yrs           | =  | Missing             |    |             | -0.000275494 | 22 |
| ALK.times.uln | =  | Missing age.yrs           | <  | 53.46475017         |    |             | -0.00151331  | 22 |
| ALK.times.uln | =  | Missing age.yrs           | >= | 53.46475017         |    |             | 0.002916769  | 22 |
| ALK.times.uln | <  | 5.438574341 TBILL.resultn | =  | Missing             |    |             | -0.00092687  | 22 |
| ALK.times.uln | <  | 5.438574341 TBILL.resultn | <  | 0.85                |    |             | -0.001514193 | 22 |
| ALK.times.uln | <  | 5.438574341 TBILL.resultn | >= | 0.85                |    |             | 0            | 22 |
| ALK.times.uln | >= | 5.438574341               |    |                     |    |             | 0.004165077  | 22 |
| ALB.resultn   | =  | Missing                   |    |                     |    | Missing     | -0.000153145 | 23 |
| ALB.resultn   | <  | 2.915                     |    |                     |    | Missing     | 0.010760062  | 23 |
| ALB.resultn   | >= | 2.915 TBILL.resultn       | =  | Missing             |    | Missing     | 0.000116013  | 23 |
| ALB.resultn   | >= | 2.915 TBILL.resultn       | <  | 2.45 ALK.times.uln  | =  | Missing     | 0            | 23 |
| ALB.resultn   | >= | 2.915 TBILL.resultn       | <  | 2.45 ALK.times.uln  | <  | 4.937537151 | -0.000472157 | 23 |
| ALB.resultn   | >= | 2.915 TBILL.resultn       | <  | 2.45 ALK.times.uln  | >= | 4.937537151 | 0.001762938  | 23 |
| ALB.resultn   | >= | 2.915 TBILL.resultn       | >= | 2.45                |    | Missing     | 0.004007165  | 23 |
| TBILL.resultn | =  | Missing                   |    |                     |    | Missing     | 0.001985035  | 24 |
| TBILL.resultn | <  | 3.5 ALK.times.uln         | =  | Missing ALB.resultn | =  | Missing     | 0.002198654  | 24 |
| TBILL.resultn | <  | 3.5 ALK.times.uln         | =  | Missing ALB.resultn | <  | 3.95        | 0.006595963  | 24 |
| TBILL.resultn | <  | 3.5 ALK.times.uln         | =  | Missing ALB.resultn | >= | 3.95        | 0            | 24 |
| TBILL.resultn | <  | 3.5 ALK.times.uln         | <  | 5.963877551         |    | Missing     | 0.000166079  | 24 |
| TBILL.resultn | <  | 3.5 ALK.times.uln         | >= | 5.963877551         |    | Missing     | 0.002417764  | 24 |
| TBILL.resultn | >= | 3.5                       |    |                     |    | Missing     | 0.006254936  | 24 |
| TBILL.resultn | =  | Missing                   |    |                     |    |             | 0.002863158  | 25 |
| TBILL.resultn | <  | 2.05 Sodium.resultn       | =  | Missing             |    |             | 0            | 25 |
| TBILL.resultn | <  | 2.05 Sodium.resultn       | <  | 136.5               |    |             | 0.00378056   | 25 |
| TBILL.resultn | <  | 2.05 Sodium.resultn       | >= | 136.5               |    |             | 6.61E-05     | 25 |
| TBILL.resultn | >= | 2.05 PLT.resultn          | =  | Missing             |    |             | 0.006855762  | 25 |
| TBILL.resultn | >= | 2.05 PLT.resultn          | <  | 246                 |    |             | 0.012554509  | 25 |
| TBILL.resultn | >= | 2.05 PLT.resultn          | >= | 246                 |    |             | 0.001675082  | 25 |
| ALK.times.uln | =  | Missing TBILL.resultn     | =  | Missing             |    |             | 0.001017662  | 26 |
| ALK.times.uln | =  | Missing TBILL.resultn     | <  | 0.95                |    |             | -0.000271582 | 26 |
| ALK.times.uln | =  | Missing TBILL.resultn     | >= | 0.95                |    |             | 0.003939949  | 26 |
| ALK.times.uln | <  | 6.02173913 Sodium.resultn | =  | Missing             |    |             | 0            | 26 |
| ALK.times.uln | <  | 6.02173913 Sodium.resultn | <  | 137.5               |    |             | 0.002109909  | 26 |
| ALK.times.uln | <  | 6.02173913 Sodium.resultn | >= | 137.5               |    |             | -8.80E-05    | 26 |
| ALK.times.uln | >= | 6.02173913                |    |                     |    |             | 0.007542125  | 26 |
| TBILL.resultn | =  | Missing                   |    |                     |    |             | -0.002370245 | 27 |
| TBILL.resultn | <  | 2.45 age.yrs              | =  | Missing             |    |             | -0.001638712 | 27 |
| TBILL.resultn | <  | 2.45 age.yrs              | <  | 55.77138946         |    |             | -0.002072489 | 27 |

|               |    |                         |    |             |               |         |         |              |    |
|---------------|----|-------------------------|----|-------------|---------------|---------|---------|--------------|----|
| TBILI.resultn | <  | 2.45 age.yrs            | >= | 55.77138946 |               |         |         | 0            | 27 |
| TBILI.resultn | >= | 2.45 ALB.resultn        | =  | Missing     |               |         |         | 0.004120415  | 27 |
| TBILI.resultn | >= | 2.45 ALB.resultn        | <  | 3.35        |               |         |         | 0.011188793  | 27 |
| TBILI.resultn | >= | 2.45 ALB.resultn        | >= | 3.35        |               |         |         | -0.000591837 | 27 |
| ALB.resultn   | =  | Missing                 |    |             |               | Missing |         | -0.004471601 | 28 |
| ALB.resultn   | <  | 3.105                   |    |             |               | Missing |         | 0.003751297  | 28 |
| ALB.resultn   | >= | 3.105 ALK.times.uln     | =  | Missing     | TBILI.resultn | =       | Missing | -0.002927186 | 28 |
| ALB.resultn   | >= | 3.105 ALK.times.uln     | =  | Missing     | TBILI.resultn | <       | 0.95    | -0.004488352 | 28 |
| ALB.resultn   | >= | 3.105 ALK.times.uln     | =  | Missing     | TBILI.resultn | >=      | 0.95    | 0            | 28 |
| ALB.resultn   | >= | 3.105 ALK.times.uln     | <  | 5.438574341 |               | Missing |         | -0.004165722 | 28 |
| ALB.resultn   | >= | 3.105 ALK.times.uln     | >= | 5.438574341 |               | Missing |         | -0.001429954 | 28 |
| TBILI.resultn | =  | Missing                 |    |             |               |         |         | 7.22E-06     | 29 |
| TBILI.resultn | <  | 2.45 Sodium.resultn     | =  | Missing     |               |         |         | 0            | 29 |
| TBILI.resultn | <  | 2.45 Sodium.resultn     | <  | 142.5       |               |         |         | 0.000201692  | 29 |
| TBILI.resultn | <  | 2.45 Sodium.resultn     | >= | 142.5       |               |         |         | 0.003071169  | 29 |
| TBILI.resultn | >= | 2.45 Hemoglobin.resultn | =  | Missing     |               |         |         | 0.010787787  | 29 |
| TBILI.resultn | >= | 2.45 Hemoglobin.resultn | <  | 12.75       |               |         |         | 0.02160145   | 29 |
| TBILI.resultn | >= | 2.45 Hemoglobin.resultn | >= | 12.75       |               |         |         | -2.59E-05    | 29 |
| ALB.resultn   | =  | Missing                 |    |             |               |         |         | -0.000161741 | 30 |
| ALB.resultn   | <  | 3.225 TBILI.resultn     | =  | Missing     |               |         |         | 0.009930933  | 30 |
| ALB.resultn   | <  | 3.225 TBILI.resultn     | <  | 1.85        |               |         |         | 0.003707896  | 30 |
| ALB.resultn   | <  | 3.225 TBILI.resultn     | >= | 1.85        |               |         |         | 0.01615397   | 30 |
| ALB.resultn   | >= | 3.225 Sodium.resultn    | =  | Missing     |               |         |         | 0            | 30 |
| ALB.resultn   | >= | 3.225 Sodium.resultn    | <  | 137.5       |               |         |         | 0.00222327   | 30 |
| ALB.resultn   | >= | 3.225 Sodium.resultn    | >= | 137.5       |               |         |         | 4.20E-05     | 30 |
| ALB.resultn   | =  | Missing                 |    |             |               |         |         | -0.001262187 | 31 |
| ALB.resultn   | <  | 3.225 TBILI.resultn     | =  | Missing     |               |         |         | 0.00450073   | 31 |
| ALB.resultn   | <  | 3.225 TBILI.resultn     | <  | 1.5         |               |         |         | 0.000972772  | 31 |
| ALB.resultn   | <  | 3.225 TBILI.resultn     | >= | 1.5         |               |         |         | 0.008028687  | 31 |
| ALB.resultn   | >= | 3.225 TBILI.resultn     | =  | Missing     |               |         |         | -0.001005861 | 31 |
| ALB.resultn   | >= | 3.225 TBILI.resultn     | <  | 0.85        |               |         |         | -0.001698976 | 31 |
| ALB.resultn   | >= | 3.225 TBILI.resultn     | >= | 0.85        |               |         |         | 0            | 31 |
| TBILI.resultn | =  | Missing                 |    |             |               |         |         | 0.000578261  | 32 |
| TBILI.resultn | <  | 1.95 ALK.times.uln      | =  | Missing     |               |         |         | 0            | 32 |
| TBILI.resultn | <  | 1.95 ALK.times.uln      | <  | 5.781840514 |               |         |         | -0.000419126 | 32 |
| TBILI.resultn | <  | 1.95 ALK.times.uln      | >= | 5.781840514 |               |         |         | 0.007745964  | 32 |
| TBILI.resultn | >= | 1.95 ALK.times.uln      | =  | Missing     |               |         |         | 0.004924108  | 32 |
| TBILI.resultn | >= | 1.95 ALK.times.uln      | <  | 4.683266932 |               |         |         | 0.007230343  | 32 |
| TBILI.resultn | >= | 1.95 ALK.times.uln      | >= | 4.683266932 |               |         |         | 0.003002246  | 32 |
| TBILI.resultn | =  | Missing                 |    |             |               |         |         | 0.000605421  | 33 |
| TBILI.resultn | <  | 1.65 Sodium.resultn     | =  | Missing     |               |         |         | 0            | 33 |
| TBILI.resultn | <  | 1.65 Sodium.resultn     | <  | 137.5       |               |         |         | 0.002338955  | 33 |
| TBILI.resultn | <  | 1.65 Sodium.resultn     | >= | 137.5       |               |         |         | 0.00018075   | 33 |
| TBILI.resultn | >= | 1.65 PLT.resultn        | =  | Missing     |               |         |         | 0.00667982   | 33 |
| TBILI.resultn | >= | 1.65 PLT.resultn        | <  | 200         |               |         |         | 0.020060643  | 33 |
| TBILI.resultn | >= | 1.65 PLT.resultn        | >= | 200         |               |         |         | 0.00153335   | 33 |
| TBILI.resultn | =  | Missing                 |    |             |               |         |         | 0.001658487  | 34 |
| TBILI.resultn | <  | 1.55 Sodium.resultn     | =  | Missing     |               |         |         | 0            | 34 |
| TBILI.resultn | <  | 1.55 Sodium.resultn     | <  | 138.5       |               |         |         | 0.002307545  | 34 |
| TBILI.resultn | <  | 1.55 Sodium.resultn     | >= | 138.5       |               |         |         | 7.23E-05     | 34 |
| TBILI.resultn | >= | 1.55 Hemoglobin.resultn | =  | Missing     |               |         |         | 0.005664748  | 34 |
| TBILI.resultn | >= | 1.55 Hemoglobin.resultn | <  | 13.9        |               |         |         | 0.010734198  | 34 |
| TBILI.resultn | >= | 1.55 Hemoglobin.resultn | >= | 13.9        |               |         |         | -0.000184618 | 34 |
| TBILI.resultn | =  | Missing                 |    |             |               | Missing |         | -0.000787693 | 35 |
| TBILI.resultn | <  | 0.95                    |    |             |               | Missing |         | -0.001710727 | 35 |
| TBILI.resultn | >= | 0.95 ALK.times.uln      | =  | Missing     |               | Missing |         | 0.003114385  | 35 |
| TBILI.resultn | >= | 0.95 ALK.times.uln      | <  | 2.81254114  |               | Missing |         | -0.001939835 | 35 |
| TBILI.resultn | >= | 0.95 ALK.times.uln      | >= | 2.81254114  | PLT.resultn   | =       | Missing | 0.002041264  | 35 |
| TBILI.resultn | >= | 0.95 ALK.times.uln      | >= | 2.81254114  | PLT.resultn   | <       | 252     | 0.006736172  | 35 |
| TBILI.resultn | >= | 0.95 ALK.times.uln      | >= | 2.81254114  | PLT.resultn   | >=      | 252     | 0            | 35 |
| psc.yrs.dur   | =  | Missing                 |    |             |               | Missing |         | -0.005739172 | 36 |
| psc.yrs.dur   | <  | 6.410677618             |    |             |               | Missing |         | -0.006477641 | 36 |

|               |    |             |                |    |             |                |         |              |              |    |
|---------------|----|-------------|----------------|----|-------------|----------------|---------|--------------|--------------|----|
| psc.yrs.dur   | >= | 6.410677618 | AST.resultn    | =  | Missing     |                | Missing | -0.00079367  | 36           |    |
| psc.yrs.dur   | >= | 6.410677618 | AST.resultn    | <  | 85.5        | AST.resultn    | =       | Missing      | -0.00328448  | 36 |
| psc.yrs.dur   | >= | 6.410677618 | AST.resultn    | <  | 85.5        | AST.resultn    | <       | 43           | -0.006867549 | 36 |
| psc.yrs.dur   | >= | 6.410677618 | AST.resultn    | <  | 85.5        | AST.resultn    | >=      | 43           | 0            | 36 |
| psc.yrs.dur   | >= | 6.410677618 | AST.resultn    | >= | 85.5        |                | Missing | 0.004935194  | 36           |    |
| ALB.resultn   | =  | Missing     |                |    |             |                | Missing | -0.001792276 | 37           |    |
| ALB.resultn   | <  | 2.915       |                |    |             |                | Missing | 0.008818566  | 37           |    |
| ALB.resultn   | >= | 2.915       | TBILI.resultn  | =  | Missing     |                | Missing | -0.001395112 | 37           |    |
| ALB.resultn   | >= | 2.915       | TBILI.resultn  | <  | 2.05        | age.yrs        | =       | Missing      | -0.001662862 | 37 |
| ALB.resultn   | >= | 2.915       | TBILI.resultn  | <  | 2.05        | age.yrs        | <       | 60.46132786  | -0.001908847 | 37 |
| ALB.resultn   | >= | 2.915       | TBILI.resultn  | <  | 2.05        | age.yrs        | >=      | 60.46132786  | 0            | 37 |
| ALB.resultn   | >= | 2.915       | TBILI.resultn  | >= | 2.05        |                | Missing | 0.001660377  | 37           |    |
| ALB.resultn   | =  | Missing     |                |    |             |                | Missing | -0.011210275 | 38           |    |
| ALB.resultn   | <  | 2.915       |                |    |             |                | Missing | 0.003465408  | 38           |    |
| ALB.resultn   | >= | 2.915       | PLT.resultn    | =  | Missing     |                | Missing | -0.011242156 | 38           |    |
| ALB.resultn   | >= | 2.915       | PLT.resultn    | <  | 209.5       | ALK.times.uln  | =       | Missing      | -0.007074281 | 38 |
| ALB.resultn   | >= | 2.915       | PLT.resultn    | <  | 209.5       | ALK.times.uln  | <       | 1.633261105  | -0.011235623 | 38 |
| ALB.resultn   | >= | 2.915       | PLT.resultn    | <  | 209.5       | ALK.times.uln  | >=      | 1.633261105  | 0            | 38 |
| ALB.resultn   | >= | 2.915       | PLT.resultn    | >= | 209.5       |                | Missing | -0.010858401 | 38           |    |
| TBILI.resultn | =  | Missing     |                |    |             |                | Missing | -0.009895436 | 39           |    |
| TBILI.resultn | <  | 4.2         | age.yrs        | =  | Missing     |                | Missing | -0.009035757 | 39           |    |
| TBILI.resultn | <  | 4.2         | age.yrs        | >  | 60.46132786 |                | Missing | -0.009632372 | 39           |    |
| TBILI.resultn | <  | 4.2         | age.yrs        | >= | 60.46132786 | AST.resultn    | =       | Missing      | -0.005038438 | 39 |
| TBILI.resultn | <  | 4.2         | age.yrs        | >= | 60.46132786 | AST.resultn    | <       | 57.5         | -0.008594982 | 39 |
| TBILI.resultn | <  | 4.2         | age.yrs        | >= | 60.46132786 | AST.resultn    | >=      | 57.5         | 0            | 39 |
| TBILI.resultn | >= | 4.2         |                |    |             |                | Missing | -0.000737304 | 39           |    |
| ALB.resultn   | =  | Missing     |                |    |             |                | Missing | 0.000535614  | 40           |    |
| ALB.resultn   | <  | 3.15        |                |    |             |                | Missing | 0.009000966  | 40           |    |
| ALB.resultn   | >= | 3.15        | ALK.times.uln  | =  | Missing     | Sodium.resultn | =       | Missing      | 0            | 40 |
| ALB.resultn   | >= | 3.15        | ALK.times.uln  | =  | Missing     | Sodium.resultn | <       | 138.5        | 0.004617545  | 40 |
| ALB.resultn   | >= | 3.15        | ALK.times.uln  | =  | Missing     | Sodium.resultn | >=      | 138.5        | -2.38E-05    | 40 |
| ALB.resultn   | >= | 3.15        | ALK.times.uln  | <  | 5.963877551 |                | Missing | 9.15E-05     | 40           |    |
| ALB.resultn   | >= | 3.15        | ALK.times.uln  | >= | 5.963877551 |                | Missing | 0.00511234   | 40           |    |
| ALK.times.uln | =  | Missing     | TBILI.resultn  | =  | Missing     |                |         | -0.002051552 | 41           |    |
| ALK.times.uln | =  | Missing     | TBILI.resultn  | <  | 1.15        |                |         | -0.001524719 | 41           |    |
| ALK.times.uln | =  | Missing     | TBILI.resultn  | >= | 1.15        |                |         | 0.004295868  | 41           |    |
| ALK.times.uln | <  | 6.02        | TBILI.resultn  | =  | Missing     |                |         | -0.001592966 | 41           |    |
| ALK.times.uln | <  | 6.02        | TBILI.resultn  | <  | 1.65        |                |         | -0.001808232 | 41           |    |
| ALK.times.uln | <  | 6.02        | TBILI.resultn  | >= | 1.65        |                |         | 0            | 41           |    |
| ALK.times.uln | >= | 6.02        |                |    |             |                |         | 0.003274155  | 41           |    |
| TBILI.resultn | =  | Missing     |                |    |             |                | Missing | 6.81E-05     | 42           |    |
| TBILI.resultn | <  | 1.65        |                |    |             |                | Missing | 0.000337025  | 42           |    |
| TBILI.resultn | >= | 1.65        | ALB.resultn    | =  | Missing     |                | Missing | 0.009531215  | 42           |    |
| TBILI.resultn | >= | 1.65        | ALB.resultn    | <  | 3.35        |                | Missing | 0.025745977  | 42           |    |
| TBILI.resultn | >= | 1.65        | ALB.resultn    | >= | 3.35        | psc.yrs.dur    | =       | Missing      | 0.0018099    | 42 |
| TBILI.resultn | >= | 1.65        | ALB.resultn    | >= | 3.35        | psc.yrs.dur    | <       | 0.516084873  | 0.00380079   | 42 |
| TBILI.resultn | >= | 1.65        | ALB.resultn    | >= | 3.35        | psc.yrs.dur    | >=      | 0.516084873  | 0            | 42 |
| ALB.resultn   | =  | Missing     |                |    |             |                |         | -0.000708223 | 43           |    |
| ALB.resultn   | <  | 3.31        | TBILI.resultn  | =  | Missing     |                |         | 0.004906966  | 43           |    |
| ALB.resultn   | <  | 3.31        | TBILI.resultn  | <  | 1.55        |                |         | 0.000109031  | 43           |    |
| ALB.resultn   | <  | 3.31        | TBILI.resultn  | >= | 1.55        |                |         | 0.012758133  | 43           |    |
| ALB.resultn   | >= | 3.31        | TBILI.resultn  | =  | Missing     |                |         | -0.000933759 | 43           |    |
| ALB.resultn   | >= | 3.31        | TBILI.resultn  | <  | 0.85        |                |         | -0.001457575 | 43           |    |
| ALB.resultn   | >= | 3.31        | TBILI.resultn  | >= | 0.85        |                |         | 0            | 43           |    |
| TBILI.resultn | =  | Missing     |                |    |             |                |         | 0.001529774  | 44           |    |
| TBILI.resultn | <  | 1.55        | Sodium.resultn | =  | Missing     |                |         | 0            | 44           |    |
| TBILI.resultn | <  | 1.55        | Sodium.resultn | <  | 137.5       |                |         | 0.002242087  | 44           |    |
| TBILI.resultn | <  | 1.55        | Sodium.resultn | >= | 137.5       |                |         | -3.53E-05    | 44           |    |
| TBILI.resultn | >= | 1.55        | ALB.resultn    | =  | Missing     |                |         | 0.004580123  | 44           |    |
| TBILI.resultn | >= | 1.55        | ALB.resultn    | <  | 3.55        |                |         | 0.010472754  | 44           |    |
| TBILI.resultn | >= | 1.55        | ALB.resultn    | >= | 3.55        |                |         | 0.000858461  | 44           |    |
| TBILI.resultn | =  | Missing     |                |    |             |                |         | -0.0006387   | 45           |    |

|               |    |                          |    |                   |               |         |              |              |    |
|---------------|----|--------------------------|----|-------------------|---------------|---------|--------------|--------------|----|
| TBILL.resultn | <  | 2.05 ALK.times.uln       | =  | Missing           |               |         | 0            | 45           |    |
| TBILL.resultn | <  | 2.05 ALK.times.uln       | <  | 5.963877551       |               |         | -0.000527899 | 45           |    |
| TBILL.resultn | <  | 2.05 ALK.times.uln       | >= | 5.963877551       |               |         | 0.003444296  | 45           |    |
| TBILL.resultn | >= | 2.05 age.yrs             | =  | Missing           |               |         | 0.007219425  | 45           |    |
| TBILL.resultn | >= | 2.05 age.yrs             | <  | 48.73511294       |               |         | 0.003648922  | 45           |    |
| TBILL.resultn | >= | 2.05 age.yrs             | >= | 48.73511294       |               |         | 0.010465337  | 45           |    |
| ALB.resultn   | =  | Missing                  |    |                   |               |         | 0.000218281  | 46           |    |
| ALB.resultn   | <  | 3.31 TBILL.resultn       | =  | Missing           |               |         | 0.005504863  | 46           |    |
| ALB.resultn   | <  | 3.31 TBILL.resultn       | <  | 1.31              |               |         | 0.001548955  | 46           |    |
| ALB.resultn   | <  | 3.31 TBILL.resultn       | >= | 1.31              |               |         | 0.011258911  | 46           |    |
| ALB.resultn   | >= | 3.31 Sodium.resultn      | =  | Missing           |               |         | 0            | 46           |    |
| ALB.resultn   | >= | 3.31 Sodium.resultn      | <  | 137.5             |               |         | 0.003128771  | 46           |    |
| ALB.resultn   | >= | 3.31 Sodium.resultn      | >= | 137.5             |               |         | 0.000226337  | 46           |    |
| TBILL.resultn | =  | Missing                  |    |                   |               |         | 0.001153243  | 47           |    |
| TBILL.resultn | <  | 2.35 Sodium.resultn      | =  | Missing           |               |         | 0            | 47           |    |
| TBILL.resultn | <  | 2.35 Sodium.resultn      | <  | 136.5             |               |         | 0.003155013  | 47           |    |
| TBILL.resultn | <  | 2.35 Sodium.resultn      | >= | 136.5             |               |         | 0.000444633  | 47           |    |
| TBILL.resultn | >= | 2.35 PLT.resultn         | =  | Missing           |               |         | 0.006422574  | 47           |    |
| TBILL.resultn | >= | 2.35 PLT.resultn         | <  | 225.5             |               |         | 0.011696771  | 47           |    |
| TBILL.resultn | >= | 2.35 PLT.resultn         | >= | 225.5             |               |         | 0.001627849  | 47           |    |
| ALB.resultn   | =  | Missing                  |    |                   |               |         | -0.001762762 | 48           |    |
| ALB.resultn   | <  | 3.225 TBILL.resultn      | =  | Missing           |               |         | 0.004617235  | 48           |    |
| ALB.resultn   | <  | 3.225 TBILL.resultn      | <  | 1.31              |               |         | 0.000371687  | 48           |    |
| ALB.resultn   | <  | 3.225 TBILL.resultn      | >= | 1.31              |               |         | 0.007730637  | 48           |    |
| ALB.resultn   | >= | 3.225 Hemoglobin.resultn | =  | Missing           |               |         | 0            | 48           |    |
| ALB.resultn   | >= | 3.225 Hemoglobin.resultn | <  | 13.55             |               |         | -0.002140392 | 48           |    |
| ALB.resultn   | >= | 3.225 Hemoglobin.resultn | >= | 13.55             |               |         | -0.001797862 | 48           |    |
| ALB.resultn   | =  | Missing                  |    |                   |               | Missing | -0.007807426 | 49           |    |
| ALB.resultn   | <  | 3.105                    |    |                   |               | Missing | -0.001861373 | 49           |    |
| ALB.resultn   | >= | 3.105 age.yrs            | =  | Missing           |               | Missing | -0.00774089  | 49           |    |
| ALB.resultn   | >= | 3.105 age.yrs            | <  | 54.39972621       |               | Missing | -0.00834344  | 49           |    |
| ALB.resultn   | >= | 3.105 age.yrs            | >= | 54.39972621       | TBILL.resultn | =       | Missing      | -0.00607566  | 49 |
| ALB.resultn   | >= | 3.105 age.yrs            | >= | 54.39972621       | TBILL.resultn | <       | 0.95         | -0.007956222 | 49 |
| ALB.resultn   | >= | 3.105 age.yrs            | >= | 54.39972621       | TBILL.resultn | >=      | 0.95         | 0            | 49 |
| TBILL.resultn | =  | Missing                  |    |                   |               |         | 0.001709516  | 50           |    |
| TBILL.resultn | <  | 1.9 Sodium.resultn       | =  | Missing           |               |         | 0            | 50           |    |
| TBILL.resultn | <  | 1.9 Sodium.resultn       | <  | 137.5             |               |         | 0.00316282   | 50           |    |
| TBILL.resultn | <  | 1.9 Sodium.resultn       | >= | 137.5             |               |         | 0.000335473  | 50           |    |
| TBILL.resultn | >= | 1.9 PLT.resultn          | =  | Missing           |               |         | 0.005547984  | 50           |    |
| TBILL.resultn | >= | 1.9 PLT.resultn          | <  | 220               |               |         | 0.009938889  | 50           |    |
| TBILL.resultn | >= | 1.9 PLT.resultn          | >= | 220               |               |         | 0.001832602  | 50           |    |
| ALB.resultn   | =  | Missing                  |    |                   |               | Missing | -0.012148948 | 51           |    |
| ALB.resultn   | <  | 2.95                     |    |                   |               | Missing | 0.000993261  | 51           |    |
| ALB.resultn   | >= | 2.95 age.yrs             | =  | Missing           |               | Missing | -0.011321982 | 51           |    |
| ALB.resultn   | >= | 2.95 age.yrs             | <  | 51.58521561       |               | Missing | -0.012163362 | 51           |    |
| ALB.resultn   | >= | 2.95 age.yrs             | >= | 51.58521561       | TBILL.resultn | =       | Missing      | -0.009482964 | 51 |
| ALB.resultn   | >= | 2.95 age.yrs             | >= | 51.58521561       | TBILL.resultn | <       | 1.55         | -0.011063457 | 51 |
| ALB.resultn   | >= | 2.95 age.yrs             | >= | 51.58521561       | TBILL.resultn | >=      | 1.55         | 0            | 51 |
| TBILL.resultn | =  | Missing                  |    |                   |               | Missing | 1.23E-05     | 52           |    |
| TBILL.resultn | <  | 0.95                     |    |                   |               | Missing | 0.00020816   | 52           |    |
| TBILL.resultn | >= | 0.95 Hemoglobin.resultn  | =  | Missing           |               | Missing | 0.006044366  | 52           |    |
| TBILL.resultn | >= | 0.95 Hemoglobin.resultn  | <  | 13.35 PLT.resultn | =             | Missing | 0.002625966  | 52           |    |
| TBILL.resultn | >= | 0.95 Hemoglobin.resultn  | <  | 13.35 PLT.resultn | <             | 271.5   | 0.006783746  | 52           |    |
| TBILL.resultn | >= | 0.95 Hemoglobin.resultn  | <  | 13.35 PLT.resultn | >=            | 271.5   | 0            | 52           |    |
| TBILL.resultn | >= | 0.95 Hemoglobin.resultn  | >= | 13.35             |               | Missing | 0.000422019  | 52           |    |
| TBILL.resultn | =  | Missing                  |    |                   |               |         | -0.000294756 | 53           |    |
| TBILL.resultn | <  | 2.05 TBILL.resultn       | =  | Missing           |               |         | -0.000889844 | 53           |    |
| TBILL.resultn | <  | 2.05 TBILL.resultn       | <  | 0.75              |               |         | -0.001546286 | 53           |    |
| TBILL.resultn | <  | 2.05 TBILL.resultn       | >= | 0.75              |               |         | 0            | 53           |    |
| TBILL.resultn | >= | 2.05 Hemoglobin.resultn  | =  | Missing           |               |         | 0.001895455  | 53           |    |
| TBILL.resultn | >= | 2.05 Hemoglobin.resultn  | <  | 12.9              |               |         | 0.004357466  | 53           |    |
| TBILL.resultn | >= | 2.05 Hemoglobin.resultn  | >= | 12.9              |               |         | -0.001551359 | 53           |    |

|               |    |         |                |    |                         |              |                             |
|---------------|----|---------|----------------|----|-------------------------|--------------|-----------------------------|
| ALB.resultn   | =  | Missing |                |    | Missing                 | -0.011540595 | 54                          |
| ALB.resultn   | <  | 2.825   |                |    | Missing                 | 0.000771391  | 54                          |
| ALB.resultn   | >= | 2.825   | TBILL.resultn  | =  | Missing                 | -0.010662107 | 54                          |
| ALB.resultn   | >= | 2.825   | TBILL.resultn  | <  | 1.25                    | -0.011333533 | 54                          |
| ALB.resultn   | >= | 2.825   | TBILL.resultn  | >= | 1.25 psc.yrs.dur        | =            | Missing -0.008742067 54     |
| ALB.resultn   | >= | 2.825   | TBILL.resultn  | >= | 1.25 psc.yrs.dur        | <            | 7.805612594 -0.010602081 54 |
| ALB.resultn   | >= | 2.825   | TBILL.resultn  | >= | 1.25 psc.yrs.dur        | >=           | 7.805612594 0 54            |
| TBILL.resultn | =  | Missing |                |    |                         | 0.000344922  | 55                          |
| TBILL.resultn | <  | 1.95    | ALK.times.uln  | =  | Missing                 | 0            | 55                          |
| TBILL.resultn | <  | 1.95    | ALK.times.uln  | <  | 6.115825908             | -0.000260156 | 55                          |
| TBILL.resultn | <  | 1.95    | ALK.times.uln  | >= | 6.115825908             | 0.0026798    | 55                          |
| TBILL.resultn | >= | 1.95    | PLT.resultn    | =  | Missing                 | 0.004207897  | 55                          |
| TBILL.resultn | >= | 1.95    | PLT.resultn    | <  | 224                     | 0.010643625  | 55                          |
| TBILL.resultn | >= | 1.95    | PLT.resultn    | >= | 224                     | 0.001143265  | 55                          |
| TBILL.resultn | =  | Missing |                |    | Missing                 | 0.001732804  | 56                          |
| TBILL.resultn | <  | 1.65    |                |    | Missing                 | 0.000465446  | 56                          |
| TBILL.resultn | >= | 1.65    | ALB.resultn    | =  | Missing                 | 0.004687804  | 56                          |
| TBILL.resultn | >= | 1.65    | ALB.resultn    | <  | 3.35                    | 0.012607118  | 56                          |
| TBILL.resultn | >= | 1.65    | ALB.resultn    | >= | 3.35 ALK.times.uln      | =            | Missing 0.000555987 56      |
| TBILL.resultn | >= | 1.65    | ALB.resultn    | >= | 3.35 ALK.times.uln      | <            | 3.408179808 0.001111975 56  |
| TBILL.resultn | >= | 1.65    | ALB.resultn    | >= | 3.35 ALK.times.uln      | >=           | 3.408179808 0 56            |
| ALK.times.uln | =  | Missing | TBILL.resultn  | =  | Missing                 | Missing      | -0.010334798 57             |
| ALK.times.uln | =  | Missing | TBILL.resultn  | <  | 0.95                    | Missing      | -0.010339103 57             |
| ALK.times.uln | =  | Missing | TBILL.resultn  | >= | 0.95 age.yrs            | =            | Missing -0.005632056 57     |
| ALK.times.uln | =  | Missing | TBILL.resultn  | >= | 0.95 age.yrs            | <            | 48.92128679 -0.010325436 57 |
| ALK.times.uln | =  | Missing | TBILL.resultn  | >= | 0.95 age.yrs            | >=           | 48.92128679 0 57            |
| ALK.times.uln | <  | 6.02    |                |    | Missing                 | -0.00978153  | 57                          |
| ALK.times.uln | >= | 6.02    |                |    | Missing                 | -0.004771191 | 57                          |
| ALB.resultn   | =  | Missing |                |    | Missing                 | -0.004730146 | 58                          |
| ALB.resultn   | <  | 2.875   |                |    | Missing                 | 0.004926089  | 58                          |
| ALB.resultn   | >= | 2.875   | TBILL.resultn  | =  | Missing                 | -0.003830694 | 58                          |
| ALB.resultn   | >= | 2.875   | TBILL.resultn  | <  | 0.75                    | -0.004743621 | 58                          |
| ALB.resultn   | >= | 2.875   | TBILL.resultn  | >= | 0.75 ALK.times.uln      | =            | Missing 0 58                |
| ALB.resultn   | >= | 2.875   | TBILL.resultn  | >= | 0.75 ALK.times.uln      | <            | 3.173513753 -0.004284065 58 |
| ALB.resultn   | >= | 2.875   | TBILL.resultn  | >= | 0.75 ALK.times.uln      | >=           | 3.173513753 -0.002453998 58 |
| ALB.resultn   | =  | Missing |                |    | Missing                 | -0.007550293 | 59                          |
| ALB.resultn   | <  | 2.965   |                |    | Missing                 | 0.000236038  | 59                          |
| ALB.resultn   | >= | 2.965   | psc.yrs.dur    | =  | Missing                 | -0.007230189 | 59                          |
| ALB.resultn   | >= | 2.965   | psc.yrs.dur    | <  | 6.410677618             | -0.007671944 | 59                          |
| ALB.resultn   | >= | 2.965   | psc.yrs.dur    | >= | 6.410677618 AST.resultn | =            | Missing -0.00350408 59      |
| ALB.resultn   | >= | 2.965   | psc.yrs.dur    | >= | 6.410677618 AST.resultn | <            | 47.5 -0.008059385 59        |
| ALB.resultn   | >= | 2.965   | psc.yrs.dur    | >= | 6.410677618 AST.resultn | >=           | 47.5 0 59                   |
| ALB.resultn   | =  | Missing |                |    | Missing                 | -0.005395108 | 60                          |
| ALB.resultn   | <  | 2.915   |                |    | Missing                 | 0.002735749  | 60                          |
| ALB.resultn   | >= | 2.915   | PLT.resultn    | =  | Missing                 | -0.005583032 | 60                          |
| ALB.resultn   | >= | 2.915   | PLT.resultn    | <  | 195.5 TBILL.resultn     | =            | Missing -0.002804064 60     |
| ALB.resultn   | >= | 2.915   | PLT.resultn    | <  | 195.5 TBILL.resultn     | <            | 0.85 -0.006075471 60        |
| ALB.resultn   | >= | 2.915   | PLT.resultn    | <  | 195.5 TBILL.resultn     | >=           | 0.85 0 60                   |
| ALB.resultn   | >= | 2.915   | PLT.resultn    | >= | 195.5                   | Missing      | -0.005635369 60             |
| TBILL.resultn | =  | Missing |                |    |                         | 0.000573981  | 61                          |
| TBILL.resultn | <  | 2.05    | ALK.times.uln  | =  | Missing                 | 0            | 61                          |
| TBILL.resultn | <  | 2.05    | ALK.times.uln  | <  | 5.92438247              | -0.00032566  | 61                          |
| TBILL.resultn | <  | 2.05    | ALK.times.uln  | >= | 5.92438247              | 0.004746998  | 61                          |
| TBILL.resultn | >= | 2.05    | age.yrs        | =  | Missing                 | 0.00564906   | 61                          |
| TBILL.resultn | >= | 2.05    | age.yrs        | <  | 45.724846               | 0.000547683  | 61                          |
| TBILL.resultn | >= | 2.05    | age.yrs        | >= | 45.724846               | 0.013811264  | 61                          |
| TBILL.resultn | =  | Missing |                |    |                         | -0.000304852 | 62                          |
| TBILL.resultn | <  | 1.95    | Sodium.resultn | =  | Missing                 | 0            | 62                          |
| TBILL.resultn | <  | 1.95    | Sodium.resultn | <  | 136.5                   | 0.002790516  | 62                          |
| TBILL.resultn | <  | 1.95    | Sodium.resultn | >= | 136.5                   | 0.000229232  | 62                          |
| TBILL.resultn | >= | 1.95    | PLT.resultn    | =  | Missing                 | 0.005632266  | 62                          |
| TBILL.resultn | >= | 1.95    | PLT.resultn    | <  | 222                     | 0.011661478  | 62                          |



|               |    |         |                |    |             |                    |    |              |              |    |
|---------------|----|---------|----------------|----|-------------|--------------------|----|--------------|--------------|----|
| TBILL.resultn | >= | 1.95    | PLT.resultn    | >= | 222         |                    |    | 0.001864009  | 62           |    |
| TBILL.resultn | =  | Missing |                |    |             |                    |    | 0.001629024  | 63           |    |
| TBILL.resultn | <  | 2.05    | Sodium.resultn | =  | Missing     |                    |    | 0            | 63           |    |
| TBILL.resultn | <  | 2.05    | Sodium.resultn | <  | 137.5       |                    |    | 0.003279414  | 63           |    |
| TBILL.resultn | <  | 2.05    | Sodium.resultn | >= | 137.5       |                    |    | 0.000239     | 63           |    |
| TBILL.resultn | >= | 2.05    | AST.resultn    | =  | Missing     |                    |    | 0.006090737  | 63           |    |
| TBILL.resultn | >= | 2.05    | AST.resultn    | <  | 101         |                    |    | 0.004171979  | 63           |    |
| TBILL.resultn | >= | 2.05    | AST.resultn    | >= | 101         |                    |    | 0.008009494  | 63           |    |
| ALB.resultn   | =  | Missing |                |    |             |                    |    | -0.000601442 | 64           |    |
| ALB.resultn   | <  | 3.53    | PLT.resultn    | =  | Missing     |                    |    | 0.004428948  | 64           |    |
| ALB.resultn   | <  | 3.53    | PLT.resultn    | <  | 226.5       |                    |    | 0.016012503  | 64           |    |
| ALB.resultn   | <  | 3.53    | PLT.resultn    | >= | 226.5       |                    |    | 0.000138742  | 64           |    |
| ALB.resultn   | >= | 3.53    | TBILL.resultn  | =  | Missing     |                    |    | -0.000785924 | 64           |    |
| ALB.resultn   | >= | 3.53    | TBILL.resultn  | <  | 0.85        |                    |    | -0.001253414 | 64           |    |
| ALB.resultn   | >= | 3.53    | TBILL.resultn  | >= | 0.85        |                    |    | 0            | 64           |    |
| ALB.resultn   | =  | Missing |                |    |             | Missing            |    | -0.003712256 | 65           |    |
| ALB.resultn   | <  | 3.105   |                |    |             | Missing            |    | 0.003535468  | 65           |    |
| ALB.resultn   | >= | 3.105   | PLT.resultn    | =  | Missing     | Missing            |    | -0.003620422 | 65           |    |
| ALB.resultn   | >= | 3.105   | PLT.resultn    | <  | 249.5       | age.yrs            | =  | Missing      | -0.002673805 | 65 |
| ALB.resultn   | >= | 3.105   | PLT.resultn    | <  | 249.5       | age.yrs            | <  | 53.46475017  | -0.003897411 | 65 |
| ALB.resultn   | >= | 3.105   | PLT.resultn    | <  | 249.5       | age.yrs            | >= | 53.46475017  | 0            | 65 |
| ALB.resultn   | >= | 3.105   | PLT.resultn    | >= | 249.5       |                    |    | Missing      | -0.004209863 | 65 |
| ALB.resultn   | =  | Missing |                |    |             | Missing            |    | Missing      | -0.004675724 | 66 |
| ALB.resultn   | <  | 2.965   |                |    |             | Missing            |    | Missing      | 0.001403894  | 66 |
| ALB.resultn   | >= | 2.965   | ALK.times.uln  | =  | Missing     | TBILL.resultn      | =  | Missing      | -0.003690075 | 66 |
| ALB.resultn   | >= | 2.965   | ALK.times.uln  | =  | Missing     | TBILL.resultn      | <  | 1.15         | -0.005594629 | 66 |
| ALB.resultn   | >= | 2.965   | ALK.times.uln  | =  | Missing     | TBILL.resultn      | >= | 1.15         | 0            | 66 |
| ALB.resultn   | >= | 2.965   | ALK.times.uln  | <  | 5.446215139 |                    |    | Missing      | -0.005347099 | 66 |
| ALB.resultn   | >= | 2.965   | ALK.times.uln  | >= | 5.446215139 |                    |    | Missing      | -0.002771204 | 66 |
| TBILL.resultn | =  | Missing |                |    |             |                    |    | Missing      | -0.004185892 | 67 |
| TBILL.resultn | <  | 1.25    |                |    |             |                    |    | Missing      | -0.003627764 | 67 |
| TBILL.resultn | >= | 1.25    | PLT.resultn    | =  | Missing     |                    |    | Missing      | -0.000946493 | 67 |
| TBILL.resultn | >= | 1.25    | PLT.resultn    | <  | 216         |                    |    | Missing      | 0.003979673  | 67 |
| TBILL.resultn | >= | 1.25    | PLT.resultn    | >= | 216         | ALK.times.uln      | =  | Missing      | -0.00268514  | 67 |
| TBILL.resultn | >= | 1.25    | PLT.resultn    | >= | 216         | ALK.times.uln      | <  | 5.359345228  | -0.004176885 | 67 |
| TBILL.resultn | >= | 1.25    | PLT.resultn    | >= | 216         | ALK.times.uln      | >= | 5.359345228  | 0            | 67 |
| ALB.resultn   | =  | Missing |                |    |             |                    |    |              | -0.0013276   | 68 |
| ALB.resultn   | <  | 3.31    | TBILL.resultn  | =  | Missing     |                    |    |              | 0.005284002  | 68 |
| ALB.resultn   | <  | 3.31    | TBILL.resultn  | <  | 1.2         |                    |    |              | 0.000998563  | 68 |
| ALB.resultn   | <  | 3.31    | TBILL.resultn  | >= | 1.2         |                    |    |              | 0.01042653   | 68 |
| ALB.resultn   | >= | 3.31    | TBILL.resultn  | =  | Missing     |                    |    |              | -0.00062402  | 68 |
| ALB.resultn   | >= | 3.31    | TBILL.resultn  | <  | 0.75        |                    |    |              | -0.001349783 | 68 |
| ALB.resultn   | >= | 3.31    | TBILL.resultn  | >= | 0.75        |                    |    |              | 0            | 68 |
| ALB.resultn   | =  | Missing |                |    |             |                    |    | Missing      | -0.004981961 | 69 |
| ALB.resultn   | <  | 2.95    |                |    |             |                    |    | Missing      | 0.000892013  | 69 |
| ALB.resultn   | >= | 2.95    | age.yrs        | =  | Missing     |                    |    | Missing      | -0.004422779 | 69 |
| ALB.resultn   | >= | 2.95    | age.yrs        | <  | 53.35934292 |                    |    | Missing      | -0.005166062 | 69 |
| ALB.resultn   | >= | 2.95    | age.yrs        | >= | 53.35934292 | TBILL.resultn      | =  | Missing      | -0.00270751  | 69 |
| ALB.resultn   | >= | 2.95    | age.yrs        | >= | 53.35934292 | TBILL.resultn      | <  | 0.75         | -0.005415021 | 69 |
| ALB.resultn   | >= | 2.95    | age.yrs        | >= | 53.35934292 | TBILL.resultn      | >= | 0.75         | 0            | 69 |
| TBILL.resultn | =  | Missing |                |    |             |                    |    |              | -0.001458485 | 70 |
| TBILL.resultn | <  | 1.25    | psc.yrs.dur    | =  | Missing     |                    |    |              | -0.001039188 | 70 |
| TBILL.resultn | <  | 1.25    | psc.yrs.dur    | <  | 1.961670089 |                    |    |              | -0.001451689 | 70 |
| TBILL.resultn | <  | 1.25    | psc.yrs.dur    | >= | 1.961670089 |                    |    |              | 0            | 70 |
| TBILL.resultn | >= | 1.25    | age.yrs        | =  | Missing     |                    |    |              | 0.002921227  | 70 |
| TBILL.resultn | >= | 1.25    | age.yrs        | <  | 54.56947296 |                    |    |              | 0.000156084  | 70 |
| TBILL.resultn | >= | 1.25    | age.yrs        | >= | 54.56947296 |                    |    |              | 0.012492876  | 70 |
| ALB.resultn   | =  | Missing |                |    |             |                    |    | Missing      | -0.00523515  | 71 |
| ALB.resultn   | <  | 2.95    |                |    |             |                    |    | Missing      | 0.005127346  | 71 |
| ALB.resultn   | >= | 2.95    | TBILL.resultn  | =  | Missing     |                    |    | Missing      | -0.004547944 | 71 |
| ALB.resultn   | >= | 2.95    | TBILL.resultn  | <  | 0.95        |                    |    | Missing      | -0.005245989 | 71 |
| ALB.resultn   | >= | 2.95    | TBILL.resultn  | >= | 0.95        | Hemoglobin.resultn | =  | Missing      | 0            | 71 |

|                |    |             |                    |    |             |                    |    |             |              |    |
|----------------|----|-------------|--------------------|----|-------------|--------------------|----|-------------|--------------|----|
| ALB.resultn    | >= | 2.95        | TBILL.resultn      | >= | 0.95        | Hemoglobin.resultn | <  | 13.75       | -0.002860437 | 71 |
| ALB.resultn    | >= | 2.95        | TBILL.resultn      | >= | 0.95        | Hemoglobin.resultn | >= | 13.75       | -0.005250713 | 71 |
| age.yrs        | =  | Missing     |                    |    |             |                    |    | Missing     | -0.014360203 | 72 |
| age.yrs        | <  | 53.46475017 |                    |    |             |                    |    | Missing     | -0.015250954 | 72 |
| age.yrs        | >= | 53.46475017 | AST.resultn        | =  | Missing     |                    |    | Missing     | -0.011923736 | 72 |
| age.yrs        | >= | 53.46475017 | AST.resultn        | <  | 51.5        |                    |    | Missing     | -0.015634635 | 72 |
| age.yrs        | >= | 53.46475017 | AST.resultn        | >= | 51.5        | psc.yrs.dur        | =  | Missing     | -0.007614305 | 72 |
| age.yrs        | >= | 53.46475017 | AST.resultn        | >= | 51.5        | psc.yrs.dur        | <  | 1.890485969 | -0.011802173 | 72 |
| age.yrs        | >= | 53.46475017 | AST.resultn        | >= | 51.5        | psc.yrs.dur        | >= | 1.890485969 | 0            | 72 |
| TBILL.resultn  | =  | Missing     |                    |    |             |                    |    | Missing     | 0.001706181  | 73 |
| TBILL.resultn  | <  | 0.85        |                    |    |             |                    |    | Missing     | 8.56E-05     | 73 |
| TBILL.resultn  | >= | 0.85        | Hemoglobin.resultn | =  | Missing     |                    |    | Missing     | 0.004884496  | 73 |
| TBILL.resultn  | >= | 0.85        | Hemoglobin.resultn | <  | 13.8        | PLT.resultn        | =  | Missing     | 0.002982428  | 73 |
| TBILL.resultn  | >= | 0.85        | Hemoglobin.resultn | <  | 13.8        | PLT.resultn        | <  | 252         | 0.008259031  | 73 |
| TBILL.resultn  | >= | 0.85        | Hemoglobin.resultn | <  | 13.8        | PLT.resultn        | >= | 252         | 0            | 73 |
| TBILL.resultn  | >= | 0.85        | Hemoglobin.resultn | >= | 13.8        |                    |    | Missing     | 0.000267303  | 73 |
| ALB.resultn    | =  | Missing     |                    |    |             |                    |    | Missing     | -0.00417205  | 74 |
| ALB.resultn    | <  | 2.825       |                    |    |             |                    |    | Missing     | 0.00464002   | 74 |
| ALB.resultn    | >= | 2.825       | TBILL.resultn      | =  | Missing     |                    |    | Missing     | -0.003797875 | 74 |
| ALB.resultn    | >= | 2.825       | TBILL.resultn      | <  | 0.85        |                    |    | Missing     | -0.004558111 | 74 |
| ALB.resultn    | >= | 2.825       | TBILL.resultn      | >= | 0.85        | age.yrs            | =  | Missing     | -0.002639841 | 74 |
| ALB.resultn    | >= | 2.825       | TBILL.resultn      | >= | 0.85        | age.yrs            | <  | 51.63175907 | -0.003914247 | 74 |
| ALB.resultn    | >= | 2.825       | TBILL.resultn      | >= | 0.85        | age.yrs            | >= | 51.63175907 | 0            | 74 |
| Sodium.resultn | =  | Missing     |                    |    |             |                    |    | Missing     | -0.008138106 | 75 |
| Sodium.resultn | <  | 136.5       |                    |    |             |                    |    | Missing     | -0.003899099 | 75 |
| Sodium.resultn | >= | 136.5       | ALK.times.uln      | =  | Missing     | TBILL.resultn      | =  | Missing     | -0.005580712 | 75 |
| Sodium.resultn | >= | 136.5       | ALK.times.uln      | =  | Missing     | TBILL.resultn      | <  | 1.05        | -0.008517929 | 75 |
| Sodium.resultn | >= | 136.5       | ALK.times.uln      | =  | Missing     | TBILL.resultn      | >= | 1.05        | 0            | 75 |
| Sodium.resultn | >= | 136.5       | ALK.times.uln      | <  | 6.02        |                    |    | Missing     | -0.008264367 | 75 |
| Sodium.resultn | >= | 136.5       | ALK.times.uln      | >= | 6.02        |                    |    | Missing     | -0.005322602 | 75 |
| TBILL.resultn  | =  | Missing     |                    |    |             |                    |    |             | 0.000170807  | 76 |
| TBILL.resultn  | <  | 1.95        | ALK.times.uln      | =  | Missing     |                    |    |             | 0            | 76 |
| TBILL.resultn  | <  | 1.95        | ALK.times.uln      | <  | 5.92438247  |                    |    |             | -0.000478659 | 76 |
| TBILL.resultn  | <  | 1.95        | ALK.times.uln      | >= | 5.92438247  |                    |    |             | 0.002988003  | 76 |
| TBILL.resultn  | >= | 1.95        | PLT.resultn        | =  | Missing     |                    |    |             | 0.004067044  | 76 |
| TBILL.resultn  | >= | 1.95        | PLT.resultn        | <  | 220.5       |                    |    |             | 0.010514181  | 76 |
| TBILL.resultn  | >= | 1.95        | PLT.resultn        | >= | 220.5       |                    |    |             | 0.000127126  | 76 |
| ALB.resultn    | =  | Missing     |                    |    |             |                    |    | Missing     | -0.003735798 | 77 |
| ALB.resultn    | <  | 3.135       |                    |    |             |                    |    | Missing     | 0.002084056  | 77 |
| ALB.resultn    | >= | 3.135       | psc.yrs.dur        | =  | Missing     |                    |    | Missing     | -0.004200234 | 77 |
| ALB.resultn    | >= | 3.135       | psc.yrs.dur        | <  | 4.999315537 |                    |    | Missing     | -0.004500563 | 77 |
| ALB.resultn    | >= | 3.135       | psc.yrs.dur        | >= | 4.999315537 | TBILL.resultn      | =  | Missing     | -0.002758654 | 77 |
| ALB.resultn    | >= | 3.135       | psc.yrs.dur        | >= | 4.999315537 | TBILL.resultn      | <  | 0.95        | -0.004689713 | 77 |
| ALB.resultn    | >= | 3.135       | psc.yrs.dur        | >= | 4.999315537 | TBILL.resultn      | >= | 0.95        | 0            | 77 |
| ALB.resultn    | =  | Missing     |                    |    |             |                    |    |             | -0.001229323 | 78 |
| ALB.resultn    | <  | 3.31        | AST.resultn        | =  | Missing     |                    |    |             | 0.005799072  | 78 |
| ALB.resultn    | <  | 3.31        | AST.resultn        | <  | 106.5       |                    |    |             | 0.001694942  | 78 |
| ALB.resultn    | <  | 3.31        | AST.resultn        | >= | 106.5       |                    |    |             | 0.01236568   | 78 |
| ALB.resultn    | >= | 3.31        | ALK.times.uln      | =  | Missing     |                    |    |             | 0            | 78 |
| ALB.resultn    | >= | 3.31        | ALK.times.uln      | <  | 3.593257185 |                    |    |             | -0.00125613  | 78 |
| ALB.resultn    | >= | 3.31        | ALK.times.uln      | >= | 3.593257185 |                    |    |             | -0.000267225 | 78 |
| TBILL.resultn  | =  | Missing     |                    |    |             |                    |    |             | -0.001829501 | 79 |
| TBILL.resultn  | <  | 1.25        | AST.resultn        | =  | Missing     |                    |    |             | -0.001479099 | 79 |
| TBILL.resultn  | <  | 1.25        | AST.resultn        | <  | 90          |                    |    |             | -0.001822833 | 79 |
| TBILL.resultn  | <  | 1.25        | AST.resultn        | >= | 90          |                    |    |             | 0            | 79 |
| TBILL.resultn  | >= | 1.25        | PLT.resultn        | =  | Missing     |                    |    |             | 0.001690527  | 79 |
| TBILL.resultn  | >= | 1.25        | PLT.resultn        | <  | 216         |                    |    |             | 0.00982555   | 79 |
| TBILL.resultn  | >= | 1.25        | PLT.resultn        | >= | 216         |                    |    |             | -0.00124712  | 79 |
| ALB.resultn    | =  | Missing     |                    |    |             |                    |    |             | -0.000711812 | 80 |
| ALB.resultn    | <  | 3.345       | TBILL.resultn      | =  | Missing     |                    |    |             | 0.004563808  | 80 |
| ALB.resultn    | <  | 3.345       | TBILL.resultn      | <  | 1.35        |                    |    |             | -0.000250415 | 80 |
| ALB.resultn    | <  | 3.345       | TBILL.resultn      | >= | 1.35        |                    |    |             | 0.011303721  | 80 |

|               |    |         |               |    |             |                    |         |              |              |    |
|---------------|----|---------|---------------|----|-------------|--------------------|---------|--------------|--------------|----|
| ALB.resultn   | >= | 3.345   | TBILL.resultn | =  | Missing     |                    |         | -0.00075446  | 80           |    |
| ALB.resultn   | >= | 3.345   | TBILL.resultn | <  | 0.85        |                    |         | -0.001318664 | 80           |    |
| ALB.resultn   | >= | 3.345   | TBILL.resultn | >= | 0.85        |                    |         | 0            | 80           |    |
| TBILL.resultn | =  | Missing |               |    |             |                    |         | -0.001868928 | 81           |    |
| TBILL.resultn | <  | 2.05    | age.yrs       | =  | Missing     |                    |         | -0.001238839 | 81           |    |
| TBILL.resultn | <  | 2.05    | age.yrs       | <  | 53.46475017 |                    |         | -0.001783928 | 81           |    |
| TBILL.resultn | <  | 2.05    | age.yrs       | >= | 53.46475017 |                    |         | 0            | 81           |    |
| TBILL.resultn | >= | 2.05    | AST.resultn   | =  | Missing     |                    |         | 0.002357177  | 81           |    |
| TBILL.resultn | >= | 2.05    | AST.resultn   | <  | 101         |                    |         | -9.44E-05    | 81           |    |
| TBILL.resultn | >= | 2.05    | AST.resultn   | >= | 101         |                    |         | 0.004620216  | 81           |    |
| ALB.resultn   | =  | Missing |               |    |             | Missing            |         | -0.001345445 | 82           |    |
| ALB.resultn   | <  | 3.585   | AST.resultn   | =  | Missing     | Missing            |         | 0.001835427  | 82           |    |
| ALB.resultn   | <  | 3.585   | AST.resultn   | <  | 99          | Hemoglobin.resultn | =       | Missing      | -0.0011453   | 82 |
| ALB.resultn   | <  | 3.585   | AST.resultn   | <  | 99          | Hemoglobin.resultn | <       | 12.7         | -0.002026301 | 82 |
| ALB.resultn   | <  | 3.585   | AST.resultn   | <  | 99          | Hemoglobin.resultn | >=      | 12.7         | 0            | 82 |
| ALB.resultn   | <  | 3.585   | AST.resultn   | >= | 99          |                    | Missing | 0.009038853  | 82           |    |
| ALB.resultn   | >= | 3.585   |               |    |             |                    | Missing | -0.001681956 | 82           |    |
| ALB.resultn   | =  | Missing |               |    |             |                    | Missing | -0.004466883 | 83           |    |
| ALB.resultn   | <  | 2.915   |               |    |             |                    | Missing | 0.004376669  | 83           |    |
| ALB.resultn   | >= | 2.915   | TBILL.resultn | =  | Missing     |                    | Missing | -0.004302592 | 83           |    |
| ALB.resultn   | >= | 2.915   | TBILL.resultn | <  | 0.95        |                    | Missing | -0.00502715  | 83           |    |
| ALB.resultn   | >= | 2.915   | TBILL.resultn | >= | 0.95        | age.yrs            | =       | Missing      | -0.002903102 | 83 |
| ALB.resultn   | >= | 2.915   | TBILL.resultn | >= | 0.95        | age.yrs            | <       | 51.76180698  | -0.004415135 | 83 |
| ALB.resultn   | >= | 2.915   | TBILL.resultn | >= | 0.95        | age.yrs            | >=      | 51.76180698  | 0            | 83 |
| TBILL.resultn | =  | Missing |               |    |             |                    |         | 0.000738708  | 84           |    |
| TBILL.resultn | <  | 1.95    | ALK.times.uln | =  | Missing     |                    |         | 0            | 84           |    |
| TBILL.resultn | <  | 1.95    | ALK.times.uln | <  | 2.822501299 |                    |         | -2.43E-05    | 84           |    |
| TBILL.resultn | <  | 1.95    | ALK.times.uln | >= | 2.822501299 |                    |         | 0.001729047  | 84           |    |
| TBILL.resultn | >= | 1.95    | ALB.resultn   | =  | Missing     |                    |         | 0.003798619  | 84           |    |
| TBILL.resultn | >= | 1.95    | ALB.resultn   | <  | 3.44        |                    |         | 0.007379757  | 84           |    |
| TBILL.resultn | >= | 1.95    | ALB.resultn   | >= | 3.44        |                    |         | 0.001692067  | 84           |    |
| TBILL.resultn | =  | Missing |               |    |             |                    |         | -0.000283871 | 85           |    |
| TBILL.resultn | <  | 1.95    | ALK.times.uln | =  | Missing     |                    |         | 0            | 85           |    |
| TBILL.resultn | <  | 1.95    | ALK.times.uln | <  | 5.92438247  |                    |         | -0.000937263 | 85           |    |
| TBILL.resultn | <  | 1.95    | ALK.times.uln | >= | 5.92438247  |                    |         | 0.002679172  | 85           |    |
| TBILL.resultn | >= | 1.95    | age.yrs       | =  | Missing     |                    |         | 0.00583494   | 85           |    |
| TBILL.resultn | >= | 1.95    | age.yrs       | <  | 46.21081451 |                    |         | -0.000234051 | 85           |    |
| TBILL.resultn | >= | 1.95    | age.yrs       | >= | 46.21081451 |                    |         | 0.012455659  | 85           |    |
| TBILL.resultn | =  | Missing |               |    |             |                    |         | 0.000618731  | 86           |    |
| TBILL.resultn | <  | 1.65    | ALK.times.uln | =  | Missing     |                    |         | 0            | 86           |    |
| TBILL.resultn | <  | 1.65    | ALK.times.uln | <  | 5.963877551 |                    |         | 0.000145544  | 86           |    |
| TBILL.resultn | <  | 1.65    | ALK.times.uln | >= | 5.963877551 |                    |         | 0.002815445  | 86           |    |
| TBILL.resultn | >= | 1.65    | age.yrs       | =  | Missing     |                    |         | 0.005159299  | 86           |    |
| TBILL.resultn | >= | 1.65    | age.yrs       | <  | 50.97330595 |                    |         | 0.000721578  | 86           |    |
| TBILL.resultn | >= | 1.65    | age.yrs       | >= | 50.97330595 |                    |         | 0.01443817   | 86           |    |
| ALB.resultn   | =  | Missing |               |    |             |                    | Missing | -0.000804256 | 87           |    |
| ALB.resultn   | <  | 3.15    |               |    |             |                    | Missing | 0.007086915  | 87           |    |
| ALB.resultn   | >= | 3.15    | TBILL.resultn | =  | Missing     |                    | Missing | -0.0005212   | 87           |    |
| ALB.resultn   | >= | 3.15    | TBILL.resultn | <  | 0.85        |                    | Missing | -0.001302532 | 87           |    |
| ALB.resultn   | >= | 3.15    | TBILL.resultn | >= | 0.85        | Sodium.resultn     | =       | Missing      | 0            | 87 |
| ALB.resultn   | >= | 3.15    | TBILL.resultn | >= | 0.85        | Sodium.resultn     | <       | 138.5        | 0.003377505  | 87 |
| ALB.resultn   | >= | 3.15    | TBILL.resultn | >= | 0.85        | Sodium.resultn     | >=      | 138.5        | -0.000349763 | 87 |
| ALK.times.uln | =  | Missing |               |    |             |                    | Missing | -0.003226421 | 88           |    |
| ALK.times.uln | <  | 6.02    | PLT.resultn   | =  | Missing     |                    | Missing | -0.002906215 | 88           |    |
| ALK.times.uln | <  | 6.02    | PLT.resultn   | <  | 185.5       |                    | Missing | 0.001692836  | 88           |    |
| ALK.times.uln | <  | 6.02    | PLT.resultn   | >= | 185.5       | age.yrs            | =       | Missing      | -0.003282238 | 88 |
| ALK.times.uln | <  | 6.02    | PLT.resultn   | >= | 185.5       | age.yrs            | <       | 67.4770705   | -0.003502522 | 88 |
| ALK.times.uln | <  | 6.02    | PLT.resultn   | >= | 185.5       | age.yrs            | >=      | 67.4770705   | 0            | 88 |
| ALK.times.uln | >= | 6.02    |               |    |             |                    | Missing | 0.001197207  | 88           |    |
| ALB.resultn   | =  | Missing |               |    |             |                    | Missing | -0.005057765 | 89           |    |
| ALB.resultn   | <  | 2.965   |               |    |             |                    | Missing | 0.001088839  | 89           |    |
| ALB.resultn   | >= | 2.965   | PLT.resultn   | =  | Missing     |                    | Missing | -0.004464534 | 89           |    |

|               |    |                         |    |                         |    |             |              |    |
|---------------|----|-------------------------|----|-------------------------|----|-------------|--------------|----|
| ALB.resultn   | >= | 2.965 PLT.resultn       | <  | 195.5 PLT.resultn       | =  | Missing     | -0.001947519 | 89 |
| ALB.resultn   | >= | 2.965 PLT.resultn       | <  | 195.5 PLT.resultn       | <  | 181.5       | -0.00371799  | 89 |
| ALB.resultn   | >= | 2.965 PLT.resultn       | <  | 195.5 PLT.resultn       | >= | 181.5       | 0            | 89 |
| ALB.resultn   | >= | 2.965 PLT.resultn       | >= | 195.5                   |    | Missing     | -0.004886945 | 89 |
| ALB.resultn   | =  | Missing                 |    |                         |    | Missing     | -0.004483448 | 90 |
| ALB.resultn   | <  | 3.225                   |    |                         |    | Missing     | -0.000791894 | 90 |
| ALB.resultn   | >= | 3.225 age.yrs           | =  | Missing                 |    | Missing     | -0.004229831 | 90 |
| ALB.resultn   | >= | 3.225 age.yrs           | <  | 53.46475017             |    | Missing     | -0.004665498 | 90 |
| ALB.resultn   | >= | 3.225 age.yrs           | >= | 53.46475017 AST.resultn | =  | Missing     | -0.002714468 | 90 |
| ALB.resultn   | >= | 3.225 age.yrs           | >= | 53.46475017 AST.resultn | <  | 50.5        | -0.004994621 | 90 |
| ALB.resultn   | >= | 3.225 age.yrs           | >= | 53.46475017 AST.resultn | >= | 50.5        | 0            | 90 |
| ALB.resultn   | =  | Missing                 |    |                         |    | Missing     | -0.004888    | 91 |
| ALB.resultn   | <  | 3.15                    |    |                         |    | Missing     | -0.001295458 | 91 |
| ALB.resultn   | >= | 3.15 TBILL.resultn      | =  | Missing                 |    | Missing     | -0.004954328 | 91 |
| ALB.resultn   | >= | 3.15 TBILL.resultn      | <  | 0.75                    |    | Missing     | -0.005666343 | 91 |
| ALB.resultn   | >= | 3.15 TBILL.resultn      | >= | 0.75 psc.yrs.dur        | =  | Missing     | -0.004170393 | 91 |
| ALB.resultn   | >= | 3.15 TBILL.resultn      | >= | 0.75 psc.yrs.dur        | <  | 6.324435318 | -0.004857282 | 91 |
| ALB.resultn   | >= | 3.15 TBILL.resultn      | >= | 0.75 psc.yrs.dur        | >= | 6.324435318 | 0            | 91 |
| TBILL.resultn | =  | Missing                 |    |                         |    |             | 8.08E-05     | 92 |
| TBILL.resultn | <  | 1.55 TBILL.resultn      | =  | Missing                 |    |             | -0.001066369 | 92 |
| TBILL.resultn | <  | 1.55 TBILL.resultn      | <  | 0.85                    |    |             | -0.001526672 | 92 |
| TBILL.resultn | <  | 1.55 TBILL.resultn      | >= | 0.85                    |    |             | 0            | 92 |
| TBILL.resultn | >= | 1.55 age.yrs            | =  | Missing                 |    |             | 0.004515672  | 92 |
| TBILL.resultn | >= | 1.55 age.yrs            | <  | 50.71321013             |    |             | -0.000522149 | 92 |
| TBILL.resultn | >= | 1.55 age.yrs            | >= | 50.71321013             |    |             | 0.015011131  | 92 |
| ALB.resultn   | =  | Missing                 |    |                         |    | Missing     | -0.003994176 | 93 |
| ALB.resultn   | <  | 3.13                    |    |                         |    | Missing     | 0.000426249  | 93 |
| ALB.resultn   | >= | 3.13 age.yrs            | =  | Missing                 |    | Missing     | -0.003739759 | 93 |
| ALB.resultn   | >= | 3.13 age.yrs            | <  | 51.63175907             |    | Missing     | -0.004298252 | 93 |
| ALB.resultn   | >= | 3.13 age.yrs            | >= | 51.63175907 AST.resultn | =  | Missing     | -0.002497738 | 93 |
| ALB.resultn   | >= | 3.13 age.yrs            | >= | 51.63175907 AST.resultn | <  | 57.5        | -0.004522932 | 93 |
| ALB.resultn   | >= | 3.13 age.yrs            | >= | 51.63175907 AST.resultn | >= | 57.5        | 0            | 93 |
| ALB.resultn   | =  | Missing                 |    |                         |    | Missing     | -0.002303419 | 94 |
| ALB.resultn   | <  | 3.15                    |    |                         |    | Missing     | 0.003353243  | 94 |
| ALB.resultn   | >= | 3.15 PLT.resultn        | =  | Missing                 |    | Missing     | -0.001784086 | 94 |
| ALB.resultn   | >= | 3.15 PLT.resultn        | <  | 249.5 ALK.times.uln     | =  | Missing     | 0            | 94 |
| ALB.resultn   | >= | 3.15 PLT.resultn        | <  | 249.5 ALK.times.uln     | <  | 2.84063745  | -0.002023698 | 94 |
| ALB.resultn   | >= | 3.15 PLT.resultn        | <  | 249.5 ALK.times.uln     | >= | 2.84063745  | 0.002917098  | 94 |
| ALB.resultn   | >= | 3.15 PLT.resultn        | >= | 249.5                   |    | Missing     | -0.002311496 | 94 |
| TBILL.resultn | =  | Missing                 |    |                         |    |             | -0.000357409 | 95 |
| TBILL.resultn | <  | 2.05 TBILL.resultn      | =  | Missing                 |    |             | -0.000854775 | 95 |
| TBILL.resultn | <  | 2.05 TBILL.resultn      | <  | 0.85                    |    |             | -0.001431408 | 95 |
| TBILL.resultn | <  | 2.05 TBILL.resultn      | >= | 0.85                    |    |             | 0            | 95 |
| TBILL.resultn | >= | 2.05 Hemoglobin.resultn | =  | Missing                 |    |             | 0.001862183  | 95 |
| TBILL.resultn | >= | 2.05 Hemoglobin.resultn | <  | 12.9                    |    |             | 0.005768828  | 95 |
| TBILL.resultn | >= | 2.05 Hemoglobin.resultn | >= | 12.9                    |    |             | -0.00144344  | 95 |
| ALB.resultn   | =  | Missing                 |    |                         |    | Missing     | -0.00021875  | 96 |
| ALB.resultn   | <  | 2.965                   |    |                         |    | Missing     | 0.007352096  | 96 |
| ALB.resultn   | >= | 2.965 PLT.resultn       | =  | Missing                 |    | Missing     | -0.000692296 | 96 |
| ALB.resultn   | >= | 2.965 PLT.resultn       | <  | 209.5 ALB.resultn       | =  | Missing     | 0.001847345  | 96 |
| ALB.resultn   | >= | 2.965 PLT.resultn       | <  | 209.5 ALB.resultn       | <  | 3.75        | 0.007574113  | 96 |
| ALB.resultn   | >= | 2.965 PLT.resultn       | <  | 209.5 ALB.resultn       | >= | 3.75        | 0            | 96 |
| ALB.resultn   | >= | 2.965 PLT.resultn       | >= | 209.5                   |    | Missing     | -0.000760083 | 96 |
| ALB.resultn   | =  | Missing                 |    |                         |    | Missing     | -0.000937043 | 97 |
| ALB.resultn   | <  | 2.875                   |    |                         |    | Missing     | 0.005277867  | 97 |
| ALB.resultn   | >= | 2.875 TBILL.resultn     | =  | Missing                 |    | Missing     | -0.000539191 | 97 |
| ALB.resultn   | >= | 2.875 TBILL.resultn     | <  | 2.05 psc.yrs.dur        | =  | Missing     | -0.000798173 | 97 |
| ALB.resultn   | >= | 2.875 TBILL.resultn     | <  | 2.05 psc.yrs.dur        | <  | 0.839151266 | -0.001351293 | 97 |
| ALB.resultn   | >= | 2.875 TBILL.resultn     | <  | 2.05 psc.yrs.dur        | >= | 0.839151266 | 0            | 97 |
| ALB.resultn   | >= | 2.875 TBILL.resultn     | >= | 2.05                    |    | Missing     | 0.001732786  | 97 |
| TBILL.resultn | =  | Missing                 |    |                         |    |             | -0.000669803 | 98 |
| TBILL.resultn | <  | 2.45 age.yrs            | =  | Missing                 |    |             | -0.001725543 | 98 |

|               |    |                     |    |                                |    |             |              |     |
|---------------|----|---------------------|----|--------------------------------|----|-------------|--------------|-----|
| TBILL.resultn | <  | 2.45 age.yrs        | <  | 55.97809719                    |    |             | -0.002159393 | 98  |
| TBILL.resultn | <  | 2.45 age.yrs        | >= | 55.97809719                    |    |             | 0            | 98  |
| TBILL.resultn | >= | 2.45 psc.yrs.dur    | =  | Missing                        |    |             | 0.002777342  | 98  |
| TBILL.resultn | >= | 2.45 psc.yrs.dur    | <  | 2.0862423                      |    |             | 0.000213403  | 98  |
| TBILL.resultn | >= | 2.45 psc.yrs.dur    | >= | 2.0862423                      |    |             | 0.00534128   | 98  |
| ALB.resultn   | =  | Missing             |    |                                |    | Missing     | -0.001114239 | 99  |
| ALB.resultn   | <  | 3.105               |    |                                |    | Missing     | 0.003462612  | 99  |
| ALB.resultn   | >= | 3.105 PLT.resultn   | =  | Missing                        |    | Missing     | -0.001467958 | 99  |
| ALB.resultn   | >= | 3.105 PLT.resultn   | <  | 185.5                          |    | Missing     | 0.00505377   | 99  |
| ALB.resultn   | >= | 3.105 PLT.resultn   | >= | 185.5 TBILL.resultn            | =  | Missing     | -0.000835642 | 99  |
| ALB.resultn   | >= | 3.105 PLT.resultn   | >= | 185.5 TBILL.resultn            | <  | 0.95        | -0.001346313 | 99  |
| ALB.resultn   | >= | 3.105 PLT.resultn   | >= | 185.5 TBILL.resultn            | >= | 0.95        | 0            | 99  |
| TBILL.resultn | =  | Missing             |    |                                |    |             | -1.52E-05    | 100 |
| TBILL.resultn | <  | 1.55 Sodium.resultn | =  | Missing                        |    |             | 0            | 100 |
| TBILL.resultn | <  | 1.55 Sodium.resultn | <  | 137.5                          |    |             | 0.003872491  | 100 |
| TBILL.resultn | <  | 1.55 Sodium.resultn | >= | 137.5                          |    |             | 0.000540147  | 100 |
| TBILL.resultn | >= | 1.55 age.yrs        | =  | Missing                        |    |             | 0.003359194  | 100 |
| TBILL.resultn | >= | 1.55 age.yrs        | <  | 50.05612594                    |    |             | 0.0010805    | 100 |
| TBILL.resultn | >= | 1.55 age.yrs        | >= | 50.05612594                    |    |             | 0.008828058  | 100 |
| ALK.times.uln | =  | Missing ALB.resultn | =  | Missing                        |    |             | -0.001336603 | 101 |
| ALK.times.uln | =  | Missing ALB.resultn | <  | 3.95                           |    |             | 0.002261784  | 101 |
| ALK.times.uln | =  | Missing ALB.resultn | >= | 3.95                           |    |             | -0.000997778 | 101 |
| ALK.times.uln | <  | 5.727171315 age.yrs | =  | Missing                        |    |             | -0.000851923 | 101 |
| ALK.times.uln | <  | 5.727171315 age.yrs | <  | 49.02395619                    |    |             | -0.00133635  | 101 |
| ALK.times.uln | <  | 5.727171315 age.yrs | >= | 49.02395619                    |    |             | 0            | 101 |
| ALK.times.uln | >= | 5.727171315         |    |                                |    |             | 0.003675306  | 101 |
| TBILL.resultn | =  | Missing             |    |                                |    | Missing     | -0.000655541 | 102 |
| TBILL.resultn | <  | 1.25                |    |                                |    | Missing     | -0.002737772 | 102 |
| TBILL.resultn | >= | 1.25 age.yrs        | =  | Missing                        |    | Missing     | -0.000243802 | 102 |
| TBILL.resultn | >= | 1.25 age.yrs        | <  | 54.22039699 Hemoglobin.resultn | =  | Missing     | 0            | 102 |
| TBILL.resultn | >= | 1.25 age.yrs        | <  | 54.22039699 Hemoglobin.resultn | <  | 13.35       | -0.002037042 | 102 |
| TBILL.resultn | >= | 1.25 age.yrs        | <  | 54.22039699 Hemoglobin.resultn | >= | 13.35       | -0.003135309 | 102 |
| TBILL.resultn | >= | 1.25 age.yrs        | >= | 54.22039699                    |    | Missing     | 0.004123972  | 102 |
| TBILL.resultn | =  | Missing             |    |                                |    |             | -0.000233069 | 103 |
| TBILL.resultn | <  | 1.95 TBILL.resultn  | =  | Missing                        |    |             | -0.000786832 | 103 |
| TBILL.resultn | <  | 1.95 TBILL.resultn  | <  | 0.85                           |    |             | -0.001218132 | 103 |
| TBILL.resultn | <  | 1.95 TBILL.resultn  | >= | 0.85                           |    |             | 0            | 103 |
| TBILL.resultn | >= | 1.95 PLT.resultn    | =  | Missing                        |    |             | 0.003371453  | 103 |
| TBILL.resultn | >= | 1.95 PLT.resultn    | <  | 220.5                          |    |             | 0.010086731  | 103 |
| TBILL.resultn | >= | 1.95 PLT.resultn    | >= | 220.5                          |    |             | -0.00051634  | 103 |
| ALB.resultn   | =  | Missing             |    |                                |    |             | -0.001165411 | 104 |
| ALB.resultn   | <  | 3.41 PLT.resultn    | =  | Missing                        |    |             | 0.003678604  | 104 |
| ALB.resultn   | <  | 3.41 PLT.resultn    | <  | 249.5                          |    |             | 0.010936431  | 104 |
| ALB.resultn   | <  | 3.41 PLT.resultn    | >= | 249.5                          |    |             | -0.000468726 | 104 |
| ALB.resultn   | >= | 3.41 age.yrs        | =  | Missing                        |    |             | -0.00100239  | 104 |
| ALB.resultn   | >= | 3.41 age.yrs        | <  | 53.46475017                    |    |             | -0.001375542 | 104 |
| ALB.resultn   | >= | 3.41 age.yrs        | >= | 53.46475017                    |    |             | 0            | 104 |
| ALB.resultn   | =  | Missing             |    |                                |    |             | -0.001024023 | 105 |
| ALB.resultn   | <  | 3.31 TBILL.resultn  | =  | Missing                        |    |             | 0.007288882  | 105 |
| ALB.resultn   | <  | 3.31 TBILL.resultn  | <  | 1.31                           |    |             | 5.09E-05     | 105 |
| ALB.resultn   | <  | 3.31 TBILL.resultn  | >= | 1.31                           |    |             | 0.018145788  | 105 |
| ALB.resultn   | >= | 3.31 TBILL.resultn  | =  | Missing                        |    |             | -0.000531376 | 105 |
| ALB.resultn   | >= | 3.31 TBILL.resultn  | <  | 0.75                           |    |             | -0.001052124 | 105 |
| ALB.resultn   | >= | 3.31 TBILL.resultn  | >= | 0.75                           |    |             | 0            | 105 |
| ALB.resultn   | =  | Missing             |    |                                |    | Missing     | -0.00204593  | 106 |
| ALB.resultn   | <  | 3.245               |    |                                |    | Missing     | 0.00378145   | 106 |
| ALB.resultn   | >= | 3.245 PLT.resultn   | =  | Missing                        |    | Missing     | -0.002629486 | 106 |
| ALB.resultn   | >= | 3.245 PLT.resultn   | <  | 249.5 ALK.times.uln            | =  | Missing     | 0            | 106 |
| ALB.resultn   | >= | 3.245 PLT.resultn   | <  | 249.5 ALK.times.uln            | <  | 3.136549454 | -0.002266136 | 106 |
| ALB.resultn   | >= | 3.245 PLT.resultn   | <  | 249.5 ALK.times.uln            | >= | 3.136549454 | 0.002301441  | 106 |
| ALB.resultn   | >= | 3.245 PLT.resultn   | >= | 249.5                          |    | Missing     | -0.002622282 | 106 |
| TBILL.resultn | =  | Missing             |    |                                |    |             | 0.001431583  | 107 |

|               |    |                     |    |                     |    |             |              |     |
|---------------|----|---------------------|----|---------------------|----|-------------|--------------|-----|
| TBILL.resultn | <  | 1.95 Sodium.resultn | =  | Missing             |    |             | 0            | 107 |
| TBILL.resultn | <  | 1.95 Sodium.resultn | <  | 136.5               |    |             | 0.003547185  | 107 |
| TBILL.resultn | <  | 1.95 Sodium.resultn | >= | 136.5               |    |             | 0.000146478  | 107 |
| TBILL.resultn | >= | 1.95 age.yrs        | =  | Missing             |    |             | 0.004889767  | 107 |
| TBILL.resultn | >= | 1.95 age.yrs        | <  | 49.60848734         |    |             | 0.001124027  | 107 |
| TBILL.resultn | >= | 1.95 age.yrs        | >= | 49.60848734         |    |             | 0.011291526  | 107 |
| TBILL.resultn | =  | Missing             |    |                     |    | Missing     | 0.000373427  | 108 |
| TBILL.resultn | <  | 3.5 ALB.resultn     | =  | Missing             |    | Missing     | -0.000312569 | 108 |
| TBILL.resultn | <  | 3.5 ALB.resultn     | <  | 3.15                |    | Missing     | 0.00381334   | 108 |
| TBILL.resultn | <  | 3.5 ALB.resultn     | >= | 3.15 Sodium.resultn | =  | Missing     | 0            | 108 |
| TBILL.resultn | <  | 3.5 ALB.resultn     | >= | 3.15 Sodium.resultn | <  | 137.5       | 0.002142276  | 108 |
| TBILL.resultn | <  | 3.5 ALB.resultn     | >= | 3.15 Sodium.resultn | >= | 137.5       | 3.25E-05     | 108 |
| TBILL.resultn | >= | 3.5                 |    |                     |    | Missing     | 0.00777955   | 108 |
| TBILL.resultn | =  | Missing             |    |                     |    |             | 0.000939498  | 109 |
| TBILL.resultn | <  | 1.65 Sodium.resultn | =  | Missing             |    |             | 0            | 109 |
| TBILL.resultn | <  | 1.65 Sodium.resultn | <  | 138.5               |    |             | 0.001671999  | 109 |
| TBILL.resultn | <  | 1.65 Sodium.resultn | >= | 138.5               |    |             | 0.000207642  | 109 |
| TBILL.resultn | >= | 1.65 PLT.resultn    | =  | Missing             |    |             | 0.00405264   | 109 |
| TBILL.resultn | >= | 1.65 PLT.resultn    | <  | 208                 |    |             | 0.010615848  | 109 |
| TBILL.resultn | >= | 1.65 PLT.resultn    | >= | 208                 |    |             | 0.000639772  | 109 |
| ALB.resultn   | =  | Missing             |    |                     |    | Missing     | 0.000497098  | 110 |
| ALB.resultn   | <  | 3.13                |    |                     |    | Missing     | 0.00499258   | 110 |
| ALB.resultn   | >= | 3.13 TBILL.resultn  | =  | Missing             |    | Missing     | 0.000346715  | 110 |
| ALB.resultn   | >= | 3.13 TBILL.resultn  | <  | 0.75                |    | Missing     | -0.000268743 | 110 |
| ALB.resultn   | >= | 3.13 TBILL.resultn  | >= | 0.75 PLT.resultn    | =  | Missing     | 0.001025622  | 110 |
| ALB.resultn   | >= | 3.13 TBILL.resultn  | >= | 0.75 PLT.resultn    | <  | 249.5       | 0.002167791  | 110 |
| ALB.resultn   | >= | 3.13 TBILL.resultn  | >= | 0.75 PLT.resultn    | >= | 249.5       | 0            | 110 |
| ALB.resultn   | =  | Missing             |    |                     |    |             | -0.001623793 | 111 |
| ALB.resultn   | <  | 3.35 psc.yrs.dur    | =  | Missing             |    |             | 0.003170676  | 111 |
| ALB.resultn   | <  | 3.35 psc.yrs.dur    | <  | 2.349075975         |    |             | -0.001465963 | 111 |
| ALB.resultn   | <  | 3.35 psc.yrs.dur    | >= | 2.349075975         |    |             | 0.00865034   | 111 |
| ALB.resultn   | >= | 3.35 age.yrs        | =  | Missing             |    |             | -0.001358079 | 111 |
| ALB.resultn   | >= | 3.35 age.yrs        | <  | 53.46475017         |    |             | -0.001903158 | 111 |
| ALB.resultn   | >= | 3.35 age.yrs        | >= | 53.46475017         |    |             | 0            | 111 |
| TBILL.resultn | =  | Missing             |    |                     |    | Missing     | -0.000982646 | 112 |
| TBILL.resultn | <  | 2.05 Sodium.resultn | =  | Missing             |    | Missing     | -0.002147403 | 112 |
| TBILL.resultn | <  | 2.05 Sodium.resultn | <  | 136.5               |    | Missing     | 0.000960308  | 112 |
| TBILL.resultn | <  | 2.05 Sodium.resultn | >= | 136.5 age.yrs       | =  | Missing     | -0.001499184 | 112 |
| TBILL.resultn | <  | 2.05 Sodium.resultn | >= | 136.5 age.yrs       | <  | 56.0752909  | -0.001988392 | 112 |
| TBILL.resultn | <  | 2.05 Sodium.resultn | >= | 136.5 age.yrs       | >= | 56.0752909  | 0            | 112 |
| TBILL.resultn | >= | 2.05                |    |                     |    | Missing     | 0.003073914  | 112 |
| ALB.resultn   | =  | Missing             |    |                     |    | Missing     | -0.008191254 | 113 |
| ALB.resultn   | <  | 3.135               |    |                     |    | Missing     | -0.00210166  | 113 |
| ALB.resultn   | >= | 3.135 TBILL.resultn | =  | Missing             |    | Missing     | -0.008097935 | 113 |
| ALB.resultn   | >= | 3.135 TBILL.resultn | <  | 1.65                |    | Missing     | -0.008516475 | 113 |
| ALB.resultn   | >= | 3.135 TBILL.resultn | >= | 1.65 age.yrs        | =  | Missing     | -0.004350095 | 113 |
| ALB.resultn   | >= | 3.135 TBILL.resultn | >= | 1.65 age.yrs        | <  | 49.60848734 | -0.007975175 | 113 |
| ALB.resultn   | >= | 3.135 TBILL.resultn | >= | 1.65 age.yrs        | >= | 49.60848734 | 0            | 113 |
| TBILL.resultn | =  | Missing             |    |                     |    | Missing     | -0.000103661 | 114 |
| TBILL.resultn | <  | 0.95                |    |                     |    | Missing     | -0.000755213 | 114 |
| TBILL.resultn | >= | 0.95 ALK.times.uln  | =  | Missing             |    | Missing     | 0.005301175  | 114 |
| TBILL.resultn | >= | 0.95 ALK.times.uln  | <  | 6.02 Sodium.resultn | =  | Missing     | 0            | 114 |
| TBILL.resultn | >= | 0.95 ALK.times.uln  | <  | 6.02 Sodium.resultn | <  | 138.5       | 0.001765968  | 114 |
| TBILL.resultn | >= | 0.95 ALK.times.uln  | <  | 6.02 Sodium.resultn | >= | 138.5       | -0.001032223 | 114 |
| TBILL.resultn | >= | 0.95 ALK.times.uln  | >= | 6.02                |    | Missing     | 0.003280304  | 114 |
| TBILL.resultn | =  | Missing             |    |                     |    |             | 0.000663763  | 115 |
| TBILL.resultn | <  | 1.95 ALK.times.uln  | =  | Missing             |    |             | 0            | 115 |
| TBILL.resultn | <  | 1.95 ALK.times.uln  | <  | 5.963877551         |    |             | -0.00016592  | 115 |
| TBILL.resultn | <  | 1.95 ALK.times.uln  | >= | 5.963877551         |    |             | 0.003909747  | 115 |
| TBILL.resultn | >= | 1.95 ALK.times.uln  | =  | Missing             |    |             | 0.003018299  | 115 |
| TBILL.resultn | >= | 1.95 ALK.times.uln  | <  | 4.678988394         |    |             | -0.000584862 | 115 |
| TBILL.resultn | >= | 1.95 ALK.times.uln  | >= | 4.678988394         |    |             | 0.007342091  | 115 |

|               |    |                         |    |                            |         |             |              |     |
|---------------|----|-------------------------|----|----------------------------|---------|-------------|--------------|-----|
| ALB.resultn   | =  | Missing                 |    |                            | Missing |             | -0.0098425   | 116 |
| ALB.resultn   | <  | 3.105                   |    |                            | Missing |             | -0.004794702 | 116 |
| ALB.resultn   | >= | 3.105 age.yrs           | =  | Missing                    | Missing |             | -0.00935203  | 116 |
| ALB.resultn   | >= | 3.105 age.yrs           | <  | 53.44969199                | Missing |             | -0.010086437 | 116 |
| ALB.resultn   | >= | 3.105 age.yrs           | >= | 53.44969199 TBILI.resultn  | =       | Missing     | -0.007630765 | 116 |
| ALB.resultn   | >= | 3.105 age.yrs           | >= | 53.44969199 TBILI.resultn  | <       | 1.25        | -0.009244965 | 116 |
| ALB.resultn   | >= | 3.105 age.yrs           | >= | 53.44969199 TBILI.resultn  | >=      | 1.25        | 0            | 116 |
| TBILI.resultn | =  | Missing                 |    |                            | Missing |             | -0.001939439 | 117 |
| TBILI.resultn | <  | 3.3 ALK.times.uln       | =  | Missing age.yrs            | =       | Missing     | -0.002139639 | 117 |
| TBILI.resultn | <  | 3.3 ALK.times.uln       | =  | Missing age.yrs            | <       | 53.35934292 | -0.00300706  | 117 |
| TBILI.resultn | <  | 3.3 ALK.times.uln       | =  | Missing age.yrs            | >=      | 53.35934292 | 0            | 117 |
| TBILI.resultn | <  | 3.3 ALK.times.uln       | <  | 5.973260021                | Missing |             | -0.002482472 | 117 |
| TBILI.resultn | <  | 3.3 ALK.times.uln       | >= | 5.973260021                | Missing |             | 7.47E-05     | 117 |
| TBILI.resultn | >= | 3.3                     |    |                            | Missing |             | 0.00360105   | 117 |
| TBILI.resultn | =  | Missing                 |    |                            |         |             | 0.000212769  | 118 |
| TBILI.resultn | <  | 1.65 ALK.times.uln      | =  | Missing                    |         |             | 0            | 118 |
| TBILI.resultn | <  | 1.65 ALK.times.uln      | <  | 2.795652174                |         |             | -0.00031754  | 118 |
| TBILI.resultn | <  | 1.65 ALK.times.uln      | >= | 2.795652174                |         |             | 0.001220346  | 118 |
| TBILI.resultn | >= | 1.65 ALB.resultn        | =  | Missing                    |         |             | 0.00460846   | 118 |
| TBILI.resultn | >= | 1.65 ALB.resultn        | <  | 3.755                      |         |             | 0.007401068  | 118 |
| TBILI.resultn | >= | 1.65 ALB.resultn        | >= | 3.755                      |         |             | 0.000546486  | 118 |
| age.yrs       | =  | Missing                 |    |                            | Missing |             | -0.000331431 | 119 |
| age.yrs       | <  | 69.84257358 psc.yrs.dur | =  | Missing                    | Missing |             | -0.000663572 | 119 |
| age.yrs       | <  | 69.84257358 psc.yrs.dur | <  | 2.05065024                 | Missing |             | -0.001145009 | 119 |
| age.yrs       | <  | 69.84257358 psc.yrs.dur | >= | 2.05065024 ALK.times.uln   | =       | Missing     | 0            | 119 |
| age.yrs       | <  | 69.84257358 psc.yrs.dur | >= | 2.05065024 ALK.times.uln   | <       | 2.773309179 | -0.000890473 | 119 |
| age.yrs       | <  | 69.84257358 psc.yrs.dur | >= | 2.05065024 ALK.times.uln   | >=      | 2.773309179 | 0.004362246  | 119 |
| age.yrs       | >= | 69.84257358             |    |                            | Missing |             | 0.007772805  | 119 |
| ALK.times.uln | =  | Missing ALB.resultn     | =  | Missing                    |         |             | 1.99E-06     | 120 |
| ALK.times.uln | =  | Missing ALB.resultn     | <  | 3.95                       |         |             | 0.004998401  | 120 |
| ALK.times.uln | =  | Missing ALB.resultn     | >= | 3.95                       |         |             | 5.82E-06     | 120 |
| ALK.times.uln | <  | 6.02 Sodium.resultn     | =  | Missing                    |         |             | 0            | 120 |
| ALK.times.uln | <  | 6.02 Sodium.resultn     | <  | 137.5                      |         |             | 0.002811934  | 120 |
| ALK.times.uln | <  | 6.02 Sodium.resultn     | >= | 137.5                      |         |             | 0.000280662  | 120 |
| ALK.times.uln | >= | 6.02                    |    |                            |         |             | 0.004667046  | 120 |
| ALB.resultn   | =  | Missing                 |    |                            | Missing |             | -0.001338717 | 121 |
| ALB.resultn   | <  | 3.13                    |    |                            | Missing |             | 0.003818264  | 121 |
| ALB.resultn   | >= | 3.13 age.yrs            | =  | Missing                    | Missing |             | -0.000617113 | 121 |
| ALB.resultn   | >= | 3.13 age.yrs            | <  | 49.41957563                | Missing |             | -0.001216576 | 121 |
| ALB.resultn   | >= | 3.13 age.yrs            | >= | 49.41957563 Sodium.resultn | =       | Missing     | 0            | 121 |
| ALB.resultn   | >= | 3.13 age.yrs            | >= | 49.41957563 Sodium.resultn | <       | 138.5       | 0.003141925  | 121 |
| ALB.resultn   | >= | 3.13 age.yrs            | >= | 49.41957563 Sodium.resultn | >=      | 138.5       | -0.000983536 | 121 |
| TBILI.resultn | =  | Missing                 |    |                            |         |             | 0.000780754  | 122 |
| TBILI.resultn | <  | 2.05 Sodium.resultn     | =  | Missing                    |         |             | 0            | 122 |
| TBILI.resultn | <  | 2.05 Sodium.resultn     | <  | 136.5                      |         |             | 0.003141072  | 122 |
| TBILI.resultn | <  | 2.05 Sodium.resultn     | >= | 136.5                      |         |             | 0.000639978  | 122 |
| TBILI.resultn | >= | 2.05 PLT.resultn        | =  | Missing                    |         |             | 0.005083194  | 122 |
| TBILI.resultn | >= | 2.05 PLT.resultn        | <  | 234.5                      |         |             | 0.010205914  | 122 |
| TBILI.resultn | >= | 2.05 PLT.resultn        | >= | 234.5                      |         |             | 0.001241154  | 122 |
| psc.yrs.dur   | =  | Missing                 |    |                            | Missing |             | -0.008971447 | 123 |
| psc.yrs.dur   | <  | 1.385352498             |    |                            | Missing |             | -0.00983836  | 123 |
| psc.yrs.dur   | >= | 1.385352498 ALB.resultn | =  | Missing                    | Missing |             | -0.007216981 | 123 |
| psc.yrs.dur   | >= | 1.385352498 ALB.resultn | <  | 3.65 age.yrs               | =       | Missing     | -0.003809768 | 123 |
| psc.yrs.dur   | >= | 1.385352498 ALB.resultn | <  | 3.65 age.yrs               | <       | 49.41957563 | -0.006803158 | 123 |
| psc.yrs.dur   | >= | 1.385352498 ALB.resultn | <  | 3.65 age.yrs               | >=      | 49.41957563 | 0            | 123 |
| psc.yrs.dur   | >= | 1.385352498 ALB.resultn | >= | 3.65                       | Missing |             | -0.008824157 | 123 |
| TBILI.resultn | =  | Missing                 |    |                            |         |             | -0.004581417 | 124 |
| TBILI.resultn | <  | 1.95 age.yrs            | =  | Missing                    |         |             | -0.005364737 | 124 |
| TBILI.resultn | <  | 1.95 age.yrs            | <  | 67.33470226                |         |             | -0.005638448 | 124 |
| TBILI.resultn | <  | 1.95 age.yrs            | >= | 67.33470226                |         |             | 0            | 124 |
| TBILI.resultn | >= | 1.95 age.yrs            | =  | Missing                    |         |             | -0.002327695 | 124 |
| TBILI.resultn | >= | 1.95 age.yrs            | <  | 51.23750856                |         |             | -0.004736646 | 124 |

|               |    |                         |    |                         |               |             |              |              |     |
|---------------|----|-------------------------|----|-------------------------|---------------|-------------|--------------|--------------|-----|
| TBILL.resultn | >= | 1.95 age.yrs            | >= | 51.23750856             |               |             | 0.002008416  | 124          |     |
| ALB.resultn   | =  | Missing                 |    |                         |               | Missing     | -0.007373009 | 125          |     |
| ALB.resultn   | <  | 3.105                   |    |                         |               | Missing     | -0.002157529 | 125          |     |
| ALB.resultn   | >= | 3.105 TBILL.resultn     | =  | Missing                 |               | Missing     | -0.007039187 | 125          |     |
| ALB.resultn   | >= | 3.105 TBILL.resultn     | <  | 0.95                    |               | Missing     | -0.00762781  | 125          |     |
| ALB.resultn   | >= | 3.105 TBILL.resultn     | >= | 0.95 psc.yrs.dur        | =             | Missing     | -0.005886813 | 125          |     |
| ALB.resultn   | >= | 3.105 TBILL.resultn     | >= | 0.95 psc.yrs.dur        | <             | 6.783025325 | -0.006851864 | 125          |     |
| ALB.resultn   | >= | 3.105 TBILL.resultn     | >= | 0.95 psc.yrs.dur        | >=            | 6.783025325 | 0            | 125          |     |
| TBILL.resultn | =  | Missing                 |    |                         |               |             | -1.22E-05    | 126          |     |
| TBILL.resultn | <  | 1.95 PLT.resultn        | =  | Missing                 |               |             | 0            | 126          |     |
| TBILL.resultn | <  | 1.95 PLT.resultn        | <  | 248.5                   |               |             | 0.001166306  | 126          |     |
| TBILL.resultn | <  | 1.95 PLT.resultn        | >= | 248.5                   |               |             | -4.77E-06    | 126          |     |
| TBILL.resultn | >= | 1.95 ALB.resultn        | =  | Missing                 |               |             | 0.006948454  | 126          |     |
| TBILL.resultn | >= | 1.95 ALB.resultn        | <  | 3.49                    |               |             | 0.012683262  | 126          |     |
| TBILL.resultn | >= | 1.95 ALB.resultn        | >= | 3.49                    |               |             | 0.002852162  | 126          |     |
| TBILL.resultn | =  | Missing                 |    |                         |               | Missing     | -0.005314187 | 127          |     |
| TBILL.resultn | <  | 2.05 psc.yrs.dur        | =  | Missing                 |               | Missing     | -0.004536435 | 127          |     |
| TBILL.resultn | <  | 2.05 psc.yrs.dur        | <  | 1.874058864             |               | Missing     | -0.005219938 | 127          |     |
| TBILL.resultn | <  | 2.05 psc.yrs.dur        | >= | 1.874058864 AST.resultn | =             | Missing     | -0.003050558 | 127          |     |
| TBILL.resultn | <  | 2.05 psc.yrs.dur        | >= | 1.874058864 AST.resultn | <             | 64          | -0.005318921 | 127          |     |
| TBILL.resultn | <  | 2.05 psc.yrs.dur        | >= | 1.874058864 AST.resultn | >=            | 64          | 0            | 127          |     |
| TBILL.resultn | >= | 2.05                    |    |                         |               | Missing     | -0.001437492 | 127          |     |
| ALB.resultn   | =  | Missing                 |    |                         |               |             | -0.000663372 | 128          |     |
| ALB.resultn   | <  | 3.31 Hemoglobin.resultn | =  | Missing                 |               |             | 0.001950335  | 128          |     |
| ALB.resultn   | <  | 3.31 Hemoglobin.resultn | <  | 12.25                   |               |             | 0.002516142  | 128          |     |
| ALB.resultn   | <  | 3.31 Hemoglobin.resultn | >= | 12.25                   |               |             | 0.001384529  | 128          |     |
| ALB.resultn   | >= | 3.31 ALK.times.uln      | =  | Missing                 |               |             | 0            | 128          |     |
| ALB.resultn   | >= | 3.31 ALK.times.uln      | <  | 5.462893197             |               |             | -0.000680805 | 128          |     |
| ALB.resultn   | >= | 3.31 ALK.times.uln      | >= | 5.462893197             |               |             | 0.003308418  | 128          |     |
| TBILL.resultn | =  | Missing                 |    |                         |               |             | 0.00061324   | 129          |     |
| TBILL.resultn | <  | 1.9 ALK.times.uln       | =  | Missing                 |               |             | 0            | 129          |     |
| TBILL.resultn | <  | 1.9 ALK.times.uln       | <  | 5.848260021             |               |             | -0.000139584 | 129          |     |
| TBILL.resultn | <  | 1.9 ALK.times.uln       | >= | 5.848260021             |               |             | 0.003226915  | 129          |     |
| TBILL.resultn | >= | 1.9 ALB.resultn         | =  | Missing                 |               |             | 0.004546048  | 129          |     |
| TBILL.resultn | >= | 1.9 ALB.resultn         | <  | 3.45                    |               |             | 0.008600775  | 129          |     |
| TBILL.resultn | >= | 1.9 ALB.resultn         | >= | 3.45                    |               |             | 0.001167108  | 129          |     |
| TBILL.resultn | =  | Missing                 |    |                         |               | Missing     | 0.000916737  | 130          |     |
| TBILL.resultn | <  | 1.65                    |    |                         |               | Missing     | 0.000453133  | 130          |     |
| TBILL.resultn | >= | 1.65 ALB.resultn        | =  | Missing                 |               | Missing     | 0.004739228  | 130          |     |
| TBILL.resultn | >= | 1.65 ALB.resultn        | <  | 3.35                    |               | Missing     | 0.010788955  | 130          |     |
| TBILL.resultn | >= | 1.65 ALB.resultn        | >= | 3.35 AST.resultn        | =             | Missing     | 0.001845879  | 130          |     |
| TBILL.resultn | >= | 1.65 ALB.resultn        | >= | 3.35 AST.resultn        | <             | 107.5       | 0.004245523  | 130          |     |
| TBILL.resultn | >= | 1.65 ALB.resultn        | >= | 3.35 AST.resultn        | >=            | 107.5       | 0            | 130          |     |
| ALB.resultn   | =  | Missing                 |    |                         |               |             | -0.002268659 | 131          |     |
| ALB.resultn   | <  | 3.225 TBILL.resultn     | =  | Missing                 |               |             | 0.002946608  | 131          |     |
| ALB.resultn   | <  | 3.225 TBILL.resultn     | <  | 1.4                     |               |             | -0.001068508 | 131          |     |
| ALB.resultn   | <  | 3.225 TBILL.resultn     | >= | 1.4                     |               |             | 0.007764747  | 131          |     |
| ALB.resultn   | >= | 3.225 psc.yrs.dur       | =  | Missing                 |               |             | -0.001597003 | 131          |     |
| ALB.resultn   | >= | 3.225 psc.yrs.dur       | <  | 4.999315537             |               |             | -0.001941268 | 131          |     |
| ALB.resultn   | >= | 3.225 psc.yrs.dur       | >= | 4.999315537             |               |             | 0            | 131          |     |
| PLT.resultn   | =  | Missing                 |    |                         |               | Missing     | -0.006135752 | 132          |     |
| PLT.resultn   | <  | 185.5                   |    |                         |               | Missing     | -0.000270445 | 132          |     |
| PLT.resultn   | >= | 185.5 ALK.times.uln     | =  | Missing                 | TBILL.resultn | =           | Missing      | -0.004223547 | 132 |
| PLT.resultn   | >= | 185.5 ALK.times.uln     | =  | Missing                 | TBILL.resultn | <           | 0.95         | -0.006546499 | 132 |
| PLT.resultn   | >= | 185.5 ALK.times.uln     | =  | Missing                 | TBILL.resultn | >=          | 0.95         | 0            | 132 |
| PLT.resultn   | >= | 185.5 ALK.times.uln     | <  | 5.438574341             |               | Missing     | -0.006214528 | 132          |     |
| PLT.resultn   | >= | 185.5 ALK.times.uln     | >= | 5.438574341             |               | Missing     | -0.003427613 | 132          |     |
| ALB.resultn   | =  | Missing                 |    |                         |               | Missing     | -0.005610236 | 133          |     |
| ALB.resultn   | <  | 3.105                   |    |                         |               | Missing     | 0.000736425  | 133          |     |
| ALB.resultn   | >= | 3.105 age.yrs           | =  | Missing                 |               | Missing     | -0.004644745 | 133          |     |
| ALB.resultn   | >= | 3.105 age.yrs           | <  | 53.64681725             |               | Missing     | -0.005311588 | 133          |     |
| ALB.resultn   | >= | 3.105 age.yrs           | >= | 53.64681725 AST.resultn | =             | Missing     | -0.002994037 | 133          |     |



|               |    |                       |    |                         |    |             |              |     |
|---------------|----|-----------------------|----|-------------------------|----|-------------|--------------|-----|
| ALB.resultn   | >= | 3.105 age.yrs         | >= | 53.64681725 AST.resultn | <  | 51          | -0.005613819 | 133 |
| ALB.resultn   | >= | 3.105 age.yrs         | >= | 53.64681725 AST.resultn | >= | 51          | 0            | 133 |
| TBILL.resultn | =  | Missing               |    |                         |    | Missing     | -0.003071769 | 134 |
| TBILL.resultn | <  | 3.4 ALK.times.uln     | =  | Missing age.yrs         | =  | Missing     | -0.002264599 | 134 |
| TBILL.resultn | <  | 3.4 ALK.times.uln     | =  | Missing age.yrs         | <  | 53.46475017 | -0.00306027  | 134 |
| TBILL.resultn | <  | 3.4 ALK.times.uln     | =  | Missing age.yrs         | >= | 53.46475017 | 0            | 134 |
| TBILL.resultn | <  | 3.4 ALK.times.uln     | <  | 5.462893197             |    | Missing     | -0.002712143 | 134 |
| TBILL.resultn | <  | 3.4 ALK.times.uln     | >= | 5.462893197             |    | Missing     | 0.00181772   | 134 |
| TBILL.resultn | >= | 3.4                   |    |                         |    | Missing     | 0.002605787  | 134 |
| TBILL.resultn | =  | Missing               |    |                         |    |             | 0.000963616  | 135 |
| TBILL.resultn | <  | 1.9 Sodium.resultn    | =  | Missing                 |    |             | 0            | 135 |
| TBILL.resultn | <  | 1.9 Sodium.resultn    | <  | 136.5                   |    |             | 0.002498163  | 135 |
| TBILL.resultn | <  | 1.9 Sodium.resultn    | >= | 136.5                   |    |             | -7.23E-05    | 135 |
| TBILL.resultn | >= | 1.9 PLT.resultn       | =  | Missing                 |    |             | 0.003927723  | 135 |
| TBILL.resultn | >= | 1.9 PLT.resultn       | <  | 219                     |    |             | 0.007221329  | 135 |
| TBILL.resultn | >= | 1.9 PLT.resultn       | >= | 219                     |    |             | 0.0010216    | 135 |
| ALB.resultn   | =  | Missing               |    |                         |    | Missing     | -0.002297418 | 136 |
| ALB.resultn   | <  | 2.95                  |    |                         |    | Missing     | 0.001063863  | 136 |
| ALB.resultn   | >= | 2.95 TBILL.resultn    | =  | Missing                 |    | Missing     | -0.002658701 | 136 |
| ALB.resultn   | >= | 2.95 TBILL.resultn    | <  | 0.85                    |    | Missing     | -0.003351911 | 136 |
| ALB.resultn   | >= | 2.95 TBILL.resultn    | >= | 0.85 ALK.times.uln      | =  | Missing     | 0            | 136 |
| ALB.resultn   | >= | 2.95 TBILL.resultn    | >= | 0.85 ALK.times.uln      | <  | 2.795652174 | -0.00306489  | 136 |
| ALB.resultn   | >= | 2.95 TBILL.resultn    | >= | 0.85 ALK.times.uln      | >= | 2.795652174 | -0.000647046 | 136 |
| ALB.resultn   | =  | Missing               |    |                         |    | Missing     | -0.004499177 | 137 |
| ALB.resultn   | <  | 3.105                 |    |                         |    | Missing     | 0.002086108  | 137 |
| ALB.resultn   | >= | 3.105 TBILL.resultn   | =  | Missing                 |    | Missing     | -0.003456329 | 137 |
| ALB.resultn   | >= | 3.105 TBILL.resultn   | <  | 0.85                    |    | Missing     | -0.004405395 | 137 |
| ALB.resultn   | >= | 3.105 TBILL.resultn   | >= | 0.85 age.yrs            | =  | Missing     | -0.002373051 | 137 |
| ALB.resultn   | >= | 3.105 TBILL.resultn   | >= | 0.85 age.yrs            | <  | 51.92060233 | -0.003789226 | 137 |
| ALB.resultn   | >= | 3.105 TBILL.resultn   | >= | 0.85 age.yrs            | >= | 51.92060233 | 0            | 137 |
| ALB.resultn   | =  | Missing               |    |                         |    | Missing     | -0.000276216 | 138 |
| ALB.resultn   | <  | 2.875                 |    |                         |    | Missing     | 0.005232759  | 138 |
| ALB.resultn   | >= | 2.875 TBILL.resultn   | =  | Missing                 |    | Missing     | -7.14E-05    | 138 |
| ALB.resultn   | >= | 2.875 TBILL.resultn   | <  | 1.25                    |    | Missing     | -0.000466254 | 138 |
| ALB.resultn   | >= | 2.875 TBILL.resultn   | >= | 1.25 PLT.resultn        | =  | Missing     | 0.001158782  | 138 |
| ALB.resultn   | >= | 2.875 TBILL.resultn   | >= | 1.25 PLT.resultn        | <  | 204.5       | 0.00474047   | 138 |
| ALB.resultn   | >= | 2.875 TBILL.resultn   | >= | 1.25 PLT.resultn        | >= | 204.5       | 0            | 138 |
| TBILL.resultn | =  | Missing               |    |                         |    |             | -0.002073992 | 139 |
| TBILL.resultn | <  | 1.95 age.yrs          | =  | Missing                 |    |             | -0.002533411 | 139 |
| TBILL.resultn | <  | 1.95 age.yrs          | <  | 63.01711157             |    |             | -0.002848447 | 139 |
| TBILL.resultn | <  | 1.95 age.yrs          | >= | 63.01711157             |    |             | 0            | 139 |
| TBILL.resultn | >= | 1.95 age.yrs          | =  | Missing                 |    |             | 0.002085392  | 139 |
| TBILL.resultn | >= | 1.95 age.yrs          | <  | 48.99247091             |    |             | -0.003183608 | 139 |
| TBILL.resultn | >= | 1.95 age.yrs          | >= | 48.99247091             |    |             | 0.008408191  | 139 |
| TBILL.resultn | =  | Missing               |    |                         |    | Missing     | -6.87E-06    | 140 |
| TBILL.resultn | <  | 2.75 psc.yrs.dur      | =  | Missing                 |    | Missing     | 0.000535923  | 140 |
| TBILL.resultn | <  | 2.75 psc.yrs.dur      | <  | 6.379192334             |    | Missing     | 0.000264982  | 140 |
| TBILL.resultn | <  | 2.75 psc.yrs.dur      | >= | 6.379192334 psc.yrs.dur | =  | Missing     | 0.002260916  | 140 |
| TBILL.resultn | <  | 2.75 psc.yrs.dur      | >= | 6.379192334 psc.yrs.dur | <  | 8.406570842 | 0.006782747  | 140 |
| TBILL.resultn | <  | 2.75 psc.yrs.dur      | >= | 6.379192334 psc.yrs.dur | >= | 8.406570842 | 0            | 140 |
| TBILL.resultn | >= | 2.75                  |    |                         |    | Missing     | 0.006910491  | 140 |
| ALB.resultn   | =  | Missing               |    |                         |    | Missing     | -0.00553993  | 141 |
| ALB.resultn   | <  | 2.95                  |    |                         |    | Missing     | 0.000258415  | 141 |
| ALB.resultn   | >= | 2.95 age.yrs          | =  | Missing                 |    | Missing     | -0.00513343  | 141 |
| ALB.resultn   | >= | 2.95 age.yrs          | <  | 56.10403833             |    | Missing     | -0.005710863 | 141 |
| ALB.resultn   | >= | 2.95 age.yrs          | >= | 56.10403833 AST.resultn | =  | Missing     | -0.00303256  | 141 |
| ALB.resultn   | >= | 2.95 age.yrs          | >= | 56.10403833 AST.resultn | <  | 50.5        | -0.00606512  | 141 |
| ALB.resultn   | >= | 2.95 age.yrs          | >= | 56.10403833 AST.resultn | >= | 50.5        | 0            | 141 |
| ALK.times.uln | =  | Missing TBILL.resultn | =  | Missing                 |    |             | 0            | 142 |
| ALK.times.uln | =  | Missing TBILL.resultn | <  | 0.95                    |    |             | 5.44E-06     | 142 |
| ALK.times.uln | =  | Missing TBILL.resultn | >= | 0.95                    |    |             | 0.003598104  | 142 |
| ALK.times.uln | <  | 6.02 TBILL.resultn    | =  | Missing                 |    |             | 0.00041768   | 142 |

|               |    |             |                |    |             |                |         |              |              |     |
|---------------|----|-------------|----------------|----|-------------|----------------|---------|--------------|--------------|-----|
| ALK.times.uln | <  | 6.02        | TBILL.resultn  | <  | 2.85        |                |         | 0.000265129  | 142          |     |
| ALK.times.uln | <  | 6.02        | TBILL.resultn  | >= | 2.85        |                |         | 0.002827981  | 142          |     |
| ALK.times.uln | >= | 6.02        |                |    |             |                |         | 0.006141402  | 142          |     |
| TBILL.resultn | =  | Missing     |                |    |             |                |         | 0.00286974   | 143          |     |
| TBILL.resultn | <  | 2.4         | Sodium.resultn | =  | Missing     |                |         | 0            | 143          |     |
| TBILL.resultn | <  | 2.4         | Sodium.resultn | <  | 136.5       |                |         | 0.002399617  | 143          |     |
| TBILL.resultn | <  | 2.4         | Sodium.resultn | >= | 136.5       |                |         | 0.000202753  | 143          |     |
| TBILL.resultn | >= | 2.4         | PLT.resultn    | =  | Missing     |                |         | 0.004210934  | 143          |     |
| TBILL.resultn | >= | 2.4         | PLT.resultn    | <  | 255         |                |         | 0.008640663  | 143          |     |
| TBILL.resultn | >= | 2.4         | PLT.resultn    | >= | 255         |                |         | -0.000218796 | 143          |     |
| ALB.resultn   | =  | Missing     |                |    |             |                |         | 4.24E-06     | 144          |     |
| ALB.resultn   | <  | 3.34        | TBILL.resultn  | =  | Missing     |                |         | 0.004554332  | 144          |     |
| ALB.resultn   | <  | 3.34        | TBILL.resultn  | <  | 1.31        |                |         | 0.001338801  | 144          |     |
| ALB.resultn   | <  | 3.34        | TBILL.resultn  | >= | 1.31        |                |         | 0.008734523  | 144          |     |
| ALB.resultn   | >= | 3.34        | ALK.times.uln  | =  | Missing     |                |         | 0            | 144          |     |
| ALB.resultn   | >= | 3.34        | ALK.times.uln  | <  | 6.02        |                |         | 0.000441735  | 144          |     |
| ALB.resultn   | >= | 3.34        | ALK.times.uln  | >= | 6.02        |                |         | 0.00404767   | 144          |     |
| AST.resultn   | =  | Missing     |                |    |             | Missing        |         | -0.013828134 | 145          |     |
| AST.resultn   | <  | 52.5        |                |    |             | Missing        |         | -0.013751457 | 145          |     |
| AST.resultn   | >= | 52.5        | age.yrs        | =  | Missing     | Missing        |         | -0.011451356 | 145          |     |
| AST.resultn   | >= | 52.5        | age.yrs        | <  | 51.66324435 | Missing        |         | -0.01288201  | 145          |     |
| AST.resultn   | >= | 52.5        | age.yrs        | >= | 51.66324435 | psc.yrs.dur    | =       | Missing      | -0.006882492 | 145 |
| AST.resultn   | >= | 52.5        | age.yrs        | >= | 51.66324435 | psc.yrs.dur    | <       | 0.657084189  | -0.012550427 | 145 |
| AST.resultn   | >= | 52.5        | age.yrs        | >= | 51.66324435 | psc.yrs.dur    | >=      | 0.657084189  | 0            | 145 |
| ALK.times.uln | =  | Missing     | ALB.resultn    | =  | Missing     |                | Missing | -0.004436502 | 146          |     |
| ALK.times.uln | =  | Missing     | ALB.resultn    | <  | 3.95        | age.yrs        | =       | Missing      | -0.00179798  | 146 |
| ALK.times.uln | =  | Missing     | ALB.resultn    | <  | 3.95        | age.yrs        | <       | 53.32648871  | -0.003432508 | 146 |
| ALK.times.uln | =  | Missing     | ALB.resultn    | <  | 3.95        | age.yrs        | >=      | 53.32648871  | 0            | 146 |
| ALK.times.uln | =  | Missing     | ALB.resultn    | >= | 3.95        |                | Missing | -0.00443794  | 146          |     |
| ALK.times.uln | <  | 5.857962963 |                |    |             |                | Missing | -0.003766273 | 146          |     |
| ALK.times.uln | >= | 5.857962963 |                |    |             |                | Missing | -0.000129111 | 146          |     |
| ALB.resultn   | =  | Missing     |                |    |             |                | Missing | 0.000483035  | 147          |     |
| ALB.resultn   | <  | 3.05        |                |    |             |                | Missing | 0.006179797  | 147          |     |
| ALB.resultn   | >= | 3.05        | PLT.resultn    | =  | Missing     |                | Missing | 0.000446487  | 147          |     |
| ALB.resultn   | >= | 3.05        | PLT.resultn    | <  | 206.5       |                | Missing | 0.002800386  | 147          |     |
| ALB.resultn   | >= | 3.05        | PLT.resultn    | >= | 206.5       | Sodium.resultn | =       | Missing      | 0            | 147 |
| ALB.resultn   | >= | 3.05        | PLT.resultn    | >= | 206.5       | Sodium.resultn | <       | 136.5        | 0.004346339  | 147 |
| ALB.resultn   | >= | 3.05        | PLT.resultn    | >= | 206.5       | Sodium.resultn | >=      | 136.5        | -0.000277232 | 147 |
| ALB.resultn   | =  | Missing     |                |    |             |                | Missing | 2.85E-05     | 148          |     |
| ALB.resultn   | <  | 2.825       |                |    |             |                | Missing | 0.009574583  | 148          |     |
| ALB.resultn   | >= | 2.825       | psc.yrs.dur    | =  | Missing     |                | Missing | 0.000854642  | 148          |     |
| ALB.resultn   | >= | 2.825       | psc.yrs.dur    | <  | 13.35523614 | PLT.resultn    | =       | Missing      | 0            | 148 |
| ALB.resultn   | >= | 2.825       | psc.yrs.dur    | <  | 13.35523614 | PLT.resultn    | <       | 183.5        | 0.003176515  | 148 |
| ALB.resultn   | >= | 2.825       | psc.yrs.dur    | <  | 13.35523614 | PLT.resultn    | >=      | 183.5        | 0.000423476  | 148 |
| ALB.resultn   | >= | 2.825       | psc.yrs.dur    | >= | 13.35523614 |                | Missing | 0.006429076  | 148          |     |
| ALB.resultn   | =  | Missing     |                |    |             |                |         | -0.000226146 | 149          |     |
| ALB.resultn   | <  | 3.225       | TBILL.resultn  | =  | Missing     |                |         | 0.006664494  | 149          |     |
| ALB.resultn   | <  | 3.225       | TBILL.resultn  | <  | 1.21        |                |         | 0.000665785  | 149          |     |
| ALB.resultn   | <  | 3.225       | TBILL.resultn  | >= | 1.21        |                |         | 0.013263074  | 149          |     |
| ALB.resultn   | >= | 3.225       | PLT.resultn    | =  | Missing     |                |         | 0            | 149          |     |
| ALB.resultn   | >= | 3.225       | PLT.resultn    | <  | 209.5       |                |         | 0.001402412  | 149          |     |
| ALB.resultn   | >= | 3.225       | PLT.resultn    | >= | 209.5       |                |         | -0.000515149 | 149          |     |
| ALB.resultn   | =  | Missing     |                |    |             |                | Missing | -0.003493546 | 150          |     |
| ALB.resultn   | <  | 3.13        |                |    |             |                | Missing | 0.001115788  | 150          |     |
| ALB.resultn   | >= | 3.13        | ALK.times.uln  | =  | Missing     | TBILL.resultn  | =       | Missing      | -0.002704651 | 150 |
| ALB.resultn   | >= | 3.13        | ALK.times.uln  | =  | Missing     | TBILL.resultn  | <       | 1.1          | -0.003500137 | 150 |
| ALB.resultn   | >= | 3.13        | ALK.times.uln  | =  | Missing     | TBILL.resultn  | >=      | 1.1          | 0            | 150 |
| ALB.resultn   | >= | 3.13        | ALK.times.uln  | <  | 5.438574341 |                | Missing | -0.002955177 | 150          |     |
| ALB.resultn   | >= | 3.13        | ALK.times.uln  | >= | 5.438574341 |                | Missing | -0.000256699 | 150          |     |
| ALB.resultn   | =  | Missing     |                |    |             |                |         | 1.30E-05     | 151          |     |
| ALB.resultn   | <  | 3.105       | TBILL.resultn  | =  | Missing     |                |         | 0.00441109   | 151          |     |
| ALB.resultn   | <  | 3.105       | TBILL.resultn  | <  | 1.31        |                |         | 0.002444914  | 151          |     |

|               |    |         |                |    |             |                |         |              |              |     |
|---------------|----|---------|----------------|----|-------------|----------------|---------|--------------|--------------|-----|
| ALB.resultn   | <  | 3.105   | TBILL.resultn  | >= | 1.31        |                |         | 0.006377267  | 151          |     |
| ALB.resultn   | >= | 3.105   | PLT.resultn    | =  | Missing     |                |         | 0            | 151          |     |
| ALB.resultn   | >= | 3.105   | PLT.resultn    | <  | 206.5       |                |         | 0.00198767   | 151          |     |
| ALB.resultn   | >= | 3.105   | PLT.resultn    | >= | 206.5       |                |         | 0.000411218  | 151          |     |
| TBILL.resultn | =  | Missing |                |    |             |                |         | 3.52E-05     | 152          |     |
| TBILL.resultn | <  | 1.65    | Sodium.resultn | =  | Missing     |                |         | 0            | 152          |     |
| TBILL.resultn | <  | 1.65    | Sodium.resultn | <  | 136.5       |                |         | 0.004737102  | 152          |     |
| TBILL.resultn | <  | 1.65    | Sodium.resultn | >= | 136.5       |                |         | 0.000724998  | 152          |     |
| TBILL.resultn | >= | 1.65    | PLT.resultn    | =  | Missing     |                |         | 0.003502611  | 152          |     |
| TBILL.resultn | >= | 1.65    | PLT.resultn    | <  | 209         |                |         | 0.00803754   | 152          |     |
| TBILL.resultn | >= | 1.65    | PLT.resultn    | >= | 209         |                |         | 0.000731265  | 152          |     |
| ALB.resultn   | =  | Missing |                |    |             |                |         | -0.001341169 | 153          |     |
| ALB.resultn   | <  | 3.225   | TBILL.resultn  | =  | Missing     |                |         | 0.002321476  | 153          |     |
| ALB.resultn   | <  | 3.225   | TBILL.resultn  | <  | 1.5         |                |         | -0.000578523 | 153          |     |
| ALB.resultn   | <  | 3.225   | TBILL.resultn  | >= | 1.5         |                |         | 0.005221474  | 153          |     |
| ALB.resultn   | >= | 3.225   | age.yrs        | =  | Missing     |                |         | -0.001211485 | 153          |     |
| ALB.resultn   | >= | 3.225   | age.yrs        | <  | 52.90485969 |                |         | -0.001722451 | 153          |     |
| ALB.resultn   | >= | 3.225   | age.yrs        | >= | 52.90485969 |                |         | 0            | 153          |     |
| TBILL.resultn | =  | Missing |                |    |             | Missing        |         | -0.002780303 | 154          |     |
| TBILL.resultn | <  | 1.55    |                |    |             | Missing        |         | -0.003180123 | 154          |     |
| TBILL.resultn | >= | 1.55    | age.yrs        | =  | Missing     |                |         | 0.000209673  | 154          |     |
| TBILL.resultn | >= | 1.55    | age.yrs        | <  | 54.56947296 | AST.resultn    | =       | Missing      | -0.001996678 | 154 |
| TBILL.resultn | >= | 1.55    | age.yrs        | <  | 54.56947296 | AST.resultn    | <       | 111.5        | -0.003618979 | 154 |
| TBILL.resultn | >= | 1.55    | age.yrs        | <  | 54.56947296 | AST.resultn    | >=      | 111.5        | 0            | 154 |
| TBILL.resultn | >= | 1.55    | age.yrs        | >= | 54.56947296 |                | Missing | 0.006026417  | 154          |     |
| TBILL.resultn | =  | Missing |                |    |             |                |         | 0.001943599  | 155          |     |
| TBILL.resultn | <  | 2.35    | Sodium.resultn | =  | Missing     |                |         | 0            | 155          |     |
| TBILL.resultn | <  | 2.35    | Sodium.resultn | <  | 136.5       |                |         | 0.002873449  | 155          |     |
| TBILL.resultn | <  | 2.35    | Sodium.resultn | >= | 136.5       |                |         | 0.000646316  | 155          |     |
| TBILL.resultn | >= | 2.35    | ALB.resultn    | =  | Missing     |                |         | 0.003287587  | 155          |     |
| TBILL.resultn | >= | 2.35    | ALB.resultn    | <  | 3.41        |                |         | 0.006712302  | 155          |     |
| TBILL.resultn | >= | 2.35    | ALB.resultn    | >= | 3.41        |                |         | 0.000841361  | 155          |     |
| ALB.resultn   | =  | Missing |                |    |             |                |         | 9.01E-06     | 156          |     |
| ALB.resultn   | <  | 3.135   | age.yrs        | =  | Missing     |                |         | 0.004366372  | 156          |     |
| ALB.resultn   | <  | 3.135   | age.yrs        | <  | 47.31143053 |                |         | 0.001088734  | 156          |     |
| ALB.resultn   | <  | 3.135   | age.yrs        | >= | 47.31143053 |                |         | 0.007971774  | 156          |     |
| ALB.resultn   | >= | 3.135   | Sodium.resultn | =  | Missing     |                |         | 0            | 156          |     |
| ALB.resultn   | >= | 3.135   | Sodium.resultn | <  | 136.5       |                |         | 0.005052224  | 156          |     |
| ALB.resultn   | >= | 3.135   | Sodium.resultn | >= | 136.5       |                |         | 0.000755261  | 156          |     |
| ALB.resultn   | =  | Missing |                |    |             | Missing        |         | -0.000318009 | 157          |     |
| ALB.resultn   | <  | 2.825   |                |    |             | Missing        |         | 0.00722547   | 157          |     |
| ALB.resultn   | >= | 2.825   | TBILL.resultn  | =  | Missing     |                |         | 0.000391812  | 157          |     |
| ALB.resultn   | >= | 2.825   | TBILL.resultn  | <  | 2.05        | Sodium.resultn | =       | Missing      | 0            | 157 |
| ALB.resultn   | >= | 2.825   | TBILL.resultn  | <  | 2.05        | Sodium.resultn | <       | 137.5        | 0.002081516  | 157 |
| ALB.resultn   | >= | 2.825   | TBILL.resultn  | <  | 2.05        | Sodium.resultn | >=      | 137.5        | -0.000109659 | 157 |
| ALB.resultn   | >= | 2.825   | TBILL.resultn  | >= | 2.05        |                |         | Missing      | 0.002812561  | 157 |
| ALB.resultn   | =  | Missing |                |    |             |                |         | Missing      | -0.000662788 | 158 |
| ALB.resultn   | <  | 2.95    |                |    |             |                |         | Missing      | 0.009057411  | 158 |
| ALB.resultn   | >= | 2.95    | TBILL.resultn  | =  | Missing     |                |         | Missing      | -1.33E-05    | 158 |
| ALB.resultn   | >= | 2.95    | TBILL.resultn  | <  | 0.75        |                |         | Missing      | -0.000662786 | 158 |
| ALB.resultn   | >= | 2.95    | TBILL.resultn  | >= | 0.75        | PLT.resultn    | =       | Missing      | 0.000636183  | 158 |
| ALB.resultn   | >= | 2.95    | TBILL.resultn  | >= | 0.75        | PLT.resultn    | <       | 210          | 0.002141818  | 158 |
| ALB.resultn   | >= | 2.95    | TBILL.resultn  | >= | 0.75        | PLT.resultn    | >=      | 210          | 0            | 158 |
| ALB.resultn   | =  | Missing |                |    |             |                |         | Missing      | -0.00745751  | 159 |
| ALB.resultn   | <  | 3.13    |                |    |             |                |         | Missing      | -0.001695459 | 159 |
| ALB.resultn   | >= | 3.13    | TBILL.resultn  | =  | Missing     |                |         | Missing      | -0.006813616 | 159 |
| ALB.resultn   | >= | 3.13    | TBILL.resultn  | <  | 1.15        |                |         | Missing      | -0.007265759 | 159 |
| ALB.resultn   | >= | 3.13    | TBILL.resultn  | >= | 1.15        | ALK.times.uln  | =       | Missing      | 0            | 159 |
| ALB.resultn   | >= | 3.13    | TBILL.resultn  | >= | 1.15        | ALK.times.uln  | <       | 5.001992032  | -0.007508745 | 159 |
| ALB.resultn   | >= | 3.13    | TBILL.resultn  | >= | 1.15        | ALK.times.uln  | >=      | 5.001992032  | -0.00491602  | 159 |
| TBILL.resultn | =  | Missing |                |    |             |                |         |              | -0.003820519 | 160 |
| TBILL.resultn | <  | 2.65    | age.yrs        | =  | Missing     |                |         |              | -0.004177835 | 160 |

|               |    |                       |    |                         |    |             |              |     |
|---------------|----|-----------------------|----|-------------------------|----|-------------|--------------|-----|
| TBILL.resultn | <  | 2.65 age.yrs          | <  | 68.66119097             |    |             | -0.004378692 | 160 |
| TBILL.resultn | <  | 2.65 age.yrs          | >= | 68.66119097             |    |             | 0            | 160 |
| TBILL.resultn | >= | 2.65 psc.yrs.dur      | =  | Missing                 |    |             | -6.47E-05    | 160 |
| TBILL.resultn | >= | 2.65 psc.yrs.dur      | <  | 1.854893908             |    |             | -0.004813161 | 160 |
| TBILL.resultn | >= | 2.65 psc.yrs.dur      | >= | 1.854893908             |    |             | 0.004683683  | 160 |
| TBILL.resultn | =  | Missing               |    |                         |    |             | 2.31E-05     | 161 |
| TBILL.resultn | <  | 2.45 AST.resultn      | =  | Missing                 |    |             | -0.000430103 | 161 |
| TBILL.resultn | <  | 2.45 AST.resultn      | <  | 43                      |    |             | -0.001048067 | 161 |
| TBILL.resultn | <  | 2.45 AST.resultn      | >= | 43                      |    |             | 0            | 161 |
| TBILL.resultn | >= | 2.45 PLT.resultn      | =  | Missing                 |    |             | 0.00251498   | 161 |
| TBILL.resultn | >= | 2.45 PLT.resultn      | <  | 209                     |    |             | 0.006599152  | 161 |
| TBILL.resultn | >= | 2.45 PLT.resultn      | >= | 209                     |    |             | -0.000402285 | 161 |
| TBILL.resultn | =  | Missing               |    |                         |    |             | 0.001302331  | 162 |
| TBILL.resultn | <  | 1.65 Sodium.resultn   | =  | Missing                 |    |             | 0            | 162 |
| TBILL.resultn | <  | 1.65 Sodium.resultn   | <  | 136.5                   |    |             | 0.003047659  | 162 |
| TBILL.resultn | <  | 1.65 Sodium.resultn   | >= | 136.5                   |    |             | 0.000365178  | 162 |
| TBILL.resultn | >= | 1.65 ALB.resultn      | =  | Missing                 |    |             | 0.004073882  | 162 |
| TBILL.resultn | >= | 1.65 ALB.resultn      | <  | 3.35                    |    |             | 0.01001906   | 162 |
| TBILL.resultn | >= | 1.65 ALB.resultn      | >= | 3.35                    |    |             | 0.001489022  | 162 |
| ALB.resultn   | =  | Missing               |    |                         |    | Missing     | -0.004580995 | 163 |
| ALB.resultn   | <  | 3.13                  |    |                         |    | Missing     | 0.000401873  | 163 |
| ALB.resultn   | >= | 3.13 TBILL.resultn    | =  | Missing                 |    | Missing     | -0.004502519 | 163 |
| ALB.resultn   | >= | 3.13 TBILL.resultn    | <  | 0.95                    |    | Missing     | -0.004938464 | 163 |
| ALB.resultn   | >= | 3.13 TBILL.resultn    | >= | 0.95 psc.yrs.dur        | =  | Missing     | -0.003686681 | 163 |
| ALB.resultn   | >= | 3.13 TBILL.resultn    | >= | 0.95 psc.yrs.dur        | <  | 7.196440794 | -0.004301127 | 163 |
| ALB.resultn   | >= | 3.13 TBILL.resultn    | >= | 0.95 psc.yrs.dur        | >= | 7.196440794 | 0            | 163 |
| ALK.times.uln | =  | Missing TBILL.resultn | =  | Missing                 |    | Missing     | -0.008471519 | 164 |
| ALK.times.uln | =  | Missing TBILL.resultn | <  | 0.75                    |    | Missing     | -0.008476416 | 164 |
| ALK.times.uln | =  | Missing TBILL.resultn | >= | 0.75 age.yrs            | =  | Missing     | -0.004243583 | 164 |
| ALK.times.uln | =  | Missing TBILL.resultn | >= | 0.75 age.yrs            | <  | 52.89938398 | -0.008487165 | 164 |
| ALK.times.uln | =  | Missing TBILL.resultn | >= | 0.75 age.yrs            | >= | 52.89938398 | 0            | 164 |
| ALK.times.uln | <  | 5.85                  |    |                         |    | Missing     | -0.008155967 | 164 |
| ALK.times.uln | >= | 5.85                  |    |                         |    | Missing     | -0.00278599  | 164 |
| ALB.resultn   | =  | Missing               |    |                         |    | Missing     | -0.005675483 | 165 |
| ALB.resultn   | <  | 3.105                 |    |                         |    | Missing     | -0.002992175 | 165 |
| ALB.resultn   | >= | 3.105 psc.yrs.dur     | =  | Missing                 |    | Missing     | -0.005615653 | 165 |
| ALB.resultn   | >= | 3.105 psc.yrs.dur     | <  | 6.262833676             |    | Missing     | -0.006030096 | 165 |
| ALB.resultn   | >= | 3.105 psc.yrs.dur     | >= | 6.262833676 AST.resultn | =  | Missing     | -0.003211885 | 165 |
| ALB.resultn   | >= | 3.105 psc.yrs.dur     | >= | 6.262833676 AST.resultn | <  | 47.5        | -0.006423771 | 165 |
| ALB.resultn   | >= | 3.105 psc.yrs.dur     | >= | 6.262833676 AST.resultn | >= | 47.5        | 0            | 165 |
| ALB.resultn   | =  | Missing               |    |                         |    |             | -0.001367536 | 166 |
| ALB.resultn   | <  | 3.33 PLT.resultn      | =  | Missing                 |    |             | 0.005491788  | 166 |
| ALB.resultn   | <  | 3.33 PLT.resultn      | <  | 272                     |    |             | 0.010730883  | 166 |
| ALB.resultn   | <  | 3.33 PLT.resultn      | >= | 272                     |    |             | 0.000252694  | 166 |
| ALB.resultn   | >= | 3.33 TBILL.resultn    | =  | Missing                 |    |             | -0.001825281 | 166 |
| ALB.resultn   | >= | 3.33 TBILL.resultn    | <  | 2.05                    |    |             | -0.001957685 | 166 |
| ALB.resultn   | >= | 3.33 TBILL.resultn    | >= | 2.05                    |    |             | 0            | 166 |
| TBILL.resultn | =  | Missing               |    |                         |    |             | -0.000775483 | 167 |
| TBILL.resultn | <  | 1.9 AST.resultn       | =  | Missing                 |    |             | -0.000660434 | 167 |
| TBILL.resultn | <  | 1.9 AST.resultn       | <  | 54.5                    |    |             | -0.001252332 | 167 |
| TBILL.resultn | <  | 1.9 AST.resultn       | >= | 54.5                    |    |             | 0            | 167 |
| TBILL.resultn | >= | 1.9 age.yrs           | =  | Missing                 |    |             | 0.002191033  | 167 |
| TBILL.resultn | >= | 1.9 age.yrs           | <  | 48.73511294             |    |             | -0.000118546 | 167 |
| TBILL.resultn | >= | 1.9 age.yrs           | >= | 48.73511294             |    |             | 0.005033592  | 167 |
| ALB.resultn   | =  | Missing               |    |                         |    | Missing     | 2.57E-06     | 168 |
| ALB.resultn   | <  | 3.13                  |    |                         |    | Missing     | 0.005449016  | 168 |
| ALB.resultn   | >= | 3.13 TBILL.resultn    | =  | Missing                 |    | Missing     | 0.000567622  | 168 |
| ALB.resultn   | >= | 3.13 TBILL.resultn    | <  | 2.35 Sodium.resultn     | =  | Missing     | 0            | 168 |
| ALB.resultn   | >= | 3.13 TBILL.resultn    | <  | 2.35 Sodium.resultn     | <  | 137.5       | 0.002809855  | 168 |
| ALB.resultn   | >= | 3.13 TBILL.resultn    | <  | 2.35 Sodium.resultn     | >= | 137.5       | -4.53E-06    | 168 |
| ALB.resultn   | >= | 3.13 TBILL.resultn    | >= | 2.35                    |    | Missing     | 0.003526899  | 168 |
| ALB.resultn   | =  | Missing               |    |                         |    | Missing     | -0.006591565 | 169 |

|               |    |                     |    |                           |         |              |              |     |
|---------------|----|---------------------|----|---------------------------|---------|--------------|--------------|-----|
| ALB.resultn   | <  | 2.95                |    |                           | Missing | -0.000605146 | 169          |     |
| ALB.resultn   | >= | 2.95 psc.yrs.dur    | =  | Missing                   | Missing | -0.006372482 | 169          |     |
| ALB.resultn   | >= | 2.95 psc.yrs.dur    | <  | 8.026009582               | Missing | -0.006662853 | 169          |     |
| ALB.resultn   | >= | 2.95 psc.yrs.dur    | >= | 8.026009582 TBILI.resultn | =       | Missing      | -0.003541365 | 169 |
| ALB.resultn   | >= | 2.95 psc.yrs.dur    | >= | 8.026009582 TBILI.resultn | <       | 0.95         | -0.007082729 | 169 |
| ALB.resultn   | >= | 2.95 psc.yrs.dur    | >= | 8.026009582 TBILI.resultn | >=      | 0.95         | 0            | 169 |
| TBILI.resultn | =  | Missing             |    |                           |         | -0.000222566 | 170          |     |
| TBILI.resultn | <  | 1.95 age.yrs        | =  | Missing                   |         | -0.001106913 | 170          |     |
| TBILI.resultn | <  | 1.95 age.yrs        | <  | 53.33470226               |         | -0.001506829 | 170          |     |
| TBILI.resultn | <  | 1.95 age.yrs        | >= | 53.33470226               |         | 0            | 170          |     |
| TBILI.resultn | >= | 1.95 PLT.resultn    | =  | Missing                   |         | 0.002306522  | 170          |     |
| TBILI.resultn | >= | 1.95 PLT.resultn    | <  | 220                       |         | 0.004690713  | 170          |     |
| TBILI.resultn | >= | 1.95 PLT.resultn    | >= | 220                       |         | 0.000717062  | 170          |     |
| TBILI.resultn | =  | Missing             |    |                           |         | 0.00101204   | 171          |     |
| TBILI.resultn | <  | 2.35 PLT.resultn    | =  | Missing                   |         | 0            | 171          |     |
| TBILI.resultn | <  | 2.35 PLT.resultn    | <  | 185.5                     |         | 0.003525908  | 171          |     |
| TBILI.resultn | <  | 2.35 PLT.resultn    | >= | 185.5                     |         | -0.000333471 | 171          |     |
| TBILI.resultn | >= | 2.35 age.yrs        | =  | Missing                   |         | 0.005904104  | 171          |     |
| TBILI.resultn | >= | 2.35 age.yrs        | <  | 43.09787817               |         | 0.001855138  | 171          |     |
| TBILI.resultn | >= | 2.35 age.yrs        | >= | 43.09787817               |         | 0.011167758  | 171          |     |
| TBILI.resultn | =  | Missing             |    |                           |         | 0.000412056  | 172          |     |
| TBILI.resultn | <  | 1.65 ALK.times.uln  | =  | Missing                   |         | 0            | 172          |     |
| TBILI.resultn | <  | 1.65 ALK.times.uln  | <  | 5.963877551               |         | -0.000766734 | 172          |     |
| TBILI.resultn | <  | 1.65 ALK.times.uln  | >= | 5.963877551               |         | 0.00144864   | 172          |     |
| TBILI.resultn | >= | 1.65 age.yrs        | =  | Missing                   |         | 0.002572933  | 172          |     |
| TBILI.resultn | >= | 1.65 age.yrs        | <  | 51.10746064               |         | 0.000373164  | 172          |     |
| TBILI.resultn | >= | 1.65 age.yrs        | >= | 51.10746064               |         | 0.006343966  | 172          |     |
| ALK.times.uln | =  | Missing AST.resultn | =  | Missing                   |         | -0.001910825 | 173          |     |
| ALK.times.uln | =  | Missing AST.resultn | <  | 64.5                      |         | -0.003290866 | 173          |     |
| ALK.times.uln | =  | Missing AST.resultn | >= | 64.5                      |         | 0            | 173          |     |
| ALK.times.uln | <  | 6.02 TBILI.resultn  | =  | Missing                   |         | -0.002804502 | 173          |     |
| ALK.times.uln | <  | 6.02 TBILI.resultn  | <  | 2.75                      |         | -0.003029463 | 173          |     |
| ALK.times.uln | <  | 6.02 TBILI.resultn  | >= | 2.75                      |         | 0.000839873  | 173          |     |
| ALK.times.uln | >= | 6.02                |    |                           |         | 0.001062686  | 173          |     |
| ALB.resultn   | =  | Missing             |    |                           |         | -0.000741919 | 174          |     |
| ALB.resultn   | <  | 3.345 TBILI.resultn | =  | Missing                   |         | 0.003465513  | 174          |     |
| ALB.resultn   | <  | 3.345 TBILI.resultn | <  | 1.85                      |         | 0.001205143  | 174          |     |
| ALB.resultn   | <  | 3.345 TBILI.resultn | >= | 1.85                      |         | 0.007986253  | 174          |     |
| ALB.resultn   | >= | 3.345 ALK.times.uln | =  | Missing                   |         | 0            | 174          |     |
| ALB.resultn   | >= | 3.345 ALK.times.uln | <  | 5.462893197               |         | -0.000558992 | 174          |     |
| ALB.resultn   | >= | 3.345 ALK.times.uln | >= | 5.462893197               |         | 0.002111091  | 174          |     |
| ALB.resultn   | =  | Missing             |    |                           |         | 0.000313268  | 175          |     |
| ALB.resultn   | <  | 3.33 psc.yrs.dur    | =  | Missing                   |         | 0.004875416  | 175          |     |
| ALB.resultn   | <  | 3.33 psc.yrs.dur    | <  | 5.980835044               |         | 0.000217725  | 175          |     |
| ALB.resultn   | <  | 3.33 psc.yrs.dur    | >= | 5.980835044               |         | 0.009998876  | 175          |     |
| ALB.resultn   | >= | 3.33 ALK.times.uln  | =  | Missing                   |         | 0            | 175          |     |
| ALB.resultn   | >= | 3.33 ALK.times.uln  | <  | 5.462893197               |         | -0.000380933 | 175          |     |
| ALB.resultn   | >= | 3.33 ALK.times.uln  | >= | 5.462893197               |         | 0.002628542  | 175          |     |
| ALB.resultn   | =  | Missing             |    |                           | Missing | -0.008288325 | 176          |     |
| ALB.resultn   | <  | 2.95                |    |                           | Missing | -0.002550856 | 176          |     |
| ALB.resultn   | >= | 2.95 TBILI.resultn  | =  | Missing                   | Missing | -0.007970202 | 176          |     |
| ALB.resultn   | >= | 2.95 TBILI.resultn  | <  | 1.31                      | Missing | -0.008462989 | 176          |     |
| ALB.resultn   | >= | 2.95 TBILI.resultn  | >= | 1.31 psc.yrs.dur          | =       | Missing      | -0.006208754 | 176 |
| ALB.resultn   | >= | 2.95 TBILI.resultn  | >= | 1.31 psc.yrs.dur          | <       | 5.900068446  | -0.007886795 | 176 |
| ALB.resultn   | >= | 2.95 TBILI.resultn  | >= | 1.31 psc.yrs.dur          | >=      | 5.900068446  | 0            | 176 |
| TBILI.resultn | =  | Missing             |    |                           |         | 1.60E-05     | 177          |     |
| TBILI.resultn | <  | 2.35 Sodium.resultn | =  | Missing                   |         | 0            | 177          |     |
| TBILI.resultn | <  | 2.35 Sodium.resultn | <  | 136.5                     |         | 0.003302816  | 177          |     |
| TBILI.resultn | <  | 2.35 Sodium.resultn | >= | 136.5                     |         | 0.000627962  | 177          |     |
| TBILI.resultn | >= | 2.35 PLT.resultn    | =  | Missing                   |         | 0.003970389  | 177          |     |
| TBILI.resultn | >= | 2.35 PLT.resultn    | <  | 215                       |         | 0.00855089   | 177          |     |
| TBILI.resultn | >= | 2.35 PLT.resultn    | >= | 215                       |         | 0.001275977  | 177          |     |

|               |    |                         |    |         |                     |         |              |              |     |
|---------------|----|-------------------------|----|---------|---------------------|---------|--------------|--------------|-----|
| TBILI.resultn | =  | Missing                 |    |         |                     | Missing | -0.010854536 | 178          |     |
| TBILI.resultn | <  | 0.95                    |    |         |                     | Missing | -0.011602435 | 178          |     |
| TBILI.resultn | >= | 0.95 Hemoglobin.resultn | =  | Missing | age.yrs             | =       | Missing      | -0.004346597 | 178 |
| TBILI.resultn | >= | 0.95 Hemoglobin.resultn | =  | Missing | age.yrs             | <       | 48.92128679  | -0.009127854 | 178 |
| TBILI.resultn | >= | 0.95 Hemoglobin.resultn | =  | Missing | age.yrs             | >=      | 48.92128679  | 0            | 178 |
| TBILI.resultn | >= | 0.95 Hemoglobin.resultn | <  |         | 13.35               | Missing | -0.009448171 | 178          |     |
| TBILI.resultn | >= | 0.95 Hemoglobin.resultn | >= |         | 13.35               | Missing | -0.01152961  | 178          |     |
| ALB.resultn   | =  | Missing                 |    |         |                     |         | -0.00163507  | 179          |     |
| ALB.resultn   | <  | 3.225 age.yrs           | =  | Missing |                     |         | 0.000222865  | 179          |     |
| ALB.resultn   | <  | 3.225 age.yrs           | <  |         | 52.05065024         |         | -0.002296786 | 179          |     |
| ALB.resultn   | <  | 3.225 age.yrs           | >= |         | 52.05065024         |         | 0.00349841   | 179          |     |
| ALB.resultn   | >= | 3.225 psc.yrs.dur       | =  | Missing |                     |         | -0.002406008 | 179          |     |
| ALB.resultn   | >= | 3.225 psc.yrs.dur       | <  |         | 6.324435318         |         | -0.002753542 | 179          |     |
| ALB.resultn   | >= | 3.225 psc.yrs.dur       | >= |         | 6.324435318         |         | 0            | 179          |     |
| ALB.resultn   | =  | Missing                 |    |         |                     | Missing | 0.000597515  | 180          |     |
| ALB.resultn   | <  | 2.965                   |    |         |                     | Missing | 0.005078893  | 180          |     |
| ALB.resultn   | >= | 2.965 PLT.resultn       | =  | Missing |                     | Missing | 0.000877757  | 180          |     |
| ALB.resultn   | >= | 2.965 PLT.resultn       | <  |         | 182.5               | Missing | 0.007092676  | 180          |     |
| ALB.resultn   | >= | 2.965 PLT.resultn       | >= |         | 182.5 ALB.resultn   | =       | Missing      | 0.000321915  | 180 |
| ALB.resultn   | >= | 2.965 PLT.resultn       | >= |         | 182.5 ALB.resultn   | <       | 3.66         | 0.001437389  | 180 |
| ALB.resultn   | >= | 2.965 PLT.resultn       | >= |         | 182.5 ALB.resultn   | >=      | 3.66         | 0            | 180 |
| ALB.resultn   | =  | Missing                 |    |         |                     | Missing | -0.006062624 | 181          |     |
| ALB.resultn   | <  | 3.245                   |    |         |                     | Missing | -0.002228469 | 181          |     |
| ALB.resultn   | >= | 3.245 Sodium.resultn    | =  | Missing |                     | Missing | -0.006681092 | 181          |     |
| ALB.resultn   | >= | 3.245 Sodium.resultn    | <  |         | 137.5 psc.yrs.dur   | =       | Missing      | -0.004005414 | 181 |
| ALB.resultn   | >= | 3.245 Sodium.resultn    | <  |         | 137.5 psc.yrs.dur   | <       | 1.23613963   | -0.007086501 | 181 |
| ALB.resultn   | >= | 3.245 Sodium.resultn    | <  |         | 137.5 psc.yrs.dur   | >=      | 1.23613963   | 0            | 181 |
| ALB.resultn   | >= | 3.245 Sodium.resultn    | >= |         | 137.5               | Missing | -0.00684005  | 181          |     |
| ALB.resultn   | =  | Missing                 |    |         |                     | Missing | -0.00700459  | 182          |     |
| ALB.resultn   | <  | 3.105                   |    |         |                     | Missing | -0.002375032 | 182          |     |
| ALB.resultn   | >= | 3.105 PLT.resultn       | =  | Missing |                     | Missing | -0.007013066 | 182          |     |
| ALB.resultn   | >= | 3.105 PLT.resultn       | <  |         | 197.5 TBILI.resultn | =       | Missing      | -0.003738741 | 182 |
| ALB.resultn   | >= | 3.105 PLT.resultn       | <  |         | 197.5 TBILI.resultn | <       | 1.15         | -0.005938001 | 182 |
| ALB.resultn   | >= | 3.105 PLT.resultn       | <  |         | 197.5 TBILI.resultn | >=      | 1.15         | 0            | 182 |
| ALB.resultn   | >= | 3.105 PLT.resultn       | >= |         | 197.5               | Missing | -0.00644357  | 182          |     |
| ALB.resultn   | =  | Missing                 |    |         |                     |         | -0.00022859  | 183          |     |
| ALB.resultn   | <  | 3.345 TBILI.resultn     | =  | Missing |                     |         | 0.002608547  | 183          |     |
| ALB.resultn   | <  | 3.345 TBILI.resultn     | <  |         | 1.6                 |         | -0.000211643 | 183          |     |
| ALB.resultn   | <  | 3.345 TBILI.resultn     | >= |         | 1.6                 |         | 0.007479785  | 183          |     |
| ALB.resultn   | >= | 3.345 TBILI.resultn     | =  | Missing |                     |         | -0.000522726 | 183          |     |
| ALB.resultn   | >= | 3.345 TBILI.resultn     | <  |         | 0.75                |         | -0.001072678 | 183          |     |
| ALB.resultn   | >= | 3.345 TBILI.resultn     | >= |         | 0.75                |         | 0            | 183          |     |
| ALB.resultn   | =  | Missing                 |    |         |                     | Missing | -0.004406306 | 184          |     |
| ALB.resultn   | <  | 2.915                   |    |         |                     | Missing | 0.001977308  | 184          |     |
| ALB.resultn   | >= | 2.915 TBILI.resultn     | =  | Missing |                     | Missing | -0.004122428 | 184          |     |
| ALB.resultn   | >= | 2.915 TBILI.resultn     | <  |         | 0.85                | Missing | -0.004869034 | 184          |     |
| ALB.resultn   | >= | 2.915 TBILI.resultn     | >= |         | 0.85 age.yrs        | =       | Missing      | -0.003126954 | 184 |
| ALB.resultn   | >= | 2.915 TBILI.resultn     | >= |         | 0.85 age.yrs        | <       | 53.46475017  | -0.004264028 | 184 |
| ALB.resultn   | >= | 2.915 TBILI.resultn     | >= |         | 0.85 age.yrs        | >=      | 53.46475017  | 0            | 184 |
| TBILI.resultn | =  | Missing                 |    |         |                     |         | -0.000953639 | 185          |     |
| TBILI.resultn | <  | 1.95 ALK.times.uln      | =  | Missing |                     |         | 0            | 185          |     |
| TBILI.resultn | <  | 1.95 ALK.times.uln      | <  |         | 5.20390417          |         | -0.000830836 | 185          |     |
| TBILI.resultn | <  | 1.95 ALK.times.uln      | >= |         | 5.20390417          |         | 0.002487665  | 185          |     |
| TBILI.resultn | >= | 1.95 ALB.resultn        | =  | Missing |                     |         | 0.003366925  | 185          |     |
| TBILI.resultn | >= | 1.95 ALB.resultn        | <  |         | 3.35                |         | 0.007550329  | 185          |     |
| TBILI.resultn | >= | 1.95 ALB.resultn        | >= |         | 3.35                |         | 0.001042812  | 185          |     |
| ALB.resultn   | =  | Missing                 |    |         |                     |         | -0.001538201 | 186          |     |
| ALB.resultn   | <  | 3.31 TBILI.resultn      | =  | Missing |                     |         | 0.001466253  | 186          |     |
| ALB.resultn   | <  | 3.31 TBILI.resultn      | <  |         | 1.6                 |         | -0.000705223 | 186          |     |
| ALB.resultn   | <  | 3.31 TBILI.resultn      | >= |         | 1.6                 |         | 0.003947941  | 186          |     |
| ALB.resultn   | >= | 3.31 age.yrs            | =  | Missing |                     |         | -0.001294611 | 186          |     |
| ALB.resultn   | >= | 3.31 age.yrs            | <  |         | 53.33470226         |         | -0.001653761 | 186          |     |

|               |    |                         |    |                     |    |         |  |              |     |
|---------------|----|-------------------------|----|---------------------|----|---------|--|--------------|-----|
| ALB.resultn   | >= | 3.31 age.yrs            | >= | 53.33470226         |    |         |  | 0            | 186 |
| TBILL.resultn | =  | Missing                 |    |                     |    |         |  | -0.003195802 | 187 |
| TBILL.resultn | <  | 2.05 age.yrs            | =  | Missing             |    |         |  | -0.002563173 | 187 |
| TBILL.resultn | <  | 2.05 age.yrs            | <  | 64.89253936         |    |         |  | -0.002839207 | 187 |
| TBILL.resultn | <  | 2.05 age.yrs            | >= | 64.89253936         |    |         |  | 0            | 187 |
| TBILL.resultn | >= | 2.05 age.yrs            | =  | Missing             |    |         |  | 0.000853864  | 187 |
| TBILL.resultn | >= | 2.05 age.yrs            | <  | 46.56947296         |    |         |  | -0.000849569 | 187 |
| TBILL.resultn | >= | 2.05 age.yrs            | >= | 46.56947296         |    |         |  | 0.00272764   | 187 |
| TBILL.resultn | =  | Missing                 |    |                     |    | Missing |  | -0.003588816 | 188 |
| TBILL.resultn | <  | 3.95 Sodium.resultn     | =  | Missing             |    | Missing |  | -0.003386919 | 188 |
| TBILL.resultn | <  | 3.95 Sodium.resultn     | <  | 136.5               |    | Missing |  | 0.000352841  | 188 |
| TBILL.resultn | <  | 3.95 Sodium.resultn     | >= | 136.5 TBILL.resultn | =  | Missing |  | -0.002804879 | 188 |
| TBILL.resultn | <  | 3.95 Sodium.resultn     | >= | 136.5 TBILL.resultn | <  | 1.9     |  | -0.003059868 | 188 |
| TBILL.resultn | <  | 3.95 Sodium.resultn     | >= | 136.5 TBILL.resultn | >= | 1.9     |  | 0            | 188 |
| TBILL.resultn | >= | 3.95                    |    |                     |    | Missing |  | 0.002208854  | 188 |
| TBILL.resultn | =  | Missing                 |    |                     |    |         |  | -0.003377799 | 189 |
| TBILL.resultn | <  | 1.95 age.yrs            | =  | Missing             |    |         |  | -0.003479189 | 189 |
| TBILL.resultn | <  | 1.95 age.yrs            | <  | 69.84257358         |    |         |  | -0.003649737 | 189 |
| TBILL.resultn | <  | 1.95 age.yrs            | >= | 69.84257358         |    |         |  | 0            | 189 |
| TBILL.resultn | >= | 1.95 ALB.resultn        | =  | Missing             |    |         |  | -3.83E-05    | 189 |
| TBILL.resultn | >= | 1.95 ALB.resultn        | <  | 3.41                |    |         |  | 0.003490259  | 189 |
| TBILL.resultn | >= | 1.95 ALB.resultn        | >= | 3.41                |    |         |  | -0.002243675 | 189 |
| TBILL.resultn | =  | Missing                 |    |                     |    |         |  | -0.001076153 | 190 |
| TBILL.resultn | <  | 1.95 age.yrs            | =  | Missing             |    |         |  | -0.001970148 | 190 |
| TBILL.resultn | <  | 1.95 age.yrs            | <  | 63.52635181         |    |         |  | -0.002199477 | 190 |
| TBILL.resultn | <  | 1.95 age.yrs            | >= | 63.52635181         |    |         |  | 0            | 190 |
| TBILL.resultn | >= | 1.95 PLT.resultn        | =  | Missing             |    |         |  | 0.000816982  | 190 |
| TBILL.resultn | >= | 1.95 PLT.resultn        | <  | 249.5               |    |         |  | 0.002554554  | 190 |
| TBILL.resultn | >= | 1.95 PLT.resultn        | >= | 249.5               |    |         |  | -0.001868356 | 190 |
| ALK.times.uln | =  | Missing age.yrs         | =  | Missing             |    |         |  | -0.004955553 | 191 |
| ALK.times.uln | =  | Missing age.yrs         | <  | 53.46475017         |    |         |  | -0.006138117 | 191 |
| ALK.times.uln | =  | Missing age.yrs         | >= | 53.46475017         |    |         |  | -0.002117401 | 191 |
| ALK.times.uln | <  | 5.412513212             |    |                     |    |         |  | -0.005593938 | 191 |
| ALK.times.uln | >= | 5.412513212 age.yrs     | =  | Missing             |    |         |  | -0.0025737   | 191 |
| ALK.times.uln | >= | 5.412513212 age.yrs     | <  | 43.25119781         |    |         |  | -0.0051474   | 191 |
| ALK.times.uln | >= | 5.412513212 age.yrs     | >= | 43.25119781         |    |         |  | 0            | 191 |
| TBILL.resultn | =  | Missing                 |    |                     |    |         |  | 4.94E-05     | 192 |
| TBILL.resultn | <  | 2.35 ALB.resultn        | =  | Missing             |    |         |  | 0            | 192 |
| TBILL.resultn | <  | 2.35 ALB.resultn        | <  | 3.245               |    |         |  | 0.001273749  | 192 |
| TBILL.resultn | <  | 2.35 ALB.resultn        | >= | 3.245               |    |         |  | -0.001097113 | 192 |
| TBILL.resultn | >= | 2.35 PLT.resultn        | =  | Missing             |    |         |  | 0.001789019  | 192 |
| TBILL.resultn | >= | 2.35 PLT.resultn        | <  | 249.5               |    |         |  | 0.00415351   | 192 |
| TBILL.resultn | >= | 2.35 PLT.resultn        | >= | 249.5               |    |         |  | -0.000575471 | 192 |
| TBILL.resultn | =  | Missing                 |    |                     |    |         |  | -0.000871737 | 193 |
| TBILL.resultn | <  | 2.35 AST.resultn        | =  | Missing             |    |         |  | -0.001009001 | 193 |
| TBILL.resultn | <  | 2.35 AST.resultn        | <  | 56                  |    |         |  | -0.00173448  | 193 |
| TBILL.resultn | <  | 2.35 AST.resultn        | >= | 56                  |    |         |  | 0            | 193 |
| TBILL.resultn | >= | 2.35 Hemoglobin.resultn | =  | Missing             |    |         |  | 0.000740902  | 193 |
| TBILL.resultn | >= | 2.35 Hemoglobin.resultn | <  | 12.95               |    |         |  | 0.002242411  | 193 |
| TBILL.resultn | >= | 2.35 Hemoglobin.resultn | >= | 12.95               |    |         |  | -0.000897108 | 193 |
| ALB.resultn   | =  | Missing                 |    |                     |    | Missing |  | -0.000427512 | 194 |
| ALB.resultn   | <  | 3.105                   |    |                     |    | Missing |  | 0.003611448  | 194 |
| ALB.resultn   | >= | 3.105 Sodium.resultn    | =  | Missing             |    | Missing |  | -0.000796909 | 194 |
| ALB.resultn   | >= | 3.105 Sodium.resultn    | <  | 136.5               |    | Missing |  | 0.002452846  | 194 |
| ALB.resultn   | >= | 3.105 Sodium.resultn    | >= | 136.5 TBILL.resultn | =  | Missing |  | -0.000662551 | 194 |
| ALB.resultn   | >= | 3.105 Sodium.resultn    | >= | 136.5 TBILL.resultn | <  | 0.85    |  | -0.001104251 | 194 |
| ALB.resultn   | >= | 3.105 Sodium.resultn    | >= | 136.5 TBILL.resultn | >= | 0.85    |  | 0            | 194 |
| ALB.resultn   | =  | Missing                 |    |                     |    |         |  | -0.001646706 | 195 |
| ALB.resultn   | <  | 3.33 TBILL.resultn      | =  | Missing             |    |         |  | 0.002471507  | 195 |
| ALB.resultn   | <  | 3.33 TBILL.resultn      | <  | 1.31                |    |         |  | -0.000264379 | 195 |
| ALB.resultn   | <  | 3.33 TBILL.resultn      | >= | 1.31                |    |         |  | 0.006202262  | 195 |
| ALB.resultn   | >= | 3.33 age.yrs            | =  | Missing             |    |         |  | -0.000994135 | 195 |

|               |    |                           |         |                         |             |             |              |              |     |
|---------------|----|---------------------------|---------|-------------------------|-------------|-------------|--------------|--------------|-----|
| ALB.resultn   | >= | 3.33 age.yrs              | <       | 53.33470226             |             |             | -0.001465804 | 195          |     |
| ALB.resultn   | >= | 3.33 age.yrs              | >=      | 53.33470226             |             |             | 0            | 195          |     |
| ALB.resultn   | =  | Missing                   |         |                         |             | Missing     | -0.00377703  | 196          |     |
| ALB.resultn   | <  | 2.915                     |         |                         |             | Missing     | 0.003188113  | 196          |     |
| ALB.resultn   | >= | 2.915 TBILI.resultn       | =       | Missing                 |             | Missing     | -0.003359325 | 196          |     |
| ALB.resultn   | >= | 2.915 TBILI.resultn       | <       | 0.85                    |             | Missing     | -0.004092993 | 196          |     |
| ALB.resultn   | >= | 2.915 TBILI.resultn       | >=      | 0.85 age.yrs            | =           | Missing     | -0.002407975 | 196          |     |
| ALB.resultn   | >= | 2.915 TBILI.resultn       | >=      | 0.85 age.yrs            | <           | 51.76180698 | -0.003592225 | 196          |     |
| ALB.resultn   | >= | 2.915 TBILI.resultn       | >=      | 0.85 age.yrs            | >=          | 51.76180698 | 0            | 196          |     |
| TBILI.resultn | =  | Missing                   |         |                         |             | Missing     | 0.001274809  | 197          |     |
| TBILI.resultn | <  | 1.65                      |         |                         |             | Missing     | 0.000443206  | 197          |     |
| TBILI.resultn | >= | 1.65 PLT.resultn          | =       | Missing                 |             | Missing     | 0.004353285  | 197          |     |
| TBILI.resultn | >= | 1.65 PLT.resultn          | <       | 221                     |             | Missing     | 0.011870357  | 197          |     |
| TBILI.resultn | >= | 1.65 PLT.resultn          | >=      | 221 Hemoglobin.resultn  | =           | Missing     | 0.001084993  | 197          |     |
| TBILI.resultn | >= | 1.65 PLT.resultn          | >=      | 221 Hemoglobin.resultn  | <           | 13.75       | 0.002386984  | 197          |     |
| TBILI.resultn | >= | 1.65 PLT.resultn          | >=      | 221 Hemoglobin.resultn  | >=          | 13.75       | 0            | 197          |     |
| ALB.resultn   | =  | Missing                   |         |                         |             | Missing     | -0.003573668 | 198          |     |
| ALB.resultn   | <  | 2.915                     |         |                         |             | Missing     | 0.002881073  | 198          |     |
| ALB.resultn   | >= | 2.915 TBILI.resultn       | =       | Missing                 |             | Missing     | -0.004198753 | 198          |     |
| ALB.resultn   | >= | 2.915 TBILI.resultn       | <       | 1.05                    |             | Missing     | -0.004722582 | 198          |     |
| ALB.resultn   | >= | 2.915 TBILI.resultn       | >=      | 1.05 Hemoglobin.resultn | =           | Missing     | 0            | 198          |     |
| ALB.resultn   | >= | 2.915 TBILI.resultn       | >=      | 1.05 Hemoglobin.resultn | <           | 13.35       | -0.002714639 | 198          |     |
| ALB.resultn   | >= | 2.915 TBILI.resultn       | >=      | 1.05 Hemoglobin.resultn | >=          | 13.35       | -0.004818316 | 198          |     |
| ALB.resultn   | =  | Missing                   |         |                         |             | Missing     | -0.003734154 | 199          |     |
| ALB.resultn   | <  | 2.915                     |         |                         |             | Missing     | 0.00385636   | 199          |     |
| ALB.resultn   | >= | 2.915 PLT.resultn         | =       | Missing                 |             | Missing     | -0.003832988 | 199          |     |
| ALB.resultn   | >= | 2.915 PLT.resultn         | <       | 197.5 PLT.resultn       | =           | Missing     | -0.001721317 | 199          |     |
| ALB.resultn   | >= | 2.915 PLT.resultn         | <       | 197.5 PLT.resultn       | <           | 181.5       | -0.004303292 | 199          |     |
| ALB.resultn   | >= | 2.915 PLT.resultn         | <       | 197.5 PLT.resultn       | >=          | 181.5       | 0            | 199          |     |
| ALB.resultn   | >= | 2.915 PLT.resultn         | >=      | 197.5                   |             | Missing     | -0.003981523 | 199          |     |
| ALB.resultn   | =  | Missing                   |         |                         |             | Missing     | -0.001194615 | 200          |     |
| ALB.resultn   | <  | 2.965                     |         |                         |             | Missing     | 0.005465245  | 200          |     |
| ALB.resultn   | >= | 2.965 TBILI.resultn       | =       | Missing                 |             | Missing     | -0.000451542 | 200          |     |
| ALB.resultn   | >= | 2.965 TBILI.resultn       | <       | 0.85                    |             | Missing     | -0.001209334 | 200          |     |
| ALB.resultn   | >= | 2.965 TBILI.resultn       | >=      | 0.85 Sodium.resultn     | =           | Missing     | 0            | 200          |     |
| ALB.resultn   | >= | 2.965 TBILI.resultn       | >=      | 0.85 Sodium.resultn     | <           | 137.5       | 0.00446447   | 200          |     |
| ALB.resultn   | >= | 2.965 TBILI.resultn       | >=      | 0.85 Sodium.resultn     | >=          | 137.5       | -0.000210479 | 200          |     |
| TBILI.resultn | =  | Missing                   |         |                         |             |             | 0.000135638  | 201          |     |
| TBILI.resultn | <  | 2.05 age.yrs              | =       | Missing                 |             |             | -0.002264213 | 201          |     |
| TBILI.resultn | <  | 2.05 age.yrs              | <       | 60.43394935             |             |             | -0.002641582 | 201          |     |
| TBILI.resultn | <  | 2.05 age.yrs              | >=      | 60.43394935             |             |             | 0            | 201          |     |
| TBILI.resultn | >= | 2.05 Hemoglobin.resultn   | =       | Missing                 |             |             | -0.00018116  | 201          |     |
| TBILI.resultn | >= | 2.05 Hemoglobin.resultn   | <       | 12.75                   |             |             | 0.002395347  | 201          |     |
| TBILI.resultn | >= | 2.05 Hemoglobin.resultn   | >=      | 12.75                   |             |             | -0.002757668 | 201          |     |
| TBILI.resultn | =  | Missing                   |         |                         |             |             | -0.000427351 | 202          |     |
| TBILI.resultn | <  | 1.95 TBILI.resultn        | =       | Missing                 |             |             | -0.000799555 | 202          |     |
| TBILI.resultn | <  | 1.95 TBILI.resultn        | <       | 0.85                    |             |             | -0.001354086 | 202          |     |
| TBILI.resultn | <  | 1.95 TBILI.resultn        | >=      | 0.85                    |             |             | 0            | 202          |     |
| TBILI.resultn | >= | 1.95 AST.resultn          | =       | Missing                 |             |             | 0.001834351  | 202          |     |
| TBILI.resultn | >= | 1.95 AST.resultn          | <       | 97.5                    |             |             | -0.001353671 | 202          |     |
| TBILI.resultn | >= | 1.95 AST.resultn          | >=      | 97.5                    |             |             | 0.005022373  | 202          |     |
| TBILI.resultn | =  | Missing                   |         |                         |             | Missing     | -0.001896571 | 203          |     |
| TBILI.resultn | <  | 2.35 ALK.times.uln        | =       | Missing                 | age.yrs     | =           | Missing      | -0.00221426  | 203 |
| TBILI.resultn | <  | 2.35 ALK.times.uln        | =       | Missing                 | age.yrs     | <           | 53.44969199  | -0.003395199 | 203 |
| TBILI.resultn | <  | 2.35 ALK.times.uln        | =       | Missing                 | age.yrs     | >=          | 53.44969199  | 0            | 203 |
| TBILI.resultn | <  | 2.35 ALK.times.uln        | <       | 5.92438247              |             |             | Missing      | -0.003153977 | 203 |
| TBILI.resultn | <  | 2.35 ALK.times.uln        | >=      | 5.92438247              |             |             | Missing      | -0.000666543 | 203 |
| TBILI.resultn | >= | 2.35                      |         |                         |             |             | Missing      | 0.000675925  | 203 |
| ALK.times.uln | =  | Missing                   | age.yrs | =                       | Missing     |             | 0.000240108  | 204          |     |
| ALK.times.uln | =  | Missing                   | age.yrs | <                       | 54.39972621 |             | -0.000763101 | 204          |     |
| ALK.times.uln | =  | Missing                   | age.yrs | >=                      | 54.39972621 |             | 0.003131713  | 204          |     |
| ALK.times.uln | <  | 5.446215139 TBILI.resultn | =       | Missing                 |             |             | -0.000302651 | 204          |     |



|               |    |             |                    |    |             |               |         |              |              |     |
|---------------|----|-------------|--------------------|----|-------------|---------------|---------|--------------|--------------|-----|
| ALK.times.uln | <  | 5.446215139 | TBILL.resultn      | <  | 0.65        |               |         | -0.000765798 | 204          |     |
| ALK.times.uln | <  | 5.446215139 | TBILL.resultn      | >= | 0.65        |               |         | 0            | 204          |     |
| ALK.times.uln | >= | 5.446215139 |                    |    |             |               |         | 0.003178512  | 204          |     |
| age.yrs       | =  | Missing     |                    |    |             | Missing       |         | -0.001638242 | 205          |     |
| age.yrs       | <  | 51.92060233 |                    |    |             | Missing       |         | -0.0021724   | 205          |     |
| age.yrs       | >= | 51.92060233 | TBILL.resultn      | =  | Missing     | Missing       |         | -8.51E-05    | 205          |     |
| age.yrs       | >= | 51.92060233 | TBILL.resultn      | <  | 1.31        | AST.resultn   | =       | Missing      | -0.001443385 | 205 |
| age.yrs       | >= | 51.92060233 | TBILL.resultn      | <  | 1.31        | AST.resultn   | <       | 51           | -0.002646206 | 205 |
| age.yrs       | >= | 51.92060233 | TBILL.resultn      | <  | 1.31        | AST.resultn   | >=      | 51           | 0            | 205 |
| age.yrs       | >= | 51.92060233 | TBILL.resultn      | >= | 1.31        |               | Missing |              | 0.003430557  | 205 |
| ALB.resultn   | =  | Missing     |                    |    |             |               |         | -0.000518146 | 206          |     |
| ALB.resultn   | <  | 3.34        | TBILL.resultn      | =  | Missing     |               |         | 0.004098537  | 206          |     |
| ALB.resultn   | <  | 3.34        | TBILL.resultn      | <  | 1.05        |               |         | 0.000566535  | 206          |     |
| ALB.resultn   | <  | 3.34        | TBILL.resultn      | >= | 1.05        |               |         | 0.008690139  | 206          |     |
| ALB.resultn   | >= | 3.34        | TBILL.resultn      | =  | Missing     |               |         | -0.001043949 | 206          |     |
| ALB.resultn   | >= | 3.34        | TBILL.resultn      | <  | 1.15        |               |         | -0.001465971 | 206          |     |
| ALB.resultn   | >= | 3.34        | TBILL.resultn      | >= | 1.15        |               |         | 0            | 206          |     |
| ALB.resultn   | =  | Missing     |                    |    |             | Missing       |         | -0.005402095 | 207          |     |
| ALB.resultn   | <  | 2.915       |                    |    |             | Missing       |         | -0.000457289 | 207          |     |
| ALB.resultn   | >= | 2.915       | PLT.resultn        | =  | Missing     | Missing       |         | -0.005107007 | 207          |     |
| ALB.resultn   | >= | 2.915       | PLT.resultn        | <  | 206.5       | TBILL.resultn | =       | Missing      | -0.003293188 | 207 |
| ALB.resultn   | >= | 2.915       | PLT.resultn        | <  | 206.5       | TBILL.resultn | <       | 1.45         | -0.004610463 | 207 |
| ALB.resultn   | >= | 2.915       | PLT.resultn        | <  | 206.5       | TBILL.resultn | >=      | 1.45         | 0            | 207 |
| ALB.resultn   | >= | 2.915       | PLT.resultn        | >= | 206.5       |               | Missing |              | -0.00540453  | 207 |
| ALB.resultn   | =  | Missing     |                    |    |             | Missing       |         | -0.008245875 | 208          |     |
| ALB.resultn   | <  | 2.95        |                    |    |             | Missing       |         | -0.002332449 | 208          |     |
| ALB.resultn   | >= | 2.95        | TBILL.resultn      | =  | Missing     | Missing       |         | -0.007447257 | 208          |     |
| ALB.resultn   | >= | 2.95        | TBILL.resultn      | <  | 1.65        |               | Missing |              | -0.007852004 | 208 |
| ALB.resultn   | >= | 2.95        | TBILL.resultn      | >= | 1.65        | age.yrs       | =       | Missing      | -0.005165959 | 208 |
| ALB.resultn   | >= | 2.95        | TBILL.resultn      | >= | 1.65        | age.yrs       | <       | 53.35797399  | -0.007748939 | 208 |
| ALB.resultn   | >= | 2.95        | TBILL.resultn      | >= | 1.65        | age.yrs       | >=      | 53.35797399  | 0            | 208 |
| TBILL.resultn | =  | Missing     |                    |    |             | Missing       |         | 0.001548417  | 209          |     |
| TBILL.resultn | <  | 2.85        | psc.yrs.dur        | =  | Missing     | Missing       |         | 0.000651099  | 209          |     |
| TBILL.resultn | <  | 2.85        | psc.yrs.dur        | <  | 6.410677618 |               | Missing |              | 0.000284718  | 209 |
| TBILL.resultn | <  | 2.85        | psc.yrs.dur        | >= | 6.410677618 | psc.yrs.dur   | =       | Missing      | 0.003427145  | 209 |
| TBILL.resultn | <  | 2.85        | psc.yrs.dur        | >= | 6.410677618 | psc.yrs.dur   | <       | 9.876796715  | 0.007425481  | 209 |
| TBILL.resultn | <  | 2.85        | psc.yrs.dur        | >= | 6.410677618 | psc.yrs.dur   | >=      | 9.876796715  | 0            | 209 |
| TBILL.resultn | >= | 2.85        |                    |    |             | Missing       |         | 0.004121481  | 209          |     |
| ALK.times.uln | =  | Missing     | age.yrs            | =  | Missing     | Missing       |         | -0.005641342 | 210          |     |
| ALK.times.uln | =  | Missing     | age.yrs            | <  | 53.46475017 |               | Missing |              | -0.006634045 | 210 |
| ALK.times.uln | =  | Missing     | age.yrs            | >= | 53.46475017 | AST.resultn   | =       | Missing      | -0.003612776 | 210 |
| ALK.times.uln | =  | Missing     | age.yrs            | >= | 53.46475017 | AST.resultn   | <       | 40.5         | -0.006623423 | 210 |
| ALK.times.uln | =  | Missing     | age.yrs            | >= | 53.46475017 | AST.resultn   | >=      | 40.5         | 0            | 210 |
| ALK.times.uln | <  | 6.02        |                    |    |             | Missing       |         | -0.006182065 | 210          |     |
| ALK.times.uln | >= | 6.02        |                    |    |             | Missing       |         | -0.001497771 | 210          |     |
| ALB.resultn   | =  | Missing     |                    |    |             |               |         | -0.008163275 | 211          |     |
| ALB.resultn   | <  | 3.33        | psc.yrs.dur        | =  | Missing     |               |         | -0.003322719 | 211          |     |
| ALB.resultn   | <  | 3.33        | psc.yrs.dur        | <  | 2.869267625 |               |         | -0.006343372 | 211          |     |
| ALB.resultn   | <  | 3.33        | psc.yrs.dur        | >= | 2.869267625 |               |         | 0            | 211          |     |
| ALB.resultn   | >= | 3.33        | TBILL.resultn      | =  | Missing     |               |         | -0.008238524 | 211          |     |
| ALB.resultn   | >= | 3.33        | TBILL.resultn      | <  | 0.75        |               |         | -0.00881405  | 211          |     |
| ALB.resultn   | >= | 3.33        | TBILL.resultn      | >= | 0.75        |               |         | -0.007736919 | 211          |     |
| TBILL.resultn | =  | Missing     |                    |    |             |               |         | 0.00287127   | 212          |     |
| TBILL.resultn | <  | 1.15        | Sodium.resultn     | =  | Missing     |               |         | 0            | 212          |     |
| TBILL.resultn | <  | 1.15        | Sodium.resultn     | <  | 137.5       |               |         | 0.00283823   | 212          |     |
| TBILL.resultn | <  | 1.15        | Sodium.resultn     | >= | 137.5       |               |         | -5.08E-07    | 212          |     |
| TBILL.resultn | >= | 1.15        | Hemoglobin.resultn | =  | Missing     |               |         | 0.008627665  | 212          |     |
| TBILL.resultn | >= | 1.15        | Hemoglobin.resultn | <  | 13.3        |               |         | 0.00274322   | 212          |     |
| TBILL.resultn | >= | 1.15        | Hemoglobin.resultn | >= | 13.3        |               |         | -4.64E-06    | 212          |     |
| ALB.resultn   | =  | Missing     |                    |    |             | Missing       |         | -0.003269852 | 213          |     |
| ALB.resultn   | <  | 3.13        |                    |    |             | Missing       |         | -0.000220181 | 213          |     |
| ALB.resultn   | >= | 3.13        | age.yrs            | =  | Missing     | Missing       |         | -0.002933377 | 213          |     |

|               |    |                     |             |             |                    |         |              |              |     |
|---------------|----|---------------------|-------------|-------------|--------------------|---------|--------------|--------------|-----|
| ALB.resultn   | >= | 3.13 age.yrs        | <           | 51.92060233 |                    | Missing | -0.003471258 | 213          |     |
| ALB.resultn   | >= | 3.13 age.yrs        | >=          | 51.92060233 | AST.resultn        | =       | Missing      | -0.001809446 | 213 |
| ALB.resultn   | >= | 3.13 age.yrs        | >=          | 51.92060233 | AST.resultn        | <       | 51.5         | -0.003731982 | 213 |
| ALB.resultn   | >= | 3.13 age.yrs        | >=          | 51.92060233 | AST.resultn        | >=      | 51.5         | 0            | 213 |
| TBILL.resultn | =  | Missing             |             |             |                    | Missing | -0.002379283 | 214          |     |
| TBILL.resultn | <  | 2.8 Sodium.resultn  | =           | Missing     | age.yrs            | =       | Missing      | -0.002834468 | 214 |
| TBILL.resultn | <  | 2.8 Sodium.resultn  | =           | Missing     | age.yrs            | <       | 58.80903491  | -0.003321643 | 214 |
| TBILL.resultn | <  | 2.8 Sodium.resultn  | =           | Missing     | age.yrs            | >=      | 58.80903491  | 0            | 214 |
| TBILL.resultn | <  | 2.8 Sodium.resultn  | <           | 136.5       |                    | Missing | 0.000532684  | 214          |     |
| TBILL.resultn | <  | 2.8 Sodium.resultn  | >=          | 136.5       |                    | Missing | -0.002711152 | 214          |     |
| TBILL.resultn | >= | 2.8                 |             |             |                    | Missing | 0.000754178  | 214          |     |
| TBILL.resultn | =  | Missing             |             |             |                    |         | 0.000957303  | 215          |     |
| TBILL.resultn | <  | 2.35 Sodium.resultn | =           | Missing     |                    |         | 0            | 215          |     |
| TBILL.resultn | <  | 2.35 Sodium.resultn | <           | 136.5       |                    |         | 0.003215509  | 215          |     |
| TBILL.resultn | <  | 2.35 Sodium.resultn | >=          | 136.5       |                    |         | 0.000397529  | 215          |     |
| TBILL.resultn | >= | 2.35 PLT.resultn    | =           | Missing     |                    |         | 0.002771648  | 215          |     |
| TBILL.resultn | >= | 2.35 PLT.resultn    | <           | 217.5       |                    |         | 0.005716083  | 215          |     |
| TBILL.resultn | >= | 2.35 PLT.resultn    | >=          | 217.5       |                    |         | 0.000506699  | 215          |     |
| TBILL.resultn | =  | Missing             |             |             |                    |         | -0.002302112 | 216          |     |
| TBILL.resultn | <  | 1.95 psc.yrs.dur    | =           | Missing     |                    |         | -0.002613579 | 216          |     |
| TBILL.resultn | <  | 1.95 psc.yrs.dur    | <           | 6.262833676 |                    |         | -0.003013471 | 216          |     |
| TBILL.resultn | <  | 1.95 psc.yrs.dur    | >=          | 6.262833676 |                    |         | 0            | 216          |     |
| TBILL.resultn | >= | 1.95 PLT.resultn    | =           | Missing     |                    |         | 0.001180353  | 216          |     |
| TBILL.resultn | >= | 1.95 PLT.resultn    | <           | 241.5       |                    |         | 0.004548474  | 216          |     |
| TBILL.resultn | >= | 1.95 PLT.resultn    | >=          | 241.5       |                    |         | -0.002187769 | 216          |     |
| TBILL.resultn | =  | Missing             |             |             |                    |         | -0.000372629 | 217          |     |
| TBILL.resultn | <  | 1.95 Sodium.resultn | =           | Missing     |                    |         | 0            | 217          |     |
| TBILL.resultn | <  | 1.95 Sodium.resultn | <           | 136.5       |                    |         | 0.004443156  | 217          |     |
| TBILL.resultn | <  | 1.95 Sodium.resultn | >=          | 136.5       |                    |         | 0.000363705  | 217          |     |
| TBILL.resultn | >= | 1.95 ALK.times.uln  | =           | Missing     |                    |         | 0.001549723  | 217          |     |
| TBILL.resultn | >= | 1.95 ALK.times.uln  | <           | 4.819799065 |                    |         | 0.001928506  | 217          |     |
| TBILL.resultn | >= | 1.95 ALK.times.uln  | >=          | 4.819799065 |                    |         | 0.00117094   | 217          |     |
| ALB.resultn   | =  | Missing             |             |             |                    | Missing | -0.00701669  | 218          |     |
| ALB.resultn   | <  | 2.95                |             |             |                    | Missing | -0.002330709 | 218          |     |
| ALB.resultn   | >= | 2.95 TBILL.resultn  | =           | Missing     |                    | Missing | -0.006926055 | 218          |     |
| ALB.resultn   | >= | 2.95 TBILL.resultn  | <           | 1.15        |                    | Missing | -0.007477909 | 218          |     |
| ALB.resultn   | >= | 2.95 TBILL.resultn  | >=          | 1.15        | Hemoglobin.resultn | =       | Missing      | 0            | 218 |
| ALB.resultn   | >= | 2.95 TBILL.resultn  | >=          | 1.15        | Hemoglobin.resultn | <       | 13.75        | -0.006805086 | 218 |
| ALB.resultn   | >= | 2.95 TBILL.resultn  | >=          | 1.15        | Hemoglobin.resultn | >=      | 13.75        | -0.00773006  | 218 |
| TBILL.resultn | =  | Missing             |             |             |                    |         | 0.002128853  | 219          |     |
| TBILL.resultn | <  | 2.05 Sodium.resultn | =           | Missing     |                    |         | 0            | 219          |     |
| TBILL.resultn | <  | 2.05 Sodium.resultn | <           | 136.5       |                    |         | 0.004172493  | 219          |     |
| TBILL.resultn | <  | 2.05 Sodium.resultn | >=          | 136.5       |                    |         | 0.000474287  | 219          |     |
| TBILL.resultn | >= | 2.05 PLT.resultn    | =           | Missing     |                    |         | 0.003475036  | 219          |     |
| TBILL.resultn | >= | 2.05 PLT.resultn    | <           | 217.5       |                    |         | 0.005882709  | 219          |     |
| TBILL.resultn | >= | 2.05 PLT.resultn    | >=          | 217.5       |                    |         | 0.001970241  | 219          |     |
| ALK.times.uln | =  | Missing             | ALB.resultn | =           | Missing            |         | -0.00035297  | 220          |     |
| ALK.times.uln | =  | Missing             | ALB.resultn | <           | 3.55               |         | 0.006520107  | 220          |     |
| ALK.times.uln | =  | Missing             | ALB.resultn | >=          | 3.55               |         | 0.00030396   | 220          |     |
| ALK.times.uln | <  | 6.02 Sodium.resultn | =           | Missing     |                    |         | 0            | 220          |     |
| ALK.times.uln | <  | 6.02 Sodium.resultn | <           | 136.5       |                    |         | 0.002162344  | 220          |     |
| ALK.times.uln | <  | 6.02 Sodium.resultn | >=          | 136.5       |                    |         | -0.000376948 | 220          |     |
| ALK.times.uln | >= | 6.02                |             |             |                    |         | 0.005060104  | 220          |     |
| TBILL.resultn | =  | Missing             |             |             |                    | Missing | -0.001607785 | 221          |     |
| TBILL.resultn | <  | 0.75                |             |             |                    | Missing | -0.002247478 | 221          |     |
| TBILL.resultn | >= | 0.75 AST.resultn    | =           | Missing     |                    | Missing | -0.000337962 | 221          |     |
| TBILL.resultn | >= | 0.75 AST.resultn    | <           | 47.5        |                    | Missing | -0.002239737 | 221          |     |
| TBILL.resultn | >= | 0.75 AST.resultn    | >=          | 47.5        | ALB.resultn        | =       | Missing      | 0.000400375  | 221 |
| TBILL.resultn | >= | 0.75 AST.resultn    | >=          | 47.5        | ALB.resultn        | <       | 3.34         | 0.002669165  | 221 |
| TBILL.resultn | >= | 0.75 AST.resultn    | >=          | 47.5        | ALB.resultn        | >=      | 3.34         | 0            | 221 |
| AST.resultn   | =  | Missing             |             |             |                    | Missing | -0.000427712 | 222          |     |
| AST.resultn   | <  | 57.5                |             |             |                    | Missing | -0.000449422 | 222          |     |

|               |    |                            |    |                         |    |             |              |     |
|---------------|----|----------------------------|----|-------------------------|----|-------------|--------------|-----|
| AST.resultn   | >= | 57.5 psc.yrs.dur           | =  | Missing                 |    | Missing     | 0.001981906  | 222 |
| AST.resultn   | >= | 57.5 psc.yrs.dur           | <  | 6.506502396 AST.resultn | =  | Missing     | 0.0009389    | 222 |
| AST.resultn   | >= | 57.5 psc.yrs.dur           | <  | 6.506502396 AST.resultn | <  | 72.5        | 0.003301292  | 222 |
| AST.resultn   | >= | 57.5 psc.yrs.dur           | <  | 6.506502396 AST.resultn | >= | 72.5        | 0            | 222 |
| AST.resultn   | >= | 57.5 psc.yrs.dur           | >= | 6.506502396             |    | Missing     | 0.00866942   | 222 |
| ALB.resultn   | =  | Missing Hemoglobin.resultn | =  | Missing                 |    |             | 0            | 223 |
| ALB.resultn   | =  | Missing Hemoglobin.resultn | <  | 13.9                    |    |             | 0.003488278  | 223 |
| ALB.resultn   | =  | Missing Hemoglobin.resultn | >= | 13.9                    |    |             | 2.60E-06     | 223 |
| ALB.resultn   | <  | 3.31                       |    |                         |    |             | 0.004201041  | 223 |
| ALB.resultn   | >= | 3.31 TBILI.resultn         | =  | Missing                 |    |             | 0.000557093  | 223 |
| ALB.resultn   | >= | 3.31 TBILI.resultn         | <  | 0.75                    |    |             | 6.88E-07     | 223 |
| ALB.resultn   | >= | 3.31 TBILI.resultn         | >= | 0.75                    |    |             | 0.001076048  | 223 |
| TBILI.resultn | =  | Missing                    |    |                         |    | Missing     | -0.003250303 | 224 |
| TBILI.resultn | <  | 1.25                       |    |                         |    | Missing     | -0.003027593 | 224 |
| TBILI.resultn | >= | 1.25 age.yrs               | =  | Missing                 |    | Missing     | -0.000737644 | 224 |
| TBILI.resultn | >= | 1.25 age.yrs               | <  | 51.51813826             |    | Missing     | -0.002207419 | 224 |
| TBILI.resultn | >= | 1.25 age.yrs               | >= | 51.51813826 ALB.resultn | =  | Missing     | 0.002761821  | 224 |
| TBILI.resultn | >= | 1.25 age.yrs               | >= | 51.51813826 ALB.resultn | <  | 3.595       | 0.005272567  | 224 |
| TBILI.resultn | >= | 1.25 age.yrs               | >= | 51.51813826 ALB.resultn | >= | 3.595       | 0            | 224 |
| ALK.times.uln | =  | Missing TBILI.resultn      | =  | Missing                 |    |             | -0.001975409 | 225 |
| ALK.times.uln | =  | Missing TBILI.resultn      | <  | 0.95                    |    |             | -0.001990168 | 225 |
| ALK.times.uln | =  | Missing TBILI.resultn      | >= | 0.95                    |    |             | 0.002408506  | 225 |
| ALK.times.uln | <  | 6.02173913 psc.yrs.dur     | =  | Missing                 |    |             | -0.001563583 | 225 |
| ALK.times.uln | <  | 6.02173913 psc.yrs.dur     | <  | 2.628336756             |    |             | -0.001997278 | 225 |
| ALK.times.uln | <  | 6.02173913 psc.yrs.dur     | >= | 2.628336756             |    |             | 0            | 225 |
| ALK.times.uln | >= | 6.02173913                 |    |                         |    |             | 0.002171476  | 225 |
| ALK.times.uln | =  | Missing TBILI.resultn      | =  | Missing                 |    |             | -0.000183438 | 226 |
| ALK.times.uln | =  | Missing TBILI.resultn      | <  | 1.65                    |    |             | -0.000765141 | 226 |
| ALK.times.uln | =  | Missing TBILI.resultn      | >= | 1.65                    |    |             | 0.002492396  | 226 |
| ALK.times.uln | <  | 5.963877551 PLT.resultn    | =  | Missing                 |    |             | 0            | 226 |
| ALK.times.uln | <  | 5.963877551 PLT.resultn    | <  | 186.5                   |    |             | 0.001680092  | 226 |
| ALK.times.uln | <  | 5.963877551 PLT.resultn    | >= | 186.5                   |    |             | -0.000837769 | 226 |
| ALK.times.uln | >= | 5.963877551                |    |                         |    |             | 0.002376947  | 226 |
| TBILI.resultn | =  | Missing                    |    |                         |    |             | 0.000351327  | 227 |
| TBILI.resultn | <  | 1.55 ALK.times.uln         | =  | Missing                 |    |             | 0            | 227 |
| TBILI.resultn | <  | 1.55 ALK.times.uln         | <  | 3.579782609             |    |             | -0.000783946 | 227 |
| TBILI.resultn | <  | 1.55 ALK.times.uln         | >= | 3.579782609             |    |             | 0.001767555  | 227 |
| TBILI.resultn | >= | 1.55 ALB.resultn           | =  | Missing                 |    |             | 0.003307687  | 227 |
| TBILI.resultn | >= | 1.55 ALB.resultn           | <  | 3.545                   |    |             | 0.007697827  | 227 |
| TBILI.resultn | >= | 1.55 ALB.resultn           | >= | 3.545                   |    |             | 0.00086872   | 227 |
| TBILI.resultn | =  | Missing                    |    |                         |    | Missing     | -0.003403471 | 228 |
| TBILI.resultn | <  | 1.55                       |    |                         |    | Missing     | -0.002862902 | 228 |
| TBILI.resultn | >= | 1.55 PLT.resultn           | =  | Missing                 |    | Missing     | -0.000640389 | 228 |
| TBILI.resultn | >= | 1.55 PLT.resultn           | <  | 208                     |    | Missing     | 0.003141281  | 228 |
| TBILI.resultn | >= | 1.55 PLT.resultn           | >= | 208 ALK.times.uln       | =  | Missing     | -0.002041008 | 228 |
| TBILI.resultn | >= | 1.55 PLT.resultn           | >= | 208 ALK.times.uln       | <  | 5.002546336 | -0.00340168  | 228 |
| TBILI.resultn | >= | 1.55 PLT.resultn           | >= | 208 ALK.times.uln       | >= | 5.002546336 | 0            | 228 |
| ALB.resultn   | =  | Missing                    |    |                         |    | Missing     | -0.00262737  | 229 |
| ALB.resultn   | <  | 2.915                      |    |                         |    | Missing     | 0.000611227  | 229 |
| ALB.resultn   | >= | 2.915 ALK.times.uln        | =  | Missing age.yrs         | =  | Missing     | -0.001836806 | 229 |
| ALB.resultn   | >= | 2.915 ALK.times.uln        | =  | Missing age.yrs         | <  | 50.98151951 | -0.003401494 | 229 |
| ALB.resultn   | >= | 2.915 ALK.times.uln        | =  | Missing age.yrs         | >= | 50.98151951 | 0            | 229 |
| ALB.resultn   | >= | 2.915 ALK.times.uln        | <  | 5.446215139             |    | Missing     | -0.003168175 | 229 |
| ALB.resultn   | >= | 2.915 ALK.times.uln        | >= | 5.446215139             |    | Missing     | -0.000719035 | 229 |
| age.yrs       | =  | Missing                    |    |                         |    | Missing     | -0.005843789 | 230 |
| age.yrs       | <  | 51.63175907                |    |                         |    | Missing     | -0.006616311 | 230 |
| age.yrs       | >= | 51.63175907 AST.resultn    | =  | Missing                 |    | Missing     | -0.004252208 | 230 |
| age.yrs       | >= | 51.63175907 AST.resultn    | <  | 51.5                    |    | Missing     | -0.006848593 | 230 |
| age.yrs       | >= | 51.63175907 AST.resultn    | >= | 51.5 psc.yrs.dur        | =  | Missing     | -0.002276697 | 230 |
| age.yrs       | >= | 51.63175907 AST.resultn    | >= | 51.5 psc.yrs.dur        | <  | 0.741957563 | -0.005236403 | 230 |
| age.yrs       | >= | 51.63175907 AST.resultn    | >= | 51.5 psc.yrs.dur        | >= | 0.741957563 | 0            | 230 |
| ALK.times.uln | =  | Missing Sodium.resultn     | =  | Missing                 |    |             | 0            | 231 |

|               |    |             |                |    |             |                    |              |             |              |     |
|---------------|----|-------------|----------------|----|-------------|--------------------|--------------|-------------|--------------|-----|
| ALK.times.uln | =  | Missing     | Sodium.resultn | <  | 138.5       |                    | 1.54E-05     | 231         |              |     |
| ALK.times.uln | =  | Missing     | Sodium.resultn | >= | 138.5       |                    | 0.002660701  | 231         |              |     |
| ALK.times.uln | <  | 5.92438247  | Sodium.resultn | =  | Missing     |                    | 0.000286402  | 231         |              |     |
| ALK.times.uln | <  | 5.92438247  | Sodium.resultn | <  | 136.5       |                    | 0.004306695  | 231         |              |     |
| ALK.times.uln | <  | 5.92438247  | Sodium.resultn | >= | 136.5       |                    | 0.000497462  | 231         |              |     |
| ALK.times.uln | >= | 5.92438247  |                |    |             |                    | 0.003881756  | 231         |              |     |
| ALK.times.uln | =  | Missing     | age.yrs        | =  | Missing     |                    | -0.003639773 | 232         |              |     |
| ALK.times.uln | =  | Missing     | age.yrs        | <  | 53.55509925 |                    | -0.004730662 | 232         |              |     |
| ALK.times.uln | =  | Missing     | age.yrs        | >= | 53.55509925 |                    | -0.000883843 | 232         |              |     |
| ALK.times.uln | <  | 6.02        | age.yrs        | =  | Missing     |                    | -0.004163337 | 232         |              |     |
| ALK.times.uln | <  | 6.02        | age.yrs        | <  | 67.19644079 |                    | -0.004420333 | 232         |              |     |
| ALK.times.uln | <  | 6.02        | age.yrs        | >= | 67.19644079 |                    | 0            | 232         |              |     |
| ALK.times.uln | >= | 6.02        |                |    |             |                    | 6.51E-05     | 232         |              |     |
| TBILL.resultn | =  | Missing     |                |    |             | Missing            | -0.000264064 | 233         |              |     |
| TBILL.resultn | <  | 3.5         | Sodium.resultn | =  | Missing     | Missing            | -0.001574073 | 233         |              |     |
| TBILL.resultn | <  | 3.5         | Sodium.resultn | <  | 136.5       | Missing            | 0.002220665  | 233         |              |     |
| TBILL.resultn | <  | 3.5         | Sodium.resultn | >= | 136.5       | age.yrs            | =            | Missing     | -0.00128861  | 233 |
| TBILL.resultn | <  | 3.5         | Sodium.resultn | >= | 136.5       | age.yrs            | <            | 53.44969199 | -0.00180671  | 233 |
| TBILL.resultn | <  | 3.5         | Sodium.resultn | >= | 136.5       | age.yrs            | >=           | 53.44969199 | 0            | 233 |
| TBILL.resultn | >= | 3.5         |                |    |             | Missing            | 0.004116204  | 233         |              |     |
| psc.yrs.dur   | =  | Missing     |                |    |             | Missing            | 0.001051653  | 234         |              |     |
| psc.yrs.dur   | <  | 1.362080767 |                |    |             | Missing            | 0.000365584  | 234         |              |     |
| psc.yrs.dur   | >= | 1.362080767 | Sodium.resultn | =  | Missing     | Missing            | 0.001267544  | 234         |              |     |
| psc.yrs.dur   | >= | 1.362080767 | Sodium.resultn | <  | 138.5       | Missing            | 0.007591238  | 234         |              |     |
| psc.yrs.dur   | >= | 1.362080767 | Sodium.resultn | >= | 138.5       | age.yrs            | =            | Missing     | 0.001042395  | 234 |
| psc.yrs.dur   | >= | 1.362080767 | Sodium.resultn | >= | 138.5       | age.yrs            | <            | 38.5284052  | 0.00320737   | 234 |
| psc.yrs.dur   | >= | 1.362080767 | Sodium.resultn | >= | 138.5       | age.yrs            | >=           | 38.5284052  | 0            | 234 |
| TBILL.resultn | =  | Missing     |                |    |             |                    | -0.001825788 | 235         |              |     |
| TBILL.resultn | <  | 2.05        | psc.yrs.dur    | =  | Missing     |                    | -0.002109727 | 235         |              |     |
| TBILL.resultn | <  | 2.05        | psc.yrs.dur    | <  | 6.410677618 |                    | -0.002475098 | 235         |              |     |
| TBILL.resultn | <  | 2.05        | psc.yrs.dur    | >= | 6.410677618 |                    | 0            | 235         |              |     |
| TBILL.resultn | >= | 2.05        | ALB.resultn    | =  | Missing     |                    | -4.99E-05    | 235         |              |     |
| TBILL.resultn | >= | 2.05        | ALB.resultn    | <  | 3.41        |                    | 0.002157227  | 235         |              |     |
| TBILL.resultn | >= | 2.05        | ALB.resultn    | >= | 3.41        |                    | -0.001348143 | 235         |              |     |
| ALB.resultn   | =  | Missing     |                |    |             | Missing            | 0.000676568  | 236         |              |     |
| ALB.resultn   | <  | 2.95        |                |    |             | Missing            | 0.010134703  | 236         |              |     |
| ALB.resultn   | >= | 2.95        | TBILL.resultn  | =  | Missing     | Missing            | 0.000641444  | 236         |              |     |
| ALB.resultn   | >= | 2.95        | TBILL.resultn  | <  | 1.65        | Missing            | 0.000454477  | 236         |              |     |
| ALB.resultn   | >= | 2.95        | TBILL.resultn  | >= | 1.65        | Hemoglobin.resultn | =            | Missing     | 0.00224766   | 236 |
| ALB.resultn   | >= | 2.95        | TBILL.resultn  | >= | 1.65        | Hemoglobin.resultn | <            | 14.05       | 0.00449532   | 236 |
| ALB.resultn   | >= | 2.95        | TBILL.resultn  | >= | 1.65        | Hemoglobin.resultn | >=           | 14.05       | 0            | 236 |
| ALB.resultn   | =  | Missing     |                |    |             | Missing            | -0.003220155 | 237         |              |     |
| ALB.resultn   | <  | 2.915       |                |    |             | Missing            | 0.002312447  | 237         |              |     |
| ALB.resultn   | >= | 2.915       | TBILL.resultn  | =  | Missing     | Missing            | -0.002957063 | 237         |              |     |
| ALB.resultn   | >= | 2.915       | TBILL.resultn  | <  | 0.75        | Missing            | -0.003708113 | 237         |              |     |
| ALB.resultn   | >= | 2.915       | TBILL.resultn  | >= | 0.75        | ALK.times.uln      | =            | Missing     | 0            | 237 |
| ALB.resultn   | >= | 2.915       | TBILL.resultn  | >= | 0.75        | ALK.times.uln      | <            | 3.717252728 | -0.002547621 | 237 |
| ALB.resultn   | >= | 2.915       | TBILL.resultn  | >= | 0.75        | ALK.times.uln      | >=           | 3.717252728 | -0.003416245 | 237 |
| AST.resultn   | =  | Missing     |                |    |             | Missing            | -0.00466958  | 238         |              |     |
| AST.resultn   | <  | 57.5        |                |    |             | Missing            | -0.005465663 | 238         |              |     |
| AST.resultn   | >= | 57.5        | age.yrs        | =  | Missing     | Missing            | -0.003812778 | 238         |              |     |
| AST.resultn   | >= | 57.5        | age.yrs        | <  | 51.63175907 | Missing            | -0.004686039 | 238         |              |     |
| AST.resultn   | >= | 57.5        | age.yrs        | >= | 51.63175907 | TBILL.resultn      | =            | Missing     | -0.001655308 | 238 |
| AST.resultn   | >= | 57.5        | age.yrs        | >= | 51.63175907 | TBILL.resultn      | <            | 0.95        | -0.004552098 | 238 |
| AST.resultn   | >= | 57.5        | age.yrs        | >= | 51.63175907 | TBILL.resultn      | >=           | 0.95        | 0            | 238 |
| TBILL.resultn | =  | Missing     |                |    |             |                    | -0.000671472 | 239         |              |     |
| TBILL.resultn | <  | 1.95        | PLT.resultn    | =  | Missing     |                    | 0            | 239         |              |     |
| TBILL.resultn | <  | 1.95        | PLT.resultn    | <  | 249.5       |                    | 0.000614431  | 239         |              |     |
| TBILL.resultn | <  | 1.95        | PLT.resultn    | >= | 249.5       |                    | -0.000558737 | 239         |              |     |
| TBILL.resultn | >= | 1.95        | PLT.resultn    | =  | Missing     |                    | 0.003392221  | 239         |              |     |
| TBILL.resultn | >= | 1.95        | PLT.resultn    | <  | 219         |                    | 0.007760852  | 239         |              |     |
| TBILL.resultn | >= | 1.95        | PLT.resultn    | >= | 219         |                    | -0.000102685 | 239         |              |     |

|                |    |             |               |    |              |                    |                              |                              |
|----------------|----|-------------|---------------|----|--------------|--------------------|------------------------------|------------------------------|
| psc.yrs.dur    | =  | Missing     |               |    | Missing      | -0.008455919       | 240                          |                              |
| psc.yrs.dur    | <  | 2.140999316 |               |    | Missing      | -0.009058259       | 240                          |                              |
| psc.yrs.dur    | >= | 2.140999316 | AST.resultn   | =  | Missing      | -0.006962447       | 240                          |                              |
| psc.yrs.dur    | >= | 2.140999316 | AST.resultn   | <  | 79.5         | -0.008219932       | 240                          |                              |
| psc.yrs.dur    | >= | 2.140999316 | AST.resultn   | >= | 79.5 age.yrs | =                  | Missing -0.004218842 240     |                              |
| psc.yrs.dur    | >= | 2.140999316 | AST.resultn   | >= | 79.5 age.yrs | <                  | 47.98083504 -0.008437685 240 |                              |
| psc.yrs.dur    | >= | 2.140999316 | AST.resultn   | >= | 79.5 age.yrs | >=                 | 47.98083504 0 240            |                              |
| TBILL.resultn  | =  | Missing     |               |    | Missing      | -0.002844126       | 241                          |                              |
| TBILL.resultn  | <  | 3.75        | psc.yrs.dur   | =  | Missing      | Missing            | -0.002993767 241             |                              |
| TBILL.resultn  | <  | 3.75        | psc.yrs.dur   | <  | 2.05065024   | Missing            | -0.00367494 241              |                              |
| TBILL.resultn  | <  | 3.75        | psc.yrs.dur   | >= | 2.05065024   | AST.resultn        | =                            | Missing -0.001491452 241     |
| TBILL.resultn  | <  | 3.75        | psc.yrs.dur   | >= | 2.05065024   | AST.resultn        | <                            | 43.5 -0.003835163 241        |
| TBILL.resultn  | <  | 3.75        | psc.yrs.dur   | >= | 2.05065024   | AST.resultn        | >=                           | 43.5 0 241                   |
| TBILL.resultn  | >= | 3.75        |               |    | Missing      | -0.000150592       | 241                          |                              |
| ALB.resultn    | =  | Missing     |               |    |              | -0.000493025       | 242                          |                              |
| ALB.resultn    | <  | 3.33        | TBILL.resultn | =  | Missing      | 0.002296535        | 242                          |                              |
| ALB.resultn    | <  | 3.33        | TBILL.resultn | <  | 1.35         | -0.000445642       | 242                          |                              |
| ALB.resultn    | <  | 3.33        | TBILL.resultn | >= | 1.35         | 0.006135582        | 242                          |                              |
| ALB.resultn    | >= | 3.33        | ALK.times.uln | =  | Missing      | 0                  | 242                          |                              |
| ALB.resultn    | >= | 3.33        | ALK.times.uln | <  | 6.115825908  | -0.001317625       | 242                          |                              |
| ALB.resultn    | >= | 3.33        | ALK.times.uln | >= | 6.115825908  | 0.001463237        | 242                          |                              |
| TBILL.resultn  | =  | Missing     |               |    |              | Missing            | -0.003876722 243             |                              |
| TBILL.resultn  | <  | 1.25        |               |    |              | Missing            | -0.003563797 243             |                              |
| TBILL.resultn  | >= | 1.25        | PLT.resultn   | =  | Missing      | Missing            | -0.00069848 243              |                              |
| TBILL.resultn  | >= | 1.25        | PLT.resultn   | <  | 205          | Missing            | 0.004645977 243              |                              |
| TBILL.resultn  | >= | 1.25        | PLT.resultn   | >= | 205          | ALK.times.uln      | =                            | Missing -0.002584759 243     |
| TBILL.resultn  | >= | 1.25        | PLT.resultn   | >= | 205          | ALK.times.uln      | <                            | 5.406407841 -0.003877139 243 |
| TBILL.resultn  | >= | 1.25        | PLT.resultn   | >= | 205          | ALK.times.uln      | >=                           | 5.406407841 0 243            |
| ALB.resultn    | =  | Missing     |               |    |              | Missing            | -0.001553605 244             |                              |
| ALB.resultn    | <  | 3.31        | psc.yrs.dur   | =  | Missing      | Missing            | 0.001670666 244              |                              |
| ALB.resultn    | <  | 3.31        | psc.yrs.dur   | <  | 3.396303901  | age.yrs            | =                            | Missing -0.001419616 244     |
| ALB.resultn    | <  | 3.31        | psc.yrs.dur   | <  | 3.396303901  | age.yrs            | <                            | 43.73305955 -0.002602629 244 |
| ALB.resultn    | <  | 3.31        | psc.yrs.dur   | <  | 3.396303901  | age.yrs            | >=                           | 43.73305955 0 244            |
| ALB.resultn    | <  | 3.31        | psc.yrs.dur   | >= | 3.396303901  |                    | Missing                      | 0.008469285 244              |
| ALB.resultn    | >= | 3.31        |               |    |              | Missing            | -0.002114764 244             |                              |
| ALK.times.uln  | =  | Missing     | ALB.resultn   | =  | Missing      | 1.85E-05           | 245                          |                              |
| ALK.times.uln  | =  | Missing     | ALB.resultn   | <  | 3.95         | 0.004208568        | 245                          |                              |
| ALK.times.uln  | =  | Missing     | ALB.resultn   | >= | 3.95         | 2.32E-05           | 245                          |                              |
| ALK.times.uln  | <  | 5.462893197 | PLT.resultn   | =  | Missing      | 0                  | 245                          |                              |
| ALK.times.uln  | <  | 5.462893197 | PLT.resultn   | <  | 195          | 0.00283835         | 245                          |                              |
| ALK.times.uln  | <  | 5.462893197 | PLT.resultn   | >= | 195          | 0.000112683        | 245                          |                              |
| ALK.times.uln  | >= | 5.462893197 |               |    |              | 0.00350094         | 245                          |                              |
| Sodium.resultn | =  | Missing     | TBILL.resultn | =  | Missing      | 0                  | 246                          |                              |
| Sodium.resultn | =  | Missing     | TBILL.resultn | <  | 1.25         | 9.02E-06           | 246                          |                              |
| Sodium.resultn | =  | Missing     | TBILL.resultn | >= | 1.25         | 0.002739598        | 246                          |                              |
| Sodium.resultn | <  | 136.5       |               |    |              | 0.00499527         | 246                          |                              |
| Sodium.resultn | >= | 136.5       | ALB.resultn   | =  | Missing      | 0.001005712        | 246                          |                              |
| Sodium.resultn | >= | 136.5       | ALB.resultn   | <  | 3.165        | 0.00527202         | 246                          |                              |
| Sodium.resultn | >= | 136.5       | ALB.resultn   | >= | 3.165        | 0.000661655        | 246                          |                              |
| ALB.resultn    | =  | Missing     |               |    |              | Missing            | -0.005844855 247             |                              |
| ALB.resultn    | <  | 3.105       |               |    |              | Missing            | -0.00086849 247              |                              |
| ALB.resultn    | >= | 3.105       | TBILL.resultn | =  | Missing      | Missing            | -0.005136123 247             |                              |
| ALB.resultn    | >= | 3.105       | TBILL.resultn | <  | 1.05         | Missing            | -0.005849791 247             |                              |
| ALB.resultn    | >= | 3.105       | TBILL.resultn | >= | 1.05         | Hemoglobin.resultn | =                            | Missing 0 247                |
| ALB.resultn    | >= | 3.105       | TBILL.resultn | >= | 1.05         | Hemoglobin.resultn | <                            | 13.75 -0.002693992 247       |
| ALB.resultn    | >= | 3.105       | TBILL.resultn | >= | 1.05         | Hemoglobin.resultn | >=                           | 13.75 -0.005334428 247       |
| TBILL.resultn  | =  | Missing     |               |    |              |                    | 0.001123307 248              |                              |
| TBILL.resultn  | <  | 1.95        | ALK.times.uln | =  | Missing      | 0                  | 248                          |                              |
| TBILL.resultn  | <  | 1.95        | ALK.times.uln | <  | 5.372999904  | 1.76E-05           | 248                          |                              |
| TBILL.resultn  | <  | 1.95        | ALK.times.uln | >= | 5.372999904  | 0.00310852         | 248                          |                              |
| TBILL.resultn  | >= | 1.95        | ALB.resultn   | =  | Missing      | 0.003579044        | 248                          |                              |
| TBILL.resultn  | >= | 1.95        | ALB.resultn   | <  | 3.35         | 0.006459899        | 248                          |                              |

|               |    |             |                    |    |                  |         |             |              |              |     |
|---------------|----|-------------|--------------------|----|------------------|---------|-------------|--------------|--------------|-----|
| TBILL.resultn | >= | 1.95        | ALB.resultn        | >= | 3.35             |         |             | 0.001178332  | 248          |     |
| ALB.resultn   | =  | Missing     |                    |    |                  |         | Missing     | -0.003205435 | 249          |     |
| ALB.resultn   | <  | 3.135       |                    |    |                  |         | Missing     | 0.000382284  | 249          |     |
| ALB.resultn   | >= | 3.135       | TBILL.resultn      | =  | Missing          |         | Missing     | -0.003376243 | 249          |     |
| ALB.resultn   | >= | 3.135       | TBILL.resultn      | <  | 0.85             |         | Missing     | -0.004096523 | 249          |     |
| ALB.resultn   | >= | 3.135       | TBILL.resultn      | >= | 0.85 age.yrs     | =       | Missing     | -0.002317518 | 249          |     |
| ALB.resultn   | >= | 3.135       | TBILL.resultn      | >= | 0.85 age.yrs     | <       | 53.35934292 | -0.003629321 | 249          |     |
| ALB.resultn   | >= | 3.135       | TBILL.resultn      | >= | 0.85 age.yrs     | >=      | 53.35934292 | 0            | 249          |     |
| ALK.times.uln | =  | Missing     | TBILL.resultn      | =  | Missing          |         | Missing     | -0.007511337 | 250          |     |
| ALK.times.uln | =  | Missing     | TBILL.resultn      | <  | 0.95             |         | Missing     | -0.007522449 | 250          |     |
| ALK.times.uln | =  | Missing     | TBILL.resultn      | >= | 0.95 age.yrs     | =       | Missing     | -0.003705655 | 250          |     |
| ALK.times.uln | =  | Missing     | TBILL.resultn      | >= | 0.95 age.yrs     | <       | 49.58521561 | -0.00741131  | 250          |     |
| ALK.times.uln | =  | Missing     | TBILL.resultn      | >= | 0.95 age.yrs     | >=      | 49.58521561 | 0            | 250          |     |
| ALK.times.uln | <  | 5.963877551 |                    |    |                  |         | Missing     | -0.006957016 | 250          |     |
| ALK.times.uln | >= | 5.963877551 |                    |    |                  |         | Missing     | -0.003941577 | 250          |     |
| ALK.times.uln | =  | Missing     | age.yrs            | =  | Missing          |         |             | -0.002285059 | 251          |     |
| ALK.times.uln | =  | Missing     | age.yrs            | <  | 53.46475017      |         |             | -0.003278562 | 251          |     |
| ALK.times.uln | =  | Missing     | age.yrs            | >= | 53.46475017      |         |             | 0            | 251          |     |
| ALK.times.uln | <  | 5.446215139 |                    |    |                  |         |             | -0.002754526 | 251          |     |
| ALK.times.uln | >= | 5.446215139 | age.yrs            | =  | Missing          |         |             | -0.000284007 | 251          |     |
| ALK.times.uln | >= | 5.446215139 | age.yrs            | <  | 45.51813826      |         |             | -0.001880679 | 251          |     |
| ALK.times.uln | >= | 5.446215139 | age.yrs            | >= | 45.51813826      |         |             | 0.001951334  | 251          |     |
| ALB.resultn   | =  | Missing     |                    |    |                  |         |             | 0.000141829  | 252          |     |
| ALB.resultn   | <  | 3.33        | psc.yrs.dur        | =  | Missing          |         |             | 0.004657747  | 252          |     |
| ALB.resultn   | <  | 3.33        | psc.yrs.dur        | <  | 1.865845311      |         |             | 0.00078337   | 252          |     |
| ALB.resultn   | <  | 3.33        | psc.yrs.dur        | >= | 1.865845311      |         |             | 0.010856749  | 252          |     |
| ALB.resultn   | >= | 3.33        | Sodium.resultn     | =  | Missing          |         |             | 0            | 252          |     |
| ALB.resultn   | >= | 3.33        | Sodium.resultn     | <  | 136.5            |         |             | 0.003094728  | 252          |     |
| ALB.resultn   | >= | 3.33        | Sodium.resultn     | >= | 136.5            |         |             | -3.92E-05    | 252          |     |
| ALB.resultn   | =  | Missing     |                    |    |                  |         |             | 1.18E-05     | 253          |     |
| ALB.resultn   | <  | 3.225       | Hemoglobin.resultn | =  | Missing          |         |             | 0.00284352   | 253          |     |
| ALB.resultn   | <  | 3.225       | Hemoglobin.resultn | <  | 12               |         |             | 0.004593111  | 253          |     |
| ALB.resultn   | <  | 3.225       | Hemoglobin.resultn | >= | 12               |         |             | 0.00091897   | 253          |     |
| ALB.resultn   | >= | 3.225       | PLT.resultn        | =  | Missing          |         |             | 0            | 253          |     |
| ALB.resultn   | >= | 3.225       | PLT.resultn        | <  | 268              |         |             | 0.001916124  | 253          |     |
| ALB.resultn   | >= | 3.225       | PLT.resultn        | >= | 268              |         |             | 7.90E-06     | 253          |     |
| ALB.resultn   | =  | Missing     |                    |    |                  |         | Missing     | -0.003688773 | 254          |     |
| ALB.resultn   | <  | 2.95        |                    |    |                  |         | Missing     | 0.002222036  | 254          |     |
| ALB.resultn   | >= | 2.95        | ALK.times.uln      | =  | Missing          | age.yrs | =           | Missing      | -0.002463736 | 254 |
| ALB.resultn   | >= | 2.95        | ALK.times.uln      | =  | Missing          | age.yrs | <           | 51.56605065  | -0.003695603 | 254 |
| ALB.resultn   | >= | 2.95        | ALK.times.uln      | =  | Missing          | age.yrs | >=          | 51.56605065  | 0            | 254 |
| ALB.resultn   | >= | 2.95        | ALK.times.uln      | <  | 5.336800235      |         |             | Missing      | -0.003317742 | 254 |
| ALB.resultn   | >= | 2.95        | ALK.times.uln      | >= | 5.336800235      |         |             | Missing      | -9.01E-05    | 254 |
| TBILL.resultn | =  | Missing     |                    |    |                  |         |             | 2.33E-05     | 255          |     |
| TBILL.resultn | <  | 1.25        | Sodium.resultn     | =  | Missing          |         |             | 0            | 255          |     |
| TBILL.resultn | <  | 1.25        | Sodium.resultn     | <  | 137.5            |         |             | 0.002592863  | 255          |     |
| TBILL.resultn | <  | 1.25        | Sodium.resultn     | >= | 137.5            |         |             | 0.000146103  | 255          |     |
| TBILL.resultn | >= | 1.25        | ALB.resultn        | =  | Missing          |         |             | 0.002879115  | 255          |     |
| TBILL.resultn | >= | 1.25        | ALB.resultn        | <  | 3.59             |         |             | 0.006470413  | 255          |     |
| TBILL.resultn | >= | 1.25        | ALB.resultn        | >= | 3.59             |         |             | 0.00113477   | 255          |     |
| ALB.resultn   | =  | Missing     |                    |    |                  |         | Missing     | 0.000395437  | 256          |     |
| ALB.resultn   | <  | 3.225       |                    |    |                  |         | Missing     | 0.00297367   | 256          |     |
| ALB.resultn   | >= | 3.225       | TBILL.resultn      | =  | Missing          |         | Missing     | 4.91E-05     | 256          |     |
| ALB.resultn   | >= | 3.225       | TBILL.resultn      | <  | 0.95             |         | Missing     | -0.000569397 | 256          |     |
| ALB.resultn   | >= | 3.225       | TBILL.resultn      | >= | 0.95 PLT.resultn | =       | Missing     | 0.001023299  | 256          |     |
| ALB.resultn   | >= | 3.225       | TBILL.resultn      | >= | 0.95 PLT.resultn | <       | 247.5       | 0.002988033  | 256          |     |
| ALB.resultn   | >= | 3.225       | TBILL.resultn      | >= | 0.95 PLT.resultn | >=      | 247.5       | 0            | 256          |     |
| ALB.resultn   | =  | Missing     |                    |    |                  |         | Missing     | -0.006471572 | 257          |     |
| ALB.resultn   | <  | 2.915       |                    |    |                  |         | Missing     | -0.002277642 | 257          |     |
| ALB.resultn   | >= | 2.915       | TBILL.resultn      | =  | Missing          |         | Missing     | -0.006202411 | 257          |     |
| ALB.resultn   | >= | 2.915       | TBILL.resultn      | <  | 1.55             |         | Missing     | -0.006525984 | 257          |     |
| ALB.resultn   | >= | 2.915       | TBILL.resultn      | >= | 1.55 psc.yrs.dur | =       | Missing     | -0.004382313 | 257          |     |

|                |    |         |                    |    |             |               |         |             |              |     |
|----------------|----|---------|--------------------|----|-------------|---------------|---------|-------------|--------------|-----|
| ALB.resultn    | >= | 2.915   | TBILL.resultn      | >= | 1.55        | psc.yrs.dur   | <       | 5.107460643 | -0.006374273 | 257 |
| ALB.resultn    | >= | 2.915   | TBILL.resultn      | >= | 1.55        | psc.yrs.dur   | >=      | 5.107460643 | 0            | 257 |
| TBILL.resultn  | =  | Missing |                    |    |             |               |         |             | -0.000223089 | 258 |
| TBILL.resultn  | <  | 1.65    | Sodium.resultn     | =  | Missing     |               |         |             | 0            | 258 |
| TBILL.resultn  | <  | 1.65    | Sodium.resultn     | <  | 142.5       |               |         |             | 0.000264526  | 258 |
| TBILL.resultn  | <  | 1.65    | Sodium.resultn     | >= | 142.5       |               |         |             | 0.002286887  | 258 |
| TBILL.resultn  | >= | 1.65    | Hemoglobin.resultn | =  | Missing     |               |         |             | 0.002009594  | 258 |
| TBILL.resultn  | >= | 1.65    | Hemoglobin.resultn | <  | 12.75       |               |         |             | 0.004245201  | 258 |
| TBILL.resultn  | >= | 1.65    | Hemoglobin.resultn | >= | 12.75       |               |         |             | -0.000226014 | 258 |
| TBILL.resultn  | =  | Missing |                    |    |             |               |         |             | 0.000812386  | 259 |
| TBILL.resultn  | <  | 2.35    | Sodium.resultn     | =  | Missing     |               |         |             | 0            | 259 |
| TBILL.resultn  | <  | 2.35    | Sodium.resultn     | <  | 137.5       |               |         |             | 0.00172928   | 259 |
| TBILL.resultn  | <  | 2.35    | Sodium.resultn     | >= | 137.5       |               |         |             | 0.000447625  | 259 |
| TBILL.resultn  | >= | 2.35    | ALB.resultn        | =  | Missing     |               |         |             | 0.003434835  | 259 |
| TBILL.resultn  | >= | 2.35    | ALB.resultn        | <  | 3.445       |               |         |             | 0.005002068  | 259 |
| TBILL.resultn  | >= | 2.35    | ALB.resultn        | >= | 3.445       |               |         |             | 0.002229271  | 259 |
| TBILL.resultn  | =  | Missing |                    |    |             |               | Missing |             | 0.001195614  | 260 |
| TBILL.resultn  | <  | 1.65    |                    |    |             |               | Missing |             | 0.00028952   | 260 |
| TBILL.resultn  | >= | 1.65    | PLT.resultn        | =  | Missing     |               | Missing |             | 0.003806347  | 260 |
| TBILL.resultn  | >= | 1.65    | PLT.resultn        | <  | 219         |               | Missing |             | 0.010238766  | 260 |
| TBILL.resultn  | >= | 1.65    | PLT.resultn        | >= | 219         | TBILL.resultn | =       | Missing     | 0.001126173  | 260 |
| TBILL.resultn  | >= | 1.65    | PLT.resultn        | >= | 219         | TBILL.resultn | <       | 2.2         | 0.002702815  | 260 |
| TBILL.resultn  | >= | 1.65    | PLT.resultn        | >= | 219         | TBILL.resultn | >=      | 2.2         | 0            | 260 |
| ALB.resultn    | =  | Missing |                    |    |             |               |         |             | -0.00087094  | 261 |
| ALB.resultn    | <  | 3.31    | psc.yrs.dur        | =  | Missing     |               |         |             | 0.003418771  | 261 |
| ALB.resultn    | <  | 3.31    | psc.yrs.dur        | <  | 0.739219713 |               |         |             | -1.75E-05    | 261 |
| ALB.resultn    | <  | 3.31    | psc.yrs.dur        | >= | 0.739219713 |               |         |             | 0.006854992  | 261 |
| ALB.resultn    | >= | 3.31    | ALK.times.uln      | =  | Missing     |               |         |             | 0            | 261 |
| ALB.resultn    | >= | 3.31    | ALK.times.uln      | <  | 6.02        |               |         |             | -0.000586652 | 261 |
| ALB.resultn    | >= | 3.31    | ALK.times.uln      | >= | 6.02        |               |         |             | 0.001927324  | 261 |
| Sodium.resultn | =  | Missing | TBILL.resultn      | =  | Missing     |               |         |             | -0.000135932 | 262 |
| Sodium.resultn | =  | Missing | TBILL.resultn      | <  | 1.55        |               |         |             | -0.000480139 | 262 |
| Sodium.resultn | =  | Missing | TBILL.resultn      | >= | 1.55        |               |         |             | 0.002342363  | 262 |
| Sodium.resultn | <  | 136.5   |                    |    |             |               |         |             | 0.004511814  | 262 |
| Sodium.resultn | >= | 136.5   | ALB.resultn        | =  | Missing     |               |         |             | 0.000186609  | 262 |
| Sodium.resultn | >= | 136.5   | ALB.resultn        | <  | 3.13        |               |         |             | 0.002391993  | 262 |
| Sodium.resultn | >= | 136.5   | ALB.resultn        | >= | 3.13        |               |         |             | 0            | 262 |
| ALB.resultn    | =  | Missing |                    |    |             |               |         |             | -0.000703327 | 263 |
| ALB.resultn    | <  | 3.31    | TBILL.resultn      | =  | Missing     |               |         |             | 0.004119994  | 263 |
| ALB.resultn    | <  | 3.31    | TBILL.resultn      | <  | 1.5         |               |         |             | 0.001354688  | 263 |
| ALB.resultn    | <  | 3.31    | TBILL.resultn      | >= | 1.5         |               |         |             | 0.0068853    | 263 |
| ALB.resultn    | >= | 3.31    | PLT.resultn        | =  | Missing     |               |         |             | 0            | 263 |
| ALB.resultn    | >= | 3.31    | PLT.resultn        | <  | 205.5       |               |         |             | 0.001110391  | 263 |
| ALB.resultn    | >= | 3.31    | PLT.resultn        | >= | 205.5       |               |         |             | -0.00059332  | 263 |
| TBILL.resultn  | =  | Missing |                    |    |             |               |         |             | -7.88E-06    | 264 |
| TBILL.resultn  | <  | 2.05    | PLT.resultn        | =  | Missing     |               |         |             | 0            | 264 |
| TBILL.resultn  | <  | 2.05    | PLT.resultn        | <  | 209.5       |               |         |             | 0.00137433   | 264 |
| TBILL.resultn  | <  | 2.05    | PLT.resultn        | >= | 209.5       |               |         |             | 9.89E-06     | 264 |
| TBILL.resultn  | >= | 2.05    | ALB.resultn        | =  | Missing     |               |         |             | 0.004685728  | 264 |
| TBILL.resultn  | >= | 2.05    | ALB.resultn        | <  | 3.35        |               |         |             | 0.008016516  | 264 |
| TBILL.resultn  | >= | 2.05    | ALB.resultn        | >= | 3.35        |               |         |             | 0.002306594  | 264 |
| TBILL.resultn  | =  | Missing |                    |    |             |               | Missing |             | -0.001027332 | 265 |
| TBILL.resultn  | <  | 1.31    |                    |    |             |               | Missing |             | -0.001853184 | 265 |
| TBILL.resultn  | >= | 1.31    | age.yrs            | =  | Missing     |               | Missing |             | 0.000336653  | 265 |
| TBILL.resultn  | >= | 1.31    | age.yrs            | <  | 51.10746064 |               | Missing |             | -0.001262645 | 265 |
| TBILL.resultn  | >= | 1.31    | age.yrs            | >= | 51.10746064 | ALB.resultn   | =       | Missing     | 0.003078307  | 265 |
| TBILL.resultn  | >= | 1.31    | age.yrs            | >= | 51.10746064 | ALB.resultn   | <       | 3.755       | 0.006156614  | 265 |
| TBILL.resultn  | >= | 1.31    | age.yrs            | >= | 51.10746064 | ALB.resultn   | >=      | 3.755       | 0            | 265 |
| TBILL.resultn  | =  | Missing |                    |    |             |               |         |             | 0.000803581  | 266 |
| TBILL.resultn  | <  | 1.95    | Sodium.resultn     | =  | Missing     |               |         |             | 0            | 266 |
| TBILL.resultn  | <  | 1.95    | Sodium.resultn     | <  | 137.5       |               |         |             | 0.00220939   | 266 |
| TBILL.resultn  | <  | 1.95    | Sodium.resultn     | >= | 137.5       |               |         |             | 0.000452873  | 266 |

|               |    |                           |               |                         |         |         |              |     |
|---------------|----|---------------------------|---------------|-------------------------|---------|---------|--------------|-----|
| TBILI.resultn | >= | 1.95 Hemoglobin.resultn   | =             | Missing                 |         |         | 0.00273395   | 266 |
| TBILI.resultn | >= | 1.95 Hemoglobin.resultn   | <             | 13.35                   |         |         | 0.004568343  | 266 |
| TBILI.resultn | >= | 1.95 Hemoglobin.resultn   | >=            | 13.35                   |         |         | 0.000899556  | 266 |
| ALB.resultn   | =  | Missing                   |               |                         |         | Missing | -0.003864193 | 267 |
| ALB.resultn   | <  | 2.965                     |               |                         |         | Missing | 0.001746018  | 267 |
| ALB.resultn   | >= | 2.965 PLT.resultn         | =             | Missing                 |         | Missing | -0.004396945 | 267 |
| ALB.resultn   | >= | 2.965 PLT.resultn         | <             | 209.5 AST.resultn       | =       | Missing | -0.002129175 | 267 |
| ALB.resultn   | >= | 2.965 PLT.resultn         | <             | 209.5 AST.resultn       | <       | 65.5    | -0.004383596 | 267 |
| ALB.resultn   | >= | 2.965 PLT.resultn         | <             | 209.5 AST.resultn       | >=      | 65.5    | 0            | 267 |
| ALB.resultn   | >= | 2.965 PLT.resultn         | >=            | 209.5                   |         | Missing | -0.003957542 | 267 |
| ALK.times.uln | =  | Missing                   |               |                         |         |         | -0.001022283 | 268 |
| ALK.times.uln | <  | 5.446215139 PLT.resultn   | =             | Missing                 |         |         | -0.001018603 | 268 |
| ALK.times.uln | <  | 5.446215139 PLT.resultn   | <             | 185.5                   |         |         | -0.003074855 | 268 |
| ALK.times.uln | <  | 5.446215139 PLT.resultn   | >=            | 185.5                   |         |         | -0.001512318 | 268 |
| ALK.times.uln | >= | 5.446215139 ALK.times.uln | =             | Missing                 |         |         | 0.002001657  | 268 |
| ALK.times.uln | >= | 5.446215139 ALK.times.uln | <             | 7.801810865             |         |         | 0.003821345  | 268 |
| ALK.times.uln | >= | 5.446215139 ALK.times.uln | >=            | 7.801810865             |         |         | 0            | 268 |
| TBILI.resultn | =  | Missing                   |               |                         |         |         | 0.001329713  | 269 |
| TBILI.resultn | <  | 1.95 Sodium.resultn       | =             | Missing                 |         |         | 0            | 269 |
| TBILI.resultn | <  | 1.95 Sodium.resultn       | <             | 136.5                   |         |         | 0.00350414   | 269 |
| TBILI.resultn | <  | 1.95 Sodium.resultn       | >=            | 136.5                   |         |         | 0.000433698  | 269 |
| TBILI.resultn | >= | 1.95 PLT.resultn          | =             | Missing                 |         |         | 0.002692935  | 269 |
| TBILI.resultn | >= | 1.95 PLT.resultn          | <             | 220.5                   |         |         | 0.00627981   | 269 |
| TBILI.resultn | >= | 1.95 PLT.resultn          | >=            | 220.5                   |         |         | 2.78E-06     | 269 |
| ALB.resultn   | =  | Missing                   |               |                         |         |         | -0.001445262 | 270 |
| ALB.resultn   | <  | 3.34 TBILI.resultn        | =             | Missing                 |         |         | 0.001857936  | 270 |
| ALB.resultn   | <  | 3.34 TBILI.resultn        | <             | 1.2                     |         |         | -0.000545841 | 270 |
| ALB.resultn   | <  | 3.34 TBILI.resultn        | >=            | 1.2                     |         |         | 0.004742469  | 270 |
| ALB.resultn   | >= | 3.34 age.yrs              | =             | Missing                 |         |         | -0.001201115 | 270 |
| ALB.resultn   | >= | 3.34 age.yrs              | <             | 53.29226557             |         |         | -0.001719583 | 270 |
| ALB.resultn   | >= | 3.34 age.yrs              | >=            | 53.29226557             |         |         | 0            | 270 |
| ALK.times.uln | =  | Missing                   | TBILI.resultn | =                       | Missing |         | -0.002100472 | 271 |
| ALK.times.uln | =  | Missing                   | TBILI.resultn | <                       | 1.65    |         | -0.002619488 | 271 |
| ALK.times.uln | =  | Missing                   | TBILI.resultn | >=                      | 1.65    |         | 0.000287001  | 271 |
| ALK.times.uln | <  | 6.02 TBILI.resultn        | =             | Missing                 |         |         | -0.003019088 | 271 |
| ALK.times.uln | <  | 6.02 TBILI.resultn        | <             | 2.85                    |         |         | -0.003220361 | 271 |
| ALK.times.uln | <  | 6.02 TBILI.resultn        | >=            | 2.85                    |         |         | 0            | 271 |
| ALK.times.uln | >= | 6.02                      |               |                         |         |         | 0.000152478  | 271 |
| ALK.times.uln | =  | Missing                   | PLT.resultn   | =                       | Missing |         | 0            | 272 |
| ALK.times.uln | =  | Missing                   | PLT.resultn   | <                       | 219     |         | 0.00350949   | 272 |
| ALK.times.uln | =  | Missing                   | PLT.resultn   | >=                      | 219     |         | -4.02E-06    | 272 |
| ALK.times.uln | <  | 5.92438247 ALB.resultn    | =             | Missing                 |         |         | 0.000867483  | 272 |
| ALK.times.uln | <  | 5.92438247 ALB.resultn    | <             | 3.34                    |         |         | 0.003479224  | 272 |
| ALK.times.uln | <  | 5.92438247 ALB.resultn    | >=            | 3.34                    |         |         | 0.000482156  | 272 |
| ALK.times.uln | >= | 5.92438247                |               |                         |         |         | 0.003380857  | 272 |
| TBILI.resultn | =  | Missing                   |               |                         |         |         | -0.000145592 | 273 |
| TBILI.resultn | <  | 1.95 ALK.times.uln        | =             | Missing                 |         |         | 0            | 273 |
| TBILI.resultn | <  | 1.95 ALK.times.uln        | <             | 2.822501299             |         |         | -0.000906498 | 273 |
| TBILI.resultn | <  | 1.95 ALK.times.uln        | >=            | 2.822501299             |         |         | 0.000484524  | 273 |
| TBILI.resultn | >= | 1.95 PLT.resultn          | =             | Missing                 |         |         | 0.00247223   | 273 |
| TBILI.resultn | >= | 1.95 PLT.resultn          | <             | 219                     |         |         | 0.005249857  | 273 |
| TBILI.resultn | >= | 1.95 PLT.resultn          | >=            | 219                     |         |         | 0.000674942  | 273 |
| ALB.resultn   | =  | Missing                   |               |                         |         | Missing | -0.000658353 | 274 |
| ALB.resultn   | <  | 3.13                      |               |                         |         | Missing | 0.002959303  | 274 |
| ALB.resultn   | >= | 3.13 TBILI.resultn        | =             | Missing                 |         | Missing | -0.000668449 | 274 |
| ALB.resultn   | >= | 3.13 TBILI.resultn        | <             | 2.05 Hemoglobin.resultn | =       | Missing | 0            | 274 |
| ALB.resultn   | >= | 3.13 TBILI.resultn        | <             | 2.05 Hemoglobin.resultn | <       | 11.85   | -0.000476716 | 274 |
| ALB.resultn   | >= | 3.13 TBILI.resultn        | <             | 2.05 Hemoglobin.resultn | >=      | 11.85   | -0.001222231 | 274 |
| ALB.resultn   | >= | 3.13 TBILI.resultn        | >=            | 2.05                    |         | Missing | 0.001726823  | 274 |
| TBILI.resultn | =  | Missing                   |               |                         |         |         | -0.000259476 | 275 |
| TBILI.resultn | <  | 1.65 ALK.times.uln        | =             | Missing                 |         |         | 0            | 275 |
| TBILI.resultn | <  | 1.65 ALK.times.uln        | <             | 5.963877551             |         |         | -0.000879885 | 275 |



|               |    |                     |         |                         |                           |         |              |              |     |
|---------------|----|---------------------|---------|-------------------------|---------------------------|---------|--------------|--------------|-----|
| TBILL.resultn | <  | 1.65 ALK.times.uln  | >=      | 5.963877551             |                           |         | 0.001854849  | 275          |     |
| TBILL.resultn | >= | 1.65 PLT.resultn    | =       | Missing                 |                           |         | 0.002606415  | 275          |     |
| TBILL.resultn | >= | 1.65 PLT.resultn    | <       | 217                     |                           |         | 0.006610981  | 275          |     |
| TBILL.resultn | >= | 1.65 PLT.resultn    | >=      | 217                     |                           |         | 0.000699479  | 275          |     |
| TBILL.resultn | =  | Missing             |         |                         |                           |         | 0.000116179  | 276          |     |
| TBILL.resultn | <  | 1.55 AST.resultn    | =       | Missing                 |                           |         | -0.00045283  | 276          |     |
| TBILL.resultn | <  | 1.55 AST.resultn    | <       | 47.5                    |                           |         | -0.00090566  | 276          |     |
| TBILL.resultn | <  | 1.55 AST.resultn    | >=      | 47.5                    |                           |         | 0            | 276          |     |
| TBILL.resultn | >= | 1.55 AST.resultn    | =       | Missing                 |                           |         | 0.001778848  | 276          |     |
| TBILL.resultn | >= | 1.55 AST.resultn    | <       | 98.5                    |                           |         | -0.000258104 | 276          |     |
| TBILL.resultn | >= | 1.55 AST.resultn    | >=      | 98.5                    |                           |         | 0.004175261  | 276          |     |
| ALB.resultn   | =  | Missing             |         |                         |                           | Missing | -0.004383363 | 277          |     |
| ALB.resultn   | <  | 2.915               |         |                         |                           | Missing | 0.000683054  | 277          |     |
| ALB.resultn   | >= | 2.915 psc.yrs.dur   | =       | Missing                 |                           | Missing | -0.00406269  | 277          |     |
| ALB.resultn   | >= | 2.915 psc.yrs.dur   | <       | 6.410677618             |                           | Missing | -0.004407766 | 277          |     |
| ALB.resultn   | >= | 2.915 psc.yrs.dur   | >=      | 6.410677618 AST.resultn | =                         | Missing | -0.002003365 | 277          |     |
| ALB.resultn   | >= | 2.915 psc.yrs.dur   | >=      | 6.410677618 AST.resultn | <                         | 44      | -0.004777256 | 277          |     |
| ALB.resultn   | >= | 2.915 psc.yrs.dur   | >=      | 6.410677618 AST.resultn | >=                        | 44      | 0            | 277          |     |
| PLT.resultn   | =  | Missing             |         |                         |                           | Missing | -0.005285727 | 278          |     |
| PLT.resultn   | <  | 249.5 ALK.times.uln | =       | Missing                 | TBILL.resultn             | =       | Missing      | -0.003168757 | 278 |
| PLT.resultn   | <  | 249.5 ALK.times.uln | =       | Missing                 | TBILL.resultn             | <       | 0.95         | -0.005915014 | 278 |
| PLT.resultn   | <  | 249.5 ALK.times.uln | =       | Missing                 | TBILL.resultn             | >=      | 0.95         | 0            | 278 |
| PLT.resultn   | <  | 249.5 ALK.times.uln | <       | 4.342610778             |                           | Missing | -0.00482415  | 278          |     |
| PLT.resultn   | <  | 249.5 ALK.times.uln | >=      | 4.342610778             |                           | Missing | 0.000938721  | 278          |     |
| PLT.resultn   | >= | 249.5               |         |                         |                           | Missing | -0.005654138 | 278          |     |
| ALB.resultn   | =  | Missing             |         |                         |                           | Missing | 0.000667957  | 279          |     |
| ALB.resultn   | <  | 2.95                |         |                         |                           | Missing | 0.004483468  | 279          |     |
| ALB.resultn   | >= | 2.95 TBILL.resultn  | =       | Missing                 |                           | Missing | -0.000211854 | 279          |     |
| ALB.resultn   | >= | 2.95 TBILL.resultn  | <       | 1.25                    |                           | Missing | -0.000585365 | 279          |     |
| ALB.resultn   | >= | 2.95 TBILL.resultn  | >=      | 1.25 PLT.resultn        | =                         | Missing | 0.000813718  | 279          |     |
| ALB.resultn   | >= | 2.95 TBILL.resultn  | >=      | 1.25 PLT.resultn        | <                         | 208.5   | 0.004556819  | 279          |     |
| ALB.resultn   | >= | 2.95 TBILL.resultn  | >=      | 1.25 PLT.resultn        | >=                        | 208.5   | 0            | 279          |     |
| TBILL.resultn | =  | Missing             |         |                         |                           |         | -0.007131788 | 280          |     |
| TBILL.resultn | <  | 1.95 age.yrs        | =       | Missing                 |                           |         | -0.006197531 | 280          |     |
| TBILL.resultn | <  | 1.95 age.yrs        | <       | 69.76043806             |                           |         | -0.006640212 | 280          |     |
| TBILL.resultn | <  | 1.95 age.yrs        | >=      | 69.76043806             |                           |         | 0            | 280          |     |
| TBILL.resultn | >= | 1.95 ALK.times.uln  | =       | Missing                 |                           |         | -0.004784337 | 280          |     |
| TBILL.resultn | >= | 1.95 ALK.times.uln  | <       | 3.844621514             |                           |         | -0.007142317 | 280          |     |
| TBILL.resultn | >= | 1.95 ALK.times.uln  | >=      | 3.844621514             |                           |         | -0.003055151 | 280          |     |
| ALK.times.uln | =  | Missing             | age.yrs | =                       | Missing                   |         | Missing      | -0.006824583 | 281 |
| ALK.times.uln | =  | Missing             | age.yrs | <                       | 53.46475017               |         | Missing      | -0.008021832 | 281 |
| ALK.times.uln | =  | Missing             | age.yrs | >=                      | 53.46475017 TBILL.resultn | =       | Missing      | -0.004375665 | 281 |
| ALK.times.uln | =  | Missing             | age.yrs | >=                      | 53.46475017 TBILL.resultn | <       | 0.75         | -0.008022053 | 281 |
| ALK.times.uln | =  | Missing             | age.yrs | >=                      | 53.46475017 TBILL.resultn | >=      | 0.75         | 0            | 281 |
| ALK.times.uln | <  | 6.068877551         |         |                         |                           | Missing | -0.00749859  | 281          |     |
| ALK.times.uln | >= | 6.068877551         |         |                         |                           | Missing | -0.004768716 | 281          |     |
| ALB.resultn   | =  | Missing             |         |                         |                           |         | -0.000235558 | 282          |     |
| ALB.resultn   | <  | 3.225 TBILL.resultn | =       | Missing                 |                           |         | 0.001671078  | 282          |     |
| ALB.resultn   | <  | 3.225 TBILL.resultn | <       | 1.31                    |                           |         | -0.000353433 | 282          |     |
| ALB.resultn   | <  | 3.225 TBILL.resultn | >=      | 1.31                    |                           |         | 0.00369559   | 282          |     |
| ALB.resultn   | >= | 3.225 AST.resultn   | =       | Missing                 |                           |         | -0.000582129 | 282          |     |
| ALB.resultn   | >= | 3.225 AST.resultn   | <       | 52                      |                           |         | -0.001224896 | 282          |     |
| ALB.resultn   | >= | 3.225 AST.resultn   | >=      | 52                      |                           |         | 0            | 282          |     |
| ALB.resultn   | =  | Missing             |         |                         |                           | Missing | -5.47E-05    | 283          |     |
| ALB.resultn   | <  | 2.95                |         |                         |                           | Missing | 0.006536958  | 283          |     |
| ALB.resultn   | >= | 2.95 TBILL.resultn  | =       | Missing                 |                           | Missing | -0.00014087  | 283          |     |
| ALB.resultn   | >= | 2.95 TBILL.resultn  | <       | 0.85                    |                           | Missing | -0.000626604 | 283          |     |
| ALB.resultn   | >= | 2.95 TBILL.resultn  | >=      | 0.85 PLT.resultn        | =                         | Missing | 0.000670662  | 283          |     |
| ALB.resultn   | >= | 2.95 TBILL.resultn  | >=      | 0.85 PLT.resultn        | <                         | 212     | 0.002717945  | 283          |     |
| ALB.resultn   | >= | 2.95 TBILL.resultn  | >=      | 0.85 PLT.resultn        | >=                        | 212     | 0            | 283          |     |
| age.yrs       | =  | Missing             |         |                         |                           | Missing | -0.009358696 | 284          |     |
| age.yrs       | <  | 51.53319644         |         |                         |                           | Missing | -0.01004354  | 284          |     |

|               |    |             |                |    |                         |         |              |              |     |
|---------------|----|-------------|----------------|----|-------------------------|---------|--------------|--------------|-----|
| age.yrs       | >= | 51.53319644 | AST.resultn    | =  | Missing                 | Missing | -0.00806683  | 284          |     |
| age.yrs       | >= | 51.53319644 | AST.resultn    | <  | 50                      | Missing | -0.010487406 | 284          |     |
| age.yrs       | >= | 51.53319644 | AST.resultn    | >= | 50 psc.yrs.dur          | =       | Missing      | -0.006067224 | 284 |
| age.yrs       | >= | 51.53319644 | AST.resultn    | >= | 50 psc.yrs.dur          | <       | 0.73100616   | -0.009002978 | 284 |
| age.yrs       | >= | 51.53319644 | AST.resultn    | >= | 50 psc.yrs.dur          | >=      | 0.73100616   | 0            | 284 |
| TBILL.resultn | =  | Missing     |                |    |                         |         | -0.000260226 | 285          |     |
| TBILL.resultn | <  | 2.05        | age.yrs        | =  | Missing                 |         | -0.001279783 | 285          |     |
| TBILL.resultn | <  | 2.05        | age.yrs        | <  | 55.80971937             |         | -0.001563372 | 285          |     |
| TBILL.resultn | <  | 2.05        | age.yrs        | >= | 55.80971937             |         | 0            | 285          |     |
| TBILL.resultn | >= | 2.05        | PLT.resultn    | =  | Missing                 |         | 0.000823877  | 285          |     |
| TBILL.resultn | >= | 2.05        | PLT.resultn    | <  | 234.5                   |         | 0.002966558  | 285          |     |
| TBILL.resultn | >= | 2.05        | PLT.resultn    | >= | 234.5                   |         | -0.000604578 | 285          |     |
| ALB.resultn   | =  | Missing     |                |    |                         | Missing | -0.006486992 | 286          |     |
| ALB.resultn   | <  | 3.105       |                |    |                         | Missing | -0.00310951  | 286          |     |
| ALB.resultn   | >= | 3.105       | TBILL.resultn  | =  | Missing                 | Missing | -0.006189672 | 286          |     |
| ALB.resultn   | >= | 3.105       | TBILL.resultn  | <  | 1.25                    | Missing | -0.006700218 | 286          |     |
| ALB.resultn   | >= | 3.105       | TBILL.resultn  | >= | 1.25 Hemoglobin.resultn | =       | Missing      | 0            | 286 |
| ALB.resultn   | >= | 3.105       | TBILL.resultn  | >= | 1.25 Hemoglobin.resultn | <       | 13.75        | -0.005332347 | 286 |
| ALB.resultn   | >= | 3.105       | TBILL.resultn  | >= | 1.25 Hemoglobin.resultn | >=      | 13.75        | -0.006924751 | 286 |
| TBILL.resultn | =  | Missing     |                |    |                         | Missing | -0.002270502 | 287          |     |
| TBILL.resultn | <  | 2.45        | Sodium.resultn | =  | Missing                 | Missing | -0.003166467 | 287          |     |
| TBILL.resultn | <  | 2.45        | Sodium.resultn | <  | 136.5                   | Missing | -0.001167787 | 287          |     |
| TBILL.resultn | <  | 2.45        | Sodium.resultn | >= | 136.5 age.yrs           | =       | Missing      | -0.002730979 | 287 |
| TBILL.resultn | <  | 2.45        | Sodium.resultn | >= | 136.5 age.yrs           | <       | 64.62149213  | -0.00309511  | 287 |
| TBILL.resultn | <  | 2.45        | Sodium.resultn | >= | 136.5 age.yrs           | >=      | 64.62149213  | 0            | 287 |
| TBILL.resultn | >= | 2.45        |                |    |                         | Missing | 0.000753325  | 287          |     |
| ALB.resultn   | =  | Missing     |                |    |                         |         | -0.000213735 | 288          |     |
| ALB.resultn   | <  | 3.33        | TBILL.resultn  | =  | Missing                 |         | 0.002478309  | 288          |     |
| ALB.resultn   | <  | 3.33        | TBILL.resultn  | <  | 1.35                    |         | 0.000522945  | 288          |     |
| ALB.resultn   | <  | 3.33        | TBILL.resultn  | >= | 1.35                    |         | 0.005215819  | 288          |     |
| ALB.resultn   | >= | 3.33        | TBILL.resultn  | =  | Missing                 |         | -0.000641812 | 288          |     |
| ALB.resultn   | >= | 3.33        | TBILL.resultn  | <  | 0.85                    |         | -0.00116477  | 288          |     |
| ALB.resultn   | >= | 3.33        | TBILL.resultn  | >= | 0.85                    |         | 0            | 288          |     |
| TBILL.resultn | =  | Missing     |                |    |                         |         | 0.001017838  | 289          |     |
| TBILL.resultn | <  | 1.55        | Sodium.resultn | =  | Missing                 |         | 0            | 289          |     |
| TBILL.resultn | <  | 1.55        | Sodium.resultn | <  | 138.5                   |         | 0.001831333  | 289          |     |
| TBILL.resultn | <  | 1.55        | Sodium.resultn | >= | 138.5                   |         | 0.000378331  | 289          |     |
| TBILL.resultn | >= | 1.55        | PLT.resultn    | =  | Missing                 |         | 0.003124857  | 289          |     |
| TBILL.resultn | >= | 1.55        | PLT.resultn    | <  | 212.5                   |         | 0.007295019  | 289          |     |
| TBILL.resultn | >= | 1.55        | PLT.resultn    | >= | 212.5                   |         | 0.001229329  | 289          |     |
| ALB.resultn   | =  | Missing     |                |    |                         |         | -0.001585054 | 290          |     |
| ALB.resultn   | <  | 3.33        | TBILL.resultn  | =  | Missing                 |         | 0.003302166  | 290          |     |
| ALB.resultn   | <  | 3.33        | TBILL.resultn  | <  | 1.5                     |         | -0.000640585 | 290          |     |
| ALB.resultn   | <  | 3.33        | TBILL.resultn  | >= | 1.5                     |         | 0.007639192  | 290          |     |
| ALB.resultn   | >= | 3.33        | TBILL.resultn  | =  | Missing                 |         | -0.000931319 | 290          |     |
| ALB.resultn   | >= | 3.33        | TBILL.resultn  | <  | 0.85                    |         | -0.00158872  | 290          |     |
| ALB.resultn   | >= | 3.33        | TBILL.resultn  | >= | 0.85                    |         | 0            | 290          |     |
| ALK.times.uln | =  | Missing     |                |    |                         | Missing | 0.000269316  | 291          |     |
| ALK.times.uln | <  | 5.926121601 | ALB.resultn    | =  | Missing                 | Missing | 0.000992632  | 291          |     |
| ALK.times.uln | <  | 5.926121601 | ALB.resultn    | <  | 3.295                   | Missing | 0.003049277  | 291          |     |
| ALK.times.uln | <  | 5.926121601 | ALB.resultn    | >= | 3.295 Sodium.resultn    | =       | Missing      | 0            | 291 |
| ALK.times.uln | <  | 5.926121601 | ALB.resultn    | >= | 3.295 Sodium.resultn    | <       | 137.5        | 0.002110997  | 291 |
| ALK.times.uln | <  | 5.926121601 | ALB.resultn    | >= | 3.295 Sodium.resultn    | >=      | 137.5        | -0.000296097 | 291 |
| ALK.times.uln | >= | 5.926121601 |                |    |                         | Missing | 0.004080041  | 291          |     |
| ALB.resultn   | =  | Missing     |                |    |                         | Missing | -0.00309868  | 292          |     |
| ALB.resultn   | <  | 3.225       |                |    |                         | Missing | 0.000163197  | 292          |     |
| ALB.resultn   | >= | 3.225       | TBILL.resultn  | =  | Missing                 | Missing | -0.003102207 | 292          |     |
| ALB.resultn   | >= | 3.225       | TBILL.resultn  | <  | 0.85                    | Missing | -0.003692707 | 292          |     |
| ALB.resultn   | >= | 3.225       | TBILL.resultn  | >= | 0.85 age.yrs            | =       | Missing      | -0.0022129   | 292 |
| ALB.resultn   | >= | 3.225       | TBILL.resultn  | >= | 0.85 age.yrs            | <       | 54.56947296  | -0.003222294 | 292 |
| ALB.resultn   | >= | 3.225       | TBILL.resultn  | >= | 0.85 age.yrs            | >=      | 54.56947296  | 0            | 292 |
| TBILL.resultn | =  | Missing     |                |    |                         |         | -0.005839372 | 293          |     |

|               |    |                         |    |                         |    |             |              |     |
|---------------|----|-------------------------|----|-------------------------|----|-------------|--------------|-----|
| TBILL.resultn | <  | 1.95 age.yrs            | =  | Missing                 |    |             | -0.00522668  | 293 |
| TBILL.resultn | <  | 1.95 age.yrs            | <  | 70.88295688             |    |             | -0.005489327 | 293 |
| TBILL.resultn | <  | 1.95 age.yrs            | >= | 70.88295688             |    |             | 0            | 293 |
| TBILL.resultn | >= | 1.95 Hemoglobin.resultn | =  | Missing                 |    |             | -0.002482511 | 293 |
| TBILL.resultn | >= | 1.95 Hemoglobin.resultn | <  | 12.9                    |    |             | 0.000606069  | 293 |
| TBILL.resultn | >= | 1.95 Hemoglobin.resultn | >= | 12.9                    |    |             | -0.005828472 | 293 |
| ALB.resultn   | =  | Missing                 |    |                         |    |             | -0.001743579 | 294 |
| ALB.resultn   | <  | 3.33 TBILL.resultn      | =  | Missing                 |    |             | 0.000875159  | 294 |
| ALB.resultn   | <  | 3.33 TBILL.resultn      | <  | 1.31                    |    |             | -0.001371712 | 294 |
| ALB.resultn   | <  | 3.33 TBILL.resultn      | >= | 1.31                    |    |             | 0.003530551  | 294 |
| ALB.resultn   | >= | 3.33 age.yrs            | =  | Missing                 |    |             | -0.001352044 | 294 |
| ALB.resultn   | >= | 3.33 age.yrs            | <  | 53.33470226             |    |             | -0.001796676 | 294 |
| ALB.resultn   | >= | 3.33 age.yrs            | >= | 53.33470226             |    |             | 0            | 294 |
| ALB.resultn   | =  | Missing                 |    |                         |    | Missing     | -0.006083825 | 295 |
| ALB.resultn   | <  | 2.915                   |    |                         |    | Missing     | 0.0014103    | 295 |
| ALB.resultn   | >= | 2.915 PLT.resultn       | =  | Missing                 |    | Missing     | -0.005219868 | 295 |
| ALB.resultn   | >= | 2.915 PLT.resultn       | <  | 207 TBILL.resultn       | =  | Missing     | -0.004004948 | 295 |
| ALB.resultn   | >= | 2.915 PLT.resultn       | <  | 207 TBILL.resultn       | <  | 1.25        | -0.005385965 | 295 |
| ALB.resultn   | >= | 2.915 PLT.resultn       | <  | 207 TBILL.resultn       | >= | 1.25        | 0            | 295 |
| ALB.resultn   | >= | 2.915 PLT.resultn       | >= | 207                     |    | Missing     | -0.005988591 | 295 |
| ALB.resultn   | =  | Missing                 |    |                         |    | Missing     | -0.002580833 | 296 |
| ALB.resultn   | <  | 2.915                   |    |                         |    | Missing     | 0.001463571  | 296 |
| ALB.resultn   | >= | 2.915 TBILL.resultn     | =  | Missing                 |    | Missing     | -0.002440555 | 296 |
| ALB.resultn   | >= | 2.915 TBILL.resultn     | <  | 0.75                    |    | Missing     | -0.003144358 | 296 |
| ALB.resultn   | >= | 2.915 TBILL.resultn     | >= | 0.75 age.yrs            | =  | Missing     | -0.001689381 | 296 |
| ALB.resultn   | >= | 2.915 TBILL.resultn     | >= | 0.75 age.yrs            | <  | 49.41957563 | -0.00292826  | 296 |
| ALB.resultn   | >= | 2.915 TBILL.resultn     | >= | 0.75 age.yrs            | >= | 49.41957563 | 0            | 296 |
| AST.resultn   | =  | Missing                 |    |                         |    | Missing     | -0.00916859  | 297 |
| AST.resultn   | <  | 52                      |    |                         |    | Missing     | -0.010153876 | 297 |
| AST.resultn   | >= | 52 age.yrs              | =  | Missing                 |    | Missing     | -0.008158875 | 297 |
| AST.resultn   | >= | 52 age.yrs              | <  | 52.49965777             |    | Missing     | -0.009329892 | 297 |
| AST.resultn   | >= | 52 age.yrs              | >= | 52.49965777 psc.yrs.dur | =  | Missing     | -0.004443922 | 297 |
| AST.resultn   | >= | 52 age.yrs              | >= | 52.49965777 psc.yrs.dur | <  | 0.476386037 | -0.009205268 | 297 |
| AST.resultn   | >= | 52 age.yrs              | >= | 52.49965777 psc.yrs.dur | >= | 0.476386037 | 0            | 297 |
| ALB.resultn   | =  | Missing                 |    |                         |    | Missing     | -9.81E-05    | 298 |
| ALB.resultn   | <  | 2.95                    |    |                         |    | Missing     | 0.003779634  | 298 |
| ALB.resultn   | >= | 2.95 TBILL.resultn      | =  | Missing                 |    | Missing     | 8.26E-05     | 298 |
| ALB.resultn   | >= | 2.95 TBILL.resultn      | <  | 2.05 Sodium.resultn     | =  | Missing     | 0            | 298 |
| ALB.resultn   | >= | 2.95 TBILL.resultn      | <  | 2.05 Sodium.resultn     | <  | 136.5       | 0.002130552  | 298 |
| ALB.resultn   | >= | 2.95 TBILL.resultn      | <  | 2.05 Sodium.resultn     | >= | 136.5       | -0.000396893 | 298 |
| ALB.resultn   | >= | 2.95 TBILL.resultn      | >= | 2.05                    |    | Missing     | 0.002273563  | 298 |
| TBILL.resultn | =  | Missing                 |    |                         |    |             | -0.002075302 | 299 |
| TBILL.resultn | <  | 1.55 age.yrs            | =  | Missing                 |    |             | -0.002103272 | 299 |
| TBILL.resultn | <  | 1.55 age.yrs            | <  | 63.52635181             |    |             | -0.002407213 | 299 |
| TBILL.resultn | <  | 1.55 age.yrs            | >= | 63.52635181             |    |             | 0            | 299 |
| TBILL.resultn | >= | 1.55 age.yrs            | =  | Missing                 |    |             | -0.000474387 | 299 |
| TBILL.resultn | >= | 1.55 age.yrs            | <  | 51.10746064             |    |             | -0.001625326 | 299 |
| TBILL.resultn | >= | 1.55 age.yrs            | >= | 51.10746064             |    |             | 0.002004558  | 299 |
| ALB.resultn   | =  | Missing                 |    |                         |    |             | -0.00081272  | 300 |
| ALB.resultn   | <  | 3.225 psc.yrs.dur       | =  | Missing                 |    |             | 0.00300859   | 300 |
| ALB.resultn   | <  | 3.225 psc.yrs.dur       | <  | 1.549623546             |    |             | 0.001495881  | 300 |
| ALB.resultn   | <  | 3.225 psc.yrs.dur       | >= | 1.549623546             |    |             | 0.004521298  | 300 |
| ALB.resultn   | >= | 3.225 TBILL.resultn     | =  | Missing                 |    |             | -0.000727689 | 300 |
| ALB.resultn   | >= | 3.225 TBILL.resultn     | <  | 0.85                    |    |             | -0.001207039 | 300 |
| ALB.resultn   | >= | 3.225 TBILL.resultn     | >= | 0.85                    |    |             | 0            | 300 |
| TBILL.resultn | =  | Missing                 |    |                         |    |             | 0.000358119  | 301 |
| TBILL.resultn | <  | 2.05 Sodium.resultn     | =  | Missing                 |    |             | 0            | 301 |
| TBILL.resultn | <  | 2.05 Sodium.resultn     | <  | 137.5                   |    |             | 0.002173261  | 301 |
| TBILL.resultn | <  | 2.05 Sodium.resultn     | >= | 137.5                   |    |             | -0.000139036 | 301 |
| TBILL.resultn | >= | 2.05 PLT.resultn        | =  | Missing                 |    |             | 0.002573373  | 301 |
| TBILL.resultn | >= | 2.05 PLT.resultn        | <  | 240                     |    |             | 0.005172189  | 301 |
| TBILL.resultn | >= | 2.05 PLT.resultn        | >= | 240                     |    |             | 0.000717075  | 301 |

|               |    |                         |    |                         |               |             |         |         |  |              |     |
|---------------|----|-------------------------|----|-------------------------|---------------|-------------|---------|---------|--|--------------|-----|
| TBILL.resultn | =  | Missing                 |    |                         |               |             |         |         |  | -0.000751407 | 302 |
| TBILL.resultn | <  | 2.05 ALB.resultn        | =  | Missing                 |               |             |         |         |  | 0            | 302 |
| TBILL.resultn | <  | 2.05 ALB.resultn        | <  | 3.62                    |               |             |         |         |  | 0.000153159  | 302 |
| TBILL.resultn | <  | 2.05 ALB.resultn        | >= | 3.62                    |               |             |         |         |  | -0.001707493 | 302 |
| TBILL.resultn | >= | 2.05 Hemoglobin.resultn | =  | Missing                 |               |             |         |         |  | 0.000760668  | 302 |
| TBILL.resultn | >= | 2.05 Hemoglobin.resultn | <  | 12.9                    |               |             |         |         |  | 0.003719297  | 302 |
| TBILL.resultn | >= | 2.05 Hemoglobin.resultn | >= | 12.9                    |               |             |         |         |  | -0.001928994 | 302 |
| ALB.resultn   | =  | Missing                 |    |                         |               |             |         |         |  | -0.001596022 | 303 |
| ALB.resultn   | <  | 3.225 PLT.resultn       | =  | Missing                 |               |             |         |         |  | 0.00061622   | 303 |
| ALB.resultn   | <  | 3.225 PLT.resultn       | <  | 254.5                   |               |             |         |         |  | 0.001270363  | 303 |
| ALB.resultn   | <  | 3.225 PLT.resultn       | >= | 254.5                   |               |             |         |         |  | -3.79E-05    | 303 |
| ALB.resultn   | >= | 3.225 age.yrs           | =  | Missing                 |               |             |         |         |  | -0.001280513 | 303 |
| ALB.resultn   | >= | 3.225 age.yrs           | <  | 51.70568104             |               |             |         |         |  | -0.001892522 | 303 |
| ALB.resultn   | >= | 3.225 age.yrs           | >= | 51.70568104             |               |             |         |         |  | 0            | 303 |
| TBILL.resultn | =  | Missing                 |    |                         |               |             |         |         |  | 0.001013703  | 304 |
| TBILL.resultn | <  | 2.35 Sodium.resultn     | =  | Missing                 |               |             |         |         |  | 0            | 304 |
| TBILL.resultn | <  | 2.35 Sodium.resultn     | <  | 136.5                   |               |             |         |         |  | 0.003660241  | 304 |
| TBILL.resultn | <  | 2.35 Sodium.resultn     | >= | 136.5                   |               |             |         |         |  | 0.000470913  | 304 |
| TBILL.resultn | >= | 2.35 age.yrs            | =  | Missing                 |               |             |         |         |  | 0.003266143  | 304 |
| TBILL.resultn | >= | 2.35 age.yrs            | <  | 50.84325804             |               |             |         |         |  | 0.000915046  | 304 |
| TBILL.resultn | >= | 2.35 age.yrs            | >= | 50.84325804             |               |             |         |         |  | 0.006322569  | 304 |
| ALB.resultn   | =  | Missing                 |    |                         |               |             |         | Missing |  | -0.000555288 | 305 |
| ALB.resultn   | <  | 3.15                    |    |                         |               |             |         | Missing |  | 0.003131765  | 305 |
| ALB.resultn   | >= | 3.15 TBILL.resultn      | =  | Missing                 |               |             |         | Missing |  | 0.000218867  | 305 |
| ALB.resultn   | >= | 3.15 TBILL.resultn      | <  | 0.85                    |               |             |         | Missing |  | -0.000409972 | 305 |
| ALB.resultn   | >= | 3.15 TBILL.resultn      | >= | 0.85 Sodium.resultn     | =             | Missing     |         |         |  | 0            | 305 |
| ALB.resultn   | >= | 3.15 TBILL.resultn      | >= | 0.85 Sodium.resultn     | <             | 138.5       |         |         |  | 0.003596201  | 305 |
| ALB.resultn   | >= | 3.15 TBILL.resultn      | >= | 0.85 Sodium.resultn     | >=            | 138.5       |         |         |  | 0.000197897  | 305 |
| TBILL.resultn | =  | Missing                 |    |                         |               |             |         | Missing |  | -0.002647163 | 306 |
| TBILL.resultn | <  | 1.55                    |    |                         |               |             |         | Missing |  | -0.003156447 | 306 |
| TBILL.resultn | >= | 1.55 age.yrs            | =  | Missing                 |               |             |         | Missing |  | -0.000557858 | 306 |
| TBILL.resultn | >= | 1.55 age.yrs            | <  | 54.30527036 AST.resultn | =             | Missing     |         |         |  | -0.001806615 | 306 |
| TBILL.resultn | >= | 1.55 age.yrs            | <  | 54.30527036 AST.resultn | <             | 96.5        |         |         |  | -0.003131467 | 306 |
| TBILL.resultn | >= | 1.55 age.yrs            | <  | 54.30527036 AST.resultn | >=            | 96.5        |         |         |  | 0            | 306 |
| TBILL.resultn | >= | 1.55 age.yrs            | >= | 54.30527036             |               |             |         | Missing |  | 0.002688911  | 306 |
| age.yrs       | =  | Missing                 |    |                         |               |             |         | Missing |  | -0.004922618 | 307 |
| age.yrs       | <  | 48.89390828             |    |                         |               |             |         | Missing |  | -0.005554914 | 307 |
| age.yrs       | >= | 48.89390828 AST.resultn | =  | Missing                 |               |             |         | Missing |  | -0.003846369 | 307 |
| age.yrs       | >= | 48.89390828 AST.resultn | <  | 51.5                    |               |             |         | Missing |  | -0.00576298  | 307 |
| age.yrs       | >= | 48.89390828 AST.resultn | >= | 51.5 psc.yrs.dur        | =             | Missing     |         |         |  | -0.001929758 | 307 |
| age.yrs       | >= | 48.89390828 AST.resultn | >= | 51.5 psc.yrs.dur        | <             | 0.746064339 |         |         |  | -0.004534932 | 307 |
| age.yrs       | >= | 48.89390828 AST.resultn | >= | 51.5 psc.yrs.dur        | >=            | 0.746064339 |         |         |  | 0            | 307 |
| ALB.resultn   | =  | Missing                 |    |                         |               |             |         | Missing |  | -0.003405076 | 308 |
| ALB.resultn   | <  | 2.915                   |    |                         |               |             |         | Missing |  | -0.000372981 | 308 |
| ALB.resultn   | >= | 2.915 ALK.times.uln     | =  | Missing                 | TBILL.resultn | =           | Missing |         |  | -0.00300694  | 308 |
| ALB.resultn   | >= | 2.915 ALK.times.uln     | =  | Missing                 | TBILL.resultn | <           | 0.95    |         |  | -0.00435215  | 308 |
| ALB.resultn   | >= | 2.915 ALK.times.uln     | =  | Missing                 | TBILL.resultn | >=          | 0.95    |         |  | 0            | 308 |
| ALB.resultn   | >= | 2.915 ALK.times.uln     | <  | 5.462893197             |               |             |         | Missing |  | -0.004135727 | 308 |
| ALB.resultn   | >= | 2.915 ALK.times.uln     | >= | 5.462893197             |               |             |         | Missing |  | -0.001652225 | 308 |
| ALB.resultn   | =  | Missing                 |    |                         |               |             |         | Missing |  | -0.000176419 | 309 |
| ALB.resultn   | <  | 2.875                   |    |                         |               |             |         | Missing |  | 0.003262066  | 309 |
| ALB.resultn   | >= | 2.875 PLT.resultn       | =  | Missing                 |               |             |         | Missing |  | 0.00071347   | 309 |
| ALB.resultn   | >= | 2.875 PLT.resultn       | <  | 197.5 ALB.resultn       | =             | Missing     |         |         |  | 0.001357005  | 309 |
| ALB.resultn   | >= | 2.875 PLT.resultn       | <  | 197.5 ALB.resultn       | <             | 3.9         |         |         |  | 0.003799613  | 309 |
| ALB.resultn   | >= | 2.875 PLT.resultn       | <  | 197.5 ALB.resultn       | >=            | 3.9         |         |         |  | 0            | 309 |
| ALB.resultn   | >= | 2.875 PLT.resultn       | >= | 197.5                   |               |             |         | Missing |  | -0.000664862 | 309 |
| ALB.resultn   | =  | Missing                 |    |                         |               |             |         | Missing |  | -0.004936243 | 310 |
| ALB.resultn   | <  | 2.875                   |    |                         |               |             |         | Missing |  | -0.000402896 | 310 |
| ALB.resultn   | >= | 2.875 PLT.resultn       | =  | Missing                 |               |             |         | Missing |  | -0.003211742 | 310 |
| ALB.resultn   | >= | 2.875 PLT.resultn       | <  | 198.5 TBILL.resultn     | =             | Missing     |         |         |  | -0.002361556 | 310 |
| ALB.resultn   | >= | 2.875 PLT.resultn       | <  | 198.5 TBILL.resultn     | <             | 1.15        |         |         |  | -0.003837528 | 310 |
| ALB.resultn   | >= | 2.875 PLT.resultn       | <  | 198.5 TBILL.resultn     | >=            | 1.15        |         |         |  | 0            | 310 |

|                |    |             |                    |    |             |                              |              |     |
|----------------|----|-------------|--------------------|----|-------------|------------------------------|--------------|-----|
| ALB.resultn    | >= | 2.875       | PLT.resultn        | >= | 198.5       | Missing                      | -0.004588539 | 310 |
| TBILL.resultn  | =  | Missing     |                    |    |             |                              | 0.000751756  | 311 |
| TBILL.resultn  | <  | 2.35        | ALB.resultn        | =  | Missing     |                              | 0            | 311 |
| TBILL.resultn  | <  | 2.35        | ALB.resultn        | <  | 3.105       |                              | 0.004290607  | 311 |
| TBILL.resultn  | <  | 2.35        | ALB.resultn        | >= | 3.105       |                              | 0.000462209  | 311 |
| TBILL.resultn  | >= | 2.35        | PLT.resultn        | =  | Missing     |                              | 0.003267232  | 311 |
| TBILL.resultn  | >= | 2.35        | PLT.resultn        | <  | 249.5       |                              | 0.005997431  | 311 |
| TBILL.resultn  | >= | 2.35        | PLT.resultn        | >= | 249.5       |                              | 0.000747048  | 311 |
| ALK.times.uln  | =  | Missing     | PLT.resultn        | =  | Missing     |                              | -0.001678221 | 312 |
| ALK.times.uln  | =  | Missing     | PLT.resultn        | <  | 204.5       |                              | 0.003102563  | 312 |
| ALK.times.uln  | =  | Missing     | PLT.resultn        | >= | 204.5       |                              | -0.001349694 | 312 |
| ALK.times.uln  | <  | 5.92438247  | psc.yrs.dur        | =  | Missing     |                              | -0.001152074 | 312 |
| ALK.times.uln  | <  | 5.92438247  | psc.yrs.dur        | <  | 2.05065024  |                              | -0.001572673 | 312 |
| ALK.times.uln  | <  | 5.92438247  | psc.yrs.dur        | >= | 2.05065024  |                              | 0            | 312 |
| ALK.times.uln  | >= | 5.92438247  |                    |    |             |                              | 0.001514868  | 312 |
| TBILL.resultn  | =  | Missing     |                    |    |             |                              | -0.002698835 | 313 |
| TBILL.resultn  | <  | 1.65        | age.yrs            | =  | Missing     |                              | -0.003529112 | 313 |
| TBILL.resultn  | <  | 1.65        | age.yrs            | <  | 68.47501711 |                              | -0.003710092 | 313 |
| TBILL.resultn  | <  | 1.65        | age.yrs            | >= | 68.47501711 |                              | 0            | 313 |
| TBILL.resultn  | >= | 1.65        | PLT.resultn        | =  | Missing     |                              | -0.001577946 | 313 |
| TBILL.resultn  | >= | 1.65        | PLT.resultn        | <  | 211         |                              | 0.001397175  | 313 |
| TBILL.resultn  | >= | 1.65        | PLT.resultn        | >= | 211         |                              | -0.002817579 | 313 |
| ALB.resultn    | =  | Missing     |                    |    |             | Missing                      | -0.002258339 | 314 |
| ALB.resultn    | <  | 3.645       | PLT.resultn        | =  | Missing     | Missing                      | -0.000789898 | 314 |
| ALB.resultn    | <  | 3.645       | PLT.resultn        | <  | 220.5       | Missing                      | 0.006074366  | 314 |
| ALB.resultn    | <  | 3.645       | PLT.resultn        | >= | 220.5       | ALK.times.uln = Missing      | -0.00228213  | 314 |
| ALB.resultn    | <  | 3.645       | PLT.resultn        | >= | 220.5       | ALK.times.uln < 5.728910445  | -0.00333542  | 314 |
| ALB.resultn    | <  | 3.645       | PLT.resultn        | >= | 220.5       | ALK.times.uln >= 5.728910445 | 0            | 314 |
| ALB.resultn    | >= | 3.645       |                    |    |             | Missing                      | -0.002907849 | 314 |
| TBILL.resultn  | =  | Missing     |                    |    |             |                              | -0.003580758 | 315 |
| TBILL.resultn  | <  | 2.05        | age.yrs            | =  | Missing     |                              | -0.004822516 | 315 |
| TBILL.resultn  | <  | 2.05        | age.yrs            | <  | 69.84257358 |                              | -0.005067314 | 315 |
| TBILL.resultn  | <  | 2.05        | age.yrs            | >= | 69.84257358 |                              | 0            | 315 |
| TBILL.resultn  | >= | 2.05        | psc.yrs.dur        | =  | Missing     |                              | -0.002652255 | 315 |
| TBILL.resultn  | >= | 2.05        | psc.yrs.dur        | <  | 2.600958248 |                              | -0.004380384 | 315 |
| TBILL.resultn  | >= | 2.05        | psc.yrs.dur        | >= | 2.600958248 |                              | -6.01E-05    | 315 |
| Sodium.resultn | =  | Missing     |                    |    |             | Missing                      | -0.003480999 | 316 |
| Sodium.resultn | <  | 136.5       |                    |    |             | Missing                      | 5.01E-05     | 316 |
| Sodium.resultn | >= | 136.5       | age.yrs            | =  | Missing     | Missing                      | -0.003367671 | 316 |
| Sodium.resultn | >= | 136.5       | age.yrs            | <  | 52.05065024 | Missing                      | -0.004016548 | 316 |
| Sodium.resultn | >= | 136.5       | age.yrs            | >= | 52.05065024 | AST.resultn = Missing        | -0.002082896 | 316 |
| Sodium.resultn | >= | 136.5       | age.yrs            | >= | 52.05065024 | AST.resultn < 51.5           | -0.004165792 | 316 |
| Sodium.resultn | >= | 136.5       | age.yrs            | >= | 52.05065024 | AST.resultn >= 51.5          | 0            | 316 |
| psc.yrs.dur    | =  | Missing     |                    |    |             | Missing                      | 0.000123309  | 317 |
| psc.yrs.dur    | <  | 1.835728953 |                    |    |             | Missing                      | -0.000376119 | 317 |
| psc.yrs.dur    | >= | 1.835728953 | TBILL.resultn      | =  | Missing     | Missing                      | 0.001065414  | 317 |
| psc.yrs.dur    | >= | 1.835728953 | TBILL.resultn      | <  | 2.5         | Sodium.resultn = Missing     | 0            | 317 |
| psc.yrs.dur    | >= | 1.835728953 | TBILL.resultn      | <  | 2.5         | Sodium.resultn < 137.5       | 0.003657667  | 317 |
| psc.yrs.dur    | >= | 1.835728953 | TBILL.resultn      | <  | 2.5         | Sodium.resultn >= 137.5      | 0.000261714  | 317 |
| psc.yrs.dur    | >= | 1.835728953 | TBILL.resultn      | >= | 2.5         | Missing                      | 0.003835254  | 317 |
| TBILL.resultn  | =  | Missing     |                    |    |             |                              | 0.001181662  | 318 |
| TBILL.resultn  | <  | 2.05        | Sodium.resultn     | =  | Missing     |                              | 0            | 318 |
| TBILL.resultn  | <  | 2.05        | Sodium.resultn     | <  | 136.5       |                              | 0.003300586  | 318 |
| TBILL.resultn  | <  | 2.05        | Sodium.resultn     | >= | 136.5       |                              | 0.000536128  | 318 |
| TBILL.resultn  | >= | 2.05        | Hemoglobin.resultn | =  | Missing     |                              | 0.001960738  | 318 |
| TBILL.resultn  | >= | 2.05        | Hemoglobin.resultn | <  | 13.15       |                              | 0.003914927  | 318 |
| TBILL.resultn  | >= | 2.05        | Hemoglobin.resultn | >= | 13.15       |                              | 6.55E-06     | 318 |
| TBILL.resultn  | =  | Missing     |                    |    |             |                              | -0.000553943 | 319 |
| TBILL.resultn  | <  | 1.65        | ALK.times.uln      | =  | Missing     |                              | 0            | 319 |
| TBILL.resultn  | <  | 1.65        | ALK.times.uln      | <  | 5.963877551 |                              | -0.000422544 | 319 |
| TBILL.resultn  | <  | 1.65        | ALK.times.uln      | >= | 5.963877551 |                              | 0.003134707  | 319 |
| TBILL.resultn  | >= | 1.65        | PLT.resultn        | =  | Missing     |                              | 0.002100213  | 319 |

|                |    |             |                |    |             |             |              |             |              |     |
|----------------|----|-------------|----------------|----|-------------|-------------|--------------|-------------|--------------|-----|
| TBILL.resultn  | >= | 1.65        | PLT.resultn    | <  | 220         |             | 0.005489866  | 319         |              |     |
| TBILL.resultn  | >= | 1.65        | PLT.resultn    | >= | 220         |             | 0.000405387  | 319         |              |     |
| Sodium.resultn | =  | Missing     | TBILL.resultn  | =  | Missing     |             | -0.001502241 | 320         |              |     |
| Sodium.resultn | =  | Missing     | TBILL.resultn  | <  | 1.25        |             | -0.00182415  | 320         |              |     |
| Sodium.resultn | =  | Missing     | TBILL.resultn  | >= | 1.25        |             | 0            | 320         |              |     |
| Sodium.resultn | <  | 136.5       |                |    |             |             | 0.002223754  | 320         |              |     |
| Sodium.resultn | >= | 136.5       | TBILL.resultn  | =  | Missing     |             | -0.000967113 | 320         |              |     |
| Sodium.resultn | >= | 136.5       | TBILL.resultn  | <  | 2.4         |             | -0.001114286 | 320         |              |     |
| Sodium.resultn | >= | 136.5       | TBILL.resultn  | >= | 2.4         |             | 0.000812332  | 320         |              |     |
| TBILL.resultn  | =  | Missing     |                |    |             |             | 0.000559111  | 321         |              |     |
| TBILL.resultn  | <  | 1.95        | Sodium.resultn | =  | Missing     |             | 0            | 321         |              |     |
| TBILL.resultn  | <  | 1.95        | Sodium.resultn | <  | 136.5       |             | 0.00311981   | 321         |              |     |
| TBILL.resultn  | <  | 1.95        | Sodium.resultn | >= | 136.5       |             | 0.000445921  | 321         |              |     |
| TBILL.resultn  | >= | 1.95        | PLT.resultn    | =  | Missing     |             | 0.003097184  | 321         |              |     |
| TBILL.resultn  | >= | 1.95        | PLT.resultn    | <  | 220.5       |             | 0.005947384  | 321         |              |     |
| TBILL.resultn  | >= | 1.95        | PLT.resultn    | >= | 220.5       |             | 0.000857742  | 321         |              |     |
| ALB.resultn    | =  | Missing     |                |    |             | Missing     | -0.004426715 | 322         |              |     |
| ALB.resultn    | <  | 2.95        |                |    |             | Missing     | -0.000446878 | 322         |              |     |
| ALB.resultn    | >= | 2.95        | psc.yrs.dur    | =  | Missing     | Missing     | -0.004236213 | 322         |              |     |
| ALB.resultn    | >= | 2.95        | psc.yrs.dur    | <  | 6.246406571 | Missing     | -0.004553628 | 322         |              |     |
| ALB.resultn    | >= | 2.95        | psc.yrs.dur    | >= | 6.246406571 | AST.resultn | =            | Missing     | -0.002331721 | 322 |
| ALB.resultn    | >= | 2.95        | psc.yrs.dur    | >= | 6.246406571 | AST.resultn | <            | 47.5        | -0.004974339 | 322 |
| ALB.resultn    | >= | 2.95        | psc.yrs.dur    | >= | 6.246406571 | AST.resultn | >=           | 47.5        | 0            | 322 |
| ALB.resultn    | =  | Missing     |                |    |             | Missing     | -0.004582867 | 323         |              |     |
| ALB.resultn    | <  | 3.245       |                |    |             | Missing     | -0.000821705 | 323         |              |     |
| ALB.resultn    | >= | 3.245       | TBILL.resultn  | =  | Missing     | Missing     | -0.003936889 | 323         |              |     |
| ALB.resultn    | >= | 3.245       | TBILL.resultn  | <  | 0.75        | Missing     | -0.004593372 | 323         |              |     |
| ALB.resultn    | >= | 3.245       | TBILL.resultn  | >= | 0.75        | psc.yrs.dur | =            | Missing     | -0.003220725 | 323 |
| ALB.resultn    | >= | 3.245       | TBILL.resultn  | >= | 0.75        | psc.yrs.dur | <            | 6.410677618 | -0.003795854 | 323 |
| ALB.resultn    | >= | 3.245       | TBILL.resultn  | >= | 0.75        | psc.yrs.dur | >=           | 6.410677618 | 0            | 323 |
| TBILL.resultn  | =  | Missing     |                |    |             | Missing     | 0.000676332  | 324         |              |     |
| TBILL.resultn  | <  | 2.85        | Sodium.resultn | =  | Missing     | Missing     | -0.000451419 | 324         |              |     |
| TBILL.resultn  | <  | 2.85        | Sodium.resultn | <  | 136.5       | Missing     | 0.002710631  | 324         |              |     |
| TBILL.resultn  | <  | 2.85        | Sodium.resultn | >= | 136.5       | ALB.resultn | =            | Missing     | 0.00011827   | 324 |
| TBILL.resultn  | <  | 2.85        | Sodium.resultn | >= | 136.5       | ALB.resultn | <            | 3.645       | 0.000511232  | 324 |
| TBILL.resultn  | <  | 2.85        | Sodium.resultn | >= | 136.5       | ALB.resultn | >=           | 3.645       | 0            | 324 |
| TBILL.resultn  | >= | 2.85        |                |    |             | Missing     | 0.003991522  | 324         |              |     |
| ALB.resultn    | =  | Missing     |                |    |             |             | -0.004089409 | 325         |              |     |
| ALB.resultn    | <  | 3.225       | TBILL.resultn  | =  | Missing     |             | -0.001503655 | 325         |              |     |
| ALB.resultn    | <  | 3.225       | TBILL.resultn  | <  | 1.2         |             | -0.003157676 | 325         |              |     |
| ALB.resultn    | <  | 3.225       | TBILL.resultn  | >= | 1.2         |             | 0            | 325         |              |     |
| ALB.resultn    | >= | 3.225       | ALK.times.uln  | =  | Missing     |             | -0.004067375 | 325         |              |     |
| ALB.resultn    | >= | 3.225       | ALK.times.uln  | <  | 5.462893197 |             | -0.004392009 | 325         |              |     |
| ALB.resultn    | >= | 3.225       | ALK.times.uln  | >= | 5.462893197 |             | -0.001559798 | 325         |              |     |
| ALB.resultn    | =  | Missing     |                |    |             | Missing     | -0.002562267 | 326         |              |     |
| ALB.resultn    | <  | 2.95        |                |    |             | Missing     | 0.001054879  | 326         |              |     |
| ALB.resultn    | >= | 2.95        | TBILL.resultn  | =  | Missing     | Missing     | -0.002561708 | 326         |              |     |
| ALB.resultn    | >= | 2.95        | TBILL.resultn  | <  | 0.95        | Missing     | -0.003067444 | 326         |              |     |
| ALB.resultn    | >= | 2.95        | TBILL.resultn  | >= | 0.95        | age.yrs     | =            | Missing     | -0.001591242 | 326 |
| ALB.resultn    | >= | 2.95        | TBILL.resultn  | >= | 0.95        | age.yrs     | <            | 51.51813826 | -0.002453165 | 326 |
| ALB.resultn    | >= | 2.95        | TBILL.resultn  | >= | 0.95        | age.yrs     | >=           | 51.51813826 | 0            | 326 |
| ALB.resultn    | =  | Missing     |                |    |             |             | -0.004083569 | 327         |              |     |
| ALB.resultn    | <  | 3.225       | TBILL.resultn  | =  | Missing     |             | -0.000800449 | 327         |              |     |
| ALB.resultn    | <  | 3.225       | TBILL.resultn  | <  | 1.6         |             | -0.001680943 | 327         |              |     |
| ALB.resultn    | <  | 3.225       | TBILL.resultn  | >= | 1.6         |             | 0            | 327         |              |     |
| ALB.resultn    | >= | 3.225       | ALK.times.uln  | =  | Missing     |             | -0.003758742 | 327         |              |     |
| ALB.resultn    | >= | 3.225       | ALK.times.uln  | <  | 5.438574341 |             | -0.004252836 | 327         |              |     |
| ALB.resultn    | >= | 3.225       | ALK.times.uln  | >= | 5.438574341 |             | -0.000870538 | 327         |              |     |
| ALK.times.uln  | =  | Missing     | ALB.resultn    | =  | Missing     |             | -0.000887851 | 328         |              |     |
| ALK.times.uln  | =  | Missing     | ALB.resultn    | <  | 3.95        |             | 0.003460651  | 328         |              |     |
| ALK.times.uln  | =  | Missing     | ALB.resultn    | >= | 3.95        |             | -0.000865544 | 328         |              |     |
| ALK.times.uln  | <  | 5.462893197 |                |    |             |             | -0.000372398 | 328         |              |     |

|               |    |             |                    |    |             |             |         |              |              |     |
|---------------|----|-------------|--------------------|----|-------------|-------------|---------|--------------|--------------|-----|
| ALK.times.uln | >= | 5.462893197 | PLT.resultn        | =  | Missing     |             |         | 0.002807225  | 328          |     |
| ALK.times.uln | >= | 5.462893197 | PLT.resultn        | <  | 299         |             |         | 0.00561445   | 328          |     |
| ALK.times.uln | >= | 5.462893197 | PLT.resultn        | >= | 299         |             |         | 0            | 328          |     |
| TBILL.resultn | =  | Missing     |                    |    |             |             |         | 6.90E-05     | 329          |     |
| TBILL.resultn | <  | 1.9         | psc.yrs.dur        | =  | Missing     |             |         | -0.001867893 | 329          |     |
| TBILL.resultn | <  | 1.9         | psc.yrs.dur        | <  | 6.258726899 |             |         | -0.002124472 | 329          |     |
| TBILL.resultn | <  | 1.9         | psc.yrs.dur        | >= | 6.258726899 |             |         | 0            | 329          |     |
| TBILL.resultn | >= | 1.9         | ALB.resultn        | =  | Missing     |             |         | 0.000672132  | 329          |     |
| TBILL.resultn | >= | 1.9         | ALB.resultn        | <  | 3.35        |             |         | 0.003722712  | 329          |     |
| TBILL.resultn | >= | 1.9         | ALB.resultn        | >= | 3.35        |             |         | -0.000933436 | 329          |     |
| psc.yrs.dur   | =  | Missing     |                    |    |             |             | Missing | -0.003410294 | 330          |     |
| psc.yrs.dur   | <  | 1.994524298 |                    |    |             |             | Missing | -0.003973386 | 330          |     |
| psc.yrs.dur   | >= | 1.994524298 | TBILL.resultn      | =  | Missing     |             | Missing | -0.002207641 | 330          |     |
| psc.yrs.dur   | >= | 1.994524298 | TBILL.resultn      | <  | 2.5         | age.yrs     | =       | Missing      | -0.002727628 | 330 |
| psc.yrs.dur   | >= | 1.994524298 | TBILL.resultn      | <  | 2.5         | age.yrs     | <       | 55.44147844  | -0.003636837 | 330 |
| psc.yrs.dur   | >= | 1.994524298 | TBILL.resultn      | <  | 2.5         | age.yrs     | >=      | 55.44147844  | 0            | 330 |
| psc.yrs.dur   | >= | 1.994524298 | TBILL.resultn      | >= | 2.5         |             |         | Missing      | 0.001006821  | 330 |
| TBILL.resultn | =  | Missing     |                    |    |             |             | Missing | -0.004326387 | 331          |     |
| TBILL.resultn | <  | 0.95        |                    |    |             |             | Missing | -0.004081136 | 331          |     |
| TBILL.resultn | >= | 0.95        | Hemoglobin.resultn | =  | Missing     |             | Missing | 0.00106428   | 331          |     |
| TBILL.resultn | >= | 0.95        | Hemoglobin.resultn | <  | 13.55       | AST.resultn | =       | Missing      | -0.002329984 | 331 |
| TBILL.resultn | >= | 0.95        | Hemoglobin.resultn | <  | 13.55       | AST.resultn | <       | 88           | -0.004349304 | 331 |
| TBILL.resultn | >= | 0.95        | Hemoglobin.resultn | <  | 13.55       | AST.resultn | >=      | 88           | 0            | 331 |
| TBILL.resultn | >= | 0.95        | Hemoglobin.resultn | >= | 13.55       |             | Missing | -0.003909796 | 331          |     |
| TBILL.resultn | =  | Missing     |                    |    |             |             |         | -0.00134878  | 332          |     |
| TBILL.resultn | <  | 2.35        | psc.yrs.dur        | =  | Missing     |             |         | -0.000861205 | 332          |     |
| TBILL.resultn | <  | 2.35        | psc.yrs.dur        | <  | 1.961670089 |             |         | -0.001283019 | 332          |     |
| TBILL.resultn | <  | 2.35        | psc.yrs.dur        | >= | 1.961670089 |             |         | 0            | 332          |     |
| TBILL.resultn | >= | 2.35        | PLT.resultn        | =  | Missing     |             |         | 0.002210065  | 332          |     |
| TBILL.resultn | >= | 2.35        | PLT.resultn        | <  | 234.5       |             |         | 0.004653616  | 332          |     |
| TBILL.resultn | >= | 2.35        | PLT.resultn        | >= | 234.5       |             |         | 0.000173772  | 332          |     |
| ALB.resultn   | =  | Missing     |                    |    |             |             | Missing | -0.005078905 | 333          |     |
| ALB.resultn   | <  | 2.915       |                    |    |             |             | Missing | -0.001332503 | 333          |     |
| ALB.resultn   | >= | 2.915       | psc.yrs.dur        | =  | Missing     |             | Missing | -0.005445353 | 333          |     |
| ALB.resultn   | >= | 2.915       | psc.yrs.dur        | <  | 6.410677618 |             | Missing | -0.005789374 | 333          |     |
| ALB.resultn   | >= | 2.915       | psc.yrs.dur        | >= | 6.410677618 | AST.resultn | =       | Missing      | -0.003392327 | 333 |
| ALB.resultn   | >= | 2.915       | psc.yrs.dur        | >= | 6.410677618 | AST.resultn | <       | 60.5         | -0.006186007 | 333 |
| ALB.resultn   | >= | 2.915       | psc.yrs.dur        | >= | 6.410677618 | AST.resultn | >=      | 60.5         | 0            | 333 |
| psc.yrs.dur   | =  | Missing     |                    |    |             |             |         | -0.000180245 | 334          |     |
| psc.yrs.dur   | <  | 7.404517454 | PLT.resultn        | =  | Missing     |             |         | 0            | 334          |     |
| psc.yrs.dur   | <  | 7.404517454 | PLT.resultn        | <  | 287.5       |             |         | -9.23E-05    | 334          |     |
| psc.yrs.dur   | <  | 7.404517454 | PLT.resultn        | >= | 287.5       |             |         | -0.001182006 | 334          |     |
| psc.yrs.dur   | >= | 7.404517454 | AST.resultn        | =  | Missing     |             |         | 0.0018861    | 334          |     |
| psc.yrs.dur   | >= | 7.404517454 | AST.resultn        | <  | 43          |             |         | -0.001145069 | 334          |     |
| psc.yrs.dur   | >= | 7.404517454 | AST.resultn        | >= | 43          |             |         | 0.003906879  | 334          |     |
| age.yrs       | =  | Missing     |                    |    |             |             | Missing | -0.001732096 | 335          |     |
| age.yrs       | <  | 51.58521561 |                    |    |             |             | Missing | -0.002244086 | 335          |     |
| age.yrs       | >= | 51.58521561 | TBILL.resultn      | =  | Missing     |             | Missing | -0.000695927 | 335          |     |
| age.yrs       | >= | 51.58521561 | TBILL.resultn      | <  | 1.31        | AST.resultn | =       | Missing      | -0.001656435 | 335 |
| age.yrs       | >= | 51.58521561 | TBILL.resultn      | <  | 1.31        | AST.resultn | <       | 56.5         | -0.002602969 | 335 |
| age.yrs       | >= | 51.58521561 | TBILL.resultn      | <  | 1.31        | AST.resultn | >=      | 56.5         | 0            | 335 |
| age.yrs       | >= | 51.58521561 | TBILL.resultn      | >= | 1.31        |             | Missing | 0.004254381  | 335          |     |
| ALB.resultn   | =  | Missing     |                    |    |             |             |         | -0.000169878 | 336          |     |
| ALB.resultn   | <  | 3.31        | TBILL.resultn      | =  | Missing     |             |         | 0.002963722  | 336          |     |
| ALB.resultn   | <  | 3.31        | TBILL.resultn      | <  | 2.45        |             |         | 0.001725864  | 336          |     |
| ALB.resultn   | <  | 3.31        | TBILL.resultn      | >= | 2.45        |             |         | 0.005326906  | 336          |     |
| ALB.resultn   | >= | 3.31        | Sodium.resultn     | =  | Missing     |             |         | 0            | 336          |     |
| ALB.resultn   | >= | 3.31        | Sodium.resultn     | <  | 136.5       |             |         | 0.00211956   | 336          |     |
| ALB.resultn   | >= | 3.31        | Sodium.resultn     | >= | 136.5       |             |         | 0.000386765  | 336          |     |
| ALB.resultn   | =  | Missing     |                    |    |             |             |         | -2.62E-05    | 337          |     |
| ALB.resultn   | <  | 3.31        | TBILL.resultn      | =  | Missing     |             |         | 0.002051156  | 337          |     |
| ALB.resultn   | <  | 3.31        | TBILL.resultn      | <  | 1.31        |             |         | 0.000597486  | 337          |     |

|               |    |             |               |    |             |               |              |              |              |     |
|---------------|----|-------------|---------------|----|-------------|---------------|--------------|--------------|--------------|-----|
| ALB.resultn   | <  | 3.31        | TBILL.resultn | >= | 1.31        |               | 0.003214092  | 337          |              |     |
| ALB.resultn   | >= | 3.31        | TBILL.resultn | =  | Missing     |               | -0.00036179  | 337          |              |     |
| ALB.resultn   | >= | 3.31        | TBILL.resultn | <  | 0.75        |               | -0.000884376 | 337          |              |     |
| ALB.resultn   | >= | 3.31        | TBILL.resultn | >= | 0.75        |               | 0            | 337          |              |     |
| AST.resultn   | =  | Missing     |               |    |             | Missing       | -4.83E-05    | 338          |              |     |
| AST.resultn   | <  | 44          |               |    |             | Missing       | -0.001005751 | 338          |              |     |
| AST.resultn   | >= | 44          | age.yrs       | =  | Missing     | Missing       | 0.000558119  | 338          |              |     |
| AST.resultn   | >= | 44          | age.yrs       | <  | 51.58521561 | Missing       | -0.000172294 | 338          |              |     |
| AST.resultn   | >= | 44          | age.yrs       | >= | 51.58521561 | PLT.resultn   | =            | Missing      | 0.002499946  | 338 |
| AST.resultn   | >= | 44          | age.yrs       | >= | 51.58521561 | PLT.resultn   | <            | 251.5        | 0.004204455  | 338 |
| AST.resultn   | >= | 44          | age.yrs       | >= | 51.58521561 | PLT.resultn   | >=           | 251.5        | 0            | 338 |
| ALB.resultn   | =  | Missing     |               |    |             |               | -0.00082602  | 339          |              |     |
| ALB.resultn   | <  | 3.33        | TBILL.resultn | =  | Missing     |               | 0.001320107  | 339          |              |     |
| ALB.resultn   | <  | 3.33        | TBILL.resultn | <  | 2.45        |               | 0.00058199   | 339          |              |     |
| ALB.resultn   | <  | 3.33        | TBILL.resultn | >= | 2.45        |               | 0.002304262  | 339          |              |     |
| ALB.resultn   | >= | 3.33        | AST.resultn   | =  | Missing     |               | -0.000579385 | 339          |              |     |
| ALB.resultn   | >= | 3.33        | AST.resultn   | <  | 51.5        |               | -0.001195362 | 339          |              |     |
| ALB.resultn   | >= | 3.33        | AST.resultn   | >= | 51.5        |               | 0            | 339          |              |     |
| ALK.times.uln | =  | Missing     | TBILL.resultn | =  | Missing     |               | -0.001729877 | 340          |              |     |
| ALK.times.uln | =  | Missing     | TBILL.resultn | <  | 1.55        |               | -0.001428589 | 340          |              |     |
| ALK.times.uln | =  | Missing     | TBILL.resultn | >= | 1.55        |               | 0.002182467  | 340          |              |     |
| ALK.times.uln | <  | 5.965616681 | ALB.resultn   | =  | Missing     |               | 0            | 340          |              |     |
| ALK.times.uln | <  | 5.965616681 | ALB.resultn   | <  | 4.15        |               | -0.001553888 | 340          |              |     |
| ALK.times.uln | <  | 5.965616681 | ALB.resultn   | >= | 4.15        |               | -0.000983997 | 340          |              |     |
| ALK.times.uln | >= | 5.965616681 |               |    |             |               | 0.001500124  | 340          |              |     |
| ALB.resultn   | =  | Missing     |               |    |             |               | -0.002234455 | 341          |              |     |
| ALB.resultn   | <  | 3.245       | TBILL.resultn | =  | Missing     |               | 6.88E-05     | 341          |              |     |
| ALB.resultn   | <  | 3.245       | TBILL.resultn | <  | 1.31        |               | -0.001828127 | 341          |              |     |
| ALB.resultn   | <  | 3.245       | TBILL.resultn | >= | 1.31        |               | 0.002138117  | 341          |              |     |
| ALB.resultn   | >= | 3.245       | psc.yrs.dur   | =  | Missing     |               | -0.002217527 | 341          |              |     |
| ALB.resultn   | >= | 3.245       | psc.yrs.dur   | <  | 7.404517454 |               | -0.002458562 | 341          |              |     |
| ALB.resultn   | >= | 3.245       | psc.yrs.dur   | >= | 7.404517454 |               | 0            | 341          |              |     |
| ALB.resultn   | =  | Missing     |               |    |             | Missing       | -0.002404621 | 342          |              |     |
| ALB.resultn   | <  | 2.825       |               |    |             | Missing       | 0.001221744  | 342          |              |     |
| ALB.resultn   | >= | 2.825       | age.yrs       | =  | Missing     | Missing       | -0.002496472 | 342          |              |     |
| ALB.resultn   | >= | 2.825       | age.yrs       | <  | 54.91991786 | Missing       | -0.002978846 | 342          |              |     |
| ALB.resultn   | >= | 2.825       | age.yrs       | >= | 54.91991786 | TBILL.resultn | =            | Missing      | -0.001266418 | 342 |
| ALB.resultn   | >= | 2.825       | age.yrs       | >= | 54.91991786 | TBILL.resultn | <            | 0.75         | -0.003248636 | 342 |
| ALB.resultn   | >= | 2.825       | age.yrs       | >= | 54.91991786 | TBILL.resultn | >=           | 0.75         | 0            | 342 |
| ALB.resultn   | =  | Missing     |               |    |             |               | -0.001110137 | 343          |              |     |
| ALB.resultn   | <  | 3.33        | TBILL.resultn | =  | Missing     |               | 0.003026934  | 343          |              |     |
| ALB.resultn   | <  | 3.33        | TBILL.resultn | <  | 1.31        |               | 4.87E-05     | 343          |              |     |
| ALB.resultn   | <  | 3.33        | TBILL.resultn | >= | 1.31        |               | 0.005757005  | 343          |              |     |
| ALB.resultn   | >= | 3.33        | TBILL.resultn | =  | Missing     |               | -0.000634615 | 343          |              |     |
| ALB.resultn   | >= | 3.33        | TBILL.resultn | <  | 0.85        |               | -0.001104909 | 343          |              |     |
| ALB.resultn   | >= | 3.33        | TBILL.resultn | >= | 0.85        |               | 0            | 343          |              |     |
| TBILL.resultn | =  | Missing     |               |    |             |               | 0.00111038   | 344          |              |     |
| TBILL.resultn | <  | 2.5         | ALK.times.uln | =  | Missing     |               | 0            | 344          |              |     |
| TBILL.resultn | <  | 2.5         | ALK.times.uln | <  | 5.667726923 |               | 0.000189199  | 344          |              |     |
| TBILL.resultn | <  | 2.5         | ALK.times.uln | >= | 5.667726923 |               | 0.002401364  | 344          |              |     |
| TBILL.resultn | >= | 2.5         | AST.resultn   | =  | Missing     |               | 0.002859431  | 344          |              |     |
| TBILL.resultn | >= | 2.5         | AST.resultn   | <  | 103.5       |               | 0.000748677  | 344          |              |     |
| TBILL.resultn | >= | 2.5         | AST.resultn   | >= | 103.5       |               | 0.004970186  | 344          |              |     |
| ALK.times.uln | =  | Missing     | ALB.resultn   | =  | Missing     | Missing       | -0.005901624 | 345          |              |     |
| ALK.times.uln | =  | Missing     | ALB.resultn   | <  | 3.95        | age.yrs       | =            | Missing      | -0.002465037 | 345 |
| ALK.times.uln | =  | Missing     | ALB.resultn   | <  | 3.95        | age.yrs       | <            | 53.32648871  | -0.004705979 | 345 |
| ALK.times.uln | =  | Missing     | ALB.resultn   | <  | 3.95        | age.yrs       | >=           | 53.32648871  | 0            | 345 |
| ALK.times.uln | =  | Missing     | ALB.resultn   | >= | 3.95        |               | Missing      | -0.005480448 | 345          |     |
| ALK.times.uln | <  | 5.963877551 |               |    |             | Missing       | -0.005484519 | 345          |              |     |
| ALK.times.uln | >= | 5.963877551 |               |    |             | Missing       | -0.002757682 | 345          |              |     |
| psc.yrs.dur   | =  | Missing     |               |    |             | Missing       | -0.00104708  | 346          |              |     |
| psc.yrs.dur   | <  | 0.832306639 |               |    |             | Missing       | -0.00172425  | 346          |              |     |



|                |    |             |                |    |             |                    |         |              |              |     |
|----------------|----|-------------|----------------|----|-------------|--------------------|---------|--------------|--------------|-----|
| psc.yrs.dur    | >= | 0.832306639 | ALB.resultn    | =  | Missing     |                    | Missing | -0.000160604 | 346          |     |
| psc.yrs.dur    | >= | 0.832306639 | ALB.resultn    | <  | 3.33        |                    | Missing | 0.0034889    | 346          |     |
| psc.yrs.dur    | >= | 0.832306639 | ALB.resultn    | >= | 3.33        | TBILL.resultn      | =       | Missing      | -0.00084757  | 346 |
| psc.yrs.dur    | >= | 0.832306639 | ALB.resultn    | >= | 3.33        | TBILL.resultn      | <       | 0.75         | -0.001977662 | 346 |
| psc.yrs.dur    | >= | 0.832306639 | ALB.resultn    | >= | 3.33        | TBILL.resultn      | >=      | 0.75         | 0            | 346 |
| ALB.resultn    | =  | Missing     |                |    |             |                    | Missing | -0.003704859 | 347          |     |
| ALB.resultn    | <  | 3.13        |                |    |             |                    | Missing | 0.000404636  | 347          |     |
| ALB.resultn    | >= | 3.13        | TBILL.resultn  | =  | Missing     |                    | Missing | -0.002877635 | 347          |     |
| ALB.resultn    | >= | 3.13        | TBILL.resultn  | <  | 0.75        |                    | Missing | -0.003715929 | 347          |     |
| ALB.resultn    | >= | 3.13        | TBILL.resultn  | >= | 0.75        | age.yrs            | =       | Missing      | -0.00207039  | 347 |
| ALB.resultn    | >= | 3.13        | TBILL.resultn  | >= | 0.75        | age.yrs            | <       | 53.55509925  | -0.003105585 | 347 |
| ALB.resultn    | >= | 3.13        | TBILL.resultn  | >= | 0.75        | age.yrs            | >=      | 53.55509925  | 0            | 347 |
| psc.yrs.dur    | =  | Missing     |                |    |             |                    | Missing | -0.001253162 | 348          |     |
| psc.yrs.dur    | <  | 6.783025325 |                |    |             |                    | Missing | -0.001686633 | 348          |     |
| psc.yrs.dur    | >= | 6.783025325 | AST.resultn    | =  | Missing     |                    | Missing | 0.000934833  | 348          |     |
| psc.yrs.dur    | >= | 6.783025325 | AST.resultn    | <  | 42.5        |                    | Missing | -0.002288412 | 348          |     |
| psc.yrs.dur    | >= | 6.783025325 | AST.resultn    | >= | 42.5        | psc.yrs.dur        | =       | Missing      | 0.003317232  | 348 |
| psc.yrs.dur    | >= | 6.783025325 | AST.resultn    | >= | 42.5        | psc.yrs.dur        | <       | 9.863107461  | 0.007629635  | 348 |
| psc.yrs.dur    | >= | 6.783025325 | AST.resultn    | >= | 42.5        | psc.yrs.dur        | >=      | 9.863107461  | 0            | 348 |
| TBILL.resultn  | =  | Missing     |                |    |             |                    |         | 0.000337163  | 349          |     |
| TBILL.resultn  | <  | 2.35        | Sodium.resultn | =  | Missing     |                    |         | 0            | 349          |     |
| TBILL.resultn  | <  | 2.35        | Sodium.resultn | <  | 136.5       |                    |         | 0.003003516  | 349          |     |
| TBILL.resultn  | <  | 2.35        | Sodium.resultn | >= | 136.5       |                    |         | 0.000137166  | 349          |     |
| TBILL.resultn  | >= | 2.35        | age.yrs        | =  | Missing     |                    |         | 0.002869988  | 349          |     |
| TBILL.resultn  | >= | 2.35        | age.yrs        | <  | 49.84531143 |                    |         | 0.000466064  | 349          |     |
| TBILL.resultn  | >= | 2.35        | age.yrs        | >= | 49.84531143 |                    |         | 0.005514304  | 349          |     |
| age.yrs        | =  | Missing     |                |    |             |                    | Missing | 0.000982215  | 350          |     |
| age.yrs        | <  | 69.22108145 | AST.resultn    | =  | Missing     |                    | Missing | 0.000740089  | 350          |     |
| age.yrs        | <  | 69.22108145 | AST.resultn    | <  | 198.5       | PLT.resultn        | =       | Missing      | 0            | 350 |
| age.yrs        | <  | 69.22108145 | AST.resultn    | <  | 198.5       | PLT.resultn        | <       | 209.5        | 0.001957146  | 350 |
| age.yrs        | <  | 69.22108145 | AST.resultn    | <  | 198.5       | PLT.resultn        | >=      | 209.5        | 0.000215215  | 350 |
| age.yrs        | <  | 69.22108145 | AST.resultn    | >= | 198.5       |                    | Missing | 0.003642952  | 350          |     |
| age.yrs        | >= | 69.22108145 |                |    |             |                    | Missing | 0.00513294   | 350          |     |
| ALB.resultn    | =  | Missing     |                |    |             |                    | Missing | 0.001431718  | 351          |     |
| ALB.resultn    | <  | 3.13        |                |    |             |                    | Missing | 0.003340123  | 351          |     |
| ALB.resultn    | >= | 3.13        | PLT.resultn    | =  | Missing     |                    | Missing | 0.000966523  | 351          |     |
| ALB.resultn    | >= | 3.13        | PLT.resultn    | <  | 209.5       | Hemoglobin.resultn | =       | Missing      | 0.002373464  | 351 |
| ALB.resultn    | >= | 3.13        | PLT.resultn    | <  | 209.5       | Hemoglobin.resultn | <       | 13.85        | 0.006645698  | 351 |
| ALB.resultn    | >= | 3.13        | PLT.resultn    | <  | 209.5       | Hemoglobin.resultn | >=      | 13.85        | 0            | 351 |
| ALB.resultn    | >= | 3.13        | PLT.resultn    | >= | 209.5       |                    | Missing | 0.000160877  | 351          |     |
| ALK.times.uln  | =  | Missing     | ALB.resultn    | =  | Missing     |                    | Missing | -0.005908971 | 352          |     |
| ALK.times.uln  | =  | Missing     | ALB.resultn    | <  | 3.95        | age.yrs            | =       | Missing      | -0.002683977 | 352 |
| ALK.times.uln  | =  | Missing     | ALB.resultn    | <  | 3.95        | age.yrs            | <       | 50.88843258  | -0.005904749 | 352 |
| ALK.times.uln  | =  | Missing     | ALB.resultn    | <  | 3.95        | age.yrs            | >=      | 50.88843258  | 0            | 352 |
| ALK.times.uln  | =  | Missing     | ALB.resultn    | >= | 3.95        |                    | Missing | -0.005896131 | 352          |     |
| ALK.times.uln  | <  | 5.462893197 |                |    |             |                    | Missing | -0.005423259 | 352          |     |
| ALK.times.uln  | >= | 5.462893197 |                |    |             |                    | Missing | -0.002887363 | 352          |     |
| ALK.times.uln  | =  | Missing     | ALB.resultn    | =  | Missing     |                    |         | -0.001101449 | 353          |     |
| ALK.times.uln  | =  | Missing     | ALB.resultn    | <  | 3.95        |                    |         | 0.002269426  | 353          |     |
| ALK.times.uln  | =  | Missing     | ALB.resultn    | >= | 3.95        |                    |         | -0.001110412 | 353          |     |
| ALK.times.uln  | <  | 6.02173913  | PLT.resultn    | =  | Missing     |                    |         | 0            | 353          |     |
| ALK.times.uln  | <  | 6.02173913  | PLT.resultn    | <  | 209.5       |                    |         | 0.001145545  | 353          |     |
| ALK.times.uln  | <  | 6.02173913  | PLT.resultn    | >= | 209.5       |                    |         | -0.000973736 | 353          |     |
| ALK.times.uln  | >= | 6.02173913  |                |    |             |                    |         | 0.002132695  | 353          |     |
| Sodium.resultn | =  | Missing     |                |    |             |                    |         | 0.000261239  | 354          |     |
| Sodium.resultn | <  | 136.5       | TBILL.resultn  | =  | Missing     |                    |         | 0.003869444  | 354          |     |
| Sodium.resultn | <  | 136.5       | TBILL.resultn  | <  | 0.95        |                    |         | -8.71E-05    | 354          |     |
| Sodium.resultn | <  | 136.5       | TBILL.resultn  | >= | 0.95        |                    |         | 0.007825939  | 354          |     |
| Sodium.resultn | >= | 136.5       | PLT.resultn    | =  | Missing     |                    |         | 0.000946286  | 354          |     |
| Sodium.resultn | >= | 136.5       | PLT.resultn    | <  | 268         |                    |         | 0.001768061  | 354          |     |
| Sodium.resultn | >= | 136.5       | PLT.resultn    | >= | 268         |                    |         | 0            | 354          |     |
| ALB.resultn    | =  | Missing     |                |    |             |                    | Missing | 0.000678638  | 355          |     |

|                |    |                           |    |                           |         |              |              |     |
|----------------|----|---------------------------|----|---------------------------|---------|--------------|--------------|-----|
| ALB.resultn    | <  | 3.105                     |    |                           | Missing | 0.003618129  | 355          |     |
| ALB.resultn    | >= | 3.105 age.yrs             | =  | Missing                   | Missing | 0.000124456  | 355          |     |
| ALB.resultn    | >= | 3.105 age.yrs             | <  | 54.96783025               | Missing | -0.000261623 | 355          |     |
| ALB.resultn    | >= | 3.105 age.yrs             | >= | 54.96783025 age.yrs       | =       | Missing      | 0.001403341  | 355 |
| ALB.resultn    | >= | 3.105 age.yrs             | >= | 54.96783025 age.yrs       | <       | 57.27446954  | 0.006736037  | 355 |
| ALB.resultn    | >= | 3.105 age.yrs             | >= | 54.96783025 age.yrs       | >=      | 57.27446954  | 0            | 355 |
| ALB.resultn    | =  | Missing                   |    |                           |         | -6.88E-05    | 356          |     |
| ALB.resultn    | <  | 3.31 TBILI.resultn        | =  | Missing                   |         | 0.002386559  | 356          |     |
| ALB.resultn    | <  | 3.31 TBILI.resultn        | <  | 1.6                       |         | 0.001066125  | 356          |     |
| ALB.resultn    | <  | 3.31 TBILI.resultn        | >= | 1.6                       |         | 0.004067112  | 356          |     |
| ALB.resultn    | >= | 3.31 ALK.times.uln        | =  | Missing                   |         | 0            | 356          |     |
| ALB.resultn    | >= | 3.31 ALK.times.uln        | <  | 5.462893197               |         | -0.00022786  | 356          |     |
| ALB.resultn    | >= | 3.31 ALK.times.uln        | >= | 5.462893197               |         | 0.002086885  | 356          |     |
| age.yrs        | =  | Missing                   |    |                           | Missing | 0.000895965  | 357          |     |
| age.yrs        | <  | 49.03353867               |    |                           | Missing | 0.000129661  | 357          |     |
| age.yrs        | >= | 49.03353867 ALK.times.uln | =  | Missing                   | Missing | 0.001475485  | 357          |     |
| age.yrs        | >= | 49.03353867 ALK.times.uln | <  | 3.864888273 ALB.resultn   | =       | Missing      | 0.001332295  | 357 |
| age.yrs        | >= | 49.03353867 ALK.times.uln | <  | 3.864888273 ALB.resultn   | <       | 3.62         | 0.004529804  | 357 |
| age.yrs        | >= | 49.03353867 ALK.times.uln | <  | 3.864888273 ALB.resultn   | >=      | 3.62         | 0            | 357 |
| age.yrs        | >= | 49.03353867 ALK.times.uln | >= | 3.864888273               |         | Missing      | 0.007136675  | 357 |
| age.yrs        | =  | Missing                   |    |                           | Missing | -0.001541826 | 358          |     |
| age.yrs        | <  | 46.24093087               |    |                           | Missing | -0.002233583 | 358          |     |
| age.yrs        | >= | 46.24093087 AST.resultn   | =  | Missing                   | Missing | -0.000560189 | 358          |     |
| age.yrs        | >= | 46.24093087 AST.resultn   | <  | 51.5                      | Missing | -0.002515241 | 358          |     |
| age.yrs        | >= | 46.24093087 AST.resultn   | >= | 51.5 ALB.resultn          | =       | Missing      | 0.000948974  | 358 |
| age.yrs        | >= | 46.24093087 AST.resultn   | >= | 51.5 ALB.resultn          | <       | 3.645        | 0.003722898  | 358 |
| age.yrs        | >= | 46.24093087 AST.resultn   | >= | 51.5 ALB.resultn          | >=      | 3.645        | 0            | 358 |
| ALB.resultn    | =  | Missing                   |    |                           |         | -0.001061186 | 359          |     |
| ALB.resultn    | <  | 3.33 TBILI.resultn        | =  | Missing                   |         | 0.001107149  | 359          |     |
| ALB.resultn    | <  | 3.33 TBILI.resultn        | <  | 1.31                      |         | -0.000154526 | 359          |     |
| ALB.resultn    | <  | 3.33 TBILI.resultn        | >= | 1.31                      |         | 0.002659979  | 359          |     |
| ALB.resultn    | >= | 3.33 TBILI.resultn        | =  | Missing                   |         | -0.000855299 | 359          |     |
| ALB.resultn    | >= | 3.33 TBILI.resultn        | <  | 0.95                      |         | -0.001330465 | 359          |     |
| ALB.resultn    | >= | 3.33 TBILI.resultn        | >= | 0.95                      |         | 0            | 359          |     |
| ALB.resultn    | =  | Missing                   |    |                           | Missing | -0.005456752 | 360          |     |
| ALB.resultn    | <  | 2.915                     |    |                           | Missing | -0.001352933 | 360          |     |
| ALB.resultn    | >= | 2.915 age.yrs             | =  | Missing                   | Missing | -0.005105908 | 360          |     |
| ALB.resultn    | >= | 2.915 age.yrs             | <  | 51.76180698               | Missing | -0.005550736 | 360          |     |
| ALB.resultn    | >= | 2.915 age.yrs             | >= | 51.76180698 TBILI.resultn | =       | Missing      | -0.004151786 | 360 |
| ALB.resultn    | >= | 2.915 age.yrs             | >= | 51.76180698 TBILI.resultn | <       | 1.31         | -0.004939193 | 360 |
| ALB.resultn    | >= | 2.915 age.yrs             | >= | 51.76180698 TBILI.resultn | >=      | 1.31         | 0            | 360 |
| Sodium.resultn | =  | Missing                   |    |                           | Missing | -0.004051644 | 361          |     |
| Sodium.resultn | <  | 138.5 ALB.resultn         | =  | Missing                   | Missing | -0.001805233 | 361          |     |
| Sodium.resultn | <  | 138.5 ALB.resultn         | <  | 3.46                      | Missing | 0.000450118  | 361          |     |
| Sodium.resultn | <  | 138.5 ALB.resultn         | >= | 3.46 age.yrs              | =       | Missing      | -0.002306422 | 361 |
| Sodium.resultn | <  | 138.5 ALB.resultn         | >= | 3.46 age.yrs              | <       | 49.14852841  | -0.00370675  | 361 |
| Sodium.resultn | <  | 138.5 ALB.resultn         | >= | 3.46 age.yrs              | >=      | 49.14852841  | 0            | 361 |
| Sodium.resultn | >= | 138.5                     |    |                           | Missing | -0.00348317  | 361          |     |
| ALK.times.uln  | =  | Missing TBILI.resultn     | =  | Missing                   |         | -0.001650032 | 362          |     |
| ALK.times.uln  | =  | Missing TBILI.resultn     | <  | 1.25                      |         | -0.001650037 | 362          |     |
| ALK.times.uln  | =  | Missing TBILI.resultn     | >= | 1.25                      |         | 0.004158636  | 362          |     |
| ALK.times.uln  | <  | 5.462893197               |    |                           |         | -0.001267269 | 362          |     |
| ALK.times.uln  | >= | 5.462893197 AST.resultn   | =  | Missing                   |         | 0.002312308  | 362          |     |
| ALK.times.uln  | >= | 5.462893197 AST.resultn   | <  | 138                       |         | 0.004624616  | 362          |     |
| ALK.times.uln  | >= | 5.462893197 AST.resultn   | >= | 138                       |         | 0            | 362          |     |
| ALB.resultn    | =  | Missing                   |    |                           | Missing | -0.006023915 | 363          |     |
| ALB.resultn    | <  | 2.915                     |    |                           | Missing | -0.002491388 | 363          |     |
| ALB.resultn    | >= | 2.915 PLT.resultn         | =  | Missing                   | Missing | -0.005492439 | 363          |     |
| ALB.resultn    | >= | 2.915 PLT.resultn         | <  | 196.5 psc.yrs.dur         | =       | Missing      | -0.003205815 | 363 |
| ALB.resultn    | >= | 2.915 PLT.resultn         | <  | 196.5 psc.yrs.dur         | <       | 0.439425051  | -0.00641163  | 363 |
| ALB.resultn    | >= | 2.915 PLT.resultn         | <  | 196.5 psc.yrs.dur         | >=      | 0.439425051  | 0            | 363 |
| ALB.resultn    | >= | 2.915 PLT.resultn         | >= | 196.5                     | Missing | -0.006011535 | 363          |     |

|               |    |             |                |    |             |                |              |              |              |     |
|---------------|----|-------------|----------------|----|-------------|----------------|--------------|--------------|--------------|-----|
| psc.yrs.dur   | =  | Missing     |                |    | Missing     | -0.004757953   | 364          |              |              |     |
| psc.yrs.dur   | <  | 1.961670089 |                |    | Missing     | -0.00531829    | 364          |              |              |     |
| psc.yrs.dur   | >= | 1.961670089 | TBILL.resultn  | =  | Missing     | -0.003368624   | 364          |              |              |     |
| psc.yrs.dur   | >= | 1.961670089 | TBILL.resultn  | <  | 2.5 age.yrs | =              | Missing      | -0.003994273 | 364          |     |
| psc.yrs.dur   | >= | 1.961670089 | TBILL.resultn  | <  | 2.5 age.yrs | <              | 60.19712526  | -0.004777464 | 364          |     |
| psc.yrs.dur   | >= | 1.961670089 | TBILL.resultn  | <  | 2.5 age.yrs | >=             | 60.19712526  | 0            | 364          |     |
| psc.yrs.dur   | >= | 1.961670089 | TBILL.resultn  | >= | 2.5         | Missing        | 0.000447838  | 364          |              |     |
| TBILL.resultn | =  | Missing     |                |    | Missing     | -0.004829168   | 365          |              |              |     |
| TBILL.resultn | <  | 1.31        |                |    | Missing     | -0.004550275   | 365          |              |              |     |
| TBILL.resultn | >= | 1.31        | PLT.resultn    | =  | Missing     | Missing        | -0.001571215 | 365          |              |     |
| TBILL.resultn | >= | 1.31        | PLT.resultn    | <  | 199         | Missing        | 0.001374929  | 365          |              |     |
| TBILL.resultn | >= | 1.31        | PLT.resultn    | >= | 199         | Sodium.resultn | =            | Missing      | -0.002583951 | 365 |
| TBILL.resultn | >= | 1.31        | PLT.resultn    | >= | 199         | Sodium.resultn | <            | 139.5        | -0.004798767 | 365 |
| TBILL.resultn | >= | 1.31        | PLT.resultn    | >= | 199         | Sodium.resultn | >=           | 139.5        | 0            | 365 |
| ALK.times.uln | =  | Missing     | TBILL.resultn  | =  | Missing     |                | 1.09E-05     | 366          |              |     |
| ALK.times.uln | =  | Missing     | TBILL.resultn  | <  | 1.25        |                | 0.000624094  | 366          |              |     |
| ALK.times.uln | =  | Missing     | TBILL.resultn  | >= | 1.25        |                | 0.005469286  | 366          |              |     |
| ALK.times.uln | <  | 5.85        | TBILL.resultn  | =  | Missing     |                | 0.000431183  | 366          |              |     |
| ALK.times.uln | <  | 5.85        | TBILL.resultn  | <  | 1.35        |                | 0.000517419  | 366          |              |     |
| ALK.times.uln | <  | 5.85        | TBILL.resultn  | >= | 1.35        |                | 0            | 366          |              |     |
| ALK.times.uln | >= | 5.85        |                |    |             |                | 0.002625039  | 366          |              |     |
| ALB.resultn   | =  | Missing     |                |    |             | Missing        | -0.002354055 | 367          |              |     |
| ALB.resultn   | <  | 2.95        |                |    |             | Missing        | 0.001384917  | 367          |              |     |
| ALB.resultn   | >= | 2.95        | TBILL.resultn  | =  | Missing     | Missing        | -0.002299387 | 367          |              |     |
| ALB.resultn   | >= | 2.95        | TBILL.resultn  | <  | 0.85        | Missing        | -0.002797637 | 367          |              |     |
| ALB.resultn   | >= | 2.95        | TBILL.resultn  | >= | 0.85        | age.yrs        | =            | Missing      | -0.001475121 | 367 |
| ALB.resultn   | >= | 2.95        | TBILL.resultn  | >= | 0.85        | age.yrs        | <            | 51.63175907  | -0.002489268 | 367 |
| ALB.resultn   | >= | 2.95        | TBILL.resultn  | >= | 0.85        | age.yrs        | >=           | 51.63175907  | 0            | 367 |
| TBILL.resultn | =  | Missing     |                |    |             | Missing        | 0.000267437  | 368          |              |     |
| TBILL.resultn | <  | 1.55        |                |    |             | Missing        | -0.002217514 | 368          |              |     |
| TBILL.resultn | >= | 1.55        | PLT.resultn    | =  | Missing     | Missing        | 0.000591321  | 368          |              |     |
| TBILL.resultn | >= | 1.55        | PLT.resultn    | <  | 217         | Missing        | 0.005287317  | 368          |              |     |
| TBILL.resultn | >= | 1.55        | PLT.resultn    | >= | 217         | ALK.times.uln  | =            | Missing      | -0.001495788 | 368 |
| TBILL.resultn | >= | 1.55        | PLT.resultn    | >= | 217         | ALK.times.uln  | <            | 5.184046423  | -0.00249298  | 368 |
| TBILL.resultn | >= | 1.55        | PLT.resultn    | >= | 217         | ALK.times.uln  | >=           | 5.184046423  | 0            | 368 |
| PLT.resultn   | =  | Missing     |                |    |             |                | 0.001059812  | 369          |              |     |
| PLT.resultn   | <  | 204.5       | ALK.times.uln  | =  | Missing     |                | 0.001623164  | 369          |              |     |
| PLT.resultn   | <  | 204.5       | ALK.times.uln  | <  | 2.125523013 |                | 9.68E-06     | 369          |              |     |
| PLT.resultn   | <  | 204.5       | ALK.times.uln  | >= | 2.125523013 |                | 0.003559346  | 369          |              |     |
| PLT.resultn   | >= | 204.5       | Sodium.resultn | =  | Missing     |                | 0            | 369          |              |     |
| PLT.resultn   | >= | 204.5       | Sodium.resultn | <  | 138.5       |                | 0.003000346  | 369          |              |     |
| PLT.resultn   | >= | 204.5       | Sodium.resultn | >= | 138.5       |                | 0.000633862  | 369          |              |     |
| PLT.resultn   | =  | Missing     |                |    |             |                | -0.000949258 | 370          |              |     |
| PLT.resultn   | <  | 198.5       | ALB.resultn    | =  | Missing     |                | 0.001511637  | 370          |              |     |
| PLT.resultn   | <  | 198.5       | ALB.resultn    | <  | 3.75        |                | 0.004660582  | 370          |              |     |
| PLT.resultn   | <  | 198.5       | ALB.resultn    | >= | 3.75        |                | -0.000477171 | 370          |              |     |
| PLT.resultn   | >= | 198.5       | TBILL.resultn  | =  | Missing     |                | -0.000713694 | 370          |              |     |
| PLT.resultn   | >= | 198.5       | TBILL.resultn  | <  | 0.85        |                | -0.001209314 | 370          |              |     |
| PLT.resultn   | >= | 198.5       | TBILL.resultn  | >= | 0.85        |                | 0            | 370          |              |     |
| psc.yrs.dur   | =  | Missing     |                |    |             |                | -0.000626108 | 371          |              |     |
| psc.yrs.dur   | <  | 2.038329911 | TBILL.resultn  | =  | Missing     |                | -0.001138397 | 371          |              |     |
| psc.yrs.dur   | <  | 2.038329911 | TBILL.resultn  | <  | 1.95        |                | -0.001279813 | 371          |              |     |
| psc.yrs.dur   | <  | 2.038329911 | TBILL.resultn  | >= | 1.95        |                | 0            | 371          |              |     |
| psc.yrs.dur   | >= | 2.038329911 | ALK.times.uln  | =  | Missing     |                | 0.001418475  | 371          |              |     |
| psc.yrs.dur   | >= | 2.038329911 | ALK.times.uln  | <  | 2.731526287 |                | -0.000811158 | 371          |              |     |
| psc.yrs.dur   | >= | 2.038329911 | ALK.times.uln  | >= | 2.731526287 |                | 0.002949492  | 371          |              |     |
| age.yrs       | =  | Missing     |                |    |             | Missing        | 1.03E-05     | 372          |              |     |
| age.yrs       | <  | 53.46338125 |                |    |             | Missing        | -0.000513221 | 372          |              |     |
| age.yrs       | >= | 53.46338125 | AST.resultn    | =  | Missing     | Missing        | 0.001442144  | 372          |              |     |
| age.yrs       | >= | 53.46338125 | AST.resultn    | <  | 51.5        | Missing        | -0.001066622 | 372          |              |     |
| age.yrs       | >= | 53.46338125 | AST.resultn    | >= | 51.5        | PLT.resultn    | =            | Missing      | 0.003877123  | 372 |
| age.yrs       | >= | 53.46338125 | AST.resultn    | >= | 51.5        | PLT.resultn    | <            | 251.5        | 0.006121774  | 372 |

|               |    |             |                    |    |             |               |    |             |              |     |
|---------------|----|-------------|--------------------|----|-------------|---------------|----|-------------|--------------|-----|
| age.yrs       | >= | 53.46338125 | AST.resultn        | >= | 51.5        | PLT.resultn   | >= | 251.5       | 0            | 372 |
| PLT.resultn   | =  | Missing     |                    |    |             |               |    | Missing     | -0.001971835 | 373 |
| PLT.resultn   | <  | 185.5       |                    |    |             |               |    | Missing     | 0.001462519  | 373 |
| PLT.resultn   | >= | 185.5       | ALK.times.uln      | =  | Missing     | TBILI.resultn | =  | Missing     | -0.001935661 | 373 |
| PLT.resultn   | >= | 185.5       | ALK.times.uln      | =  | Missing     | TBILI.resultn | <  | 0.8         | -0.002903492 | 373 |
| PLT.resultn   | >= | 185.5       | ALK.times.uln      | =  | Missing     | TBILI.resultn | >= | 0.8         | 0            | 373 |
| PLT.resultn   | >= | 185.5       | ALK.times.uln      | <  | 5.446215139 |               |    | Missing     | -0.002695613 | 373 |
| PLT.resultn   | >= | 185.5       | ALK.times.uln      | >= | 5.446215139 |               |    | Missing     | -0.000248609 | 373 |
| ALB.resultn   | =  | Missing     |                    |    |             |               |    | Missing     | -0.002544255 | 374 |
| ALB.resultn   | <  | 2.915       |                    |    |             |               |    | Missing     | 0.000980217  | 374 |
| ALB.resultn   | >= | 2.915       | age.yrs            | =  | Missing     |               |    | Missing     | -0.002555886 | 374 |
| ALB.resultn   | >= | 2.915       | age.yrs            | <  | 49.41957563 |               |    | Missing     | -0.003122811 | 374 |
| ALB.resultn   | >= | 2.915       | age.yrs            | >= | 49.41957563 | AST.resultn   | =  | Missing     | -0.001445019 | 374 |
| ALB.resultn   | >= | 2.915       | age.yrs            | >= | 49.41957563 | AST.resultn   | <  | 50.5        | -0.003240346 | 374 |
| ALB.resultn   | >= | 2.915       | age.yrs            | >= | 49.41957563 | AST.resultn   | >= | 50.5        | 0            | 374 |
| TBILI.resultn | =  | Missing     |                    |    |             |               |    |             | -0.000120929 | 375 |
| TBILI.resultn | <  | 1.95        | TBILI.resultn      | =  | Missing     |               |    |             | -0.000648822 | 375 |
| TBILI.resultn | <  | 1.95        | TBILI.resultn      | <  | 0.75        |               |    |             | -0.001218656 | 375 |
| TBILI.resultn | <  | 1.95        | TBILI.resultn      | >= | 0.75        |               |    |             | 0            | 375 |
| TBILI.resultn | >= | 1.95        | PLT.resultn        | =  | Missing     |               |    |             | 0.001706861  | 375 |
| TBILI.resultn | >= | 1.95        | PLT.resultn        | <  | 225.5       |               |    |             | 0.003608811  | 375 |
| TBILI.resultn | >= | 1.95        | PLT.resultn        | >= | 225.5       |               |    |             | 7.66E-05     | 375 |
| ALB.resultn   | =  | Missing     |                    |    |             |               |    | Missing     | -0.003194295 | 376 |
| ALB.resultn   | <  | 2.95        |                    |    |             |               |    | Missing     | 0.000524089  | 376 |
| ALB.resultn   | >= | 2.95        | age.yrs            | =  | Missing     |               |    | Missing     | -0.002923012 | 376 |
| ALB.resultn   | >= | 2.95        | age.yrs            | <  | 53.35797399 |               |    | Missing     | -0.00326662  | 376 |
| ALB.resultn   | >= | 2.95        | age.yrs            | >= | 53.35797399 | TBILI.resultn | =  | Missing     | -0.00198261  | 376 |
| ALB.resultn   | >= | 2.95        | age.yrs            | >= | 53.35797399 | TBILI.resultn | <  | 1.31        | -0.002413613 | 376 |
| ALB.resultn   | >= | 2.95        | age.yrs            | >= | 53.35797399 | TBILI.resultn | >= | 1.31        | 0            | 376 |
| TBILI.resultn | =  | Missing     |                    |    |             |               |    |             | 0.00281328   | 377 |
| TBILI.resultn | <  | 1.65        | Sodium.resultn     | =  | Missing     |               |    |             | 0            | 377 |
| TBILI.resultn | <  | 1.65        | Sodium.resultn     | <  | 137.5       |               |    |             | 0.003231938  | 377 |
| TBILI.resultn | <  | 1.65        | Sodium.resultn     | >= | 137.5       |               |    |             | -8.20E-05    | 377 |
| TBILI.resultn | >= | 1.65        | Hemoglobin.resultn | =  | Missing     |               |    |             | 0.001610438  | 377 |
| TBILI.resultn | >= | 1.65        | Hemoglobin.resultn | <  | 12.95       |               |    |             | 0.004537195  | 377 |
| TBILI.resultn | >= | 1.65        | Hemoglobin.resultn | >= | 12.95       |               |    |             | -0.000340734 | 377 |
| ALK.times.uln | =  | Missing     | age.yrs            | =  | Missing     |               |    |             | -0.00216189  | 378 |
| ALK.times.uln | =  | Missing     | age.yrs            | <  | 53.44969199 |               |    |             | -0.003127841 | 378 |
| ALK.times.uln | =  | Missing     | age.yrs            | >= | 53.44969199 |               |    |             | 0            | 378 |
| ALK.times.uln | <  | 5.462893197 | ALB.resultn        | =  | Missing     |               |    |             | -0.002666328 | 378 |
| ALK.times.uln | <  | 5.462893197 | ALB.resultn        | <  | 3.08        |               |    |             | -0.000125477 | 378 |
| ALK.times.uln | <  | 5.462893197 | ALB.resultn        | >= | 3.08        |               |    |             | -0.002835718 | 378 |
| ALK.times.uln | >= | 5.462893197 |                    |    |             |               |    |             | 0.000784379  | 378 |
| TBILI.resultn | =  | Missing     |                    |    |             |               |    | Missing     | -0.005938705 | 379 |
| TBILI.resultn | <  | 0.95        |                    |    |             |               |    | Missing     | -0.006880494 | 379 |
| TBILI.resultn | >= | 0.95        | Hemoglobin.resultn | =  | Missing     | age.yrs       | =  | Missing     | -0.003242357 | 379 |
| TBILI.resultn | >= | 0.95        | Hemoglobin.resultn | =  | Missing     | age.yrs       | <  | 49.29637235 | -0.005944322 | 379 |
| TBILI.resultn | >= | 0.95        | Hemoglobin.resultn | =  | Missing     | age.yrs       | >= | 49.29637235 | 0            | 379 |
| TBILI.resultn | >= | 0.95        | Hemoglobin.resultn | <  | 13.35       |               |    | Missing     | -0.00532654  | 379 |
| TBILI.resultn | >= | 0.95        | Hemoglobin.resultn | >= | 13.35       |               |    | Missing     | -0.006753364 | 379 |
| ALB.resultn   | =  | Missing     |                    |    |             |               |    | Missing     | -0.00404714  | 380 |
| ALB.resultn   | <  | 3.105       |                    |    |             |               |    | Missing     | -0.001086208 | 380 |
| ALB.resultn   | >= | 3.105       | PLT.resultn        | =  | Missing     |               |    | Missing     | -0.003333546 | 380 |
| ALB.resultn   | >= | 3.105       | PLT.resultn        | <  | 249.5       | AST.resultn   | =  | Missing     | -0.002252804 | 380 |
| ALB.resultn   | >= | 3.105       | PLT.resultn        | <  | 249.5       | AST.resultn   | <  | 64.5        | -0.004076502 | 380 |
| ALB.resultn   | >= | 3.105       | PLT.resultn        | <  | 249.5       | AST.resultn   | >= | 64.5        | 0            | 380 |
| ALB.resultn   | >= | 3.105       | PLT.resultn        | >= | 249.5       |               |    | Missing     | -0.003954294 | 380 |
| ALB.resultn   | =  | Missing     |                    |    |             |               |    | Missing     | 0.000833641  | 381 |
| ALB.resultn   | <  | 3.62        | ALK.times.uln      | =  | Missing     |               |    | Missing     | 0.002032154  | 381 |
| ALB.resultn   | <  | 3.62        | ALK.times.uln      | <  | 5.689103147 | PLT.resultn   | =  | Missing     | 0.001174079  | 381 |
| ALB.resultn   | <  | 3.62        | ALK.times.uln      | <  | 5.689103147 | PLT.resultn   | <  | 243         | 0.004109275  | 381 |
| ALB.resultn   | <  | 3.62        | ALK.times.uln      | <  | 5.689103147 | PLT.resultn   | >= | 243         | 0            | 381 |

|               |    |             |                    |    |             |             |              |              |              |     |
|---------------|----|-------------|--------------------|----|-------------|-------------|--------------|--------------|--------------|-----|
| ALB.resultn   | <  | 3.62        | ALK.times.uln      | >= | 5.689103147 | Missing     | 0.004606382  | 381          |              |     |
| ALB.resultn   | >= | 3.62        |                    |    |             | Missing     | 0.00050623   | 381          |              |     |
| age.yrs       | =  | Missing     |                    |    |             | Missing     | -0.003669302 | 382          |              |     |
| age.yrs       | <  | 51.63175907 |                    |    |             | Missing     | -0.004295225 | 382          |              |     |
| age.yrs       | >= | 51.63175907 | TBILL.resultn      | =  | Missing     | Missing     | -0.002146787 | 382          |              |     |
| age.yrs       | >= | 51.63175907 | TBILL.resultn      | <  | 1.31        | age.yrs     | =            | Missing      | -0.00350836  | 382 |
| age.yrs       | >= | 51.63175907 | TBILL.resultn      | <  | 1.31        | age.yrs     | <            | 69.51266256  | -0.004210033 | 382 |
| age.yrs       | >= | 51.63175907 | TBILL.resultn      | <  | 1.31        | age.yrs     | >=           | 69.51266256  | 0            | 382 |
| age.yrs       | >= | 51.63175907 | TBILL.resultn      | >= | 1.31        |             | Missing      | 0.004661078  | 382          |     |
| ALB.resultn   | =  | Missing     |                    |    |             | Missing     | -0.002669777 | 383          |              |     |
| ALB.resultn   | <  | 2.95        |                    |    |             | Missing     | -0.000202307 | 383          |              |     |
| ALB.resultn   | >= | 2.95        | TBILL.resultn      | =  | Missing     | Missing     | -0.002548673 | 383          |              |     |
| ALB.resultn   | >= | 2.95        | TBILL.resultn      | <  | 0.85        | Missing     | -0.003183431 | 383          |              |     |
| ALB.resultn   | >= | 2.95        | TBILL.resultn      | >= | 0.85        | age.yrs     | =            | Missing      | -0.001706928 | 383 |
| ALB.resultn   | >= | 2.95        | TBILL.resultn      | >= | 0.85        | age.yrs     | <            | 51.92060233  | -0.002574384 | 383 |
| ALB.resultn   | >= | 2.95        | TBILL.resultn      | >= | 0.85        | age.yrs     | >=           | 51.92060233  | 0            | 383 |
| ALK.times.uln | =  | Missing     | ALB.resultn        | =  | Missing     |             | 0            | 384          |              |     |
| ALK.times.uln | =  | Missing     | ALB.resultn        | <  | 3.95        |             | 0.003156473  | 384          |              |     |
| ALK.times.uln | =  | Missing     | ALB.resultn        | >= | 3.95        |             | 3.94E-05     | 384          |              |     |
| ALK.times.uln | <  | 4.959168023 |                    |    |             |             | 0.000568116  | 384          |              |     |
| ALK.times.uln | >= | 4.959168023 | PLT.resultn        | =  | Missing     |             | 0.003028088  | 384          |              |     |
| ALK.times.uln | >= | 4.959168023 | PLT.resultn        | <  | 273         |             | 0.004671033  | 384          |              |     |
| ALK.times.uln | >= | 4.959168023 | PLT.resultn        | >= | 273         |             | 0.001658968  | 384          |              |     |
| ALB.resultn   | =  | Missing     |                    |    |             | Missing     | 0.000104313  | 385          |              |     |
| ALB.resultn   | <  | 2.915       |                    |    |             | Missing     | 0.004550999  | 385          |              |     |
| ALB.resultn   | >= | 2.915       | TBILL.resultn      | =  | Missing     | Missing     | 2.55E-05     | 385          |              |     |
| ALB.resultn   | >= | 2.915       | TBILL.resultn      | <  | 1.31        | Missing     | -0.000203718 | 385          |              |     |
| ALB.resultn   | >= | 2.915       | TBILL.resultn      | >= | 1.31        | ALB.resultn | =            | Missing      | 0.000948035  | 385 |
| ALB.resultn   | >= | 2.915       | TBILL.resultn      | >= | 1.31        | ALB.resultn | <            | 3.585        | 0.002654497  | 385 |
| ALB.resultn   | >= | 2.915       | TBILL.resultn      | >= | 1.31        | ALB.resultn | >=           | 3.585        | 0            | 385 |
| TBILL.resultn | =  | Missing     |                    |    |             | Missing     | -0.00144337  | 386          |              |     |
| TBILL.resultn | <  | 1.15        |                    |    |             | Missing     | -0.002768526 | 386          |              |     |
| TBILL.resultn | >= | 1.15        | Hemoglobin.resultn | =  | Missing     | Missing     | 0.002134286  | 386          |              |     |
| TBILL.resultn | >= | 1.15        | Hemoglobin.resultn | <  | 13.75       | age.yrs     | =            | Missing      | -0.001033631 | 386 |
| TBILL.resultn | >= | 1.15        | Hemoglobin.resultn | <  | 13.75       | age.yrs     | <            | 35.80561259  | -0.00234916  | 386 |
| TBILL.resultn | >= | 1.15        | Hemoglobin.resultn | <  | 13.75       | age.yrs     | >=           | 35.80561259  | 0            | 386 |
| TBILL.resultn | >= | 1.15        | Hemoglobin.resultn | >= | 13.75       |             | Missing      | -0.002658031 | 386          |     |
| PLT.resultn   | =  | Missing     |                    |    |             |             | -0.001297948 | 387          |              |     |
| PLT.resultn   | <  | 209.5       | ALB.resultn        | =  | Missing     |             | 0.000603286  | 387          |              |     |
| PLT.resultn   | <  | 209.5       | ALB.resultn        | <  | 3.92        |             | 0.003897899  | 387          |              |     |
| PLT.resultn   | <  | 209.5       | ALB.resultn        | >= | 3.92        |             | -0.000824379 | 387          |              |     |
| PLT.resultn   | >= | 209.5       | age.yrs            | =  | Missing     |             | -0.00113421  | 387          |              |     |
| PLT.resultn   | >= | 209.5       | age.yrs            | <  | 53.28268309 |             | -0.001506637 | 387          |              |     |
| PLT.resultn   | >= | 209.5       | age.yrs            | >= | 53.28268309 |             | 0            | 387          |              |     |
| ALB.resultn   | =  | Missing     |                    |    |             |             | -0.001217247 | 388          |              |     |
| ALB.resultn   | <  | 3.31        | TBILL.resultn      | =  | Missing     |             | 0.001673736  | 388          |              |     |
| ALB.resultn   | <  | 3.31        | TBILL.resultn      | <  | 1.55        |             | 0.000421515  | 388          |              |     |
| ALB.resultn   | <  | 3.31        | TBILL.resultn      | >= | 1.55        |             | 0.003214931  | 388          |              |     |
| ALB.resultn   | >= | 3.31        | TBILL.resultn      | =  | Missing     |             | -0.000754277 | 388          |              |     |
| ALB.resultn   | >= | 3.31        | TBILL.resultn      | <  | 0.95        |             | -0.001149094 | 388          |              |     |
| ALB.resultn   | >= | 3.31        | TBILL.resultn      | >= | 0.95        |             | 0            | 388          |              |     |
| psc.yrs.dur   | =  | Missing     |                    |    |             | Missing     | -0.003678607 | 389          |              |     |
| psc.yrs.dur   | <  | 6.201232033 |                    |    |             | Missing     | -0.004197718 | 389          |              |     |
| psc.yrs.dur   | >= | 6.201232033 | AST.resultn        | =  | Missing     | Missing     | -0.000634093 | 389          |              |     |
| psc.yrs.dur   | >= | 6.201232033 | AST.resultn        | <  | 43          | Missing     | -0.004704272 | 389          |              |     |
| psc.yrs.dur   | >= | 6.201232033 | AST.resultn        | >= | 43          | psc.yrs.dur | =            | Missing      | 0.002418541  | 389 |
| psc.yrs.dur   | >= | 6.201232033 | AST.resultn        | >= | 43          | psc.yrs.dur | <            | 9.590691307  | 0.004837083  | 389 |
| psc.yrs.dur   | >= | 6.201232033 | AST.resultn        | >= | 43          | psc.yrs.dur | >=           | 9.590691307  | 0            | 389 |
| ALK.times.uln | =  | Missing     |                    |    |             |             | -0.000497416 | 390          |              |     |
| ALK.times.uln | <  | 5.963877551 | PLT.resultn        | =  | Missing     |             | 0            | 390          |              |     |
| ALK.times.uln | <  | 5.963877551 | PLT.resultn        | <  | 186         |             | 0.003421951  | 390          |              |     |
| ALK.times.uln | <  | 5.963877551 | PLT.resultn        | >= | 186         |             | -0.000773169 | 390          |              |     |

|               |    |             |                    |    |             |               |    |              |              |     |
|---------------|----|-------------|--------------------|----|-------------|---------------|----|--------------|--------------|-----|
| ALK.times.uln | >= | 5.963877551 | PLT.resultn        | =  | Missing     |               |    | 0.003910708  | 390          |     |
| ALK.times.uln | >= | 5.963877551 | PLT.resultn        | <  | 272         |               |    | 0.006700628  | 390          |     |
| ALK.times.uln | >= | 5.963877551 | PLT.resultn        | >= | 272         |               |    | 0.000841795  | 390          |     |
| ALK.times.uln | =  | Missing     | TBILL.resultn      | =  | Missing     |               |    | -0.001709472 | 391          |     |
| ALK.times.uln | =  | Missing     | TBILL.resultn      | <  | 1.15        |               |    | -0.00106388  | 391          |     |
| ALK.times.uln | =  | Missing     | TBILL.resultn      | >= | 1.15        |               |    | 0.001902574  | 391          |     |
| ALK.times.uln | <  | 5.462893197 | age.yrs            | =  | Missing     |               |    | -0.001217397 | 391          |     |
| ALK.times.uln | <  | 5.462893197 | age.yrs            | <  | 56.79671458 |               |    | -0.001494892 | 391          |     |
| ALK.times.uln | <  | 5.462893197 | age.yrs            | >= | 56.79671458 |               |    | 0            | 391          |     |
| ALK.times.uln | >= | 5.462893197 |                    |    |             |               |    | 0.001314111  | 391          |     |
| AST.resultn   | =  | Missing     |                    |    |             | Missing       |    | -0.000305118 | 392          |     |
| AST.resultn   | <  | 43.5        |                    |    |             | Missing       |    | -0.001280995 | 392          |     |
| AST.resultn   | >= | 43.5        | age.yrs            | =  | Missing     | Missing       |    | 0.000308844  | 392          |     |
| AST.resultn   | >= | 43.5        | age.yrs            | <  | 53.35797399 | Missing       |    | -0.000468639 | 392          |     |
| AST.resultn   | >= | 43.5        | age.yrs            | >= | 53.35797399 | PLT.resultn   | =  | Missing      | 0.002704333  | 392 |
| AST.resultn   | >= | 43.5        | age.yrs            | >= | 53.35797399 | PLT.resultn   | <  | 251.5        | 0.004232869  | 392 |
| AST.resultn   | >= | 43.5        | age.yrs            | >= | 53.35797399 | PLT.resultn   | >= | 251.5        | 0            | 392 |
| ALK.times.uln | =  | Missing     | TBILL.resultn      | =  | Missing     |               |    | 0            | 393          |     |
| ALK.times.uln | =  | Missing     | TBILL.resultn      | <  | 1.15        |               |    | -1.29E-05    | 393          |     |
| ALK.times.uln | =  | Missing     | TBILL.resultn      | >= | 1.15        |               |    | 0.003873837  | 393          |     |
| ALK.times.uln | <  | 5.462893197 |                    |    |             |               |    | 0.000317004  | 393          |     |
| ALK.times.uln | >= | 5.462893197 | age.yrs            | =  | Missing     |               |    | 0.003124078  | 393          |     |
| ALK.times.uln | >= | 5.462893197 | age.yrs            | <  | 43.07049966 |               |    | 0.001023577  | 393          |     |
| ALK.times.uln | >= | 5.462893197 | age.yrs            | >= | 43.07049966 |               |    | 0.005049537  | 393          |     |
| ALB.resultn   | =  | Missing     |                    |    |             | Missing       |    | -0.001271666 | 394          |     |
| ALB.resultn   | <  | 2.915       |                    |    |             | Missing       |    | 0.005144952  | 394          |     |
| ALB.resultn   | >= | 2.915       | PLT.resultn        | =  | Missing     | Missing       |    | -0.001013688 | 394          |     |
| ALB.resultn   | >= | 2.915       | PLT.resultn        | <  | 246         | ALK.times.uln | =  | Missing      | 0            | 394 |
| ALB.resultn   | >= | 2.915       | PLT.resultn        | <  | 246         | ALK.times.uln | <  | 2.905037968  | -0.001909124 | 394 |
| ALB.resultn   | >= | 2.915       | PLT.resultn        | <  | 246         | ALK.times.uln | >= | 2.905037968  | 0.004769776  | 394 |
| ALB.resultn   | >= | 2.915       | PLT.resultn        | >= | 246         |               |    | Missing      | -0.001796058 | 394 |
| ALB.resultn   | =  | Missing     |                    |    |             | Missing       |    | Missing      | -0.003867789 | 395 |
| ALB.resultn   | <  | 3.735       | Hemoglobin.resultn | =  | Missing     | Missing       |    | Missing      | 0.005568732  | 395 |
| ALB.resultn   | <  | 3.735       | Hemoglobin.resultn | <  | 13.5        | ALK.times.uln | =  | Missing      | -0.001937213 | 395 |
| ALB.resultn   | <  | 3.735       | Hemoglobin.resultn | <  | 13.5        | ALK.times.uln | <  | 5.728910445  | -0.003013442 | 395 |
| ALB.resultn   | <  | 3.735       | Hemoglobin.resultn | <  | 13.5        | ALK.times.uln | >= | 5.728910445  | 0            | 395 |
| ALB.resultn   | <  | 3.735       | Hemoglobin.resultn | >= | 13.5        |               |    | Missing      | -0.003918478 | 395 |
| ALB.resultn   | >= | 3.735       |                    |    |             | Missing       |    | Missing      | -0.003410962 | 395 |
| age.yrs       | =  | Missing     |                    |    |             | Missing       |    | Missing      | -0.002662483 | 396 |
| age.yrs       | <  | 51.9945243  |                    |    |             | Missing       |    | Missing      | -0.003038005 | 396 |
| age.yrs       | >= | 51.9945243  | AST.resultn        | =  | Missing     | Missing       |    | Missing      | -0.001830631 | 396 |
| age.yrs       | >= | 51.9945243  | AST.resultn        | <  | 50.5        | Missing       |    | Missing      | -0.003532575 | 396 |
| age.yrs       | >= | 51.9945243  | AST.resultn        | >= | 50.5        | TBILL.resultn | =  | Missing      | -0.000336241 | 396 |
| age.yrs       | >= | 51.9945243  | AST.resultn        | >= | 50.5        | TBILL.resultn | <  | 1.55         | -0.00046378  | 396 |
| age.yrs       | >= | 51.9945243  | AST.resultn        | >= | 50.5        | TBILL.resultn | >= | 1.55         | 0            | 396 |
| TBILL.resultn | =  | Missing     |                    |    |             | Missing       |    | Missing      | -0.000959661 | 397 |
| TBILL.resultn | <  | 0.85        |                    |    |             | Missing       |    | Missing      | -0.002446212 | 397 |
| TBILL.resultn | >= | 0.85        | ALB.resultn        | =  | Missing     | Missing       |    | Missing      | -0.000324783 | 397 |
| TBILL.resultn | >= | 0.85        | ALB.resultn        | <  | 3.25        | Missing       |    | Missing      | 0.004462284  | 397 |
| TBILL.resultn | >= | 0.85        | ALB.resultn        | >= | 3.25        | ALK.times.uln | =  | Missing      | 0            | 397 |
| TBILL.resultn | >= | 0.85        | ALB.resultn        | >= | 3.25        | ALK.times.uln | <  | 2.781735492  | -0.002540567 | 397 |
| TBILL.resultn | >= | 0.85        | ALB.resultn        | >= | 3.25        | ALK.times.uln | >= | 2.781735492  | 0.000285488  | 397 |
| TBILL.resultn | =  | Missing     |                    |    |             |               |    |              | 0.001382482  | 398 |
| TBILL.resultn | <  | 2.25        | Sodium.resultn     | =  | Missing     |               |    |              | 0            | 398 |
| TBILL.resultn | <  | 2.25        | Sodium.resultn     | <  | 136.5       |               |    |              | 0.003874651  | 398 |
| TBILL.resultn | <  | 2.25        | Sodium.resultn     | >= | 136.5       |               |    |              | 0.000337498  | 398 |
| TBILL.resultn | >= | 2.25        | PLT.resultn        | =  | Missing     |               |    |              | 0.002105496  | 398 |
| TBILL.resultn | >= | 2.25        | PLT.resultn        | <  | 234.5       |               |    |              | 0.003891269  | 398 |
| TBILL.resultn | >= | 2.25        | PLT.resultn        | >= | 234.5       |               |    |              | 0.000482067  | 398 |
| ALB.resultn   | =  | Missing     |                    |    |             | Missing       |    | Missing      | -0.004178081 | 399 |
| ALB.resultn   | <  | 3.13        |                    |    |             | Missing       |    | Missing      | -0.001643925 | 399 |
| ALB.resultn   | >= | 3.13        | PLT.resultn        | =  | Missing     | Missing       |    | Missing      | -0.004566196 | 399 |

|               |    |             |                    |    |             |                |    |             |              |     |
|---------------|----|-------------|--------------------|----|-------------|----------------|----|-------------|--------------|-----|
| ALB.resultn   | >= | 3.13        | PLT.resultn        | <  | 209.5       | TBILL.resultn  | =  | Missing     | -0.002427868 | 399 |
| ALB.resultn   | >= | 3.13        | PLT.resultn        | <  | 209.5       | TBILL.resultn  | <  | 1.25        | -0.003455043 | 399 |
| ALB.resultn   | >= | 3.13        | PLT.resultn        | <  | 209.5       | TBILL.resultn  | >= | 1.25        | 0            | 399 |
| ALB.resultn   | >= | 3.13        | PLT.resultn        | >= | 209.5       |                |    | Missing     | -0.004123649 | 399 |
| TBILL.resultn | =  | Missing     |                    |    |             |                |    | Missing     | -0.000570171 | 400 |
| TBILL.resultn | <  | 1.55        |                    |    |             |                |    | Missing     | -0.001702675 | 400 |
| TBILL.resultn | >= | 1.55        | age.yrs            | =  | Missing     |                |    | Missing     | 0.000185801  | 400 |
| TBILL.resultn | >= | 1.55        | age.yrs            | <  | 46.56947296 | Sodium.resultn | =  | Missing     | -0.001050469 | 400 |
| TBILL.resultn | >= | 1.55        | age.yrs            | <  | 46.56947296 | Sodium.resultn | <  | 138.5       | -0.002100937 | 400 |
| TBILL.resultn | >= | 1.55        | age.yrs            | <  | 46.56947296 | Sodium.resultn | >= | 138.5       | 0            | 400 |
| TBILL.resultn | >= | 1.55        | age.yrs            | >= | 46.56947296 |                |    | Missing     | 0.001902843  | 400 |
| ALB.resultn   | =  | Missing     |                    |    |             |                |    | Missing     | -0.004078008 | 401 |
| ALB.resultn   | <  | 2.825       |                    |    |             |                |    | Missing     | -0.000599054 | 401 |
| ALB.resultn   | >= | 2.825       | age.yrs            | =  | Missing     |                |    | Missing     | -0.003968253 | 401 |
| ALB.resultn   | >= | 2.825       | age.yrs            | <  | 49.10198494 |                |    | Missing     | -0.004517966 | 401 |
| ALB.resultn   | >= | 2.825       | age.yrs            | >= | 49.10198494 | TBILL.resultn  | =  | Missing     | -0.002987118 | 401 |
| ALB.resultn   | >= | 2.825       | age.yrs            | >= | 49.10198494 | TBILL.resultn  | <  | 1.55        | -0.003650922 | 401 |
| ALB.resultn   | >= | 2.825       | age.yrs            | >= | 49.10198494 | TBILL.resultn  | >= | 1.55        | 0            | 401 |
| ALB.resultn   | =  | Missing     |                    |    |             |                |    | Missing     | -0.0007798   | 402 |
| ALB.resultn   | <  | 3.15        |                    |    |             |                |    | Missing     | 0.003190936  | 402 |
| ALB.resultn   | >= | 3.15        | TBILL.resultn      | =  | Missing     |                |    | Missing     | -0.000177028 | 402 |
| ALB.resultn   | >= | 3.15        | TBILL.resultn      | <  | 2.05        | ALK.times.uln  | =  | Missing     | 0            | 402 |
| ALB.resultn   | >= | 3.15        | TBILL.resultn      | <  | 2.05        | ALK.times.uln  | <  | 3.635579421 | -0.000787389 | 402 |
| ALB.resultn   | >= | 3.15        | TBILL.resultn      | <  | 2.05        | ALK.times.uln  | >= | 3.635579421 | 0.000453984  | 402 |
| ALB.resultn   | >= | 3.15        | TBILL.resultn      | >= | 2.05        |                |    | Missing     | 0.002485439  | 402 |
| ALB.resultn   | =  | Missing     | psc.yrs.dur        | =  | Missing     |                |    |             | 0.001123634  | 403 |
| ALB.resultn   | =  | Missing     | psc.yrs.dur        | <  | 0.058863792 |                |    |             | 0.004045084  | 403 |
| ALB.resultn   | =  | Missing     | psc.yrs.dur        | >= | 0.058863792 |                |    |             | 0            | 403 |
| ALB.resultn   | <  | 3.225       | Hemoglobin.resultn | =  | Missing     |                |    |             | 0.002762176  | 403 |
| ALB.resultn   | <  | 3.225       | Hemoglobin.resultn | <  | 11.45       |                |    |             | 0.004961772  | 403 |
| ALB.resultn   | <  | 3.225       | Hemoglobin.resultn | >= | 11.45       |                |    |             | 0.000762543  | 403 |
| ALB.resultn   | >= | 3.225       |                    |    |             |                |    |             | 0.000679273  | 403 |
| ALK.times.uln | =  | Missing     | TBILL.resultn      | =  | Missing     |                |    |             | -0.000400388 | 404 |
| ALK.times.uln | =  | Missing     | TBILL.resultn      | <  | 1.25        |                |    |             | -0.000402275 | 404 |
| ALK.times.uln | =  | Missing     | TBILL.resultn      | >= | 1.25        |                |    |             | 0.002417175  | 404 |
| ALK.times.uln | <  | 6.02173913  | Sodium.resultn     | =  | Missing     |                |    |             | 0            | 404 |
| ALK.times.uln | <  | 6.02173913  | Sodium.resultn     | <  | 137.5       |                |    |             | 0.002551739  | 404 |
| ALK.times.uln | <  | 6.02173913  | Sodium.resultn     | >= | 137.5       |                |    |             | -0.000253827 | 404 |
| ALK.times.uln | >= | 6.02173913  |                    |    |             |                |    |             | 0.00248464   | 404 |
| age.yrs       | =  | Missing     |                    |    |             |                |    | Missing     | -0.002250629 | 405 |
| age.yrs       | <  | 51.76180698 |                    |    |             |                |    | Missing     | -0.002652263 | 405 |
| age.yrs       | >= | 51.76180698 | ALK.times.uln      | =  | Missing     | TBILL.resultn  | =  | Missing     | -0.001723092 | 405 |
| age.yrs       | >= | 51.76180698 | ALK.times.uln      | =  | Missing     | TBILL.resultn  | <  | 1.1         | -0.003159001 | 405 |
| age.yrs       | >= | 51.76180698 | ALK.times.uln      | =  | Missing     | TBILL.resultn  | >= | 1.1         | 0            | 405 |
| age.yrs       | >= | 51.76180698 | ALK.times.uln      | <  | 3.33040955  |                |    | Missing     | -0.002315778 | 405 |
| age.yrs       | >= | 51.76180698 | ALK.times.uln      | >= | 3.33040955  |                |    | Missing     | 0.002194715  | 405 |
| TBILL.resultn | =  | Missing     |                    |    |             |                |    |             | 0.002416492  | 406 |
| TBILL.resultn | <  | 1.65        | Sodium.resultn     | =  | Missing     |                |    |             | 0            | 406 |
| TBILL.resultn | <  | 1.65        | Sodium.resultn     | <  | 136.5       |                |    |             | 0.002481882  | 406 |
| TBILL.resultn | <  | 1.65        | Sodium.resultn     | >= | 136.5       |                |    |             | 0.000718615  | 406 |
| TBILL.resultn | >= | 1.65        | Hemoglobin.resultn | =  | Missing     |                |    |             | 0.00145211   | 406 |
| TBILL.resultn | >= | 1.65        | Hemoglobin.resultn | <  | 12.55       |                |    |             | 0.003009895  | 406 |
| TBILL.resultn | >= | 1.65        | Hemoglobin.resultn | >= | 12.55       |                |    |             | -1.82E-06    | 406 |
| ALB.resultn   | =  | Missing     |                    |    |             |                |    | Missing     | -0.001193412 | 407 |
| ALB.resultn   | <  | 3.585       | PLT.resultn        | =  | Missing     |                |    | Missing     | 0.001403926  | 407 |
| ALB.resultn   | <  | 3.585       | PLT.resultn        | <  | 218         |                |    | Missing     | 0.009165077  | 407 |
| ALB.resultn   | <  | 3.585       | PLT.resultn        | >= | 218         | AST.resultn    | =  | Missing     | -0.001183124 | 407 |
| ALB.resultn   | <  | 3.585       | PLT.resultn        | >= | 218         | AST.resultn    | <  | 102.5       | -0.001971873 | 407 |
| ALB.resultn   | <  | 3.585       | PLT.resultn        | >= | 218         | AST.resultn    | >= | 102.5       | 0            | 407 |
| ALB.resultn   | >= | 3.585       |                    |    |             |                |    | Missing     | -0.001502607 | 407 |
| TBILL.resultn | =  | Missing     |                    |    |             |                |    |             | -0.00438524  | 408 |
| TBILL.resultn | <  | 2.05        | age.yrs            | =  | Missing     |                |    |             | -0.003603671 | 408 |

|               |    |                         |             |                            |         |             |              |     |
|---------------|----|-------------------------|-------------|----------------------------|---------|-------------|--------------|-----|
| TBILI.resultn | <  | 2.05 age.yrs            | <           | 69.51266256                |         |             | -0.003782071 | 408 |
| TBILI.resultn | <  | 2.05 age.yrs            | >=          | 69.51266256                |         |             | 0            | 408 |
| TBILI.resultn | >= | 2.05 PLT.resultn        | =           | Missing                    |         |             | -0.00207572  | 408 |
| TBILI.resultn | >= | 2.05 PLT.resultn        | <           | 243                        |         |             | -0.000532425 | 408 |
| TBILI.resultn | >= | 2.05 PLT.resultn        | >=          | 243                        |         |             | -0.003262871 | 408 |
| TBILI.resultn | =  | Missing                 |             |                            |         |             | -2.53E-05    | 409 |
| TBILI.resultn | <  | 1.55 ALK.times.uln      | =           | Missing                    |         |             | 0            | 409 |
| TBILI.resultn | <  | 1.55 ALK.times.uln      | <           | 2.822501299                |         |             | 0.000174844  | 409 |
| TBILI.resultn | <  | 1.55 ALK.times.uln      | >=          | 2.822501299                |         |             | 0.001774694  | 409 |
| TBILI.resultn | >= | 1.55 age.yrs            | =           | Missing                    |         |             | 0.002146484  | 409 |
| TBILI.resultn | >= | 1.55 age.yrs            | <           | 48.73511294                |         |             | 0.000424478  | 409 |
| TBILI.resultn | >= | 1.55 age.yrs            | >=          | 48.73511294                |         |             | 0.004780141  | 409 |
| ALB.resultn   | =  | Missing                 |             |                            |         | Missing     | -0.002692653 | 410 |
| ALB.resultn   | <  | 3.225                   |             |                            |         | Missing     | 0.000990626  | 410 |
| ALB.resultn   | >= | 3.225 age.yrs           | =           | Missing                    |         | Missing     | -0.002375784 | 410 |
| ALB.resultn   | >= | 3.225 age.yrs           | <           | 51.9945243                 |         | Missing     | -0.002806811 | 410 |
| ALB.resultn   | >= | 3.225 age.yrs           | >=          | 51.9945243 AST.resultn     | =       | Missing     | -0.001572773 | 410 |
| ALB.resultn   | >= | 3.225 age.yrs           | >=          | 51.9945243 AST.resultn     | <       | 51          | -0.003103039 | 410 |
| ALB.resultn   | >= | 3.225 age.yrs           | >=          | 51.9945243 AST.resultn     | >=      | 51          | 0            | 410 |
| ALB.resultn   | =  | Missing                 |             |                            |         | Missing     | -0.000558097 | 411 |
| ALB.resultn   | <  | 3.105                   |             |                            |         | Missing     | 0.003024979  | 411 |
| ALB.resultn   | >= | 3.105 TBILI.resultn     | =           | Missing                    |         | Missing     | 2.56E-05     | 411 |
| ALB.resultn   | >= | 3.105 TBILI.resultn     | <           | 0.95                       |         | Missing     | -0.000368352 | 411 |
| ALB.resultn   | >= | 3.105 TBILI.resultn     | >=          | 0.95 PLT.resultn           | =       | Missing     | 0.000855234  | 411 |
| ALB.resultn   | >= | 3.105 TBILI.resultn     | >=          | 0.95 PLT.resultn           | <       | 210.5       | 0.00285078   | 411 |
| ALB.resultn   | >= | 3.105 TBILI.resultn     | >=          | 0.95 PLT.resultn           | >=      | 210.5       | 0            | 411 |
| psc.yrs.dur   | =  | Missing                 |             |                            |         |             | 0.000485979  | 412 |
| psc.yrs.dur   | <  | 7.404517454 PLT.resultn | =           | Missing                    |         |             | 0            | 412 |
| psc.yrs.dur   | <  | 7.404517454 PLT.resultn | <           | 209.5                      |         |             | 0.001618949  | 412 |
| psc.yrs.dur   | <  | 7.404517454 PLT.resultn | >=          | 209.5                      |         |             | -0.000111788 | 412 |
| psc.yrs.dur   | >= | 7.404517454 ALB.resultn | =           | Missing                    |         |             | 0.00294116   | 412 |
| psc.yrs.dur   | >= | 7.404517454 ALB.resultn | <           | 3.45                       |         |             | 0.006717548  | 412 |
| psc.yrs.dur   | >= | 7.404517454 ALB.resultn | >=          | 3.45                       |         |             | 0.000953587  | 412 |
| ALB.resultn   | =  | Missing                 |             |                            |         | Missing     | 1.88E-05     | 413 |
| ALB.resultn   | <  | 3.135                   |             |                            |         | Missing     | 0.004752785  | 413 |
| ALB.resultn   | >= | 3.135 ALK.times.uln     | =           | Missing                    |         | Missing     | 0.00042757   | 413 |
| ALB.resultn   | >= | 3.135 ALK.times.uln     | <           | 5.391217738 PLT.resultn    | =       | Missing     | 0            | 413 |
| ALB.resultn   | >= | 3.135 ALK.times.uln     | <           | 5.391217738 PLT.resultn    | <       | 185.5       | 0.002920864  | 413 |
| ALB.resultn   | >= | 3.135 ALK.times.uln     | <           | 5.391217738 PLT.resultn    | >=      | 185.5       | 1.73E-05     | 413 |
| ALB.resultn   | >= | 3.135 ALK.times.uln     | >=          | 5.391217738                |         | Missing     | 0.003455133  | 413 |
| TBILI.resultn | =  | Missing                 |             |                            |         |             | -0.000358146 | 414 |
| TBILI.resultn | <  | 1.9 ALK.times.uln       | =           | Missing                    |         |             | 0            | 414 |
| TBILI.resultn | <  | 1.9 ALK.times.uln       | <           | 5.990825908                |         |             | -0.000855027 | 414 |
| TBILI.resultn | <  | 1.9 ALK.times.uln       | >=          | 5.990825908                |         |             | 0.002455079  | 414 |
| TBILI.resultn | >= | 1.9 Hemoglobin.resultn  | =           | Missing                    |         |             | 0.000781026  | 414 |
| TBILI.resultn | >= | 1.9 Hemoglobin.resultn  | <           | 13.35                      |         |             | 0.002870356  | 414 |
| TBILI.resultn | >= | 1.9 Hemoglobin.resultn  | >=          | 13.35                      |         |             | -0.001118364 | 414 |
| TBILI.resultn | =  | Missing                 |             |                            |         | Missing     | 0.000703017  | 415 |
| TBILI.resultn | <  | 2.35 age.yrs            | =           | Missing                    |         | Missing     | 0.00068936   | 415 |
| TBILI.resultn | <  | 2.35 age.yrs            | <           | 69.84257358 Sodium.resultn | =       | Missing     | 0            | 415 |
| TBILI.resultn | <  | 2.35 age.yrs            | <           | 69.84257358 Sodium.resultn | <       | 136.5       | 0.002408458  | 415 |
| TBILI.resultn | <  | 2.35 age.yrs            | <           | 69.84257358 Sodium.resultn | >=      | 136.5       | 0.00045373   | 415 |
| TBILI.resultn | <  | 2.35 age.yrs            | >=          | 69.84257358                |         | Missing     | 0.006321862  | 415 |
| TBILI.resultn | >= | 2.35                    |             |                            |         | Missing     | 0.002970917  | 415 |
| psc.yrs.dur   | =  | Missing                 |             |                            |         | Missing     | -0.004515636 | 416 |
| psc.yrs.dur   | <  | 1.961670089             |             |                            |         | Missing     | -0.005182164 | 416 |
| psc.yrs.dur   | >= | 1.961670089 ALB.resultn | =           | Missing                    |         | Missing     | -0.003011676 | 416 |
| psc.yrs.dur   | >= | 1.961670089 ALB.resultn | <           | 3.35                       |         | Missing     | -0.000582898 | 416 |
| psc.yrs.dur   | >= | 1.961670089 ALB.resultn | >=          | 3.35 age.yrs               | =       | Missing     | -0.003639808 | 416 |
| psc.yrs.dur   | >= | 1.961670089 ALB.resultn | >=          | 3.35 age.yrs               | <       | 53.35934292 | -0.004691308 | 416 |
| psc.yrs.dur   | >= | 1.961670089 ALB.resultn | >=          | 3.35 age.yrs               | >=      | 53.35934292 | 0            | 416 |
| ALK.times.uln | =  | Missing                 | ALB.resultn | =                          | Missing |             | -0.002008696 | 417 |



|               |    |             |                    |    |             |                |         |              |              |     |
|---------------|----|-------------|--------------------|----|-------------|----------------|---------|--------------|--------------|-----|
| ALK.times.uln | =  | Missing     | ALB.resultn        | <  | 3.45        |                |         | 0.0025819    | 417          |     |
| ALK.times.uln | =  | Missing     | ALB.resultn        | >= | 3.45        |                |         | -0.002000573 | 417          |     |
| ALK.times.uln | <  | 5.85        | psc.yrs.dur        | =  | Missing     |                |         | -0.001340567 | 417          |     |
| ALK.times.uln | <  | 5.85        | psc.yrs.dur        | <  | 2           |                |         | -0.001801067 | 417          |     |
| ALK.times.uln | <  | 5.85        | psc.yrs.dur        | >= | 2           |                |         | 0            | 417          |     |
| ALK.times.uln | >= | 5.85        |                    |    |             |                |         | 0.001201282  | 417          |     |
| ALB.resultn   | =  | Missing     |                    |    |             | Missing        |         | -0.000652133 | 418          |     |
| ALB.resultn   | <  | 2.95        |                    |    |             | Missing        |         | 0.002683743  | 418          |     |
| ALB.resultn   | >= | 2.95        | TBILL.resultn      | =  | Missing     | Missing        |         | -0.000367312 | 418          |     |
| ALB.resultn   | >= | 2.95        | TBILL.resultn      | <  | 2.45        | AST.resultn    | =       | Missing      | -0.000495981 | 418 |
| ALB.resultn   | >= | 2.95        | TBILL.resultn      | <  | 2.45        | AST.resultn    | <       | 47.5         | -0.001083177 | 418 |
| ALB.resultn   | >= | 2.95        | TBILL.resultn      | <  | 2.45        | AST.resultn    | >=      | 47.5         | 0            | 418 |
| ALB.resultn   | >= | 2.95        | TBILL.resultn      | >= | 2.45        |                | Missing |              | 0.001012311  | 418 |
| TBILL.resultn | =  | Missing     |                    |    |             |                |         | -0.001122988 | 419          |     |
| TBILL.resultn | <  | 2.45        | ALK.times.uln      | =  | Missing     |                |         | 0            | 419          |     |
| TBILL.resultn | <  | 2.45        | ALK.times.uln      | <  | 5.963877551 |                |         | -0.000730556 | 419          |     |
| TBILL.resultn | <  | 2.45        | ALK.times.uln      | >= | 5.963877551 |                |         | 0.003423229  | 419          |     |
| TBILL.resultn | >= | 2.45        | Hemoglobin.resultn | =  | Missing     |                |         | 0.000936869  | 419          |     |
| TBILL.resultn | >= | 2.45        | Hemoglobin.resultn | <  | 13.45       |                |         | 0.001910599  | 419          |     |
| TBILL.resultn | >= | 2.45        | Hemoglobin.resultn | >= | 13.45       |                |         | -3.69E-05    | 419          |     |
| ALK.times.uln | =  | Missing     |                    |    |             | Missing        |         | 0.000739195  | 420          |     |
| ALK.times.uln | <  | 5.462893197 | psc.yrs.dur        | =  | Missing     | Missing        |         | 0.000538339  | 420          |     |
| ALK.times.uln | <  | 5.462893197 | psc.yrs.dur        | <  | 2           | Missing        |         | 0.000127463  | 420          |     |
| ALK.times.uln | <  | 5.462893197 | psc.yrs.dur        | >= | 2           | Sodium.resultn | =       | Missing      | 0            | 420 |
| ALK.times.uln | <  | 5.462893197 | psc.yrs.dur        | >= | 2           | Sodium.resultn | <       | 140.5        | 0.005333138  | 420 |
| ALK.times.uln | <  | 5.462893197 | psc.yrs.dur        | >= | 2           | Sodium.resultn | >=      | 140.5        | 1.21E-08     | 420 |
| ALK.times.uln | >= | 5.462893197 |                    |    |             | Missing        |         | 0.002912957  | 420          |     |
| ALB.resultn   | =  | Missing     |                    |    |             |                |         | 0.001135608  | 421          |     |
| ALB.resultn   | <  | 3.34        | Sodium.resultn     | =  | Missing     |                |         | 0.003615835  | 421          |     |
| ALB.resultn   | <  | 3.34        | Sodium.resultn     | <  | 140.5       |                |         | 0.005709208  | 421          |     |
| ALB.resultn   | <  | 3.34        | Sodium.resultn     | >= | 140.5       |                |         | 0.00089445   | 421          |     |
| ALB.resultn   | >= | 3.34        | Sodium.resultn     | =  | Missing     |                |         | 0            | 421          |     |
| ALB.resultn   | >= | 3.34        | Sodium.resultn     | <  | 136.5       |                |         | 0.002206029  | 421          |     |
| ALB.resultn   | >= | 3.34        | Sodium.resultn     | >= | 136.5       |                |         | 0.000238387  | 421          |     |
| age.yrs       | =  | Missing     |                    |    |             | Missing        |         | -0.006118681 | 422          |     |
| age.yrs       | <  | 49.03353867 |                    |    |             | Missing        |         | -0.006907748 | 422          |     |
| age.yrs       | >= | 49.03353867 | ALK.times.uln      | =  | Missing     | AST.resultn    | =       | Missing      | -0.004363283 | 422 |
| age.yrs       | >= | 49.03353867 | ALK.times.uln      | =  | Missing     | AST.resultn    | <       | 64.5         | -0.006981253 | 422 |
| age.yrs       | >= | 49.03353867 | ALK.times.uln      | =  | Missing     | AST.resultn    | >=      | 64.5         | 0            | 422 |
| age.yrs       | >= | 49.03353867 | ALK.times.uln      | <  | 3.904220484 |                | Missing |              | -0.006122383 | 422 |
| age.yrs       | >= | 49.03353867 | ALK.times.uln      | >= | 3.904220484 |                | Missing |              | -0.000671806 | 422 |
| ALB.resultn   | =  | Missing     |                    |    |             |                |         | -0.000891973 | 423          |     |
| ALB.resultn   | <  | 3.345       | PLT.resultn        | =  | Missing     |                |         | 0.001006365  | 423          |     |
| ALB.resultn   | <  | 3.345       | PLT.resultn        | <  | 264.5       |                |         | 0.002891974  | 423          |     |
| ALB.resultn   | <  | 3.345       | PLT.resultn        | >= | 264.5       |                |         | -0.000879243 | 423          |     |
| ALB.resultn   | >= | 3.345       | age.yrs            | =  | Missing     |                |         | -0.001251269 | 423          |     |
| ALB.resultn   | >= | 3.345       | age.yrs            | <  | 53.46475017 |                |         | -0.001701726 | 423          |     |
| ALB.resultn   | >= | 3.345       | age.yrs            | >= | 53.46475017 |                |         | 0            | 423          |     |
| ALB.resultn   | =  | Missing     |                    |    |             | Missing        |         | -0.003436742 | 424          |     |
| ALB.resultn   | <  | 2.825       |                    |    |             | Missing        |         | 0.00062716   | 424          |     |
| ALB.resultn   | >= | 2.825       | psc.yrs.dur        | =  | Missing     | Missing        |         | -0.003320252 | 424          |     |
| ALB.resultn   | >= | 2.825       | psc.yrs.dur        | <  | 1.397672827 |                | Missing | -0.003786164 | 424          |     |
| ALB.resultn   | >= | 2.825       | psc.yrs.dur        | >= | 1.397672827 | age.yrs        | =       | Missing      | -0.002343131 | 424 |
| ALB.resultn   | >= | 2.825       | psc.yrs.dur        | >= | 1.397672827 | age.yrs        | <       | 51.63175907  | -0.003514697 | 424 |
| ALB.resultn   | >= | 2.825       | psc.yrs.dur        | >= | 1.397672827 | age.yrs        | >=      | 51.63175907  | 0            | 424 |
| ALB.resultn   | =  | Missing     |                    |    |             | Missing        |         | -0.00383613  | 425          |     |
| ALB.resultn   | <  | 2.915       |                    |    |             | Missing        |         | -0.001283854 | 425          |     |
| ALB.resultn   | >= | 2.915       | psc.yrs.dur        | =  | Missing     | Missing        |         | -0.004116242 | 425          |     |
| ALB.resultn   | >= | 2.915       | psc.yrs.dur        | <  | 6.592744695 |                | Missing | -0.004451711 | 425          |     |
| ALB.resultn   | >= | 2.915       | psc.yrs.dur        | >= | 6.592744695 | AST.resultn    | =       | Missing      | -0.00199161  | 425 |
| ALB.resultn   | >= | 2.915       | psc.yrs.dur        | >= | 6.592744695 | AST.resultn    | <       | 47           | -0.004596024 | 425 |
| ALB.resultn   | >= | 2.915       | psc.yrs.dur        | >= | 6.592744695 | AST.resultn    | >=      | 47           | 0            | 425 |

|               |    |                 |                |             |             |             |         |             |  |              |     |
|---------------|----|-----------------|----------------|-------------|-------------|-------------|---------|-------------|--|--------------|-----|
| TBILL.resultn | =  | Missing         |                |             |             |             |         |             |  | -0.00196295  | 426 |
| TBILL.resultn | <  | 1.9 age.yrs     | =              | Missing     |             |             |         |             |  | -0.002151729 | 426 |
| TBILL.resultn | <  | 1.9 age.yrs     | <              | 63.30047912 |             |             |         |             |  | -0.002460754 | 426 |
| TBILL.resultn | <  | 1.9 age.yrs     | >=             | 63.30047912 |             |             |         |             |  | 0            | 426 |
| TBILL.resultn | >= | 1.9 ALB.resultn | =              | Missing     |             |             |         |             |  | -0.000610027 | 426 |
| TBILL.resultn | >= | 1.9 ALB.resultn | <              | 3.35        |             |             |         |             |  | 0.000720226  | 426 |
| TBILL.resultn | >= | 1.9 ALB.resultn | >=             | 3.35        |             |             |         |             |  | -0.00147078  | 426 |
| ALK.times.uln | =  | Missing         | ALB.resultn    | =           | Missing     |             |         |             |  | -0.001748809 | 427 |
| ALK.times.uln | =  | Missing         | ALB.resultn    | <           | 3.95        |             |         |             |  | 0.001680518  | 427 |
| ALK.times.uln | =  | Missing         | ALB.resultn    | >=          | 3.95        |             |         |             |  | -0.001736862 | 427 |
| ALK.times.uln | <  | 6.02            | TBILL.resultn  | =           | Missing     |             |         |             |  | -0.001411579 | 427 |
| ALK.times.uln | <  | 6.02            | TBILL.resultn  | <           | 2.05        |             |         |             |  | -0.001603631 | 427 |
| ALK.times.uln | <  | 6.02            | TBILL.resultn  | >=          | 2.05        |             |         |             |  | 0            | 427 |
| ALK.times.uln | >= | 6.02            |                |             |             |             |         |             |  | 0.001781603  | 427 |
| ALB.resultn   | =  | Missing         |                |             |             |             | Missing |             |  | -0.001692375 | 428 |
| ALB.resultn   | <  | 3.105           |                |             |             |             | Missing |             |  | 0.000289409  | 428 |
| ALB.resultn   | >= | 3.105           | PLT.resultn    | =           | Missing     |             | Missing |             |  | -0.002223309 | 428 |
| ALB.resultn   | >= | 3.105           | PLT.resultn    | <           | 249.5       | AST.resultn | =       | Missing     |  | -0.001592896 | 428 |
| ALB.resultn   | >= | 3.105           | PLT.resultn    | <           | 249.5       | AST.resultn | <       | 64.5        |  | -0.002926484 | 428 |
| ALB.resultn   | >= | 3.105           | PLT.resultn    | <           | 249.5       | AST.resultn | >=      | 64.5        |  | 0            | 428 |
| ALB.resultn   | >= | 3.105           | PLT.resultn    | >=          | 249.5       |             | Missing |             |  | -0.002798227 | 428 |
| TBILL.resultn | =  | Missing         |                |             |             |             |         |             |  | -0.000877763 | 429 |
| TBILL.resultn | <  | 2.35            | ALK.times.uln  | =           | Missing     |             |         |             |  | 0            | 429 |
| TBILL.resultn | <  | 2.35            | ALK.times.uln  | <           | 5.963877551 |             |         |             |  | -0.000520645 | 429 |
| TBILL.resultn | <  | 2.35            | ALK.times.uln  | >=          | 5.963877551 |             |         |             |  | 0.002049585  | 429 |
| TBILL.resultn | >= | 2.35            | PLT.resultn    | =           | Missing     |             |         |             |  | 0.001330296  | 429 |
| TBILL.resultn | >= | 2.35            | PLT.resultn    | <           | 249.5       |             |         |             |  | 0.002507083  | 429 |
| TBILL.resultn | >= | 2.35            | PLT.resultn    | >=          | 249.5       |             |         |             |  | -0.000167432 | 429 |
| psc.yrs.dur   | =  | Missing         |                |             |             |             |         |             |  | 0.000967727  | 430 |
| psc.yrs.dur   | <  | 6.379192334     | PLT.resultn    | =           | Missing     |             |         |             |  | 0            | 430 |
| psc.yrs.dur   | <  | 6.379192334     | PLT.resultn    | <           | 209.5       |             |         |             |  | 0.002153164  | 430 |
| psc.yrs.dur   | <  | 6.379192334     | PLT.resultn    | >=          | 209.5       |             |         |             |  | 0.000340546  | 430 |
| psc.yrs.dur   | >= | 6.379192334     | AST.resultn    | =           | Missing     |             |         |             |  | 0.00317657   | 430 |
| psc.yrs.dur   | >= | 6.379192334     | AST.resultn    | <           | 43          |             |         |             |  | 2.64E-05     | 430 |
| psc.yrs.dur   | >= | 6.379192334     | AST.resultn    | >=          | 43          |             |         |             |  | 0.005876739  | 430 |
| ALK.times.uln | =  | Missing         | TBILL.resultn  | =           | Missing     |             |         | Missing     |  | -0.003694971 | 431 |
| ALK.times.uln | =  | Missing         | TBILL.resultn  | <           | 0.95        |             |         | Missing     |  | -0.004528134 | 431 |
| ALK.times.uln | =  | Missing         | TBILL.resultn  | >=          | 0.95        | age.yrs     | =       | Missing     |  | -0.00234604  | 431 |
| ALK.times.uln | =  | Missing         | TBILL.resultn  | >=          | 0.95        | age.yrs     | <       | 53.46475017 |  | -0.004478803 | 431 |
| ALK.times.uln | =  | Missing         | TBILL.resultn  | >=          | 0.95        | age.yrs     | >=      | 53.46475017 |  | 0            | 431 |
| ALK.times.uln | <  | 6.02            |                |             |             |             |         | Missing     |  | -0.004044166 | 431 |
| ALK.times.uln | >= | 6.02            |                |             |             |             |         | Missing     |  | -0.000132804 | 431 |
| ALB.resultn   | =  | Missing         |                |             |             |             |         |             |  | -0.000542224 | 432 |
| ALB.resultn   | <  | 3.225           | TBILL.resultn  | =           | Missing     |             |         |             |  | 0.001875755  | 432 |
| ALB.resultn   | <  | 3.225           | TBILL.resultn  | <           | 1.6         |             |         |             |  | 0.000472278  | 432 |
| ALB.resultn   | <  | 3.225           | TBILL.resultn  | >=          | 1.6         |             |         |             |  | 0.003559927  | 432 |
| ALB.resultn   | >= | 3.225           | TBILL.resultn  | =           | Missing     |             |         |             |  | -0.000974437 | 432 |
| ALB.resultn   | >= | 3.225           | TBILL.resultn  | <           | 1.25        |             |         |             |  | -0.001233084 | 432 |
| ALB.resultn   | >= | 3.225           | TBILL.resultn  | >=          | 1.25        |             |         |             |  | 0            | 432 |
| ALB.resultn   | =  | Missing         |                |             |             |             |         |             |  | -0.000308182 | 433 |
| ALB.resultn   | <  | 3.31            | TBILL.resultn  | =           | Missing     |             |         |             |  | 0.002246536  | 433 |
| ALB.resultn   | <  | 3.31            | TBILL.resultn  | <           | 1.31        |             |         |             |  | 0.000436803  | 433 |
| ALB.resultn   | <  | 3.31            | TBILL.resultn  | >=          | 1.31        |             |         |             |  | 0.005043395  | 433 |
| ALB.resultn   | >= | 3.31            | Sodium.resultn | =           | Missing     |             |         |             |  | 0            | 433 |
| ALB.resultn   | >= | 3.31            | Sodium.resultn | <           | 136.5       |             |         |             |  | 0.003387268  | 433 |
| ALB.resultn   | >= | 3.31            | Sodium.resultn | >=          | 136.5       |             |         |             |  | 8.53E-06     | 433 |
| TBILL.resultn | =  | Missing         |                |             |             |             |         |             |  | -0.003000998 | 434 |
| TBILL.resultn | <  | 1.65            | age.yrs        | =           | Missing     |             |         |             |  | -0.002362677 | 434 |
| TBILL.resultn | <  | 1.65            | age.yrs        | <           | 63.30047912 |             |         |             |  | -0.002559567 | 434 |
| TBILL.resultn | <  | 1.65            | age.yrs        | >=          | 63.30047912 |             |         |             |  | 0            | 434 |
| TBILL.resultn | >= | 1.65            | PLT.resultn    | =           | Missing     |             |         |             |  | -0.00083944  | 434 |
| TBILL.resultn | >= | 1.65            | PLT.resultn    | <           | 237.5       |             |         |             |  | 0.00144085   | 434 |

|               |    |             |                    |    |             |               |    |         |   |              |     |
|---------------|----|-------------|--------------------|----|-------------|---------------|----|---------|---|--------------|-----|
| TBILI.resultn | >= | 1.65        | PLT.resultn        | >= | 237.5       |               |    |         |   | -0.002359634 | 434 |
| ALB.resultn   | =  | Missing     |                    |    |             |               |    | Missing |   | -0.002777343 | 435 |
| ALB.resultn   | <  | 3.15        |                    |    |             |               |    | Missing |   | 0.000918082  | 435 |
| ALB.resultn   | >= | 3.15        | ALK.times.uln      | =  | Missing     | TBILI.resultn | =  | Missing |   | -0.002449942 | 435 |
| ALB.resultn   | >= | 3.15        | ALK.times.uln      | =  | Missing     | TBILI.resultn | <  | 1.15    |   | -0.003215549 | 435 |
| ALB.resultn   | >= | 3.15        | ALK.times.uln      | =  | Missing     | TBILI.resultn | >= | 1.15    | 0 |              | 435 |
| ALB.resultn   | >= | 3.15        | ALK.times.uln      | <  | 5.857962963 |               |    | Missing |   | -0.002797371 | 435 |
| ALB.resultn   | >= | 3.15        | ALK.times.uln      | >= | 5.857962963 |               |    | Missing |   | -0.000147981 | 435 |
| ALB.resultn   | =  | Missing     |                    |    |             |               |    |         |   | -0.000327334 | 436 |
| ALB.resultn   | <  | 3.225       | psc.yrs.dur        | =  | Missing     |               |    |         |   | 0.002529605  | 436 |
| ALB.resultn   | <  | 3.225       | psc.yrs.dur        | <  | 2.543463381 |               |    |         |   | -0.000121915 | 436 |
| ALB.resultn   | <  | 3.225       | psc.yrs.dur        | >= | 2.543463381 |               |    |         |   | 0.005181125  | 436 |
| ALB.resultn   | >= | 3.225       | TBILI.resultn      | =  | Missing     |               |    |         |   | -0.000848738 | 436 |
| ALB.resultn   | >= | 3.225       | TBILI.resultn      | <  | 0.95        |               |    |         |   | -0.00130431  | 436 |
| ALB.resultn   | >= | 3.225       | TBILI.resultn      | >= | 0.95        |               |    |         |   | 0            | 436 |
| ALK.times.uln | =  | Missing     | TBILI.resultn      | =  | Missing     |               |    |         |   | -0.002192783 | 437 |
| ALK.times.uln | =  | Missing     | TBILI.resultn      | <  | 1.15        |               |    |         |   | -0.00180071  | 437 |
| ALK.times.uln | =  | Missing     | TBILI.resultn      | >= | 1.15        |               |    |         |   | 0.000575759  | 437 |
| ALK.times.uln | <  | 6.418326693 | psc.yrs.dur        | =  | Missing     |               |    |         |   | -0.001639496 | 437 |
| ALK.times.uln | <  | 6.418326693 | psc.yrs.dur        | <  | 1.954825462 |               |    |         |   | -0.002173575 | 437 |
| ALK.times.uln | <  | 6.418326693 | psc.yrs.dur        | >= | 1.954825462 |               |    |         |   | 0            | 437 |
| ALK.times.uln | >= | 6.418326693 |                    |    |             |               |    |         |   | 0.001342242  | 437 |
| TBILI.resultn | =  | Missing     |                    |    |             |               |    | Missing |   | -0.000929435 | 438 |
| TBILI.resultn | <  | 3.5         | PLT.resultn        | =  | Missing     |               |    | Missing |   | -0.001502075 | 438 |
| TBILI.resultn | <  | 3.5         | PLT.resultn        | <  | 185.5       |               |    | Missing |   | 0.001672381  | 438 |
| TBILI.resultn | <  | 3.5         | PLT.resultn        | >= | 185.5       | ALB.resultn   | =  | Missing |   | 0            | 438 |
| TBILI.resultn | <  | 3.5         | PLT.resultn        | >= | 185.5       | ALB.resultn   | <  | 3.59    |   | -0.001479868 | 438 |
| TBILI.resultn | <  | 3.5         | PLT.resultn        | >= | 185.5       | ALB.resultn   | >= | 3.59    |   | -0.002299993 | 438 |
| TBILI.resultn | >= | 3.5         |                    |    |             |               |    | Missing |   | 9.87E-05     | 438 |
| ALB.resultn   | =  | Missing     |                    |    |             |               |    | Missing |   | -0.002348687 | 439 |
| ALB.resultn   | <  | 2.965       |                    |    |             |               |    | Missing |   | 0.001493927  | 439 |
| ALB.resultn   | >= | 2.965       | ALK.times.uln      | =  | Missing     | TBILI.resultn | =  | Missing |   | -0.002045961 | 439 |
| ALB.resultn   | >= | 2.965       | ALK.times.uln      | =  | Missing     | TBILI.resultn | <  | 0.95    |   | -0.00294859  | 439 |
| ALB.resultn   | >= | 2.965       | ALK.times.uln      | =  | Missing     | TBILI.resultn | >= | 0.95    | 0 |              | 439 |
| ALB.resultn   | >= | 2.965       | ALK.times.uln      | <  | 5.462893197 |               |    | Missing |   | -0.002639006 | 439 |
| ALB.resultn   | >= | 2.965       | ALK.times.uln      | >= | 5.462893197 |               |    | Missing |   | -0.000222401 | 439 |
| age.yrs       | =  | Missing     |                    |    |             |               |    |         |   | 0.000242662  | 440 |
| age.yrs       | <  | 63.21560575 | ALK.times.uln      | =  | Missing     |               |    |         |   | 0            | 440 |
| age.yrs       | <  | 63.21560575 | ALK.times.uln      | <  | 6.02        |               |    |         |   | -0.000339745 | 440 |
| age.yrs       | <  | 63.21560575 | ALK.times.uln      | >= | 6.02        |               |    |         |   | 0.001734905  | 440 |
| age.yrs       | >= | 63.21560575 | ALB.resultn        | =  | Missing     |               |    |         |   | 0.003048412  | 440 |
| age.yrs       | >= | 63.21560575 | ALB.resultn        | <  | 4           |               |    |         |   | 0.006137132  | 440 |
| age.yrs       | >= | 63.21560575 | ALB.resultn        | >= | 4           |               |    |         |   | -0.000658051 | 440 |
| ALB.resultn   | =  | Missing     |                    |    |             |               |    | Missing |   | 0.000444451  | 441 |
| ALB.resultn   | <  | 3.105       |                    |    |             |               |    | Missing |   | 0.003191416  | 441 |
| ALB.resultn   | >= | 3.105       | TBILI.resultn      | =  | Missing     |               |    | Missing |   | 0.000651867  | 441 |
| ALB.resultn   | >= | 3.105       | TBILI.resultn      | <  | 0.75        |               |    | Missing |   | 1.90E-06     | 441 |
| ALB.resultn   | >= | 3.105       | TBILI.resultn      | >= | 0.75        | PLT.resultn   | =  | Missing |   | 0.001283262  | 441 |
| ALB.resultn   | >= | 3.105       | TBILI.resultn      | >= | 0.75        | PLT.resultn   | <  | 249.5   |   | 0.002309872  | 441 |
| ALB.resultn   | >= | 3.105       | TBILI.resultn      | >= | 0.75        | PLT.resultn   | >= | 249.5   | 0 |              | 441 |
| ALB.resultn   | =  | Missing     | psc.yrs.dur        | =  | Missing     |               |    |         |   | 0.001160918  | 442 |
| ALB.resultn   | =  | Missing     | psc.yrs.dur        | <  | 0.258726899 |               |    |         |   | 0.003115636  | 442 |
| ALB.resultn   | =  | Missing     | psc.yrs.dur        | >= | 0.258726899 |               |    |         |   | 1.11E-05     | 442 |
| ALB.resultn   | <  | 3.225       |                    |    |             |               |    |         |   | 0.004158726  | 442 |
| ALB.resultn   | >= | 3.225       | Hemoglobin.resultn | =  | Missing     |               |    |         |   | 0            | 442 |
| ALB.resultn   | >= | 3.225       | Hemoglobin.resultn | <  | 14.15       |               |    |         |   | 0.0011084    | 442 |
| ALB.resultn   | >= | 3.225       | Hemoglobin.resultn | >= | 14.15       |               |    |         |   | -1.92E-06    | 442 |
| ALB.resultn   | =  | Missing     |                    |    |             |               |    | Missing |   | 0.000507274  | 443 |
| ALB.resultn   | <  | 2.915       |                    |    |             |               |    | Missing |   | 0.005916727  | 443 |
| ALB.resultn   | >= | 2.915       | ALK.times.uln      | =  | Missing     | ALB.resultn   | =  | Missing |   | 0.000681311  | 443 |
| ALB.resultn   | >= | 2.915       | ALK.times.uln      | =  | Missing     | ALB.resultn   | <  | 3.95    |   | 0.002627913  | 443 |
| ALB.resultn   | >= | 2.915       | ALK.times.uln      | =  | Missing     | ALB.resultn   | >= | 3.95    | 0 |              | 443 |

|               |    |             |               |    |             |                    |              |         |              |     |
|---------------|----|-------------|---------------|----|-------------|--------------------|--------------|---------|--------------|-----|
| ALB.resultn   | >= | 2.915       | ALK.times.uln | <  | 5.446215139 | Missing            | 0.000175865  | 443     |              |     |
| ALB.resultn   | >= | 2.915       | ALK.times.uln | >= | 5.446215139 | Missing            | 0.002100855  | 443     |              |     |
| psc.yrs.dur   | =  | Missing     |               |    |             | Missing            | -0.008344322 | 444     |              |     |
| psc.yrs.dur   | <  | 0.839151266 |               |    |             | Missing            | -0.009068403 | 444     |              |     |
| psc.yrs.dur   | >= | 0.839151266 | age.yrs       | =  | Missing     | Missing            | -0.0072653   | 444     |              |     |
| psc.yrs.dur   | >= | 0.839151266 | age.yrs       | <  | 51.64818617 | Missing            | -0.00846629  | 444     |              |     |
| psc.yrs.dur   | >= | 0.839151266 | age.yrs       | >= | 51.64818617 | AST.resultn        | =            | Missing | -0.004514645 | 444 |
| psc.yrs.dur   | >= | 0.839151266 | age.yrs       | >= | 51.64818617 | AST.resultn        | <            | 58.5    | -0.009330267 | 444 |
| psc.yrs.dur   | >= | 0.839151266 | age.yrs       | >= | 51.64818617 | AST.resultn        | >=           | 58.5    | 0            | 444 |
| TBILL.resultn | =  | Missing     |               |    |             |                    |              |         | -0.000238932 | 445 |
| TBILL.resultn | <  | 1.95        | AST.resultn   | =  | Missing     |                    |              |         | -0.000425984 | 445 |
| TBILL.resultn | <  | 1.95        | AST.resultn   | <  | 44          |                    |              |         | -0.001021393 | 445 |
| TBILL.resultn | <  | 1.95        | AST.resultn   | >= | 44          |                    |              |         | 0            | 445 |
| TBILL.resultn | >= | 1.95        | age.yrs       | =  | Missing     |                    |              |         | 0.001964854  | 445 |
| TBILL.resultn | >= | 1.95        | age.yrs       | <  | 48.64476386 |                    |              |         | -0.00035256  | 445 |
| TBILL.resultn | >= | 1.95        | age.yrs       | >= | 48.64476386 |                    |              |         | 0.00474575   | 445 |
| TBILL.resultn | =  | Missing     |               |    |             |                    |              |         | 0.002101024  | 446 |
| TBILL.resultn | <  | 1.95        | PLT.resultn   | =  | Missing     |                    |              |         | 0            | 446 |
| TBILL.resultn | <  | 1.95        | PLT.resultn   | <  | 249.5       |                    |              |         | 0.001327142  | 446 |
| TBILL.resultn | <  | 1.95        | PLT.resultn   | >= | 249.5       |                    |              |         | -4.37E-07    | 446 |
| TBILL.resultn | >= | 1.95        | age.yrs       | =  | Missing     |                    |              |         | 0.001861321  | 446 |
| TBILL.resultn | >= | 1.95        | age.yrs       | <  | 51.10746064 |                    |              |         | 0.000856355  | 446 |
| TBILL.resultn | >= | 1.95        | age.yrs       | >= | 51.10746064 |                    |              |         | 0.003871253  | 446 |
| ALB.resultn   | =  | Missing     |               |    |             |                    |              |         | -0.002912391 | 447 |
| ALB.resultn   | <  | 3.105       |               |    |             | Missing            |              |         | -0.000216558 | 447 |
| ALB.resultn   | >= | 3.105       | TBILL.resultn | =  | Missing     | Missing            |              |         | -0.002837461 | 447 |
| ALB.resultn   | >= | 3.105       | TBILL.resultn | <  | 0.75        | Missing            |              |         | -0.003404213 | 447 |
| ALB.resultn   | >= | 3.105       | TBILL.resultn | >= | 0.75        | Hemoglobin.resultn | =            | Missing | 0            | 447 |
| ALB.resultn   | >= | 3.105       | TBILL.resultn | >= | 0.75        | Hemoglobin.resultn | <            | 15.45   | -0.003239779 | 447 |
| ALB.resultn   | >= | 3.105       | TBILL.resultn | >= | 0.75        | Hemoglobin.resultn | >=           | 15.45   | -0.002571919 | 447 |
| ALK.times.uln | =  | Missing     | ALB.resultn   | =  | Missing     |                    |              |         | -0.002082833 | 448 |
| ALK.times.uln | =  | Missing     | ALB.resultn   | <  | 3.95        |                    |              |         | 0.001180789  | 448 |
| ALK.times.uln | =  | Missing     | ALB.resultn   | >= | 3.95        |                    |              |         | -0.002077879 | 448 |
| ALK.times.uln | <  | 6.02173913  | psc.yrs.dur   | =  | Missing     |                    |              |         | -0.001401364 | 448 |
| ALK.times.uln | <  | 6.02173913  | psc.yrs.dur   | <  | 2           |                    |              |         | -0.001847724 | 448 |
| ALK.times.uln | <  | 6.02173913  | psc.yrs.dur   | >= | 2           |                    |              |         | 0            | 448 |
| ALK.times.uln | >= | 6.02173913  |               |    |             |                    |              |         | 0.001931856  | 448 |
| TBILL.resultn | =  | Missing     |               |    |             | Missing            |              |         | -0.004355429 | 449 |
| TBILL.resultn | <  | 3.4         | age.yrs       | =  | Missing     | Missing            |              |         | -0.003798113 | 449 |
| TBILL.resultn | <  | 3.4         | age.yrs       | <  | 56.0752909  | Missing            |              |         | -0.004139747 | 449 |
| TBILL.resultn | <  | 3.4         | age.yrs       | >= | 56.0752909  | AST.resultn        | =            | Missing | -0.002682969 | 449 |
| TBILL.resultn | <  | 3.4         | age.yrs       | >= | 56.0752909  | AST.resultn        | <            | 54.5    | -0.004359825 | 449 |
| TBILL.resultn | <  | 3.4         | age.yrs       | >= | 56.0752909  | AST.resultn        | >=           | 54.5    | 0            | 449 |
| TBILL.resultn | >= | 3.4         |               |    |             | Missing            |              |         | -0.000656201 | 449 |
| age.yrs       | =  | Missing     |               |    |             | Missing            |              |         | 0.000781748  | 450 |
| age.yrs       | <  | 53.46475017 |               |    |             | Missing            |              |         | 0.000483718  | 450 |
| age.yrs       | >= | 53.46475017 | AST.resultn   | =  | Missing     | Missing            |              |         | 0.00174538   | 450 |
| age.yrs       | >= | 53.46475017 | AST.resultn   | <  | 54.5        | Missing            |              |         | -5.44E-06    | 450 |
| age.yrs       | >= | 53.46475017 | AST.resultn   | >= | 54.5        | PLT.resultn        | =            | Missing | 0.003379477  | 450 |
| age.yrs       | >= | 53.46475017 | AST.resultn   | >= | 54.5        | PLT.resultn        | <            | 251.5   | 0.005256965  | 450 |
| age.yrs       | >= | 53.46475017 | AST.resultn   | >= | 54.5        | PLT.resultn        | >=           | 251.5   | 0            | 450 |
| age.yrs       | =  | Missing     |               |    |             | Missing            |              |         | -8.67E-05    | 451 |
| age.yrs       | <  | 51.58521561 |               |    |             | Missing            |              |         | -0.000685123 | 451 |
| age.yrs       | >= | 51.58521561 | AST.resultn   | =  | Missing     | Missing            |              |         | 0.001397202  | 451 |
| age.yrs       | >= | 51.58521561 | AST.resultn   | <  | 54.5        | Missing            |              |         | -0.000993519 | 451 |
| age.yrs       | >= | 51.58521561 | AST.resultn   | >= | 54.5        | PLT.resultn        | =            | Missing | 0.003719617  | 451 |
| age.yrs       | >= | 51.58521561 | AST.resultn   | >= | 54.5        | PLT.resultn        | <            | 256     | 0.005336841  | 451 |
| age.yrs       | >= | 51.58521561 | AST.resultn   | >= | 54.5        | PLT.resultn        | >=           | 256     | 0            | 451 |
| TBILL.resultn | =  | Missing     |               |    |             | Missing            |              |         | -0.006829259 | 452 |
| TBILL.resultn | <  | 1.25        |               |    |             | Missing            |              |         | -0.007937475 | 452 |
| TBILL.resultn | >= | 1.25        | age.yrs       | =  | Missing     | Missing            |              |         | -0.00588164  | 452 |
| TBILL.resultn | >= | 1.25        | age.yrs       | <  | 51.51813826 | Missing            |              |         | -0.007305451 | 452 |

|               |    |                           |    |                          |    |            |              |       |
|---------------|----|---------------------------|----|--------------------------|----|------------|--------------|-------|
| TBILL.resultn | >= | 1.25 age.yrs              | >= | 51.51813826 psc.yrs.dur  | =  | Missing    | -0.002962827 | 452   |
| TBILL.resultn | >= | 1.25 age.yrs              | >= | 51.51813826 psc.yrs.dur  | <  | 2.45174538 | -0.005925654 | 452   |
| TBILL.resultn | >= | 1.25 age.yrs              | >= | 51.51813826 psc.yrs.dur  | >= | 2.45174538 |              | 0 452 |
| ALK.times.uln | =  | Missing TBILL.resultn     | =  | Missing                  |    |            | -0.001397582 | 453   |
| ALK.times.uln | =  | Missing TBILL.resultn     | <  | 1.2                      |    |            | -0.001159107 | 453   |
| ALK.times.uln | =  | Missing TBILL.resultn     | >= | 1.2                      |    |            | 0.001768342  | 453   |
| ALK.times.uln | <  | 6.02 PLT.resultn          | =  | Missing                  |    |            |              | 0 453 |
| ALK.times.uln | <  | 6.02 PLT.resultn          | <  | 194.5                    |    |            | 0.001619712  | 453   |
| ALK.times.uln | <  | 6.02 PLT.resultn          | >= | 194.5                    |    |            | -0.001060092 | 453   |
| ALK.times.uln | >= | 6.02                      |    |                          |    |            | 0.001337892  | 453   |
| TBILL.resultn | =  | Missing                   |    |                          |    |            | -0.001461377 | 454   |
| TBILL.resultn | <  | 2.35 age.yrs              | =  | Missing                  |    |            | -0.001744061 | 454   |
| TBILL.resultn | <  | 2.35 age.yrs              | <  | 55.80971937              |    |            | -0.002170167 | 454   |
| TBILL.resultn | <  | 2.35 age.yrs              | >= | 55.80971937              |    |            |              | 0 454 |
| TBILL.resultn | >= | 2.35 PLT.resultn          | =  | Missing                  |    |            | 0.000831504  | 454   |
| TBILL.resultn | >= | 2.35 PLT.resultn          | <  | 214.5                    |    |            | 0.003150993  | 454   |
| TBILL.resultn | >= | 2.35 PLT.resultn          | >= | 214.5                    |    |            | -0.000825274 | 454   |
| TBILL.resultn | =  | Missing                   |    |                          |    |            | 0.001532431  | 455   |
| TBILL.resultn | <  | 1.55 Sodium.resultn       | =  | Missing                  |    |            |              | 0 455 |
| TBILL.resultn | <  | 1.55 Sodium.resultn       | <  | 142.5                    |    |            | 0.000276996  | 455   |
| TBILL.resultn | <  | 1.55 Sodium.resultn       | >= | 142.5                    |    |            | 0.003051518  | 455   |
| TBILL.resultn | >= | 1.55 age.yrs              | =  | Missing                  |    |            | 0.002142125  | 455   |
| TBILL.resultn | >= | 1.55 age.yrs              | <  | 50.95003422              |    |            | 0.000811011  | 455   |
| TBILL.resultn | >= | 1.55 age.yrs              | >= | 50.95003422              |    |            | 0.004360647  | 455   |
| ALB.resultn   | =  | Missing                   |    |                          |    | Missing    | 0.000749255  | 456   |
| ALB.resultn   | <  | 3.105                     |    |                          |    | Missing    | 0.003303557  | 456   |
| ALB.resultn   | >= | 3.105 PLT.resultn         | =  | Missing                  |    | Missing    | 0.000522587  | 456   |
| ALB.resultn   | >= | 3.105 PLT.resultn         | <  | 209.5 Hemoglobin.resultn | =  | Missing    | 0.001444517  | 456   |
| ALB.resultn   | >= | 3.105 PLT.resultn         | <  | 209.5 Hemoglobin.resultn | <  | 14.1       | 0.004044647  | 456   |
| ALB.resultn   | >= | 3.105 PLT.resultn         | <  | 209.5 Hemoglobin.resultn | >= | 14.1       |              | 0 456 |
| ALB.resultn   | >= | 3.105 PLT.resultn         | >= | 209.5                    |    | Missing    | 0.000509334  | 456   |
| ALB.resultn   | =  | Missing                   |    |                          |    |            | -0.001574037 | 457   |
| ALB.resultn   | <  | 3.31 PLT.resultn          | =  | Missing                  |    |            | 0.001302726  | 457   |
| ALB.resultn   | <  | 3.31 PLT.resultn          | <  | 249.5                    |    |            | 0.004465225  | 457   |
| ALB.resultn   | <  | 3.31 PLT.resultn          | >= | 249.5                    |    |            | -0.000805606 | 457   |
| ALB.resultn   | >= | 3.31 TBILL.resultn        | =  | Missing                  |    |            | -0.000984717 | 457   |
| ALB.resultn   | >= | 3.31 TBILL.resultn        | <  | 1.05                     |    |            | -0.001407729 | 457   |
| ALB.resultn   | >= | 3.31 TBILL.resultn        | >= | 1.05                     |    |            |              | 0 457 |
| ALK.times.uln | =  | Missing TBILL.resultn     | =  | Missing                  |    |            | -0.001325132 | 458   |
| ALK.times.uln | =  | Missing TBILL.resultn     | <  | 1.15                     |    |            | -0.00090893  | 458   |
| ALK.times.uln | =  | Missing TBILL.resultn     | >= | 1.15                     |    |            | 0.001994947  | 458   |
| ALK.times.uln | <  | 5.462893197 PLT.resultn   | =  | Missing                  |    |            |              | 0 458 |
| ALK.times.uln | <  | 5.462893197 PLT.resultn   | <  | 185.5                    |    |            | 0.002362026  | 458   |
| ALK.times.uln | <  | 5.462893197 PLT.resultn   | >= | 185.5                    |    |            | -0.00111473  | 458   |
| ALK.times.uln | >= | 5.462893197               |    |                          |    |            | 0.002053992  | 458   |
| ALK.times.uln | =  | Missing ALB.resultn       | =  | Missing                  |    |            | -0.002353571 | 459   |
| ALK.times.uln | =  | Missing ALB.resultn       | <  | 3.55                     |    |            | 0.00138222   | 459   |
| ALK.times.uln | =  | Missing ALB.resultn       | >= | 3.55                     |    |            | -0.0019891   | 459   |
| ALK.times.uln | <  | 5.446215139 TBILL.resultn | =  | Missing                  |    |            | -0.001926333 | 459   |
| ALK.times.uln | <  | 5.446215139 TBILL.resultn | <  | 2.75                     |    |            | -0.002060445 | 459   |
| ALK.times.uln | <  | 5.446215139 TBILL.resultn | >= | 2.75                     |    |            |              | 0 459 |
| ALK.times.uln | >= | 5.446215139               |    |                          |    |            | 0.000166172  | 459   |
| TBILL.resultn | =  | Missing                   |    |                          |    |            | 0.000344562  | 460   |
| TBILL.resultn | <  | 2.05 age.yrs              | =  | Missing                  |    |            | -0.000919986 | 460   |
| TBILL.resultn | <  | 2.05 age.yrs              | <  | 53.56057495              |    |            | -0.001335871 | 460   |
| TBILL.resultn | <  | 2.05 age.yrs              | >= | 53.56057495              |    |            |              | 0 460 |
| TBILL.resultn | >= | 2.05 PLT.resultn          | =  | Missing                  |    |            | 0.00115507   | 460   |
| TBILL.resultn | >= | 2.05 PLT.resultn          | <  | 209                      |    |            | 0.00253863   | 460   |
| TBILL.resultn | >= | 2.05 PLT.resultn          | >= | 209                      |    |            | 0.000290344  | 460   |
| TBILL.resultn | =  | Missing                   |    |                          |    |            | 0.001110329  | 461   |
| TBILL.resultn | <  | 1.9 Sodium.resultn        | =  | Missing                  |    |            |              | 0 461 |
| TBILL.resultn | <  | 1.9 Sodium.resultn        | <  | 136.5                    |    |            | 0.003027774  | 461   |

|               |    |                         |    |                                |         |              |              |     |
|---------------|----|-------------------------|----|--------------------------------|---------|--------------|--------------|-----|
| TBILL.resultn | <  | 1.9 Sodium.resultn      | >= | 136.5                          |         | 0.000891415  | 461          |     |
| TBILL.resultn | >= | 1.9 Hemoglobin.resultn  | =  | Missing                        |         | 0.001600394  | 461          |     |
| TBILL.resultn | >= | 1.9 Hemoglobin.resultn  | <  | 12.75                          |         | 0.003514485  | 461          |     |
| TBILL.resultn | >= | 1.9 Hemoglobin.resultn  | >= | 12.75                          |         | 5.32E-06     | 461          |     |
| TBILL.resultn | =  | Missing                 |    |                                | Missing | 0.002001211  | 462          |     |
| TBILL.resultn | <  | 1.55                    |    |                                | Missing | 0.000382098  | 462          |     |
| TBILL.resultn | >= | 1.55 ALB.resultn        | =  | Missing                        | Missing | 0.001931668  | 462          |     |
| TBILL.resultn | >= | 1.55 ALB.resultn        | <  | 3.35                           | Missing | 0.003399426  | 462          |     |
| TBILL.resultn | >= | 1.55 ALB.resultn        | >= | 3.35 PLT.resultn               | =       | Missing      | 0.001388054  | 462 |
| TBILL.resultn | >= | 1.55 ALB.resultn        | >= | 3.35 PLT.resultn               | <       | 247.5        | 0.002562562  | 462 |
| TBILL.resultn | >= | 1.55 ALB.resultn        | >= | 3.35 PLT.resultn               | >=      | 247.5        | 0            | 462 |
| ALK.times.uln | =  | Missing                 |    |                                | Missing | 0.000684296  | 463          |     |
| ALK.times.uln | <  | 3.864888273             |    |                                | Missing | 0.000391609  | 463          |     |
| ALK.times.uln | >= | 3.864888273 age.yrs     | =  | Missing                        | Missing | 0.002423256  | 463          |     |
| ALK.times.uln | >= | 3.864888273 age.yrs     | <  | 45.51813826 Hemoglobin.resultn | =       | Missing      | 0.00132011   | 463 |
| ALK.times.uln | >= | 3.864888273 age.yrs     | <  | 45.51813826 Hemoglobin.resultn | <       | 12.8         | 0.003036254  | 463 |
| ALK.times.uln | >= | 3.864888273 age.yrs     | <  | 45.51813826 Hemoglobin.resultn | >=      | 12.8         | 0            | 463 |
| ALK.times.uln | >= | 3.864888273 age.yrs     | >= | 45.51813826                    | Missing | 0.004314363  | 463          |     |
| ALK.times.uln | =  | Missing TBILL.resultn   | =  | Missing                        |         | 4.92E-05     | 464          |     |
| ALK.times.uln | =  | Missing TBILL.resultn   | <  | 0.95                           |         | 2.22E-05     | 464          |     |
| ALK.times.uln | =  | Missing TBILL.resultn   | >= | 0.95                           |         | 0.005250482  | 464          |     |
| ALK.times.uln | <  | 7.291304348 PLT.resultn | =  | Missing                        |         | 0            | 464          |     |
| ALK.times.uln | <  | 7.291304348 PLT.resultn | <  | 185.5                          |         | 0.002782948  | 464          |     |
| ALK.times.uln | <  | 7.291304348 PLT.resultn | >= | 185.5                          |         | 0.000331372  | 464          |     |
| ALK.times.uln | >= | 7.291304348             |    |                                |         | 0.003444054  | 464          |     |
| ALK.times.uln | =  | Missing TBILL.resultn   | =  | Missing                        |         | 0.000324406  | 465          |     |
| ALK.times.uln | =  | Missing TBILL.resultn   | <  | 0.95                           |         | -0.000872124 | 465          |     |
| ALK.times.uln | =  | Missing TBILL.resultn   | >= | 0.95                           |         | 0.002654491  | 465          |     |
| ALK.times.uln | <  | 6.02 ALB.resultn        | =  | Missing                        |         | 0            | 465          |     |
| ALK.times.uln | <  | 6.02 ALB.resultn        | <  | 3.31                           |         | 0.00273253   | 465          |     |
| ALK.times.uln | <  | 6.02 ALB.resultn        | >= | 3.31                           |         | -0.000621269 | 465          |     |
| ALK.times.uln | >= | 6.02                    |    |                                |         | 0.002786584  | 465          |     |
| ALB.resultn   | =  | Missing                 |    |                                | Missing | -6.13E-05    | 466          |     |
| ALB.resultn   | <  | 2.95                    |    |                                | Missing | 0.002902765  | 466          |     |
| ALB.resultn   | >= | 2.95 Sodium.resultn     | =  | Missing                        | Missing | -0.000934427 | 466          |     |
| ALB.resultn   | >= | 2.95 Sodium.resultn     | <  | 136.5                          | Missing | 0.002183684  | 466          |     |
| ALB.resultn   | >= | 2.95 Sodium.resultn     | >= | 136.5 TBILL.resultn            | =       | Missing      | -0.000883663 | 466 |
| ALB.resultn   | >= | 2.95 Sodium.resultn     | >= | 136.5 TBILL.resultn            | <       | 1.65         | -0.00103094  | 466 |
| ALB.resultn   | >= | 2.95 Sodium.resultn     | >= | 136.5 TBILL.resultn            | >=      | 1.65         | 0            | 466 |
| TBILL.resultn | =  | Missing                 |    |                                | Missing | 0.001399614  | 467          |     |
| TBILL.resultn | <  | 1.65                    |    |                                | Missing | 0.000554872  | 467          |     |
| TBILL.resultn | >= | 1.65 PLT.resultn        | =  | Missing                        | Missing | 0.001513518  | 467          |     |
| TBILL.resultn | >= | 1.65 PLT.resultn        | <  | 217                            | Missing | 0.004227924  | 467          |     |
| TBILL.resultn | >= | 1.65 PLT.resultn        | >= | 217 Hemoglobin.resultn         | =       | Missing      | 0.000307116  | 467 |
| TBILL.resultn | >= | 1.65 PLT.resultn        | >= | 217 Hemoglobin.resultn         | <       | 12.95        | 0.00072591   | 467 |
| TBILL.resultn | >= | 1.65 PLT.resultn        | >= | 217 Hemoglobin.resultn         | >=      | 12.95        | 0            | 467 |
| ALB.resultn   | =  | Missing                 |    |                                | Missing | -0.001944626 | 468          |     |
| ALB.resultn   | <  | 2.915                   |    |                                | Missing | 0.003923328  | 468          |     |
| ALB.resultn   | >= | 2.915 TBILL.resultn     | =  | Missing                        | Missing | -0.001792552 | 468          |     |
| ALB.resultn   | >= | 2.915 TBILL.resultn     | <  | 0.75                           | Missing | -0.00248263  | 468          |     |
| ALB.resultn   | >= | 2.915 TBILL.resultn     | >= | 0.75 age.yrs                   | =       | Missing      | -0.001102473 | 468 |
| ALB.resultn   | >= | 2.915 TBILL.resultn     | >= | 0.75 age.yrs                   | <       | 51.76180698  | -0.001837455 | 468 |
| ALB.resultn   | >= | 2.915 TBILL.resultn     | >= | 0.75 age.yrs                   | >=      | 51.76180698  | 0            | 468 |
| ALB.resultn   | =  | Missing                 |    |                                | Missing | -0.000684966 | 469          |     |
| ALB.resultn   | <  | 2.915                   |    |                                | Missing | 0.003036267  | 469          |     |
| ALB.resultn   | >= | 2.915 PLT.resultn       | =  | Missing                        | Missing | -0.00020763  | 469          |     |
| ALB.resultn   | >= | 2.915 PLT.resultn       | <  | 198.5 ALB.resultn              | =       | Missing      | 0.001995224  | 469 |
| ALB.resultn   | >= | 2.915 PLT.resultn       | <  | 198.5 ALB.resultn              | <       | 4.05         | 0.00498806   | 469 |
| ALB.resultn   | >= | 2.915 PLT.resultn       | <  | 198.5 ALB.resultn              | >=      | 4.05         | 0            | 469 |
| ALB.resultn   | >= | 2.915 PLT.resultn       | >= | 198.5                          | Missing | -0.001232255 | 469          |     |
| age.yrs       | =  | Missing                 |    |                                | Missing | -0.005604238 | 470          |     |
| age.yrs       | <  | 49.41957563             |    |                                | Missing | -0.006290788 | 470          |     |

|               |    |             |                    |    |             |                |              |              |              |     |
|---------------|----|-------------|--------------------|----|-------------|----------------|--------------|--------------|--------------|-----|
| age.yrs       | >= | 49.41957563 | AST.resultn        | =  | Missing     | Missing        | -0.004374482 | 470          |              |     |
| age.yrs       | >= | 49.41957563 | AST.resultn        | <  | 51.5        | Missing        | -0.006402863 | 470          |              |     |
| age.yrs       | >= | 49.41957563 | AST.resultn        | >= | 51.5        | psc.yrs.dur    | =            | Missing      | -0.002298929 | 470 |
| age.yrs       | >= | 49.41957563 | AST.resultn        | >= | 51.5        | psc.yrs.dur    | <            | 0.465434634  | -0.005491885 | 470 |
| age.yrs       | >= | 49.41957563 | AST.resultn        | >= | 51.5        | psc.yrs.dur    | >=           | 0.465434634  | 0            | 470 |
| TBILL.resultn | =  | Missing     |                    |    |             |                |              | 0.000993083  | 471          |     |
| TBILL.resultn | <  | 2.45        | ALB.resultn        | =  | Missing     |                |              | 0            | 471          |     |
| TBILL.resultn | <  | 2.45        | ALB.resultn        | <  | 3.225       |                |              | 0.002889733  | 471          |     |
| TBILL.resultn | <  | 2.45        | ALB.resultn        | >= | 3.225       |                |              | 0.000395451  | 471          |     |
| TBILL.resultn | >= | 2.45        | psc.yrs.dur        | =  | Missing     |                |              | 0.002832489  | 471          |     |
| TBILL.resultn | >= | 2.45        | psc.yrs.dur        | <  | 2.136892539 |                |              | 0.001868078  | 471          |     |
| TBILL.resultn | >= | 2.45        | psc.yrs.dur        | >= | 2.136892539 |                |              | 0.003709226  | 471          |     |
| TBILL.resultn | =  | Missing     |                    |    |             |                |              | 0.001135094  | 472          |     |
| TBILL.resultn | <  | 2.05        | Sodium.resultn     | =  | Missing     |                |              | 0            | 472          |     |
| TBILL.resultn | <  | 2.05        | Sodium.resultn     | <  | 137.5       |                |              | 0.001908949  | 472          |     |
| TBILL.resultn | <  | 2.05        | Sodium.resultn     | >= | 137.5       |                |              | 0.000557969  | 472          |     |
| TBILL.resultn | >= | 2.05        | age.yrs            | =  | Missing     |                |              | 0.002829428  | 472          |     |
| TBILL.resultn | >= | 2.05        | age.yrs            | <  | 46.21081451 |                |              | 0.001352304  | 472          |     |
| TBILL.resultn | >= | 2.05        | age.yrs            | >= | 46.21081451 |                |              | 0.005192825  | 472          |     |
| ALB.resultn   | =  | Missing     |                    |    |             |                |              | -0.0006396   | 473          |     |
| ALB.resultn   | <  | 3.31        | age.yrs            | =  | Missing     |                |              | 0.0015003    | 473          |     |
| ALB.resultn   | <  | 3.31        | age.yrs            | <  | 50.58590007 |                |              | 0.000131163  | 473          |     |
| ALB.resultn   | <  | 3.31        | age.yrs            | >= | 50.58590007 |                |              | 0.003367305  | 473          |     |
| ALB.resultn   | >= | 3.31        | TBILL.resultn      | =  | Missing     |                |              | -0.000775315 | 473          |     |
| ALB.resultn   | >= | 3.31        | TBILL.resultn      | <  | 0.85        |                |              | -0.001248068 | 473          |     |
| ALB.resultn   | >= | 3.31        | TBILL.resultn      | >= | 0.85        |                |              | 0            | 473          |     |
| age.yrs       | =  | Missing     |                    |    |             | Missing        |              | 0.000873947  | 474          |     |
| age.yrs       | <  | 54.36824093 |                    |    |             | Missing        |              | 0.000289567  | 474          |     |
| age.yrs       | >= | 54.36824093 | TBILL.resultn      | =  | Missing     | Missing        |              | 0.002440764  | 474          |     |
| age.yrs       | >= | 54.36824093 | TBILL.resultn      | <  | 1.55        | Sodium.resultn | =            | Missing      | 0            | 474 |
| age.yrs       | >= | 54.36824093 | TBILL.resultn      | <  | 1.55        | Sodium.resultn | <            | 138.5        | 0.003448819  | 474 |
| age.yrs       | >= | 54.36824093 | TBILL.resultn      | <  | 1.55        | Sodium.resultn | >=           | 138.5        | 0.000823587  | 474 |
| age.yrs       | >= | 54.36824093 | TBILL.resultn      | >= | 1.55        |                | Missing      |              | 0.007918914  | 474 |
| ALB.resultn   | =  | Missing     |                    |    |             |                |              | -0.000721347 | 475          |     |
| ALB.resultn   | <  | 3.31        | TBILL.resultn      | =  | Missing     |                |              | 0.000520532  | 475          |     |
| ALB.resultn   | <  | 3.31        | TBILL.resultn      | <  | 1.31        |                |              | -0.000454753 | 475          |     |
| ALB.resultn   | <  | 3.31        | TBILL.resultn      | >= | 1.31        |                |              | 0.001983458  | 475          |     |
| ALB.resultn   | >= | 3.31        | Hemoglobin.resultn | =  | Missing     |                |              | 0            | 475          |     |
| ALB.resultn   | >= | 3.31        | Hemoglobin.resultn | <  | 13.75       |                |              | -0.000727138 | 475          |     |
| ALB.resultn   | >= | 3.31        | Hemoglobin.resultn | >= | 13.75       |                |              | -0.001390204 | 475          |     |
| TBILL.resultn | =  | Missing     |                    |    |             | Missing        |              | -0.003675187 | 476          |     |
| TBILL.resultn | <  | 3.5         | TBILL.resultn      | =  | Missing     | Missing        |              | -0.003862087 | 476          |     |
| TBILL.resultn | <  | 3.5         | TBILL.resultn      | <  | 2           | age.yrs        | =            | Missing      | -0.003983003 | 476 |
| TBILL.resultn | <  | 3.5         | TBILL.resultn      | <  | 2           | age.yrs        | <            | 70.37645448  | -0.004184165 | 476 |
| TBILL.resultn | <  | 3.5         | TBILL.resultn      | <  | 2           | age.yrs        | >=           | 70.37645448  | 0            | 476 |
| TBILL.resultn | <  | 3.5         | TBILL.resultn      | >= | 2           |                | Missing      |              | -0.002464831 | 476 |
| TBILL.resultn | >= | 3.5         |                    |    |             | Missing        |              | -0.00182753  | 476          |     |
| ALK.times.uln | =  | Missing     | TBILL.resultn      | =  | Missing     |                |              | -0.000364319 | 477          |     |
| ALK.times.uln | =  | Missing     | TBILL.resultn      | <  | 1.15        |                |              | -0.000367437 | 477          |     |
| ALK.times.uln | =  | Missing     | TBILL.resultn      | >= | 1.15        |                |              | 0.002626403  | 477          |     |
| ALK.times.uln | <  | 6.02        | Sodium.resultn     | =  | Missing     |                |              | 0            | 477          |     |
| ALK.times.uln | <  | 6.02        | Sodium.resultn     | <  | 137.5       |                |              | 0.002161595  | 477          |     |
| ALK.times.uln | <  | 6.02        | Sodium.resultn     | >= | 137.5       |                |              | -0.000213263 | 477          |     |
| ALK.times.uln | >= | 6.02        |                    |    |             |                |              | 0.002722011  | 477          |     |
| ALK.times.uln | =  | Missing     | ALB.resultn        | =  | Missing     |                |              | -0.000878226 | 478          |     |
| ALK.times.uln | =  | Missing     | ALB.resultn        | <  | 3.95        |                |              | 0.002233041  | 478          |     |
| ALK.times.uln | =  | Missing     | ALB.resultn        | >= | 3.95        |                |              | -0.0005522   | 478          |     |
| ALK.times.uln | <  | 5.857962963 | TBILL.resultn      | =  | Missing     |                |              | -0.000331263 | 478          |     |
| ALK.times.uln | <  | 5.857962963 | TBILL.resultn      | <  | 0.65        |                |              | -0.000888625 | 478          |     |
| ALK.times.uln | <  | 5.857962963 | TBILL.resultn      | >= | 0.65        |                |              | 0            | 478          |     |
| ALK.times.uln | >= | 5.857962963 |                    |    |             |                |              | 0.001694645  | 478          |     |
| ALB.resultn   | =  | Missing     |                    |    |             | Missing        |              | -0.004999031 | 479          |     |

|               |    |                          |    |                          |    |             |              |     |
|---------------|----|--------------------------|----|--------------------------|----|-------------|--------------|-----|
| ALB.resultn   | <  | 3.225                    |    |                          |    | Missing     | -0.002728609 | 479 |
| ALB.resultn   | >= | 3.225 Sodium.resultn     | =  | Missing                  |    | Missing     | -0.004988274 | 479 |
| ALB.resultn   | >= | 3.225 Sodium.resultn     | <  | 138.5 psc.yrs.dur        | =  | Missing     | -0.003131384 | 479 |
| ALB.resultn   | >= | 3.225 Sodium.resultn     | <  | 138.5 psc.yrs.dur        | <  | 1.890485969 | -0.004884959 | 479 |
| ALB.resultn   | >= | 3.225 Sodium.resultn     | <  | 138.5 psc.yrs.dur        | >= | 1.890485969 | 0            | 479 |
| ALB.resultn   | >= | 3.225 Sodium.resultn     | >= | 138.5                    |    | Missing     | -0.004954055 | 479 |
| psc.yrs.dur   | =  | Missing                  |    |                          |    | Missing     | -0.004253618 | 480 |
| psc.yrs.dur   | <  | 2.05065024               |    |                          |    | Missing     | -0.004813524 | 480 |
| psc.yrs.dur   | >= | 2.05065024 ALK.times.uln | =  | Missing                  |    | Missing     | -0.003487887 | 480 |
| psc.yrs.dur   | >= | 2.05065024 ALK.times.uln | <  | 3.173513753 age.yrs      | =  | Missing     | -0.003872198 | 480 |
| psc.yrs.dur   | >= | 2.05065024 ALK.times.uln | <  | 3.173513753 age.yrs      | <  | 56.79671458 | -0.005207439 | 480 |
| psc.yrs.dur   | >= | 2.05065024 ALK.times.uln | <  | 3.173513753 age.yrs      | >= | 56.79671458 | 0            | 480 |
| psc.yrs.dur   | >= | 2.05065024 ALK.times.uln | >= | 3.173513753              |    | Missing     | 0.000639358  | 480 |
| TBILL.resultn | =  | Missing                  |    |                          |    |             | -0.001227231 | 481 |
| TBILL.resultn | <  | 1.95 age.yrs             | =  | Missing                  |    |             | -0.001405705 | 481 |
| TBILL.resultn | <  | 1.95 age.yrs             | <  | 55.80971937              |    |             | -0.001862559 | 481 |
| TBILL.resultn | <  | 1.95 age.yrs             | >= | 55.80971937              |    |             | 0            | 481 |
| TBILL.resultn | >= | 1.95 psc.yrs.dur         | =  | Missing                  |    |             | 0.000278001  | 481 |
| TBILL.resultn | >= | 1.95 psc.yrs.dur         | <  | 0.851471595              |    |             | -0.001305287 | 481 |
| TBILL.resultn | >= | 1.95 psc.yrs.dur         | >= | 0.851471595              |    |             | 0.001564422  | 481 |
| TBILL.resultn | =  | Missing                  |    |                          |    |             | 0.001076721  | 482 |
| TBILL.resultn | <  | 1.65 ALK.times.uln       | =  | Missing                  |    |             | 0            | 482 |
| TBILL.resultn | <  | 1.65 ALK.times.uln       | <  | 5.340833404              |    |             | -0.000531902 | 482 |
| TBILL.resultn | <  | 1.65 ALK.times.uln       | >= | 5.340833404              |    |             | 0.001176639  | 482 |
| TBILL.resultn | >= | 1.65 Hemoglobin.resultn  | =  | Missing                  |    |             | 0.005437417  | 482 |
| TBILL.resultn | >= | 1.65 Hemoglobin.resultn  | <  | 12.5                     |    |             | 0.000898844  | 482 |
| TBILL.resultn | >= | 1.65 Hemoglobin.resultn  | >= | 12.5                     |    |             | -0.000231749 | 482 |
| ALB.resultn   | =  | Missing                  |    |                          |    | Missing     | 0.000622742  | 483 |
| ALB.resultn   | <  | 2.965                    |    |                          |    | Missing     | 0.003666837  | 483 |
| ALB.resultn   | >= | 2.965 PLT.resultn        | =  | Missing                  |    | Missing     | 0.000696825  | 483 |
| ALB.resultn   | >= | 2.965 PLT.resultn        | <  | 209.5 Hemoglobin.resultn | =  | Missing     | 0.001166019  | 483 |
| ALB.resultn   | >= | 2.965 PLT.resultn        | <  | 209.5 Hemoglobin.resultn | <  | 14.1        | 0.003498056  | 483 |
| ALB.resultn   | >= | 2.965 PLT.resultn        | <  | 209.5 Hemoglobin.resultn | >= | 14.1        | 0            | 483 |
| ALB.resultn   | >= | 2.965 PLT.resultn        | >= | 209.5                    |    | Missing     | 0.000608602  | 483 |
| TBILL.resultn | =  | Missing                  |    |                          |    |             | -0.00087038  | 484 |
| TBILL.resultn | <  | 2.05 ALB.resultn         | =  | Missing                  |    |             | 0            | 484 |
| TBILL.resultn | <  | 2.05 ALB.resultn         | <  | 4.25                     |    |             | -0.001518072 | 484 |
| TBILL.resultn | <  | 2.05 ALB.resultn         | >= | 4.25                     |    |             | -0.000207653 | 484 |
| TBILL.resultn | >= | 2.05 PLT.resultn         | =  | Missing                  |    |             | 0.000507207  | 484 |
| TBILL.resultn | >= | 2.05 PLT.resultn         | <  | 237.5                    |    |             | 0.001754135  | 484 |
| TBILL.resultn | >= | 2.05 PLT.resultn         | >= | 237.5                    |    |             | -0.00073972  | 484 |
| age.yrs       | =  | Missing                  |    |                          |    | Missing     | -0.004238675 | 485 |
| age.yrs       | <  | 51.53319644              |    |                          |    | Missing     | -0.004733526 | 485 |
| age.yrs       | >= | 51.53319644 AST.resultn  | =  | Missing                  |    | Missing     | -0.003142485 | 485 |
| age.yrs       | >= | 51.53319644 AST.resultn  | <  | 51.5                     |    | Missing     | -0.005042254 | 485 |
| age.yrs       | >= | 51.53319644 AST.resultn  | >= | 51.5 psc.yrs.dur         | =  | Missing     | -0.001520732 | 485 |
| age.yrs       | >= | 51.53319644 AST.resultn  | >= | 51.5 psc.yrs.dur         | <  | 0.476386037 | -0.003463889 | 485 |
| age.yrs       | >= | 51.53319644 AST.resultn  | >= | 51.5 psc.yrs.dur         | >= | 0.476386037 | 0            | 485 |
| ALB.resultn   | =  | Missing                  |    |                          |    | Missing     | -0.004356313 | 486 |
| ALB.resultn   | <  | 2.95                     |    |                          |    | Missing     | -0.000312317 | 486 |
| ALB.resultn   | >= | 2.95 psc.yrs.dur         | =  | Missing                  |    | Missing     | -0.003978605 | 486 |
| ALB.resultn   | >= | 2.95 psc.yrs.dur         | <  | 6.410677618              |    | Missing     | -0.004307807 | 486 |
| ALB.resultn   | >= | 2.95 psc.yrs.dur         | >= | 6.410677618 AST.resultn  | =  | Missing     | -0.002235771 | 486 |
| ALB.resultn   | >= | 2.95 psc.yrs.dur         | >= | 6.410677618 AST.resultn  | <  | 44.5        | -0.004751014 | 486 |
| ALB.resultn   | >= | 2.95 psc.yrs.dur         | >= | 6.410677618 AST.resultn  | >= | 44.5        | 0            | 486 |
| ALB.resultn   | =  | Missing                  |    |                          |    | Missing     | -0.003415883 | 487 |
| ALB.resultn   | <  | 2.915                    |    |                          |    | Missing     | -3.47E-05    | 487 |
| ALB.resultn   | >= | 2.915 TBILL.resultn      | =  | Missing                  |    | Missing     | -0.00301749  | 487 |
| ALB.resultn   | >= | 2.915 TBILL.resultn      | <  | 0.85                     |    | Missing     | -0.003768902 | 487 |
| ALB.resultn   | >= | 2.915 TBILL.resultn      | >= | 0.85 Hemoglobin.resultn  | =  | Missing     | 0            | 487 |
| ALB.resultn   | >= | 2.915 TBILL.resultn      | >= | 0.85 Hemoglobin.resultn  | <  | 13.75       | -0.002181347 | 487 |
| ALB.resultn   | >= | 2.915 TBILL.resultn      | >= | 0.85 Hemoglobin.resultn  | >= | 13.75       | -0.003176181 | 487 |



|               |    |                           |    |                           |         |              |              |     |
|---------------|----|---------------------------|----|---------------------------|---------|--------------|--------------|-----|
| ALB.resultn   | =  | Missing                   |    |                           | Missing | -0.003289386 | 488          |     |
| ALB.resultn   | <  | 2.875                     |    |                           | Missing | 0.000288721  | 488          |     |
| ALB.resultn   | >= | 2.875 psc.yrs.dur         | =  | Missing                   | Missing | -0.003236873 | 488          |     |
| ALB.resultn   | >= | 2.875 psc.yrs.dur         | <  | 6.592744695               | Missing | -0.00340419  | 488          |     |
| ALB.resultn   | >= | 2.875 psc.yrs.dur         | >= | 6.592744695 TBILI.resultn | =       | Missing      | -0.001898336 | 488 |
| ALB.resultn   | >= | 2.875 psc.yrs.dur         | >= | 6.592744695 TBILI.resultn | <       | 1.31         | -0.003796672 | 488 |
| ALB.resultn   | >= | 2.875 psc.yrs.dur         | >= | 6.592744695 TBILI.resultn | >=      | 1.31         | 0            | 488 |
| ALB.resultn   | =  | Missing                   |    |                           |         |              | -0.001545481 | 489 |
| ALB.resultn   | <  | 3.225 TBILI.resultn       | =  | Missing                   |         |              | 0.000565187  | 489 |
| ALB.resultn   | <  | 3.225 TBILI.resultn       | <  | 1.31                      |         |              | -0.000791759 | 489 |
| ALB.resultn   | <  | 3.225 TBILI.resultn       | >= | 1.31                      |         |              | 0.001922134  | 489 |
| ALB.resultn   | >= | 3.225 TBILI.resultn       | =  | Missing                   |         |              | -0.000964804 | 489 |
| ALB.resultn   | >= | 3.225 TBILI.resultn       | <  | 0.95                      |         |              | -0.001436643 | 489 |
| ALB.resultn   | >= | 3.225 TBILI.resultn       | >= | 0.95                      |         |              | 0            | 489 |
| ALB.resultn   | =  | Missing                   |    |                           | Missing | -0.004246239 | 490          |     |
| ALB.resultn   | <  | 2.915                     |    |                           | Missing | 0.000240956  | 490          |     |
| ALB.resultn   | >= | 2.915 TBILI.resultn       | =  | Missing                   | Missing | -0.003583989 | 490          |     |
| ALB.resultn   | >= | 2.915 TBILI.resultn       | <  | 0.85                      | Missing | -0.004273521 | 490          |     |
| ALB.resultn   | >= | 2.915 TBILI.resultn       | >= | 0.85 Hemoglobin.resultn   | =       | Missing      | 0            | 490 |
| ALB.resultn   | >= | 2.915 TBILI.resultn       | >= | 0.85 Hemoglobin.resultn   | <       | 13.75        | -0.002563508 | 490 |
| ALB.resultn   | >= | 2.915 TBILI.resultn       | >= | 0.85 Hemoglobin.resultn   | >=      | 13.75        | -0.003811622 | 490 |
| ALK.times.uln | =  | Missing TBILI.resultn     | =  | Missing                   |         |              | -0.003000586 | 491 |
| ALK.times.uln | =  | Missing TBILI.resultn     | <  | 1.15                      |         |              | -0.003977521 | 491 |
| ALK.times.uln | =  | Missing TBILI.resultn     | >= | 1.15                      |         |              | 0            | 491 |
| ALK.times.uln | <  | 5.963877551               |    |                           |         |              | -0.003971148 | 491 |
| ALK.times.uln | >= | 5.963877551 ALK.times.uln | =  | Missing                   |         |              | -0.001454648 | 491 |
| ALK.times.uln | >= | 5.963877551 ALK.times.uln | <  | 7.794978567               |         |              | 0.001101675  | 491 |
| ALK.times.uln | >= | 5.963877551 ALK.times.uln | >= | 7.794978567               |         |              | -0.003584916 | 491 |
| TBILI.resultn | =  | Missing                   |    |                           |         |              | -0.000749605 | 492 |
| TBILI.resultn | <  | 2.4 TBILI.resultn         | =  | Missing                   |         |              | -0.001220124 | 492 |
| TBILI.resultn | <  | 2.4 TBILI.resultn         | <  | 1.25                      |         |              | -0.001453181 | 492 |
| TBILI.resultn | <  | 2.4 TBILI.resultn         | >= | 1.25                      |         |              | 0            | 492 |
| TBILI.resultn | >= | 2.4 PLT.resultn           | =  | Missing                   |         |              | 0.000548246  | 492 |
| TBILI.resultn | >= | 2.4 PLT.resultn           | <  | 249.5                     |         |              | 0.00237441   | 492 |
| TBILI.resultn | >= | 2.4 PLT.resultn           | >= | 249.5                     |         |              | -0.001137444 | 492 |
| ALB.resultn   | =  | Missing                   |    |                           | Missing | -0.003961359 | 493          |     |
| ALB.resultn   | <  | 2.965                     |    |                           | Missing | -0.00037522  | 493          |     |
| ALB.resultn   | >= | 2.965 Hemoglobin.resultn  | =  | Missing TBILI.resultn     | =       | Missing      | -0.002614781 | 493 |
| ALB.resultn   | >= | 2.965 Hemoglobin.resultn  | =  | Missing TBILI.resultn     | <       | 1.15         | -0.003704273 | 493 |
| ALB.resultn   | >= | 2.965 Hemoglobin.resultn  | =  | Missing TBILI.resultn     | >=      | 1.15         | 0            | 493 |
| ALB.resultn   | >= | 2.965 Hemoglobin.resultn  | <  | 13.35                     | Missing | -0.003808682 | 493          |     |
| ALB.resultn   | >= | 2.965 Hemoglobin.resultn  | >= | 13.35                     | Missing | -0.00452117  | 493          |     |
| ALB.resultn   | =  | Missing                   |    |                           | Missing | -0.005100332 | 494          |     |
| ALB.resultn   | <  | 2.89                      |    |                           | Missing | -0.002356084 | 494          |     |
| ALB.resultn   | >= | 2.89 TBILI.resultn        | =  | Missing                   | Missing | -0.004802808 | 494          |     |
| ALB.resultn   | >= | 2.89 TBILI.resultn        | <  | 1.31                      | Missing | -0.005127985 | 494          |     |
| ALB.resultn   | >= | 2.89 TBILI.resultn        | >= | 1.31 age.yrs              | =       | Missing      | -0.003509662 | 494 |
| ALB.resultn   | >= | 2.89 TBILI.resultn        | >= | 1.31 age.yrs              | <       | 53.46338125  | -0.004716108 | 494 |
| ALB.resultn   | >= | 2.89 TBILI.resultn        | >= | 1.31 age.yrs              | >=      | 53.46338125  | 0            | 494 |
| TBILI.resultn | =  | Missing                   |    |                           | Missing | 0.001148419  | 495          |     |
| TBILI.resultn | <  | 1.55                      |    |                           | Missing | 0.00048583   | 495          |     |
| TBILI.resultn | >= | 1.55 PLT.resultn          | =  | Missing                   | Missing | 0.001831822  | 495          |     |
| TBILI.resultn | >= | 1.55 PLT.resultn          | <  | 198.5                     | Missing | 0.005321943  | 495          |     |
| TBILI.resultn | >= | 1.55 PLT.resultn          | >= | 198.5 Hemoglobin.resultn  | =       | Missing      | 0.000705977  | 495 |
| TBILI.resultn | >= | 1.55 PLT.resultn          | >= | 198.5 Hemoglobin.resultn  | <       | 13.75        | 0.00146238   | 495 |
| TBILI.resultn | >= | 1.55 PLT.resultn          | >= | 198.5 Hemoglobin.resultn  | >=      | 13.75        | 0            | 495 |
| ALK.times.uln | =  | Missing TBILI.resultn     | =  | Missing                   |         |              | -0.000564828 | 496 |
| ALK.times.uln | =  | Missing TBILI.resultn     | <  | 1.15                      |         |              | -0.000140802 | 496 |
| ALK.times.uln | =  | Missing TBILI.resultn     | >= | 1.15                      |         |              | 0.005076957  | 496 |
| ALK.times.uln | <  | 6.068877551 TBILI.resultn | =  | Missing                   |         |              | -0.000228648 | 496 |
| ALK.times.uln | <  | 6.068877551 TBILI.resultn | <  | 0.65                      |         |              | -0.000612073 | 496 |
| ALK.times.uln | <  | 6.068877551 TBILI.resultn | >= | 0.65                      |         |              | 0            | 496 |

|               |    |             |                    |    |             |                    |    |             |              |     |
|---------------|----|-------------|--------------------|----|-------------|--------------------|----|-------------|--------------|-----|
| ALK.times.uln | >= | 6.068877551 |                    |    |             |                    |    |             | 0.001919307  | 496 |
| AST.resultn   | =  | Missing     |                    |    |             | Missing            |    |             | -0.005760397 | 497 |
| AST.resultn   | <  | 47.5        |                    |    |             | Missing            |    |             | -0.005775578 | 497 |
| AST.resultn   | >= | 47.5        | PLT.resultn        | =  | Missing     | Missing            |    |             | -0.005098764 | 497 |
| AST.resultn   | >= | 47.5        | PLT.resultn        | <  | 250         | Hemoglobin.resultn | =  | Missing     | 0            | 497 |
| AST.resultn   | >= | 47.5        | PLT.resultn        | <  | 250         | Hemoglobin.resultn | <  | 14.15       | -0.000909893 | 497 |
| AST.resultn   | >= | 47.5        | PLT.resultn        | <  | 250         | Hemoglobin.resultn | >= | 14.15       | -0.005771892 | 497 |
| AST.resultn   | >= | 47.5        | PLT.resultn        | >= | 250         |                    |    | Missing     | -0.004977051 | 497 |
| ALB.resultn   | =  | Missing     |                    |    |             | Missing            |    |             | -0.00328336  | 498 |
| ALB.resultn   | <  | 3.03        |                    |    |             | Missing            |    |             | -0.000738471 | 498 |
| ALB.resultn   | >= | 3.03        | age.yrs            | =  | Missing     | Missing            |    |             | -0.002943704 | 498 |
| ALB.resultn   | >= | 3.03        | age.yrs            | <  | 49.14852841 |                    |    | Missing     | -0.003501854 | 498 |
| ALB.resultn   | >= | 3.03        | age.yrs            | >= | 49.14852841 | psc.yrs.dur        | =  | Missing     | -0.001944909 | 498 |
| ALB.resultn   | >= | 3.03        | age.yrs            | >= | 49.14852841 | psc.yrs.dur        | <  | 0.741957563 | -0.003213328 | 498 |
| ALB.resultn   | >= | 3.03        | age.yrs            | >= | 49.14852841 | psc.yrs.dur        | >= | 0.741957563 | 0            | 498 |
| ALB.resultn   | =  | Missing     |                    |    |             | Missing            |    |             | -0.003221644 | 499 |
| ALB.resultn   | <  | 2.915       |                    |    |             | Missing            |    |             | 0.001724427  | 499 |
| ALB.resultn   | >= | 2.915       | age.yrs            | =  | Missing     | Missing            |    |             | -0.002565743 | 499 |
| ALB.resultn   | >= | 2.915       | age.yrs            | <  | 53.32511978 |                    |    | Missing     | -0.002945742 | 499 |
| ALB.resultn   | >= | 2.915       | age.yrs            | >= | 53.32511978 | TBILI.resultn      | =  | Missing     | -0.00165959  | 499 |
| ALB.resultn   | >= | 2.915       | age.yrs            | >= | 53.32511978 | TBILI.resultn      | <  | 0.95        | -0.00272343  | 499 |
| ALB.resultn   | >= | 2.915       | age.yrs            | >= | 53.32511978 | TBILI.resultn      | >= | 0.95        | 0            | 499 |
| TBILI.resultn | =  | Missing     |                    |    |             | Missing            |    |             | -0.001642521 | 500 |
| TBILI.resultn | <  | 0.85        |                    |    |             | Missing            |    |             | -0.002170809 | 500 |
| TBILI.resultn | >= | 0.85        | Sodium.resultn     | =  | Missing     | Missing            |    |             | -0.001232631 | 500 |
| TBILI.resultn | >= | 0.85        | Sodium.resultn     | <  | 136.5       |                    |    | Missing     | 0.00374765   | 500 |
| TBILI.resultn | >= | 0.85        | Sodium.resultn     | >= | 136.5       | ALK.times.uln      | =  | Missing     | 0            | 500 |
| TBILI.resultn | >= | 0.85        | Sodium.resultn     | >= | 136.5       | ALK.times.uln      | <  | 2.804780876 | -0.002289281 | 500 |
| TBILI.resultn | >= | 0.85        | Sodium.resultn     | >= | 136.5       | ALK.times.uln      | >= | 2.804780876 | 1.32E-05     | 500 |
| ALK.times.uln | =  | Missing     | TBILI.resultn      | =  | Missing     |                    |    |             | -0.00199781  | 501 |
| ALK.times.uln | =  | Missing     | TBILI.resultn      | <  | 1.15        |                    |    |             | -0.002010945 | 501 |
| ALK.times.uln | =  | Missing     | TBILI.resultn      | >= | 1.15        |                    |    |             | 0.00115468   | 501 |
| ALK.times.uln | <  | 6.02        | TBILI.resultn      | =  | Missing     |                    |    |             | -0.001535353 | 501 |
| ALK.times.uln | <  | 6.02        | TBILI.resultn      | <  | 2.75        |                    |    |             | -0.001656565 | 501 |
| ALK.times.uln | <  | 6.02        | TBILI.resultn      | >= | 2.75        |                    |    |             | 0            | 501 |
| ALK.times.uln | >= | 6.02        |                    |    |             |                    |    |             | 0.000753377  | 501 |
| ALB.resultn   | =  | Missing     |                    |    |             | Missing            |    |             | -0.004917857 | 502 |
| ALB.resultn   | <  | 3.135       |                    |    |             | Missing            |    |             | -0.002948338 | 502 |
| ALB.resultn   | >= | 3.135       | psc.yrs.dur        | =  | Missing     | Missing            |    |             | -0.005030979 | 502 |
| ALB.resultn   | >= | 3.135       | psc.yrs.dur        | <  | 6.324435318 |                    |    | Missing     | -0.005362269 | 502 |
| ALB.resultn   | >= | 3.135       | psc.yrs.dur        | >= | 6.324435318 | AST.resultn        | =  | Missing     | -0.002818434 | 502 |
| ALB.resultn   | >= | 3.135       | psc.yrs.dur        | >= | 6.324435318 | AST.resultn        | <  | 44.5        | -0.005636869 | 502 |
| ALB.resultn   | >= | 3.135       | psc.yrs.dur        | >= | 6.324435318 | AST.resultn        | >= | 44.5        | 0            | 502 |
| TBILI.resultn | =  | Missing     |                    |    |             |                    |    |             | 0.000296196  | 503 |
| TBILI.resultn | <  | 1.95        | ALK.times.uln      | =  | Missing     |                    |    |             | 0            | 503 |
| TBILI.resultn | <  | 1.95        | ALK.times.uln      | <  | 5.848260021 |                    |    |             | -0.000225797 | 503 |
| TBILI.resultn | <  | 1.95        | ALK.times.uln      | >= | 5.848260021 |                    |    |             | 0.001861928  | 503 |
| TBILI.resultn | >= | 1.95        | PLT.resultn        | =  | Missing     |                    |    |             | 0.002452176  | 503 |
| TBILI.resultn | >= | 1.95        | PLT.resultn        | <  | 219         |                    |    |             | 0.005267745  | 503 |
| TBILI.resultn | >= | 1.95        | PLT.resultn        | >= | 219         |                    |    |             | 0.000441055  | 503 |
| PLT.resultn   | =  | Missing     |                    |    |             | Missing            |    |             | 0.000568997  | 504 |
| PLT.resultn   | <  | 246         | Hemoglobin.resultn | =  | Missing     | Missing            |    |             | 0.004672284  | 504 |
| PLT.resultn   | <  | 246         | Hemoglobin.resultn | <  | 12.15       |                    |    | Missing     | 0.003368371  | 504 |
| PLT.resultn   | <  | 246         | Hemoglobin.resultn | >= | 12.15       | TBILI.resultn      | =  | Missing     | 0.00073024   | 504 |
| PLT.resultn   | <  | 246         | Hemoglobin.resultn | >= | 12.15       | TBILI.resultn      | <  | 1.05        | 0.001112746  | 504 |
| PLT.resultn   | <  | 246         | Hemoglobin.resultn | >= | 12.15       | TBILI.resultn      | >= | 1.05        | 0            | 504 |
| PLT.resultn   | >= | 246         |                    |    |             | Missing            |    |             | 0.000232907  | 504 |
| ALB.resultn   | =  | Missing     |                    |    |             | Missing            |    |             | -0.001779486 | 505 |
| ALB.resultn   | <  | 2.95        |                    |    |             | Missing            |    |             | 0.000609679  | 505 |
| ALB.resultn   | >= | 2.95        | Sodium.resultn     | =  | Missing     | psc.yrs.dur        | =  | Missing     | -0.002543133 | 505 |
| ALB.resultn   | >= | 2.95        | Sodium.resultn     | =  | Missing     | psc.yrs.dur        | <  | 4.672142368 | -0.002917124 | 505 |
| ALB.resultn   | >= | 2.95        | Sodium.resultn     | =  | Missing     | psc.yrs.dur        | >= | 4.672142368 | 0            | 505 |

|               |    |             |                    |    |             |                    |              |              |              |     |
|---------------|----|-------------|--------------------|----|-------------|--------------------|--------------|--------------|--------------|-----|
| ALB.resultn   | >= | 2.95        | Sodium.resultn     | <  | 136.5       | Missing            | -0.000117826 | 505          |              |     |
| ALB.resultn   | >= | 2.95        | Sodium.resultn     | >= | 136.5       | Missing            | -0.002267293 | 505          |              |     |
| ALB.resultn   | =  | Missing     |                    |    |             |                    | -0.002927216 | 506          |              |     |
| ALB.resultn   | <  | 3.615       | TBILL.resultn      | =  | Missing     |                    | -0.001117728 | 506          |              |     |
| ALB.resultn   | <  | 3.615       | TBILL.resultn      | <  | 1.31        |                    | -0.002061185 | 506          |              |     |
| ALB.resultn   | <  | 3.615       | TBILL.resultn      | >= | 1.31        |                    | 0.00019263   | 506          |              |     |
| ALB.resultn   | >= | 3.615       | psc.yrs.dur        | =  | Missing     |                    | -0.002252806 | 506          |              |     |
| ALB.resultn   | >= | 3.615       | psc.yrs.dur        | <  | 6.410677618 |                    | -0.00254665  | 506          |              |     |
| ALB.resultn   | >= | 3.615       | psc.yrs.dur        | >= | 6.410677618 |                    | 0            | 506          |              |     |
| ALK.times.uln | =  | Missing     | TBILL.resultn      | =  | Missing     |                    | -0.000688314 | 507          |              |     |
| ALK.times.uln | =  | Missing     | TBILL.resultn      | <  | 1.15        |                    | -0.000688332 | 507          |              |     |
| ALK.times.uln | =  | Missing     | TBILL.resultn      | >= | 1.15        |                    | 0.002735887  | 507          |              |     |
| ALK.times.uln | <  | 6.02        | Sodium.resultn     | =  | Missing     |                    | 0            | 507          |              |     |
| ALK.times.uln | <  | 6.02        | Sodium.resultn     | <  | 136.5       |                    | 0.00268584   | 507          |              |     |
| ALK.times.uln | <  | 6.02        | Sodium.resultn     | >= | 136.5       |                    | -0.000569785 | 507          |              |     |
| ALK.times.uln | >= | 6.02        |                    |    |             |                    | 0.001514496  | 507          |              |     |
| TBILL.resultn | =  | Missing     |                    |    |             | Missing            | 0.000698727  | 508          |              |     |
| TBILL.resultn | <  | 1.25        |                    |    |             | Missing            | -0.000310361 | 508          |              |     |
| TBILL.resultn | >= | 1.25        | Hemoglobin.resultn | =  | Missing     | Missing            | 0.003054633  | 508          |              |     |
| TBILL.resultn | >= | 1.25        | Hemoglobin.resultn | <  | 13.75       | PLT.resultn        | =            | Missing      | 0.001009226  | 508 |
| TBILL.resultn | >= | 1.25        | Hemoglobin.resultn | <  | 13.75       | PLT.resultn        | <            | 249.5        | 0.002220298  | 508 |
| TBILL.resultn | >= | 1.25        | Hemoglobin.resultn | <  | 13.75       | PLT.resultn        | >=           | 249.5        | 0            | 508 |
| TBILL.resultn | >= | 1.25        | Hemoglobin.resultn | >= | 13.75       |                    | Missing      | -0.000686082 | 508          |     |
| ALB.resultn   | =  | Missing     |                    |    |             | Missing            | -0.004447667 | 509          |              |     |
| ALB.resultn   | <  | 2.95        |                    |    |             | Missing            | -0.000498079 | 509          |              |     |
| ALB.resultn   | >= | 2.95        | psc.yrs.dur        | =  | Missing     | Missing            | -0.003791449 | 509          |              |     |
| ALB.resultn   | >= | 2.95        | psc.yrs.dur        | <  | 6.783025325 | Missing            | -0.00402385  | 509          |              |     |
| ALB.resultn   | >= | 2.95        | psc.yrs.dur        | >= | 6.783025325 | AST.resultn        | =            | Missing      | -0.00235056  | 509 |
| ALB.resultn   | >= | 2.95        | psc.yrs.dur        | >= | 6.783025325 | AST.resultn        | <            | 47           | -0.0044073   | 509 |
| ALB.resultn   | >= | 2.95        | psc.yrs.dur        | >= | 6.783025325 | AST.resultn        | >=           | 47           | 0            | 509 |
| ALB.resultn   | =  | Missing     |                    |    |             | Missing            | -0.004005824 | 510          |              |     |
| ALB.resultn   | <  | 2.915       |                    |    |             | Missing            | -0.0010343   | 510          |              |     |
| ALB.resultn   | >= | 2.915       | psc.yrs.dur        | =  | Missing     | Missing            | -0.004033354 | 510          |              |     |
| ALB.resultn   | >= | 2.915       | psc.yrs.dur        | <  | 6.262833676 | Missing            | -0.00425456  | 510          |              |     |
| ALB.resultn   | >= | 2.915       | psc.yrs.dur        | >= | 6.262833676 | AST.resultn        | =            | Missing      | -0.002713254 | 510 |
| ALB.resultn   | >= | 2.915       | psc.yrs.dur        | >= | 6.262833676 | AST.resultn        | <            | 47.5         | -0.004672827 | 510 |
| ALB.resultn   | >= | 2.915       | psc.yrs.dur        | >= | 6.262833676 | AST.resultn        | >=           | 47.5         | 0            | 510 |
| ALK.times.uln | =  | Missing     | ALB.resultn        | =  | Missing     |                    | 0            | 511          |              |     |
| ALK.times.uln | =  | Missing     | ALB.resultn        | <  | 3.95        |                    | 0.003445132  | 511          |              |     |
| ALK.times.uln | =  | Missing     | ALB.resultn        | >= | 3.95        |                    | 2.16E-05     | 511          |              |     |
| ALK.times.uln | <  | 5.462893197 |                    |    |             |                    | 0.000482828  | 511          |              |     |
| ALK.times.uln | >= | 5.462893197 | ALK.times.uln      | =  | Missing     |                    | 0.0023324    | 511          |              |     |
| ALK.times.uln | >= | 5.462893197 | ALK.times.uln      | <  | 8.257538256 |                    | 0.004123614  | 511          |              |     |
| ALK.times.uln | >= | 5.462893197 | ALK.times.uln      | >= | 8.257538256 |                    | 3.82E-06     | 511          |              |     |
| ALK.times.uln | =  | Missing     | TBILL.resultn      | =  | Missing     | Missing            | -0.004296312 | 512          |              |     |
| ALK.times.uln | =  | Missing     | TBILL.resultn      | <  | 0.95        | Missing            | -0.00430104  | 512          |              |     |
| ALK.times.uln | =  | Missing     | TBILL.resultn      | >= | 0.95        | age.yrs            | =            | Missing      | -0.002140484 | 512 |
| ALK.times.uln | =  | Missing     | TBILL.resultn      | >= | 0.95        | age.yrs            | <            | 53.35934292  | -0.004280968 | 512 |
| ALK.times.uln | =  | Missing     | TBILL.resultn      | >= | 0.95        | age.yrs            | >=           | 53.35934292  | 0            | 512 |
| ALK.times.uln | <  | 5.446215139 |                    |    |             | Missing            | -0.003853377 | 512          |              |     |
| ALK.times.uln | >= | 5.446215139 |                    |    |             | Missing            | -0.001701711 | 512          |              |     |
| ALB.resultn   | =  | Missing     |                    |    |             | Missing            | -0.000333382 | 513          |              |     |
| ALB.resultn   | <  | 2.95        |                    |    |             | Missing            | 0.004525825  | 513          |              |     |
| ALB.resultn   | >= | 2.95        | TBILL.resultn      | =  | Missing     | Missing            | -0.000544323 | 513          |              |     |
| ALB.resultn   | >= | 2.95        | TBILL.resultn      | <  | 2.45        | age.yrs            | =            | Missing      | -0.00064058  | 513 |
| ALB.resultn   | >= | 2.95        | TBILL.resultn      | <  | 2.45        | age.yrs            | <            | 48.77207392  | -0.001037633 | 513 |
| ALB.resultn   | >= | 2.95        | TBILL.resultn      | <  | 2.45        | age.yrs            | >=           | 48.77207392  | 0            | 513 |
| ALB.resultn   | >= | 2.95        | TBILL.resultn      | >= | 2.45        |                    | Missing      | 0.000713431  | 513          |     |
| TBILL.resultn | =  | Missing     |                    |    |             | Missing            | -0.001833173 | 514          |              |     |
| TBILL.resultn | <  | 2.75        | TBILL.resultn      | =  | Missing     | Missing            | -0.001994889 | 514          |              |     |
| TBILL.resultn | <  | 2.75        | TBILL.resultn      | <  | 0.75        | Missing            | -0.002531898 | 514          |              |     |
| TBILL.resultn | <  | 2.75        | TBILL.resultn      | >= | 0.75        | Hemoglobin.resultn | =            | Missing      | 0            | 514 |

|               |    |             |                |    |             |                    |         |             |              |     |
|---------------|----|-------------|----------------|----|-------------|--------------------|---------|-------------|--------------|-----|
| TBILL.resultn | <  | 2.75        | TBILL.resultn  | >= | 0.75        | Hemoglobin.resultn | <       | 13.35       | -0.000297257 | 514 |
| TBILL.resultn | <  | 2.75        | TBILL.resultn  | >= | 0.75        | Hemoglobin.resultn | >=      | 13.35       | -0.002238994 | 514 |
| TBILL.resultn | >= | 2.75        |                |    |             |                    | Missing |             | 0.000335718  | 514 |
| ALB.resultn   | =  | Missing     |                |    |             |                    | Missing |             | -0.002408987 | 515 |
| ALB.resultn   | <  | 2.825       |                |    |             |                    | Missing |             | 0.000628062  | 515 |
| ALB.resultn   | >= | 2.825       | Sodium.resultn | =  | Missing     | TBILL.resultn      | =       | Missing     | -0.002306113 | 515 |
| ALB.resultn   | >= | 2.825       | Sodium.resultn | =  | Missing     | TBILL.resultn      | <       | 1.25        | -0.002743479 | 515 |
| ALB.resultn   | >= | 2.825       | Sodium.resultn | =  | Missing     | TBILL.resultn      | >=      | 1.25        | 0            | 515 |
| ALB.resultn   | >= | 2.825       | Sodium.resultn | <  | 136.5       |                    | Missing |             | 0.001298453  | 515 |
| ALB.resultn   | >= | 2.825       | Sodium.resultn | >= | 136.5       |                    | Missing |             | -0.002185728 | 515 |
| age.yrs       | =  | Missing     |                |    |             |                    | Missing |             | -0.006150586 | 516 |
| age.yrs       | <  | 51.63175907 |                |    |             |                    | Missing |             | -0.006608723 | 516 |
| age.yrs       | >= | 51.63175907 | AST.resultn    | =  | Missing     |                    | Missing |             | -0.005271173 | 516 |
| age.yrs       | >= | 51.63175907 | AST.resultn    | <  | 51.5        |                    | Missing |             | -0.006935109 | 516 |
| age.yrs       | >= | 51.63175907 | AST.resultn    | >= | 51.5        | psc.yrs.dur        | =       | Missing     | -0.003393913 | 516 |
| age.yrs       | >= | 51.63175907 | AST.resultn    | >= | 51.5        | psc.yrs.dur        | <       | 0.741957563 | -0.005754895 | 516 |
| age.yrs       | >= | 51.63175907 | AST.resultn    | >= | 51.5        | psc.yrs.dur        | >=      | 0.741957563 | 0            | 516 |
| age.yrs       | =  | Missing     |                |    |             |                    | Missing |             | -0.001816905 | 517 |
| age.yrs       | <  | 49.41957563 |                |    |             |                    | Missing |             | -0.002355362 | 517 |
| age.yrs       | >= | 49.41957563 | AST.resultn    | =  | Missing     |                    | Missing |             | -0.000884739 | 517 |
| age.yrs       | >= | 49.41957563 | AST.resultn    | <  | 105.5       | AST.resultn        | =       | Missing     | -0.001450964 | 517 |
| age.yrs       | >= | 49.41957563 | AST.resultn    | <  | 105.5       | AST.resultn        | <       | 57          | -0.002625554 | 517 |
| age.yrs       | >= | 49.41957563 | AST.resultn    | <  | 105.5       | AST.resultn        | >=      | 57          | 0            | 517 |
| age.yrs       | >= | 49.41957563 | AST.resultn    | >= | 105.5       |                    | Missing |             | 0.001984137  | 517 |
| ALB.resultn   | =  | Missing     |                |    |             |                    | Missing |             | -0.004204774 | 518 |
| ALB.resultn   | <  | 2.95        |                |    |             |                    | Missing |             | -0.002162919 | 518 |
| ALB.resultn   | >= | 2.95        | Sodium.resultn | =  | Missing     |                    | Missing |             | -0.00465338  | 518 |
| ALB.resultn   | >= | 2.95        | Sodium.resultn | <  | 138.5       | psc.yrs.dur        | =       | Missing     | -0.002811485 | 518 |
| ALB.resultn   | >= | 2.95        | Sodium.resultn | <  | 138.5       | psc.yrs.dur        | <       | 1.196440794 | -0.004649763 | 518 |
| ALB.resultn   | >= | 2.95        | Sodium.resultn | <  | 138.5       | psc.yrs.dur        | >=      | 1.196440794 | 0            | 518 |
| ALB.resultn   | >= | 2.95        | Sodium.resultn | >= | 138.5       |                    | Missing |             | -0.004813022 | 518 |
| ALB.resultn   | =  | Missing     |                |    |             |                    | Missing |             | -0.0027829   | 519 |
| ALB.resultn   | <  | 3.13        |                |    |             |                    | Missing |             | -0.000113515 | 519 |
| ALB.resultn   | >= | 3.13        | age.yrs        | =  | Missing     |                    | Missing |             | -0.002127752 | 519 |
| ALB.resultn   | >= | 3.13        | age.yrs        | <  | 46.2477755  |                    | Missing |             | -0.002786902 | 519 |
| ALB.resultn   | >= | 3.13        | age.yrs        | >= | 46.2477755  | AST.resultn        | =       | Missing     | -0.001270149 | 519 |
| ALB.resultn   | >= | 3.13        | age.yrs        | >= | 46.2477755  | AST.resultn        | <       | 50.5        | -0.002782231 | 519 |
| ALB.resultn   | >= | 3.13        | age.yrs        | >= | 46.2477755  | AST.resultn        | >=      | 50.5        | 0            | 519 |
| ALB.resultn   | =  | Missing     |                |    |             |                    | Missing |             | -0.003959297 | 520 |
| ALB.resultn   | <  | 3.225       |                |    |             |                    | Missing |             | -0.001652544 | 520 |
| ALB.resultn   | >= | 3.225       | ALK.times.uln  | =  | Missing     | TBILL.resultn      | =       | Missing     | -0.00342089  | 520 |
| ALB.resultn   | >= | 3.225       | ALK.times.uln  | =  | Missing     | TBILL.resultn      | <       | 0.95        | -0.004321125 | 520 |
| ALB.resultn   | >= | 3.225       | ALK.times.uln  | =  | Missing     | TBILL.resultn      | >=      | 0.95        | 0            | 520 |
| ALB.resultn   | >= | 3.225       | ALK.times.uln  | <  | 5.438574341 |                    | Missing |             | -0.003923529 | 520 |
| ALB.resultn   | >= | 3.225       | ALK.times.uln  | >= | 5.438574341 |                    | Missing |             | -0.00171651  | 520 |
| ALK.times.uln | =  | Missing     | TBILL.resultn  | =  | Missing     |                    |         |             | 1.73E-05     | 521 |
| ALK.times.uln | =  | Missing     | TBILL.resultn  | <  | 1.31        |                    |         |             | 6.26E-06     | 521 |
| ALK.times.uln | =  | Missing     | TBILL.resultn  | >= | 1.31        |                    |         |             | 0.003473746  | 521 |
| ALK.times.uln | <  | 5.857962963 | PLT.resultn    | =  | Missing     |                    |         |             | 0            | 521 |
| ALK.times.uln | <  | 5.857962963 | PLT.resultn    | <  | 187         |                    |         |             | 0.003211671  | 521 |
| ALK.times.uln | <  | 5.857962963 | PLT.resultn    | >= | 187         |                    |         |             | 0.000250108  | 521 |
| ALK.times.uln | >= | 5.857962963 |                |    |             |                    |         |             | 0.003080017  | 521 |
| ALB.resultn   | =  | Missing     |                |    |             |                    |         |             | 4.61E-06     | 522 |
| ALB.resultn   | <  | 3.225       | TBILL.resultn  | =  | Missing     |                    |         |             | 0.002069567  | 522 |
| ALB.resultn   | <  | 3.225       | TBILL.resultn  | <  | 1.31        |                    |         |             | 0.001061565  | 522 |
| ALB.resultn   | <  | 3.225       | TBILL.resultn  | >= | 1.31        |                    |         |             | 0.00316157   | 522 |
| ALB.resultn   | >= | 3.225       | PLT.resultn    | =  | Missing     |                    |         |             | 0            | 522 |
| ALB.resultn   | >= | 3.225       | PLT.resultn    | <  | 198.5       |                    |         |             | 0.002559821  | 522 |
| ALB.resultn   | >= | 3.225       | PLT.resultn    | >= | 198.5       |                    |         |             | 0.000411867  | 522 |
| TBILL.resultn | =  | Missing     |                |    |             |                    |         |             | 0.001888552  | 523 |
| TBILL.resultn | <  | 1.55        | PLT.resultn    | =  | Missing     |                    |         |             | 0            | 523 |
| TBILL.resultn | <  | 1.55        | PLT.resultn    | <  | 247         |                    |         |             | 0.001355682  | 523 |

|               |    |                         |             |               |                |             |              |              |     |
|---------------|----|-------------------------|-------------|---------------|----------------|-------------|--------------|--------------|-----|
| TBILL.resultn | <  | 1.55 PLT.resultn        | >=          | 247           |                |             | 0.000142604  | 523          |     |
| TBILL.resultn | >= | 1.55 PLT.resultn        | =           | Missing       |                |             | 0.002446162  | 523          |     |
| TBILL.resultn | >= | 1.55 PLT.resultn        | <           | 247.5         |                |             | 0.004073014  | 523          |     |
| TBILL.resultn | >= | 1.55 PLT.resultn        | >=          | 247.5         |                |             | 0.000627916  | 523          |     |
| TBILL.resultn | =  | Missing                 |             |               |                | Missing     | -0.00202787  | 524          |     |
| TBILL.resultn | <  | 1.05                    |             |               |                | Missing     | -0.002821289 | 524          |     |
| TBILL.resultn | >= | 1.05 Hemoglobin.resultn | =           | Missing       |                | Missing     | 0.00190939   | 524          |     |
| TBILL.resultn | >= | 1.05 Hemoglobin.resultn | <           | 13.75 age.yrs | =              | Missing     | -0.00094179  | 524          |     |
| TBILL.resultn | >= | 1.05 Hemoglobin.resultn | <           | 13.75 age.yrs | <              | 47.51403149 | -0.001726614 | 524          |     |
| TBILL.resultn | >= | 1.05 Hemoglobin.resultn | <           | 13.75 age.yrs | >=             | 47.51403149 | 0            | 524          |     |
| TBILL.resultn | >= | 1.05 Hemoglobin.resultn | >=          | 13.75         |                | Missing     | -0.002533379 | 524          |     |
| ALB.resultn   | =  | Missing                 |             |               |                |             | -0.000913763 | 525          |     |
| ALB.resultn   | <  | 3.225 psc.yrs.dur       | =           | Missing       |                |             | 0.00194976   | 525          |     |
| ALB.resultn   | <  | 3.225 psc.yrs.dur       | <           | 1.549623546   |                |             | 0.00036681   | 525          |     |
| ALB.resultn   | <  | 3.225 psc.yrs.dur       | >=          | 1.549623546   |                |             | 0.003532711  | 525          |     |
| ALB.resultn   | >= | 3.225 ALK.times.uln     | =           | Missing       |                |             | 0            | 525          |     |
| ALB.resultn   | >= | 3.225 ALK.times.uln     | <           | 6.02          |                |             | -0.000528266 | 525          |     |
| ALB.resultn   | >= | 3.225 ALK.times.uln     | >=          | 6.02          |                |             | 0.00181189   | 525          |     |
| TBILL.resultn | =  | Missing                 |             |               |                |             | 0.001572923  | 526          |     |
| TBILL.resultn | <  | 2.45 Sodium.resultn     | =           | Missing       |                |             | 0            | 526          |     |
| TBILL.resultn | <  | 2.45 Sodium.resultn     | <           | 142.5         |                |             | 0.000824997  | 526          |     |
| TBILL.resultn | <  | 2.45 Sodium.resultn     | >=          | 142.5         |                |             | 0.002220614  | 526          |     |
| TBILL.resultn | >= | 2.45 psc.yrs.dur        | =           | Missing       |                |             | 0.002524654  | 526          |     |
| TBILL.resultn | >= | 2.45 psc.yrs.dur        | <           | 2.205338809   |                |             | 0.001140508  | 526          |     |
| TBILL.resultn | >= | 2.45 psc.yrs.dur        | >=          | 2.205338809   |                |             | 0.0039088    | 526          |     |
| TBILL.resultn | =  | Missing                 |             |               |                | Missing     | -2.77E-05    | 527          |     |
| TBILL.resultn | <  | 1.55                    |             |               |                | Missing     | -0.001127166 | 527          |     |
| TBILL.resultn | >= | 1.55 age.yrs            | =           | Missing       |                | Missing     | 0.000153382  | 527          |     |
| TBILL.resultn | >= | 1.55 age.yrs            | <           | 46.21081451   |                | Missing     | -0.001212669 | 527          |     |
| TBILL.resultn | >= | 1.55 age.yrs            | >=          | 46.21081451   | TBILL.resultn  | =           | Missing      | 0.00145734   | 527 |
| TBILL.resultn | >= | 1.55 age.yrs            | >=          | 46.21081451   | TBILL.resultn  | <           | 3            | 0.00267179   | 527 |
| TBILL.resultn | >= | 1.55 age.yrs            | >=          | 46.21081451   | TBILL.resultn  | >=          | 3            | 0            | 527 |
| ALB.resultn   | =  | Missing                 |             |               |                | Missing     | -0.004291955 | 528          |     |
| ALB.resultn   | <  | 2.915                   |             |               |                | Missing     | -0.000167995 | 528          |     |
| ALB.resultn   | >= | 2.915 psc.yrs.dur       | =           | Missing       |                | Missing     | -0.003646613 | 528          |     |
| ALB.resultn   | >= | 2.915 psc.yrs.dur       | <           | 6.246406571   |                | Missing     | -0.003921674 | 528          |     |
| ALB.resultn   | >= | 2.915 psc.yrs.dur       | >=          | 6.246406571   | AST.resultn    | =           | Missing      | -0.002047821 | 528 |
| ALB.resultn   | >= | 2.915 psc.yrs.dur       | >=          | 6.246406571   | AST.resultn    | <           | 89.5         | -0.003276514 | 528 |
| ALB.resultn   | >= | 2.915 psc.yrs.dur       | >=          | 6.246406571   | AST.resultn    | >=          | 89.5         | 0            | 528 |
| psc.yrs.dur   | =  | Missing                 |             |               |                | Missing     | -0.001116423 | 529          |     |
| psc.yrs.dur   | <  | 6.410677618             |             |               |                | Missing     | -0.001396973 | 529          |     |
| psc.yrs.dur   | >= | 6.410677618             | AST.resultn | =             | Missing        |             | 0.000639018  | 529          |     |
| psc.yrs.dur   | >= | 6.410677618             | AST.resultn | <             | 43             |             | Missing      | -0.001940631 | 529 |
| psc.yrs.dur   | >= | 6.410677618             | AST.resultn | >=            | 43 psc.yrs.dur | =           | Missing      | 0.001713872  | 529 |
| psc.yrs.dur   | >= | 6.410677618             | AST.resultn | >=            | 43 psc.yrs.dur | <           | 11.64818617  | 0.003427744  | 529 |
| psc.yrs.dur   | >= | 6.410677618             | AST.resultn | >=            | 43 psc.yrs.dur | >=          | 11.64818617  | 0            | 529 |
| ALB.resultn   | =  | Missing                 |             |               |                | Missing     | -0.003175253 | 530          |     |
| ALB.resultn   | <  | 2.95                    |             |               |                | Missing     | 0.001122508  | 530          |     |
| ALB.resultn   | >= | 2.95 age.yrs            | =           | Missing       |                | Missing     | -0.00250496  | 530          |     |
| ALB.resultn   | >= | 2.95 age.yrs            | <           | 55.69883641   |                | Missing     | -0.002838037 | 530          |     |
| ALB.resultn   | >= | 2.95 age.yrs            | >=          | 55.69883641   | ALK.times.uln  | =           | Missing      | 0            | 530 |
| ALB.resultn   | >= | 2.95 age.yrs            | >=          | 55.69883641   | ALK.times.uln  | <           | 3.111635028  | -0.003155755 | 530 |
| ALB.resultn   | >= | 2.95 age.yrs            | >=          | 55.69883641   | ALK.times.uln  | >=          | 3.111635028  | 0.000857273  | 530 |
| TBILL.resultn | =  | Missing                 |             |               |                |             | -0.001731116 | 531          |     |
| TBILL.resultn | <  | 2.25 age.yrs            | =           | Missing       |                |             | -0.001891886 | 531          |     |
| TBILL.resultn | <  | 2.25 age.yrs            | <           | 60.46132786   |                |             | -0.002173656 | 531          |     |
| TBILL.resultn | <  | 2.25 age.yrs            | >=          | 60.46132786   |                |             | 0            | 531          |     |
| TBILL.resultn | >= | 2.25 psc.yrs.dur        | =           | Missing       |                |             | -0.000269123 | 531          |     |
| TBILL.resultn | >= | 2.25 psc.yrs.dur        | <           | 0.407939767   |                |             | -0.002072924 | 531          |     |
| TBILL.resultn | >= | 2.25 psc.yrs.dur        | >=          | 0.407939767   |                |             | 0.001257171  | 531          |     |
| psc.yrs.dur   | =  | Missing                 |             |               |                | Missing     | -0.004443658 | 532          |     |
| psc.yrs.dur   | <  | 1.994524298             |             |               |                | Missing     | -0.004883795 | 532          |     |

|               |    |             |               |    |              |                    |              |              |              |     |
|---------------|----|-------------|---------------|----|--------------|--------------------|--------------|--------------|--------------|-----|
| psc.yrs.dur   | >= | 1.994524298 | AST.resultn   | =  | Missing      | Missing            | -0.003536871 | 532          |              |     |
| psc.yrs.dur   | >= | 1.994524298 | AST.resultn   | <  | 57.5         | Missing            | -0.00523682  | 532          |              |     |
| psc.yrs.dur   | >= | 1.994524298 | AST.resultn   | >= | 57.5 age.yrs | =                  | Missing      | -0.002426701 | 532          |     |
| psc.yrs.dur   | >= | 1.994524298 | AST.resultn   | >= | 57.5 age.yrs | <                  | 48.38603696  | -0.004246726 | 532          |     |
| psc.yrs.dur   | >= | 1.994524298 | AST.resultn   | >= | 57.5 age.yrs | >=                 | 48.38603696  | 0            | 532          |     |
| ALB.resultn   | =  | Missing     |               |    |              | Missing            | -0.002993261 | 533          |              |     |
| ALB.resultn   | <  | 2.915       |               |    |              | Missing            | 0.000410241  | 533          |              |     |
| ALB.resultn   | >= | 2.915       | TBILL.resultn | =  | Missing      | Missing            | -0.002218948 | 533          |              |     |
| ALB.resultn   | >= | 2.915       | TBILL.resultn | <  | 0.85         | Missing            | -0.002871976 | 533          |              |     |
| ALB.resultn   | >= | 2.915       | TBILL.resultn | >= | 0.85 age.yrs | =                  | Missing      | -0.001466976 | 533          |     |
| ALB.resultn   | >= | 2.915       | TBILL.resultn | >= | 0.85 age.yrs | <                  | 53.55509925  | -0.002200464 | 533          |     |
| ALB.resultn   | >= | 2.915       | TBILL.resultn | >= | 0.85 age.yrs | >=                 | 53.55509925  | 0            | 533          |     |
| ALB.resultn   | =  | Missing     |               |    |              |                    | -0.001039736 | 534          |              |     |
| ALB.resultn   | <  | 3.34        | psc.yrs.dur   | =  | Missing      |                    | 0.001248592  | 534          |              |     |
| ALB.resultn   | <  | 3.34        | psc.yrs.dur   | <  | 1.330595483  |                    | -0.000817337 | 534          |              |     |
| ALB.resultn   | <  | 3.34        | psc.yrs.dur   | >= | 1.330595483  |                    | 0.003521115  | 534          |              |     |
| ALB.resultn   | >= | 3.34        | ALK.times.uln | =  | Missing      |                    | 0            | 534          |              |     |
| ALB.resultn   | >= | 3.34        | ALK.times.uln | <  | 3.309946654  |                    | -0.001518822 | 534          |              |     |
| ALB.resultn   | >= | 3.34        | ALK.times.uln | >= | 3.309946654  |                    | -8.13E-05    | 534          |              |     |
| ALB.resultn   | =  | Missing     |               |    |              |                    | -0.001522728 | 535          |              |     |
| ALB.resultn   | <  | 3.225       | AST.resultn   | =  | Missing      |                    | 4.47E-05     | 535          |              |     |
| ALB.resultn   | <  | 3.225       | AST.resultn   | <  | 75           |                    | 8.94E-05     | 535          |              |     |
| ALB.resultn   | <  | 3.225       | AST.resultn   | >= | 75           |                    | 0            | 535          |              |     |
| ALB.resultn   | >= | 3.225       | ALK.times.uln | =  | Missing      |                    | -0.002089132 | 535          |              |     |
| ALB.resultn   | >= | 3.225       | ALK.times.uln | <  | 5.462893197  |                    | -0.002287896 | 535          |              |     |
| ALB.resultn   | >= | 3.225       | ALK.times.uln | >= | 5.462893197  |                    | -0.000670193 | 535          |              |     |
| AST.resultn   | =  | Missing     |               |    |              | Missing            | -6.25E-06    | 536          |              |     |
| AST.resultn   | <  | 43          |               |    |              | Missing            | -1.37E-05    | 536          |              |     |
| AST.resultn   | >= | 43          | age.yrs       | =  | Missing      | Missing            | 0.001562796  | 536          |              |     |
| AST.resultn   | >= | 43          | age.yrs       | <  | 62.21629021  | ALB.resultn        | =            | Missing      | 0            | 536 |
| AST.resultn   | >= | 43          | age.yrs       | <  | 62.21629021  | ALB.resultn        | <            | 3.135        | 0.002250341  | 536 |
| AST.resultn   | >= | 43          | age.yrs       | <  | 62.21629021  | ALB.resultn        | >=           | 3.135        | 0.000991492  | 536 |
| AST.resultn   | >= | 43          | age.yrs       | >= | 62.21629021  |                    | Missing      | 0.007178767  | 536          |     |
| ALK.times.uln | =  | Missing     | TBILL.resultn | =  | Missing      |                    | Missing      | -0.003913361 | 537          |     |
| ALK.times.uln | =  | Missing     | TBILL.resultn | <  | 0.95         |                    | Missing      | -0.003946696 | 537          |     |
| ALK.times.uln | =  | Missing     | TBILL.resultn | >= | 0.95         | psc.yrs.dur        | =            | Missing      | -0.001512154 | 537 |
| ALK.times.uln | =  | Missing     | TBILL.resultn | >= | 0.95         | psc.yrs.dur        | <            | 0.606433949  | -0.003436713 | 537 |
| ALK.times.uln | =  | Missing     | TBILL.resultn | >= | 0.95         | psc.yrs.dur        | >=           | 0.606433949  | 0            | 537 |
| ALK.times.uln | <  | 6.02        |               |    |              | Missing            | -0.003227893 | 537          |              |     |
| ALK.times.uln | >= | 6.02        |               |    |              | Missing            | -0.00118399  | 537          |              |     |
| ALB.resultn   | =  | Missing     |               |    |              |                    | -0.000841607 | 538          |              |     |
| ALB.resultn   | <  | 3.31        | TBILL.resultn | =  | Missing      |                    | 0.001341826  | 538          |              |     |
| ALB.resultn   | <  | 3.31        | TBILL.resultn | <  | 1.6          |                    | 0.000448183  | 538          |              |     |
| ALB.resultn   | <  | 3.31        | TBILL.resultn | >= | 1.6          |                    | 0.002682292  | 538          |              |     |
| ALB.resultn   | >= | 3.31        | ALK.times.uln | =  | Missing      |                    | 0            | 538          |              |     |
| ALB.resultn   | >= | 3.31        | ALK.times.uln | <  | 5.462893197  |                    | -0.000352526 | 538          |              |     |
| ALB.resultn   | >= | 3.31        | ALK.times.uln | >= | 5.462893197  |                    | 0.001924455  | 538          |              |     |
| ALB.resultn   | =  | Missing     |               |    |              | Missing            | -0.001231107 | 539          |              |     |
| ALB.resultn   | <  | 2.95        |               |    |              | Missing            | 0.003558852  | 539          |              |     |
| ALB.resultn   | >= | 2.95        | TBILL.resultn | =  | Missing      | Missing            | -0.000647832 | 539          |              |     |
| ALB.resultn   | >= | 2.95        | TBILL.resultn | <  | 2.05         | Hemoglobin.resultn | =            | Missing      | 0            | 539 |
| ALB.resultn   | >= | 2.95        | TBILL.resultn | <  | 2.05         | Hemoglobin.resultn | <            | 13.35        | -0.000511954 | 539 |
| ALB.resultn   | >= | 2.95        | TBILL.resultn | <  | 2.05         | Hemoglobin.resultn | >=           | 13.35        | -0.001255455 | 539 |
| ALB.resultn   | >= | 2.95        | TBILL.resultn | >= | 2.05         |                    | Missing      | 0.000558422  | 539          |     |
| TBILL.resultn | =  | Missing     |               |    |              |                    | -0.001208158 | 540          |              |     |
| TBILL.resultn | <  | 1.9         | age.yrs       | =  | Missing      |                    | -0.001930414 | 540          |              |     |
| TBILL.resultn | <  | 1.9         | age.yrs       | <  | 64.65571526  |                    | -0.002160463 | 540          |              |     |
| TBILL.resultn | <  | 1.9         | age.yrs       | >= | 64.65571526  |                    | 0            | 540          |              |     |
| TBILL.resultn | >= | 1.9         | age.yrs       | =  | Missing      |                    | 7.34E-05     | 540          |              |     |
| TBILL.resultn | >= | 1.9         | age.yrs       | <  | 48.64476386  |                    | -0.00087319  | 540          |              |     |
| TBILL.resultn | >= | 1.9         | age.yrs       | >= | 48.64476386  |                    | 0.001192036  | 540          |              |     |
| ALB.resultn   | =  | Missing     |               |    |              | Missing            | -0.004750627 | 541          |              |     |

|               |    |                           |    |                     |             |             |              |              |     |
|---------------|----|---------------------------|----|---------------------|-------------|-------------|--------------|--------------|-----|
| ALB.resultn   | <  | 3.105                     |    |                     |             | Missing     | -0.002755196 | 541          |     |
| ALB.resultn   | >= | 3.105 PLT.resultn         | =  | Missing             |             | Missing     | -0.004706042 | 541          |     |
| ALB.resultn   | >= | 3.105 PLT.resultn         | <  | 198.5 TBILL.resultn | =           | Missing     | -0.003044301 | 541          |     |
| ALB.resultn   | >= | 3.105 PLT.resultn         | <  | 198.5 TBILL.resultn | <           | 0.85        | -0.005436251 | 541          |     |
| ALB.resultn   | >= | 3.105 PLT.resultn         | <  | 198.5 TBILL.resultn | >=          | 0.85        | 0            | 541          |     |
| ALB.resultn   | >= | 3.105 PLT.resultn         | >= | 198.5               |             | Missing     | -0.00508973  | 541          |     |
| psc.yrs.dur   | =  | Missing                   |    |                     |             |             | 3.71E-05     | 542          |     |
| psc.yrs.dur   | <  | 7.404517454 PLT.resultn   | =  | Missing             |             |             | 0            | 542          |     |
| psc.yrs.dur   | <  | 7.404517454 PLT.resultn   | <  | 185.5               |             |             | 0.00183909   | 542          |     |
| psc.yrs.dur   | <  | 7.404517454 PLT.resultn   | >= | 185.5               |             |             | -0.000610197 | 542          |     |
| psc.yrs.dur   | >= | 7.404517454 TBILL.resultn | =  | Missing             |             |             | 0.003295267  | 542          |     |
| psc.yrs.dur   | >= | 7.404517454 TBILL.resultn | <  | 0.95                |             |             | 0.001971842  | 542          |     |
| psc.yrs.dur   | >= | 7.404517454 TBILL.resultn | >= | 0.95                |             |             | 0.004122408  | 542          |     |
| TBILL.resultn | =  | Missing                   |    |                     |             |             | 0.001261087  | 543          |     |
| TBILL.resultn | <  | 2.35 ALK.times.uln        | =  | Missing             |             |             | 0            | 543          |     |
| TBILL.resultn | <  | 2.35 ALK.times.uln        | <  | 5.963877551         |             |             | -0.000697775 | 543          |     |
| TBILL.resultn | <  | 2.35 ALK.times.uln        | >= | 5.963877551         |             |             | 0.001903655  | 543          |     |
| TBILL.resultn | >= | 2.35 PLT.resultn          | =  | Missing             |             |             | 0.001302977  | 543          |     |
| TBILL.resultn | >= | 2.35 PLT.resultn          | <  | 229.5               |             |             | 0.003613439  | 543          |     |
| TBILL.resultn | >= | 2.35 PLT.resultn          | >= | 229.5               |             |             | -0.001007484 | 543          |     |
| ALB.resultn   | =  | Missing                   |    |                     |             | Missing     | -0.001066163 | 544          |     |
| ALB.resultn   | <  | 3.225                     |    |                     |             | Missing     | 0.001031509  | 544          |     |
| ALB.resultn   | >= | 3.225 PLT.resultn         | =  | Missing             |             | Missing     | -0.000733683 | 544          |     |
| ALB.resultn   | >= | 3.225 PLT.resultn         | <  | 185.5               |             | Missing     | 0.00127831   | 544          |     |
| ALB.resultn   | >= | 3.225 PLT.resultn         | >= | 185.5 age.yrs       | =           | Missing     | -0.001019329 | 544          |     |
| ALB.resultn   | >= | 3.225 PLT.resultn         | >= | 185.5 age.yrs       | <           | 51.37166324 | -0.001537935 | 544          |     |
| ALB.resultn   | >= | 3.225 PLT.resultn         | >= | 185.5 age.yrs       | >=          | 51.37166324 | 0            | 544          |     |
| ALB.resultn   | =  | Missing                   |    |                     |             | Missing     | 0.00085636   | 545          |     |
| ALB.resultn   | <  | 3.15                      |    |                     |             | Missing     | 0.002735937  | 545          |     |
| ALB.resultn   | >= | 3.15 Sodium.resultn       | =  | Missing             |             | Missing     | 0.000270714  | 545          |     |
| ALB.resultn   | >= | 3.15 Sodium.resultn       | <  | 136.5               |             | Missing     | 0.002551884  | 545          |     |
| ALB.resultn   | >= | 3.15 Sodium.resultn       | >= | 136.5 PLT.resultn   | =           | Missing     | 0.000245359  | 545          |     |
| ALB.resultn   | >= | 3.15 Sodium.resultn       | >= | 136.5 PLT.resultn   | <           | 185.5       | 0.00238667   | 545          |     |
| ALB.resultn   | >= | 3.15 Sodium.resultn       | >= | 136.5 PLT.resultn   | >=          | 185.5       | 0            | 545          |     |
| PLT.resultn   | =  | Missing                   |    |                     |             |             | -0.002805426 | 546          |     |
| PLT.resultn   | <  | 195.5 TBILL.resultn       | =  | Missing             |             |             | -0.001768692 | 546          |     |
| PLT.resultn   | <  | 195.5 TBILL.resultn       | <  | 1.25                |             |             | -0.00335451  | 546          |     |
| PLT.resultn   | <  | 195.5 TBILL.resultn       | >= | 1.25                |             |             | 0.000183083  | 546          |     |
| PLT.resultn   | >= | 195.5 age.yrs             | =  | Missing             |             |             | -0.002598922 | 546          |     |
| PLT.resultn   | >= | 195.5 age.yrs             | <  | 64.89253936         |             |             | -0.002829938 | 546          |     |
| PLT.resultn   | >= | 195.5 age.yrs             | >= | 64.89253936         |             |             | 0            | 546          |     |
| PLT.resultn   | =  | Missing                   |    |                     |             |             | 0.000108055  | 547          |     |
| PLT.resultn   | <  | 196 TBILL.resultn         | =  | Missing             |             |             | 0.001417146  | 547          |     |
| PLT.resultn   | <  | 196 TBILL.resultn         | <  | 1.4                 |             |             | 0.000646916  | 547          |     |
| PLT.resultn   | <  | 196 TBILL.resultn         | >= | 1.4                 |             |             | 0.003034629  | 547          |     |
| PLT.resultn   | >= | 196 Sodium.resultn        | =  | Missing             |             |             | 0            | 547          |     |
| PLT.resultn   | >= | 196 Sodium.resultn        | <  | 138.5               |             |             | 0.000903761  | 547          |     |
| PLT.resultn   | >= | 196 Sodium.resultn        | >= | 138.5               |             |             | -0.00046251  | 547          |     |
| PLT.resultn   | =  | Missing                   |    |                     |             |             | -0.001784378 | 548          |     |
| PLT.resultn   | <  | 206.5 TBILL.resultn       | =  | Missing             |             |             | -0.00022532  | 548          |     |
| PLT.resultn   | <  | 206.5 TBILL.resultn       | <  | 1.55                |             |             | -0.001044993 | 548          |     |
| PLT.resultn   | <  | 206.5 TBILL.resultn       | >= | 1.55                |             |             | 0.001987798  | 548          |     |
| PLT.resultn   | >= | 206.5 age.yrs             | =  | Missing             |             |             | -0.001552226 | 548          |     |
| PLT.resultn   | >= | 206.5 age.yrs             | <  | 55.59342916         |             |             | -0.001961259 | 548          |     |
| PLT.resultn   | >= | 206.5 age.yrs             | >= | 55.59342916         |             |             | 0            | 548          |     |
| ALB.resultn   | =  | Missing                   |    |                     |             | Missing     | -0.003723914 | 549          |     |
| ALB.resultn   | <  | 2.95                      |    |                     |             | Missing     | -0.000257497 | 549          |     |
| ALB.resultn   | >= | 2.95 ALK.times.uln        | =  | Missing             | psc.yrs.dur | =           | Missing      | -0.003162825 | 549 |
| ALB.resultn   | >= | 2.95 ALK.times.uln        | =  | Missing             | psc.yrs.dur | <           | 6.410677618  | -0.004250046 | 549 |
| ALB.resultn   | >= | 2.95 ALK.times.uln        | =  | Missing             | psc.yrs.dur | >=          | 6.410677618  | 0            | 549 |
| ALB.resultn   | >= | 2.95 ALK.times.uln        | <  | 5.965616681         |             | Missing     | -0.004172161 | 549          |     |
| ALB.resultn   | >= | 2.95 ALK.times.uln        | >= | 5.965616681         |             | Missing     | -0.001697543 | 549          |     |

|               |    |             |                |    |             |                |    |              |              |     |
|---------------|----|-------------|----------------|----|-------------|----------------|----|--------------|--------------|-----|
| ALK.times.uln | =  | Missing     | TBILL.resultn  | =  | Missing     |                |    | 0.00010979   | 550          |     |
| ALK.times.uln | =  | Missing     | TBILL.resultn  | <  | 1.1         |                |    | -0.000660421 | 550          |     |
| ALK.times.uln | =  | Missing     | TBILL.resultn  | >= | 1.1         |                |    | 0.001852899  | 550          |     |
| ALK.times.uln | <  | 5.462893197 | PLT.resultn    | =  | Missing     |                |    | 0            | 550          |     |
| ALK.times.uln | <  | 5.462893197 | PLT.resultn    | <  | 209.5       |                |    | 0.000570786  | 550          |     |
| ALK.times.uln | <  | 5.462893197 | PLT.resultn    | >= | 209.5       |                |    | -0.000885309 | 550          |     |
| ALK.times.uln | >= | 5.462893197 |                |    |             |                |    | 0.001750253  | 550          |     |
| ALB.resultn   | =  | Missing     |                |    |             |                |    | -0.000735931 | 551          |     |
| ALB.resultn   | <  | 3.31        | TBILL.resultn  | =  | Missing     |                |    | 0.001500911  | 551          |     |
| ALB.resultn   | <  | 3.31        | TBILL.resultn  | <  | 1.2         |                |    | 0.000262687  | 551          |     |
| ALB.resultn   | <  | 3.31        | TBILL.resultn  | >= | 1.2         |                |    | 0.003358246  | 551          |     |
| ALB.resultn   | >= | 3.31        | TBILL.resultn  | =  | Missing     |                |    | -0.000546767 | 551          |     |
| ALB.resultn   | >= | 3.31        | TBILL.resultn  | <  | 0.75        |                |    | -0.001147021 | 551          |     |
| ALB.resultn   | >= | 3.31        | TBILL.resultn  | >= | 0.75        |                |    | 0            | 551          |     |
| TBILL.resultn | =  | Missing     |                |    |             | Missing        |    | 0.001160648  | 552          |     |
| TBILL.resultn | <  | 3.5         | PLT.resultn    | =  | Missing     | Missing        |    | 0.000976412  | 552          |     |
| TBILL.resultn | <  | 3.5         | PLT.resultn    | <  | 185.5       | Missing        |    | 0.003116482  | 552          |     |
| TBILL.resultn | <  | 3.5         | PLT.resultn    | >= | 185.5       | Sodium.resultn | =  | Missing      | 0            | 552 |
| TBILL.resultn | <  | 3.5         | PLT.resultn    | >= | 185.5       | Sodium.resultn | <  | 142.5        | 0.000181448  | 552 |
| TBILL.resultn | <  | 3.5         | PLT.resultn    | >= | 185.5       | Sodium.resultn | >= | 142.5        | 0.002674673  | 552 |
| TBILL.resultn | >= | 3.5         |                |    |             | Missing        |    | 0.00324074   | 552          |     |
| PLT.resultn   | =  | Missing     |                |    |             |                |    | 0.000227728  | 553          |     |
| PLT.resultn   | <  | 198.5       | TBILL.resultn  | =  | Missing     |                |    | 0.002086764  | 553          |     |
| PLT.resultn   | <  | 198.5       | TBILL.resultn  | <  | 1.25        |                |    | 0.0010215    | 553          |     |
| PLT.resultn   | <  | 198.5       | TBILL.resultn  | >= | 1.25        |                |    | 0.003926765  | 553          |     |
| PLT.resultn   | >= | 198.5       | ALK.times.uln  | =  | Missing     |                |    | 0            | 553          |     |
| PLT.resultn   | >= | 198.5       | ALK.times.uln  | <  | 7.355555556 |                |    | -0.000342728 | 553          |     |
| PLT.resultn   | >= | 198.5       | ALK.times.uln  | >= | 7.355555556 |                |    | 0.002183794  | 553          |     |
| TBILL.resultn | =  | Missing     |                |    |             |                |    | 0.000937545  | 554          |     |
| TBILL.resultn | <  | 1.95        | Sodium.resultn | =  | Missing     |                |    | 0            | 554          |     |
| TBILL.resultn | <  | 1.95        | Sodium.resultn | <  | 138.5       |                |    | 0.001700818  | 554          |     |
| TBILL.resultn | <  | 1.95        | Sodium.resultn | >= | 138.5       |                |    | 0.000181549  | 554          |     |
| TBILL.resultn | >= | 1.95        | PLT.resultn    | =  | Missing     |                |    | 0.002331341  | 554          |     |
| TBILL.resultn | >= | 1.95        | PLT.resultn    | <  | 219         |                |    | 0.004310022  | 554          |     |
| TBILL.resultn | >= | 1.95        | PLT.resultn    | >= | 219         |                |    | 0.000847329  | 554          |     |
| TBILL.resultn | =  | Missing     |                |    |             |                |    | 0.000627006  | 555          |     |
| TBILL.resultn | <  | 2.35        | Sodium.resultn | =  | Missing     |                |    | 0            | 555          |     |
| TBILL.resultn | <  | 2.35        | Sodium.resultn | <  | 136.5       |                |    | 0.002269974  | 555          |     |
| TBILL.resultn | <  | 2.35        | Sodium.resultn | >= | 136.5       |                |    | 3.90E-06     | 555          |     |
| TBILL.resultn | >= | 2.35        | PLT.resultn    | =  | Missing     |                |    | 0.001437862  | 555          |     |
| TBILL.resultn | >= | 2.35        | PLT.resultn    | <  | 234.5       |                |    | 0.002696674  | 555          |     |
| TBILL.resultn | >= | 2.35        | PLT.resultn    | >= | 234.5       |                |    | 0.000283951  | 555          |     |
| ALK.times.uln | =  | Missing     | TBILL.resultn  | =  | Missing     |                |    | -0.000346825 | 556          |     |
| ALK.times.uln | =  | Missing     | TBILL.resultn  | <  | 1.55        |                |    | -0.001014091 | 556          |     |
| ALK.times.uln | =  | Missing     | TBILL.resultn  | >= | 1.55        |                |    | 0.002625546  | 556          |     |
| ALK.times.uln | <  | 6.02        | age.yrs        | =  | Missing     |                |    | -0.00098221  | 556          |     |
| ALK.times.uln | <  | 6.02        | age.yrs        | <  | 56.79671458 |                |    | -0.001255456 | 556          |     |
| ALK.times.uln | <  | 6.02        | age.yrs        | >= | 56.79671458 |                |    | 0            | 556          |     |
| ALK.times.uln | >= | 6.02        |                |    |             |                |    | 0.002419673  | 556          |     |
| ALK.times.uln | =  | Missing     | ALB.resultn    | =  | Missing     |                |    | -0.001631285 | 557          |     |
| ALK.times.uln | =  | Missing     | ALB.resultn    | <  | 3.75        |                |    | 0.001707035  | 557          |     |
| ALK.times.uln | =  | Missing     | ALB.resultn    | >= | 3.75        |                |    | -0.001612784 | 557          |     |
| ALK.times.uln | <  | 6.02        | TBILL.resultn  | =  | Missing     |                |    | -0.001389212 | 557          |     |
| ALK.times.uln | <  | 6.02        | TBILL.resultn  | <  | 2.75        |                |    | -0.001503514 | 557          |     |
| ALK.times.uln | <  | 6.02        | TBILL.resultn  | >= | 2.75        |                |    | 0            | 557          |     |
| ALK.times.uln | >= | 6.02        |                |    |             |                |    | 0.002233643  | 557          |     |
| age.yrs       | =  | Missing     |                |    |             | Missing        |    | -0.002001554 | 558          |     |
| age.yrs       | <  | 51.9945243  |                |    |             | Missing        |    | -0.00241565  | 558          |     |
| age.yrs       | >= | 51.9945243  | TBILL.resultn  | =  | Missing     | Missing        |    | -0.001049672 | 558          |     |
| age.yrs       | >= | 51.9945243  | TBILL.resultn  | <  | 1.65        | AST.resultn    | =  | Missing      | -0.001634497 | 558 |
| age.yrs       | >= | 51.9945243  | TBILL.resultn  | <  | 1.65        | AST.resultn    | <  | 56.5         | -0.002783063 | 558 |
| age.yrs       | >= | 51.9945243  | TBILL.resultn  | <  | 1.65        | AST.resultn    | >= | 56.5         | 0            | 558 |



|               |    |             |                |    |             |               |              |              |              |     |
|---------------|----|-------------|----------------|----|-------------|---------------|--------------|--------------|--------------|-----|
| age.yrs       | >= | 51.9945243  | TBILI.resultn  | >= | 1.65        | Missing       | 0.002634731  | 558          |              |     |
| TBILI.resultn | =  | Missing     |                |    |             | Missing       | -0.00024289  | 559          |              |     |
| TBILI.resultn | <  | 2.8         | PLT.resultn    | =  | Missing     | Missing       | -0.00027858  | 559          |              |     |
| TBILI.resultn | <  | 2.8         | PLT.resultn    | <  | 185.5       | Missing       | 0.002732416  | 559          |              |     |
| TBILI.resultn | <  | 2.8         | PLT.resultn    | >= | 185.5       | psc.yrs.dur   | =            | Missing      | 0.000225488  | 559 |
| TBILI.resultn | <  | 2.8         | PLT.resultn    | >= | 185.5       | psc.yrs.dur   | <            | 0.001368925  | 0.003438696  | 559 |
| TBILI.resultn | <  | 2.8         | PLT.resultn    | >= | 185.5       | psc.yrs.dur   | >=           | 0.001368925  | 0            | 559 |
| TBILI.resultn | >= | 2.8         |                |    |             | Missing       | 0.003534158  | 559          |              |     |
| ALK.times.uln | =  | Missing     | TBILI.resultn  | =  | Missing     |               | -0.000702243 | 560          |              |     |
| ALK.times.uln | =  | Missing     | TBILI.resultn  | <  | 1.15        |               | -0.000363596 | 560          |              |     |
| ALK.times.uln | =  | Missing     | TBILI.resultn  | >= | 1.15        |               | 0.002273817  | 560          |              |     |
| ALK.times.uln | <  | 6.02        | TBILI.resultn  | =  | Missing     |               | -0.000249968 | 560          |              |     |
| ALK.times.uln | <  | 6.02        | TBILI.resultn  | <  | 0.65        |               | -0.000681363 | 560          |              |     |
| ALK.times.uln | <  | 6.02        | TBILI.resultn  | >= | 0.65        |               | 0            | 560          |              |     |
| ALK.times.uln | >= | 6.02        |                |    |             |               | 0.002327591  | 560          |              |     |
| ALB.resultn   | =  | Missing     |                |    |             | Missing       | -0.001886403 | 561          |              |     |
| ALB.resultn   | <  | 3.105       |                |    |             | Missing       | -0.000196917 | 561          |              |     |
| ALB.resultn   | >= | 3.105       | PLT.resultn    | =  | Missing     | Missing       | -0.002777495 | 561          |              |     |
| ALB.resultn   | >= | 3.105       | PLT.resultn    | <  | 249.5       | ALK.times.uln | =            | Missing      | 0            | 561 |
| ALB.resultn   | >= | 3.105       | PLT.resultn    | <  | 249.5       | ALK.times.uln | <            | 2.85059761   | -0.002474077 | 561 |
| ALB.resultn   | >= | 3.105       | PLT.resultn    | <  | 249.5       | ALK.times.uln | >=           | 2.85059761   | 0.000283906  | 561 |
| ALB.resultn   | >= | 3.105       | PLT.resultn    | >= | 249.5       |               | Missing      | -0.002768725 | 561          |     |
| TBILI.resultn | =  | Missing     |                |    |             |               | -0.000476859 | 562          |              |     |
| TBILI.resultn | <  | 1.95        | AST.resultn    | =  | Missing     |               | -0.000490454 | 562          |              |     |
| TBILI.resultn | <  | 1.95        | AST.resultn    | <  | 43.5        |               | -0.001125816 | 562          |              |     |
| TBILI.resultn | <  | 1.95        | AST.resultn    | >= | 43.5        |               | 0            | 562          |              |     |
| TBILI.resultn | >= | 1.95        | PLT.resultn    | =  | Missing     |               | 0.000848001  | 562          |              |     |
| TBILI.resultn | >= | 1.95        | PLT.resultn    | <  | 220         |               | 0.001751006  | 562          |              |     |
| TBILI.resultn | >= | 1.95        | PLT.resultn    | >= | 220         |               | 0.000346331  | 562          |              |     |
| AST.resultn   | =  | Missing     |                |    |             | Missing       | -0.001155427 | 563          |              |     |
| AST.resultn   | <  | 52.5        |                |    |             | Missing       | -0.001045246 | 563          |              |     |
| AST.resultn   | >= | 52.5        | age.yrs        | =  | Missing     | Missing       | 0.000306776  | 563          |              |     |
| AST.resultn   | >= | 52.5        | age.yrs        | <  | 52.05065024 |               | Missing      | -0.00027037  | 563          |     |
| AST.resultn   | >= | 52.5        | age.yrs        | <  | 52.05065024 | PLT.resultn   | =            | Missing      | 0.00165345   | 563 |
| AST.resultn   | >= | 52.5        | age.yrs        | >= | 52.05065024 | PLT.resultn   | <            | 251.5        | 0.002728192  | 563 |
| AST.resultn   | >= | 52.5        | age.yrs        | >= | 52.05065024 | PLT.resultn   | >=           | 251.5        | 0            | 563 |
| PLT.resultn   | =  | Missing     |                |    |             | Missing       | -0.00010337  | 564          |              |     |
| PLT.resultn   | <  | 217.5       | TBILI.resultn  | =  | Missing     | Missing       | 0.002025319  | 564          |              |     |
| PLT.resultn   | <  | 217.5       | TBILI.resultn  | <  | 1.65        | PLT.resultn   | =            | Missing      | 0.00094      | 564 |
| PLT.resultn   | <  | 217.5       | TBILI.resultn  | <  | 1.65        | PLT.resultn   | <            | 185.5        | 0.003384002  | 564 |
| PLT.resultn   | <  | 217.5       | TBILI.resultn  | <  | 1.65        | PLT.resultn   | >=           | 185.5        | 0            | 564 |
| PLT.resultn   | <  | 217.5       | TBILI.resultn  | >= | 1.65        |               | Missing      | 0.005281276  | 564          |     |
| PLT.resultn   | >= | 217.5       |                |    |             | Missing       | 0.000253818  | 564          |              |     |
| ALK.times.uln | =  | Missing     | TBILI.resultn  | =  | Missing     |               | -0.002017157 | 565          |              |     |
| ALK.times.uln | =  | Missing     | TBILI.resultn  | <  | 1.1         |               | -0.001618355 | 565          |              |     |
| ALK.times.uln | =  | Missing     | TBILI.resultn  | >= | 1.1         |               | 0.001116709  | 565          |              |     |
| ALK.times.uln | <  | 5.462893197 | TBILI.resultn  | =  | Missing     |               | -0.001550349 | 565          |              |     |
| ALK.times.uln | <  | 5.462893197 | TBILI.resultn  | <  | 2.75        |               | -0.00167476  | 565          |              |     |
| ALK.times.uln | <  | 5.462893197 | TBILI.resultn  | >= | 2.75        |               | 0            | 565          |              |     |
| ALK.times.uln | >= | 5.462893197 |                |    |             |               | 0.0006716    | 565          |              |     |
| ALK.times.uln | =  | Missing     | Sodium.resultn | =  | Missing     |               | -0.00097925  | 566          |              |     |
| ALK.times.uln | =  | Missing     | Sodium.resultn | <  | 139.5       |               | -0.000962275 | 566          |              |     |
| ALK.times.uln | =  | Missing     | Sodium.resultn | >= | 139.5       |               | 0.001148259  | 566          |              |     |
| ALK.times.uln | <  | 6.02        | TBILI.resultn  | =  | Missing     |               | -0.000490169 | 566          |              |     |
| ALK.times.uln | <  | 6.02        | TBILI.resultn  | <  | 0.75        |               | -0.00099187  | 566          |              |     |
| ALK.times.uln | <  | 6.02        | TBILI.resultn  | >= | 0.75        |               | 0            | 566          |              |     |
| ALK.times.uln | >= | 6.02        |                |    |             |               | 0.002016306  | 566          |              |     |
| age.yrs       | =  | Missing     |                |    |             | Missing       | -0.00589208  | 567          |              |     |
| age.yrs       | <  | 51.9945243  |                |    |             | Missing       | -0.006417538 | 567          |              |     |
| age.yrs       | >= | 51.9945243  | AST.resultn    | =  | Missing     | Missing       | -0.004537732 | 567          |              |     |
| age.yrs       | >= | 51.9945243  | AST.resultn    | <  | 51.5        | Missing       | -0.006820272 | 567          |              |     |
| age.yrs       | >= | 51.9945243  | AST.resultn    | >= | 51.5        | psc.yrs.dur   | =            | Missing      | -0.002255192 | 567 |

|                |    |             |               |    |             |                    |         |             |              |     |
|----------------|----|-------------|---------------|----|-------------|--------------------|---------|-------------|--------------|-----|
| age.yrs        | >= | 51.9945243  | AST.resultn   | >= | 51.5        | psc.yrs.dur        | <       | 0.741957563 | -0.004933233 | 567 |
| age.yrs        | >= | 51.9945243  | AST.resultn   | >= | 51.5        | psc.yrs.dur        | >=      | 0.741957563 | 0            | 567 |
| TBILL.resultn  | =  | Missing     |               |    |             |                    |         |             | -0.0009448   | 568 |
| TBILL.resultn  | <  | 2.05        | ALK.times.uln | =  | Missing     |                    |         |             | 0            | 568 |
| TBILL.resultn  | <  | 2.05        | ALK.times.uln | <  | 6.644455044 |                    |         |             | -0.000710239 | 568 |
| TBILL.resultn  | <  | 2.05        | ALK.times.uln | >= | 6.644455044 |                    |         |             | 0.001805637  | 568 |
| TBILL.resultn  | >= | 2.05        | PLT.resultn   | =  | Missing     |                    |         |             | 0.001296401  | 568 |
| TBILL.resultn  | >= | 2.05        | PLT.resultn   | <  | 225.5       |                    |         |             | 0.002612658  | 568 |
| TBILL.resultn  | >= | 2.05        | PLT.resultn   | >= | 225.5       |                    |         |             | 0.000522132  | 568 |
| TBILL.resultn  | =  | Missing     |               |    |             |                    | Missing |             | -0.001962245 | 569 |
| TBILL.resultn  | <  | 0.85        |               |    |             |                    | Missing |             | -0.002433886 | 569 |
| TBILL.resultn  | >= | 0.85        | psc.yrs.dur   | =  | Missing     |                    | Missing |             | -0.000968941 | 569 |
| TBILL.resultn  | >= | 0.85        | psc.yrs.dur   | <  | 1.874058864 |                    | Missing |             | -0.001753621 | 569 |
| TBILL.resultn  | >= | 0.85        | psc.yrs.dur   | >= | 1.874058864 | Sodium.resultn     | =       | Missing     | 0            | 569 |
| TBILL.resultn  | >= | 0.85        | psc.yrs.dur   | >= | 1.874058864 | Sodium.resultn     | <       | 138.5       | 0.002174837  | 569 |
| TBILL.resultn  | >= | 0.85        | psc.yrs.dur   | >= | 1.874058864 | Sodium.resultn     | >=      | 138.5       | -0.00154605  | 569 |
| ALB.resultn    | =  | Missing     |               |    |             |                    | Missing |             | -0.003451744 | 570 |
| ALB.resultn    | <  | 2.95        |               |    |             |                    | Missing |             | -0.001114376 | 570 |
| ALB.resultn    | >= | 2.95        | TBILL.resultn | =  | Missing     |                    | Missing |             | -0.003312544 | 570 |
| ALB.resultn    | >= | 2.95        | TBILL.resultn | <  | 0.85        |                    | Missing |             | -0.004060485 | 570 |
| ALB.resultn    | >= | 2.95        | TBILL.resultn | >= | 0.85        | Hemoglobin.resultn | =       | Missing     | 0            | 570 |
| ALB.resultn    | >= | 2.95        | TBILL.resultn | >= | 0.85        | Hemoglobin.resultn | <       | 15.35       | -0.003171534 | 570 |
| ALB.resultn    | >= | 2.95        | TBILL.resultn | >= | 0.85        | Hemoglobin.resultn | >=      | 15.35       | -0.000998617 | 570 |
| ALB.resultn    | =  | Missing     |               |    |             |                    | Missing |             | -0.002347447 | 571 |
| ALB.resultn    | <  | 2.965       |               |    |             |                    | Missing |             | -8.71E-05    | 571 |
| ALB.resultn    | >= | 2.965       | age.yrs       | =  | Missing     |                    | Missing |             | -0.002557111 | 571 |
| ALB.resultn    | >= | 2.965       | age.yrs       | <  | 53.29226557 |                    | Missing |             | -0.002927312 | 571 |
| ALB.resultn    | >= | 2.965       | age.yrs       | >= | 53.29226557 | TBILL.resultn      | =       | Missing     | -0.00154225  | 571 |
| ALB.resultn    | >= | 2.965       | age.yrs       | >= | 53.29226557 | TBILL.resultn      | <       | 0.75        | -0.00325586  | 571 |
| ALB.resultn    | >= | 2.965       | age.yrs       | >= | 53.29226557 | TBILL.resultn      | >=      | 0.75        | 0            | 571 |
| age.yrs        | =  | Missing     |               |    |             |                    | Missing |             | -0.008722599 | 572 |
| age.yrs        | <  | 54.91991786 |               |    |             |                    | Missing |             | -0.009193115 | 572 |
| age.yrs        | >= | 54.91991786 | AST.resultn   | =  | Missing     |                    | Missing |             | -0.007020184 | 572 |
| age.yrs        | >= | 54.91991786 | AST.resultn   | <  | 57.5        |                    | Missing |             | -0.009202772 | 572 |
| age.yrs        | >= | 54.91991786 | AST.resultn   | >= | 57.5        | TBILL.resultn      | =       | Missing     | -0.003694337 | 572 |
| age.yrs        | >= | 54.91991786 | AST.resultn   | >= | 57.5        | TBILL.resultn      | <       | 1.25        | -0.007388673 | 572 |
| age.yrs        | >= | 54.91991786 | AST.resultn   | >= | 57.5        | TBILL.resultn      | >=      | 1.25        | 0            | 572 |
| ALB.resultn    | =  | Missing     |               |    |             |                    | Missing |             | -0.00035345  | 573 |
| ALB.resultn    | <  | 2.875       |               |    |             |                    | Missing |             | 0.003571939  | 573 |
| ALB.resultn    | >= | 2.875       | TBILL.resultn | =  | Missing     |                    | Missing |             | 0.000185741  | 573 |
| ALB.resultn    | >= | 2.875       | TBILL.resultn | <  | 0.85        |                    | Missing |             | -0.000354332 | 573 |
| ALB.resultn    | >= | 2.875       | TBILL.resultn | >= | 0.85        | PLT.resultn        | =       | Missing     | 0.000934874  | 573 |
| ALB.resultn    | >= | 2.875       | TBILL.resultn | >= | 0.85        | PLT.resultn        | <       | 248.5       | 0.002085488  | 573 |
| ALB.resultn    | >= | 2.875       | TBILL.resultn | >= | 0.85        | PLT.resultn        | >=      | 248.5       | 0            | 573 |
| Sodium.resultn | =  | Missing     |               |    |             |                    | Missing |             | 0.000343938  | 574 |
| Sodium.resultn | <  | 136.5       |               |    |             |                    | Missing |             | 0.004484669  | 574 |
| Sodium.resultn | >= | 136.5       | ALK.times.uln | =  | Missing     | ALB.resultn        | =       | Missing     | 0.001016332  | 574 |
| Sodium.resultn | >= | 136.5       | ALK.times.uln | =  | Missing     | ALB.resultn        | <       | 3.95        | 0.00242356   | 574 |
| Sodium.resultn | >= | 136.5       | ALK.times.uln | =  | Missing     | ALB.resultn        | >=      | 3.95        | 0            | 574 |
| Sodium.resultn | >= | 136.5       | ALK.times.uln | <  | 6.115825908 |                    | Missing |             | 0.000449947  | 574 |
| Sodium.resultn | >= | 136.5       | ALK.times.uln | >= | 6.115825908 |                    | Missing |             | 0.002457677  | 574 |
| age.yrs        | =  | Missing     |               |    |             |                    |         |             | 0.000875085  | 575 |
| age.yrs        | <  | 62.47091034 | ALB.resultn   | =  | Missing     |                    |         |             | 0            | 575 |
| age.yrs        | <  | 62.47091034 | ALB.resultn   | <  | 3.13        |                    |         |             | 0.00193525   | 575 |
| age.yrs        | <  | 62.47091034 | ALB.resultn   | >= | 3.13        |                    |         |             | 0.000401969  | 575 |
| age.yrs        | >= | 62.47091034 | AST.resultn   | =  | Missing     |                    |         |             | 0.003898106  | 575 |
| age.yrs        | >= | 62.47091034 | AST.resultn   | <  | 51          |                    |         |             | 1.09E-05     | 575 |
| age.yrs        | >= | 62.47091034 | AST.resultn   | >= | 51          |                    |         |             | 0.007526173  | 575 |
| ALK.times.uln  | =  | Missing     | TBILL.resultn | =  | Missing     |                    |         |             | -0.00147385  | 576 |
| ALK.times.uln  | =  | Missing     | TBILL.resultn | <  | 0.95        |                    |         |             | -0.002047014 | 576 |
| ALK.times.uln  | =  | Missing     | TBILL.resultn | >= | 0.95        |                    |         |             | 0            | 576 |
| ALK.times.uln  | <  | 4.964143426 |               |    |             |                    |         |             | -0.001496306 | 576 |

|               |    |                           |    |                         |    |         |              |     |
|---------------|----|---------------------------|----|-------------------------|----|---------|--------------|-----|
| ALK.times.uln | >= | 4.964143426 age.yrs       | =  | Missing                 |    |         | 0.000359389  | 576 |
| ALK.times.uln | >= | 4.964143426 age.yrs       | <  | 36.91444216             |    |         | -0.002050341 | 576 |
| ALK.times.uln | >= | 4.964143426 age.yrs       | >= | 36.91444216             |    |         | 0.001965876  | 576 |
| ALB.resultn   | =  | Missing                   |    |                         |    | Missing | -0.003924911 | 577 |
| ALB.resultn   | <  | 2.95                      |    |                         |    | Missing | -0.001664078 | 577 |
| ALB.resultn   | >= | 2.95 psc.yrs.dur          | =  | Missing                 |    | Missing | -0.004074918 | 577 |
| ALB.resultn   | >= | 2.95 psc.yrs.dur          | <  | 6.410677618             |    | Missing | -0.004386885 | 577 |
| ALB.resultn   | >= | 2.95 psc.yrs.dur          | >= | 6.410677618 AST.resultn | =  | Missing | -0.002344915 | 577 |
| ALB.resultn   | >= | 2.95 psc.yrs.dur          | >= | 6.410677618 AST.resultn | <  | 47.5    | -0.004836387 | 577 |
| ALB.resultn   | >= | 2.95 psc.yrs.dur          | >= | 6.410677618 AST.resultn | >= | 47.5    | 0            | 577 |
| ALB.resultn   | =  | Missing                   |    |                         |    |         | -0.003035131 | 578 |
| ALB.resultn   | <  | 3.33 psc.yrs.dur          | =  | Missing                 |    |         | -0.000280503 | 578 |
| ALB.resultn   | <  | 3.33 psc.yrs.dur          | <  | 1.549623546             |    |         | -0.002226893 | 578 |
| ALB.resultn   | <  | 3.33 psc.yrs.dur          | >= | 1.549623546             |    |         | 0.001276608  | 578 |
| ALB.resultn   | >= | 3.33 age.yrs              | =  | Missing                 |    |         | -0.002348302 | 578 |
| ALB.resultn   | >= | 3.33 age.yrs              | <  | 63.21560575             |    |         | -0.002670355 | 578 |
| ALB.resultn   | >= | 3.33 age.yrs              | >= | 63.21560575             |    |         | 0            | 578 |
| ALK.times.uln | =  | Missing TBILL.resultn     | =  | Missing                 |    | Missing | -0.001350667 | 579 |
| ALK.times.uln | =  | Missing TBILL.resultn     | <  | 0.95                    |    | Missing | -0.00135734  | 579 |
| ALK.times.uln | =  | Missing TBILL.resultn     | >= | 0.95 ALB.resultn        | =  | Missing | 0.000698654  | 579 |
| ALK.times.uln | =  | Missing TBILL.resultn     | >= | 0.95 ALB.resultn        | <  | 3.95    | 0.001280866  | 579 |
| ALK.times.uln | =  | Missing TBILL.resultn     | >= | 0.95 ALB.resultn        | >= | 3.95    | 0            | 579 |
| ALK.times.uln | <  | 5.965616681               |    |                         |    | Missing | -0.000687659 | 579 |
| ALK.times.uln | >= | 5.965616681               |    |                         |    | Missing | 0.001030844  | 579 |
| psc.yrs.dur   | =  | Missing                   |    |                         |    | Missing | -9.10E-05    | 580 |
| psc.yrs.dur   | <  | 2.038329911               |    |                         |    | Missing | -0.000618092 | 580 |
| psc.yrs.dur   | >= | 2.038329911 age.yrs       | =  | Missing                 |    | Missing | 0.001215994  | 580 |
| psc.yrs.dur   | >= | 2.038329911 age.yrs       | <  | 56.44626968 ALB.resultn | =  | Missing | 0.000563453  | 580 |
| psc.yrs.dur   | >= | 2.038329911 age.yrs       | <  | 56.44626968 ALB.resultn | <  | 3.35    | 0.00307338   | 580 |
| psc.yrs.dur   | >= | 2.038329911 age.yrs       | <  | 56.44626968 ALB.resultn | >= | 3.35    | 0            | 580 |
| psc.yrs.dur   | >= | 2.038329911 age.yrs       | >= | 56.44626968             |    | Missing | 0.004893955  | 580 |
| ALK.times.uln | =  | Missing TBILL.resultn     | =  | Missing                 |    |         | -0.001609027 | 581 |
| ALK.times.uln | =  | Missing TBILL.resultn     | <  | 1.15                    |    |         | -0.001272317 | 581 |
| ALK.times.uln | =  | Missing TBILL.resultn     | >= | 1.15                    |    |         | 0.00183411   | 581 |
| ALK.times.uln | <  | 5.446215139 TBILL.resultn | =  | Missing                 |    |         | -0.001211984 | 581 |
| ALK.times.uln | <  | 5.446215139 TBILL.resultn | <  | 2.75                    |    |         | -0.001337904 | 581 |
| ALK.times.uln | <  | 5.446215139 TBILL.resultn | >= | 2.75                    |    |         | 0            | 581 |
| ALK.times.uln | >= | 5.446215139               |    |                         |    |         | 0.001587683  | 581 |
| TBILL.resultn | =  | Missing                   |    |                         |    |         | -8.21E-05    | 582 |
| TBILL.resultn | <  | 2.05 ALK.times.uln        | =  | Missing                 |    |         | 0            | 582 |
| TBILL.resultn | <  | 2.05 ALK.times.uln        | <  | 3.635579421             |    |         | -0.000756736 | 582 |
| TBILL.resultn | <  | 2.05 ALK.times.uln        | >= | 3.635579421             |    |         | 0.001013695  | 582 |
| TBILL.resultn | >= | 2.05 psc.yrs.dur          | =  | Missing                 |    |         | 0.00109028   | 582 |
| TBILL.resultn | >= | 2.05 psc.yrs.dur          | <  | 0.438056126             |    |         | -0.000243328 | 582 |
| TBILL.resultn | >= | 2.05 psc.yrs.dur          | >= | 0.438056126             |    |         | 0.002312755  | 582 |
| ALB.resultn   | =  | Missing                   |    |                         |    |         | -0.000657696 | 583 |
| ALB.resultn   | <  | 3.31 psc.yrs.dur          | =  | Missing                 |    |         | 0.00237326   | 583 |
| ALB.resultn   | <  | 3.31 psc.yrs.dur          | <  | 2.62696783              |    |         | 0.000311423  | 583 |
| ALB.resultn   | <  | 3.31 psc.yrs.dur          | >= | 2.62696783              |    |         | 0.004950558  | 583 |
| ALB.resultn   | >= | 3.31 ALK.times.uln        | =  | Missing                 |    |         | 0            | 583 |
| ALB.resultn   | >= | 3.31 ALK.times.uln        | <  | 5.412513212             |    |         | -0.000418882 | 583 |
| ALB.resultn   | >= | 3.31 ALK.times.uln        | >= | 5.412513212             |    |         | 0.002606122  | 583 |
| ALB.resultn   | =  | Missing                   |    |                         |    | Missing | 0.00102665   | 584 |
| ALB.resultn   | <  | 3.225                     |    |                         |    | Missing | 0.002780955  | 584 |
| ALB.resultn   | >= | 3.225 TBILL.resultn       | =  | Missing                 |    | Missing | 0.000311391  | 584 |
| ALB.resultn   | >= | 3.225 TBILL.resultn       | <  | 2.05 Sodium.resultn     | =  | Missing | 0            | 584 |
| ALB.resultn   | >= | 3.225 TBILL.resultn       | <  | 2.05 Sodium.resultn     | <  | 136.5   | 0.002363907  | 584 |
| ALB.resultn   | >= | 3.225 TBILL.resultn       | <  | 2.05 Sodium.resultn     | >= | 136.5   | 8.16E-05     | 584 |
| ALB.resultn   | >= | 3.225 TBILL.resultn       | >= | 2.05                    |    | Missing | 0.001982341  | 584 |
| ALK.times.uln | =  | Missing ALB.resultn       | =  | Missing                 |    |         | -0.002601622 | 585 |
| ALK.times.uln | =  | Missing ALB.resultn       | <  | 3.95                    |    |         | 0.000913374  | 585 |
| ALK.times.uln | =  | Missing ALB.resultn       | >= | 3.95                    |    |         | -0.002580808 | 585 |

|                |    |             |                    |    |             |                    |         |             |              |     |
|----------------|----|-------------|--------------------|----|-------------|--------------------|---------|-------------|--------------|-----|
| ALK.times.uln  | <  | 5.406407841 | TBILI.resultn      | =  | Missing     |                    |         |             | -0.002235981 | 585 |
| ALK.times.uln  | <  | 5.406407841 | TBILI.resultn      | <  | 2.4         |                    |         |             | -0.002377499 | 585 |
| ALK.times.uln  | <  | 5.406407841 | TBILI.resultn      | >= | 2.4         |                    |         |             | 0            | 585 |
| ALK.times.uln  | >= | 5.406407841 |                    |    |             |                    |         |             | 0.000103606  | 585 |
| ALK.times.uln  | =  | Missing     | TBILI.resultn      | =  | Missing     |                    |         |             | -0.000723813 | 586 |
| ALK.times.uln  | =  | Missing     | TBILI.resultn      | <  | 1.15        |                    |         |             | -0.000397679 | 586 |
| ALK.times.uln  | =  | Missing     | TBILI.resultn      | >= | 1.15        |                    |         |             | 0.002139395  | 586 |
| ALK.times.uln  | <  | 5.446215139 | TBILI.resultn      | =  | Missing     |                    |         |             | -0.000319925 | 586 |
| ALK.times.uln  | <  | 5.446215139 | TBILI.resultn      | <  | 0.65        |                    |         |             | -0.000752764 | 586 |
| ALK.times.uln  | <  | 5.446215139 | TBILI.resultn      | >= | 0.65        |                    |         |             | 0            | 586 |
| ALK.times.uln  | >= | 5.446215139 |                    |    |             |                    |         |             | 0.001540728  | 586 |
| TBILI.resultn  | =  | Missing     |                    |    |             |                    | Missing |             | 0.000892888  | 587 |
| TBILI.resultn  | <  | 2.6         | age.yrs            | =  | Missing     |                    | Missing |             | -2.11E-05    | 587 |
| TBILI.resultn  | <  | 2.6         | age.yrs            | <  | 69.90965092 | ALK.times.uln      | =       | Missing     | 0            | 587 |
| TBILI.resultn  | <  | 2.6         | age.yrs            | <  | 69.90965092 | ALK.times.uln      | <       | 5.297286927 | -0.000458009 | 587 |
| TBILI.resultn  | <  | 2.6         | age.yrs            | <  | 69.90965092 | ALK.times.uln      | >=      | 5.297286927 | 0.001317649  | 587 |
| TBILI.resultn  | <  | 2.6         | age.yrs            | >= | 69.90965092 |                    |         | Missing     | 0.005495191  | 587 |
| TBILI.resultn  | >= | 2.6         |                    |    |             |                    |         | Missing     | 0.001586262  | 587 |
| ALB.resultn    | =  | Missing     |                    |    |             |                    |         | Missing     | -0.003279178 | 588 |
| ALB.resultn    | <  | 2.825       |                    |    |             |                    |         | Missing     | 0.000103975  | 588 |
| ALB.resultn    | >= | 2.825       | TBILI.resultn      | =  | Missing     |                    |         | Missing     | -0.002684378 | 588 |
| ALB.resultn    | >= | 2.825       | TBILI.resultn      | <  | 1.15        |                    |         | Missing     | -0.003054377 | 588 |
| ALB.resultn    | >= | 2.825       | TBILI.resultn      | >= | 1.15        | Hemoglobin.resultn | =       | Missing     | 0            | 588 |
| ALB.resultn    | >= | 2.825       | TBILI.resultn      | >= | 1.15        | Hemoglobin.resultn | <       | 12.9        | -0.000765513 | 588 |
| ALB.resultn    | >= | 2.825       | TBILI.resultn      | >= | 1.15        | Hemoglobin.resultn | >=      | 12.9        | -0.002936564 | 588 |
| ALB.resultn    | =  | Missing     |                    |    |             |                    |         |             | -0.000956944 | 589 |
| ALB.resultn    | <  | 3.34        | TBILI.resultn      | =  | Missing     |                    |         |             | 0.001537917  | 589 |
| ALB.resultn    | <  | 3.34        | TBILI.resultn      | <  | 1.31        |                    |         |             | -0.000567421 | 589 |
| ALB.resultn    | <  | 3.34        | TBILI.resultn      | >= | 1.31        |                    |         |             | 0.00345186   | 589 |
| ALB.resultn    | >= | 3.34        | ALK.times.uln      | =  | Missing     |                    |         |             | 0            | 589 |
| ALB.resultn    | >= | 3.34        | ALK.times.uln      | <  | 2.81254114  |                    |         |             | -0.001365296 | 589 |
| ALB.resultn    | >= | 3.34        | ALK.times.uln      | >= | 2.81254114  |                    |         |             | 0.000152419  | 589 |
| ALK.times.uln  | =  | Missing     | TBILI.resultn      | =  | Missing     |                    |         |             | -0.004493426 | 590 |
| ALK.times.uln  | =  | Missing     | TBILI.resultn      | <  | 1.15        |                    |         |             | -0.005300216 | 590 |
| ALK.times.uln  | =  | Missing     | TBILI.resultn      | >= | 1.15        |                    |         |             | -0.002288199 | 590 |
| ALK.times.uln  | <  | 5.857962963 | age.yrs            | =  | Missing     |                    |         |             | -0.004520913 | 590 |
| ALK.times.uln  | <  | 5.857962963 | age.yrs            | <  | 69.84257358 |                    |         |             | -0.004788422 | 590 |
| ALK.times.uln  | <  | 5.857962963 | age.yrs            | >= | 69.84257358 |                    |         |             | 0            | 590 |
| ALK.times.uln  | >= | 5.857962963 |                    |    |             |                    |         |             | -0.002360312 | 590 |
| psc.yrs.dur    | =  | Missing     |                    |    |             |                    |         | Missing     | 0.000815475  | 591 |
| psc.yrs.dur    | <  | 1.360711841 |                    |    |             |                    |         | Missing     | 0.000410462  | 591 |
| psc.yrs.dur    | >= | 1.360711841 | TBILI.resultn      | =  | Missing     |                    |         | Missing     | 0.001635143  | 591 |
| psc.yrs.dur    | >= | 1.360711841 | TBILI.resultn      | <  | 2.2         | Sodium.resultn     | =       | Missing     | 0            | 591 |
| psc.yrs.dur    | >= | 1.360711841 | TBILI.resultn      | <  | 2.2         | Sodium.resultn     | <       | 138.5       | 0.004402988  | 591 |
| psc.yrs.dur    | >= | 1.360711841 | TBILI.resultn      | <  | 2.2         | Sodium.resultn     | >=      | 138.5       | 0.000831455  | 591 |
| psc.yrs.dur    | >= | 1.360711841 | TBILI.resultn      | >= | 2.2         |                    |         | Missing     | 0.00304313   | 591 |
| ALB.resultn    | =  | Missing     |                    |    |             |                    |         | Missing     | 9.24E-05     | 592 |
| ALB.resultn    | <  | 2.915       |                    |    |             |                    |         | Missing     | 0.002844185  | 592 |
| ALB.resultn    | >= | 2.915       | TBILI.resultn      | =  | Missing     |                    |         | Missing     | 0.000164736  | 592 |
| ALB.resultn    | >= | 2.915       | TBILI.resultn      | <  | 0.75        |                    |         | Missing     | -0.000592649 | 592 |
| ALB.resultn    | >= | 2.915       | TBILI.resultn      | >= | 0.75        | AST.resultn        | =       | Missing     | 0.001016794  | 592 |
| ALB.resultn    | >= | 2.915       | TBILI.resultn      | >= | 0.75        | AST.resultn        | <       | 72.5        | 0.002094595  | 592 |
| ALB.resultn    | >= | 2.915       | TBILI.resultn      | >= | 0.75        | AST.resultn        | >=      | 72.5        | 0            | 592 |
| ALB.resultn    | =  | Missing     |                    |    |             |                    |         |             | -0.001969446 | 593 |
| ALB.resultn    | <  | 3.31        | psc.yrs.dur        | =  | Missing     |                    |         |             | 0.000832668  | 593 |
| ALB.resultn    | <  | 3.31        | psc.yrs.dur        | <  | 1.70294319  |                    |         |             | -0.001414494 | 593 |
| ALB.resultn    | <  | 3.31        | psc.yrs.dur        | >= | 1.70294319  |                    |         |             | 0.003641621  | 593 |
| ALB.resultn    | >= | 3.31        | Hemoglobin.resultn | =  | Missing     |                    |         |             | 0            | 593 |
| ALB.resultn    | >= | 3.31        | Hemoglobin.resultn | <  | 12.95       |                    |         |             | -0.001253433 | 593 |
| ALB.resultn    | >= | 3.31        | Hemoglobin.resultn | >= | 12.95       |                    |         |             | -0.001990453 | 593 |
| Sodium.resultn | =  | Missing     |                    |    |             |                    |         | Missing     | -0.003095676 | 594 |
| Sodium.resultn | <  | 136.5       |                    |    |             |                    |         | Missing     | -0.000993217 | 594 |

|                |    |             |                    |    |             |               |              |             |              |     |
|----------------|----|-------------|--------------------|----|-------------|---------------|--------------|-------------|--------------|-----|
| Sodium.resultn | >= | 136.5       | PLT.resultn        | =  | Missing     | Missing       | -0.002702151 | 594         |              |     |
| Sodium.resultn | >= | 136.5       | PLT.resultn        | <  | 249.5       | ALK.times.uln | =            | Missing     | 0            | 594 |
| Sodium.resultn | >= | 136.5       | PLT.resultn        | <  | 249.5       | ALK.times.uln | <            | 2.847269043 | -0.003109854 | 594 |
| Sodium.resultn | >= | 136.5       | PLT.resultn        | <  | 249.5       | ALK.times.uln | >=           | 2.847269043 | -0.000345113 | 594 |
| Sodium.resultn | >= | 136.5       | PLT.resultn        | >= | 249.5       |               |              | Missing     | -0.003350282 | 594 |
| TBILI.resultn  | =  | Missing     |                    |    |             |               |              | Missing     | -0.000854948 | 595 |
| TBILI.resultn  | <  | 0.85        |                    |    |             |               |              | Missing     | -0.0007182   | 595 |
| TBILI.resultn  | >= | 0.85        | Hemoglobin.resultn | =  | Missing     |               |              | Missing     | 0.002595037  | 595 |
| TBILI.resultn  | >= | 0.85        | Hemoglobin.resultn | <  | 13.75       | PLT.resultn   | =            | Missing     | 0.000489129  | 595 |
| TBILI.resultn  | >= | 0.85        | Hemoglobin.resultn | <  | 13.75       | PLT.resultn   | <            | 249.5       | 0.001730765  | 595 |
| TBILI.resultn  | >= | 0.85        | Hemoglobin.resultn | <  | 13.75       | PLT.resultn   | >=           | 249.5       | 0            | 595 |
| TBILI.resultn  | >= | 0.85        | Hemoglobin.resultn | >= | 13.75       |               |              | Missing     | -0.000225225 | 595 |
| TBILI.resultn  | =  | Missing     |                    |    |             |               |              |             | 0.000750953  | 596 |
| TBILI.resultn  | <  | 2.45        | age.yrs            | =  | Missing     |               |              |             | -0.00120179  | 596 |
| TBILI.resultn  | <  | 2.45        | age.yrs            | <  | 53.64681725 |               |              |             | -0.001698014 | 596 |
| TBILI.resultn  | <  | 2.45        | age.yrs            | >= | 53.64681725 |               |              |             | 0            | 596 |
| TBILI.resultn  | >= | 2.45        | age.yrs            | =  | Missing     |               |              |             | -0.000398994 | 596 |
| TBILI.resultn  | >= | 2.45        | age.yrs            | <  | 46.09034908 |               |              |             | -0.001803767 | 596 |
| TBILI.resultn  | >= | 2.45        | age.yrs            | >= | 46.09034908 |               |              |             | 0.000878073  | 596 |
| ALB.resultn    | =  | Missing     |                    |    |             |               |              | Missing     | -0.002852114 | 597 |
| ALB.resultn    | <  | 2.95        |                    |    |             |               |              | Missing     | -3.05E-05    | 597 |
| ALB.resultn    | >= | 2.95        | TBILI.resultn      | =  | Missing     |               |              | Missing     | -0.003501821 | 597 |
| ALB.resultn    | >= | 2.95        | TBILI.resultn      | <  | 0.95        |               |              | Missing     | -0.004024544 | 597 |
| ALB.resultn    | >= | 2.95        | TBILI.resultn      | >= | 0.95        | psc.yrs.dur   | =            | Missing     | -0.00253891  | 597 |
| ALB.resultn    | >= | 2.95        | TBILI.resultn      | >= | 0.95        | psc.yrs.dur   | <            | 6.783025325 | -0.003014956 | 597 |
| ALB.resultn    | >= | 2.95        | TBILI.resultn      | >= | 0.95        | psc.yrs.dur   | >=           | 6.783025325 | 0            | 597 |
| TBILI.resultn  | =  | Missing     |                    |    |             |               |              |             | 0.000907156  | 598 |
| TBILI.resultn  | <  | 2.05        | Hemoglobin.resultn | =  | Missing     |               |              |             | 0            | 598 |
| TBILI.resultn  | <  | 2.05        | Hemoglobin.resultn | <  | 11.2        |               |              |             | 0.002922549  | 598 |
| TBILI.resultn  | <  | 2.05        | Hemoglobin.resultn | >= | 11.2        |               |              |             | 1.76E-06     | 598 |
| TBILI.resultn  | >= | 2.05        | Hemoglobin.resultn | =  | Missing     |               |              |             | 0.001046285  | 598 |
| TBILI.resultn  | >= | 2.05        | Hemoglobin.resultn | <  | 13          |               |              |             | 0.002712206  | 598 |
| TBILI.resultn  | >= | 2.05        | Hemoglobin.resultn | >= | 13          |               |              |             | -0.000468188 | 598 |
| ALK.times.uln  | =  | Missing     | age.yrs            | =  | Missing     |               |              | Missing     | -0.003418502 | 599 |
| ALK.times.uln  | =  | Missing     | age.yrs            | <  | 53.32648871 |               |              | Missing     | -0.004093934 | 599 |
| ALK.times.uln  | =  | Missing     | age.yrs            | >= | 53.32648871 | AST.resultn   | =            | Missing     | -0.002035475 | 599 |
| ALK.times.uln  | =  | Missing     | age.yrs            | >= | 53.32648871 | AST.resultn   | <            | 46.5        | -0.00407095  | 599 |
| ALK.times.uln  | =  | Missing     | age.yrs            | >= | 53.32648871 | AST.resultn   | >=           | 46.5        | 0            | 599 |
| ALK.times.uln  | <  | 6.02        |                    |    |             |               |              | Missing     | -0.003520189 | 599 |
| ALK.times.uln  | >= | 6.02        |                    |    |             |               |              | Missing     | -0.0007307   | 599 |
| ALB.resultn    | =  | Missing     |                    |    |             |               |              | Missing     | -0.001822332 | 600 |
| ALB.resultn    | <  | 2.915       |                    |    |             |               |              | Missing     | 0.001545511  | 600 |
| ALB.resultn    | >= | 2.915       | PLT.resultn        | =  | Missing     |               |              | Missing     | -0.001229696 | 600 |
| ALB.resultn    | >= | 2.915       | PLT.resultn        | <  | 249.5       | ALK.times.uln | =            | Missing     | 0            | 600 |
| ALB.resultn    | >= | 2.915       | PLT.resultn        | <  | 249.5       | ALK.times.uln | <            | 2.905037968 | -0.001898544 | 600 |
| ALB.resultn    | >= | 2.915       | PLT.resultn        | <  | 249.5       | ALK.times.uln | >=           | 2.905037968 | 0.000520931  | 600 |
| ALB.resultn    | >= | 2.915       | PLT.resultn        | >= | 249.5       |               |              | Missing     | -0.002232453 | 600 |
| ALB.resultn    | =  | Missing     |                    |    |             |               |              |             | -0.002307617 | 601 |
| ALB.resultn    | <  | 3.105       | psc.yrs.dur        | =  | Missing     |               |              |             | -0.000724978 | 601 |
| ALB.resultn    | <  | 3.105       | psc.yrs.dur        | <  | 1.004791239 |               |              |             | -0.001384048 | 601 |
| ALB.resultn    | <  | 3.105       | psc.yrs.dur        | >= | 1.004791239 |               |              |             | 0            | 601 |
| ALB.resultn    | >= | 3.105       | PLT.resultn        | =  | Missing     |               |              |             | -0.003066888 | 601 |
| ALB.resultn    | >= | 3.105       | PLT.resultn        | <  | 197.5       |               |              |             | 6.44E-05     | 601 |
| ALB.resultn    | >= | 3.105       | PLT.resultn        | >= | 197.5       |               |              |             | -0.002609865 | 601 |
| age.yrs        | =  | Missing     |                    |    |             |               |              | Missing     | -0.001700744 | 602 |
| age.yrs        | <  | 49.41957563 |                    |    |             |               |              | Missing     | -0.002188909 | 602 |
| age.yrs        | >= | 49.41957563 | ALB.resultn        | =  | Missing     |               |              | Missing     | -0.000763691 | 602 |
| age.yrs        | >= | 49.41957563 | ALB.resultn        | <  | 3.31        |               |              | Missing     | 0.001014287  | 602 |
| age.yrs        | >= | 49.41957563 | ALB.resultn        | >= | 3.31        | TBILI.resultn | =            | Missing     | -0.001010633 | 602 |
| age.yrs        | >= | 49.41957563 | ALB.resultn        | >= | 3.31        | TBILI.resultn | <            | 0.75        | -0.002474308 | 602 |
| age.yrs        | >= | 49.41957563 | ALB.resultn        | >= | 3.31        | TBILI.resultn | >=           | 0.75        | 0            | 602 |
| Sodium.resultn | =  | Missing     |                    |    |             |               |              | Missing     | -0.002172094 | 603 |

|                |    |             |                    |    |             |                    |             |             |              |     |
|----------------|----|-------------|--------------------|----|-------------|--------------------|-------------|-------------|--------------|-----|
| Sodium.resultn | <  | 136.5       |                    |    |             | Missing            | 0.001211433 | 603         |              |     |
| Sodium.resultn | >= | 136.5       | ALK.times.uln      | =  | Missing     | age.yrs            | =           | Missing     | -0.00191289  | 603 |
| Sodium.resultn | >= | 136.5       | ALK.times.uln      | =  | Missing     | age.yrs            | <           | 54.78439425 | -0.002744582 | 603 |
| Sodium.resultn | >= | 136.5       | ALK.times.uln      | =  | Missing     | age.yrs            | >=          | 54.78439425 | 0            | 603 |
| Sodium.resultn | >= | 136.5       | ALK.times.uln      | <  | 6.02173913  |                    |             | Missing     | -0.002591028 | 603 |
| Sodium.resultn | >= | 136.5       | ALK.times.uln      | >= | 6.02173913  |                    |             | Missing     | -0.000728615 | 603 |
| TBILL.resultn  | =  | Missing     |                    |    |             |                    |             | Missing     | -0.000684188 | 604 |
| TBILL.resultn  | <  | 0.95        |                    |    |             |                    |             | Missing     | -0.001696886 | 604 |
| TBILL.resultn  | >= | 0.95        | Hemoglobin.resultn | =  | Missing     | ALB.resultn        | =           | Missing     | 0.001458772  | 604 |
| TBILL.resultn  | >= | 0.95        | Hemoglobin.resultn | =  | Missing     | ALB.resultn        | <           | 3.95        | 0.003315392  | 604 |
| TBILL.resultn  | >= | 0.95        | Hemoglobin.resultn | =  | Missing     | ALB.resultn        | >=          | 3.95        | 0            | 604 |
| TBILL.resultn  | >= | 0.95        | Hemoglobin.resultn | <  | 13.75       |                    |             | Missing     | 0.00033149   | 604 |
| TBILL.resultn  | >= | 0.95        | Hemoglobin.resultn | >= | 13.75       |                    |             | Missing     | -0.001190666 | 604 |
| age.yrs        | =  | Missing     |                    |    |             |                    |             | Missing     | -0.000317061 | 605 |
| age.yrs        | <  | 51.63175907 |                    |    |             |                    |             | Missing     | -0.000587531 | 605 |
| age.yrs        | >= | 51.63175907 | AST.resultn        | =  | Missing     |                    |             | Missing     | 0.000316409  | 605 |
| age.yrs        | >= | 51.63175907 | AST.resultn        | <  | 49.5        |                    |             | Missing     | -0.001057943 | 605 |
| age.yrs        | >= | 51.63175907 | AST.resultn        | >= | 49.5        | PLT.resultn        | =           | Missing     | 0.001728937  | 605 |
| age.yrs        | >= | 51.63175907 | AST.resultn        | >= | 49.5        | PLT.resultn        | <           | 254.5       | 0.002420512  | 605 |
| age.yrs        | >= | 51.63175907 | AST.resultn        | >= | 49.5        | PLT.resultn        | >=          | 254.5       | 0            | 605 |
| age.yrs        | =  | Missing     |                    |    |             |                    |             | Missing     | -0.001085143 | 606 |
| age.yrs        | <  | 69.84257358 | ALK.times.uln      | =  | Missing     |                    |             | Missing     | -0.001158634 | 606 |
| age.yrs        | <  | 69.84257358 | ALK.times.uln      | <  | 5.446215139 | TBILL.resultn      | =           | Missing     | -0.001637788 | 606 |
| age.yrs        | <  | 69.84257358 | ALK.times.uln      | <  | 5.446215139 | TBILL.resultn      | <           | 2.5         | -0.001746974 | 606 |
| age.yrs        | <  | 69.84257358 | ALK.times.uln      | <  | 5.446215139 | TBILL.resultn      | >=          | 2.5         | 0            | 606 |
| age.yrs        | <  | 69.84257358 | ALK.times.uln      | >= | 5.446215139 |                    |             | Missing     | 0.000140048  | 606 |
| age.yrs        | >= | 69.84257358 |                    |    |             |                    |             | Missing     | 0.004769327  | 606 |
| ALB.resultn    | =  | Missing     |                    |    |             |                    |             | Missing     | -0.003817922 | 607 |
| ALB.resultn    | <  | 2.95        |                    |    |             |                    |             | Missing     | -0.001198009 | 607 |
| ALB.resultn    | >= | 2.95        | TBILL.resultn      | =  | Missing     |                    |             | Missing     | -0.003805162 | 607 |
| ALB.resultn    | >= | 2.95        | TBILL.resultn      | <  | 1.15        |                    |             | Missing     | -0.004153391 | 607 |
| ALB.resultn    | >= | 2.95        | TBILL.resultn      | >= | 1.15        | Hemoglobin.resultn | =           | Missing     | 0            | 607 |
| ALB.resultn    | >= | 2.95        | TBILL.resultn      | >= | 1.15        | Hemoglobin.resultn | <           | 13.75       | -0.002770654 | 607 |
| ALB.resultn    | >= | 2.95        | TBILL.resultn      | >= | 1.15        | Hemoglobin.resultn | >=          | 13.75       | -0.003988291 | 607 |
| PLT.resultn    | =  | Missing     |                    |    |             |                    |             |             | -0.002735594 | 608 |
| PLT.resultn    | <  | 197.5       | ALB.resultn        | =  | Missing     |                    |             |             | -2.84E-05    | 608 |
| PLT.resultn    | <  | 197.5       | ALB.resultn        | <  | 3.9         |                    |             |             | 0.001927569  | 608 |
| PLT.resultn    | <  | 197.5       | ALB.resultn        | >= | 3.9         |                    |             |             | -0.001984286 | 608 |
| PLT.resultn    | >= | 197.5       | age.yrs            | =  | Missing     |                    |             |             | -0.003216209 | 608 |
| PLT.resultn    | >= | 197.5       | age.yrs            | <  | 69.84257358 |                    |             |             | -0.003419338 | 608 |
| PLT.resultn    | >= | 197.5       | age.yrs            | >= | 69.84257358 |                    |             |             | 0            | 608 |
| ALB.resultn    | =  | Missing     |                    |    |             |                    |             |             | -0.00031622  | 609 |
| ALB.resultn    | <  | 3.31        | TBILL.resultn      | =  | Missing     |                    |             |             | 0.001003858  | 609 |
| ALB.resultn    | <  | 3.31        | TBILL.resultn      | <  | 1.31        |                    |             |             | -0.000184776 | 609 |
| ALB.resultn    | <  | 3.31        | TBILL.resultn      | >= | 1.31        |                    |             |             | 0.001954764  | 609 |
| ALB.resultn    | >= | 3.31        | TBILL.resultn      | =  | Missing     |                    |             |             | -0.000595168 | 609 |
| ALB.resultn    | >= | 3.31        | TBILL.resultn      | <  | 0.85        |                    |             |             | -0.001032328 | 609 |
| ALB.resultn    | >= | 3.31        | TBILL.resultn      | >= | 0.85        |                    |             |             | 0            | 609 |
| ALB.resultn    | =  | Missing     |                    |    |             |                    |             | Missing     | -0.001684238 | 610 |
| ALB.resultn    | <  | 3.245       |                    |    |             |                    |             | Missing     | -0.000330438 | 610 |
| ALB.resultn    | >= | 3.245       | TBILL.resultn      | =  | Missing     |                    |             | Missing     | -0.002661301 | 610 |
| ALB.resultn    | >= | 3.245       | TBILL.resultn      | <  | 0.75        |                    |             | Missing     | -0.003233081 | 610 |
| ALB.resultn    | >= | 3.245       | TBILL.resultn      | >= | 0.75        | age.yrs            | =           | Missing     | -0.002100412 | 610 |
| ALB.resultn    | >= | 3.245       | TBILL.resultn      | >= | 0.75        | age.yrs            | <           | 51.76180698 | -0.00302114  | 610 |
| ALB.resultn    | >= | 3.245       | TBILL.resultn      | >= | 0.75        | age.yrs            | >=          | 51.76180698 | 0            | 610 |
| ALK.times.uln  | =  | Missing     | ALB.resultn        | =  | Missing     |                    |             |             | -0.001502034 | 611 |
| ALK.times.uln  | =  | Missing     | ALB.resultn        | <  | 3.95        |                    |             |             | 0.001721231  | 611 |
| ALK.times.uln  | =  | Missing     | ALB.resultn        | >= | 3.95        |                    |             |             | -0.001496635 | 611 |
| ALK.times.uln  | <  | 5.446215139 | age.yrs            | =  | Missing     |                    |             |             | -0.000968426 | 611 |
| ALK.times.uln  | <  | 5.446215139 | age.yrs            | <  | 51.58521561 |                    |             |             | -0.001388362 | 611 |
| ALK.times.uln  | <  | 5.446215139 | age.yrs            | >= | 51.58521561 |                    |             |             | 0            | 611 |
| ALK.times.uln  | >= | 5.446215139 |                    |    |             |                    |             |             | 0.00176355   | 611 |

|               |    |                            |               |                         |             |             |         |  |  |              |     |
|---------------|----|----------------------------|---------------|-------------------------|-------------|-------------|---------|--|--|--------------|-----|
| ALB.resultn   | =  | Missing                    |               |                         |             |             |         |  |  | -0.000506711 | 612 |
| ALB.resultn   | <  | 3.31 psc.yrs.dur           | =             | Missing                 |             |             |         |  |  | 0.00125972   | 612 |
| ALB.resultn   | <  | 3.31 psc.yrs.dur           | <             | 0.735112936             |             |             |         |  |  | -0.000619837 | 612 |
| ALB.resultn   | <  | 3.31 psc.yrs.dur           | >=            | 0.735112936             |             |             |         |  |  | 0.002512758  | 612 |
| ALB.resultn   | >= | 3.31 TBILL.resultn         | =             | Missing                 |             |             |         |  |  | -0.001124674 | 612 |
| ALB.resultn   | >= | 3.31 TBILL.resultn         | <             | 1.65                    |             |             |         |  |  | -0.001263679 | 612 |
| ALB.resultn   | >= | 3.31 TBILL.resultn         | >=            | 1.65                    |             |             |         |  |  | 0            | 612 |
| TBILL.resultn | =  | Missing                    |               |                         |             |             |         |  |  | -0.00024307  | 613 |
| TBILL.resultn | <  | 1.55 Sodium.resultn        | =             | Missing                 |             |             |         |  |  | 0            | 613 |
| TBILL.resultn | <  | 1.55 Sodium.resultn        | <             | 142.5                   |             |             |         |  |  | 0.00030215   | 613 |
| TBILL.resultn | <  | 1.55 Sodium.resultn        | >=            | 142.5                   |             |             |         |  |  | 0.001779045  | 613 |
| TBILL.resultn | >= | 1.55 age.yrs               | =             | Missing                 |             |             |         |  |  | 0.001622879  | 613 |
| TBILL.resultn | >= | 1.55 age.yrs               | <             | 51.10746064             |             |             |         |  |  | 0.000680139  | 613 |
| TBILL.resultn | >= | 1.55 age.yrs               | >=            | 51.10746064             |             |             |         |  |  | 0.00309591   | 613 |
| TBILL.resultn | =  | Missing                    |               |                         |             |             |         |  |  | -0.003245586 | 614 |
| TBILL.resultn | <  | 1.65 age.yrs               | =             | Missing                 |             |             |         |  |  | -0.003847906 | 614 |
| TBILL.resultn | <  | 1.65 age.yrs               | <             | 69.84257358             |             |             |         |  |  | -0.004068359 | 614 |
| TBILL.resultn | <  | 1.65 age.yrs               | >=            | 69.84257358             |             |             |         |  |  | 0            | 614 |
| TBILL.resultn | >= | 1.65 Hemoglobin.resultn    | =             | Missing                 |             |             |         |  |  | -0.002934927 | 614 |
| TBILL.resultn | >= | 1.65 Hemoglobin.resultn    | <             | 12.75                   |             |             |         |  |  | -0.001734976 | 614 |
| TBILL.resultn | >= | 1.65 Hemoglobin.resultn    | >=            | 12.75                   |             |             |         |  |  | -0.004434866 | 614 |
| ALK.times.uln | =  | Missing                    | ALB.resultn   | =                       | Missing     |             |         |  |  | 0            | 615 |
| ALK.times.uln | =  | Missing                    | ALB.resultn   | <                       | 3.95        |             |         |  |  | 0.002776906  | 615 |
| ALK.times.uln | =  | Missing                    | ALB.resultn   | >=                      | 3.95        |             |         |  |  | 3.48E-05     | 615 |
| ALK.times.uln | <  | 4.957249264                |               |                         |             |             |         |  |  | 0.000414079  | 615 |
| ALK.times.uln | >= | 4.957249264 age.yrs        | =             | Missing                 |             |             |         |  |  | 0.00313294   | 615 |
| ALK.times.uln | >= | 4.957249264 age.yrs        | <             | 36.63791923             |             |             |         |  |  | 0.001095468  | 615 |
| ALK.times.uln | >= | 4.957249264 age.yrs        | >=            | 36.63791923             |             |             |         |  |  | 0.005013684  | 615 |
| ALB.resultn   | =  | Missing                    |               |                         |             | Missing     |         |  |  | -0.004149329 | 616 |
| ALB.resultn   | <  | 3.15                       |               |                         |             | Missing     |         |  |  | -0.00222931  | 616 |
| ALB.resultn   | >= | 3.15 PLT.resultn           | =             | Missing                 |             | Missing     |         |  |  | -0.003984363 | 616 |
| ALB.resultn   | >= | 3.15 PLT.resultn           | <             | 210 ALK.times.uln       | =           | Missing     |         |  |  | -0.003123485 | 616 |
| ALB.resultn   | >= | 3.15 PLT.resultn           | <             | 210 ALK.times.uln       | <           | 2.125523013 |         |  |  | -0.004685227 | 616 |
| ALB.resultn   | >= | 3.15 PLT.resultn           | <             | 210 ALK.times.uln       | >=          | 2.125523013 |         |  |  | 0            | 616 |
| ALB.resultn   | >= | 3.15 PLT.resultn           | >=            | 210                     |             | Missing     |         |  |  | -0.004431186 | 616 |
| ALK.times.uln | =  | Missing                    | TBILL.resultn | =                       | Missing     |             |         |  |  | 0            | 617 |
| ALK.times.uln | =  | Missing                    | TBILL.resultn | <                       | 1.15        |             |         |  |  | 0.000341409  | 617 |
| ALK.times.uln | =  | Missing                    | TBILL.resultn | >=                      | 1.15        |             |         |  |  | 0.002329266  | 617 |
| ALK.times.uln | <  | 5.438574341                |               |                         |             |             |         |  |  | 0.000574887  | 617 |
| ALK.times.uln | >= | 5.438574341 ALK.times.uln  | =             | Missing                 |             |             |         |  |  | 0.002425266  | 617 |
| ALK.times.uln | >= | 5.438574341 ALK.times.uln  | <             | 7.801810865             |             |             |         |  |  | 0.004236618  | 617 |
| ALK.times.uln | >= | 5.438574341 ALK.times.uln  | >=            | 7.801810865             |             |             |         |  |  | 0.000915807  | 617 |
| ALB.resultn   | =  | Missing                    |               |                         |             | Missing     |         |  |  | -0.003467923 | 618 |
| ALB.resultn   | <  | 3.03                       |               |                         |             | Missing     |         |  |  | 0.000693309  | 618 |
| ALB.resultn   | >= | 3.03 TBILL.resultn         | =             | Missing                 |             | Missing     |         |  |  | -0.002888352 | 618 |
| ALB.resultn   | >= | 3.03 TBILL.resultn         | <             | 0.85                    |             | Missing     |         |  |  | -0.003475229 | 618 |
| ALB.resultn   | >= | 3.03 TBILL.resultn         | >=            | 0.85 Hemoglobin.resultn | =           | Missing     |         |  |  | 0            | 618 |
| ALB.resultn   | >= | 3.03 TBILL.resultn         | >=            | 0.85 Hemoglobin.resultn | <           | 13.75       |         |  |  | -0.001520694 | 618 |
| ALB.resultn   | >= | 3.03 TBILL.resultn         | >=            | 0.85 Hemoglobin.resultn | >=          | 13.75       |         |  |  | -0.003112197 | 618 |
| ALB.resultn   | =  | Missing                    |               |                         |             | Missing     |         |  |  | 0.000396913  | 619 |
| ALB.resultn   | <  | 2.915                      |               |                         |             | Missing     |         |  |  | 0.003234298  | 619 |
| ALB.resultn   | >= | 2.915 ALK.times.uln        | =             | Missing                 | PLT.resultn | =           | Missing |  |  | 0.001378925  | 619 |
| ALB.resultn   | >= | 2.915 ALK.times.uln        | =             | Missing                 | PLT.resultn | <           | 246     |  |  | 0.002637943  | 619 |
| ALB.resultn   | >= | 2.915 ALK.times.uln        | =             | Missing                 | PLT.resultn | >=          | 246     |  |  | 0            | 619 |
| ALB.resultn   | >= | 2.915 ALK.times.uln        | <             | 5.438574341             |             | Missing     |         |  |  | 0.000290814  | 619 |
| ALB.resultn   | >= | 2.915 ALK.times.uln        | >=            | 5.438574341             |             | Missing     |         |  |  | 0.002073293  | 619 |
| age.yrs       | =  | Missing                    |               |                         |             | Missing     |         |  |  | -0.000412896 | 620 |
| age.yrs       | <  | 69.76043806 Sodium.resultn | =             | Missing                 |             | Missing     |         |  |  | -0.000902583 | 620 |
| age.yrs       | <  | 69.76043806 Sodium.resultn | <             | 136.5                   |             | Missing     |         |  |  | 0.001835235  | 620 |
| age.yrs       | <  | 69.76043806 Sodium.resultn | >=            | 136.5 ALK.times.uln     | =           | Missing     |         |  |  | 0            | 620 |
| age.yrs       | <  | 69.76043806 Sodium.resultn | >=            | 136.5 ALK.times.uln     | <           | 5.728910445 |         |  |  | -0.001048569 | 620 |
| age.yrs       | <  | 69.76043806 Sodium.resultn | >=            | 136.5 ALK.times.uln     | >=          | 5.728910445 |         |  |  | 0.000683072  | 620 |

|               |    |             |                    |    |             |               |              |              |              |     |
|---------------|----|-------------|--------------------|----|-------------|---------------|--------------|--------------|--------------|-----|
| age.yrs       | >= | 69.76043806 |                    |    |             | Missing       | 0.003263916  | 620          |              |     |
| age.yrs       | =  | Missing     |                    |    |             | Missing       | -0.000454315 | 621          |              |     |
| age.yrs       | <  | 51.92060233 |                    |    |             | Missing       | -0.000816616 | 621          |              |     |
| age.yrs       | >= | 51.92060233 | TBILL.resultn      | =  | Missing     | Missing       | 0.000461503  | 621          |              |     |
| age.yrs       | >= | 51.92060233 | TBILL.resultn      | <  | 1.31        | ALB.resultn   | =            | Missing      | -0.000316926 | 621 |
| age.yrs       | >= | 51.92060233 | TBILL.resultn      | <  | 1.31        | ALB.resultn   | <            | 3.85         | -0.001199792 | 621 |
| age.yrs       | >= | 51.92060233 | TBILL.resultn      | <  | 1.31        | ALB.resultn   | >=           | 3.85         | 0            | 621 |
| age.yrs       | >= | 51.92060233 | TBILL.resultn      | >= | 1.31        |               | Missing      | 0.003088701  | 621          |     |
| age.yrs       | =  | Missing     |                    |    |             | Missing       | -0.001701776 | 622          |              |     |
| age.yrs       | <  | 51.63175907 |                    |    |             | Missing       | -0.002085573 | 622          |              |     |
| age.yrs       | >= | 51.63175907 | AST.resultn        | =  | Missing     | Missing       | -0.000965062 | 622          |              |     |
| age.yrs       | >= | 51.63175907 | AST.resultn        | <  | 51.5        |               | Missing      | -0.002546632 | 622          |     |
| age.yrs       | >= | 51.63175907 | AST.resultn        | >= | 51.5        | ALB.resultn   | =            | Missing      | 0.000655083  | 622 |
| age.yrs       | >= | 51.63175907 | AST.resultn        | >= | 51.5        | ALB.resultn   | <            | 3.645        | 0.002322566  | 622 |
| age.yrs       | >= | 51.63175907 | AST.resultn        | >= | 51.5        | ALB.resultn   | >=           | 3.645        | 0            | 622 |
| TBILL.resultn | =  | Missing     |                    |    |             | Missing       | -0.006073257 | 623          |              |     |
| TBILL.resultn | <  | 0.95        |                    |    |             | Missing       | -0.006066993 | 623          |              |     |
| TBILL.resultn | >= | 0.95        | Hemoglobin.resultn | =  | Missing     | age.yrs       | =            | Missing      | -0.002557863 | 623 |
| TBILL.resultn | >= | 0.95        | Hemoglobin.resultn | =  | Missing     | age.yrs       | <            | 48.64476386  | -0.004689415 | 623 |
| TBILL.resultn | >= | 0.95        | Hemoglobin.resultn | =  | Missing     | age.yrs       | >=           | 48.64476386  | 0            | 623 |
| TBILL.resultn | >= | 0.95        | Hemoglobin.resultn | <  | 13.75       |               | Missing      | -0.00377603  | 623          |     |
| TBILL.resultn | >= | 0.95        | Hemoglobin.resultn | >= | 13.75       |               | Missing      | -0.006048166 | 623          |     |
| ALB.resultn   | =  | Missing     |                    |    |             | Missing       | -0.000507222 | 624          |              |     |
| ALB.resultn   | <  | 2.95        |                    |    |             | Missing       | 0.001682437  | 624          |              |     |
| ALB.resultn   | >= | 2.95        | TBILL.resultn      | =  | Missing     | Missing       | -0.000232057 | 624          |              |     |
| ALB.resultn   | >= | 2.95        | TBILL.resultn      | <  | 0.85        |               | Missing      | -0.000852953 | 624          |     |
| ALB.resultn   | >= | 2.95        | TBILL.resultn      | >= | 0.85        | PLT.resultn   | =            | Missing      | 0.000591304  | 624 |
| ALB.resultn   | >= | 2.95        | TBILL.resultn      | >= | 0.85        | PLT.resultn   | <            | 209.5        | 0.002583063  | 624 |
| ALB.resultn   | >= | 2.95        | TBILL.resultn      | >= | 0.85        | PLT.resultn   | >=           | 209.5        | 0            | 624 |
| PLT.resultn   | =  | Missing     |                    |    |             |               | -0.002071671 | 625          |              |     |
| PLT.resultn   | <  | 195.5       | TBILL.resultn      | =  | Missing     |               | -0.00067391  | 625          |              |     |
| PLT.resultn   | <  | 195.5       | TBILL.resultn      | <  | 1.2         |               | -0.001689097 | 625          |              |     |
| PLT.resultn   | <  | 195.5       | TBILL.resultn      | >= | 1.2         |               | 0.000887916  | 625          |              |     |
| PLT.resultn   | >= | 195.5       | Hemoglobin.resultn | =  | Missing     |               | 0            | 625          |              |     |
| PLT.resultn   | >= | 195.5       | Hemoglobin.resultn | <  | 12.85       |               | -0.002753997 | 625          |              |     |
| PLT.resultn   | >= | 195.5       | Hemoglobin.resultn | >= | 12.85       |               | -0.002422232 | 625          |              |     |
| ALB.resultn   | =  | Missing     |                    |    |             |               | -0.000425861 | 626          |              |     |
| ALB.resultn   | <  | 3.31        | PLT.resultn        | =  | Missing     |               | 0.001578134  | 626          |              |     |
| ALB.resultn   | <  | 3.31        | PLT.resultn        | <  | 257         |               | 0.003279613  | 626          |              |     |
| ALB.resultn   | <  | 3.31        | PLT.resultn        | >= | 257         |               | 0.000632867  | 626          |              |     |
| ALB.resultn   | >= | 3.31        | psc.yrs.dur        | =  | Missing     |               | 0.000154793  | 626          |              |     |
| ALB.resultn   | >= | 3.31        | psc.yrs.dur        | <  | 0.004106776 |               | 0.002772198  | 626          |              |     |
| ALB.resultn   | >= | 3.31        | psc.yrs.dur        | >= | 0.004106776 |               | 0            | 626          |              |     |
| ALB.resultn   | =  | Missing     |                    |    |             | Missing       | -0.002443072 | 627          |              |     |
| ALB.resultn   | <  | 2.965       |                    |    |             | Missing       | 0.000391193  | 627          |              |     |
| ALB.resultn   | >= | 2.965       | age.yrs            | =  | Missing     | Missing       | -0.002631529 | 627          |              |     |
| ALB.resultn   | >= | 2.965       | age.yrs            | <  | 51.9945243  |               | Missing      | -0.003006338 | 627          |     |
| ALB.resultn   | >= | 2.965       | age.yrs            | >= | 51.9945243  | TBILL.resultn | =            | Missing      | -0.001756977 | 627 |
| ALB.resultn   | >= | 2.965       | age.yrs            | >= | 51.9945243  | TBILL.resultn | <            | 0.95         | -0.002785451 | 627 |
| ALB.resultn   | >= | 2.965       | age.yrs            | >= | 51.9945243  | TBILL.resultn | >=           | 0.95         | 0            | 627 |
| age.yrs       | =  | Missing     |                    |    |             | Missing       | -0.002298235 | 628          |              |     |
| age.yrs       | <  | 54.39972621 |                    |    |             | Missing       | -0.002610242 | 628          |              |     |
| age.yrs       | >= | 54.39972621 | TBILL.resultn      | =  | Missing     | Missing       | -0.001371964 | 628          |              |     |
| age.yrs       | >= | 54.39972621 | TBILL.resultn      | <  | 1.5         | AST.resultn   | =            | Missing      | -0.00194706  | 628 |
| age.yrs       | >= | 54.39972621 | TBILL.resultn      | <  | 1.5         | AST.resultn   | <            | 79.5         | -0.002482502 | 628 |
| age.yrs       | >= | 54.39972621 | TBILL.resultn      | <  | 1.5         | AST.resultn   | >=           | 79.5         | 0            | 628 |
| age.yrs       | >= | 54.39972621 | TBILL.resultn      | >= | 1.5         |               | Missing      | 0.001618536  | 628          |     |
| TBILL.resultn | =  | Missing     |                    |    |             | Missing       | -0.005226756 | 629          |              |     |
| TBILL.resultn | <  | 2.35        | psc.yrs.dur        | =  | Missing     | Missing       | -0.005531526 | 629          |              |     |
| TBILL.resultn | <  | 2.35        | psc.yrs.dur        | <  | 6.410677618 |               | Missing      | -0.005803    | 629          |     |
| TBILL.resultn | <  | 2.35        | psc.yrs.dur        | >= | 6.410677618 | PLT.resultn   | =            | Missing      | -0.003560827 | 629 |
| TBILL.resultn | <  | 2.35        | psc.yrs.dur        | >= | 6.410677618 | PLT.resultn   | <            | 244          | -0.006172099 | 629 |



|               |    |                           |    |                         |         |             |              |     |
|---------------|----|---------------------------|----|-------------------------|---------|-------------|--------------|-----|
| TBILL.resultn | <  | 2.35 psc.yrs.dur          | >= | 6.410677618 PLT.resultn | >=      | 244         | 0            | 629 |
| TBILL.resultn | >= | 2.35                      |    |                         | Missing |             | -0.003223314 | 629 |
| TBILL.resultn | =  | Missing                   |    |                         | Missing |             | -0.001114892 | 630 |
| TBILL.resultn | <  | 1.05                      |    |                         | Missing |             | -0.001811927 | 630 |
| TBILL.resultn | >= | 1.05 Hemoglobin.resultn   | =  | Missing                 | Missing |             | 0.00186093   | 630 |
| TBILL.resultn | >= | 1.05 Hemoglobin.resultn   | <  | 13.35 PLT.resultn       | =       | Missing     | 0.000682216  | 630 |
| TBILL.resultn | >= | 1.05 Hemoglobin.resultn   | <  | 13.35 PLT.resultn       | <       | 244         | 0.001637319  | 630 |
| TBILL.resultn | >= | 1.05 Hemoglobin.resultn   | <  | 13.35 PLT.resultn       | >=      | 244         | 0            | 630 |
| TBILL.resultn | >= | 1.05 Hemoglobin.resultn   | >= | 13.35                   | Missing |             | -0.001681113 | 630 |
| TBILL.resultn | =  | Missing                   |    |                         | Missing |             | 0.000119951  | 631 |
| TBILL.resultn | <  | 2.05 psc.yrs.dur          | =  | Missing                 | Missing |             | 7.58E-05     | 631 |
| TBILL.resultn | <  | 2.05 psc.yrs.dur          | <  | 6.324435318             | Missing |             | -0.00018261  | 631 |
| TBILL.resultn | <  | 2.05 psc.yrs.dur          | >= | 6.324435318 psc.yrs.dur | =       | Missing     | 0.001678138  | 631 |
| TBILL.resultn | <  | 2.05 psc.yrs.dur          | >= | 6.324435318 psc.yrs.dur | <       | 10.18206708 | 0.005034413  | 631 |
| TBILL.resultn | <  | 2.05 psc.yrs.dur          | >= | 6.324435318 psc.yrs.dur | >=      | 10.18206708 | 0            | 631 |
| TBILL.resultn | >= | 2.05                      |    |                         | Missing |             | 0.002022159  | 631 |
| TBILL.resultn | =  | Missing                   |    |                         |         |             | 0.002093147  | 632 |
| TBILL.resultn | <  | 2.35 Sodium.resultn       | =  | Missing                 |         |             | 0            | 632 |
| TBILL.resultn | <  | 2.35 Sodium.resultn       | <  | 136.5                   |         |             | 0.003187788  | 632 |
| TBILL.resultn | <  | 2.35 Sodium.resultn       | >= | 136.5                   |         |             | -0.000241589 | 632 |
| TBILL.resultn | >= | 2.35 Hemoglobin.resultn   | =  | Missing                 |         |             | 0.000889255  | 632 |
| TBILL.resultn | >= | 2.35 Hemoglobin.resultn   | <  | 12.95                   |         |             | 0.002325687  | 632 |
| TBILL.resultn | >= | 2.35 Hemoglobin.resultn   | >= | 12.95                   |         |             | -0.000547176 | 632 |
| PLT.resultn   | =  | Missing                   |    |                         |         |             | -0.000382265 | 633 |
| PLT.resultn   | <  | 207 TBILL.resultn         | =  | Missing                 |         |             | 0.001193435  | 633 |
| PLT.resultn   | <  | 207 TBILL.resultn         | <  | 1.65                    |         |             | 0.00051614   | 633 |
| PLT.resultn   | <  | 207 TBILL.resultn         | >= | 1.65                    |         |             | 0.003293048  | 633 |
| PLT.resultn   | >= | 207 ALK.times.uln         | =  | Missing                 |         |             | 0            | 633 |
| PLT.resultn   | >= | 207 ALK.times.uln         | <  | 6.02                    |         |             | 1.38E-06     | 633 |
| PLT.resultn   | >= | 207 ALK.times.uln         | >= | 6.02                    |         |             | 0.001423182  | 633 |
| TBILL.resultn | =  | Missing                   |    |                         | Missing |             | -2.22E-06    | 634 |
| TBILL.resultn | <  | 3.5 ALK.times.uln         | =  | Missing age.yrs         | =       | Missing     | -0.001627867 | 634 |
| TBILL.resultn | <  | 3.5 ALK.times.uln         | =  | Missing age.yrs         | <       | 58.62696783 | -0.002067831 | 634 |
| TBILL.resultn | <  | 3.5 ALK.times.uln         | =  | Missing age.yrs         | >=      | 58.62696783 | 0            | 634 |
| TBILL.resultn | <  | 3.5 ALK.times.uln         | <  | 5.462893197             | Missing |             | -0.001618607 | 634 |
| TBILL.resultn | <  | 3.5 ALK.times.uln         | >= | 5.462893197             | Missing |             | 0.000304101  | 634 |
| TBILL.resultn | >= | 3.5                       |    |                         | Missing |             | -0.000109612 | 634 |
| ALK.times.uln | =  | Missing ALB.resultn       | =  | Missing                 |         |             | -0.001115194 | 635 |
| ALK.times.uln | =  | Missing ALB.resultn       | <  | 3.95                    |         |             | 0.00153069   | 635 |
| ALK.times.uln | =  | Missing ALB.resultn       | >= | 3.95                    |         |             | -0.000788924 | 635 |
| ALK.times.uln | <  | 5.446215139 TBILL.resultn | =  | Missing                 |         |             | -0.000628636 | 635 |
| ALK.times.uln | <  | 5.446215139 TBILL.resultn | <  | 0.85                    |         |             | -0.001131545 | 635 |
| ALK.times.uln | <  | 5.446215139 TBILL.resultn | >= | 0.85                    |         |             | 0            | 635 |
| ALK.times.uln | >= | 5.446215139               |    |                         |         |             | 0.00128323   | 635 |
| ALB.resultn   | =  | Missing                   |    |                         |         |             | -0.0007304   | 636 |
| ALB.resultn   | <  | 3.31 psc.yrs.dur          | =  | Missing                 |         |             | 0.000517828  | 636 |
| ALB.resultn   | <  | 3.31 psc.yrs.dur          | <  | 0.739219713             |         |             | -0.001696967 | 636 |
| ALB.resultn   | <  | 3.31 psc.yrs.dur          | >= | 0.739219713             |         |             | 0.002099825  | 636 |
| ALB.resultn   | >= | 3.31 Hemoglobin.resultn   | =  | Missing                 |         |             | 0            | 636 |
| ALB.resultn   | >= | 3.31 Hemoglobin.resultn   | <  | 12.25                   |         |             | -0.001699815 | 636 |
| ALB.resultn   | >= | 3.31 Hemoglobin.resultn   | >= | 12.25                   |         |             | -0.001242137 | 636 |
| ALK.times.uln | =  | Missing TBILL.resultn     | =  | Missing                 |         |             | -0.001830538 | 637 |
| ALK.times.uln | =  | Missing TBILL.resultn     | <  | 1.1                     |         |             | -0.001248204 | 637 |
| ALK.times.uln | =  | Missing TBILL.resultn     | >= | 1.1                     |         |             | 0.003204244  | 637 |
| ALK.times.uln | <  | 6.02 psc.yrs.dur          | =  | Missing                 |         |             | -0.001150836 | 637 |
| ALK.times.uln | <  | 6.02 psc.yrs.dur          | <  | 2                       |         |             | -0.001468604 | 637 |
| ALK.times.uln | <  | 6.02 psc.yrs.dur          | >= | 2                       |         |             | 0            | 637 |
| ALK.times.uln | >= | 6.02                      |    |                         |         |             | 0.000533305  | 637 |
| ALB.resultn   | =  | Missing                   |    |                         |         |             | -0.00019715  | 638 |
| ALB.resultn   | <  | 3.31 age.yrs              | =  | Missing                 |         |             | 0.00108228   | 638 |
| ALB.resultn   | <  | 3.31 age.yrs              | <  | 44.91444216             |         |             | -0.000734035 | 638 |
| ALB.resultn   | <  | 3.31 age.yrs              | >= | 44.91444216             |         |             | 0.002898595  | 638 |

|                    |    |             |                    |    |             |               |         |              |              |
|--------------------|----|-------------|--------------------|----|-------------|---------------|---------|--------------|--------------|
| ALB.resultn        | >= | 3.31        | ALK.times.uln      | =  | Missing     |               |         | 0            | 638          |
| ALB.resultn        | >= | 3.31        | ALK.times.uln      | <  | 2.822501299 |               |         | -0.00141371  | 638          |
| ALB.resultn        | >= | 3.31        | ALK.times.uln      | >= | 2.822501299 |               |         | -8.72E-06    | 638          |
| TBILL.resultn      | =  | Missing     |                    |    |             | Missing       |         | 0.000883879  | 639          |
| TBILL.resultn      | <  | 2.45        | age.yrs            | =  | Missing     | Missing       |         | -0.00028392  | 639          |
| TBILL.resultn      | <  | 2.45        | age.yrs            | <  | 68.52977413 | PLT.resultn   | =       | Missing      | 0            |
| TBILL.resultn      | <  | 2.45        | age.yrs            | <  | 68.52977413 | PLT.resultn   | <       | 209.5        | 0.00018797   |
| TBILL.resultn      | <  | 2.45        | age.yrs            | <  | 68.52977413 | PLT.resultn   | >=      | 209.5        | -0.000737318 |
| TBILL.resultn      | <  | 2.45        | age.yrs            | >= | 68.52977413 |               | Missing | 0.004729986  | 639          |
| TBILL.resultn      | >= | 2.45        |                    |    |             | Missing       |         | 0.001488753  | 639          |
| ALK.times.uln      | =  | Missing     | TBILL.resultn      | =  | Missing     |               | Missing | -0.003465592 | 640          |
| ALK.times.uln      | =  | Missing     | TBILL.resultn      | <  | 0.95        |               | Missing | -0.004309421 | 640          |
| ALK.times.uln      | =  | Missing     | TBILL.resultn      | >= | 0.95        | age.yrs       | =       | Missing      | -0.002019028 |
| ALK.times.uln      | =  | Missing     | TBILL.resultn      | >= | 0.95        | age.yrs       | <       | 49.58521561  | -0.004239959 |
| ALK.times.uln      | =  | Missing     | TBILL.resultn      | >= | 0.95        | age.yrs       | >=      | 49.58521561  | 0            |
| ALK.times.uln      | <  | 2.81254114  |                    |    |             |               | Missing | -0.004094063 | 640          |
| ALK.times.uln      | >= | 2.81254114  |                    |    |             |               | Missing | -0.002372601 | 640          |
| ALK.times.uln      | =  | Missing     | TBILL.resultn      | =  | Missing     |               |         | -0.001851803 | 641          |
| ALK.times.uln      | =  | Missing     | TBILL.resultn      | <  | 0.95        |               |         | -0.001882741 | 641          |
| ALK.times.uln      | =  | Missing     | TBILL.resultn      | >= | 0.95        |               |         | 0.000206563  | 641          |
| ALK.times.uln      | <  | 5.462893197 | TBILL.resultn      | =  | Missing     |               |         | -0.001297155 | 641          |
| ALK.times.uln      | <  | 5.462893197 | TBILL.resultn      | <  | 2.35        |               |         | -0.00137625  | 641          |
| ALK.times.uln      | <  | 5.462893197 | TBILL.resultn      | >= | 2.35        |               |         | 0            | 641          |
| ALK.times.uln      | >= | 5.462893197 |                    |    |             |               |         | 0.00085371   | 641          |
| Hemoglobin.resultn | =  | Missing     | ALB.resultn        | =  | Missing     |               |         | -0.000762014 | 642          |
| Hemoglobin.resultn | =  | Missing     | ALB.resultn        | <  | 3.95        |               |         | 0.003026245  | 642          |
| Hemoglobin.resultn | =  | Missing     | ALB.resultn        | >= | 3.95        |               |         | -0.000750659 | 642          |
| Hemoglobin.resultn | <  | 13.35       | Sodium.resultn     | =  | Missing     |               |         | 0            | 642          |
| Hemoglobin.resultn | <  | 13.35       | Sodium.resultn     | <  | 141.5       |               |         | 0.002394487  | 642          |
| Hemoglobin.resultn | <  | 13.35       | Sodium.resultn     | >= | 141.5       |               |         | -0.000192015 | 642          |
| Hemoglobin.resultn | >= | 13.35       |                    |    |             |               |         | -0.000488953 | 642          |
| ALK.times.uln      | =  | Missing     | TBILL.resultn      | =  | Missing     |               | Missing | -0.002978876 | 643          |
| ALK.times.uln      | =  | Missing     | TBILL.resultn      | <  | 0.95        |               | Missing | -0.003926849 | 643          |
| ALK.times.uln      | =  | Missing     | TBILL.resultn      | >= | 0.95        | age.yrs       | =       | Missing      | -0.001367323 |
| ALK.times.uln      | =  | Missing     | TBILL.resultn      | >= | 0.95        | age.yrs       | <       | 53.46475017  | -0.002734646 |
| ALK.times.uln      | =  | Missing     | TBILL.resultn      | >= | 0.95        | age.yrs       | >=      | 53.46475017  | 0            |
| ALK.times.uln      | <  | 6.02        |                    |    |             |               | Missing | -0.003491742 | 643          |
| ALK.times.uln      | >= | 6.02        |                    |    |             |               | Missing | -0.00119924  | 643          |
| TBILL.resultn      | =  | Missing     |                    |    |             |               | Missing | -8.06E-05    | 644          |
| TBILL.resultn      | <  | 0.95        |                    |    |             |               | Missing | -0.000766229 | 644          |
| TBILL.resultn      | >= | 0.95        | Hemoglobin.resultn | =  | Missing     |               | Missing | 0.001250319  | 644          |
| TBILL.resultn      | >= | 0.95        | Hemoglobin.resultn | <  | 13.75       | PLT.resultn   | =       | Missing      | 0.001829733  |
| TBILL.resultn      | >= | 0.95        | Hemoglobin.resultn | <  | 13.75       | PLT.resultn   | <       | 250          | 0.004222461  |
| TBILL.resultn      | >= | 0.95        | Hemoglobin.resultn | <  | 13.75       | PLT.resultn   | >=      | 250          | 0            |
| TBILL.resultn      | >= | 0.95        | Hemoglobin.resultn | >= | 13.75       |               | Missing | -0.000626274 | 644          |
| TBILL.resultn      | =  | Missing     |                    |    |             |               | Missing | -0.001425125 | 645          |
| TBILL.resultn      | <  | 2.35        | Sodium.resultn     | =  | Missing     | age.yrs       | =       | Missing      | -0.002064735 |
| TBILL.resultn      | <  | 2.35        | Sodium.resultn     | =  | Missing     | age.yrs       | <       | 62.32580424  | -0.002347575 |
| TBILL.resultn      | <  | 2.35        | Sodium.resultn     | =  | Missing     | age.yrs       | >=      | 62.32580424  | 0            |
| TBILL.resultn      | <  | 2.35        | Sodium.resultn     | <  | 136.5       |               | Missing | 0.001186849  | 645          |
| TBILL.resultn      | <  | 2.35        | Sodium.resultn     | >= | 136.5       |               | Missing | -0.002003876 | 645          |
| TBILL.resultn      | >= | 2.35        |                    |    |             |               | Missing | 0.000696978  | 645          |
| ALK.times.uln      | =  | Missing     | ALB.resultn        | =  | Missing     |               | Missing | -0.003543926 | 646          |
| ALK.times.uln      | =  | Missing     | ALB.resultn        | <  | 3.95        | TBILL.resultn | =       | Missing      | -0.001015393 |
| ALK.times.uln      | =  | Missing     | ALB.resultn        | <  | 3.95        | TBILL.resultn | <       | 0.95         | -0.002335404 |
| ALK.times.uln      | =  | Missing     | ALB.resultn        | >= | 3.95        | TBILL.resultn | >=      | 0.95         | 0            |
| ALK.times.uln      | =  | Missing     | ALB.resultn        | >= | 3.95        |               | Missing | -0.003537103 | 646          |
| ALK.times.uln      | <  | 6.068877551 |                    |    |             |               | Missing | -0.003047253 | 646          |
| ALK.times.uln      | >= | 6.068877551 |                    |    |             |               | Missing | -0.001110824 | 646          |
| Sodium.resultn     | =  | Missing     |                    |    |             |               | Missing | -0.000379158 | 647          |
| Sodium.resultn     | <  | 136.5       |                    |    |             |               | Missing | 0.002661958  | 647          |
| Sodium.resultn     | >= | 136.5       | Hemoglobin.resultn | =  | Missing     | ALB.resultn   | =       | Missing      | 0.001634631  |

|                |    |             |                    |    |             |             |         |         |              |     |
|----------------|----|-------------|--------------------|----|-------------|-------------|---------|---------|--------------|-----|
| Sodium.resultn | >= | 136.5       | Hemoglobin.resultn | =  | Missing     | ALB.resultn | <       | 3.95    | 0.004359016  | 647 |
| Sodium.resultn | >= | 136.5       | Hemoglobin.resultn | =  | Missing     | ALB.resultn | >=      | 3.95    | 0            | 647 |
| Sodium.resultn | >= | 136.5       | Hemoglobin.resultn | <  | 12.85       |             | Missing |         | -0.000383183 | 647 |
| Sodium.resultn | >= | 136.5       | Hemoglobin.resultn | >= | 12.85       |             | Missing |         | -5.13E-05    | 647 |
| ALK.times.uln  | =  | Missing     | TBILL.resultn      | =  | Missing     |             |         |         | -0.001893083 | 648 |
| ALK.times.uln  | =  | Missing     | TBILL.resultn      | <  | 1.15        |             |         |         | -0.001436043 | 648 |
| ALK.times.uln  | =  | Missing     | TBILL.resultn      | >= | 1.15        |             |         |         | 0.001782845  | 648 |
| ALK.times.uln  | <  | 6.02        | TBILL.resultn      | =  | Missing     |             |         |         | -0.001585048 | 648 |
| ALK.times.uln  | <  | 6.02        | TBILL.resultn      | <  | 2.95        |             |         |         | -0.001687309 | 648 |
| ALK.times.uln  | <  | 6.02        | TBILL.resultn      | >= | 2.95        |             |         |         | 0            | 648 |
| ALK.times.uln  | >= | 6.02        |                    |    |             |             |         |         | 0.000315316  | 648 |
| TBILL.resultn  | =  | Missing     |                    |    |             |             |         |         | 0.002229946  | 649 |
| TBILL.resultn  | <  | 1.65        | ALK.times.uln      | =  | Missing     |             |         |         | 0            | 649 |
| TBILL.resultn  | <  | 1.65        | ALK.times.uln      | <  | 2.795652174 |             |         |         | -0.000415368 | 649 |
| TBILL.resultn  | <  | 1.65        | ALK.times.uln      | >= | 2.795652174 |             |         |         | 0.001529497  | 649 |
| TBILL.resultn  | >= | 1.65        | Hemoglobin.resultn | =  | Missing     |             |         |         | 0.001606534  | 649 |
| TBILL.resultn  | >= | 1.65        | Hemoglobin.resultn | <  | 13.6        |             |         |         | 0.003813872  | 649 |
| TBILL.resultn  | >= | 1.65        | Hemoglobin.resultn | >= | 13.6        |             |         |         | -0.000400137 | 649 |
| age.yrs        | =  | Missing     |                    |    |             |             |         |         | 0.000878302  | 650 |
| age.yrs        | <  | 62.47912389 | TBILL.resultn      | =  | Missing     |             |         |         | 0            | 650 |
| age.yrs        | <  | 62.47912389 | TBILL.resultn      | <  | 3.35        |             |         |         | 0.000454687  | 650 |
| age.yrs        | <  | 62.47912389 | TBILL.resultn      | >= | 3.35        |             |         |         | 0.002095331  | 650 |
| age.yrs        | >= | 62.47912389 | AST.resultn        | =  | Missing     |             |         |         | 0.003664695  | 650 |
| age.yrs        | >= | 62.47912389 | AST.resultn        | <  | 51          |             |         |         | 4.69E-06     | 650 |
| age.yrs        | >= | 62.47912389 | AST.resultn        | >= | 51          |             |         |         | 0.006180947  | 650 |
| ALB.resultn    | =  | Missing     |                    |    |             |             |         |         | -0.001570425 | 651 |
| ALB.resultn    | <  | 3.33        | TBILL.resultn      | =  | Missing     |             |         |         | 0.000588904  | 651 |
| ALB.resultn    | <  | 3.33        | TBILL.resultn      | <  | 1.6         |             |         |         | -0.001073476 | 651 |
| ALB.resultn    | <  | 3.33        | TBILL.resultn      | >= | 1.6         |             |         |         | 0.00237916   | 651 |
| ALB.resultn    | >= | 3.33        | age.yrs            | =  | Missing     |             |         |         | -0.000913658 | 651 |
| ALB.resultn    | >= | 3.33        | age.yrs            | <  | 49.41957563 |             |         |         | -0.001434728 | 651 |
| ALB.resultn    | >= | 3.33        | age.yrs            | >= | 49.41957563 |             |         |         | 0            | 651 |
| AST.resultn    | =  | Missing     |                    |    |             |             | Missing |         | -0.000623287 | 652 |
| AST.resultn    | <  | 43.5        |                    |    |             |             | Missing |         | -0.000622256 | 652 |
| AST.resultn    | >= | 43.5        | psc.yrs.dur        | =  | Missing     |             | Missing |         | 0.00119586   | 652 |
| AST.resultn    | >= | 43.5        | psc.yrs.dur        | <  | 6.410677618 | AST.resultn | =       | Missing | 0.000742276  | 652 |
| AST.resultn    | >= | 43.5        | psc.yrs.dur        | <  | 6.410677618 | AST.resultn | <       | 72.5    | 0.001673495  | 652 |
| AST.resultn    | >= | 43.5        | psc.yrs.dur        | <  | 6.410677618 | AST.resultn | >=      | 72.5    | 0            | 652 |
| AST.resultn    | >= | 43.5        | psc.yrs.dur        | >= | 6.410677618 |             | Missing |         | 0.004156092  | 652 |
| ALB.resultn    | =  | Missing     |                    |    |             |             | Missing |         | -0.001594891 | 653 |
| ALB.resultn    | <  | 2.915       |                    |    |             |             | Missing |         | 0.000290731  | 653 |
| ALB.resultn    | >= | 2.915       | age.yrs            | =  | Missing     |             | Missing |         | -0.002014649 | 653 |
| ALB.resultn    | >= | 2.915       | age.yrs            | <  | 53.35797399 |             | Missing |         | -0.002306206 | 653 |
| ALB.resultn    | >= | 2.915       | age.yrs            | >= | 53.35797399 | AST.resultn | =       | Missing | -0.001288146 | 653 |
| ALB.resultn    | >= | 2.915       | age.yrs            | >= | 53.35797399 | AST.resultn | <       | 51.5    | -0.002576293 | 653 |
| ALB.resultn    | >= | 2.915       | age.yrs            | >= | 53.35797399 | AST.resultn | >=      | 51.5    | 0            | 653 |
| ALK.times.uln  | =  | Missing     | TBILL.resultn      | =  | Missing     |             |         |         | 0.000227685  | 654 |
| ALK.times.uln  | =  | Missing     | TBILL.resultn      | <  | 1.65        |             |         |         | -0.000238449 | 654 |
| ALK.times.uln  | =  | Missing     | TBILL.resultn      | >= | 1.65        |             |         |         | 0.002651581  | 654 |
| ALK.times.uln  | <  | 5.963877551 | PLT.resultn        | =  | Missing     |             |         |         | 0.000201246  | 654 |
| ALK.times.uln  | <  | 5.963877551 | PLT.resultn        | <  | 185.5       |             |         |         | 0.002632964  | 654 |
| ALK.times.uln  | <  | 5.963877551 | PLT.resultn        | >= | 185.5       |             |         |         | 0            | 654 |
| ALK.times.uln  | >= | 5.963877551 |                    |    |             |             |         |         | 0.00221476   | 654 |
| ALB.resultn    | =  | Missing     |                    |    |             |             | Missing |         | -3.67E-05    | 655 |
| ALB.resultn    | <  | 3.105       |                    |    |             |             | Missing |         | 0.002728383  | 655 |
| ALB.resultn    | >= | 3.105       | PLT.resultn        | =  | Missing     |             | Missing |         | 0.000839933  | 655 |
| ALB.resultn    | >= | 3.105       | PLT.resultn        | <  | 197.5       | ALB.resultn | =       | Missing | 0.003356972  | 655 |
| ALB.resultn    | >= | 3.105       | PLT.resultn        | <  | 197.5       | ALB.resultn | <       | 4.35    | 0.006197487  | 655 |
| ALB.resultn    | >= | 3.105       | PLT.resultn        | <  | 197.5       | ALB.resultn | >=      | 4.35    | 0            | 655 |
| ALB.resultn    | >= | 3.105       | PLT.resultn        | >= | 197.5       |             | Missing |         | 0.000213572  | 655 |
| TBILL.resultn  | =  | Missing     |                    |    |             |             | Missing |         | -0.001726709 | 656 |
| TBILL.resultn  | <  | 3.35        | Sodium.resultn     | =  | Missing     |             | Missing |         | -0.001284012 | 656 |

|               |    |                         |    |                           |                |              |     |
|---------------|----|-------------------------|----|---------------------------|----------------|--------------|-----|
| TBILL.resultn | <  | 3.35 Sodium.resultn     | <  | 136.5                     | Missing        | 0.001434961  | 656 |
| TBILL.resultn | <  | 3.35 Sodium.resultn     | >= | 136.5 age.yrs             | = Missing      | -0.001103291 | 656 |
| TBILL.resultn | <  | 3.35 Sodium.resultn     | >= | 136.5 age.yrs             | < 54.96783025  | -0.001569125 | 656 |
| TBILL.resultn | <  | 3.35 Sodium.resultn     | >= | 136.5 age.yrs             | >= 54.96783025 | 0            | 656 |
| TBILL.resultn | >= | 3.35                    |    |                           | Missing        | 0.000715461  | 656 |
| ALK.times.uln | =  | Missing ALB.resultn     | =  | Missing                   |                | 1.36E-05     | 657 |
| ALK.times.uln | =  | Missing ALB.resultn     | <  | 3.95                      |                | 0.002752525  | 657 |
| ALK.times.uln | =  | Missing ALB.resultn     | >= | 3.95                      |                | 3.52E-05     | 657 |
| ALK.times.uln | <  | 5.462893197 PLT.resultn | =  | Missing                   |                | 0            | 657 |
| ALK.times.uln | <  | 5.462893197 PLT.resultn | <  | 194.5                     |                | 0.002602931  | 657 |
| ALK.times.uln | <  | 5.462893197 PLT.resultn | >= | 194.5                     |                | 0.000148101  | 657 |
| ALK.times.uln | >= | 5.462893197             |    |                           |                | 0.002465737  | 657 |
| ALK.times.uln | =  | Missing age.yrs         | =  | Missing                   | Missing        | -0.003717744 | 658 |
| ALK.times.uln | =  | Missing age.yrs         | <  | 53.55509925               | Missing        | -0.004528424 | 658 |
| ALK.times.uln | =  | Missing age.yrs         | >= | 53.55509925 AST.resultn   | = Missing      | -0.002134989 | 658 |
| ALK.times.uln | =  | Missing age.yrs         | >= | 53.55509925 AST.resultn   | < 52.5         | -0.004483476 | 658 |
| ALK.times.uln | =  | Missing age.yrs         | >= | 53.55509925 AST.resultn   | >= 52.5        | 0            | 658 |
| ALK.times.uln | <  | 5.963877551             |    |                           | Missing        | -0.003936314 | 658 |
| ALK.times.uln | >= | 5.963877551             |    |                           | Missing        | -0.00215911  | 658 |
| ALB.resultn   | =  | Missing                 |    |                           | Missing        | -0.004233288 | 659 |
| ALB.resultn   | <  | 2.875                   |    |                           | Missing        | -0.001934206 | 659 |
| ALB.resultn   | >= | 2.875 age.yrs           | =  | Missing                   | Missing        | -0.00441442  | 659 |
| ALB.resultn   | >= | 2.875 age.yrs           | <  | 54.36824093               | Missing        | -0.004823142 | 659 |
| ALB.resultn   | >= | 2.875 age.yrs           | >= | 54.36824093 TBILL.resultn | = Missing      | -0.003408336 | 659 |
| ALB.resultn   | >= | 2.875 age.yrs           | >= | 54.36824093 TBILL.resultn | < 1.35         | -0.004028034 | 659 |
| ALB.resultn   | >= | 2.875 age.yrs           | >= | 54.36824093 TBILL.resultn | >= 1.35        | 0            | 659 |
| TBILL.resultn | =  | Missing                 |    |                           |                | 0.001897525  | 660 |
| TBILL.resultn | <  | 1.65 Sodium.resultn     | =  | Missing                   |                | 0            | 660 |
| TBILL.resultn | <  | 1.65 Sodium.resultn     | <  | 137.5                     |                | 0.001576925  | 660 |
| TBILL.resultn | <  | 1.65 Sodium.resultn     | >= | 137.5                     |                | -9.11E-05    | 660 |
| TBILL.resultn | >= | 1.65 PLT.resultn        | =  | Missing                   |                | 0.001409507  | 660 |
| TBILL.resultn | >= | 1.65 PLT.resultn        | <  | 209                       |                | 0.003211059  | 660 |
| TBILL.resultn | >= | 1.65 PLT.resultn        | >= | 209                       |                | 0.000508731  | 660 |
| AST.resultn   | =  | Missing                 |    |                           | Missing        | -0.002617961 | 661 |
| AST.resultn   | <  | 211.5 ALK.times.uln     | =  | Missing TBILL.resultn     | = Missing      | -0.002382206 | 661 |
| AST.resultn   | <  | 211.5 ALK.times.uln     | =  | Missing TBILL.resultn     | < 1.15         | -0.003363115 | 661 |
| AST.resultn   | <  | 211.5 ALK.times.uln     | =  | Missing TBILL.resultn     | >= 1.15        | 0            | 661 |
| AST.resultn   | <  | 211.5 ALK.times.uln     | <  | 5.926121601               | Missing        | -0.003036903 | 661 |
| AST.resultn   | <  | 211.5 ALK.times.uln     | >= | 5.926121601               | Missing        | -0.000982503 | 661 |
| AST.resultn   | >= | 211.5                   |    |                           | Missing        | 0.001268423  | 661 |
| TBILL.resultn | =  | Missing                 |    |                           |                | 0.000972852  | 662 |
| TBILL.resultn | <  | 2.05 Sodium.resultn     | =  | Missing                   |                | 0            | 662 |
| TBILL.resultn | <  | 2.05 Sodium.resultn     | <  | 137.5                     |                | 0.001686779  | 662 |
| TBILL.resultn | <  | 2.05 Sodium.resultn     | >= | 137.5                     |                | 0.000108207  | 662 |
| TBILL.resultn | >= | 2.05 psc.yrs.dur        | =  | Missing                   |                | 0.001957912  | 662 |
| TBILL.resultn | >= | 2.05 psc.yrs.dur        | <  | 0.454483231               |                | 0.000484305  | 662 |
| TBILL.resultn | >= | 2.05 psc.yrs.dur        | >= | 0.454483231               |                | 0.002878917  | 662 |
| ALK.times.uln | =  | Missing TBILL.resultn   | =  | Missing                   |                | 0            | 663 |
| ALK.times.uln | =  | Missing TBILL.resultn   | <  | 1.15                      |                | 3.06E-05     | 663 |
| ALK.times.uln | =  | Missing TBILL.resultn   | >= | 1.15                      |                | 0.002410534  | 663 |
| ALK.times.uln | <  | 5.462893197             |    |                           |                | 0.000452286  | 663 |
| ALK.times.uln | >= | 5.462893197 AST.resultn | =  | Missing                   |                | 0.003422909  | 663 |
| ALK.times.uln | >= | 5.462893197 AST.resultn | <  | 122.5                     |                | 0.005880185  | 663 |
| ALK.times.uln | >= | 5.462893197 AST.resultn | >= | 122.5                     |                | 0.000965633  | 663 |
| ALK.times.uln | =  | Missing TBILL.resultn   | =  | Missing                   |                | -0.00032142  | 664 |
| ALK.times.uln | =  | Missing TBILL.resultn   | <  | 1.15                      |                | -0.000307028 | 664 |
| ALK.times.uln | =  | Missing TBILL.resultn   | >= | 1.15                      |                | 0.005931128  | 664 |
| ALK.times.uln | <  | 6.02 TBILL.resultn      | =  | Missing                   |                | 1.66E-05     | 664 |
| ALK.times.uln | <  | 6.02 TBILL.resultn      | <  | 1.15                      |                | 2.22E-05     | 664 |
| ALK.times.uln | <  | 6.02 TBILL.resultn      | >= | 1.15                      |                | 0            | 664 |
| ALK.times.uln | >= | 6.02                    |    |                           |                | 0.00204074   | 664 |
| TBILL.resultn | =  | Missing                 |    |                           |                | 0.002104777  | 665 |

|               |    |                           |    |                            |    |            |              |     |
|---------------|----|---------------------------|----|----------------------------|----|------------|--------------|-----|
| TBILL.resultn | <  | 2.25 ALK.times.uln        | =  | Missing                    |    |            | 0            | 665 |
| TBILL.resultn | <  | 2.25 ALK.times.uln        | <  | 5.963877551                |    |            | -0.000113181 | 665 |
| TBILL.resultn | <  | 2.25 ALK.times.uln        | >= | 5.963877551                |    |            | 0.001994144  | 665 |
| TBILL.resultn | >= | 2.25 PLT.resultn          | =  | Missing                    |    |            | 0.001314981  | 665 |
| TBILL.resultn | >= | 2.25 PLT.resultn          | <  | 249.5                      |    |            | 0.002987628  | 665 |
| TBILL.resultn | >= | 2.25 PLT.resultn          | >= | 249.5                      |    |            | -0.000357667 | 665 |
| TBILL.resultn | =  | Missing                   |    |                            |    |            | -0.002832615 | 666 |
| TBILL.resultn | <  | 1.65 age.yrs              | =  | Missing                    |    |            | -0.002995038 | 666 |
| TBILL.resultn | <  | 1.65 age.yrs              | <  | 69.50444901                |    |            | -0.003144045 | 666 |
| TBILL.resultn | <  | 1.65 age.yrs              | >= | 69.50444901                |    |            | 0            | 666 |
| TBILL.resultn | >= | 1.65 ALB.resultn          | =  | Missing                    |    |            | -0.001824639 | 666 |
| TBILL.resultn | >= | 1.65 ALB.resultn          | <  | 3.35                       |    |            | -0.000546736 | 666 |
| TBILL.resultn | >= | 1.65 ALB.resultn          | >= | 3.35                       |    |            | -0.002655276 | 666 |
| ALB.resultn   | =  | Missing                   |    |                            |    | Missing    | -0.003955345 | 667 |
| ALB.resultn   | <  | 2.915                     |    |                            |    | Missing    | -0.001207909 | 667 |
| ALB.resultn   | >= | 2.915 TBILL.resultn       | =  | Missing                    |    | Missing    | -0.00401881  | 667 |
| ALB.resultn   | >= | 2.915 TBILL.resultn       | <  | 1.15                       |    | Missing    | -0.004434244 | 667 |
| ALB.resultn   | >= | 2.915 TBILL.resultn       | >= | 1.15 Hemoglobin.resultn    | =  | Missing    | 0            | 667 |
| ALB.resultn   | >= | 2.915 TBILL.resultn       | >= | 1.15 Hemoglobin.resultn    | <  | 13.65      | -0.004065739 | 667 |
| ALB.resultn   | >= | 2.915 TBILL.resultn       | >= | 1.15 Hemoglobin.resultn    | >= | 13.65      | -0.003432643 | 667 |
| age.yrs       | =  | Missing                   |    |                            |    | Missing    | -0.001928149 | 668 |
| age.yrs       | <  | 54.39972621               |    |                            |    | Missing    | -0.002352089 | 668 |
| age.yrs       | >= | 54.39972621 TBILL.resultn | =  | Missing                    |    | Missing    | -0.00058683  | 668 |
| age.yrs       | >= | 54.39972621 TBILL.resultn | <  | 1.5 AST.resultn            | =  | Missing    | -0.001591675 | 668 |
| age.yrs       | >= | 54.39972621 TBILL.resultn | <  | 1.5 AST.resultn            | <  | 50.5       | -0.00278543  | 668 |
| age.yrs       | >= | 54.39972621 TBILL.resultn | <  | 1.5 AST.resultn            | >= | 50.5       | 0            | 668 |
| age.yrs       | >= | 54.39972621 TBILL.resultn | >= | 1.5                        |    | Missing    | 0.004336906  | 668 |
| TBILL.resultn | =  | Missing                   |    |                            |    | Missing    | -0.003394787 | 669 |
| TBILL.resultn | <  | 0.75                      |    |                            |    | Missing    | -0.003416016 | 669 |
| TBILL.resultn | >= | 0.75 PLT.resultn          | =  | Missing                    |    | Missing    | -0.002490239 | 669 |
| TBILL.resultn | >= | 0.75 PLT.resultn          | <  | 249.5 ALK.times.uln        | =  | Missing    | 0            | 669 |
| TBILL.resultn | >= | 0.75 PLT.resultn          | <  | 249.5 ALK.times.uln        | <  | 2.84063745 | -0.00269148  | 669 |
| TBILL.resultn | >= | 0.75 PLT.resultn          | <  | 249.5 ALK.times.uln        | >= | 2.84063745 | 0.000440769  | 669 |
| TBILL.resultn | >= | 0.75 PLT.resultn          | >= | 249.5                      |    | Missing    | -0.00264808  | 669 |
| ALB.resultn   | =  | Missing                   |    |                            |    | Missing    | -0.003039603 | 670 |
| ALB.resultn   | <  | 2.915                     |    |                            |    | Missing    | -0.000666216 | 670 |
| ALB.resultn   | >= | 2.915 psc.yrs.dur         | =  | Missing                    |    | Missing    | -0.002898432 | 670 |
| ALB.resultn   | >= | 2.915 psc.yrs.dur         | <  | 6.410677618                |    | Missing    | -0.00311038  | 670 |
| ALB.resultn   | >= | 2.915 psc.yrs.dur         | >= | 6.410677618 TBILL.resultn  | =  | Missing    | -0.00163337  | 670 |
| ALB.resultn   | >= | 2.915 psc.yrs.dur         | >= | 6.410677618 TBILL.resultn  | <  | 1.26       | -0.002411166 | 670 |
| ALB.resultn   | >= | 2.915 psc.yrs.dur         | >= | 6.410677618 TBILL.resultn  | >= | 1.26       | 0            | 670 |
| ALK.times.uln | =  | Missing TBILL.resultn     | =  | Missing                    |    |            | -0.000753592 | 671 |
| ALK.times.uln | =  | Missing TBILL.resultn     | <  | 1.2                        |    |            | -0.000763985 | 671 |
| ALK.times.uln | =  | Missing TBILL.resultn     | >= | 1.2                        |    |            | 0.0021681    | 671 |
| ALK.times.uln | <  | 5.462893197 TBILL.resultn | =  | Missing                    |    |            | -0.000470684 | 671 |
| ALK.times.uln | <  | 5.462893197 TBILL.resultn | <  | 0.85                       |    |            | -0.000763149 | 671 |
| ALK.times.uln | <  | 5.462893197 TBILL.resultn | >= | 0.85                       |    |            | 0            | 671 |
| ALK.times.uln | >= | 5.462893197               |    |                            |    |            | 0.003630798  | 671 |
| ALB.resultn   | =  | Missing                   |    |                            |    | Missing    | -0.001277105 | 672 |
| ALB.resultn   | <  | 2.915                     |    |                            |    | Missing    | 0.001088643  | 672 |
| ALB.resultn   | >= | 2.915 TBILL.resultn       | =  | Missing                    |    | Missing    | -0.001611659 | 672 |
| ALB.resultn   | >= | 2.915 TBILL.resultn       | <  | 0.75                       |    | Missing    | -0.002198351 | 672 |
| ALB.resultn   | >= | 2.915 TBILL.resultn       | >= | 0.75 Hemoglobin.resultn    | =  | Missing    | 0            | 672 |
| ALB.resultn   | >= | 2.915 TBILL.resultn       | >= | 0.75 Hemoglobin.resultn    | <  | 13.35      | -0.000881906 | 672 |
| ALB.resultn   | >= | 2.915 TBILL.resultn       | >= | 0.75 Hemoglobin.resultn    | >= | 13.35      | -0.001760583 | 672 |
| TBILL.resultn | =  | Missing                   |    |                            |    | Missing    | -0.00124915  | 673 |
| TBILL.resultn | <  | 1.55                      |    |                            |    | Missing    | -0.002201528 | 673 |
| TBILL.resultn | >= | 1.55 age.yrs              | =  | Missing                    |    | Missing    | -0.000576598 | 673 |
| TBILL.resultn | >= | 1.55 age.yrs              | <  | 51.51813826 Sodium.resultn | =  | Missing    | -0.001574022 | 673 |
| TBILL.resultn | >= | 1.55 age.yrs              | <  | 51.51813826 Sodium.resultn | <  | 139.5      | -0.00262337  | 673 |
| TBILL.resultn | >= | 1.55 age.yrs              | <  | 51.51813826 Sodium.resultn | >= | 139.5      | 0            | 673 |
| TBILL.resultn | >= | 1.55 age.yrs              | >= | 51.51813826                |    | Missing    | 0.001845719  | 673 |

|                |    |                           |    |                         |         |              |              |     |
|----------------|----|---------------------------|----|-------------------------|---------|--------------|--------------|-----|
| age.yrs        | =  | Missing                   |    |                         | Missing | 0.000279405  | 674          |     |
| age.yrs        | <  | 69.76043806 psc.yrs.dur   | =  | Missing                 | Missing | 8.28E-05     | 674          |     |
| age.yrs        | <  | 69.76043806 psc.yrs.dur   | <  | 6.410677618             | Missing | -0.000198394 | 674          |     |
| age.yrs        | <  | 69.76043806 psc.yrs.dur   | >= | 6.410677618 psc.yrs.dur | =       | Missing      | 0.001553492  | 674 |
| age.yrs        | <  | 69.76043806 psc.yrs.dur   | >= | 6.410677618 psc.yrs.dur | <       | 8.625598905  | 0.004660475  | 674 |
| age.yrs        | <  | 69.76043806 psc.yrs.dur   | >= | 6.410677618 psc.yrs.dur | >=      | 8.625598905  | 0            | 674 |
| age.yrs        | >= | 69.76043806               |    |                         | Missing | 0.004623178  | 674          |     |
| Sodium.resultn | =  | Missing                   |    |                         |         | -0.00163367  | 675          |     |
| Sodium.resultn | <  | 138.5 psc.yrs.dur         | =  | Missing                 |         | 0.000234905  | 675          |     |
| Sodium.resultn | <  | 138.5 psc.yrs.dur         | <  | 0.843258042             |         | -0.001202638 | 675          |     |
| Sodium.resultn | <  | 138.5 psc.yrs.dur         | >= | 0.843258042             |         | 0.002151628  | 675          |     |
| Sodium.resultn | >= | 138.5 TBILL.resultn       | =  | Missing                 |         | -0.001282737 | 675          |     |
| Sodium.resultn | >= | 138.5 TBILL.resultn       | <  | 1.65                    |         | -0.001471772 | 675          |     |
| Sodium.resultn | >= | 138.5 TBILL.resultn       | >= | 1.65                    |         | 0            | 675          |     |
| TBILL.resultn  | =  | Missing                   |    |                         |         | -0.000698254 | 676          |     |
| TBILL.resultn  | <  | 1.95 psc.yrs.dur          | =  | Missing                 |         | -0.001307276 | 676          |     |
| TBILL.resultn  | <  | 1.95 psc.yrs.dur          | <  | 1.916495551             |         | -0.001812756 | 676          |     |
| TBILL.resultn  | <  | 1.95 psc.yrs.dur          | >= | 1.916495551             |         | 0            | 676          |     |
| TBILL.resultn  | >= | 1.95 Hemoglobin.resultn   | =  | Missing                 |         | -0.000554005 | 676          |     |
| TBILL.resultn  | >= | 1.95 Hemoglobin.resultn   | <  | 12.75                   |         | 0.000583187  | 676          |     |
| TBILL.resultn  | >= | 1.95 Hemoglobin.resultn   | >= | 12.75                   |         | -0.001312133 | 676          |     |
| ALK.times.uln  | =  | Missing age.yrs           | =  | Missing                 |         | -0.001801454 | 677          |     |
| ALK.times.uln  | =  | Missing age.yrs           | <  | 53.46475017             |         | -0.002663019 | 677          |     |
| ALK.times.uln  | =  | Missing age.yrs           | >= | 53.46475017             |         | 0            | 677          |     |
| ALK.times.uln  | <  | 5.462893197 TBILL.resultn | =  | Missing                 |         | -0.002294447 | 677          |     |
| ALK.times.uln  | <  | 5.462893197 TBILL.resultn | <  | 2.7                     |         | -0.002463977 | 677          |     |
| ALK.times.uln  | <  | 5.462893197 TBILL.resultn | >= | 2.7                     |         | -0.00062175  | 677          |     |
| ALK.times.uln  | >= | 5.462893197               |    |                         |         | 0.000147909  | 677          |     |
| ALK.times.uln  | =  | Missing TBILL.resultn     | =  | Missing                 |         | 0            | 678          |     |
| ALK.times.uln  | =  | Missing TBILL.resultn     | <  | 1.26                    |         | -2.69E-05    | 678          |     |
| ALK.times.uln  | =  | Missing TBILL.resultn     | >= | 1.26                    |         | 0.004868748  | 678          |     |
| ALK.times.uln  | <  | 2.822501299               |    |                         |         | 0.000341061  | 678          |     |
| ALK.times.uln  | >= | 2.822501299 TBILL.resultn | =  | Missing                 |         | 0.001605855  | 678          |     |
| ALK.times.uln  | >= | 2.822501299 TBILL.resultn | <  | 0.85                    |         | -3.27E-05    | 678          |     |
| ALK.times.uln  | >= | 2.822501299 TBILL.resultn | >= | 0.85                    |         | 0.002278083  | 678          |     |
| PLT.resultn    | =  | Missing                   |    |                         | Missing | -0.003729469 | 679          |     |
| PLT.resultn    | <  | 183.5                     |    |                         | Missing | 0.000826723  | 679          |     |
| PLT.resultn    | >= | 183.5 age.yrs             | =  | Missing                 | Missing | -0.003081425 | 679          |     |
| PLT.resultn    | >= | 183.5 age.yrs             | <  | 51.9945243              | Missing | -0.003474321 | 679          |     |
| PLT.resultn    | >= | 183.5 age.yrs             | >= | 51.9945243 AST.resultn  | =       | Missing      | -0.002178991 | 679 |
| PLT.resultn    | >= | 183.5 age.yrs             | >= | 51.9945243 AST.resultn  | <       | 51.5         | -0.003710174 | 679 |
| PLT.resultn    | >= | 183.5 age.yrs             | >= | 51.9945243 AST.resultn  | >=      | 51.5         | 0            | 679 |
| ALB.resultn    | =  | Missing                   |    |                         | Missing | -0.004545879 | 680          |     |
| ALB.resultn    | <  | 2.915                     |    |                         | Missing | -0.000446823 | 680          |     |
| ALB.resultn    | >= | 2.915 psc.yrs.dur         | =  | Missing                 | Missing | -0.003966341 | 680          |     |
| ALB.resultn    | >= | 2.915 psc.yrs.dur         | <  | 6.262833676             | Missing | -0.004148654 | 680          |     |
| ALB.resultn    | >= | 2.915 psc.yrs.dur         | >= | 6.262833676 AST.resultn | =       | Missing      | -0.002696903 | 680 |
| ALB.resultn    | >= | 2.915 psc.yrs.dur         | >= | 6.262833676 AST.resultn | <       | 66.5         | -0.004551024 | 680 |
| ALB.resultn    | >= | 2.915 psc.yrs.dur         | >= | 6.262833676 AST.resultn | >=      | 66.5         | 0            | 680 |
| ALB.resultn    | =  | Missing                   |    |                         | Missing | -0.006047676 | 681          |     |
| ALB.resultn    | <  | 2.965                     |    |                         | Missing | -0.002271062 | 681          |     |
| ALB.resultn    | >= | 2.965 Sodium.resultn      | =  | Missing                 | Missing | -0.005725677 | 681          |     |
| ALB.resultn    | >= | 2.965 Sodium.resultn      | <  | 138.5 psc.yrs.dur       | =       | Missing      | -0.003769705 | 681 |
| ALB.resultn    | >= | 2.965 Sodium.resultn      | <  | 138.5 psc.yrs.dur       | <       | 1.890485969  | -0.005459573 | 681 |
| ALB.resultn    | >= | 2.965 Sodium.resultn      | <  | 138.5 psc.yrs.dur       | >=      | 1.890485969  | 0            | 681 |
| ALB.resultn    | >= | 2.965 Sodium.resultn      | >= | 138.5                   | Missing | -0.0056921   | 681          |     |
| ALK.times.uln  | =  | Missing TBILL.resultn     | =  | Missing                 |         | 0.001216689  | 682          |     |
| ALK.times.uln  | =  | Missing TBILL.resultn     | <  | 1.55                    |         | 0.000244928  | 682          |     |
| ALK.times.uln  | =  | Missing TBILL.resultn     | >= | 1.55                    |         | 0.005686793  | 682          |     |
| ALK.times.uln  | <  | 5.462893197               |    |                         |         | -0.000279823 | 682          |     |
| ALK.times.uln  | >= | 5.462893197 ALK.times.uln | =  | Missing                 |         | 0.001936416  | 682          |     |
| ALK.times.uln  | >= | 5.462893197 ALK.times.uln | <  | 8.257538256             |         | 0.003550095  | 682          |     |

|               |    |             |                    |    |             |                    |         |              |              |     |
|---------------|----|-------------|--------------------|----|-------------|--------------------|---------|--------------|--------------|-----|
| ALK.times.uln | >= | 5.462893197 | ALK.times.uln      | >= | 8.257538256 |                    |         | 0            | 682          |     |
| TBILL.resultn | =  | Missing     |                    |    |             |                    |         | 0.000550135  | 683          |     |
| TBILL.resultn | <  | 2.35        | Sodium.resultn     | =  | Missing     |                    |         | 0            | 683          |     |
| TBILL.resultn | <  | 2.35        | Sodium.resultn     | <  | 136.5       |                    |         | 0.002316899  | 683          |     |
| TBILL.resultn | <  | 2.35        | Sodium.resultn     | >= | 136.5       |                    |         | 0.000536658  | 683          |     |
| TBILL.resultn | >= | 2.35        | PLT.resultn        | =  | Missing     |                    |         | 0.001951201  | 683          |     |
| TBILL.resultn | >= | 2.35        | PLT.resultn        | <  | 245.5       |                    |         | 0.003040118  | 683          |     |
| TBILL.resultn | >= | 2.35        | PLT.resultn        | >= | 245.5       |                    |         | 0.000862283  | 683          |     |
| TBILL.resultn | =  | Missing     |                    |    |             |                    |         | -0.005795167 | 684          |     |
| TBILL.resultn | <  | 2.65        | age.yrs            | =  | Missing     |                    |         | -0.006278361 | 684          |     |
| TBILL.resultn | <  | 2.65        | age.yrs            | <  | 70.54620123 |                    |         | -0.006584623 | 684          |     |
| TBILL.resultn | <  | 2.65        | age.yrs            | >= | 70.54620123 |                    |         | 0            | 684          |     |
| TBILL.resultn | >= | 2.65        | psc.yrs.dur        | =  | Missing     |                    |         | -0.004764769 | 684          |     |
| TBILL.resultn | >= | 2.65        | psc.yrs.dur        | <  | 1.741273101 |                    |         | -0.006213483 | 684          |     |
| TBILL.resultn | >= | 2.65        | psc.yrs.dur        | >= | 1.741273101 |                    |         | -0.003171183 | 684          |     |
| ALB.resultn   | =  | Missing     |                    |    |             | Missing            |         | -0.0017065   | 685          |     |
| ALB.resultn   | <  | 3.105       |                    |    |             | Missing            |         | 0.000516679  | 685          |     |
| ALB.resultn   | >= | 3.105       | ALK.times.uln      | =  | Missing     | AST.resultn        | =       | Missing      | -0.001134614 | 685 |
| ALB.resultn   | >= | 3.105       | ALK.times.uln      | =  | Missing     | AST.resultn        | <       | 61           | -0.002138311 | 685 |
| ALB.resultn   | >= | 3.105       | ALK.times.uln      | =  | Missing     | AST.resultn        | >=      | 61           | 0            | 685 |
| ALB.resultn   | >= | 3.105       | ALK.times.uln      | <  | 5.412513212 |                    | Missing |              | -0.001736172 | 685 |
| ALB.resultn   | >= | 3.105       | ALK.times.uln      | >= | 5.412513212 |                    | Missing |              | 0.000190068  | 685 |
| TBILL.resultn | =  | Missing     |                    |    |             |                    |         | -0.001670766 | 686          |     |
| TBILL.resultn | <  | 2.05        | psc.yrs.dur        | =  | Missing     |                    |         | -0.001006478 | 686          |     |
| TBILL.resultn | <  | 2.05        | psc.yrs.dur        | <  | 2.05065024  |                    |         | -0.001432036 | 686          |     |
| TBILL.resultn | <  | 2.05        | psc.yrs.dur        | >= | 2.05065024  |                    |         | 0            | 686          |     |
| TBILL.resultn | >= | 2.05        | PLT.resultn        | =  | Missing     |                    |         | 5.95E-05     | 686          |     |
| TBILL.resultn | >= | 2.05        | PLT.resultn        | <  | 234.5       |                    |         | 0.001021602  | 686          |     |
| TBILL.resultn | >= | 2.05        | PLT.resultn        | >= | 234.5       |                    |         | -0.000754551 | 686          |     |
| ALB.resultn   | =  | Missing     |                    |    |             |                    |         | 0.000312781  | 687          |     |
| ALB.resultn   | <  | 3.31        | TBILL.resultn      | =  | Missing     |                    |         | 0.000623749  | 687          |     |
| ALB.resultn   | <  | 3.31        | TBILL.resultn      | <  | 1.31        |                    |         | -0.000314996 | 687          |     |
| ALB.resultn   | <  | 3.31        | TBILL.resultn      | >= | 1.31        |                    |         | 0.001844117  | 687          |     |
| ALB.resultn   | >= | 3.31        | TBILL.resultn      | =  | Missing     |                    |         | -0.000495618 | 687          |     |
| ALB.resultn   | >= | 3.31        | TBILL.resultn      | <  | 0.75        |                    |         | -0.000986425 | 687          |     |
| ALB.resultn   | >= | 3.31        | TBILL.resultn      | >= | 0.75        |                    |         | 0            | 687          |     |
| ALK.times.uln | =  | Missing     | TBILL.resultn      | =  | Missing     |                    |         | -0.0003572   | 688          |     |
| ALK.times.uln | =  | Missing     | TBILL.resultn      | <  | 1.15        |                    |         | -0.000346339 | 688          |     |
| ALK.times.uln | =  | Missing     | TBILL.resultn      | >= | 1.15        |                    |         | 0.00266796   | 688          |     |
| ALK.times.uln | <  | 6.02        | Sodium.resultn     | =  | Missing     |                    |         | 0            | 688          |     |
| ALK.times.uln | <  | 6.02        | Sodium.resultn     | <  | 137.5       |                    |         | 0.00179794   | 688          |     |
| ALK.times.uln | <  | 6.02        | Sodium.resultn     | >= | 137.5       |                    |         | -0.000356694 | 688          |     |
| ALK.times.uln | >= | 6.02        |                    |    |             |                    |         | 0.002723835  | 688          |     |
| TBILL.resultn | =  | Missing     |                    |    |             | Missing            |         | -0.001486347 | 689          |     |
| TBILL.resultn | <  | 0.95        |                    |    |             | Missing            |         | -0.003251497 | 689          |     |
| TBILL.resultn | >= | 0.95        | Hemoglobin.resultn | =  | Missing     |                    |         | 0.000366132  | 689          |     |
| TBILL.resultn | >= | 0.95        | Hemoglobin.resultn | <  | 13.35       | ALB.resultn        | =       | Missing      | -0.00132847  | 689 |
| TBILL.resultn | >= | 0.95        | Hemoglobin.resultn | <  | 13.35       | ALB.resultn        | <       | 3.54         | -0.002562049 | 689 |
| TBILL.resultn | >= | 0.95        | Hemoglobin.resultn | <  | 13.35       | ALB.resultn        | >=      | 3.54         | 0            | 689 |
| TBILL.resultn | >= | 0.95        | Hemoglobin.resultn | >= | 13.35       |                    | Missing |              | -0.002870442 | 689 |
| ALB.resultn   | =  | Missing     |                    |    |             |                    | Missing |              | -0.002491661 | 690 |
| ALB.resultn   | <  | 2.95        |                    |    |             |                    | Missing |              | 0.00090147   | 690 |
| ALB.resultn   | >= | 2.95        | TBILL.resultn      | =  | Missing     |                    | Missing |              | -0.001914858 | 690 |
| ALB.resultn   | >= | 2.95        | TBILL.resultn      | <  | 0.95        |                    | Missing |              | -0.002337096 | 690 |
| ALB.resultn   | >= | 2.95        | TBILL.resultn      | >= | 0.95        | Hemoglobin.resultn | =       | Missing      | 0            | 690 |
| ALB.resultn   | >= | 2.95        | TBILL.resultn      | >= | 0.95        | Hemoglobin.resultn | <       | 13.35        | -0.00039254  | 690 |
| ALB.resultn   | >= | 2.95        | TBILL.resultn      | >= | 0.95        | Hemoglobin.resultn | >=      | 13.35        | -0.002511293 | 690 |
| ALB.resultn   | =  | Missing     |                    |    |             |                    | Missing |              | 0.000236952  | 691 |
| ALB.resultn   | <  | 3.175       |                    |    |             |                    | Missing |              | 0.002076839  | 691 |
| ALB.resultn   | >= | 3.175       | TBILL.resultn      | =  | Missing     |                    | Missing |              | 0.000110567  | 691 |
| ALB.resultn   | >= | 3.175       | TBILL.resultn      | <  | 0.75        |                    | Missing |              | -0.000492685 | 691 |
| ALB.resultn   | >= | 3.175       | TBILL.resultn      | >= | 0.75        | Sodium.resultn     | =       | Missing      | 0            | 691 |

|                |    |             |               |    |             |                |    |             |              |     |
|----------------|----|-------------|---------------|----|-------------|----------------|----|-------------|--------------|-----|
| ALB.resultn    | >= | 3.175       | TBILL.resultn | >= | 0.75        | Sodium.resultn | <  | 137.5       | 0.003078023  | 691 |
| ALB.resultn    | >= | 3.175       | TBILL.resultn | >= | 0.75        | Sodium.resultn | >= | 137.5       | 0.000394626  | 691 |
| AST.resultn    | =  | Missing     |               |    |             |                |    | Missing     | -0.005591921 | 692 |
| AST.resultn    | <  | 43          |               |    |             |                |    | Missing     | -0.005574275 | 692 |
| AST.resultn    | >= | 43          | age.yrs       | =  | Missing     |                |    | Missing     | -0.003973065 | 692 |
| AST.resultn    | >= | 43          | age.yrs       | <  | 56.10403833 |                |    | Missing     | -0.004511905 | 692 |
| AST.resultn    | >= | 43          | age.yrs       | >= | 56.10403833 | TBILL.resultn  | =  | Missing     | -0.002134667 | 692 |
| AST.resultn    | >= | 43          | age.yrs       | >= | 56.10403833 | TBILL.resultn  | <  | 1.26        | -0.003202    | 692 |
| AST.resultn    | >= | 43          | age.yrs       | >= | 56.10403833 | TBILL.resultn  | >= | 1.26        | 0            | 692 |
| PLT.resultn    | =  | Missing     |               |    |             |                |    | Missing     | -0.003765648 | 693 |
| PLT.resultn    | <  | 249.5       | AST.resultn   | =  | Missing     |                |    | Missing     | -0.00278547  | 693 |
| PLT.resultn    | <  | 249.5       | AST.resultn   | <  | 54.5        |                |    | Missing     | -0.004088172 | 693 |
| PLT.resultn    | <  | 249.5       | AST.resultn   | >= | 54.5        | age.yrs        | =  | Missing     | -0.001825585 | 693 |
| PLT.resultn    | <  | 249.5       | AST.resultn   | >= | 54.5        | age.yrs        | <  | 51.58521561 | -0.003153283 | 693 |
| PLT.resultn    | <  | 249.5       | AST.resultn   | >= | 54.5        | age.yrs        | >= | 51.58521561 | 0            | 693 |
| PLT.resultn    | >= | 249.5       |               |    |             |                |    | Missing     | -0.003757038 | 693 |
| age.yrs        | =  | Missing     |               |    |             |                |    | Missing     | -0.002144129 | 694 |
| age.yrs        | <  | 51.63175907 |               |    |             |                |    | Missing     | -0.002586886 | 694 |
| age.yrs        | >= | 51.63175907 | TBILL.resultn | =  | Missing     |                |    | Missing     | -0.00114509  | 694 |
| age.yrs        | >= | 51.63175907 | TBILL.resultn | <  | 1.25        | TBILL.resultn  | =  | Missing     | -0.001581062 | 694 |
| age.yrs        | >= | 51.63175907 | TBILL.resultn | <  | 1.25        | TBILL.resultn  | <  | 0.75        | -0.002865674 | 694 |
| age.yrs        | >= | 51.63175907 | TBILL.resultn | <  | 1.25        | TBILL.resultn  | >= | 0.75        | 0            | 694 |
| age.yrs        | >= | 51.63175907 | TBILL.resultn | >= | 1.25        |                |    | Missing     | 0.000435308  | 694 |
| age.yrs        | =  | Missing     |               |    |             |                |    | Missing     | -0.003264252 | 695 |
| age.yrs        | <  | 49.41957563 |               |    |             |                |    | Missing     | -0.0036014   | 695 |
| age.yrs        | >= | 49.41957563 | AST.resultn   | =  | Missing     |                |    | Missing     | -0.002605635 | 695 |
| age.yrs        | >= | 49.41957563 | AST.resultn   | <  | 51          |                |    | Missing     | -0.004023636 | 695 |
| age.yrs        | >= | 49.41957563 | AST.resultn   | >= | 51          | psc.yrs.dur    | =  | Missing     | -0.001439724 | 695 |
| age.yrs        | >= | 49.41957563 | AST.resultn   | >= | 51          | psc.yrs.dur    | <  | 0.444900753 | -0.00294489  | 695 |
| age.yrs        | >= | 49.41957563 | AST.resultn   | >= | 51          | psc.yrs.dur    | >= | 0.444900753 | 0            | 695 |
| TBILL.resultn  | =  | Missing     |               |    |             |                |    |             | -0.002151868 | 696 |
| TBILL.resultn  | <  | 2.65        | age.yrs       | =  | Missing     |                |    |             | -0.001516143 | 696 |
| TBILL.resultn  | <  | 2.65        | age.yrs       | <  | 60.37919233 |                |    |             | -0.001804539 | 696 |
| TBILL.resultn  | <  | 2.65        | age.yrs       | >= | 60.37919233 |                |    |             | 0            | 696 |
| TBILL.resultn  | >= | 2.65        | psc.yrs.dur   | =  | Missing     |                |    |             | 0.00057177   | 696 |
| TBILL.resultn  | >= | 2.65        | psc.yrs.dur   | <  | 2.585900068 |                |    |             | -0.000883705 | 696 |
| TBILL.resultn  | >= | 2.65        | psc.yrs.dur   | >= | 2.585900068 |                |    |             | 0.002172794  | 696 |
| PLT.resultn    | =  | Missing     |               |    |             |                |    | Missing     | -0.000189641 | 697 |
| PLT.resultn    | <  | 183.5       |               |    |             |                |    | Missing     | 0.002471826  | 697 |
| PLT.resultn    | >= | 183.5       | psc.yrs.dur   | =  | Missing     |                |    | Missing     | -0.000341023 | 697 |
| PLT.resultn    | >= | 183.5       | psc.yrs.dur   | <  | 8.202600958 |                |    | Missing     | -0.000473295 | 697 |
| PLT.resultn    | >= | 183.5       | psc.yrs.dur   | >= | 8.202600958 | psc.yrs.dur    | =  | Missing     | 0.000753226  | 697 |
| PLT.resultn    | >= | 183.5       | psc.yrs.dur   | >= | 8.202600958 | psc.yrs.dur    | <  | 12.34223135 | 0.001657097  | 697 |
| PLT.resultn    | >= | 183.5       | psc.yrs.dur   | >= | 8.202600958 | psc.yrs.dur    | >= | 12.34223135 | 0            | 697 |
| Sodium.resultn | =  | Missing     |               |    |             |                |    |             | -0.005236726 | 698 |
| Sodium.resultn | <  | 136.5       | psc.yrs.dur   | =  | Missing     |                |    |             | -0.002081189 | 698 |
| Sodium.resultn | <  | 136.5       | psc.yrs.dur   | <  | 1.054072553 |                |    |             | -0.004162377 | 698 |
| Sodium.resultn | <  | 136.5       | psc.yrs.dur   | >= | 1.054072553 |                |    |             | 0            | 698 |
| Sodium.resultn | >= | 136.5       | ALB.resultn   | =  | Missing     |                |    |             | -0.00502297  | 698 |
| Sodium.resultn | >= | 136.5       | ALB.resultn   | <  | 3.135       |                |    |             | -0.003104752 | 698 |
| Sodium.resultn | >= | 136.5       | ALB.resultn   | >= | 3.135       |                |    |             | -0.005171669 | 698 |
| ALK.times.uln  | =  | Missing     | ALB.resultn   | =  | Missing     |                |    |             | -0.002870397 | 699 |
| ALK.times.uln  | =  | Missing     | ALB.resultn   | <  | 3.95        |                |    |             | -0.000505001 | 699 |
| ALK.times.uln  | =  | Missing     | ALB.resultn   | >= | 3.95        |                |    |             | -0.0028672   | 699 |
| ALK.times.uln  | <  | 6.02        | psc.yrs.dur   | =  | Missing     |                |    |             | -0.00225973  | 699 |
| ALK.times.uln  | <  | 6.02        | psc.yrs.dur   | <  | 9.453798768 |                |    |             | -0.002416063 | 699 |
| ALK.times.uln  | <  | 6.02        | psc.yrs.dur   | >= | 9.453798768 |                |    |             | 0            | 699 |
| ALK.times.uln  | >= | 6.02        |               |    |             |                |    |             | 0.000469836  | 699 |
| TBILL.resultn  | =  | Missing     |               |    |             |                |    |             | 0.000594827  | 700 |
| TBILL.resultn  | <  | 2.2         | AST.resultn   | =  | Missing     |                |    |             | -0.00068185  | 700 |
| TBILL.resultn  | <  | 2.2         | AST.resultn   | <  | 49.5        |                |    |             | -0.001290644 | 700 |
| TBILL.resultn  | <  | 2.2         | AST.resultn   | >= | 49.5        |                |    |             | 0            | 700 |



|               |    |                            |         |                          |               |             |              |              |     |
|---------------|----|----------------------------|---------|--------------------------|---------------|-------------|--------------|--------------|-----|
| TBILI.resultn | >= | 2.2 ALK.times.uln          | =       | Missing                  |               |             | 0.000428471  | 700          |     |
| TBILI.resultn | >= | 2.2 ALK.times.uln          | <       | 3.319906813              |               |             | 2.35E-05     | 700          |     |
| TBILI.resultn | >= | 2.2 ALK.times.uln          | >=      | 3.319906813              |               |             | 0.000765924  | 700          |     |
| ALB.resultn   | =  | Missing                    |         |                          |               | Missing     | -0.003128021 | 701          |     |
| ALB.resultn   | <  | 2.965                      |         |                          |               | Missing     | 0.000184632  | 701          |     |
| ALB.resultn   | >= | 2.965 Hemoglobin.resultn   | =       | Missing                  | TBILI.resultn | =           | Missing      | -0.002457798 | 701 |
| ALB.resultn   | >= | 2.965 Hemoglobin.resultn   | =       | Missing                  | TBILI.resultn | <           | 1.1          | -0.003370695 | 701 |
| ALB.resultn   | >= | 2.965 Hemoglobin.resultn   | =       | Missing                  | TBILI.resultn | >=          | 1.1          | 0            | 701 |
| ALB.resultn   | >= | 2.965 Hemoglobin.resultn   | <       | 12.55                    |               | Missing     | -0.003484944 | 701          |     |
| ALB.resultn   | >= | 2.965 Hemoglobin.resultn   | >=      | 12.55                    |               | Missing     | -0.003372192 | 701          |     |
| AST.resultn   | =  | Missing                    |         |                          |               | Missing     | -0.001239915 | 702          |     |
| AST.resultn   | <  | 47.5                       |         |                          |               | Missing     | -0.002047828 | 702          |     |
| AST.resultn   | >= | 47.5 age.yrs               | =       | Missing                  |               | Missing     | -0.000586455 | 702          |     |
| AST.resultn   | >= | 47.5 age.yrs               | <       | 62.47091034 psc.yrs.dur  | =             | Missing     | -0.001072129 | 702          |     |
| AST.resultn   | >= | 47.5 age.yrs               | <       | 62.47091034 psc.yrs.dur  | <             | 1.961670089 | -0.001540416 | 702          |     |
| AST.resultn   | >= | 47.5 age.yrs               | <       | 62.47091034 psc.yrs.dur  | >=            | 1.961670089 | 0            | 702          |     |
| AST.resultn   | >= | 47.5 age.yrs               | >=      | 62.47091034              |               | Missing     | 0.004932567  | 702          |     |
| TBILI.resultn | =  | Missing                    |         |                          |               |             | -0.005225928 | 703          |     |
| TBILI.resultn | <  | 2.45 age.yrs               | =       | Missing                  |               |             | -0.004447774 | 703          |     |
| TBILI.resultn | <  | 2.45 age.yrs               | <       | 69.3798768               |               |             | -0.004657575 | 703          |     |
| TBILI.resultn | <  | 2.45 age.yrs               | >=      | 69.3798768               |               |             | 0            | 703          |     |
| TBILI.resultn | >= | 2.45 psc.yrs.dur           | =       | Missing                  |               |             | -0.002776541 | 703          |     |
| TBILI.resultn | >= | 2.45 psc.yrs.dur           | <       | 1.659137577              |               |             | -0.003649633 | 703          |     |
| TBILI.resultn | >= | 2.45 psc.yrs.dur           | >=      | 1.659137577              |               |             | -0.001903449 | 703          |     |
| psc.yrs.dur   | =  | Missing                    |         |                          |               |             | 0.0008222811 | 704          |     |
| psc.yrs.dur   | <  | 6.410677618 Sodium.resultn | =       | Missing                  |               |             | 0            | 704          |     |
| psc.yrs.dur   | <  | 6.410677618 Sodium.resultn | <       | 138.5                    |               |             | 0.001733897  | 704          |     |
| psc.yrs.dur   | <  | 6.410677618 Sodium.resultn | >=      | 138.5                    |               |             | 0.000637675  | 704          |     |
| psc.yrs.dur   | >= | 6.410677618 AST.resultn    | =       | Missing                  |               |             | 0.002272964  | 704          |     |
| psc.yrs.dur   | >= | 6.410677618 AST.resultn    | <       | 43                       |               |             | 2.21E-05     | 704          |     |
| psc.yrs.dur   | >= | 6.410677618 AST.resultn    | >=      | 43                       |               |             | 0.004523845  | 704          |     |
| ALB.resultn   | =  | Missing                    |         |                          |               | Missing     | -0.002012027 | 705          |     |
| ALB.resultn   | <  | 3.62 PLT.resultn           | =       | Missing                  |               | Missing     | -0.000242972 | 705          |     |
| ALB.resultn   | <  | 3.62 PLT.resultn           | <       | 249.5                    |               | Missing     | 0.001190945  | 705          |     |
| ALB.resultn   | <  | 3.62 PLT.resultn           | >=      | 249.5 Hemoglobin.resultn | =             | Missing     | -0.001021385 | 705          |     |
| ALB.resultn   | <  | 3.62 PLT.resultn           | >=      | 249.5 Hemoglobin.resultn | <             | 12.75       | -0.001532077 | 705          |     |
| ALB.resultn   | <  | 3.62 PLT.resultn           | >=      | 249.5 Hemoglobin.resultn | >=            | 12.75       | 0            | 705          |     |
| ALB.resultn   | >= | 3.62                       |         |                          |               | Missing     | -0.00150439  | 705          |     |
| ALB.resultn   | =  | Missing                    |         |                          |               | Missing     | -0.000762273 | 706          |     |
| ALB.resultn   | <  | 3.225                      |         |                          |               | Missing     | 0.000598499  | 706          |     |
| ALB.resultn   | >= | 3.225 PLT.resultn          | =       | Missing                  |               | Missing     | -0.001035807 | 706          |     |
| ALB.resultn   | >= | 3.225 PLT.resultn          | <       | 267.5 ALK.times.uln      | =             | Missing     | 0            | 706          |     |
| ALB.resultn   | >= | 3.225 PLT.resultn          | <       | 267.5 ALK.times.uln      | <             | 3.003845488 | -0.001376849 | 706          |     |
| ALB.resultn   | >= | 3.225 PLT.resultn          | <       | 267.5 ALK.times.uln      | >=            | 3.003845488 | 0.001609878  | 706          |     |
| ALB.resultn   | >= | 3.225 PLT.resultn          | >=      | 267.5                    |               | Missing     | -0.001498088 | 706          |     |
| ALB.resultn   | =  | Missing                    |         |                          |               | Missing     | -0.001465541 | 707          |     |
| ALB.resultn   | <  | 2.825                      |         |                          |               | Missing     | 0.000331005  | 707          |     |
| ALB.resultn   | >= | 2.825 age.yrs              | =       | Missing                  |               | Missing     | -0.001819347 | 707          |     |
| ALB.resultn   | >= | 2.825 age.yrs              | <       | 49.03353867              |               | Missing     | -0.002204451 | 707          |     |
| ALB.resultn   | >= | 2.825 age.yrs              | >=      | 49.03353867 AST.resultn  | =             | Missing     | -0.001237315 | 707          |     |
| ALB.resultn   | >= | 2.825 age.yrs              | >=      | 49.03353867 AST.resultn  | <             | 51.5        | -0.002364646 | 707          |     |
| ALB.resultn   | >= | 2.825 age.yrs              | >=      | 49.03353867 AST.resultn  | >=            | 51.5        | 0            | 707          |     |
| TBILI.resultn | =  | Missing                    |         |                          |               |             | -0.00169299  | 708          |     |
| TBILI.resultn | <  | 2.05 age.yrs               | =       | Missing                  |               |             | -0.00277737  | 708          |     |
| TBILI.resultn | <  | 2.05 age.yrs               | <       | 62.51608487              |               |             | -0.003122742 | 708          |     |
| TBILI.resultn | <  | 2.05 age.yrs               | >=      | 62.51608487              |               |             | 0            | 708          |     |
| TBILI.resultn | >= | 2.05 Hemoglobin.resultn    | =       | Missing                  |               |             | -0.002292013 | 708          |     |
| TBILI.resultn | >= | 2.05 Hemoglobin.resultn    | <       | 12.95                    |               |             | -0.001010095 | 708          |     |
| TBILI.resultn | >= | 2.05 Hemoglobin.resultn    | >=      | 12.95                    |               |             | -0.003573931 | 708          |     |
| ALK.times.uln | =  | Missing                    | age.yrs | =                        | Missing       |             | -0.001288789 | 709          |     |
| ALK.times.uln | =  | Missing                    | age.yrs | <                        | 53.46475017   |             | -0.001888225 | 709          |     |
| ALK.times.uln | =  | Missing                    | age.yrs | >=                       | 53.46475017   |             | 0            | 709          |     |

|                |    |             |                    |    |             |                    |         |         |              |     |
|----------------|----|-------------|--------------------|----|-------------|--------------------|---------|---------|--------------|-----|
| ALK.times.uln  | <  | 2.822501299 |                    |    |             |                    |         |         | -0.001672855 | 709 |
| ALK.times.uln  | >= | 2.822501299 | Sodium.resultn     | =  | Missing     |                    |         |         | -0.000531904 | 709 |
| ALK.times.uln  | >= | 2.822501299 | Sodium.resultn     | <  | 138.5       |                    |         |         | 0.001795456  | 709 |
| ALK.times.uln  | >= | 2.822501299 | Sodium.resultn     | >= | 138.5       |                    |         |         | -0.000727311 | 709 |
| PLT.resultn    | =  | Missing     |                    |    |             |                    |         |         | 0.000142761  | 710 |
| PLT.resultn    | <  | 210.5       | TBILL.resultn      | =  | Missing     |                    |         |         | 0.0018971    | 710 |
| PLT.resultn    | <  | 210.5       | TBILL.resultn      | <  | 1.55        |                    |         |         | 0.001009972  | 710 |
| PLT.resultn    | <  | 210.5       | TBILL.resultn      | >= | 1.55        |                    |         |         | 0.004558482  | 710 |
| PLT.resultn    | >= | 210.5       | Sodium.resultn     | =  | Missing     |                    |         |         | 0            | 710 |
| PLT.resultn    | >= | 210.5       | Sodium.resultn     | <  | 137.5       |                    |         |         | 0.002105843  | 710 |
| PLT.resultn    | >= | 210.5       | Sodium.resultn     | >= | 137.5       |                    |         |         | 3.55E-05     | 710 |
| TBILL.resultn  | =  | Missing     |                    |    |             |                    |         |         | -0.001237801 | 711 |
| TBILL.resultn  | <  | 1.9         | age.yrs            | =  | Missing     |                    |         |         | -0.001357395 | 711 |
| TBILL.resultn  | <  | 1.9         | age.yrs            | <  | 55.77138946 |                    |         |         | -0.001720983 | 711 |
| TBILL.resultn  | <  | 1.9         | age.yrs            | >= | 55.77138946 |                    |         |         | 0            | 711 |
| TBILL.resultn  | >= | 1.9         | PLT.resultn        | =  | Missing     |                    |         |         | 3.56E-05     | 711 |
| TBILL.resultn  | >= | 1.9         | PLT.resultn        | <  | 224.5       |                    |         |         | 0.00060914   | 711 |
| TBILL.resultn  | >= | 1.9         | PLT.resultn        | >= | 224.5       |                    |         |         | -0.00034684  | 711 |
| TBILL.resultn  | =  | Missing     |                    |    |             |                    |         |         | 0.000462617  | 712 |
| TBILL.resultn  | <  | 2.35        | ALK.times.uln      | =  | Missing     |                    |         |         | 0            | 712 |
| TBILL.resultn  | <  | 2.35        | ALK.times.uln      | <  | 6.115825908 |                    |         |         | -0.000573199 | 712 |
| TBILL.resultn  | <  | 2.35        | ALK.times.uln      | >= | 6.115825908 |                    |         |         | 0.001954705  | 712 |
| TBILL.resultn  | >= | 2.35        | age.yrs            | =  | Missing     |                    |         |         | 0.000739025  | 712 |
| TBILL.resultn  | >= | 2.35        | age.yrs            | <  | 50.63244353 |                    |         |         | -5.65E-05    | 712 |
| TBILL.resultn  | >= | 2.35        | age.yrs            | >= | 50.63244353 |                    |         |         | 0.001534574  | 712 |
| PLT.resultn    | =  | Missing     |                    |    |             |                    | Missing |         | 0.000334769  | 713 |
| PLT.resultn    | <  | 185.5       |                    |    |             |                    | Missing |         | 0.004499244  | 713 |
| PLT.resultn    | >= | 185.5       | age.yrs            | =  | Missing     |                    | Missing |         | 0.000598423  | 713 |
| PLT.resultn    | >= | 185.5       | age.yrs            | <  | 69.84257358 | PLT.resultn        | =       | Missing | 0.000313621  | 713 |
| PLT.resultn    | >= | 185.5       | age.yrs            | <  | 69.84257358 | PLT.resultn        | <       | 234.5   | 0.001180691  | 713 |
| PLT.resultn    | >= | 185.5       | age.yrs            | <  | 69.84257358 | PLT.resultn        | >=      | 234.5   | 0            | 713 |
| PLT.resultn    | >= | 185.5       | age.yrs            | >= | 69.84257358 |                    |         | Missing | 0.005569508  | 713 |
| AST.resultn    | =  | Missing     |                    |    |             |                    |         | Missing | -0.004022654 | 714 |
| AST.resultn    | <  | 43          |                    |    |             |                    |         | Missing | -0.004021436 | 714 |
| AST.resultn    | >= | 43          | TBILL.resultn      | =  | Missing     |                    |         | Missing | -0.002730246 | 714 |
| AST.resultn    | >= | 43          | TBILL.resultn      | <  | 0.75        |                    |         | Missing | -0.004018767 | 714 |
| AST.resultn    | >= | 43          | TBILL.resultn      | >= | 0.75        | Hemoglobin.resultn | =       | Missing | 0            | 714 |
| AST.resultn    | >= | 43          | TBILL.resultn      | >= | 0.75        | Hemoglobin.resultn | <       | 13.75   | -0.002120094 | 714 |
| AST.resultn    | >= | 43          | TBILL.resultn      | >= | 0.75        | Hemoglobin.resultn | >=      | 13.75   | -0.002978139 | 714 |
| age.yrs        | =  | Missing     |                    |    |             |                    |         | Missing | -0.000647408 | 715 |
| age.yrs        | <  | 54.39972621 |                    |    |             |                    |         | Missing | -0.000974396 | 715 |
| age.yrs        | >= | 54.39972621 | AST.resultn        | =  | Missing     |                    |         | Missing | 0.000409852  | 715 |
| age.yrs        | >= | 54.39972621 | AST.resultn        | <  | 51.5        |                    |         | Missing | -0.001365128 | 715 |
| age.yrs        | >= | 54.39972621 | AST.resultn        | >= | 51.5        | PLT.resultn        | =       | Missing | 0.001593173  | 715 |
| age.yrs        | >= | 54.39972621 | AST.resultn        | >= | 51.5        | PLT.resultn        | <       | 251.5   | 0.002351826  | 715 |
| age.yrs        | >= | 54.39972621 | AST.resultn        | >= | 51.5        | PLT.resultn        | >=      | 251.5   | 0            | 715 |
| TBILL.resultn  | =  | Missing     |                    |    |             |                    |         | Missing | 0.001354305  | 716 |
| TBILL.resultn  | <  | 1.25        |                    |    |             |                    |         | Missing | 0.000269068  | 716 |
| TBILL.resultn  | >= | 1.25        | Hemoglobin.resultn | =  | Missing     |                    |         | Missing | 0.004862126  | 716 |
| TBILL.resultn  | >= | 1.25        | Hemoglobin.resultn | <  | 12.15       |                    |         | Missing | 0.002318586  | 716 |
| TBILL.resultn  | >= | 1.25        | Hemoglobin.resultn | >= | 12.15       | Sodium.resultn     | =       | Missing | 4.17E-05     | 716 |
| TBILL.resultn  | >= | 1.25        | Hemoglobin.resultn | >= | 12.15       | Sodium.resultn     | <       | 139.5   | 8.34E-05     | 716 |
| TBILL.resultn  | >= | 1.25        | Hemoglobin.resultn | >= | 12.15       | Sodium.resultn     | >=      | 139.5   | 0            | 716 |
| ALB.resultn    | =  | Missing     |                    |    |             |                    |         |         | -0.001222738 | 717 |
| ALB.resultn    | <  | 3.31        | psc.yrs.dur        | =  | Missing     |                    |         |         | 0.001113587  | 717 |
| ALB.resultn    | <  | 3.31        | psc.yrs.dur        | <  | 0.735112936 |                    |         |         | -0.000470362 | 717 |
| ALB.resultn    | <  | 3.31        | psc.yrs.dur        | >= | 0.735112936 |                    |         |         | 0.002433545  | 717 |
| ALB.resultn    | >= | 3.31        | TBILL.resultn      | =  | Missing     |                    |         |         | -0.00059888  | 717 |
| ALB.resultn    | >= | 3.31        | TBILL.resultn      | <  | 0.75        |                    |         |         | -0.001234055 | 717 |
| ALB.resultn    | >= | 3.31        | TBILL.resultn      | >= | 0.75        |                    |         |         | 0            | 717 |
| Sodium.resultn | =  | Missing     |                    |    |             |                    |         | Missing | 0.000316349  | 718 |
| Sodium.resultn | <  | 136.5       |                    |    |             |                    |         | Missing | 0.003226749  | 718 |

|                |    |             |               |    |             |                |         |              |              |     |
|----------------|----|-------------|---------------|----|-------------|----------------|---------|--------------|--------------|-----|
| Sodium.resultn | >= | 136.5       | ALK.times.uln | =  | Missing     |                | Missing | 0.001024591  | 718          |     |
| Sodium.resultn | >= | 136.5       | ALK.times.uln | <  | 6.02        | PLT.resultn    | =       | Missing      | 0.000696475  | 718 |
| Sodium.resultn | >= | 136.5       | ALK.times.uln | <  | 6.02        | PLT.resultn    | <       | 250          | 0.001776011  | 718 |
| Sodium.resultn | >= | 136.5       | ALK.times.uln | <  | 6.02        | PLT.resultn    | >=      | 250          | 0            | 718 |
| Sodium.resultn | >= | 136.5       | ALK.times.uln | >= | 6.02        |                | Missing | 0.002160682  | 718          |     |
| TBILI.resultn  | =  | Missing     |               |    |             |                |         | 0.001024619  | 719          |     |
| TBILI.resultn  | <  | 1.55        | PLT.resultn   | =  | Missing     |                |         | 0            | 719          |     |
| TBILI.resultn  | <  | 1.55        | PLT.resultn   | <  | 185.5       |                |         | 0.002868271  | 719          |     |
| TBILI.resultn  | <  | 1.55        | PLT.resultn   | >= | 185.5       |                |         | 0.000281769  | 719          |     |
| TBILI.resultn  | >= | 1.55        | PLT.resultn   | =  | Missing     |                |         | 0.001500177  | 719          |     |
| TBILI.resultn  | >= | 1.55        | PLT.resultn   | <  | 217         |                |         | 0.003694389  | 719          |     |
| TBILI.resultn  | >= | 1.55        | PLT.resultn   | >= | 217         |                |         | 0.000524971  | 719          |     |
| TBILI.resultn  | =  | Missing     |               |    |             |                |         | -0.002811284 | 720          |     |
| TBILI.resultn  | <  | 1.95        | psc.yrs.dur   | =  | Missing     |                |         | -0.002195706 | 720          |     |
| TBILI.resultn  | <  | 1.95        | psc.yrs.dur   | <  | 6.410677618 |                |         | -0.002521443 | 720          |     |
| TBILI.resultn  | <  | 1.95        | psc.yrs.dur   | >= | 6.410677618 |                |         | 0            | 720          |     |
| TBILI.resultn  | >= | 1.95        | PLT.resultn   | =  | Missing     |                |         | -0.001041975 | 720          |     |
| TBILI.resultn  | >= | 1.95        | PLT.resultn   | <  | 220.5       |                |         | 0.000192455  | 720          |     |
| TBILI.resultn  | >= | 1.95        | PLT.resultn   | >= | 220.5       |                |         | -0.001985951 | 720          |     |
| ALK.times.uln  | =  | Missing     | TBILI.resultn | =  | Missing     |                |         | -0.002066119 | 721          |     |
| ALK.times.uln  | =  | Missing     | TBILI.resultn | <  | 1.15        |                |         | -0.001639948 | 721          |     |
| ALK.times.uln  | =  | Missing     | TBILI.resultn | >= | 1.15        |                |         | 7.87E-05     | 721          |     |
| ALK.times.uln  | <  | 7.298842968 | age.yrs       | =  | Missing     |                |         | -0.001495869 | 721          |     |
| ALK.times.uln  | <  | 7.298842968 | age.yrs       | <  | 55.20054757 |                |         | -0.001867184 | 721          |     |
| ALK.times.uln  | <  | 7.298842968 | age.yrs       | >= | 55.20054757 |                |         | 0            | 721          |     |
| ALK.times.uln  | >= | 7.298842968 |               |    |             |                |         | 0.000517868  | 721          |     |
| ALB.resultn    | =  | Missing     |               |    |             |                | Missing | -0.000362365 | 722          |     |
| ALB.resultn    | <  | 2.89        |               |    |             |                | Missing | 0.001856171  | 722          |     |
| ALB.resultn    | >= | 2.89        | psc.yrs.dur   | =  | Missing     |                | Missing | -0.000567949 | 722          |     |
| ALB.resultn    | >= | 2.89        | psc.yrs.dur   | <  | 1.351129363 |                | Missing | -0.001221715 | 722          |     |
| ALB.resultn    | >= | 2.89        | psc.yrs.dur   | >= | 1.351129363 | Sodium.resultn | =       | Missing      | 0            | 722 |
| ALB.resultn    | >= | 2.89        | psc.yrs.dur   | >= | 1.351129363 | Sodium.resultn | <       | 138.5        | 0.004867268  | 722 |
| ALB.resultn    | >= | 2.89        | psc.yrs.dur   | >= | 1.351129363 | Sodium.resultn | >=      | 138.5        | -0.000554423 | 722 |
| ALK.times.uln  | =  | Missing     | TBILI.resultn | =  | Missing     |                |         | 0            | 723          |     |
| ALK.times.uln  | =  | Missing     | TBILI.resultn | <  | 0.95        |                |         | -2.56E-05    | 723          |     |
| ALK.times.uln  | =  | Missing     | TBILI.resultn | >= | 0.95        |                |         | 0.002464037  | 723          |     |
| ALK.times.uln  | <  | 5.462893197 |               |    |             |                |         | 0.000558781  | 723          |     |
| ALK.times.uln  | >= | 5.462893197 | AST.resultn   | =  | Missing     |                |         | 0.00246727   | 723          |     |
| ALK.times.uln  | >= | 5.462893197 | AST.resultn   | <  | 112.5       |                |         | 0.004139265  | 723          |     |
| ALK.times.uln  | >= | 5.462893197 | AST.resultn   | >= | 112.5       |                |         | 0.001272987  | 723          |     |
| age.yrs        | =  | Missing     |               |    |             |                | Missing | 0.00077247   | 724          |     |
| age.yrs        | <  | 53.33333333 |               |    |             |                | Missing | 0.000456247  | 724          |     |
| age.yrs        | >= | 53.33333333 | TBILI.resultn | =  | Missing     |                | Missing | 0.00152719   | 724          |     |
| age.yrs        | >= | 53.33333333 | TBILI.resultn | <  | 1.55        | Sodium.resultn | =       | Missing      | 0            | 724 |
| age.yrs        | >= | 53.33333333 | TBILI.resultn | <  | 1.55        | Sodium.resultn | <       | 138.5        | 0.005681429  | 724 |
| age.yrs        | >= | 53.33333333 | TBILI.resultn | <  | 1.55        | Sodium.resultn | >=      | 138.5        | 0.000438275  | 724 |
| age.yrs        | >= | 53.33333333 | TBILI.resultn | >= | 1.55        |                | Missing | 0.002920209  | 724          |     |
| psc.yrs.dur    | =  | Missing     |               |    |             |                |         | 0.000879277  | 725          |     |
| psc.yrs.dur    | <  | 6.410677618 | AST.resultn   | =  | Missing     |                |         | 0.000583558  | 725          |     |
| psc.yrs.dur    | <  | 6.410677618 | AST.resultn   | <  | 141.5       |                |         | 0.000663414  | 725          |     |
| psc.yrs.dur    | <  | 6.410677618 | AST.resultn   | >= | 141.5       |                |         | 0            | 725          |     |
| psc.yrs.dur    | >= | 6.410677618 | AST.resultn   | =  | Missing     |                |         | 0.002792752  | 725          |     |
| psc.yrs.dur    | >= | 6.410677618 | AST.resultn   | <  | 42.5        |                |         | -0.000155774 | 725          |     |
| psc.yrs.dur    | >= | 6.410677618 | AST.resultn   | >= | 42.5        |                |         | 0.005086051  | 725          |     |
| AST.resultn    | =  | Missing     |               |    |             |                | Missing | -0.000121971 | 726          |     |
| AST.resultn    | <  | 54.5        |               |    |             |                | Missing | -0.000913346 | 726          |     |
| AST.resultn    | >= | 54.5        | AST.resultn   | =  | Missing     |                | Missing | 0.000589652  | 726          |     |
| AST.resultn    | >= | 54.5        | AST.resultn   | <  | 60.5        |                | Missing | 0.006564974  | 726          |     |
| AST.resultn    | >= | 54.5        | AST.resultn   | >= | 60.5        | ALB.resultn    | =       | Missing      | 8.75E-05     | 726 |
| AST.resultn    | >= | 54.5        | AST.resultn   | >= | 60.5        | ALB.resultn    | <       | 3.155        | 0.000989019  | 726 |
| AST.resultn    | >= | 54.5        | AST.resultn   | >= | 60.5        | ALB.resultn    | >=      | 3.155        | 0            | 726 |
| Sodium.resultn | =  | Missing     |               |    |             |                | Missing | -0.003769698 | 727          |     |

|                |    |             |               |    |             |               |              |         |              |     |
|----------------|----|-------------|---------------|----|-------------|---------------|--------------|---------|--------------|-----|
| Sodium.resultn | <  | 136.5       |               |    |             | Missing       | -0.000624849 | 727     |              |     |
| Sodium.resultn | >= | 136.5       | ALK.times.uln | =  | Missing     | AST.resultn   | =            | Missing | -0.002628515 | 727 |
| Sodium.resultn | >= | 136.5       | ALK.times.uln | =  | Missing     | AST.resultn   | <            | 65      | -0.003942772 | 727 |
| Sodium.resultn | >= | 136.5       | ALK.times.uln | =  | Missing     | AST.resultn   | >=           | 65      | 0            | 727 |
| Sodium.resultn | >= | 136.5       | ALK.times.uln | <  | 5.727171315 |               |              | Missing | -0.003638235 | 727 |
| Sodium.resultn | >= | 136.5       | ALK.times.uln | >= | 5.727171315 |               |              | Missing | -0.001285536 | 727 |
| ALB.resultn    | =  | Missing     |               |    |             |               |              | Missing | -0.002977856 | 728 |
| ALB.resultn    | <  | 2.95        |               |    |             |               |              | Missing | -0.000164092 | 728 |
| ALB.resultn    | >= | 2.95        | PLT.resultn   | =  | Missing     |               |              | Missing | -0.001969417 | 728 |
| ALB.resultn    | >= | 2.95        | PLT.resultn   | <  | 197.5       | TBILI.resultn | =            | Missing | -0.001127545 | 728 |
| ALB.resultn    | >= | 2.95        | PLT.resultn   | <  | 197.5       | TBILI.resultn | <            | 1.05    | -0.001790807 | 728 |
| ALB.resultn    | >= | 2.95        | PLT.resultn   | <  | 197.5       | TBILI.resultn | >=           | 1.05    | 0            | 728 |
| ALB.resultn    | >= | 2.95        | PLT.resultn   | >= | 197.5       |               |              | Missing | -0.00246328  | 728 |
| ALK.times.uln  | =  | Missing     | ALB.resultn   | =  | Missing     |               |              |         | -0.001613709 | 729 |
| ALK.times.uln  | =  | Missing     | ALB.resultn   | <  | 3.95        |               |              |         | 0.000591489  | 729 |
| ALK.times.uln  | =  | Missing     | ALB.resultn   | >= | 3.95        |               |              |         | -0.001598569 | 729 |
| ALK.times.uln  | <  | 5.462893197 | age.yrs       | =  | Missing     |               |              |         | -0.001020679 | 729 |
| ALK.times.uln  | <  | 5.462893197 | age.yrs       | <  | 51.58521561 |               |              |         | -0.001487024 | 729 |
| ALK.times.uln  | <  | 5.462893197 | age.yrs       | >= | 51.58521561 |               |              |         | 0            | 729 |
| ALK.times.uln  | >= | 5.462893197 |               |    |             |               |              |         | 0.00070372   | 729 |
| ALB.resultn    | =  | Missing     |               |    |             |               |              | Missing | -0.001811791 | 730 |
| ALB.resultn    | <  | 2.95        |               |    |             |               |              | Missing | 0.001823463  | 730 |
| ALB.resultn    | >= | 2.95        | ALK.times.uln | =  | Missing     | TBILI.resultn | =            | Missing | -0.001181366 | 730 |
| ALB.resultn    | >= | 2.95        | ALK.times.uln | =  | Missing     | TBILI.resultn | <            | 0.95    | -0.00184154  | 730 |
| ALB.resultn    | >= | 2.95        | ALK.times.uln | =  | Missing     | TBILI.resultn | >=           | 0.95    | 0            | 730 |
| ALB.resultn    | >= | 2.95        | ALK.times.uln | <  | 5.391217738 |               |              | Missing | -0.001518327 | 730 |
| ALB.resultn    | >= | 2.95        | ALK.times.uln | >= | 5.391217738 |               |              | Missing | 0.000210759  | 730 |
| PLT.resultn    | =  | Missing     |               |    |             |               |              | Missing | -0.002223199 | 731 |
| PLT.resultn    | <  | 249.5       | ALK.times.uln | =  | Missing     | TBILI.resultn | =            | Missing | -0.001213504 | 731 |
| PLT.resultn    | <  | 249.5       | ALK.times.uln | =  | Missing     | TBILI.resultn | <            | 0.75    | -0.002831508 | 731 |
| PLT.resultn    | <  | 249.5       | ALK.times.uln | =  | Missing     | TBILI.resultn | >=           | 0.75    | 0            | 731 |
| PLT.resultn    | <  | 249.5       | ALK.times.uln | <  | 4.399930889 |               |              | Missing | -0.001758284 | 731 |
| PLT.resultn    | <  | 249.5       | ALK.times.uln | >= | 4.399930889 |               |              | Missing | 0.001166306  | 731 |
| PLT.resultn    | >= | 249.5       |               |    |             |               |              | Missing | -0.002536614 | 731 |
| PLT.resultn    | =  | Missing     |               |    |             |               |              | Missing | -0.001483126 | 732 |
| PLT.resultn    | <  | 249         | ALB.resultn   | =  | Missing     |               |              | Missing | -0.000520027 | 732 |
| PLT.resultn    | <  | 249         | ALB.resultn   | <  | 3.75        | PLT.resultn   | =            | Missing | 0.00094755   | 732 |
| PLT.resultn    | <  | 249         | ALB.resultn   | <  | 3.75        | PLT.resultn   | <            | 210.5   | 0.002179365  | 732 |
| PLT.resultn    | <  | 249         | ALB.resultn   | <  | 3.75        | PLT.resultn   | >=           | 210.5   | 0            | 732 |
| PLT.resultn    | <  | 249         | ALB.resultn   | >= | 3.75        |               |              | Missing | -0.001039324 | 732 |
| PLT.resultn    | >= | 249         |               |    |             |               |              | Missing | -0.001914429 | 732 |
| TBILI.resultn  | =  | Missing     |               |    |             |               |              |         | 0.001209826  | 733 |
| TBILI.resultn  | <  | 2.45        | PLT.resultn   | =  | Missing     |               |              |         | 0            | 733 |
| TBILI.resultn  | <  | 2.45        | PLT.resultn   | <  | 267.5       |               |              |         | 0.000601651  | 733 |
| TBILI.resultn  | <  | 2.45        | PLT.resultn   | >= | 267.5       |               |              |         | -0.000620806 | 733 |
| TBILI.resultn  | >= | 2.45        | psc.yrs.dur   | =  | Missing     |               |              |         | 0.001140092  | 733 |
| TBILI.resultn  | >= | 2.45        | psc.yrs.dur   | <  | 1.923340178 |               |              |         | 0.000109133  | 733 |
| TBILI.resultn  | >= | 2.45        | psc.yrs.dur   | >= | 1.923340178 |               |              |         | 0.002358498  | 733 |
| psc.yrs.dur    | =  | Missing     |               |    |             |               |              |         | 2.99E-05     | 734 |
| psc.yrs.dur    | <  | 6.444900753 | ALB.resultn   | =  | Missing     |               |              |         | 0            | 734 |
| psc.yrs.dur    | <  | 6.444900753 | ALB.resultn   | <  | 3.135       |               |              |         | 0.000697101  | 734 |
| psc.yrs.dur    | <  | 6.444900753 | ALB.resultn   | >= | 3.135       |               |              |         | -0.000332488 | 734 |
| psc.yrs.dur    | >= | 6.444900753 | AST.resultn   | =  | Missing     |               |              |         | 0.0017258    | 734 |
| psc.yrs.dur    | >= | 6.444900753 | AST.resultn   | <  | 43          |               |              |         | -0.000742707 | 734 |
| psc.yrs.dur    | >= | 6.444900753 | AST.resultn   | >= | 43          |               |              |         | 0.003920028  | 734 |
| PLT.resultn    | =  | Missing     |               |    |             |               |              |         | -0.000502321 | 735 |
| PLT.resultn    | <  | 185.5       | TBILI.resultn | =  | Missing     |               |              |         | 0.001777936  | 735 |
| PLT.resultn    | <  | 185.5       | TBILI.resultn | <  | 1.15        |               |              |         | 0.00087062   | 735 |
| PLT.resultn    | <  | 185.5       | TBILI.resultn | >= | 1.15        |               |              |         | 0.002685252  | 735 |
| PLT.resultn    | >= | 185.5       | TBILI.resultn | =  | Missing     |               |              |         | -0.00085889  | 735 |
| PLT.resultn    | >= | 185.5       | TBILI.resultn | <  | 1.55        |               |              |         | -0.001014595 | 735 |
| PLT.resultn    | >= | 185.5       | TBILI.resultn | >= | 1.55        |               |              |         | 0            | 735 |

|               |    |                           |    |                           |         |             |              |     |
|---------------|----|---------------------------|----|---------------------------|---------|-------------|--------------|-----|
| ALB.resultn   | =  | Missing                   |    |                           | Missing | 0.000779821 | 736          |     |
| ALB.resultn   | <  | 2.965                     |    |                           | Missing | 0.002245959 | 736          |     |
| ALB.resultn   | >= | 2.965 psc.yrs.dur         | =  | Missing                   | Missing | 0.000351821 | 736          |     |
| ALB.resultn   | >= | 2.965 psc.yrs.dur         | <  | 14.50376454 TBILL.resultn | =       | Missing     | 0.000148337  | 736 |
| ALB.resultn   | >= | 2.965 psc.yrs.dur         | <  | 14.50376454 TBILL.resultn | <       | 2.65        | 0.000158987  | 736 |
| ALB.resultn   | >= | 2.965 psc.yrs.dur         | <  | 14.50376454 TBILL.resultn | >=      | 2.65        | 0            | 736 |
| ALB.resultn   | >= | 2.965 psc.yrs.dur         | >= | 14.50376454               | Missing |             | 0.004665679  | 736 |
| ALK.times.uln | =  | Missing psc.yrs.dur       | =  | Missing                   | Missing |             | 0.000579572  | 737 |
| ALK.times.uln | =  | Missing psc.yrs.dur       | <  | 0.459958932               | Missing |             | -0.000627592 | 737 |
| ALK.times.uln | =  | Missing psc.yrs.dur       | >= | 0.459958932 ALB.resultn   | =       | Missing     | 0.001786736  | 737 |
| ALK.times.uln | =  | Missing psc.yrs.dur       | >= | 0.459958932 ALB.resultn   | <       | 3.95        | 0.004317946  | 737 |
| ALK.times.uln | =  | Missing psc.yrs.dur       | >= | 0.459958932 ALB.resultn   | >=      | 3.95        | 0            | 737 |
| ALK.times.uln | <  | 6.02                      |    |                           | Missing |             | -0.000206425 | 737 |
| ALK.times.uln | >= | 6.02                      |    |                           | Missing |             | 0.001048856  | 737 |
| TBILL.resultn | =  | Missing                   |    |                           |         |             | -0.000564512 | 738 |
| TBILL.resultn | <  | 2.05 age.yrs              | =  | Missing                   |         |             | -0.000993643 | 738 |
| TBILL.resultn | <  | 2.05 age.yrs              | <  | 49.22655715               |         |             | -0.001500887 | 738 |
| TBILL.resultn | <  | 2.05 age.yrs              | >= | 49.22655715               |         |             | 0            | 738 |
| TBILL.resultn | >= | 2.05 Hemoglobin.resultn   | =  | Missing                   |         |             | 0.000217414  | 738 |
| TBILL.resultn | >= | 2.05 Hemoglobin.resultn   | <  | 12.9                      |         |             | 0.001305908  | 738 |
| TBILL.resultn | >= | 2.05 Hemoglobin.resultn   | >= | 12.9                      |         |             | -0.000772126 | 738 |
| ALK.times.uln | =  | Missing ALB.resultn       | =  | Missing                   | Missing |             | -0.004423302 | 739 |
| ALK.times.uln | =  | Missing ALB.resultn       | <  | 3.95 TBILL.resultn        | =       | Missing     | -0.001616874 | 739 |
| ALK.times.uln | =  | Missing ALB.resultn       | <  | 3.95 TBILL.resultn        | <       | 0.95        | -0.003233747 | 739 |
| ALK.times.uln | =  | Missing ALB.resultn       | <  | 3.95 TBILL.resultn        | >=      | 0.95        | 0            | 739 |
| ALK.times.uln | =  | Missing ALB.resultn       | >= | 3.95                      | Missing |             | -0.004421114 | 739 |
| ALK.times.uln | <  | 5.462893197               |    |                           | Missing |             | -0.003911751 | 739 |
| ALK.times.uln | >= | 5.462893197               |    |                           | Missing |             | -0.002150844 | 739 |
| ALK.times.uln | =  | Missing TBILL.resultn     | =  | Missing                   |         |             | 0.000108053  | 740 |
| ALK.times.uln | =  | Missing TBILL.resultn     | <  | 1.15                      |         |             | 2.67E-05     | 740 |
| ALK.times.uln | =  | Missing TBILL.resultn     | >= | 1.15                      |         |             | 0.004928878  | 740 |
| ALK.times.uln | <  | 5.92438247 PLT.resultn    | =  | Missing                   |         |             | 0            | 740 |
| ALK.times.uln | <  | 5.92438247 PLT.resultn    | <  | 209.5                     |         |             | 0.00228346   | 740 |
| ALK.times.uln | <  | 5.92438247 PLT.resultn    | >= | 209.5                     |         |             | 0.000308585  | 740 |
| ALK.times.uln | >= | 5.92438247                |    |                           |         |             | 0.002358437  | 740 |
| age.yrs       | =  | Missing                   |    |                           |         |             | 0.000153898  | 741 |
| age.yrs       | <  | 62.51608487 ALK.times.uln | =  | Missing                   |         |             | 0            | 741 |
| age.yrs       | <  | 62.51608487 ALK.times.uln | <  | 6.02                      |         |             | -0.000264894 | 741 |
| age.yrs       | <  | 62.51608487 ALK.times.uln | >= | 6.02                      |         |             | 0.001211681  | 741 |
| age.yrs       | >= | 62.51608487 AST.resultn   | =  | Missing                   |         |             | 0.002482652  | 741 |
| age.yrs       | >= | 62.51608487 AST.resultn   | <  | 51                        |         |             | -0.00071056  | 741 |
| age.yrs       | >= | 62.51608487 AST.resultn   | >= | 51                        |         |             | 0.004763518  | 741 |
| TBILL.resultn | =  | Missing                   |    |                           |         |             | -7.45E-06    | 742 |
| TBILL.resultn | <  | 1.65 ALK.times.uln        | =  | Missing                   |         |             | 0            | 742 |
| TBILL.resultn | <  | 1.65 ALK.times.uln        | <  | 3.635579421               |         |             | -0.000737739 | 742 |
| TBILL.resultn | <  | 1.65 ALK.times.uln        | >= | 3.635579421               |         |             | 0.001198089  | 742 |
| TBILL.resultn | >= | 1.65 Hemoglobin.resultn   | =  | Missing                   |         |             | 0.003622229  | 742 |
| TBILL.resultn | >= | 1.65 Hemoglobin.resultn   | <  | 12.75                     |         |             | 0.000726189  | 742 |
| TBILL.resultn | >= | 1.65 Hemoglobin.resultn   | >= | 12.75                     |         |             | -0.000884673 | 742 |
| age.yrs       | =  | Missing                   |    |                           | Missing |             | -0.003921131 | 743 |
| age.yrs       | <  | 51.92060233               |    |                           | Missing |             | -0.004292749 | 743 |
| age.yrs       | >= | 51.92060233 AST.resultn   | =  | Missing                   | Missing |             | -0.003232176 | 743 |
| age.yrs       | >= | 51.92060233 AST.resultn   | <  | 54.5                      | Missing |             | -0.004615731 | 743 |
| age.yrs       | >= | 51.92060233 AST.resultn   | >= | 54.5 psc.yrs.dur          | =       | Missing     | -0.001606499 | 743 |
| age.yrs       | >= | 51.92060233 AST.resultn   | >= | 54.5 psc.yrs.dur          | <       | 0.741957563 | -0.003382103 | 743 |
| age.yrs       | >= | 51.92060233 AST.resultn   | >= | 54.5 psc.yrs.dur          | >=      | 0.741957563 | 0            | 743 |
| ALB.resultn   | =  | Missing                   |    |                           |         |             | -0.000206958 | 744 |
| ALB.resultn   | <  | 3.31 Hemoglobin.resultn   | =  | Missing                   |         |             | 0.001953365  | 744 |
| ALB.resultn   | <  | 3.31 Hemoglobin.resultn   | <  | 11.85                     |         |             | 0.003251347  | 744 |
| ALB.resultn   | <  | 3.31 Hemoglobin.resultn   | >= | 11.85                     |         |             | 0.001088044  | 744 |
| ALB.resultn   | >= | 3.31 Sodium.resultn       | =  | Missing                   |         |             | 0            | 744 |
| ALB.resultn   | >= | 3.31 Sodium.resultn       | <  | 137.5                     |         |             | 0.002709915  | 744 |

|               |    |             |                    |    |             |                    |         |              |              |     |
|---------------|----|-------------|--------------------|----|-------------|--------------------|---------|--------------|--------------|-----|
| ALB.resultn   | >= | 3.31        | Sodium.resultn     | >= | 137.5       |                    |         | 0.000385243  | 744          |     |
| TBILL.resultn | =  | Missing     |                    |    |             |                    |         | -0.002182161 | 745          |     |
| TBILL.resultn | <  | 2.05        | age.yrs            | =  | Missing     |                    |         | -0.003014597 | 745          |     |
| TBILL.resultn | <  | 2.05        | age.yrs            | <  | 67.11156742 |                    |         | -0.003177149 | 745          |     |
| TBILL.resultn | <  | 2.05        | age.yrs            | >= | 67.11156742 |                    |         | 0            | 745          |     |
| TBILL.resultn | >= | 2.05        | PLT.resultn        | =  | Missing     |                    |         | -0.001474309 | 745          |     |
| TBILL.resultn | >= | 2.05        | PLT.resultn        | <  | 264.5       |                    |         | -0.000444815 | 745          |     |
| TBILL.resultn | >= | 2.05        | PLT.resultn        | >= | 264.5       |                    |         | -0.002503804 | 745          |     |
| TBILL.resultn | =  | Missing     |                    |    |             |                    |         | -0.000709457 | 746          |     |
| TBILL.resultn | <  | 2.65        | age.yrs            | =  | Missing     |                    |         | -0.000792872 | 746          |     |
| TBILL.resultn | <  | 2.65        | age.yrs            | <  | 49.41957563 |                    |         | -0.001241018 | 746          |     |
| TBILL.resultn | <  | 2.65        | age.yrs            | >= | 49.41957563 |                    |         | 0            | 746          |     |
| TBILL.resultn | >= | 2.65        | psc.yrs.dur        | =  | Missing     |                    |         | 0.000885315  | 746          |     |
| TBILL.resultn | >= | 2.65        | psc.yrs.dur        | <  | 2.6954141   |                    |         | -0.001422543 | 746          |     |
| TBILL.resultn | >= | 2.65        | psc.yrs.dur        | >= | 2.6954141   |                    |         | 0.003193174  | 746          |     |
| ALB.resultn   | =  | Missing     |                    |    |             |                    | Missing | -0.003232807 | 747          |     |
| ALB.resultn   | <  | 3.13        |                    |    |             |                    | Missing | -0.001468222 | 747          |     |
| ALB.resultn   | >= | 3.13        | PLT.resultn        | =  | Missing     |                    | Missing | -0.003244829 | 747          |     |
| ALB.resultn   | >= | 3.13        | PLT.resultn        | <  | 209.5       | PLT.resultn        | =       | Missing      | -0.002349036 | 747 |
| ALB.resultn   | >= | 3.13        | PLT.resultn        | <  | 209.5       | PLT.resultn        | <       | 196.5        | -0.00391506  | 747 |
| ALB.resultn   | >= | 3.13        | PLT.resultn        | <  | 209.5       | PLT.resultn        | >=      | 196.5        | 0            | 747 |
| ALB.resultn   | >= | 3.13        | PLT.resultn        | >= | 209.5       |                    |         | Missing      | -0.003803223 | 747 |
| ALB.resultn   | =  | Missing     |                    |    |             |                    |         | Missing      | -0.00251733  | 748 |
| ALB.resultn   | <  | 3.15        |                    |    |             |                    |         | Missing      | -0.000236382 | 748 |
| ALB.resultn   | >= | 3.15        | TBILL.resultn      | =  | Missing     |                    |         | Missing      | -0.001876094 | 748 |
| ALB.resultn   | >= | 3.15        | TBILL.resultn      | <  | 0.75        |                    |         | Missing      | -0.002526399 | 748 |
| ALB.resultn   | >= | 3.15        | TBILL.resultn      | >= | 0.75        | Hemoglobin.resultn | =       | Missing      | 0            | 748 |
| ALB.resultn   | >= | 3.15        | TBILL.resultn      | >= | 0.75        | Hemoglobin.resultn | <       | 14.15        | -0.000830089 | 748 |
| ALB.resultn   | >= | 3.15        | TBILL.resultn      | >= | 0.75        | Hemoglobin.resultn | >=      | 14.15        | -0.002536241 | 748 |
| TBILL.resultn | =  | Missing     |                    |    |             |                    |         |              | -0.000228832 | 749 |
| TBILL.resultn | <  | 1.95        | psc.yrs.dur        | =  | Missing     |                    |         |              | -0.001082426 | 749 |
| TBILL.resultn | <  | 1.95        | psc.yrs.dur        | <  | 2.138261465 |                    |         |              | -0.00156189  | 749 |
| TBILL.resultn | <  | 1.95        | psc.yrs.dur        | >= | 2.138261465 |                    |         |              | 0            | 749 |
| TBILL.resultn | >= | 1.95        | PLT.resultn        | =  | Missing     |                    |         |              | 0.001281388  | 749 |
| TBILL.resultn | >= | 1.95        | PLT.resultn        | <  | 224         |                    |         |              | 0.002682608  | 749 |
| TBILL.resultn | >= | 1.95        | PLT.resultn        | >= | 224         |                    |         |              | 7.55E-06     | 749 |
| psc.yrs.dur   | =  | Missing     |                    |    |             |                    |         | Missing      | -0.004526221 | 750 |
| psc.yrs.dur   | <  | 6.379192334 |                    |    |             |                    |         | Missing      | -0.004960695 | 750 |
| psc.yrs.dur   | >= | 6.379192334 | TBILL.resultn      | =  | Missing     |                    |         | Missing      | -0.002452594 | 750 |
| psc.yrs.dur   | >= | 6.379192334 | TBILL.resultn      | <  | 1.5         | PLT.resultn        | =       | Missing      | -0.003159725 | 750 |
| psc.yrs.dur   | >= | 6.379192334 | TBILL.resultn      | <  | 1.5         | PLT.resultn        | <       | 244          | -0.005529519 | 750 |
| psc.yrs.dur   | >= | 6.379192334 | TBILL.resultn      | <  | 1.5         | PLT.resultn        | >=      | 244          | 0            | 750 |
| psc.yrs.dur   | >= | 6.379192334 | TBILL.resultn      | >= | 1.5         |                    |         | Missing      | -0.000260487 | 750 |
| ALB.resultn   | =  | Missing     |                    |    |             |                    |         | Missing      | -0.0018795   | 751 |
| ALB.resultn   | <  | 3.105       |                    |    |             |                    |         | Missing      | 0.000843072  | 751 |
| ALB.resultn   | >= | 3.105       | PLT.resultn        | =  | Missing     |                    |         | Missing      | -0.001904004 | 751 |
| ALB.resultn   | >= | 3.105       | PLT.resultn        | <  | 185.5       |                    |         | Missing      | 0.001202316  | 751 |
| ALB.resultn   | >= | 3.105       | PLT.resultn        | >= | 185.5       | age.yrs            | =       | Missing      | -0.001389899 | 751 |
| ALB.resultn   | >= | 3.105       | PLT.resultn        | >= | 185.5       | age.yrs            | <       | 53.64681725  | -0.001901381 | 751 |
| ALB.resultn   | >= | 3.105       | PLT.resultn        | >= | 185.5       | age.yrs            | >=      | 53.64681725  | 0            | 751 |
| age.yrs       | =  | Missing     |                    |    |             |                    |         | Missing      | -0.005373147 | 752 |
| age.yrs       | <  | 55.77138946 |                    |    |             |                    |         | Missing      | -0.005668024 | 752 |
| age.yrs       | >= | 55.77138946 | AST.resultn        | =  | Missing     |                    |         | Missing      | -0.004440178 | 752 |
| age.yrs       | >= | 55.77138946 | AST.resultn        | <  | 51.5        |                    |         | Missing      | -0.006210574 | 752 |
| age.yrs       | >= | 55.77138946 | AST.resultn        | >= | 51.5        | psc.yrs.dur        | =       | Missing      | -0.002276359 | 752 |
| age.yrs       | >= | 55.77138946 | AST.resultn        | >= | 51.5        | psc.yrs.dur        | <       | 0.733744011  | -0.004727823 | 752 |
| age.yrs       | >= | 55.77138946 | AST.resultn        | >= | 51.5        | psc.yrs.dur        | >=      | 0.733744011  | 0            | 752 |
| TBILL.resultn | =  | Missing     |                    |    |             |                    |         |              | -0.003160278 | 753 |
| TBILL.resultn | <  | 2.05        | age.yrs            | =  | Missing     |                    |         |              | -0.002457065 | 753 |
| TBILL.resultn | <  | 2.05        | age.yrs            | <  | 63.52635181 |                    |         |              | -0.002790905 | 753 |
| TBILL.resultn | <  | 2.05        | age.yrs            | >= | 63.52635181 |                    |         |              | 0            | 753 |
| TBILL.resultn | >= | 2.05        | Hemoglobin.resultn | =  | Missing     |                    |         |              | -0.001540837 | 753 |

|                    |    |             |                    |    |             |             |         |              |              |     |
|--------------------|----|-------------|--------------------|----|-------------|-------------|---------|--------------|--------------|-----|
| TBILL.resultn      | >= | 2.05        | Hemoglobin.resultn | <  | 12.9        |             |         | -0.000759592 | 753          |     |
| TBILL.resultn      | >= | 2.05        | Hemoglobin.resultn | >= | 12.9        |             |         | -0.002256978 | 753          |     |
| Sodium.resultn     | =  | Missing     |                    |    |             | Missing     |         | -0.000787485 | 754          |     |
| Sodium.resultn     | <  | 136.5       |                    |    |             | Missing     |         | 0.002212411  | 754          |     |
| Sodium.resultn     | >= | 136.5       | AST.resultn        | =  | Missing     | Missing     |         | 0.000460091  | 754          |     |
| Sodium.resultn     | >= | 136.5       | AST.resultn        | <  | 100.5       | Missing     |         | -0.00013545  | 754          |     |
| Sodium.resultn     | >= | 136.5       | AST.resultn        | >= | 100.5       | PLT.resultn | =       | Missing      | 0.002477245  | 754 |
| Sodium.resultn     | >= | 136.5       | AST.resultn        | >= | 100.5       | PLT.resultn | <       | 272          | 0.004799662  | 754 |
| Sodium.resultn     | >= | 136.5       | AST.resultn        | >= | 100.5       | PLT.resultn | >=      | 272          | 0            | 754 |
| ALK.times.uln      | =  | Missing     | age.yrs            | =  | Missing     |             | Missing |              | -0.002146108 | 755 |
| ALK.times.uln      | =  | Missing     | age.yrs            | <  | 51.56605065 |             | Missing |              | -0.002528942 | 755 |
| ALK.times.uln      | =  | Missing     | age.yrs            | >= | 51.56605065 | AST.resultn | =       | Missing      | -0.001460198 | 755 |
| ALK.times.uln      | =  | Missing     | age.yrs            | >= | 51.56605065 | AST.resultn | <       | 57           | -0.002503196 | 755 |
| ALK.times.uln      | =  | Missing     | age.yrs            | >= | 51.56605065 | AST.resultn | >=      | 57           | 0            | 755 |
| ALK.times.uln      | <  | 5.857962963 |                    |    |             |             | Missing |              | -0.001982796 | 755 |
| ALK.times.uln      | >= | 5.857962963 |                    |    |             |             | Missing |              | 0.000787282  | 755 |
| Hemoglobin.resultn | =  | Missing     | TBILL.resultn      | =  | Missing     |             |         |              | 0.001297988  | 756 |
| Hemoglobin.resultn | =  | Missing     | TBILL.resultn      | <  | 1.1         |             |         |              | 0.000104559  | 756 |
| Hemoglobin.resultn | =  | Missing     | TBILL.resultn      | >= | 1.1         |             |         |              | 0.003983203  | 756 |
| Hemoglobin.resultn | <  | 14.15       | PLT.resultn        | =  | Missing     |             |         |              | 0.000524455  | 756 |
| Hemoglobin.resultn | <  | 14.15       | PLT.resultn        | <  | 249.5       |             |         |              | 0.001573365  | 756 |
| Hemoglobin.resultn | <  | 14.15       | PLT.resultn        | >= | 249.5       |             |         |              | 0            | 756 |
| Hemoglobin.resultn | >= | 14.15       |                    |    |             |             |         |              | -0.000192188 | 756 |
| ALK.times.uln      | =  | Missing     | TBILL.resultn      | =  | Missing     |             |         |              | 0            | 757 |
| ALK.times.uln      | =  | Missing     | TBILL.resultn      | <  | 1.25        |             |         |              | -1.42E-05    | 757 |
| ALK.times.uln      | =  | Missing     | TBILL.resultn      | >= | 1.25        |             |         |              | 0.002373866  | 757 |
| ALK.times.uln      | <  | 2.905037968 |                    |    |             |             |         |              | 0.000145518  | 757 |
| ALK.times.uln      | >= | 2.905037968 | age.yrs            | =  | Missing     |             |         |              | 0.001819686  | 757 |
| ALK.times.uln      | >= | 2.905037968 | age.yrs            | <  | 48.85968515 |             |         |              | 0.001078037  | 757 |
| ALK.times.uln      | >= | 2.905037968 | age.yrs            | >= | 48.85968515 |             |         |              | 0.003521117  | 757 |
| ALK.times.uln      | =  | Missing     | TBILL.resultn      | =  | Missing     |             |         |              | -0.001667401 | 758 |
| ALK.times.uln      | =  | Missing     | TBILL.resultn      | <  | 1.15        |             |         |              | -0.000863953 | 758 |
| ALK.times.uln      | =  | Missing     | TBILL.resultn      | >= | 1.15        |             |         |              | 0.002609723  | 758 |
| ALK.times.uln      | <  | 5.462893197 | TBILL.resultn      | =  | Missing     |             |         |              | -0.001314353 | 758 |
| ALK.times.uln      | <  | 5.462893197 | TBILL.resultn      | <  | 2.75        |             |         |              | -0.001415457 | 758 |
| ALK.times.uln      | <  | 5.462893197 | TBILL.resultn      | >= | 2.75        |             |         |              | 0            | 758 |
| ALK.times.uln      | >= | 5.462893197 |                    |    |             |             |         |              | 0.000851347  | 758 |
| TBILL.resultn      | =  | Missing     |                    |    |             |             |         |              | 0.002709365  | 759 |
| TBILL.resultn      | <  | 1.65        | Sodium.resultn     | =  | Missing     |             |         |              | 0            | 759 |
| TBILL.resultn      | <  | 1.65        | Sodium.resultn     | <  | 137.5       |             |         |              | 0.002590108  | 759 |
| TBILL.resultn      | <  | 1.65        | Sodium.resultn     | >= | 137.5       |             |         |              | 0.000613653  | 759 |
| TBILL.resultn      | >= | 1.65        | Hemoglobin.resultn | =  | Missing     |             |         |              | 0.000931842  | 759 |
| TBILL.resultn      | >= | 1.65        | Hemoglobin.resultn | <  | 13.1        |             |         |              | 0.001936665  | 759 |
| TBILL.resultn      | >= | 1.65        | Hemoglobin.resultn | >= | 13.1        |             |         |              | -5.99E-06    | 759 |
| TBILL.resultn      | =  | Missing     |                    |    |             |             |         |              | -4.91E-05    | 760 |
| TBILL.resultn      | <  | 2.85        | ALB.resultn        | =  | Missing     |             |         |              | 0            | 760 |
| TBILL.resultn      | <  | 2.85        | ALB.resultn        | <  | 3.915       |             |         |              | 0.001299375  | 760 |
| TBILL.resultn      | <  | 2.85        | ALB.resultn        | >= | 3.915       |             |         |              | -3.79E-05    | 760 |
| TBILL.resultn      | >= | 2.85        | psc.yrs.dur        | =  | Missing     |             |         |              | 0.002379518  | 760 |
| TBILL.resultn      | >= | 2.85        | psc.yrs.dur        | <  | 1.778234086 |             |         |              | 0.000963004  | 760 |
| TBILL.resultn      | >= | 2.85        | psc.yrs.dur        | >= | 1.778234086 |             |         |              | 0.003796033  | 760 |
| ALB.resultn        | =  | Missing     |                    |    |             |             |         |              | -0.000967583 | 761 |
| ALB.resultn        | <  | 3.33        | TBILL.resultn      | =  | Missing     |             |         |              | -4.48E-05    | 761 |
| ALB.resultn        | <  | 3.33        | TBILL.resultn      | <  | 1.31        |             |         |              | -0.001422408 | 761 |
| ALB.resultn        | <  | 3.33        | TBILL.resultn      | >= | 1.31        |             |         |              | 0.001447542  | 761 |
| ALB.resultn        | >= | 3.33        | TBILL.resultn      | =  | Missing     |             |         |              | -0.0009061   | 761 |
| ALB.resultn        | >= | 3.33        | TBILL.resultn      | <  | 1.05        |             |         |              | -0.001302099 | 761 |
| ALB.resultn        | >= | 3.33        | TBILL.resultn      | >= | 1.05        |             |         |              | 0            | 761 |
| ALB.resultn        | =  | Missing     |                    |    |             |             | Missing |              | -0.000397449 | 762 |
| ALB.resultn        | <  | 2.915       |                    |    |             |             | Missing |              | 0.002134942  | 762 |
| ALB.resultn        | >= | 2.915       | TBILL.resultn      | =  | Missing     |             | Missing |              | -0.000324488 | 762 |
| ALB.resultn        | >= | 2.915       | TBILL.resultn      | <  | 0.85        |             | Missing |              | -0.000972276 | 762 |

|               |    |             |               |    |             |                |    |             |              |   |     |
|---------------|----|-------------|---------------|----|-------------|----------------|----|-------------|--------------|---|-----|
| ALB.resultn   | >= | 2.915       | TBILL.resultn | >= | 0.85        | Sodium.resultn | =  | Missing     |              | 0 | 762 |
| ALB.resultn   | >= | 2.915       | TBILL.resultn | >= | 0.85        | Sodium.resultn | <  | 137.5       | 0.003521724  |   | 762 |
| ALB.resultn   | >= | 2.915       | TBILL.resultn | >= | 0.85        | Sodium.resultn | >= | 137.5       | 0.000279739  |   | 762 |
| AST.resultn   | =  | Missing     |               |    |             |                |    | Missing     | -0.003240255 |   | 763 |
| AST.resultn   | <  | 211.5       | age.yrs       | =  | Missing     |                |    | Missing     | -0.002607348 |   | 763 |
| AST.resultn   | <  | 211.5       | age.yrs       | <  | 51.63175907 |                |    | Missing     | -0.003022437 |   | 763 |
| AST.resultn   | <  | 211.5       | age.yrs       | >= | 51.63175907 | AST.resultn    | =  | Missing     | -0.001714623 |   | 763 |
| AST.resultn   | <  | 211.5       | age.yrs       | >= | 51.63175907 | AST.resultn    | <  | 51.5        | -0.003209423 |   | 763 |
| AST.resultn   | <  | 211.5       | age.yrs       | >= | 51.63175907 | AST.resultn    | >= | 51.5        |              | 0 | 763 |
| AST.resultn   | >= | 211.5       |               |    |             |                |    | Missing     | 0.000307222  |   | 763 |
| age.yrs       | =  | Missing     |               |    |             |                |    | Missing     | -0.004440562 |   | 764 |
| age.yrs       | <  | 53.64681725 |               |    |             |                |    | Missing     | -0.004733848 |   | 764 |
| age.yrs       | >= | 53.64681725 | AST.resultn   | =  | Missing     |                |    | Missing     | -0.003621985 |   | 764 |
| age.yrs       | >= | 53.64681725 | AST.resultn   | <  | 51.5        |                |    | Missing     | -0.005238255 |   | 764 |
| age.yrs       | >= | 53.64681725 | AST.resultn   | >= | 51.5        | psc.yrs.dur    | =  | Missing     | -0.001955207 |   | 764 |
| age.yrs       | >= | 53.64681725 | AST.resultn   | >= | 51.5        | psc.yrs.dur    | <  | 0.741957563 | -0.003475924 |   | 764 |
| age.yrs       | >= | 53.64681725 | AST.resultn   | >= | 51.5        | psc.yrs.dur    | >= | 0.741957563 |              | 0 | 764 |
| psc.yrs.dur   | =  | Missing     |               |    |             |                |    |             | -0.00026631  |   | 765 |
| psc.yrs.dur   | <  | 6.379192334 | PLT.resultn   | =  | Missing     |                |    |             |              | 0 | 765 |
| psc.yrs.dur   | <  | 6.379192334 | PLT.resultn   | <  | 209.5       |                |    |             | 0.000463028  |   | 765 |
| psc.yrs.dur   | <  | 6.379192334 | PLT.resultn   | >= | 209.5       |                |    |             | -0.000997671 |   | 765 |
| psc.yrs.dur   | >= | 6.379192334 | AST.resultn   | =  | Missing     |                |    |             | 0.001867966  |   | 765 |
| psc.yrs.dur   | >= | 6.379192334 | AST.resultn   | <  | 43          |                |    |             | -0.001126053 |   | 765 |
| psc.yrs.dur   | >= | 6.379192334 | AST.resultn   | >= | 43          |                |    |             | 0.004546825  |   | 765 |
| age.yrs       | =  | Missing     |               |    |             |                |    | Missing     | 0.000648861  |   | 766 |
| age.yrs       | <  | 69.3798768  | ALB.resultn   | =  | Missing     |                |    | Missing     | 0.000259371  |   | 766 |
| age.yrs       | <  | 69.3798768  | ALB.resultn   | <  | 2.95        |                |    | Missing     | 0.00214139   |   | 766 |
| age.yrs       | <  | 69.3798768  | ALB.resultn   | >= | 2.95        | TBILL.resultn  | =  | Missing     | 0.00024198   |   | 766 |
| age.yrs       | <  | 69.3798768  | ALB.resultn   | >= | 2.95        | TBILL.resultn  | <  | 2.65        | 0.000261286  |   | 766 |
| age.yrs       | <  | 69.3798768  | ALB.resultn   | >= | 2.95        | TBILL.resultn  | >= | 2.65        |              | 0 | 766 |
| age.yrs       | >= | 69.3798768  |               |    |             |                |    | Missing     | 0.008626931  |   | 766 |
| ALK.times.uln | =  | Missing     | TBILL.resultn | =  | Missing     |                |    | Missing     | -0.00162463  |   | 767 |
| ALK.times.uln | =  | Missing     | TBILL.resultn | <  | 1.31        | TBILL.resultn  | =  | Missing     | -0.001146096 |   | 767 |
| ALK.times.uln | =  | Missing     | TBILL.resultn | <  | 1.31        | TBILL.resultn  | <  | 0.75        | -0.001591801 |   | 767 |
| ALK.times.uln | =  | Missing     | TBILL.resultn | <  | 1.31        | TBILL.resultn  | >= | 0.75        |              | 0 | 767 |
| ALK.times.uln | =  | Missing     | TBILL.resultn | >= | 1.31        |                |    | Missing     | 0.002787583  |   | 767 |
| ALK.times.uln | <  | 5.446215139 |               |    |             |                |    | Missing     | -0.001044263 |   | 767 |
| ALK.times.uln | >= | 5.446215139 |               |    |             |                |    | Missing     | 0.000861194  |   | 767 |
| TBILL.resultn | =  | Missing     |               |    |             |                |    |             | -0.000451703 |   | 768 |
| TBILL.resultn | <  | 2.45        | age.yrs       | =  | Missing     |                |    |             | -0.000985544 |   | 768 |
| TBILL.resultn | <  | 2.45        | age.yrs       | <  | 53.64681725 |                |    |             | -0.001352827 |   | 768 |
| TBILL.resultn | <  | 2.45        | age.yrs       | >= | 53.64681725 |                |    |             |              | 0 | 768 |
| TBILL.resultn | >= | 2.45        | psc.yrs.dur   | =  | Missing     |                |    |             | 0.000907922  |   | 768 |
| TBILL.resultn | >= | 2.45        | psc.yrs.dur   | <  | 2.0862423   |                |    |             | 3.14E-05     |   | 768 |
| TBILL.resultn | >= | 2.45        | psc.yrs.dur   | >= | 2.0862423   |                |    |             | 0.001872148  |   | 768 |
| ALK.times.uln | =  | Missing     | TBILL.resultn | =  | Missing     |                |    |             | 0.000749547  |   | 769 |
| ALK.times.uln | =  | Missing     | TBILL.resultn | <  | 0.95        |                |    |             | -6.78E-07    |   | 769 |
| ALK.times.uln | =  | Missing     | TBILL.resultn | >= | 0.95        |                |    |             | 0.001912396  |   | 769 |
| ALK.times.uln | <  | 5.446215139 |               |    |             |                |    |             | -0.000120767 |   | 769 |
| ALK.times.uln | >= | 5.446215139 | ALK.times.uln | =  | Missing     |                |    |             | 0.00136185   |   | 769 |
| ALK.times.uln | >= | 5.446215139 | ALK.times.uln | <  | 7.069499779 |                |    |             | 0.002859885  |   | 769 |
| ALK.times.uln | >= | 5.446215139 | ALK.times.uln | >= | 7.069499779 |                |    |             |              | 0 | 769 |
| TBILL.resultn | =  | Missing     |               |    |             |                |    |             | -0.000178923 |   | 770 |
| TBILL.resultn | <  | 2.05        | ALK.times.uln | =  | Missing     |                |    |             |              | 0 | 770 |
| TBILL.resultn | <  | 2.05        | ALK.times.uln | <  | 5.963877551 |                |    |             | -0.000569833 |   | 770 |
| TBILL.resultn | <  | 2.05        | ALK.times.uln | >= | 5.963877551 |                |    |             | 0.000909563  |   | 770 |
| TBILL.resultn | >= | 2.05        | PLT.resultn   | =  | Missing     |                |    |             | 0.001011271  |   | 770 |
| TBILL.resultn | >= | 2.05        | PLT.resultn   | <  | 229.5       |                |    |             | 0.002555926  |   | 770 |
| TBILL.resultn | >= | 2.05        | PLT.resultn   | >= | 229.5       |                |    |             | -9.21E-05    |   | 770 |
| TBILL.resultn | =  | Missing     |               |    |             |                |    |             | -0.000789609 |   | 771 |
| TBILL.resultn | <  | 1.9         | psc.yrs.dur   | =  | Missing     |                |    |             | -0.001116683 |   | 771 |
| TBILL.resultn | <  | 1.9         | psc.yrs.dur   | <  | 0.832306639 |                |    |             | -0.001786692 |   | 771 |



|                    |    |                         |             |             |                     |    |             |              |     |
|--------------------|----|-------------------------|-------------|-------------|---------------------|----|-------------|--------------|-----|
| TBILL.resultn      | <  | 1.9 psc.yrs.dur         | >=          | 0.832306639 |                     |    |             | 0            | 771 |
| TBILL.resultn      | >= | 1.9 Hemoglobin.resultn  | =           | Missing     |                     |    |             | -0.000290174 | 771 |
| TBILL.resultn      | >= | 1.9 Hemoglobin.resultn  | <           | 12.9        |                     |    |             | 0.00030827   | 771 |
| TBILL.resultn      | >= | 1.9 Hemoglobin.resultn  | >=          | 12.9        |                     |    |             | -0.000842584 | 771 |
| ALB.resultn        | =  | Missing psc.yrs.dur     | =           | Missing     |                     |    |             | -0.000107834 | 772 |
| ALB.resultn        | =  | Missing psc.yrs.dur     | <           | 0.168377823 |                     |    |             | 0.002684345  | 772 |
| ALB.resultn        | =  | Missing psc.yrs.dur     | >=          | 0.168377823 |                     |    |             | -0.001577402 | 772 |
| ALB.resultn        | <  | 2.95                    |             |             |                     |    |             | 0.001567275  | 772 |
| ALB.resultn        | >= | 2.95 Hemoglobin.resultn | =           | Missing     |                     |    |             | 0            | 772 |
| ALB.resultn        | >= | 2.95 Hemoglobin.resultn | <           | 12.75       |                     |    |             | -0.000635291 | 772 |
| ALB.resultn        | >= | 2.95 Hemoglobin.resultn | >=          | 12.75       |                     |    |             | -0.001597249 | 772 |
| ALB.resultn        | =  | Missing                 |             |             |                     |    | Missing     | 0.000765806  | 773 |
| ALB.resultn        | <  | 3.105                   |             |             |                     |    | Missing     | 0.00212628   | 773 |
| ALB.resultn        | >= | 3.105 ALK.times.uln     | =           | Missing     | PLT.resultn         | =  | Missing     | 0            | 773 |
| ALB.resultn        | >= | 3.105 ALK.times.uln     | =           | Missing     | PLT.resultn         | <  | 206         | 0.003808252  | 773 |
| ALB.resultn        | >= | 3.105 ALK.times.uln     | =           | Missing     | PLT.resultn         | >= | 206         | 3.12E-05     | 773 |
| ALB.resultn        | >= | 3.105 ALK.times.uln     | <           | 5.462893197 |                     |    | Missing     | 0.000391571  | 773 |
| ALB.resultn        | >= | 3.105 ALK.times.uln     | >=          | 5.462893197 |                     |    | Missing     | 0.00177586   | 773 |
| Hemoglobin.resultn | =  | Missing TBILL.resultn   | =           | Missing     |                     |    |             | 0.001538841  | 774 |
| Hemoglobin.resultn | =  | Missing TBILL.resultn   | <           | 1.31        |                     |    |             | 0.000207913  | 774 |
| Hemoglobin.resultn | =  | Missing TBILL.resultn   | >=          | 1.31        |                     |    |             | 0.007661114  | 774 |
| Hemoglobin.resultn | <  | 14.15 TBILL.resultn     | =           | Missing     |                     |    |             | 0.000889537  | 774 |
| Hemoglobin.resultn | <  | 14.15 TBILL.resultn     | <           | 3.15        |                     |    |             | 0.000998017  | 774 |
| Hemoglobin.resultn | <  | 14.15 TBILL.resultn     | >=          | 3.15        |                     |    |             | 0            | 774 |
| Hemoglobin.resultn | >= | 14.15                   |             |             |                     |    |             | -0.000496301 | 774 |
| ALB.resultn        | =  | Missing                 |             |             |                     |    | Missing     | 5.82E-05     | 775 |
| ALB.resultn        | <  | 3.105                   |             |             |                     |    | Missing     | 0.002760754  | 775 |
| ALB.resultn        | >= | 3.105 TBILL.resultn     | =           | Missing     |                     |    | Missing     | 0.000715612  | 775 |
| ALB.resultn        | >= | 3.105 TBILL.resultn     | <           | 0.85        |                     |    | Missing     | 5.88E-08     | 775 |
| ALB.resultn        | >= | 3.105 TBILL.resultn     | >=          | 0.85        | AST.resultn         | =  | Missing     | 0.001623518  | 775 |
| ALB.resultn        | >= | 3.105 TBILL.resultn     | >=          | 0.85        | AST.resultn         | <  | 111         | 0.0022204    | 775 |
| ALB.resultn        | >= | 3.105 TBILL.resultn     | >=          | 0.85        | AST.resultn         | >= | 111         | 0            | 775 |
| TBILL.resultn      | =  | Missing                 |             |             |                     |    |             | -0.000342896 | 776 |
| TBILL.resultn      | <  | 2.35 Sodium.resultn     | =           | Missing     |                     |    |             | 0            | 776 |
| TBILL.resultn      | <  | 2.35 Sodium.resultn     | <           | 138.5       |                     |    |             | 0.001798557  | 776 |
| TBILL.resultn      | <  | 2.35 Sodium.resultn     | >=          | 138.5       |                     |    |             | -7.10E-05    | 776 |
| TBILL.resultn      | >= | 2.35 PLT.resultn        | =           | Missing     |                     |    |             | 0.00208422   | 776 |
| TBILL.resultn      | >= | 2.35 PLT.resultn        | <           | 249.5       |                     |    |             | 0.003419874  | 776 |
| TBILL.resultn      | >= | 2.35 PLT.resultn        | >=          | 249.5       |                     |    |             | 0.000615002  | 776 |
| age.yrs            | =  | Missing                 |             |             |                     |    | Missing     | -0.001755845 | 777 |
| age.yrs            | <  | 53.46338125             |             |             |                     |    | Missing     | -0.002095886 | 777 |
| age.yrs            | >= | 53.46338125             | AST.resultn | =           | Missing             |    | Missing     | -0.000580615 | 777 |
| age.yrs            | >= | 53.46338125             | AST.resultn | <           | 100.5 TBILL.resultn | =  | Missing     | -0.001318615 | 777 |
| age.yrs            | >= | 53.46338125             | AST.resultn | <           | 100.5 TBILL.resultn | <  | 0.75        | -0.002465237 | 777 |
| age.yrs            | >= | 53.46338125             | AST.resultn | <           | 100.5 TBILL.resultn | >= | 0.75        | 0            | 777 |
| age.yrs            | >= | 53.46338125             | AST.resultn | >=          | 100.5               |    | Missing     | 0.002740388  | 777 |
| AST.resultn        | =  | Missing                 |             |             |                     |    | Missing     | -0.003107441 | 778 |
| AST.resultn        | <  | 52.5                    |             |             |                     |    | Missing     | -0.002973303 | 778 |
| AST.resultn        | >= | 52.5 ALB.resultn        | =           | Missing     |                     |    | Missing     | -0.001763357 | 778 |
| AST.resultn        | >= | 52.5 ALB.resultn        | <           | 3.105       |                     |    | Missing     | -0.000523141 | 778 |
| AST.resultn        | >= | 52.5 ALB.resultn        | >=          | 3.105       | age.yrs             | =  | Missing     | -0.001926214 | 778 |
| AST.resultn        | >= | 52.5 ALB.resultn        | >=          | 3.105       | age.yrs             | <  | 53.35934292 | -0.002612262 | 778 |
| AST.resultn        | >= | 52.5 ALB.resultn        | >=          | 3.105       | age.yrs             | >= | 53.35934292 | 0            | 778 |
| ALK.times.uln      | =  | Missing TBILL.resultn   | =           | Missing     |                     |    |             | -0.001618119 | 779 |
| ALK.times.uln      | =  | Missing TBILL.resultn   | <           | 1.15        |                     |    |             | -0.001171346 | 779 |
| ALK.times.uln      | =  | Missing TBILL.resultn   | >=          | 1.15        |                     |    |             | 0.000641632  | 779 |
| ALK.times.uln      | <  | 6.02 PLT.resultn        | =           | Missing     |                     |    |             | 0            | 779 |
| ALK.times.uln      | <  | 6.02 PLT.resultn        | <           | 249.5       |                     |    |             | -0.000848555 | 779 |
| ALK.times.uln      | <  | 6.02 PLT.resultn        | >=          | 249.5       |                     |    |             | -0.001627752 | 779 |
| ALK.times.uln      | >= | 6.02                    |             |             |                     |    |             | 0.000705435  | 779 |
| AST.resultn        | =  | Missing                 |             |             |                     |    | Missing     | -0.004474094 | 780 |
| AST.resultn        | <  | 47.5                    |             |             |                     |    | Missing     | -0.004473444 | 780 |

|               |    |                         |               |                         |               |             |              |              |     |
|---------------|----|-------------------------|---------------|-------------------------|---------------|-------------|--------------|--------------|-----|
| AST.resultn   | >= | 47.5 age.yrs            | =             | Missing                 |               | Missing     | -0.002960168 | 780          |     |
| AST.resultn   | >= | 47.5 age.yrs            | <             | 51.53319644             |               | Missing     | -0.003594985 | 780          |     |
| AST.resultn   | >= | 47.5 age.yrs            | >=            | 51.53319644 psc.yrs.dur | =             | Missing     | -0.001619998 | 780          |     |
| AST.resultn   | >= | 47.5 age.yrs            | >=            | 51.53319644 psc.yrs.dur | <             | 0.465434634 | -0.003471424 | 780          |     |
| AST.resultn   | >= | 47.5 age.yrs            | >=            | 51.53319644 psc.yrs.dur | >=            | 0.465434634 | 0            | 780          |     |
| age.yrs       | =  | Missing                 |               |                         |               | Missing     | -0.003984101 | 781          |     |
| age.yrs       | <  | 51.63175907             |               |                         |               | Missing     | -0.004335273 | 781          |     |
| age.yrs       | >= | 51.63175907 AST.resultn | =             | Missing                 |               | Missing     | -0.003273395 | 781          |     |
| age.yrs       | >= | 51.63175907 AST.resultn | <             | 57                      |               | Missing     | -0.004729443 | 781          |     |
| age.yrs       | >= | 51.63175907 AST.resultn | >=            | 57 psc.yrs.dur          | =             | Missing     | -0.001744543 | 781          |     |
| age.yrs       | >= | 51.63175907 AST.resultn | >=            | 57 psc.yrs.dur          | <             | 0.725530459 | -0.004104808 | 781          |     |
| age.yrs       | >= | 51.63175907 AST.resultn | >=            | 57 psc.yrs.dur          | >=            | 0.725530459 | 0            | 781          |     |
| TBILL.resultn | =  | Missing                 |               |                         |               |             | -0.000507815 | 782          |     |
| TBILL.resultn | <  | 1.65 AST.resultn        | =             | Missing                 |               |             | -0.000735165 | 782          |     |
| TBILL.resultn | <  | 1.65 AST.resultn        | <             | 62                      |               |             | -0.001227351 | 782          |     |
| TBILL.resultn | <  | 1.65 AST.resultn        | >=            | 62                      |               |             | 0            | 782          |     |
| TBILL.resultn | >= | 1.65 PLT.resultn        | =             | Missing                 |               |             | 0.000364957  | 782          |     |
| TBILL.resultn | >= | 1.65 PLT.resultn        | <             | 209                     |               |             | 0.001765593  | 782          |     |
| TBILL.resultn | >= | 1.65 PLT.resultn        | >=            | 209                     |               |             | -0.000335361 | 782          |     |
| ALB.resultn   | =  | Missing                 |               |                         |               | Missing     | -0.004356458 | 783          |     |
| ALB.resultn   | <  | 3.13                    |               |                         |               | Missing     | -0.002149348 | 783          |     |
| ALB.resultn   | >= | 3.13 ALK.times.uln      | =             | Missing                 | TBILL.resultn | =           | Missing      | -0.003402322 | 783 |
| ALB.resultn   | >= | 3.13 ALK.times.uln      | =             | Missing                 | TBILL.resultn | <           | 1.15         | -0.0049275   | 783 |
| ALB.resultn   | >= | 3.13 ALK.times.uln      | =             | Missing                 | TBILL.resultn | >=          | 1.15         | 0            | 783 |
| ALB.resultn   | >= | 3.13 ALK.times.uln      | <             | 6.02                    |               | Missing     | -0.004953938 | 783          |     |
| ALB.resultn   | >= | 3.13 ALK.times.uln      | >=            | 6.02                    |               | Missing     | -0.003067862 | 783          |     |
| AST.resultn   | =  | Missing                 |               |                         |               | Missing     | 0.000333605  | 784          |     |
| AST.resultn   | <  | 52.5                    |               |                         |               | Missing     | -0.000440488 | 784          |     |
| AST.resultn   | >= | 52.5 PLT.resultn        | =             | Missing                 |               | Missing     | 0.001526436  | 784          |     |
| AST.resultn   | >= | 52.5 PLT.resultn        | <             | 209.5                   |               | Missing     | 0.003840208  | 784          |     |
| AST.resultn   | >= | 52.5 PLT.resultn        | >=            | 209.5 TBILL.resultn     | =             | Missing     | 0.000580491  | 784          |     |
| AST.resultn   | >= | 52.5 PLT.resultn        | >=            | 209.5 TBILL.resultn     | <             | 1.25        | 0.000986835  | 784          |     |
| AST.resultn   | >= | 52.5 PLT.resultn        | >=            | 209.5 TBILL.resultn     | >=            | 1.25        | 0            | 784          |     |
| ALB.resultn   | =  | Missing                 |               |                         |               |             | -0.001064628 | 785          |     |
| ALB.resultn   | <  | 3.33 TBILL.resultn      | =             | Missing                 |               |             | 0.000357533  | 785          |     |
| ALB.resultn   | <  | 3.33 TBILL.resultn      | <             | 1.31                    |               |             | -0.000228255 | 785          |     |
| ALB.resultn   | <  | 3.33 TBILL.resultn      | >=            | 1.31                    |               |             | 0.001177636  | 785          |     |
| ALB.resultn   | >= | 3.33 Hemoglobin.resultn | =             | Missing                 |               |             | 0            | 785          |     |
| ALB.resultn   | >= | 3.33 Hemoglobin.resultn | <             | 13.75                   |               |             | -0.000833765 | 785          |     |
| ALB.resultn   | >= | 3.33 Hemoglobin.resultn | >=            | 13.75                   |               |             | -0.001569628 | 785          |     |
| ALB.resultn   | =  | Missing                 |               |                         |               | Missing     | -0.001658755 | 786          |     |
| ALB.resultn   | <  | 2.95                    |               |                         |               | Missing     | 0.001371215  | 786          |     |
| ALB.resultn   | >= | 2.95 Sodium.resultn     | =             | Missing                 |               | Missing     | -0.0013924   | 786          |     |
| ALB.resultn   | >= | 2.95 Sodium.resultn     | <             | 136.5                   |               | Missing     | 0.001360049  | 786          |     |
| ALB.resultn   | >= | 2.95 Sodium.resultn     | >=            | 136.5 psc.yrs.dur       | =             | Missing     | -0.00088657  | 786          |     |
| ALB.resultn   | >= | 2.95 Sodium.resultn     | >=            | 136.5 psc.yrs.dur       | <             | 0.824093087 | -0.001662319 | 786          |     |
| ALB.resultn   | >= | 2.95 Sodium.resultn     | >=            | 136.5 psc.yrs.dur       | >=            | 0.824093087 | 0            | 786          |     |
| ALK.times.uln | =  | Missing                 | TBILL.resultn | =                       | Missing       |             | -0.002491119 | 787          |     |
| ALK.times.uln | =  | Missing                 | TBILL.resultn | <                       | 1.15          |             | -0.002502021 | 787          |     |
| ALK.times.uln | =  | Missing                 | TBILL.resultn | >=                      | 1.15          |             | 0.000224949  | 787          |     |
| ALK.times.uln | <  | 5.92438247 psc.yrs.dur  | =             | Missing                 |               |             | -0.001978346 | 787          |     |
| ALK.times.uln | <  | 5.92438247 psc.yrs.dur  | <             | 8.020533881             |               |             | -0.002208089 | 787          |     |
| ALK.times.uln | <  | 5.92438247 psc.yrs.dur  | >=            | 8.020533881             |               |             | 0            | 787          |     |
| ALK.times.uln | >= | 5.92438247              |               |                         |               |             | -0.000140609 | 787          |     |
| PLT.resultn   | =  | Missing                 |               |                         |               |             | -0.001673272 | 788          |     |
| PLT.resultn   | <  | 195.5 TBILL.resultn     | =             | Missing                 |               |             | 0.000149237  | 788          |     |
| PLT.resultn   | <  | 195.5 TBILL.resultn     | <             | 1.2                     |               |             | -0.000770856 | 788          |     |
| PLT.resultn   | <  | 195.5 TBILL.resultn     | >=            | 1.2                     |               |             | 0.001320265  | 788          |     |
| PLT.resultn   | >= | 195.5 age.yrs           | =             | Missing                 |               |             | -0.001729085 | 788          |     |
| PLT.resultn   | >= | 195.5 age.yrs           | <             | 55.77138946             |               |             | -0.002144514 | 788          |     |
| PLT.resultn   | >= | 195.5 age.yrs           | >=            | 55.77138946             |               |             | 0            | 788          |     |
| TBILL.resultn | =  | Missing                 |               |                         |               | Missing     | -0.001387427 | 789          |     |

|               |    |                         |             |                                |             |             |              |             |     |
|---------------|----|-------------------------|-------------|--------------------------------|-------------|-------------|--------------|-------------|-----|
| TBILL.resultn | <  | 0.95                    |             |                                |             | Missing     | -0.002182392 | 789         |     |
| TBILL.resultn | >= | 0.95 Hemoglobin.resultn | =           | Missing                        |             | Missing     | 0.002066186  | 789         |     |
| TBILL.resultn | >= | 0.95 Hemoglobin.resultn | <           | 13.35 ALK.times.uln            | =           | Missing     | -0.001183013 | 789         |     |
| TBILL.resultn | >= | 0.95 Hemoglobin.resultn | <           | 13.35 ALK.times.uln            | <           | 5.446215139 | -0.001805652 | 789         |     |
| TBILL.resultn | >= | 0.95 Hemoglobin.resultn | <           | 13.35 ALK.times.uln            | >=          | 5.446215139 | 0            | 789         |     |
| TBILL.resultn | >= | 0.95 Hemoglobin.resultn | >=          | 13.35                          |             | Missing     | -0.002021773 | 789         |     |
| TBILL.resultn | =  | Missing                 |             |                                |             |             | 0.000781829  | 790         |     |
| TBILL.resultn | <  | 1.95 Sodium.resultn     | =           | Missing                        |             |             | 0            | 790         |     |
| TBILL.resultn | <  | 1.95 Sodium.resultn     | <           | 137.5                          |             |             | 0.002672498  | 790         |     |
| TBILL.resultn | <  | 1.95 Sodium.resultn     | >=          | 137.5                          |             |             | 0.00054567   | 790         |     |
| TBILL.resultn | >= | 1.95 Hemoglobin.resultn | =           | Missing                        |             |             | 0.001445894  | 790         |     |
| TBILL.resultn | >= | 1.95 Hemoglobin.resultn | <           | 14.05                          |             |             | 0.002179031  | 790         |     |
| TBILL.resultn | >= | 1.95 Hemoglobin.resultn | >=          | 14.05                          |             |             | 0.000834946  | 790         |     |
| PLT.resultn   | =  | Missing                 |             |                                |             |             | 0.000270376  | 791         |     |
| PLT.resultn   | <  | 209.5 ALB.resultn       | =           | Missing                        |             |             | 0.002015618  | 791         |     |
| PLT.resultn   | <  | 209.5 ALB.resultn       | <           | 3.95                           |             |             | 0.005500375  | 791         |     |
| PLT.resultn   | <  | 209.5 ALB.resultn       | >=          | 3.95                           |             |             | 0.000563636  | 791         |     |
| PLT.resultn   | >= | 209.5 psc.yrs.dur       | =           | Missing                        |             |             | 0.000234877  | 791         |     |
| PLT.resultn   | >= | 209.5 psc.yrs.dur       | <           | 0.016427105                    |             |             | 0.00157703   | 791         |     |
| PLT.resultn   | >= | 209.5 psc.yrs.dur       | >=          | 0.016427105                    |             |             | 0            | 791         |     |
| AST.resultn   | =  | Missing                 |             |                                |             | Missing     | -0.002041256 | 792         |     |
| AST.resultn   | <  | 52.5                    |             |                                |             | Missing     | -0.001891988 | 792         |     |
| AST.resultn   | >= | 52.5 age.yrs            | =           | Missing                        |             | Missing     | -0.000522308 | 792         |     |
| AST.resultn   | >= | 52.5 age.yrs            | <           | 51.63175907                    |             | Missing     | -0.001177391 | 792         |     |
| AST.resultn   | >= | 52.5 age.yrs            | >=          | 51.63175907 ALB.resultn        | =           | Missing     | 0.001192469  | 792         |     |
| AST.resultn   | >= | 52.5 age.yrs            | >=          | 51.63175907 ALB.resultn        | <           | 3.805       | 0.00281082   | 792         |     |
| AST.resultn   | >= | 52.5 age.yrs            | >=          | 51.63175907 ALB.resultn        | >=          | 3.805       | 0            | 792         |     |
| age.yrs       | =  | Missing                 |             |                                |             | Missing     | -0.003319875 | 793         |     |
| age.yrs       | <  | 51.57563313             |             |                                |             | Missing     | -0.003683446 | 793         |     |
| age.yrs       | >= | 51.57563313 AST.resultn | =           | Missing                        |             | Missing     | -0.002557265 | 793         |     |
| age.yrs       | >= | 51.57563313 AST.resultn | <           | 51.5                           |             | Missing     | -0.003831319 | 793         |     |
| age.yrs       | >= | 51.57563313 AST.resultn | >=          | 51.5 psc.yrs.dur               | =           | Missing     | -0.00128321  | 793         |     |
| age.yrs       | >= | 51.57563313 AST.resultn | >=          | 51.5 psc.yrs.dur               | <           | 0.741957563 | -0.002505315 | 793         |     |
| age.yrs       | >= | 51.57563313 AST.resultn | >=          | 51.5 psc.yrs.dur               | >=          | 0.741957563 | 0            | 793         |     |
| ALB.resultn   | =  | Missing                 |             |                                |             | Missing     | -0.000566509 | 794         |     |
| ALB.resultn   | <  | 3.13                    |             |                                |             | Missing     | 0.00190476   | 794         |     |
| ALB.resultn   | >= | 3.13 TBILL.resultn      | =           | Missing                        |             | Missing     | 9.80E-05     | 794         |     |
| ALB.resultn   | >= | 3.13 TBILL.resultn      | <           | 0.75                           |             | Missing     | -0.000563157 | 794         |     |
| ALB.resultn   | >= | 3.13 TBILL.resultn      | >=          | 0.75 Sodium.resultn            | =           | Missing     | 0            | 794         |     |
| ALB.resultn   | >= | 3.13 TBILL.resultn      | >=          | 0.75 Sodium.resultn            | <           | 137.5       | 0.004387373  | 794         |     |
| ALB.resultn   | >= | 3.13 TBILL.resultn      | >=          | 0.75 Sodium.resultn            | >=          | 137.5       | 0.000370323  | 794         |     |
| AST.resultn   | =  | Missing                 |             |                                |             | Missing     | -0.002945828 | 795         |     |
| AST.resultn   | <  | 43.5                    |             |                                |             | Missing     | -0.003720076 | 795         |     |
| AST.resultn   | >= | 43.5 age.yrs            | =           | Missing                        |             | Missing     | -0.00248329  | 795         |     |
| AST.resultn   | >= | 43.5 age.yrs            | <           | 51.92060233                    |             | Missing     | -0.002902691 | 795         |     |
| AST.resultn   | >= | 43.5 age.yrs            | >=          | 51.92060233 Hemoglobin.resultn | =           | Missing     | 0            | 795         |     |
| AST.resultn   | >= | 43.5 age.yrs            | >=          | 51.92060233 Hemoglobin.resultn | <           | 14.25       | -0.001894069 | 795         |     |
| AST.resultn   | >= | 43.5 age.yrs            | >=          | 51.92060233 Hemoglobin.resultn | >=          | 14.25       | -0.002658892 | 795         |     |
| ALK.times.uln | =  | Missing                 | ALB.resultn | =                              | Missing     |             | 0            | 796         |     |
| ALK.times.uln | =  | Missing                 | ALB.resultn | <                              | 3.95        |             | 0.00358072   | 796         |     |
| ALK.times.uln | =  | Missing                 | ALB.resultn | >=                             | 3.95        |             | 2.87E-05     | 796         |     |
| ALK.times.uln | <  | 5.462893197             |             |                                |             |             | 0.000473324  | 796         |     |
| ALK.times.uln | >= | 5.462893197 PLT.resultn | =           | Missing                        |             |             | 0.002356579  | 796         |     |
| ALK.times.uln | >= | 5.462893197 PLT.resultn | <           | 272                            |             |             | 0.004210057  | 796         |     |
| ALK.times.uln | >= | 5.462893197 PLT.resultn | >=          | 272                            |             |             | 0.000812013  | 796         |     |
| ALB.resultn   | =  | Missing                 |             |                                |             | Missing     | 2.28E-05     | 797         |     |
| ALB.resultn   | <  | 2.915                   |             |                                |             | Missing     | 0.002904272  | 797         |     |
| ALB.resultn   | >= | 2.915 ALK.times.uln     | =           | Missing                        | PLT.resultn | =           | Missing      | 0           | 797 |
| ALB.resultn   | >= | 2.915 ALK.times.uln     | =           | Missing                        | PLT.resultn | <           | 235          | 0.001700523 | 797 |
| ALB.resultn   | >= | 2.915 ALK.times.uln     | =           | Missing                        | PLT.resultn | >=          | 235          | 2.35E-05    | 797 |
| ALB.resultn   | >= | 2.915 ALK.times.uln     | <           | 5.446215139                    |             | Missing     | 0.000526184  | 797         |     |
| ALB.resultn   | >= | 2.915 ALK.times.uln     | >=          | 5.446215139                    |             | Missing     | 0.002236738  | 797         |     |

|                |    |                           |    |                            |               |             |              |              |     |
|----------------|----|---------------------------|----|----------------------------|---------------|-------------|--------------|--------------|-----|
| ALB.resultn    | =  | Missing                   |    |                            | Missing       |             | -1.20E-05    | 798          |     |
| ALB.resultn    | <  | 2.95                      |    |                            | Missing       |             | 0.001760969  | 798          |     |
| ALB.resultn    | >= | 2.95 PLT.resultn          | =  | Missing                    | Missing       |             | 0.000461932  | 798          |     |
| ALB.resultn    | >= | 2.95 PLT.resultn          | <  | 267.5 ALK.times.uln        | =             | Missing     | 0            | 798          |     |
| ALB.resultn    | >= | 2.95 PLT.resultn          | <  | 267.5 ALK.times.uln        | <             | 2.905037968 | -0.000775528 | 798          |     |
| ALB.resultn    | >= | 2.95 PLT.resultn          | <  | 267.5 ALK.times.uln        | >=            | 2.905037968 | 0.001956838  | 798          |     |
| ALB.resultn    | >= | 2.95 PLT.resultn          | >= | 267.5                      | Missing       |             | -0.000998369 | 798          |     |
| Sodium.resultn | =  | Missing                   |    |                            | Missing       |             | -0.002906321 | 799          |     |
| Sodium.resultn | <  | 136.5                     |    |                            | Missing       |             | 0.000962219  | 799          |     |
| Sodium.resultn | >= | 136.5 ALK.times.uln       | =  | Missing                    | TBILI.resultn | =           | Missing      | -0.002044853 | 799 |
| Sodium.resultn | >= | 136.5 ALK.times.uln       | =  | Missing                    | TBILI.resultn | <           | 1.2          | -0.003367993 | 799 |
| Sodium.resultn | >= | 136.5 ALK.times.uln       | =  | Missing                    | TBILI.resultn | >=          | 1.2          | 0            | 799 |
| Sodium.resultn | >= | 136.5 ALK.times.uln       | <  | 5.727171315                | Missing       |             | Missing      | -0.002897336 | 799 |
| Sodium.resultn | >= | 136.5 ALK.times.uln       | >= | 5.727171315                | Missing       |             | Missing      | -0.001740321 | 799 |
| age.yrs        | =  | Missing                   |    |                            | Missing       |             | Missing      | -0.000617229 | 800 |
| age.yrs        | <  | 69.71800137 ALK.times.uln | =  | Missing                    | Missing       |             | Missing      | -0.000850245 | 800 |
| age.yrs        | <  | 69.71800137 ALK.times.uln | <  | 6.115825908 TBILI.resultn  | =             | Missing     | Missing      | -0.001098358 | 800 |
| age.yrs        | <  | 69.71800137 ALK.times.uln | <  | 6.115825908 TBILI.resultn  | <             | 2.75        | -0.0011876   | 800          |     |
| age.yrs        | <  | 69.71800137 ALK.times.uln | <  | 6.115825908 TBILI.resultn  | >=            | 2.75        | 0            | 800          |     |
| age.yrs        | <  | 69.71800137 ALK.times.uln | >= | 6.115825908                | Missing       |             | Missing      | 0.001076071  | 800 |
| age.yrs        | >= | 69.71800137               |    |                            | Missing       |             | Missing      | 0.005473541  | 800 |
| psc.yrs.dur    | =  | Missing                   |    |                            | Missing       |             | Missing      | -0.003275397 | 801 |
| psc.yrs.dur    | <  | 1.961670089               |    |                            | Missing       |             | Missing      | -0.00372243  | 801 |
| psc.yrs.dur    | >= | 1.961670089 ALK.times.uln | =  | Missing                    | age.yrs       | =           | Missing      | -0.002523286 | 801 |
| psc.yrs.dur    | >= | 1.961670089 ALK.times.uln | =  | Missing                    | age.yrs       | <           | 53.29226557  | -0.004156    | 801 |
| psc.yrs.dur    | >= | 1.961670089 ALK.times.uln | =  | Missing                    | age.yrs       | >=          | 53.29226557  | 0            | 801 |
| psc.yrs.dur    | >= | 1.961670089 ALK.times.uln | <  | 2.822501299                | Missing       |             | Missing      | -0.003638993 | 801 |
| psc.yrs.dur    | >= | 1.961670089 ALK.times.uln | >= | 2.822501299                | Missing       |             | Missing      | 0.001072341  | 801 |
| ALB.resultn    | =  | Missing                   |    |                            | Missing       |             | Missing      | -0.000215369 | 802 |
| ALB.resultn    | <  | 2.965                     |    |                            | Missing       |             | Missing      | 0.002507807  | 802 |
| ALB.resultn    | >= | 2.965 psc.yrs.dur         | =  | Missing                    | Missing       |             | Missing      | 0.000545362  | 802 |
| ALB.resultn    | >= | 2.965 psc.yrs.dur         | <  | 7.823408624 Sodium.resultn | =             | Missing     | 0            | 802          |     |
| ALB.resultn    | >= | 2.965 psc.yrs.dur         | <  | 7.823408624 Sodium.resultn | <             | 138.5       | 0.001422966  | 802          |     |
| ALB.resultn    | >= | 2.965 psc.yrs.dur         | <  | 7.823408624 Sodium.resultn | >=            | 138.5       | 0.000104214  | 802          |     |
| ALB.resultn    | >= | 2.965 psc.yrs.dur         | >= | 7.823408624                | Missing       |             | Missing      | 0.003360107  | 802 |
| psc.yrs.dur    | =  | Missing                   |    |                            | Missing       |             | Missing      | -0.003629608 | 803 |
| psc.yrs.dur    | <  | 6.410677618               |    |                            | Missing       |             | Missing      | -0.003844176 | 803 |
| psc.yrs.dur    | >= | 6.410677618 AST.resultn   | =  | Missing                    | Missing       |             | Missing      | -0.002371196 | 803 |
| psc.yrs.dur    | >= | 6.410677618 AST.resultn   | <  | 41                         | Missing       |             | Missing      | -0.004593305 | 803 |
| psc.yrs.dur    | >= | 6.410677618 AST.resultn   | >= | 41 TBILI.resultn           | =             | Missing     | Missing      | -0.001260142 | 803 |
| psc.yrs.dur    | >= | 6.410677618 AST.resultn   | >= | 41 TBILI.resultn           | <             | 0.95        | -0.0027494   | 803          |     |
| psc.yrs.dur    | >= | 6.410677618 AST.resultn   | >= | 41 TBILI.resultn           | >=            | 0.95        | 0            | 803          |     |
| ALB.resultn    | =  | Missing                   |    |                            |               |             |              | -0.000853665 | 804 |
| ALB.resultn    | <  | 3.31 TBILI.resultn        | =  | Missing                    |               |             |              | 0.000590623  | 804 |
| ALB.resultn    | <  | 3.31 TBILI.resultn        | <  | 1.21                       |               |             |              | -0.000847722 | 804 |
| ALB.resultn    | <  | 3.31 TBILI.resultn        | >= | 1.21                       |               |             |              | 0.002139609  | 804 |
| ALB.resultn    | >= | 3.31 ALK.times.uln        | =  | Missing                    |               |             |              | 0            | 804 |
| ALB.resultn    | >= | 3.31 ALK.times.uln        | <  | 2.822501299                |               |             |              | -0.00085681  | 804 |
| ALB.resultn    | >= | 3.31 ALK.times.uln        | >= | 2.822501299                |               |             |              | 0.0011301    | 804 |
| ALB.resultn    | =  | Missing                   |    |                            |               |             |              | -0.000637405 | 805 |
| ALB.resultn    | <  | 3.31 psc.yrs.dur          | =  | Missing                    |               |             |              | 0.000986113  | 805 |
| ALB.resultn    | <  | 3.31 psc.yrs.dur          | <  | 0.735112936                |               |             |              | -0.00053727  | 805 |
| ALB.resultn    | <  | 3.31 psc.yrs.dur          | >= | 0.735112936                |               |             |              | 0.002183057  | 805 |
| ALB.resultn    | >= | 3.31 AST.resultn          | =  | Missing                    |               |             |              | -0.000528539 | 805 |
| ALB.resultn    | >= | 3.31 AST.resultn          | <  | 47.5                       |               |             |              | -0.001113306 | 805 |
| ALB.resultn    | >= | 3.31 AST.resultn          | >= | 47.5                       |               |             |              | 0            | 805 |
| TBILI.resultn  | =  | Missing                   |    |                            |               |             |              | 1.42E-06     | 806 |
| TBILI.resultn  | <  | 2.35 Sodium.resultn       | =  | Missing                    |               |             |              | 0            | 806 |
| TBILI.resultn  | <  | 2.35 Sodium.resultn       | <  | 137.5                      |               |             |              | 0.001838254  | 806 |
| TBILI.resultn  | <  | 2.35 Sodium.resultn       | >= | 137.5                      |               |             |              | 0.000912084  | 806 |
| TBILI.resultn  | >= | 2.35 PLT.resultn          | =  | Missing                    |               |             |              | 0.001414218  | 806 |
| TBILI.resultn  | >= | 2.35 PLT.resultn          | <  | 209                        |               |             |              | 0.002822795  | 806 |

|                |    |             |                    |    |             |                    |         |              |              |     |
|----------------|----|-------------|--------------------|----|-------------|--------------------|---------|--------------|--------------|-----|
| TBILL.resultn  | >= | 2.35        | PLT.resultn        | >= | 209         |                    |         | 5.64E-06     | 806          |     |
| ALB.resultn    | =  | Missing     |                    |    |             |                    |         | -0.000581117 | 807          |     |
| ALB.resultn    | <  | 3.245       | age.yrs            | =  | Missing     |                    |         | 0.000899908  | 807          |     |
| ALB.resultn    | <  | 3.245       | age.yrs            | <  | 47.33196441 |                    |         | -0.000111081 | 807          |     |
| ALB.resultn    | <  | 3.245       | age.yrs            | >= | 47.33196441 |                    |         | 0.001910898  | 807          |     |
| ALB.resultn    | >= | 3.245       | TBILL.resultn      | =  | Missing     |                    |         | -0.000820165 | 807          |     |
| ALB.resultn    | >= | 3.245       | TBILL.resultn      | <  | 0.85        |                    |         | -0.001308358 | 807          |     |
| ALB.resultn    | >= | 3.245       | TBILL.resultn      | >= | 0.85        |                    |         | 0            | 807          |     |
| ALK.times.uln  | =  | Missing     | TBILL.resultn      | =  | Missing     |                    |         | -0.001864075 | 808          |     |
| ALK.times.uln  | =  | Missing     | TBILL.resultn      | <  | 1.15        |                    |         | -0.001865345 | 808          |     |
| ALK.times.uln  | =  | Missing     | TBILL.resultn      | >= | 1.15        |                    |         | 0.000344925  | 808          |     |
| ALK.times.uln  | <  | 6.02        | PLT.resultn        | =  | Missing     |                    |         | 0            | 808          |     |
| ALK.times.uln  | <  | 6.02        | PLT.resultn        | <  | 242         |                    |         | -0.000858627 | 808          |     |
| ALK.times.uln  | <  | 6.02        | PLT.resultn        | >= | 242         |                    |         | -0.001866108 | 808          |     |
| ALK.times.uln  | >= | 6.02        |                    |    |             |                    |         | 0.000926191  | 808          |     |
| age.yrs        | =  | Missing     |                    |    |             | Missing            |         | -0.006349965 | 809          |     |
| age.yrs        | <  | 49.03353867 |                    |    |             | Missing            |         | -0.006934921 | 809          |     |
| age.yrs        | >= | 49.03353867 | psc.yrs.dur        | =  | Missing     |                    |         | -0.005265495 | 809          |     |
| age.yrs        | >= | 49.03353867 | psc.yrs.dur        | <  | 0.476386037 |                    |         | -0.006835233 | 809          |     |
| age.yrs        | >= | 49.03353867 | psc.yrs.dur        | >= | 0.476386037 | AST.resultn        | =       | Missing      | -0.003798131 | 809 |
| age.yrs        | >= | 49.03353867 | psc.yrs.dur        | >= | 0.476386037 | AST.resultn        | <       | 64           | -0.006427607 | 809 |
| age.yrs        | >= | 49.03353867 | psc.yrs.dur        | >= | 0.476386037 | AST.resultn        | >=      | 64           | 0            | 809 |
| psc.yrs.dur    | =  | Missing     |                    |    |             |                    | Missing | -0.002826532 | 810          |     |
| psc.yrs.dur    | <  | 1.961670089 |                    |    |             |                    | Missing | -0.00323857  | 810          |     |
| psc.yrs.dur    | >= | 1.961670089 | psc.yrs.dur        | =  | Missing     |                    |         | -0.001843134 | 810          |     |
| psc.yrs.dur    | >= | 1.961670089 | psc.yrs.dur        | <  | 2.532511978 |                    |         | 0.001326146  | 810          |     |
| psc.yrs.dur    | >= | 1.961670089 | psc.yrs.dur        | >= | 2.532511978 | Hemoglobin.resultn | =       | Missing      | 0            | 810 |
| psc.yrs.dur    | >= | 1.961670089 | psc.yrs.dur        | >= | 2.532511978 | Hemoglobin.resultn | <       | 15.05        | -0.003655804 | 810 |
| psc.yrs.dur    | >= | 1.961670089 | psc.yrs.dur        | >= | 2.532511978 | Hemoglobin.resultn | >=      | 15.05        | -0.001988758 | 810 |
| Sodium.resultn | =  | Missing     |                    |    |             |                    | Missing | -0.000190106 | 811          |     |
| Sodium.resultn | <  | 136.5       |                    |    |             |                    | Missing | 0.002248484  | 811          |     |
| Sodium.resultn | >= | 136.5       | age.yrs            | =  | Missing     |                    |         | 0.000265875  | 811          |     |
| Sodium.resultn | >= | 136.5       | age.yrs            | <  | 49.22655715 |                    |         | -0.000561316 | 811          |     |
| Sodium.resultn | >= | 136.5       | age.yrs            | >= | 49.22655715 | Sodium.resultn     | =       | Missing      | 0.001492401  | 811 |
| Sodium.resultn | >= | 136.5       | age.yrs            | >= | 49.22655715 | Sodium.resultn     | <       | 138.5        | 0.007213272  | 811 |
| Sodium.resultn | >= | 136.5       | age.yrs            | >= | 49.22655715 | Sodium.resultn     | >=      | 138.5        | 0            | 811 |
| age.yrs        | =  | Missing     |                    |    |             |                    |         | 0.000677005  | 812          |     |
| age.yrs        | <  | 62.00136893 | Sodium.resultn     | =  | Missing     |                    |         | 0            | 812          |     |
| age.yrs        | <  | 62.00136893 | Sodium.resultn     | <  | 136.5       |                    |         | 0.002311187  | 812          |     |
| age.yrs        | <  | 62.00136893 | Sodium.resultn     | >= | 136.5       |                    |         | 0.000675563  | 812          |     |
| age.yrs        | >= | 62.00136893 | AST.resultn        | =  | Missing     |                    |         | 0.001892161  | 812          |     |
| age.yrs        | >= | 62.00136893 | AST.resultn        | <  | 51.5        |                    |         | -0.000155023 | 812          |     |
| age.yrs        | >= | 62.00136893 | AST.resultn        | >= | 51.5        |                    |         | 0.004621739  | 812          |     |
| TBILL.resultn  | =  | Missing     |                    |    |             |                    | Missing | -0.004687896 | 813          |     |
| TBILL.resultn  | <  | 0.95        |                    |    |             |                    | Missing | -0.005370738 | 813          |     |
| TBILL.resultn  | >= | 0.95        | Hemoglobin.resultn | =  | Missing     | age.yrs            | =       | Missing      | -0.001744355 | 813 |
| TBILL.resultn  | >= | 0.95        | Hemoglobin.resultn | =  | Missing     | age.yrs            | <       | 48.64476386  | -0.00348871  | 813 |
| TBILL.resultn  | >= | 0.95        | Hemoglobin.resultn | =  | Missing     | age.yrs            | >=      | 48.64476386  | 0            | 813 |
| TBILL.resultn  | >= | 0.95        | Hemoglobin.resultn | <  | 13.25       |                    |         | Missing      | -0.00372415  | 813 |
| TBILL.resultn  | >= | 0.95        | Hemoglobin.resultn | >= | 13.25       |                    |         | Missing      | -0.005155534 | 813 |
| ALK.times.uln  | =  | Missing     | TBILL.resultn      | =  | Missing     |                    |         | -0.003377888 | 814          |     |
| ALK.times.uln  | =  | Missing     | TBILL.resultn      | <  | 0.95        |                    |         | -0.003388408 | 814          |     |
| ALK.times.uln  | =  | Missing     | TBILL.resultn      | >= | 0.95        |                    |         | 0.000169419  | 814          |     |
| ALK.times.uln  | <  | 5.438574341 | age.yrs            | =  | Missing     |                    |         | -0.00282673  | 814          |     |
| ALK.times.uln  | <  | 5.438574341 | age.yrs            | <  | 69.84257358 |                    |         | -0.003001219 | 814          |     |
| ALK.times.uln  | <  | 5.438574341 | age.yrs            | >= | 69.84257358 |                    |         | 0            | 814          |     |
| ALK.times.uln  | >= | 5.438574341 |                    |    |             |                    |         | -0.001139045 | 814          |     |
| TBILL.resultn  | =  | Missing     |                    |    |             |                    |         | 0.001374554  | 815          |     |
| TBILL.resultn  | <  | 2.35        | Sodium.resultn     | =  | Missing     |                    |         | 0            | 815          |     |
| TBILL.resultn  | <  | 2.35        | Sodium.resultn     | <  | 136.5       |                    |         | 0.00252171   | 815          |     |
| TBILL.resultn  | <  | 2.35        | Sodium.resultn     | >= | 136.5       |                    |         | 0.00044911   | 815          |     |
| TBILL.resultn  | >= | 2.35        | psc.yrs.dur        | =  | Missing     |                    |         | 0.00205251   | 815          |     |

|               |    |                         |    |                         |         |              |              |     |
|---------------|----|-------------------------|----|-------------------------|---------|--------------|--------------|-----|
| TBILL.resultn | >= | 2.35 psc.yrs.dur        | <  | 1.778234086             |         | 0.001018798  | 815          |     |
| TBILL.resultn | >= | 2.35 psc.yrs.dur        | >= | 1.778234086             |         | 0.003292964  | 815          |     |
| age.yrs       | =  | Missing                 |    |                         | Missing | 0.000638281  | 816          |     |
| age.yrs       | <  | 51.53319644             |    |                         | Missing | 0.000294476  | 816          |     |
| age.yrs       | >= | 51.53319644 AST.resultn | =  | Missing                 | Missing | 0.001474564  | 816          |     |
| age.yrs       | >= | 51.53319644 AST.resultn | <  | 52.5                    | Missing | 1.05E-05     | 816          |     |
| age.yrs       | >= | 51.53319644 AST.resultn | >= | 52.5 PLT.resultn        | =       | Missing      | 0.002938583  | 816 |
| age.yrs       | >= | 51.53319644 AST.resultn | >= | 52.5 PLT.resultn        | <       | 252          | 0.004274303  | 816 |
| age.yrs       | >= | 51.53319644 AST.resultn | >= | 52.5 PLT.resultn        | >=      | 252          | 0            | 816 |
| ALB.resultn   | =  | Missing                 |    |                         | Missing | -0.000893094 | 817          |     |
| ALB.resultn   | <  | 2.95                    |    |                         | Missing | 0.002585444  | 817          |     |
| ALB.resultn   | >= | 2.95 ALK.times.uln      | =  | Missing                 | Missing | -0.000175645 | 817          |     |
| ALB.resultn   | >= | 2.95 ALK.times.uln      | <  | 2.815208295             | Missing | -0.000902929 | 817          |     |
| ALB.resultn   | >= | 2.95 ALK.times.uln      | >= | 2.815208295 PLT.resultn | =       | Missing      | 0.000949286  | 817 |
| ALB.resultn   | >= | 2.95 ALK.times.uln      | >= | 2.815208295 PLT.resultn | <       | 210.5        | 0.004487533  | 817 |
| ALB.resultn   | >= | 2.95 ALK.times.uln      | >= | 2.815208295 PLT.resultn | >=      | 210.5        | 0            | 817 |
| psc.yrs.dur   | =  | Missing                 |    |                         | Missing | -0.005318281 | 818          |     |
| psc.yrs.dur   | <  | 1.994524298             |    |                         | Missing | -0.005860505 | 818          |     |
| psc.yrs.dur   | >= | 1.994524298 psc.yrs.dur | =  | Missing                 | Missing | -0.004024173 | 818          |     |
| psc.yrs.dur   | >= | 1.994524298 psc.yrs.dur | <  | 2.902121834             | Missing | -0.001575774 | 818          |     |
| psc.yrs.dur   | >= | 1.994524298 psc.yrs.dur | >= | 2.902121834 age.yrs     | =       | Missing      | -0.004537547 | 818 |
| psc.yrs.dur   | >= | 1.994524298 psc.yrs.dur | >= | 2.902121834 age.yrs     | <       | 60.98699521  | -0.005410152 | 818 |
| psc.yrs.dur   | >= | 1.994524298 psc.yrs.dur | >= | 2.902121834 age.yrs     | >=      | 60.98699521  | 0            | 818 |
| PLT.resultn   | =  | Missing                 |    |                         | Missing | -0.003179799 | 819          |     |
| PLT.resultn   | <  | 185.5                   |    |                         | Missing | -0.000638499 | 819          |     |
| PLT.resultn   | >= | 185.5 Sodium.resultn    | =  | Missing                 | Missing | -0.003469125 | 819          |     |
| PLT.resultn   | >= | 185.5 Sodium.resultn    | <  | 138.5 age.yrs           | =       | Missing      | -0.002056519 | 819 |
| PLT.resultn   | >= | 185.5 Sodium.resultn    | <  | 138.5 age.yrs           | <       | 46.10403833  | -0.00329043  | 819 |
| PLT.resultn   | >= | 185.5 Sodium.resultn    | <  | 138.5 age.yrs           | >=      | 46.10403833  | 0            | 819 |
| PLT.resultn   | >= | 185.5 Sodium.resultn    | >= | 138.5                   | Missing | -0.003010424 | 819          |     |
| TBILL.resultn | =  | Missing                 |    |                         | Missing | -0.001819112 | 820          |     |
| TBILL.resultn | <  | 3.4 ALK.times.uln       | =  | Missing                 | Missing | -0.002402815 | 820          |     |
| TBILL.resultn | <  | 3.4 ALK.times.uln       | <  | 2.822501299             | Missing | -0.00248716  | 820          |     |
| TBILL.resultn | <  | 3.4 ALK.times.uln       | >= | 2.822501299 psc.yrs.dur | =       | Missing      | -0.001382525 | 820 |
| TBILL.resultn | <  | 3.4 ALK.times.uln       | >= | 2.822501299 psc.yrs.dur | <       | 1.924709103  | -0.002150594 | 820 |
| TBILL.resultn | <  | 3.4 ALK.times.uln       | >= | 2.822501299 psc.yrs.dur | >=      | 1.924709103  | 0            | 820 |
| TBILL.resultn | >= | 3.4                     |    |                         | Missing | 0.000469988  | 820          |     |
| TBILL.resultn | =  | Missing                 |    |                         |         | -0.000392102 | 821          |     |
| TBILL.resultn | <  | 1.95 ALK.times.uln      | =  | Missing                 |         | 0            | 821          |     |
| TBILL.resultn | <  | 1.95 ALK.times.uln      | <  | 5.742345433             |         | -0.001380167 | 821          |     |
| TBILL.resultn | <  | 1.95 ALK.times.uln      | >= | 5.742345433             |         | 0.001733296  | 821          |     |
| TBILL.resultn | >= | 1.95 ALK.times.uln      | =  | Missing                 |         | -3.02E-05    | 821          |     |
| TBILL.resultn | >= | 1.95 ALK.times.uln      | <  | 4.241784038             |         | 0.000356497  | 821          |     |
| TBILL.resultn | >= | 1.95 ALK.times.uln      | >= | 4.241784038             |         | -0.000416894 | 821          |     |
| ALB.resultn   | =  | Missing                 |    |                         | Missing | -0.001476857 | 822          |     |
| ALB.resultn   | <  | 3.615 PLT.resultn       | =  | Missing                 | Missing | 0.00037504   | 822          |     |
| ALB.resultn   | <  | 3.615 PLT.resultn       | <  | 210.5                   | Missing | 0.005112247  | 822          |     |
| ALB.resultn   | <  | 3.615 PLT.resultn       | >= | 210.5 ALK.times.uln     | =       | Missing      | -0.000940851 | 822 |
| ALB.resultn   | <  | 3.615 PLT.resultn       | >= | 210.5 ALK.times.uln     | <       | 5.127636888  | -0.001436035 | 822 |
| ALB.resultn   | <  | 3.615 PLT.resultn       | >= | 210.5 ALK.times.uln     | >=      | 5.127636888  | 0            | 822 |
| ALB.resultn   | >= | 3.615                   |    |                         | Missing | -0.000898736 | 822          |     |
| ALK.times.uln | =  | Missing TBILL.resultn   | =  | Missing                 | Missing | -0.001121465 | 823          |     |
| ALK.times.uln | =  | Missing TBILL.resultn   | <  | 0.75                    | Missing | -0.00111584  | 823          |     |
| ALK.times.uln | =  | Missing TBILL.resultn   | >= | 0.75 ALB.resultn        | =       | Missing      | 0.000667733  | 823 |
| ALK.times.uln | =  | Missing TBILL.resultn   | >= | 0.75 ALB.resultn        | <       | 3.95         | 0.001396168  | 823 |
| ALK.times.uln | =  | Missing TBILL.resultn   | >= | 0.75 ALB.resultn        | >=      | 3.95         | 0            | 823 |
| ALK.times.uln | <  | 5.963877551             |    |                         | Missing | -0.000670269 | 823          |     |
| ALK.times.uln | >= | 5.963877551             |    |                         | Missing | 0.001273407  | 823          |     |
| ALB.resultn   | =  | Missing                 |    |                         | Missing | -0.002256961 | 824          |     |
| ALB.resultn   | <  | 2.915                   |    |                         | Missing | -8.77E-06    | 824          |     |
| ALB.resultn   | >= | 2.915 ALK.times.uln     | =  | Missing                 | Missing | -0.001888355 | 824          |     |
| ALB.resultn   | >= | 2.915 ALK.times.uln     | <  | 2.893313702             | Missing | -0.002906114 | 824          |     |

|                |    |             |                    |    |             |               |         |             |              |     |
|----------------|----|-------------|--------------------|----|-------------|---------------|---------|-------------|--------------|-----|
| ALB.resultn    | >= | 2.915       | ALK.times.uln      | >= | 2.893313702 | TBILI.resultn | =       | Missing     | -0.001113947 | 824 |
| ALB.resultn    | >= | 2.915       | ALK.times.uln      | >= | 2.893313702 | TBILI.resultn | <       | 0.85        | -0.002924112 | 824 |
| ALB.resultn    | >= | 2.915       | ALK.times.uln      | >= | 2.893313702 | TBILI.resultn | >=      | 0.85        | 0            | 824 |
| TBILI.resultn  | =  | Missing     |                    |    |             |               |         |             | -0.003766544 | 825 |
| TBILI.resultn  | <  | 2.35        | age.yrs            | =  | Missing     |               |         |             | -0.002978898 | 825 |
| TBILI.resultn  | <  | 2.35        | age.yrs            | <  | 69.76043806 |               |         |             | -0.003166886 | 825 |
| TBILI.resultn  | <  | 2.35        | age.yrs            | >= | 69.76043806 |               |         |             | 0            | 825 |
| TBILI.resultn  | >= | 2.35        | age.yrs            | =  | Missing     |               |         |             | -0.00201525  | 825 |
| TBILI.resultn  | >= | 2.35        | age.yrs            | <  | 46.56947296 |               |         |             | -0.002668581 | 825 |
| TBILI.resultn  | >= | 2.35        | age.yrs            | >= | 46.56947296 |               |         |             | -0.001296586 | 825 |
| ALB.resultn    | =  | Missing     |                    |    |             |               |         |             | 0.0006987    | 826 |
| ALB.resultn    | <  | 3.31        | Hemoglobin.resultn | =  | Missing     |               |         |             | 0.001470352  | 826 |
| ALB.resultn    | <  | 3.31        | Hemoglobin.resultn | <  | 11.85       |               |         |             | 0.002439396  | 826 |
| ALB.resultn    | <  | 3.31        | Hemoglobin.resultn | >= | 11.85       |               |         |             | 0.000582062  | 826 |
| ALB.resultn    | >= | 3.31        | Sodium.resultn     | =  | Missing     |               |         |             | 0            | 826 |
| ALB.resultn    | >= | 3.31        | Sodium.resultn     | <  | 136.5       |               |         |             | 0.002816948  | 826 |
| ALB.resultn    | >= | 3.31        | Sodium.resultn     | >= | 136.5       |               |         |             | 0.000455475  | 826 |
| ALB.resultn    | =  | Missing     |                    |    |             |               | Missing |             | 0.000463614  | 827 |
| ALB.resultn    | <  | 3.245       |                    |    |             |               | Missing |             | 0.002200494  | 827 |
| ALB.resultn    | >= | 3.245       | ALK.times.uln      | =  | Missing     | ALB.resultn   | =       | Missing     | 0.000839686  | 827 |
| ALB.resultn    | >= | 3.245       | ALK.times.uln      | =  | Missing     | ALB.resultn   | <       | 3.95        | 0.002906605  | 827 |
| ALB.resultn    | >= | 3.245       | ALK.times.uln      | =  | Missing     | ALB.resultn   | >=      | 3.95        | 0            | 827 |
| ALB.resultn    | >= | 3.245       | ALK.times.uln      | <  | 5.31953793  |               |         | Missing     | 0.000330866  | 827 |
| ALB.resultn    | >= | 3.245       | ALK.times.uln      | >= | 5.31953793  |               |         | Missing     | 0.002470488  | 827 |
| psc.yrs.dur    | =  | Missing     |                    |    |             |               |         | Missing     | -0.002819139 | 828 |
| psc.yrs.dur    | <  | 6.410677618 |                    |    |             |               |         | Missing     | -0.003096989 | 828 |
| psc.yrs.dur    | >= | 6.410677618 | AST.resultn        | =  | Missing     |               |         | Missing     | -0.001189584 | 828 |
| psc.yrs.dur    | >= | 6.410677618 | AST.resultn        | <  | 44.5        |               |         | Missing     | -0.003694959 | 828 |
| psc.yrs.dur    | >= | 6.410677618 | AST.resultn        | >= | 44.5        | TBILI.resultn | =       | Missing     | 0.000290864  | 828 |
| psc.yrs.dur    | >= | 6.410677618 | AST.resultn        | >= | 44.5        | TBILI.resultn | <       | 1.26        | 0.000610815  | 828 |
| psc.yrs.dur    | >= | 6.410677618 | AST.resultn        | >= | 44.5        | TBILI.resultn | >=      | 1.26        | 0            | 828 |
| ALK.times.uln  | =  | Missing     | ALB.resultn        | =  | Missing     |               |         |             | -0.000397091 | 829 |
| ALK.times.uln  | =  | Missing     | ALB.resultn        | <  | 3.95        |               |         |             | 0.003229149  | 829 |
| ALK.times.uln  | =  | Missing     | ALB.resultn        | >= | 3.95        |               |         |             | -0.000370247 | 829 |
| ALK.times.uln  | <  | 5.462893197 | PLT.resultn        | =  | Missing     |               |         |             | 0.000203495  | 829 |
| ALK.times.uln  | <  | 5.462893197 | PLT.resultn        | <  | 185.5       |               |         |             | 0.002034953  | 829 |
| ALK.times.uln  | <  | 5.462893197 | PLT.resultn        | >= | 185.5       |               |         |             | 0            | 829 |
| ALK.times.uln  | >= | 5.462893197 |                    |    |             |               |         |             | 0.001639417  | 829 |
| TBILI.resultn  | =  | Missing     |                    |    |             |               | Missing |             | -0.004540699 | 830 |
| TBILI.resultn  | <  | 0.95        |                    |    |             |               | Missing |             | -0.004416239 | 830 |
| TBILI.resultn  | >= | 0.95        | age.yrs            | =  | Missing     |               | Missing |             | -0.003019495 | 830 |
| TBILI.resultn  | >= | 0.95        | age.yrs            | <  | 48.73511294 |               | Missing |             | -0.004015387 | 830 |
| TBILI.resultn  | >= | 0.95        | age.yrs            | >= | 48.73511294 | psc.yrs.dur   | =       | Missing     | -0.001539884 | 830 |
| TBILI.resultn  | >= | 0.95        | age.yrs            | >= | 48.73511294 | psc.yrs.dur   | <       | 0.646132786 | -0.003593062 | 830 |
| TBILI.resultn  | >= | 0.95        | age.yrs            | >= | 48.73511294 | psc.yrs.dur   | >=      | 0.646132786 | 0            | 830 |
| ALK.times.uln  | =  | Missing     | AST.resultn        | =  | Missing     |               |         |             | -0.002015205 | 831 |
| ALK.times.uln  | =  | Missing     | AST.resultn        | <  | 100.5       |               |         |             | -0.002753073 | 831 |
| ALK.times.uln  | =  | Missing     | AST.resultn        | >= | 100.5       |               |         |             | -0.000447235 | 831 |
| ALK.times.uln  | <  | 5.92438247  | Hemoglobin.resultn | =  | Missing     |               |         |             | 0            | 831 |
| ALK.times.uln  | <  | 5.92438247  | Hemoglobin.resultn | <  | 14.15       |               |         |             | -0.002175177 | 831 |
| ALK.times.uln  | <  | 5.92438247  | Hemoglobin.resultn | >= | 14.15       |               |         |             | -0.002757112 | 831 |
| ALK.times.uln  | >= | 5.92438247  |                    |    |             |               |         |             | -0.000453806 | 831 |
| ALB.resultn    | =  | Missing     |                    |    |             |               | Missing |             | -0.003231479 | 832 |
| ALB.resultn    | <  | 3.105       |                    |    |             |               | Missing |             | -0.001014326 | 832 |
| ALB.resultn    | >= | 3.105       | PLT.resultn        | =  | Missing     |               | Missing |             | -0.002259838 | 832 |
| ALB.resultn    | >= | 3.105       | PLT.resultn        | <  | 209.5       | TBILI.resultn | =       | Missing     | -0.001955409 | 832 |
| ALB.resultn    | >= | 3.105       | PLT.resultn        | <  | 209.5       | TBILI.resultn | <       | 1.05        | -0.003259014 | 832 |
| ALB.resultn    | >= | 3.105       | PLT.resultn        | <  | 209.5       | TBILI.resultn | >=      | 1.05        | 0            | 832 |
| ALB.resultn    | >= | 3.105       | PLT.resultn        | >= | 209.5       |               | Missing |             | -0.002876561 | 832 |
| Sodium.resultn | =  | Missing     |                    |    |             |               | Missing |             | -0.003220889 | 833 |
| Sodium.resultn | <  | 136.5       |                    |    |             |               | Missing |             | -0.000423887 | 833 |
| Sodium.resultn | >= | 136.5       | age.yrs            | =  | Missing     |               | Missing |             | -0.002821081 | 833 |

|                |    |                            |    |                           |    |             |              |     |
|----------------|----|----------------------------|----|---------------------------|----|-------------|--------------|-----|
| Sodium.resultn | >= | 136.5 age.yrs              | <  | 51.63175907               |    | Missing     | -0.003313009 | 833 |
| Sodium.resultn | >= | 136.5 age.yrs              | >= | 51.63175907 AST.resultn   | =  | Missing     | -0.001962443 | 833 |
| Sodium.resultn | >= | 136.5 age.yrs              | >= | 51.63175907 AST.resultn   | <  | 109.5       | -0.002408453 | 833 |
| Sodium.resultn | >= | 136.5 age.yrs              | >= | 51.63175907 AST.resultn   | >= | 109.5       | 0            | 833 |
| age.yrs        | =  | Missing                    |    |                           |    | Missing     | 0.000849777  | 834 |
| age.yrs        | <  | 67.25941136 Sodium.resultn | =  | Missing PLT.resultn       | =  | Missing     | 0            | 834 |
| age.yrs        | <  | 67.25941136 Sodium.resultn | =  | Missing PLT.resultn       | <  | 207         | 0.002269039  | 834 |
| age.yrs        | <  | 67.25941136 Sodium.resultn | =  | Missing PLT.resultn       | >= | 207         | 0.000478018  | 834 |
| age.yrs        | <  | 67.25941136 Sodium.resultn | <  | 136.5                     |    | Missing     | 0.002912557  | 834 |
| age.yrs        | <  | 67.25941136 Sodium.resultn | >= | 136.5                     |    | Missing     | 0.000576733  | 834 |
| age.yrs        | >= | 67.25941136                |    |                           |    | Missing     | 0.004297284  | 834 |
| age.yrs        | =  | Missing                    |    |                           |    | Missing     | -0.002995515 | 835 |
| age.yrs        | <  | 53.35797399                |    |                           |    | Missing     | -0.003177922 | 835 |
| age.yrs        | >= | 53.35797399 AST.resultn    | =  | Missing                   |    | Missing     | -0.002525368 | 835 |
| age.yrs        | >= | 53.35797399 AST.resultn    | <  | 54.5                      |    | Missing     | -0.003639987 | 835 |
| age.yrs        | >= | 53.35797399 AST.resultn    | >= | 54.5 psc.yrs.dur          | =  | Missing     | -0.00130942  | 835 |
| age.yrs        | >= | 53.35797399 AST.resultn    | >= | 54.5 psc.yrs.dur          | <  | 0.427104723 | -0.002541816 | 835 |
| age.yrs        | >= | 53.35797399 AST.resultn    | >= | 54.5 psc.yrs.dur          | >= | 0.427104723 | 0            | 835 |
| ALB.resultn    | =  | Missing                    |    |                           |    | Missing     | -0.003865678 | 836 |
| ALB.resultn    | <  | 2.875                      |    |                           |    | Missing     | -0.001890377 | 836 |
| ALB.resultn    | >= | 2.875 psc.yrs.dur          | =  | Missing                   |    | Missing     | -0.003789802 | 836 |
| ALB.resultn    | >= | 2.875 psc.yrs.dur          | <  | 6.410677618               |    | Missing     | -0.004064365 | 836 |
| ALB.resultn    | >= | 2.875 psc.yrs.dur          | >= | 6.410677618 AST.resultn   | =  | Missing     | -0.002050906 | 836 |
| ALB.resultn    | >= | 2.875 psc.yrs.dur          | >= | 6.410677618 AST.resultn   | <  | 44.5        | -0.004394799 | 836 |
| ALB.resultn    | >= | 2.875 psc.yrs.dur          | >= | 6.410677618 AST.resultn   | >= | 44.5        | 0            | 836 |
| Sodium.resultn | =  | Missing                    |    |                           |    | Missing     | -0.000225775 | 837 |
| Sodium.resultn | <  | 136.5                      |    |                           |    | Missing     | 0.002547736  | 837 |
| Sodium.resultn | >= | 136.5 ALB.resultn          | =  | Missing                   |    | Missing     | 0.00045136   | 837 |
| Sodium.resultn | >= | 136.5 ALB.resultn          | <  | 3.08                      |    | Missing     | 0.002844898  | 837 |
| Sodium.resultn | >= | 136.5 ALB.resultn          | >= | 3.08 TBILL.resultn        | =  | Missing     | 0.000271395  | 837 |
| Sodium.resultn | >= | 136.5 ALB.resultn          | >= | 3.08 TBILL.resultn        | <  | 1.15        | 0.000365553  | 837 |
| Sodium.resultn | >= | 136.5 ALB.resultn          | >= | 3.08 TBILL.resultn        | >= | 1.15        | 0            | 837 |
| ALB.resultn    | =  | Missing                    |    |                           |    | Missing     | -0.001886473 | 838 |
| ALB.resultn    | <  | 2.95                       |    |                           |    | Missing     | -0.000745453 | 838 |
| ALB.resultn    | >= | 2.95 psc.yrs.dur           | =  | Missing                   |    | Missing     | -0.002390133 | 838 |
| ALB.resultn    | >= | 2.95 psc.yrs.dur           | <  | 7.739904175               |    | Missing     | -0.002473815 | 838 |
| ALB.resultn    | >= | 2.95 psc.yrs.dur           | >= | 7.739904175 TBILL.resultn | =  | Missing     | -0.001605121 | 838 |
| ALB.resultn    | >= | 2.95 psc.yrs.dur           | >= | 7.739904175 TBILL.resultn | <  | 1.1         | -0.003064323 | 838 |
| ALB.resultn    | >= | 2.95 psc.yrs.dur           | >= | 7.739904175 TBILL.resultn | >= | 1.1         | 0            | 838 |
| Sodium.resultn | =  | Missing                    |    |                           |    | Missing     | -0.000439704 | 839 |
| Sodium.resultn | <  | 136.5                      |    |                           |    | Missing     | 0.002435805  | 839 |
| Sodium.resultn | >= | 136.5 ALK.times.uln        | =  | Missing                   |    | Missing     | 0.000776602  | 839 |
| Sodium.resultn | >= | 136.5 ALK.times.uln        | <  | 2.85059761                |    | Missing     | -0.000166323 | 839 |
| Sodium.resultn | >= | 136.5 ALK.times.uln        | >= | 2.85059761 PLT.resultn    | =  | Missing     | 0.001335126  | 839 |
| Sodium.resultn | >= | 136.5 ALK.times.uln        | >= | 2.85059761 PLT.resultn    | <  | 268         | 0.003827361  | 839 |
| Sodium.resultn | >= | 136.5 ALK.times.uln        | >= | 2.85059761 PLT.resultn    | >= | 268         | 0            | 839 |
| ALK.times.uln  | =  | Missing TBILL.resultn      | =  | Missing                   |    |             | 0.00018619   | 840 |
| ALK.times.uln  | =  | Missing TBILL.resultn      | <  | 0.95                      |    |             | -0.000895031 | 840 |
| ALK.times.uln  | =  | Missing TBILL.resultn      | >= | 0.95                      |    |             | 0.001928159  | 840 |
| ALK.times.uln  | <  | 5.438574341                |    |                           |    |             | -0.000513272 | 840 |
| ALK.times.uln  | >= | 5.438574341 AST.resultn    | =  | Missing                   |    |             | 0.000926641  | 840 |
| ALK.times.uln  | >= | 5.438574341 AST.resultn    | <  | 137                       |    |             | 0.001787094  | 840 |
| ALK.times.uln  | >= | 5.438574341 AST.resultn    | >= | 137                       |    |             | 0            | 840 |
| TBILL.resultn  | =  | Missing                    |    |                           |    | Missing     | 0.000610757  | 841 |
| TBILL.resultn  | <  | 1.55                       |    |                           |    | Missing     | 2.14E-05     | 841 |
| TBILL.resultn  | >= | 1.55 PLT.resultn           | =  | Missing                   |    | Missing     | 0.001425875  | 841 |
| TBILL.resultn  | >= | 1.55 PLT.resultn           | <  | 206.5                     |    | Missing     | 0.00455821   | 841 |
| TBILL.resultn  | >= | 1.55 PLT.resultn           | >= | 206.5 Sodium.resultn      | =  | Missing     | 0.000530922  | 841 |
| TBILL.resultn  | >= | 1.55 PLT.resultn           | >= | 206.5 Sodium.resultn      | <  | 138.5       | 0.001306884  | 841 |
| TBILL.resultn  | >= | 1.55 PLT.resultn           | >= | 206.5 Sodium.resultn      | >= | 138.5       | 0            | 841 |
| ALB.resultn    | =  | Missing                    |    |                           |    | Missing     | 0.000664728  | 842 |
| ALB.resultn    | <  | 2.875                      |    |                           |    | Missing     | 0.003477012  | 842 |



|               |    |             |                |    |             |                       |              |              |     |
|---------------|----|-------------|----------------|----|-------------|-----------------------|--------------|--------------|-----|
| ALB.resultn   | >= | 2.875       | TBILL.resultn  | =  | Missing     | Missing               | 0.000494154  | 842          |     |
| ALB.resultn   | >= | 2.875       | TBILL.resultn  | <  | 1.65        | Missing               | 0.000458283  | 842          |     |
| ALB.resultn   | >= | 2.875       | TBILL.resultn  | >= | 1.65        | Hemoglobin.resultn =  | Missing      | 0.000723468  | 842 |
| ALB.resultn   | >= | 2.875       | TBILL.resultn  | >= | 1.65        | Hemoglobin.resultn <  | 13.6         | 0.001663976  | 842 |
| ALB.resultn   | >= | 2.875       | TBILL.resultn  | >= | 1.65        | Hemoglobin.resultn >= | 13.6         | 0            | 842 |
| psc.yrs.dur   | =  | Missing     |                |    |             | Missing               | -0.003951468 | 843          |     |
| psc.yrs.dur   | <  | 1.916495551 |                |    |             | Missing               | -0.004256802 | 843          |     |
| psc.yrs.dur   | >= | 1.916495551 | AST.resultn    | =  | Missing     | Missing               | -0.003222737 | 843          |     |
| psc.yrs.dur   | >= | 1.916495551 | AST.resultn    | <  | 64          | Missing               | -0.004218512 | 843          |     |
| psc.yrs.dur   | >= | 1.916495551 | AST.resultn    | >= | 64          | age.yrs =             | Missing      | -0.001946901 | 843 |
| psc.yrs.dur   | >= | 1.916495551 | AST.resultn    | >= | 64          | age.yrs <             | 48.38603696  | -0.004153389 | 843 |
| psc.yrs.dur   | >= | 1.916495551 | AST.resultn    | >= | 64          | age.yrs >=            | 48.38603696  | 0            | 843 |
| ALK.times.uln | =  | Missing     |                |    |             | Missing               | -0.000161886 | 844          |     |
| ALK.times.uln | <  | 5.92438247  | ALB.resultn    | =  | Missing     | Missing               | -0.000656281 | 844          |     |
| ALK.times.uln | <  | 5.92438247  | ALB.resultn    | <  | 3.225       | Missing               | 0.001618546  | 844          |     |
| ALK.times.uln | <  | 5.92438247  | ALB.resultn    | >= | 3.225       | Sodium.resultn =      | Missing      | 0            | 844 |
| ALK.times.uln | <  | 5.92438247  | ALB.resultn    | >= | 3.225       | Sodium.resultn <      | 138.5        | 0.001613507  | 844 |
| ALK.times.uln | <  | 5.92438247  | ALB.resultn    | >= | 3.225       | Sodium.resultn >=     | 138.5        | -0.000668002 | 844 |
| ALK.times.uln | >= | 5.92438247  |                |    |             | Missing               | 0.001703934  | 844          |     |
| ALB.resultn   | =  | Missing     |                |    |             | Missing               | -0.001434523 | 845          |     |
| ALB.resultn   | <  | 2.915       |                |    |             | Missing               | 0.001367584  | 845          |     |
| ALB.resultn   | >= | 2.915       | Sodium.resultn | =  | Missing     | Missing               | -0.001710706 | 845          |     |
| ALB.resultn   | >= | 2.915       | Sodium.resultn | <  | 136.5       | Missing               | 0.001269853  | 845          |     |
| ALB.resultn   | >= | 2.915       | Sodium.resultn | >= | 136.5       | Hemoglobin.resultn =  | Missing      | 0            | 845 |
| ALB.resultn   | >= | 2.915       | Sodium.resultn | >= | 136.5       | Hemoglobin.resultn <  | 12.65        | -0.001653347 | 845 |
| ALB.resultn   | >= | 2.915       | Sodium.resultn | >= | 136.5       | Hemoglobin.resultn >= | 12.65        | -0.001455716 | 845 |
| age.yrs       | =  | Missing     |                |    |             | Missing               | -0.004114889 | 846          |     |
| age.yrs       | <  | 54.39972621 |                |    |             | Missing               | -0.004356263 | 846          |     |
| age.yrs       | >= | 54.39972621 | AST.resultn    | =  | Missing     | Missing               | -0.00345466  | 846          |     |
| age.yrs       | >= | 54.39972621 | AST.resultn    | <  | 52.5        | Missing               | -0.004918638 | 846          |     |
| age.yrs       | >= | 54.39972621 | AST.resultn    | >= | 52.5        | TBILL.resultn =       | Missing      | -0.001649088 | 846 |
| age.yrs       | >= | 54.39972621 | AST.resultn    | >= | 52.5        | TBILL.resultn <       | 1.25         | -0.002517029 | 846 |
| age.yrs       | >= | 54.39972621 | AST.resultn    | >= | 52.5        | TBILL.resultn >=      | 1.25         | 0            | 846 |
| ALK.times.uln | =  | Missing     | PLT.resultn    | =  | Missing     |                       | -0.002082852 | 847          |     |
| ALK.times.uln | =  | Missing     | PLT.resultn    | <  | 208.5       |                       | 0.001291072  | 847          |     |
| ALK.times.uln | =  | Missing     | PLT.resultn    | >= | 208.5       |                       | -0.001595505 | 847          |     |
| ALK.times.uln | <  | 5.963877551 | TBILL.resultn  | =  | Missing     |                       | -0.001659336 | 847          |     |
| ALK.times.uln | <  | 5.963877551 | TBILL.resultn  | <  | 2.7         |                       | -0.001806365 | 847          |     |
| ALK.times.uln | <  | 5.963877551 | TBILL.resultn  | >= | 2.7         |                       | 0            | 847          |     |
| ALK.times.uln | >= | 5.963877551 |                |    |             |                       | 0.000254159  | 847          |     |
| TBILL.resultn | =  | Missing     |                |    |             | Missing               | -0.00064754  | 848          |     |
| TBILL.resultn | <  | 1.25        |                |    |             | Missing               | -0.000381695 | 848          |     |
| TBILL.resultn | >= | 1.25        | age.yrs        | =  | Missing     | Missing               | 0.001174209  | 848          |     |
| TBILL.resultn | >= | 1.25        | age.yrs        | <  | 54.30527036 | ALB.resultn =         | Missing      | 0.000478683  | 848 |
| TBILL.resultn | >= | 1.25        | age.yrs        | <  | 54.30527036 | ALB.resultn <         | 3.635        | 0.001607006  | 848 |
| TBILL.resultn | >= | 1.25        | age.yrs        | <  | 54.30527036 | ALB.resultn >=        | 3.635        | 0            | 848 |
| TBILL.resultn | >= | 1.25        | age.yrs        | >= | 54.30527036 |                       | Missing      | 0.003538998  | 848 |
| ALB.resultn   | =  | Missing     |                |    |             |                       | 0.00043484   | 849          |     |
| ALB.resultn   | <  | 3.31        | TBILL.resultn  | =  | Missing     |                       | 0.001825927  | 849          |     |
| ALB.resultn   | <  | 3.31        | TBILL.resultn  | <  | 1.31        |                       | 0.000932629  | 849          |     |
| ALB.resultn   | <  | 3.31        | TBILL.resultn  | >= | 1.31        |                       | 0.003125268  | 849          |     |
| ALB.resultn   | >= | 3.31        | Sodium.resultn | =  | Missing     |                       | 0            | 849          |     |
| ALB.resultn   | >= | 3.31        | Sodium.resultn | <  | 136.5       |                       | 0.002099301  | 849          |     |
| ALB.resultn   | >= | 3.31        | Sodium.resultn | >= | 136.5       |                       | 0.00034212   | 849          |     |
| ALK.times.uln | =  | Missing     | TBILL.resultn  | =  | Missing     |                       | -0.001103827 | 850          |     |
| ALK.times.uln | =  | Missing     | TBILL.resultn  | <  | 1.15        |                       | -0.001109749 | 850          |     |
| ALK.times.uln | =  | Missing     | TBILL.resultn  | >= | 1.15        |                       | 0.002917887  | 850          |     |
| ALK.times.uln | <  | 5.965616681 | TBILL.resultn  | =  | Missing     |                       | -0.000694094 | 850          |     |
| ALK.times.uln | <  | 5.965616681 | TBILL.resultn  | <  | 0.85        |                       | -0.00111055  | 850          |     |
| ALK.times.uln | <  | 5.965616681 | TBILL.resultn  | >= | 0.85        |                       | 0            | 850          |     |
| ALK.times.uln | >= | 5.965616681 |                |    |             |                       | 0.001849875  | 850          |     |
| psc.yrs.dur   | =  | Missing     |                |    |             | Missing               | -0.002940978 | 851          |     |

|               |    |             |                |    |             |               |              |              |              |     |
|---------------|----|-------------|----------------|----|-------------|---------------|--------------|--------------|--------------|-----|
| psc.yrs.dur   | <  | 6.410677618 |                |    |             | Missing       | -0.00318739  | 851          |              |     |
| psc.yrs.dur   | >= | 6.410677618 | AST.resultn    | =  | Missing     | Missing       | -0.001582558 | 851          |              |     |
| psc.yrs.dur   | >= | 6.410677618 | AST.resultn    | <  | 89.5        | AST.resultn   | =            | Missing      | -0.002035815 | 851 |
| psc.yrs.dur   | >= | 6.410677618 | AST.resultn    | <  | 89.5        | AST.resultn   | <            | 43           | -0.003800187 | 851 |
| psc.yrs.dur   | >= | 6.410677618 | AST.resultn    | <  | 89.5        | AST.resultn   | >=           | 43           | 0            | 851 |
| psc.yrs.dur   | >= | 6.410677618 | AST.resultn    | >= | 89.5        |               | Missing      | -0.000313439 | 851          |     |
| ALB.resultn   | =  | Missing     |                |    |             | Missing       | -0.002397658 | 852          |              |     |
| ALB.resultn   | <  | 2.95        |                |    |             | Missing       | 0.000266841  | 852          |              |     |
| ALB.resultn   | >= | 2.95        | psc.yrs.dur    | =  | Missing     | Missing       | -0.002095055 | 852          |              |     |
| ALB.resultn   | >= | 2.95        | psc.yrs.dur    | <  | 6.246406571 | Missing       | -0.002241266 | 852          |              |     |
| ALB.resultn   | >= | 2.95        | psc.yrs.dur    | >= | 6.246406571 | age.yrs       | =            | Missing      | -0.000832327 | 852 |
| ALB.resultn   | >= | 2.95        | psc.yrs.dur    | >= | 6.246406571 | age.yrs       | <            | 51.64818617  | -0.001831119 | 852 |
| ALB.resultn   | >= | 2.95        | psc.yrs.dur    | >= | 6.246406571 | age.yrs       | >=           | 51.64818617  | 0            | 852 |
| ALK.times.uln | =  | Missing     |                |    |             | Missing       | -0.003350178 | 853          |              |     |
| ALK.times.uln | <  | 5.412513212 | PLT.resultn    | =  | Missing     | Missing       | -0.004188053 | 853          |              |     |
| ALK.times.uln | <  | 5.412513212 | PLT.resultn    | <  | 209.5       | ALK.times.uln | =            | Missing      | -0.002281103 | 853 |
| ALK.times.uln | <  | 5.412513212 | PLT.resultn    | <  | 209.5       | ALK.times.uln | <            | 1.596488294  | -0.004182022 | 853 |
| ALK.times.uln | <  | 5.412513212 | PLT.resultn    | <  | 209.5       | ALK.times.uln | >=           | 1.596488294  | 0            | 853 |
| ALK.times.uln | <  | 5.412513212 | PLT.resultn    | >= | 209.5       |               | Missing      | -0.00383941  | 853          |     |
| ALK.times.uln | >= | 5.412513212 |                |    |             | Missing       | -0.001866214 | 853          |              |     |
| PLT.resultn   | =  | Missing     |                |    |             | Missing       | 0.000454406  | 854          |              |     |
| PLT.resultn   | <  | 170.5       |                |    |             | Missing       | 0.004695798  | 854          |              |     |
| PLT.resultn   | >= | 170.5       | ALK.times.uln  | =  | Missing     | ALB.resultn   | =            | Missing      | 0.000799496  | 854 |
| PLT.resultn   | >= | 170.5       | ALK.times.uln  | =  | Missing     | ALB.resultn   | <            | 3.95         | 0.001918791  | 854 |
| PLT.resultn   | >= | 170.5       | ALK.times.uln  | =  | Missing     | ALB.resultn   | >=           | 3.95         | 0            | 854 |
| PLT.resultn   | >= | 170.5       | ALK.times.uln  | <  | 5.438574341 |               | Missing      | 0.000245894  | 854          |     |
| PLT.resultn   | >= | 170.5       | ALK.times.uln  | >= | 5.438574341 |               | Missing      | 0.00211734   | 854          |     |
| psc.yrs.dur   | =  | Missing     |                |    |             | Missing       | -0.002068369 | 855          |              |     |
| psc.yrs.dur   | <  | 2.05065024  |                |    |             | Missing       | -0.002373097 | 855          |              |     |
| psc.yrs.dur   | >= | 2.05065024  | ALK.times.uln  | =  | Missing     | Missing       | -0.001264056 | 855          |              |     |
| psc.yrs.dur   | >= | 2.05065024  | ALK.times.uln  | <  | 2.682608696 |               | Missing      | -0.002170466 | 855          |     |
| psc.yrs.dur   | >= | 2.05065024  | ALK.times.uln  | >= | 2.682608696 | PLT.resultn   | =            | Missing      | -2.69E-05    | 855 |
| psc.yrs.dur   | >= | 2.05065024  | ALK.times.uln  | >= | 2.682608696 | PLT.resultn   | <            | 279.5        | -5.39E-05    | 855 |
| psc.yrs.dur   | >= | 2.05065024  | ALK.times.uln  | >= | 2.682608696 | PLT.resultn   | >=           | 279.5        | 0            | 855 |
| ALK.times.uln | =  | Missing     |                |    |             | Missing       | -0.000707876 | 856          |              |     |
| ALK.times.uln | <  | 5.412513212 | Sodium.resultn | =  | Missing     | TBILI.resultn | =            | Missing      | -0.001033302 | 856 |
| ALK.times.uln | <  | 5.412513212 | Sodium.resultn | =  | Missing     | TBILI.resultn | <            | 1.05         | -0.001325322 | 856 |
| ALK.times.uln | <  | 5.412513212 | Sodium.resultn | =  | Missing     | TBILI.resultn | >=           | 1.05         | 0            | 856 |
| ALK.times.uln | <  | 5.412513212 | Sodium.resultn | <  | 137.5       |               | Missing      | 0.001772326  | 856          |     |
| ALK.times.uln | <  | 5.412513212 | Sodium.resultn | >= | 137.5       |               | Missing      | -0.001322354 | 856          |     |
| ALK.times.uln | >= | 5.412513212 |                |    |             | Missing       | 0.001330229  | 856          |              |     |
| AST.resultn   | =  | Missing     |                |    |             | Missing       | -0.000950766 | 857          |              |     |
| AST.resultn   | <  | 43.5        |                |    |             | Missing       | -0.000951386 | 857          |              |     |
| AST.resultn   | >= | 43.5        | age.yrs        | =  | Missing     | Missing       | 0.000597011  | 857          |              |     |
| AST.resultn   | >= | 43.5        | age.yrs        | <  | 53.4715948  |               | Missing      | 5.20E-05     | 857          |     |
| AST.resultn   | >= | 43.5        | age.yrs        | >= | 53.4715948  | PLT.resultn   | =            | Missing      | 0.002246101  | 857 |
| AST.resultn   | >= | 43.5        | age.yrs        | >= | 53.4715948  | PLT.resultn   | <            | 251.5        | 0.003957416  | 857 |
| AST.resultn   | >= | 43.5        | age.yrs        | >= | 53.4715948  | PLT.resultn   | >=           | 251.5        | 0            | 857 |
| AST.resultn   | =  | Missing     |                |    |             | Missing       | -0.000983295 | 858          |              |     |
| AST.resultn   | <  | 52.5        |                |    |             | Missing       | -0.000995526 | 858          |              |     |
| AST.resultn   | >= | 52.5        | age.yrs        | =  | Missing     | Missing       | 0.000374683  | 858          |              |     |
| AST.resultn   | >= | 52.5        | age.yrs        | <  | 55.80971937 |               | Missing      | 0.000188182  | 858          |     |
| AST.resultn   | >= | 52.5        | age.yrs        | >= | 55.80971937 | ALB.resultn   | =            | Missing      | 0.001143065  | 858 |
| AST.resultn   | >= | 52.5        | age.yrs        | >= | 55.80971937 | ALB.resultn   | <            | 4.15         | 0.002022346  | 858 |
| AST.resultn   | >= | 52.5        | age.yrs        | >= | 55.80971937 | ALB.resultn   | >=           | 4.15         | 0            | 858 |
| AST.resultn   | =  | Missing     |                |    |             | Missing       | -2.01E-05    | 859          |              |     |
| AST.resultn   | <  | 208.5       | TBILI.resultn  | =  | Missing     | Missing       | 0.000470907  | 859          |              |     |
| AST.resultn   | <  | 208.5       | TBILI.resultn  | <  | 0.85        |               | Missing      | -3.30E-05    | 859          |     |
| AST.resultn   | <  | 208.5       | TBILI.resultn  | >= | 0.85        | ALB.resultn   | =            | Missing      | 0            | 859 |
| AST.resultn   | <  | 208.5       | TBILI.resultn  | >= | 0.85        | ALB.resultn   | <            | 3.25         | 0.002107517  | 859 |
| AST.resultn   | <  | 208.5       | TBILI.resultn  | >= | 0.85        | ALB.resultn   | >=           | 3.25         | 0.001215441  | 859 |
| AST.resultn   | >= | 208.5       |                |    |             | Missing       | 0.003617306  | 859          |              |     |

|               |    |                           |               |                            |              |             |              |              |     |
|---------------|----|---------------------------|---------------|----------------------------|--------------|-------------|--------------|--------------|-----|
| PLT.resultn   | =  | Missing                   |               |                            |              | Missing     | -0.001240376 | 860          |     |
| PLT.resultn   | <  | 170                       |               |                            |              | Missing     | 0.001763293  | 860          |     |
| PLT.resultn   | >= | 170 age.yrs               | =             | Missing                    |              | Missing     | -0.001615966 | 860          |     |
| PLT.resultn   | >= | 170 age.yrs               | <             | 53.35797399                |              | Missing     | -0.00180438  | 860          |     |
| PLT.resultn   | >= | 170 age.yrs               | >=            | 53.35797399 AST.resultn    | =            | Missing     | -0.001181163 | 860          |     |
| PLT.resultn   | >= | 170 age.yrs               | >=            | 53.35797399 AST.resultn    | <            | 51.5        | -0.002159841 | 860          |     |
| PLT.resultn   | >= | 170 age.yrs               | >=            | 53.35797399 AST.resultn    | >=           | 51.5        | 0            | 860          |     |
| ALB.resultn   | =  | Missing                   |               |                            |              | Missing     | -0.001606386 | 861          |     |
| ALB.resultn   | <  | 2.915                     |               |                            |              | Missing     | 0.000721842  | 861          |     |
| ALB.resultn   | >= | 2.915 TBILI.resultn       | =             | Missing                    |              | Missing     | -0.001641796 | 861          |     |
| ALB.resultn   | >= | 2.915 TBILI.resultn       | <             | 2.45                       |              | Missing     | -0.001753229 | 861          |     |
| ALB.resultn   | >= | 2.915 TBILI.resultn       | >=            | 2.45 AST.resultn           | =            | Missing     | -0.000549753 | 861          |     |
| ALB.resultn   | >= | 2.915 TBILI.resultn       | >=            | 2.45 AST.resultn           | <            | 111         | -0.001099505 | 861          |     |
| ALB.resultn   | >= | 2.915 TBILI.resultn       | >=            | 2.45 AST.resultn           | >=           | 111         | 0            | 861          |     |
| psc.yrs.dur   | =  | Missing                   |               |                            |              |             | -0.001326173 | 862          |     |
| psc.yrs.dur   | <  | 6.410677618 age.yrs       | =             | Missing                    |              |             | -0.001525932 | 862          |     |
| psc.yrs.dur   | <  | 6.410677618 age.yrs       | <             | 63.16084873                |              |             | -0.001745041 | 862          |     |
| psc.yrs.dur   | <  | 6.410677618 age.yrs       | >=            | 63.16084873                |              |             | 0            | 862          |     |
| psc.yrs.dur   | >= | 6.410677618 AST.resultn   | =             | Missing                    |              |             | 0.000110808  | 862          |     |
| psc.yrs.dur   | >= | 6.410677618 AST.resultn   | <             | 47                         |              |             | -0.002195515 | 862          |     |
| psc.yrs.dur   | >= | 6.410677618 AST.resultn   | >=            | 47                         |              |             | 0.001874467  | 862          |     |
| TBILI.resultn | =  | Missing                   |               |                            |              | Missing     | 0.000127983  | 863          |     |
| TBILI.resultn | <  | 0.75                      |               |                            |              | Missing     | -0.001398797 | 863          |     |
| TBILI.resultn | >= | 0.75 Hemoglobin.resultn   | =             | Missing                    | ALB.resultn  | =           | Missing      | 0.00183971   | 863 |
| TBILI.resultn | >= | 0.75 Hemoglobin.resultn   | =             | Missing                    | ALB.resultn  | <           | 3.95         | 0.004783245  | 863 |
| TBILI.resultn | >= | 0.75 Hemoglobin.resultn   | =             | Missing                    | ALB.resultn  | >=          | 3.95         | 0            | 863 |
| TBILI.resultn | >= | 0.75 Hemoglobin.resultn   | <             | 11.85                      |              | Missing     | 0.000196948  | 863          |     |
| TBILI.resultn | >= | 0.75 Hemoglobin.resultn   | >=            | 11.85                      |              | Missing     | -0.000544615 | 863          |     |
| ALK.times.uln | =  | Missing                   | ALB.resultn   | =                          | Missing      |             | -0.001205551 | 864          |     |
| ALK.times.uln | =  | Missing                   | ALB.resultn   | <                          | 3.55         |             | 0.00114211   | 864          |     |
| ALK.times.uln | =  | Missing                   | ALB.resultn   | >=                         | 3.55         |             | -0.000524369 | 864          |     |
| ALK.times.uln | <  | 5.446215139               |               |                            |              |             | -0.000732117 | 864          |     |
| ALK.times.uln | >= | 5.446215139 PLT.resultn   | =             | Missing                    |              |             | 0.000852186  | 864          |     |
| ALK.times.uln | >= | 5.446215139 PLT.resultn   | <             | 278                        |              |             | 0.001789592  | 864          |     |
| ALK.times.uln | >= | 5.446215139 PLT.resultn   | >=            | 278                        |              |             | 0            | 864          |     |
| ALK.times.uln | =  | Missing                   | TBILI.resultn | =                          | Missing      | Missing     | -0.002212883 | 865          |     |
| ALK.times.uln | =  | Missing                   | TBILI.resultn | <                          | 0.75         | Missing     | -0.0022161   | 865          |     |
| ALK.times.uln | =  | Missing                   | TBILI.resultn | >=                         | 0.75 age.yrs | =           | Missing      | -0.001026895 | 865 |
| ALK.times.uln | =  | Missing                   | TBILI.resultn | >=                         | 0.75 age.yrs | <           | 50.7063655   | -0.00215648  | 865 |
| ALK.times.uln | =  | Missing                   | TBILI.resultn | >=                         | 0.75 age.yrs | >=          | 50.7063655   | 0            | 865 |
| ALK.times.uln | <  | 5.438574341               |               |                            |              | Missing     | -0.00165457  | 865          |     |
| ALK.times.uln | >= | 5.438574341               |               |                            |              | Missing     | 0.000117569  | 865          |     |
| age.yrs       | =  | Missing                   |               |                            |              | Missing     | -0.004762754 | 866          |     |
| age.yrs       | <  | 48.84462697               |               |                            |              | Missing     | -0.00525725  | 866          |     |
| age.yrs       | >= | 48.84462697 TBILI.resultn | =             | Missing                    |              | Missing     | -0.003906692 | 866          |     |
| age.yrs       | >= | 48.84462697 TBILI.resultn | <             | 1.5                        |              | Missing     | -0.004470245 | 866          |     |
| age.yrs       | >= | 48.84462697 TBILI.resultn | >=            | 1.5 age.yrs                | =            | Missing     | -0.001962433 | 866          |     |
| age.yrs       | >= | 48.84462697 TBILI.resultn | >=            | 1.5 age.yrs                | <            | 54.30527036 | -0.003924867 | 866          |     |
| age.yrs       | >= | 48.84462697 TBILI.resultn | >=            | 1.5 age.yrs                | >=           | 54.30527036 | 0            | 866          |     |
| TBILI.resultn | =  | Missing                   |               |                            |              |             | -0.000554125 | 867          |     |
| TBILI.resultn | <  | 1.95 Sodium.resultn       | =             | Missing                    |              |             | 0            | 867          |     |
| TBILI.resultn | <  | 1.95 Sodium.resultn       | <             | 136.5                      |              |             | 0.003061129  | 867          |     |
| TBILI.resultn | <  | 1.95 Sodium.resultn       | >=            | 136.5                      |              |             | -8.09E-05    | 867          |     |
| TBILI.resultn | >= | 1.95 Hemoglobin.resultn   | =             | Missing                    |              |             | 0.000798914  | 867          |     |
| TBILI.resultn | >= | 1.95 Hemoglobin.resultn   | <             | 13.15                      |              |             | 0.002257543  | 867          |     |
| TBILI.resultn | >= | 1.95 Hemoglobin.resultn   | >=            | 13.15                      |              |             | -0.000527113 | 867          |     |
| ALB.resultn   | =  | Missing                   |               |                            |              | Missing     | -0.001564949 | 868          |     |
| ALB.resultn   | <  | 2.825                     |               |                            |              | Missing     | 0.001600979  | 868          |     |
| ALB.resultn   | >= | 2.825 age.yrs             | =             | Missing                    |              | Missing     | -0.0007997   | 868          |     |
| ALB.resultn   | >= | 2.825 age.yrs             | <             | 51.63175907                |              | Missing     | -0.001317788 | 868          |     |
| ALB.resultn   | >= | 2.825 age.yrs             | >=            | 51.63175907 Sodium.resultn | =            | Missing     | 0            | 868          |     |
| ALB.resultn   | >= | 2.825 age.yrs             | >=            | 51.63175907 Sodium.resultn | <            | 137.5       | 0.002109322  | 868          |     |

|                |    |                    |                |                     |                  |             |         |              |              |     |
|----------------|----|--------------------|----------------|---------------------|------------------|-------------|---------|--------------|--------------|-----|
| ALB.resultn    | >= | 2.825 age.yrs      | >=             | 51.63175907         | Sodium.resultn   | >=          | 137.5   | -0.000484362 | 868          |     |
| Sodium.resultn | =  | Missing            |                |                     |                  |             | Missing | -0.001646498 | 869          |     |
| Sodium.resultn | <  | 136.5              |                |                     |                  |             | Missing | 0.000893913  | 869          |     |
| Sodium.resultn | >= | 136.5 age.yrs      | =              | Missing             |                  |             | Missing | -0.001923909 | 869          |     |
| Sodium.resultn | >= | 136.5 age.yrs      | <              | 52.12457221         |                  |             | Missing | -0.002268006 | 869          |     |
| Sodium.resultn | >= | 136.5 age.yrs      | >=             | 52.12457221         | AST.resultn      | =           | Missing | -0.001282946 | 869          |     |
| Sodium.resultn | >= | 136.5 age.yrs      | >=             | 52.12457221         | AST.resultn      | <           | 50.5    | -0.002375825 | 869          |     |
| Sodium.resultn | >= | 136.5 age.yrs      | >=             | 52.12457221         | AST.resultn      | >=          | 50.5    | 0            | 869          |     |
| AST.resultn    | =  | Missing            |                |                     |                  |             | Missing | -0.001329842 | 870          |     |
| AST.resultn    | <  | 42.5               |                |                     |                  |             | Missing | -0.001333236 | 870          |     |
| AST.resultn    | >= | 42.5 TBILL.resultn | =              | Missing             |                  |             | Missing | 8.17E-05     | 870          |     |
| AST.resultn    | >= | 42.5 TBILL.resultn | <              | 0.75                |                  |             | Missing | -0.000867998 | 870          |     |
| AST.resultn    | >= | 42.5 TBILL.resultn | >=             | 0.75 PLT.resultn    | =                | Missing     |         | 0.000531033  | 870          |     |
| AST.resultn    | >= | 42.5 TBILL.resultn | >=             | 0.75 PLT.resultn    | <                | 206         |         | 0.002124132  | 870          |     |
| AST.resultn    | >= | 42.5 TBILL.resultn | >=             | 0.75 PLT.resultn    | >=               | 206         |         | 0            | 870          |     |
| age.yrs        | =  | Missing            |                |                     |                  |             | Missing | 0.000688927  | 871          |     |
| age.yrs        | <  | 51.57563313        |                |                     |                  |             | Missing | 0.000492496  | 871          |     |
| age.yrs        | >= | 51.57563313        | AST.resultn    | =                   | Missing          |             | Missing | 0.00112406   | 871          |     |
| age.yrs        | >= | 51.57563313        | AST.resultn    | <                   | 52.5             |             | Missing | -2.50E-05    | 871          |     |
| age.yrs        | >= | 51.57563313        | AST.resultn    | >=                  | 52.5 PLT.resultn | =           | Missing | 0.002397338  | 871          |     |
| age.yrs        | >= | 51.57563313        | AST.resultn    | >=                  | 52.5 PLT.resultn | <           | 251.5   | 0.003543891  | 871          |     |
| age.yrs        | >= | 51.57563313        | AST.resultn    | >=                  | 52.5 PLT.resultn | >=          | 251.5   | 0            | 871          |     |
| ALB.resultn    | =  | Missing            |                |                     |                  |             | Missing | -0.000591793 | 872          |     |
| ALB.resultn    | <  | 2.95               |                |                     |                  |             | Missing | 0.001240922  | 872          |     |
| ALB.resultn    | >= | 2.95 ALB.resultn   | =              | Missing             |                  |             | Missing | -0.000678499 | 872          |     |
| ALB.resultn    | >= | 2.95 ALB.resultn   | <              | 3.275               |                  |             | Missing | -0.001097461 | 872          |     |
| ALB.resultn    | >= | 2.95 ALB.resultn   | >=             | 3.275 TBILL.resultn | =                | Missing     |         | -0.000656964 | 872          |     |
| ALB.resultn    | >= | 2.95 ALB.resultn   | >=             | 3.275 TBILL.resultn | <                | 0.75        |         | -0.001386194 | 872          |     |
| ALB.resultn    | >= | 2.95 ALB.resultn   | >=             | 3.275 TBILL.resultn | >=               | 0.75        |         | 0            | 872          |     |
| ALB.resultn    | =  | Missing            |                |                     |                  |             | Missing | -0.001553157 | 873          |     |
| ALB.resultn    | <  | 2.915              |                |                     |                  |             | Missing | 0.001592514  | 873          |     |
| ALB.resultn    | >= | 2.915              | ALK.times.uln  | =                   | Missing          | age.yrs     | =       | Missing      | -0.001505737 | 873 |
| ALB.resultn    | >= | 2.915              | ALK.times.uln  | =                   | Missing          | age.yrs     | <       | 53.32648871  | -0.002211551 | 873 |
| ALB.resultn    | >= | 2.915              | ALK.times.uln  | =                   | Missing          | age.yrs     | >=      | 53.32648871  | 0            | 873 |
| ALB.resultn    | >= | 2.915              | ALK.times.uln  | <                   | 5.963877551      |             | Missing | -0.001980952 | 873          |     |
| ALB.resultn    | >= | 2.915              | ALK.times.uln  | >=                  | 5.963877551      |             | Missing | 0.000539516  | 873          |     |
| ALK.times.uln  | =  | Missing            | psc.yrs.dur    | =                   | Missing          |             |         | 0.000346606  | 874          |     |
| ALK.times.uln  | =  | Missing            | psc.yrs.dur    | <                   | 7.659137577      |             |         | -0.000366297 | 874          |     |
| ALK.times.uln  | =  | Missing            | psc.yrs.dur    | >=                  | 7.659137577      |             |         | 0.00235951   | 874          |     |
| ALK.times.uln  | <  | 5.412513212        | Sodium.resultn | =                   | Missing          |             |         | 0            | 874          |     |
| ALK.times.uln  | <  | 5.412513212        | Sodium.resultn | <                   | 136.5            |             |         | 0.002334287  | 874          |     |
| ALK.times.uln  | <  | 5.412513212        | Sodium.resultn | >=                  | 136.5            |             |         | -0.000392759 | 874          |     |
| ALK.times.uln  | >= | 5.412513212        |                |                     |                  |             |         | 0.001288795  | 874          |     |
| psc.yrs.dur    | =  | Missing            |                |                     |                  |             |         | -0.002413714 | 875          |     |
| psc.yrs.dur    | <  | 6.561259411        | age.yrs        | =                   | Missing          |             |         | -0.002588158 | 875          |     |
| psc.yrs.dur    | <  | 6.561259411        | age.yrs        | <                   | 69.84257358      |             |         | -0.00273966  | 875          |     |
| psc.yrs.dur    | <  | 6.561259411        | age.yrs        | >=                  | 69.84257358      |             |         | 0            | 875          |     |
| psc.yrs.dur    | >= | 6.561259411        | TBILL.resultn  | =                   | Missing          |             |         | -0.001390619 | 875          |     |
| psc.yrs.dur    | >= | 6.561259411        | TBILL.resultn  | <                   | 0.95             |             |         | -0.002343176 | 875          |     |
| psc.yrs.dur    | >= | 6.561259411        | TBILL.resultn  | >=                  | 0.95             |             |         | -0.000494095 | 875          |     |
| ALB.resultn    | =  | Missing            |                |                     |                  |             | Missing | 0.000714931  | 876          |     |
| ALB.resultn    | <  | 2.965              |                |                     |                  |             | Missing | 0.003382099  | 876          |     |
| ALB.resultn    | >= | 2.965              | PLT.resultn    | =                   | Missing          |             | Missing | 0.000793752  | 876          |     |
| ALB.resultn    | >= | 2.965              | PLT.resultn    | <                   | 210              | ALB.resultn | =       | Missing      | 0.000825935  | 876 |
| ALB.resultn    | >= | 2.965              | PLT.resultn    | <                   | 210              | ALB.resultn | <       | 3.95         | 0.003055958  | 876 |
| ALB.resultn    | >= | 2.965              | PLT.resultn    | <                   | 210              | ALB.resultn | >=      | 3.95         | 0            | 876 |
| ALB.resultn    | >= | 2.965              | PLT.resultn    | >=                  | 210              |             | Missing | 9.32E-05     | 876          |     |
| PLT.resultn    | =  | Missing            |                |                     |                  |             | Missing | -0.003118301 | 877          |     |
| PLT.resultn    | <  | 183.5              |                |                     |                  |             | Missing | -0.000169113 | 877          |     |
| PLT.resultn    | >= | 183.5              | age.yrs        | =                   | Missing          |             | Missing | -0.002794804 | 877          |     |
| PLT.resultn    | >= | 183.5              | age.yrs        | <                   | 53.55509925      |             | Missing | -0.003118754 | 877          |     |
| PLT.resultn    | >= | 183.5              | age.yrs        | >=                  | 53.55509925      | psc.yrs.dur | =       | Missing      | -0.001743617 | 877 |

|                |    |                         |    |                         |    |             |              |     |
|----------------|----|-------------------------|----|-------------------------|----|-------------|--------------|-----|
| PLT.resultn    | >= | 183.5 age.yrs           | >= | 53.55509925 psc.yrs.dur | <  | 0.741957563 | -0.00275604  | 877 |
| PLT.resultn    | >= | 183.5 age.yrs           | >= | 53.55509925 psc.yrs.dur | >= | 0.741957563 | 0            | 877 |
| Sodium.resultn | =  | Missing                 |    |                         |    | Missing     | -0.000173029 | 878 |
| Sodium.resultn | <  | 136.5                   |    |                         |    | Missing     | 0.0037711    | 878 |
| Sodium.resultn | >= | 136.5 AST.resultn       | =  | Missing                 |    | Missing     | -5.60E-05    | 878 |
| Sodium.resultn | >= | 136.5 AST.resultn       | <  | 52.5                    |    | Missing     | -0.000802866 | 878 |
| Sodium.resultn | >= | 136.5 AST.resultn       | >= | 52.5 TBILI.resultn      | =  | Missing     | 0.000659726  | 878 |
| Sodium.resultn | >= | 136.5 AST.resultn       | >= | 52.5 TBILI.resultn      | <  | 1.45        | 0.001089315  | 878 |
| Sodium.resultn | >= | 136.5 AST.resultn       | >= | 52.5 TBILI.resultn      | >= | 1.45        | 0            | 878 |
| PLT.resultn    | =  | Missing                 |    |                         |    | Missing     | -0.003154932 | 879 |
| PLT.resultn    | <  | 185.5                   |    |                         |    | Missing     | -0.000292937 | 879 |
| PLT.resultn    | >= | 185.5 Sodium.resultn    | =  | Missing                 |    | Missing     | -0.003726575 | 879 |
| PLT.resultn    | >= | 185.5 Sodium.resultn    | <  | 138.5 age.yrs           | =  | Missing     | -0.002495052 | 879 |
| PLT.resultn    | >= | 185.5 Sodium.resultn    | <  | 138.5 age.yrs           | <  | 50.75838467 | -0.0039505   | 879 |
| PLT.resultn    | >= | 185.5 Sodium.resultn    | <  | 138.5 age.yrs           | >= | 50.75838467 | 0            | 879 |
| PLT.resultn    | >= | 185.5 Sodium.resultn    | >= | 138.5                   |    | Missing     | -0.003239231 | 879 |
| Sodium.resultn | =  | Missing                 |    |                         |    |             | -0.001912348 | 880 |
| Sodium.resultn | <  | 136.5 Sodium.resultn    | =  | Missing                 |    |             | 0.000319846  | 880 |
| Sodium.resultn | <  | 136.5 Sodium.resultn    | <  | 135.5                   |    |             | -0.001122438 | 880 |
| Sodium.resultn | <  | 136.5 Sodium.resultn    | >= | 135.5                   |    |             | 0.001906358  | 880 |
| Sodium.resultn | >= | 136.5 ALK.times.uln     | =  | Missing                 |    |             | 0            | 880 |
| Sodium.resultn | >= | 136.5 ALK.times.uln     | <  | 3.205636071             |    |             | -0.002127605 | 880 |
| Sodium.resultn | >= | 136.5 ALK.times.uln     | >= | 3.205636071             |    |             | -0.000952468 | 880 |
| ALB.resultn    | =  | Missing                 |    |                         |    |             | 0.001387916  | 881 |
| ALB.resultn    | <  | 3.31 Hemoglobin.resultn | =  | Missing                 |    |             | 0.001453456  | 881 |
| ALB.resultn    | <  | 3.31 Hemoglobin.resultn | <  | 12.4                    |    |             | 0.001069447  | 881 |
| ALB.resultn    | <  | 3.31 Hemoglobin.resultn | >= | 12.4                    |    |             | 0.001914267  | 881 |
| ALB.resultn    | >= | 3.31 TBILI.resultn      | =  | Missing                 |    |             | 0.00092591   | 881 |
| ALB.resultn    | >= | 3.31 TBILI.resultn      | <  | 2.25                    |    |             | 0.001002643  | 881 |
| ALB.resultn    | >= | 3.31 TBILI.resultn      | >= | 2.25                    |    |             | 0            | 881 |
| TBILI.resultn  | =  | Missing                 |    |                         |    |             | 0.001895559  | 882 |
| TBILI.resultn  | <  | 1.95 Sodium.resultn     | =  | Missing                 |    |             | 0            | 882 |
| TBILI.resultn  | <  | 1.95 Sodium.resultn     | <  | 136.5                   |    |             | 0.00215366   | 882 |
| TBILI.resultn  | <  | 1.95 Sodium.resultn     | >= | 136.5                   |    |             | 0.000582502  | 882 |
| TBILI.resultn  | >= | 1.95 PLT.resultn        | =  | Missing                 |    |             | 0.002154972  | 882 |
| TBILI.resultn  | >= | 1.95 PLT.resultn        | <  | 225.5                   |    |             | 0.004128657  | 882 |
| TBILI.resultn  | >= | 1.95 PLT.resultn        | >= | 225.5                   |    |             | 0.000921418  | 882 |
| ALK.times.uln  | =  | Missing TBILI.resultn   | =  | Missing                 |    |             | -0.000181018 | 883 |
| ALK.times.uln  | =  | Missing TBILI.resultn   | <  | 1.15                    |    |             | -0.000896792 | 883 |
| ALK.times.uln  | =  | Missing TBILI.resultn   | >= | 1.15                    |    |             | 0.001518943  | 883 |
| ALK.times.uln  | <  | 5.92438247 age.yrs      | =  | Missing                 |    |             | -0.000575454 | 883 |
| ALK.times.uln  | <  | 5.92438247 age.yrs      | <  | 49.02395619             |    |             | -0.000906468 | 883 |
| ALK.times.uln  | <  | 5.92438247 age.yrs      | >= | 49.02395619             |    |             | 0            | 883 |
| ALK.times.uln  | >= | 5.92438247              |    |                         |    |             | 0.002722397  | 883 |
| TBILI.resultn  | =  | Missing                 |    |                         |    |             | -0.001344458 | 884 |
| TBILI.resultn  | <  | 2.05 age.yrs            | =  | Missing                 |    |             | -0.002678656 | 884 |
| TBILI.resultn  | <  | 2.05 age.yrs            | <  | 70.54620123             |    |             | -0.002813942 | 884 |
| TBILI.resultn  | <  | 2.05 age.yrs            | >= | 70.54620123             |    |             | 0            | 884 |
| TBILI.resultn  | >= | 2.05 PLT.resultn        | =  | Missing                 |    |             | -0.001690457 | 884 |
| TBILI.resultn  | >= | 2.05 PLT.resultn        | <  | 209                     |    |             | -0.000395573 | 884 |
| TBILI.resultn  | >= | 2.05 PLT.resultn        | >= | 209                     |    |             | -0.002440127 | 884 |
| ALB.resultn    | =  | Missing                 |    |                         |    | Missing     | -0.000785004 | 885 |
| ALB.resultn    | <  | 2.875                   |    |                         |    | Missing     | 0.002508306  | 885 |
| ALB.resultn    | >= | 2.875 PLT.resultn       | =  | Missing                 |    | Missing     | 0.000456853  | 885 |
| ALB.resultn    | >= | 2.875 PLT.resultn       | <  | 267.5 ALB.resultn       | =  | Missing     | 0.00023485   | 885 |
| ALB.resultn    | >= | 2.875 PLT.resultn       | <  | 267.5 ALB.resultn       | <  | 3.585       | 0.001769206  | 885 |
| ALB.resultn    | >= | 2.875 PLT.resultn       | <  | 267.5 ALB.resultn       | >= | 3.585       | 0            | 885 |
| ALB.resultn    | >= | 2.875 PLT.resultn       | >= | 267.5                   |    | Missing     | -0.000809605 | 885 |
| TBILI.resultn  | =  | Missing                 |    |                         |    |             | 0.000821111  | 886 |
| TBILI.resultn  | <  | 2.35 Sodium.resultn     | =  | Missing                 |    |             | 0            | 886 |
| TBILI.resultn  | <  | 2.35 Sodium.resultn     | <  | 142.5                   |    |             | 0.000186864  | 886 |
| TBILI.resultn  | <  | 2.35 Sodium.resultn     | >= | 142.5                   |    |             | 0.002142366  | 886 |

|                |    |             |                    |    |         |                |         |              |              |     |
|----------------|----|-------------|--------------------|----|---------|----------------|---------|--------------|--------------|-----|
| TBILL.resultn  | >= | 2.35        | PLT.resultn        | =  | Missing |                |         | 0.002092885  | 886          |     |
| TBILL.resultn  | >= | 2.35        | PLT.resultn        | <  | 225.5   |                |         | 0.003967367  | 886          |     |
| TBILL.resultn  | >= | 2.35        | PLT.resultn        | >= | 225.5   |                |         | 0.000650975  | 886          |     |
| ALB.resultn    | =  | Missing     |                    |    |         |                | Missing | -0.002273504 | 887          |     |
| ALB.resultn    | <  | 2.915       |                    |    |         |                | Missing | -0.00078209  | 887          |     |
| ALB.resultn    | >= | 2.915       | Hemoglobin.resultn | =  | Missing | TBILL.resultn  | =       | Missing      | -0.002088003 | 887 |
| ALB.resultn    | >= | 2.915       | Hemoglobin.resultn | =  | Missing | TBILL.resultn  | <       | 0.75         | -0.003569811 | 887 |
| ALB.resultn    | >= | 2.915       | Hemoglobin.resultn | =  | Missing | TBILL.resultn  | >=      | 0.75         | 0            | 887 |
| ALB.resultn    | >= | 2.915       | Hemoglobin.resultn | <  | 14.85   |                | Missing | -0.003308725 | 887          |     |
| ALB.resultn    | >= | 2.915       | Hemoglobin.resultn | >= | 14.85   |                | Missing | -0.002856735 | 887          |     |
| age.yrs        | =  | Missing     |                    |    |         |                | Missing | 0.000675967  | 888          |     |
| age.yrs        | <  | 54.91991786 |                    |    |         |                | Missing | 0.000430294  | 888          |     |
| age.yrs        | >= | 54.91991786 | TBILL.resultn      | =  | Missing |                | Missing | 0.001525046  | 888          |     |
| age.yrs        | >= | 54.91991786 | TBILL.resultn      | <  | 1.25    | Sodium.resultn | =       | Missing      | 0            | 888 |
| age.yrs        | >= | 54.91991786 | TBILL.resultn      | <  | 1.25    | Sodium.resultn | <       | 139.5        | 0.003802816  | 888 |
| age.yrs        | >= | 54.91991786 | TBILL.resultn      | <  | 1.25    | Sodium.resultn | >=      | 139.5        | 1.06E-05     | 888 |
| age.yrs        | >= | 54.91991786 | TBILL.resultn      | >= | 1.25    |                | Missing | 0.003488052  | 888          |     |
| ALB.resultn    | =  | Missing     |                    |    |         |                | Missing | -0.000412721 | 889          |     |
| ALB.resultn    | <  | 2.915       |                    |    |         |                | Missing | 0.001729306  | 889          |     |
| ALB.resultn    | >= | 2.915       | TBILL.resultn      | =  | Missing |                | Missing | -0.000348514 | 889          |     |
| ALB.resultn    | >= | 2.915       | TBILL.resultn      | <  | 1.65    |                | Missing | -0.000496819 | 889          |     |
| ALB.resultn    | >= | 2.915       | TBILL.resultn      | >= | 1.65    | PLT.resultn    | =       | Missing      | 0.000561089  | 889 |
| ALB.resultn    | >= | 2.915       | TBILL.resultn      | >= | 1.65    | PLT.resultn    | <       | 209          | 0.001428228  | 889 |
| ALB.resultn    | >= | 2.915       | TBILL.resultn      | >= | 1.65    | PLT.resultn    | >=      | 209          | 0            | 889 |
| ALB.resultn    | =  | Missing     |                    |    |         |                | Missing | -0.001171319 | 890          |     |
| ALB.resultn    | <  | 2.915       |                    |    |         |                | Missing | 0.001184751  | 890          |     |
| ALB.resultn    | >= | 2.915       | TBILL.resultn      | =  | Missing |                | Missing | -0.000451777 | 890          |     |
| ALB.resultn    | >= | 2.915       | TBILL.resultn      | <  | 0.85    |                | Missing | -0.001048853 | 890          |     |
| ALB.resultn    | >= | 2.915       | TBILL.resultn      | >= | 0.85    | PLT.resultn    | =       | Missing      | 0.000348698  | 890 |
| ALB.resultn    | >= | 2.915       | TBILL.resultn      | >= | 0.85    | PLT.resultn    | <       | 204.5        | 0.001784515  | 890 |
| ALB.resultn    | >= | 2.915       | TBILL.resultn      | >= | 0.85    | PLT.resultn    | >=      | 204.5        | 0            | 890 |
| Sodium.resultn | =  | Missing     | TBILL.resultn      | =  | Missing |                |         | -0.001601296 | 891          |     |
| Sodium.resultn | =  | Missing     | TBILL.resultn      | <  | 1.25    |                |         | -0.001942906 | 891          |     |
| Sodium.resultn | =  | Missing     | TBILL.resultn      | >= | 1.25    |                |         | 0            | 891          |     |
| Sodium.resultn | <  | 136.5       |                    |    |         |                |         | 0.001245918  | 891          |     |
| Sodium.resultn | >= | 136.5       | PLT.resultn        | =  | Missing |                |         | -0.001293308 | 891          |     |
| Sodium.resultn | >= | 136.5       | PLT.resultn        | <  | 197.5   |                |         | -6.37E-05    | 891          |     |
| Sodium.resultn | >= | 136.5       | PLT.resultn        | >= | 197.5   |                |         | -0.001523866 | 891          |     |
| ALK.times.uln  | =  | Missing     | ALB.resultn        | =  | Missing |                |         | -0.00114201  | 892          |     |
| ALK.times.uln  | =  | Missing     | ALB.resultn        | <  | 3.95    |                |         | 0.002703233  | 892          |     |
| ALK.times.uln  | =  | Missing     | ALB.resultn        | >= | 3.95    |                |         | -0.001153997 | 892          |     |
| ALK.times.uln  | <  | 5.446215139 | PLT.resultn        | =  | Missing |                |         | 0            | 892          |     |
| ALK.times.uln  | <  | 5.446215139 | PLT.resultn        | <  | 185.5   |                |         | 0.002158821  | 892          |     |
| ALK.times.uln  | <  | 5.446215139 | PLT.resultn        | >= | 185.5   |                |         | -0.001149755 | 892          |     |
| ALK.times.uln  | >= | 5.446215139 |                    |    |         |                |         | 0.001241426  | 892          |     |
| age.yrs        | =  | Missing     |                    |    |         |                | Missing | -0.002209213 | 893          |     |
| age.yrs        | <  | 51.63175907 |                    |    |         |                | Missing | -0.002503869 | 893          |     |
| age.yrs        | >= | 51.63175907 | TBILL.resultn      | =  | Missing |                | Missing | -0.001556495 | 893          |     |
| age.yrs        | >= | 51.63175907 | TBILL.resultn      | <  | 1.6     | ALK.times.uln  | =       | Missing      | 0            | 893 |
| age.yrs        | >= | 51.63175907 | TBILL.resultn      | <  | 1.6     | ALK.times.uln  | <       | 2.549718196  | -0.002773489 | 893 |
| age.yrs        | >= | 51.63175907 | TBILL.resultn      | <  | 1.6     | ALK.times.uln  | >=      | 2.549718196  | -0.001345429 | 893 |
| age.yrs        | >= | 51.63175907 | TBILL.resultn      | >= | 1.6     |                | Missing | -0.000156727 | 893          |     |
| TBILL.resultn  | =  | Missing     |                    |    |         |                |         | -5.70E-06    | 894          |     |
| TBILL.resultn  | <  | 1.65        | Sodium.resultn     | =  | Missing |                |         | 0            | 894          |     |
| TBILL.resultn  | <  | 1.65        | Sodium.resultn     | <  | 137.5   |                |         | 0.002315967  | 894          |     |
| TBILL.resultn  | <  | 1.65        | Sodium.resultn     | >= | 137.5   |                |         | 0.000873765  | 894          |     |
| TBILL.resultn  | >= | 1.65        | Hemoglobin.resultn | =  | Missing |                |         | 0.001094159  | 894          |     |
| TBILL.resultn  | >= | 1.65        | Hemoglobin.resultn | <  | 12.9    |                |         | 0.00174323   | 894          |     |
| TBILL.resultn  | >= | 1.65        | Hemoglobin.resultn | >= | 12.9    |                |         | 0.000639809  | 894          |     |
| psc.yrs.dur    | =  | Missing     |                    |    |         |                | Missing | 0.000152813  | 895          |     |
| psc.yrs.dur    | <  | 1.861738535 |                    |    |         |                | Missing | -0.000220706 | 895          |     |
| psc.yrs.dur    | >= | 1.861738535 | ALB.resultn        | =  | Missing |                | Missing | 0.000980227  | 895          |     |

|                |    |             |                    |    |             |                    |             |              |              |     |
|----------------|----|-------------|--------------------|----|-------------|--------------------|-------------|--------------|--------------|-----|
| psc.yrs.dur    | >= | 1.861738535 | ALB.resultn        | <  | 3.35        | Missing            | 0.002534779 | 895          |              |     |
| psc.yrs.dur    | >= | 1.861738535 | ALB.resultn        | >= | 3.35        | psc.yrs.dur        | =           | Missing      | 0.000648928  | 895 |
| psc.yrs.dur    | >= | 1.861738535 | ALB.resultn        | >= | 3.35        | psc.yrs.dur        | <           | 2.955509925  | 0.003958464  | 895 |
| psc.yrs.dur    | >= | 1.861738535 | ALB.resultn        | >= | 3.35        | psc.yrs.dur        | >=          | 2.955509925  | 0            | 895 |
| ALK.times.uln  | =  | Missing     | ALB.resultn        | =  | Missing     |                    |             | -0.001720031 | 896          |     |
| ALK.times.uln  | =  | Missing     | ALB.resultn        | <  | 3.95        |                    |             | 0.002700314  | 896          |     |
| ALK.times.uln  | =  | Missing     | ALB.resultn        | >= | 3.95        |                    |             | -0.001344301 | 896          |     |
| ALK.times.uln  | <  | 6.115825908 | TBILL.resultn      | =  | Missing     |                    |             | -0.001219448 | 896          |     |
| ALK.times.uln  | <  | 6.115825908 | TBILL.resultn      | <  | 1.65        |                    |             | -0.001385736 | 896          |     |
| ALK.times.uln  | <  | 6.115825908 | TBILL.resultn      | >= | 1.65        |                    |             | 0            | 896          |     |
| ALK.times.uln  | >= | 6.115825908 |                    |    |             |                    |             | 0.000614306  | 896          |     |
| Sodium.resultn | =  | Missing     |                    |    |             |                    |             | -0.002178938 | 897          |     |
| Sodium.resultn | <  | 137.5       | AST.resultn        | =  | Missing     |                    |             | 0.000293664  | 897          |     |
| Sodium.resultn | <  | 137.5       | AST.resultn        | <  | 67          |                    |             | 0.002735512  | 897          |     |
| Sodium.resultn | <  | 137.5       | AST.resultn        | >= | 67          |                    |             | -0.001334234 | 897          |     |
| Sodium.resultn | >= | 137.5       | AST.resultn        | =  | Missing     |                    |             | -0.001533764 | 897          |     |
| Sodium.resultn | >= | 137.5       | AST.resultn        | <  | 173         |                    |             | -0.00167578  | 897          |     |
| Sodium.resultn | >= | 137.5       | AST.resultn        | >= | 173         |                    |             | 0            | 897          |     |
| ALB.resultn    | =  | Missing     |                    |    |             | Missing            |             | -0.00098319  | 898          |     |
| ALB.resultn    | <  | 3.62        | Hemoglobin.resultn | =  | Missing     | Missing            |             | -0.000148547 | 898          |     |
| ALB.resultn    | <  | 3.62        | Hemoglobin.resultn | <  | 13.45       | Sodium.resultn     | =           | Missing      | 0.001132613  | 898 |
| ALB.resultn    | <  | 3.62        | Hemoglobin.resultn | <  | 13.45       | Sodium.resultn     | <           | 138.5        | 0.00235961   | 898 |
| ALB.resultn    | <  | 3.62        | Hemoglobin.resultn | <  | 13.45       | Sodium.resultn     | >=          | 138.5        | 0            | 898 |
| ALB.resultn    | <  | 3.62        | Hemoglobin.resultn | >= | 13.45       |                    |             | Missing      | -0.002426164 | 898 |
| ALB.resultn    | >= | 3.62        |                    |    |             | Missing            |             | Missing      | -0.001990459 | 898 |
| AST.resultn    | =  | Missing     |                    |    |             | Missing            |             | Missing      | -0.005669729 | 899 |
| AST.resultn    | <  | 56.5        |                    |    |             | Missing            |             | Missing      | -0.006451883 | 899 |
| AST.resultn    | >= | 56.5        | age.yrs            | =  | Missing     | Missing            |             | Missing      | -0.004893935 | 899 |
| AST.resultn    | >= | 56.5        | age.yrs            | <  | 53.28405202 | Missing            |             | Missing      | -0.005585337 | 899 |
| AST.resultn    | >= | 56.5        | age.yrs            | >= | 53.28405202 | psc.yrs.dur        | =           | Missing      | -0.002927759 | 899 |
| AST.resultn    | >= | 56.5        | age.yrs            | >= | 53.28405202 | psc.yrs.dur        | <           | 0.741957563  | -0.005855518 | 899 |
| AST.resultn    | >= | 56.5        | age.yrs            | >= | 53.28405202 | psc.yrs.dur        | >=          | 0.741957563  | 0            | 899 |
| TBILL.resultn  | =  | Missing     |                    |    |             |                    |             | -0.001163558 | 900          |     |
| TBILL.resultn  | <  | 2.05        | age.yrs            | =  | Missing     |                    |             | -0.00339348  | 900          |     |
| TBILL.resultn  | <  | 2.05        | age.yrs            | <  | 70.88295688 |                    |             | -0.003559827 | 900          |     |
| TBILL.resultn  | <  | 2.05        | age.yrs            | >= | 70.88295688 |                    |             | 0            | 900          |     |
| TBILL.resultn  | >= | 2.05        | PLT.resultn        | =  | Missing     |                    |             | -0.001989192 | 900          |     |
| TBILL.resultn  | >= | 2.05        | PLT.resultn        | <  | 249.5       |                    |             | -0.000767112 | 900          |     |
| TBILL.resultn  | >= | 2.05        | PLT.resultn        | >= | 249.5       |                    |             | -0.002736019 | 900          |     |
| ALB.resultn    | =  | Missing     |                    |    |             | Missing            |             | -0.003033116 | 901          |     |
| ALB.resultn    | <  | 3.225       |                    |    |             | Missing            |             | -0.00184322  | 901          |     |
| ALB.resultn    | >= | 3.225       | age.yrs            | =  | Missing     | Missing            |             | -0.003272459 | 901          |     |
| ALB.resultn    | >= | 3.225       | age.yrs            | <  | 54.91991786 | Missing            |             | -0.003607519 | 901          |     |
| ALB.resultn    | >= | 3.225       | age.yrs            | >= | 54.91991786 | TBILL.resultn      | =           | Missing      | -0.00212069  | 901 |
| ALB.resultn    | >= | 3.225       | age.yrs            | >= | 54.91991786 | TBILL.resultn      | <           | 1.35         | -0.00269385  | 901 |
| ALB.resultn    | >= | 3.225       | age.yrs            | >= | 54.91991786 | TBILL.resultn      | >=          | 1.35         | 0            | 901 |
| TBILL.resultn  | =  | Missing     |                    |    |             | Missing            |             | -7.19E-05    | 902          |     |
| TBILL.resultn  | <  | 0.95        |                    |    |             | Missing            |             | -0.000805277 | 902          |     |
| TBILL.resultn  | >= | 0.95        | Hemoglobin.resultn | =  | Missing     | Missing            |             | 0.002205019  | 902          |     |
| TBILL.resultn  | >= | 0.95        | Hemoglobin.resultn | <  | 13.35       | PLT.resultn        | =           | Missing      | 0.001907455  | 902 |
| TBILL.resultn  | >= | 0.95        | Hemoglobin.resultn | <  | 13.35       | PLT.resultn        | <           | 274.5        | 0.003497002  | 902 |
| TBILL.resultn  | >= | 0.95        | Hemoglobin.resultn | <  | 13.35       | PLT.resultn        | >=          | 274.5        | 0            | 902 |
| TBILL.resultn  | >= | 0.95        | Hemoglobin.resultn | >= | 13.35       |                    |             | Missing      | -0.000655757 | 902 |
| ALB.resultn    | =  | Missing     |                    |    |             | Missing            |             | -0.002659636 | 903          |     |
| ALB.resultn    | <  | 2.95        |                    |    |             | Missing            |             | -0.000654287 | 903          |     |
| ALB.resultn    | >= | 2.95        | TBILL.resultn      | =  | Missing     | Missing            |             | -0.002691604 | 903          |     |
| ALB.resultn    | >= | 2.95        | TBILL.resultn      | <  | 0.75        | Missing            |             | -0.003248091 | 903          |     |
| ALB.resultn    | >= | 2.95        | TBILL.resultn      | >= | 0.75        | Hemoglobin.resultn | =           | Missing      | 0            | 903 |
| ALB.resultn    | >= | 2.95        | TBILL.resultn      | >= | 0.75        | Hemoglobin.resultn | <           | 14.15        | -0.001892423 | 903 |
| ALB.resultn    | >= | 2.95        | TBILL.resultn      | >= | 0.75        | Hemoglobin.resultn | >=          | 14.15        | -0.003251389 | 903 |
| ALB.resultn    | =  | Missing     |                    |    |             | Missing            |             | -0.001753035 | 904          |     |
| ALB.resultn    | <  | 3.08        |                    |    |             | Missing            |             | 0.000135748  | 904          |     |

|                |    |                         |             |                         |             |              |              |     |
|----------------|----|-------------------------|-------------|-------------------------|-------------|--------------|--------------|-----|
| ALB.resultn    | >= | 3.08 age.yrs            | =           | Missing                 | Missing     | -0.001764038 | 904          |     |
| ALB.resultn    | >= | 3.08 age.yrs            | <           | 51.58521561             | Missing     | -0.002030944 | 904          |     |
| ALB.resultn    | >= | 3.08 age.yrs            | >=          | 51.58521561 AST.resultn | =           | Missing      | -0.001226467 | 904 |
| ALB.resultn    | >= | 3.08 age.yrs            | >=          | 51.58521561 AST.resultn | <           | 51           | -0.002320343 | 904 |
| ALB.resultn    | >= | 3.08 age.yrs            | >=          | 51.58521561 AST.resultn | >=          | 51           | 0            | 904 |
| ALB.resultn    | =  | Missing                 |             |                         | Missing     | -0.00445943  | 905          |     |
| ALB.resultn    | <  | 3.05                    |             |                         | Missing     | -0.002293387 | 905          |     |
| ALB.resultn    | >= | 3.05 psc.yrs.dur        | =           | Missing                 | Missing     | -0.004206252 | 905          |     |
| ALB.resultn    | >= | 3.05 psc.yrs.dur        | <           | 6.410677618             | Missing     | -0.004436069 | 905          |     |
| ALB.resultn    | >= | 3.05 psc.yrs.dur        | >=          | 6.410677618 AST.resultn | =           | Missing      | -0.002748105 | 905 |
| ALB.resultn    | >= | 3.05 psc.yrs.dur        | >=          | 6.410677618 AST.resultn | <           | 47           | -0.004980939 | 905 |
| ALB.resultn    | >= | 3.05 psc.yrs.dur        | >=          | 6.410677618 AST.resultn | >=          | 47           | 0            | 905 |
| psc.yrs.dur    | =  | Missing                 |             |                         | Missing     | 1.92E-05     | 906          |     |
| psc.yrs.dur    | <  | 1.385352498             |             |                         | Missing     | -0.000340278 | 906          |     |
| psc.yrs.dur    | >= | 1.385352498 ALB.resultn | =           | Missing                 | Missing     | 0.000773199  | 906          |     |
| psc.yrs.dur    | >= | 1.385352498 ALB.resultn | <           | 3.345                   | Missing     | 0.001644367  | 906          |     |
| psc.yrs.dur    | >= | 1.385352498 ALB.resultn | >=          | 3.345 psc.yrs.dur       | =           | Missing      | 0.000584446  | 906 |
| psc.yrs.dur    | >= | 1.385352498 ALB.resultn | >=          | 3.345 psc.yrs.dur       | <           | 2.911704312  | 0.003187888  | 906 |
| psc.yrs.dur    | >= | 1.385352498 ALB.resultn | >=          | 3.345 psc.yrs.dur       | >=          | 2.911704312  | 0            | 906 |
| age.yrs        | =  | Missing                 |             |                         | Missing     | 0.000772511  | 907          |     |
| age.yrs        | <  | 49.10198494             |             |                         | Missing     | 0.000218385  | 907          |     |
| age.yrs        | >= | 49.10198494 AST.resultn | =           | Missing                 | Missing     | 0.001684511  | 907          |     |
| age.yrs        | >= | 49.10198494 AST.resultn | <           | 98.5 Sodium.resultn     | =           | Missing      | 0            | 907 |
| age.yrs        | >= | 49.10198494 AST.resultn | <           | 98.5 Sodium.resultn     | <           | 137.5        | 0.004610873  | 907 |
| age.yrs        | >= | 49.10198494 AST.resultn | <           | 98.5 Sodium.resultn     | >=          | 137.5        | 0.000864684  | 907 |
| age.yrs        | >= | 49.10198494 AST.resultn | >=          | 98.5                    | Missing     | 0.004331164  | 907          |     |
| age.yrs        | =  | Missing                 |             |                         | Missing     | -0.004243402 | 908          |     |
| age.yrs        | <  | 51.58521561             |             |                         | Missing     | -0.004471991 | 908          |     |
| age.yrs        | >= | 51.58521561 AST.resultn | =           | Missing                 | Missing     | -0.00375518  | 908          |     |
| age.yrs        | >= | 51.58521561 AST.resultn | <           | 50                      | Missing     | -0.00492123  | 908          |     |
| age.yrs        | >= | 51.58521561 AST.resultn | >=          | 50 psc.yrs.dur          | =           | Missing      | -0.002558445 | 908 |
| age.yrs        | >= | 51.58521561 AST.resultn | >=          | 50 psc.yrs.dur          | <           | 0.73100616   | -0.003888836 | 908 |
| age.yrs        | >= | 51.58521561 AST.resultn | >=          | 50 psc.yrs.dur          | >=          | 0.73100616   | 0            | 908 |
| TBILL.resultn  | =  | Missing                 |             |                         |             | -0.003232019 | 909          |     |
| TBILL.resultn  | <  | 2.05 age.yrs            | =           | Missing                 |             | -0.002435961 | 909          |     |
| TBILL.resultn  | <  | 2.05 age.yrs            | <           | 69.76043806             |             | -0.002565408 | 909          |     |
| TBILL.resultn  | <  | 2.05 age.yrs            | >=          | 69.76043806             |             | 0            | 909          |     |
| TBILL.resultn  | >= | 2.05 age.yrs            | =           | Missing                 |             | -0.00122424  | 909          |     |
| TBILL.resultn  | >= | 2.05 age.yrs            | <           | 48.99247091             |             | -0.002062919 | 909          |     |
| TBILL.resultn  | >= | 2.05 age.yrs            | >=          | 48.99247091             |             | -0.000301693 | 909          |     |
| ALK.times.uln  | =  | Missing                 | ALB.resultn | =                       | Missing     | 0            | 910          |     |
| ALK.times.uln  | =  | Missing                 | ALB.resultn | <                       | 3.95        | 0.002153458  | 910          |     |
| ALK.times.uln  | =  | Missing                 | ALB.resultn | >=                      | 3.95        | 3.43E-05     | 910          |     |
| ALK.times.uln  | <  | 6.02 Sodium.resultn     | =           | Missing                 |             | 0.000228013  | 910          |     |
| ALK.times.uln  | <  | 6.02 Sodium.resultn     | <           | 136.5                   |             | 0.003151236  | 910          |     |
| ALK.times.uln  | <  | 6.02 Sodium.resultn     | >=          | 136.5                   |             | 0.000660488  | 910          |     |
| ALK.times.uln  | >= | 6.02                    |             |                         |             | 0.002872311  | 910          |     |
| TBILL.resultn  | =  | Missing                 |             |                         |             | -0.0006354   | 911          |     |
| TBILL.resultn  | <  | 1.95 TBILL.resultn      | =           | Missing                 |             | -0.000727421 | 911          |     |
| TBILL.resultn  | <  | 1.95 TBILL.resultn      | <           | 0.75                    |             | -0.001320997 | 911          |     |
| TBILL.resultn  | <  | 1.95 TBILL.resultn      | >=          | 0.75                    |             | 0            | 911          |     |
| TBILL.resultn  | >= | 1.95 PLT.resultn        | =           | Missing                 |             | 0.000314096  | 911          |     |
| TBILL.resultn  | >= | 1.95 PLT.resultn        | <           | 220                     |             | 0.000888704  | 911          |     |
| TBILL.resultn  | >= | 1.95 PLT.resultn        | >=          | 220                     |             | -0.000375434 | 911          |     |
| ALB.resultn    | =  | Missing                 | psc.yrs.dur | =                       | Missing     | 0.00150649   | 912          |     |
| ALB.resultn    | =  | Missing                 | psc.yrs.dur | <                       | 0.154688569 | 0.003766225  | 912          |     |
| ALB.resultn    | =  | Missing                 | psc.yrs.dur | >=                      | 0.154688569 | 0            | 912          |     |
| ALB.resultn    | <  | 3.05                    |             |                         |             | 0.002596816  | 912          |     |
| ALB.resultn    | >= | 3.05 PLT.resultn        | =           | Missing                 |             | -7.68E-05    | 912          |     |
| ALB.resultn    | >= | 3.05 PLT.resultn        | <           | 185.5                   |             | 0.002519237  | 912          |     |
| ALB.resultn    | >= | 3.05 PLT.resultn        | >=          | 185.5                   |             | 0.000483988  | 912          |     |
| Sodium.resultn | =  | Missing                 |             |                         | Missing     | -0.001991204 | 913          |     |



|                |    |             |                |    |             |               |              |             |              |     |
|----------------|----|-------------|----------------|----|-------------|---------------|--------------|-------------|--------------|-----|
| Sodium.resultn | <  | 136.5       |                |    |             | Missing       | 0.000937157  | 913         |              |     |
| Sodium.resultn | >= | 136.5       | PLT.resultn    | =  | Missing     | Missing       | -0.001797957 | 913         |              |     |
| Sodium.resultn | >= | 136.5       | PLT.resultn    | <  | 249.5       | TBILI.resultn | =            | Missing     | -0.001147891 | 913 |
| Sodium.resultn | >= | 136.5       | PLT.resultn    | <  | 249.5       | TBILI.resultn | <            | 1.65        | -0.001395475 | 913 |
| Sodium.resultn | >= | 136.5       | PLT.resultn    | <  | 249.5       | TBILI.resultn | >=           | 1.65        | 0            | 913 |
| Sodium.resultn | >= | 136.5       | PLT.resultn    | >= | 249.5       | Missing       |              |             | -0.00228947  | 913 |
| TBILI.resultn  | =  | Missing     |                |    |             |               |              |             | 0.004050523  | 914 |
| TBILI.resultn  | <  | 1.65        | ALK.times.uln  | =  | Missing     |               |              |             | 0            | 914 |
| TBILI.resultn  | <  | 1.65        | ALK.times.uln  | <  | 5.990825908 |               |              |             | -0.0004456   | 914 |
| TBILI.resultn  | <  | 1.65        | ALK.times.uln  | >= | 5.990825908 |               |              |             | 0.002030897  | 914 |
| TBILI.resultn  | >= | 1.65        | ALK.times.uln  | =  | Missing     |               |              |             | 0.001221034  | 914 |
| TBILI.resultn  | >= | 1.65        | ALK.times.uln  | <  | 3.499861424 |               |              |             | 0.002432401  | 914 |
| TBILI.resultn  | >= | 1.65        | ALK.times.uln  | >= | 3.499861424 |               |              |             | 0.00018272   | 914 |
| ALB.resultn    | =  | Missing     |                |    |             | Missing       |              |             | -0.000898835 | 915 |
| ALB.resultn    | <  | 2.915       |                |    |             | Missing       |              |             | 0.00139216   | 915 |
| ALB.resultn    | >= | 2.915       | PLT.resultn    | =  | Missing     | Missing       |              |             | -0.000142421 | 915 |
| ALB.resultn    | >= | 2.915       | PLT.resultn    | <  | 246         | ALK.times.uln | =            | Missing     | 0            | 915 |
| ALB.resultn    | >= | 2.915       | PLT.resultn    | <  | 246         | ALK.times.uln | <            | 2.85059761  | -0.001567464 | 915 |
| ALB.resultn    | >= | 2.915       | PLT.resultn    | <  | 246         | ALK.times.uln | >=           | 2.85059761  | 0.002370331  | 915 |
| ALB.resultn    | >= | 2.915       | PLT.resultn    | >= | 246         | Missing       |              |             | -0.001551192 | 915 |
| psc.yrs.dur    | =  | Missing     |                |    |             | Missing       |              |             | -0.002796147 | 916 |
| psc.yrs.dur    | <  | 1.961670089 |                |    |             | Missing       |              |             | -0.003057765 | 916 |
| psc.yrs.dur    | >= | 1.961670089 | AST.resultn    | =  | Missing     | Missing       |              |             | -0.00229396  | 916 |
| psc.yrs.dur    | >= | 1.961670089 | AST.resultn    | <  | 58.5        | Missing       |              |             | -0.00352324  | 916 |
| psc.yrs.dur    | >= | 1.961670089 | AST.resultn    | >= | 58.5        | age.yrs       | =            | Missing     | -0.001204371 | 916 |
| psc.yrs.dur    | >= | 1.961670089 | AST.resultn    | >= | 58.5        | age.yrs       | <            | 48.73511294 | -0.002523444 | 916 |
| psc.yrs.dur    | >= | 1.961670089 | AST.resultn    | >= | 58.5        | age.yrs       | >=           | 48.73511294 | 0            | 916 |
| age.yrs        | =  | Missing     |                |    |             | Missing       |              |             | -0.001008461 | 917 |
| age.yrs        | <  | 55.97809719 |                |    |             | Missing       |              |             | -0.001468956 | 917 |
| age.yrs        | >= | 55.97809719 | AST.resultn    | =  | Missing     | Missing       |              |             | 0.001073776  | 917 |
| age.yrs        | >= | 55.97809719 | AST.resultn    | <  | 51          | Missing       |              |             | -0.002138704 | 917 |
| age.yrs        | >= | 55.97809719 | AST.resultn    | >= | 51          | AST.resultn   | =            | Missing     | 0.004006911  | 917 |
| age.yrs        | >= | 55.97809719 | AST.resultn    | >= | 51          | AST.resultn   | <            | 67          | 0.009215894  | 917 |
| age.yrs        | >= | 55.97809719 | AST.resultn    | >= | 51          | AST.resultn   | >=           | 67          | 0            | 917 |
| PLT.resultn    | =  | Missing     |                |    |             |               |              |             | 0.000392503  | 918 |
| PLT.resultn    | <  | 204.5       | TBILI.resultn  | =  | Missing     |               |              |             | 0.001352623  | 918 |
| PLT.resultn    | <  | 204.5       | TBILI.resultn  | <  | 1.5         |               |              |             | -0.000207135 | 918 |
| PLT.resultn    | <  | 204.5       | TBILI.resultn  | >= | 1.5         |               |              |             | 0.004160189  | 918 |
| PLT.resultn    | >= | 204.5       | ALK.times.uln  | =  | Missing     |               |              |             | 0            | 918 |
| PLT.resultn    | >= | 204.5       | ALK.times.uln  | <  | 5.446215139 |               |              |             | -0.000462136 | 918 |
| PLT.resultn    | >= | 204.5       | ALK.times.uln  | >= | 5.446215139 |               |              |             | 0.000979694  | 918 |
| psc.yrs.dur    | =  | Missing     |                |    |             |               |              |             | 0.000359901  | 919 |
| psc.yrs.dur    | <  | 6.379192334 | psc.yrs.dur    | =  | Missing     |               |              |             | 0.000167326  | 919 |
| psc.yrs.dur    | <  | 6.379192334 | psc.yrs.dur    | <  | 0.004106776 |               |              |             | 0.001182079  | 919 |
| psc.yrs.dur    | <  | 6.379192334 | psc.yrs.dur    | >= | 0.004106776 |               |              |             | 0            | 919 |
| psc.yrs.dur    | >= | 6.379192334 | ALB.resultn    | =  | Missing     |               |              |             | 0.00156487   | 919 |
| psc.yrs.dur    | >= | 6.379192334 | ALB.resultn    | <  | 3.465       |               |              |             | 0.00357221   | 919 |
| psc.yrs.dur    | >= | 6.379192334 | ALB.resultn    | >= | 3.465       |               |              |             | 0.000652442  | 919 |
| TBILI.resultn  | =  | Missing     |                |    |             |               |              |             | -0.000698218 | 920 |
| TBILI.resultn  | <  | 2.35        | Sodium.resultn | =  | Missing     |               |              |             | 0            | 920 |
| TBILI.resultn  | <  | 2.35        | Sodium.resultn | <  | 136.5       |               |              |             | 0.001668086  | 920 |
| TBILI.resultn  | <  | 2.35        | Sodium.resultn | >= | 136.5       |               |              |             | -0.000228719 | 920 |
| TBILI.resultn  | >= | 2.35        | age.yrs        | =  | Missing     |               |              |             | 0.001428774  | 920 |
| TBILI.resultn  | >= | 2.35        | age.yrs        | <  | 51.10746064 |               |              |             | 7.02E-05     | 920 |
| TBILI.resultn  | >= | 2.35        | age.yrs        | >= | 51.10746064 |               |              |             | 0.003059008  | 920 |
| TBILI.resultn  | =  | Missing     |                |    |             |               |              |             | 0.000554252  | 921 |
| TBILI.resultn  | <  | 1.95        | Sodium.resultn | =  | Missing     |               |              |             | 0            | 921 |
| TBILI.resultn  | <  | 1.95        | Sodium.resultn | <  | 137.5       |               |              |             | 0.001965861  | 921 |
| TBILI.resultn  | <  | 1.95        | Sodium.resultn | >= | 137.5       |               |              |             | 0.000467555  | 921 |
| TBILI.resultn  | >= | 1.95        | ALB.resultn    | =  | Missing     |               |              |             | 0.001423932  | 921 |
| TBILI.resultn  | >= | 1.95        | ALB.resultn    | <  | 3.545       |               |              |             | 0.002711819  | 921 |
| TBILI.resultn  | >= | 1.95        | ALB.resultn    | >= | 3.545       |               |              |             | 0.00056534   | 921 |

|                |    |             |               |    |             |             |    |              |              |     |
|----------------|----|-------------|---------------|----|-------------|-------------|----|--------------|--------------|-----|
| ALK.times.uln  | =  | Missing     | age.yrs       | =  | Missing     |             |    | -0.000439764 | 922          |     |
| ALK.times.uln  | =  | Missing     | age.yrs       | <  | 53.35934292 |             |    | -0.001282713 | 922          |     |
| ALK.times.uln  | =  | Missing     | age.yrs       | >= | 53.35934292 |             |    | 0.001543646  | 922          |     |
| ALK.times.uln  | <  | 5.462893197 |               |    |             |             |    | -0.00082277  | 922          |     |
| ALK.times.uln  | >= | 5.462893197 | AST.resultn   | =  | Missing     |             |    | 0.000878974  | 922          |     |
| ALK.times.uln  | >= | 5.462893197 | AST.resultn   | <  | 138         |             |    | 0.001837854  | 922          |     |
| ALK.times.uln  | >= | 5.462893197 | AST.resultn   | >= | 138         |             |    | 0            | 922          |     |
| TBILI.resultn  | =  | Missing     |               |    |             |             |    | 0.003099112  | 923          |     |
| TBILI.resultn  | <  | 2.05        | PLT.resultn   | =  | Missing     |             |    | 0            | 923          |     |
| TBILI.resultn  | <  | 2.05        | PLT.resultn   | <  | 186.5       |             |    | 0.002150821  | 923          |     |
| TBILI.resultn  | <  | 2.05        | PLT.resultn   | >= | 186.5       |             |    | -0.000426533 | 923          |     |
| TBILI.resultn  | >= | 2.05        | PLT.resultn   | =  | Missing     |             |    | 0.000977654  | 923          |     |
| TBILI.resultn  | >= | 2.05        | PLT.resultn   | <  | 217.5       |             |    | 0.001758491  | 923          |     |
| TBILI.resultn  | >= | 2.05        | PLT.resultn   | >= | 217.5       |             |    | 0.000489631  | 923          |     |
| ALB.resultn    | =  | Missing     |               |    |             | Missing     |    | -0.003896812 | 924          |     |
| ALB.resultn    | <  | 3.105       |               |    |             | Missing     |    | -0.001911127 | 924          |     |
| ALB.resultn    | >= | 3.105       | age.yrs       | =  | Missing     | Missing     |    | -0.003802785 | 924          |     |
| ALB.resultn    | >= | 3.105       | age.yrs       | <  | 63.52635181 | Missing     |    | -0.00401169  | 924          |     |
| ALB.resultn    | >= | 3.105       | age.yrs       | >= | 63.52635181 | AST.resultn | =  | Missing      | -0.002316349 | 924 |
| ALB.resultn    | >= | 3.105       | age.yrs       | >= | 63.52635181 | AST.resultn | <  | 51           | -0.004454517 | 924 |
| ALB.resultn    | >= | 3.105       | age.yrs       | >= | 63.52635181 | AST.resultn | >= | 51           | 0            | 924 |
| age.yrs        | =  | Missing     |               |    |             | Missing     |    | 0.000777951  | 925          |     |
| age.yrs        | <  | 67.8110883  | PLT.resultn   | =  | Missing     | Missing     |    | 0.000474301  | 925          |     |
| age.yrs        | <  | 67.8110883  | PLT.resultn   | <  | 198.5       | ALB.resultn | =  | Missing      | 0.001454767  | 925 |
| age.yrs        | <  | 67.8110883  | PLT.resultn   | <  | 198.5       | ALB.resultn | <  | 3.82         | 0.004496551  | 925 |
| age.yrs        | <  | 67.8110883  | PLT.resultn   | <  | 198.5       | ALB.resultn | >= | 3.82         | 0            | 925 |
| age.yrs        | <  | 67.8110883  | PLT.resultn   | >= | 198.5       | Missing     |    | 0.000426951  | 925          |     |
| age.yrs        | >= | 67.8110883  |               |    |             | Missing     |    | 0.005607692  | 925          |     |
| Sodium.resultn | =  | Missing     |               |    |             |             |    | 0.000311079  | 926          |     |
| Sodium.resultn | <  | 138.5       | ALK.times.uln | =  | Missing     |             |    | 0.000791974  | 926          |     |
| Sodium.resultn | <  | 138.5       | ALK.times.uln | <  | 2.795652174 |             |    | 0.000607078  | 926          |     |
| Sodium.resultn | <  | 138.5       | ALK.times.uln | >= | 2.795652174 |             |    | 0.002461858  | 926          |     |
| Sodium.resultn | >= | 138.5       | psc.yrs.dur   | =  | Missing     |             |    | 0.000194552  | 926          |     |
| Sodium.resultn | >= | 138.5       | psc.yrs.dur   | <  | 0.001368925 |             |    | 0.00203395   | 926          |     |
| Sodium.resultn | >= | 138.5       | psc.yrs.dur   | >= | 0.001368925 |             |    | 0            | 926          |     |
| TBILI.resultn  | =  | Missing     |               |    |             |             |    | 0.000246864  | 927          |     |
| TBILI.resultn  | <  | 2.75        | TBILI.resultn | =  | Missing     |             |    | -0.000854696 | 927          |     |
| TBILI.resultn  | <  | 2.75        | TBILI.resultn | <  | 0.95        |             |    | -0.001239593 | 927          |     |
| TBILI.resultn  | <  | 2.75        | TBILI.resultn | >= | 0.95        |             |    | 0            | 927          |     |
| TBILI.resultn  | >= | 2.75        | psc.yrs.dur   | =  | Missing     |             |    | 0.000148963  | 927          |     |
| TBILI.resultn  | >= | 2.75        | psc.yrs.dur   | <  | 1.741273101 |             |    | -0.000816419 | 927          |     |
| TBILI.resultn  | >= | 2.75        | psc.yrs.dur   | >= | 1.741273101 |             |    | 0.001114344  | 927          |     |
| psc.yrs.dur    | =  | Missing     |               |    |             | Missing     |    | 0.000227218  | 928          |     |
| psc.yrs.dur    | <  | 1.385352498 |               |    |             | Missing     |    | -0.000130235 | 928          |     |
| psc.yrs.dur    | >= | 1.385352498 | ALK.times.uln | =  | Missing     | Missing     |    | 0.001083564  | 928          |     |
| psc.yrs.dur    | >= | 1.385352498 | ALK.times.uln | <  | 2.781735492 | Missing     |    | -0.000338335 | 928          |     |
| psc.yrs.dur    | >= | 1.385352498 | ALK.times.uln | >= | 2.781735492 | PLT.resultn | =  | Missing      | 0.002115032  | 928 |
| psc.yrs.dur    | >= | 1.385352498 | ALK.times.uln | >= | 2.781735492 | PLT.resultn | <  | 320.5        | 0.003569116  | 928 |
| psc.yrs.dur    | >= | 1.385352498 | ALK.times.uln | >= | 2.781735492 | PLT.resultn | >= | 320.5        | 0            | 928 |
| ALK.times.uln  | =  | Missing     |               |    |             | Missing     |    | -0.003108508 | 929          |     |
| ALK.times.uln  | <  | 5.446215139 | TBILI.resultn | =  | Missing     | Missing     |    | -0.002949795 | 929          |     |
| ALK.times.uln  | <  | 5.446215139 | TBILI.resultn | <  | 0.75        | Missing     |    | -0.003638249 | 929          |     |
| ALK.times.uln  | <  | 5.446215139 | TBILI.resultn | >= | 0.75        | psc.yrs.dur | =  | Missing      | -0.002252945 | 929 |
| ALK.times.uln  | <  | 5.446215139 | TBILI.resultn | >= | 0.75        | psc.yrs.dur | <  | 1.92881588   | -0.003358937 | 929 |
| ALK.times.uln  | <  | 5.446215139 | TBILI.resultn | >= | 0.75        | psc.yrs.dur | >= | 1.92881588   | 0            | 929 |
| ALK.times.uln  | >= | 5.446215139 |               |    |             | Missing     |    | -0.001630966 | 929          |     |
| TBILI.resultn  | =  | Missing     |               |    |             | Missing     |    | -0.001851713 | 930          |     |
| TBILI.resultn  | <  | 2.85        | AST.resultn   | =  | Missing     | Missing     |    | -0.002165609 | 930          |     |
| TBILI.resultn  | <  | 2.85        | AST.resultn   | <  | 57.5        | Missing     |    | -0.002679854 | 930          |     |
| TBILI.resultn  | <  | 2.85        | AST.resultn   | >= | 57.5        | age.yrs     | =  | Missing      | -0.001606862 | 930 |
| TBILI.resultn  | <  | 2.85        | AST.resultn   | >= | 57.5        | age.yrs     | <  | 51.92060233  | -0.00208892  | 930 |
| TBILI.resultn  | <  | 2.85        | AST.resultn   | >= | 57.5        | age.yrs     | >= | 51.92060233  | 0            | 930 |

|               |    |                         |    |                            |    |             |              |     |
|---------------|----|-------------------------|----|----------------------------|----|-------------|--------------|-----|
| TBILL.resultn | >= | 2.85                    |    |                            |    | Missing     | -0.000858824 | 930 |
| ALK.times.uln | =  | Missing                 |    |                            |    | Missing     | -0.006550906 | 931 |
| ALK.times.uln | <  | 6.02 Sodium.resultn     | =  | Missing                    |    | Missing     | -0.007593109 | 931 |
| ALK.times.uln | <  | 6.02 Sodium.resultn     | <  | 138.5 age.yrs              | =  | Missing     | -0.00430527  | 931 |
| ALK.times.uln | <  | 6.02 Sodium.resultn     | <  | 138.5 age.yrs              | <  | 47.41136208 | -0.007597535 | 931 |
| ALK.times.uln | <  | 6.02 Sodium.resultn     | <  | 138.5 age.yrs              | >= | 47.41136208 | 0            | 931 |
| ALK.times.uln | <  | 6.02 Sodium.resultn     | >= | 138.5                      |    | Missing     | -0.007552025 | 931 |
| ALK.times.uln | >= | 6.02                    |    |                            |    | Missing     | -0.005384662 | 931 |
| ALK.times.uln | =  | Missing age.yrs         | =  | Missing                    |    |             | -0.005539721 | 932 |
| ALK.times.uln | =  | Missing age.yrs         | <  | 53.46475017                |    |             | -0.006084654 | 932 |
| ALK.times.uln | =  | Missing age.yrs         | >= | 53.46475017                |    |             | -0.004193414 | 932 |
| ALK.times.uln | <  | 6.115825908 age.yrs     | =  | Missing                    |    |             | -0.005358427 | 932 |
| ALK.times.uln | <  | 6.115825908 age.yrs     | <  | 67.67419576                |    |             | -0.005677381 | 932 |
| ALK.times.uln | <  | 6.115825908 age.yrs     | >= | 67.67419576                |    |             | 0            | 932 |
| ALK.times.uln | >= | 6.115825908             |    |                            |    |             | -0.003942179 | 932 |
| TBILL.resultn | =  | Missing                 |    |                            |    |             | -0.001681926 | 933 |
| TBILL.resultn | <  | 1.95 age.yrs            | =  | Missing                    |    |             | -0.00180822  | 933 |
| TBILL.resultn | <  | 1.95 age.yrs            | <  | 60.31622177                |    |             | -0.002112865 | 933 |
| TBILL.resultn | <  | 1.95 age.yrs            | >= | 60.31622177                |    |             | 0            | 933 |
| TBILL.resultn | >= | 1.95 Hemoglobin.resultn | =  | Missing                    |    |             | -0.000776819 | 933 |
| TBILL.resultn | >= | 1.95 Hemoglobin.resultn | <  | 13.15                      |    |             | 0.000567388  | 933 |
| TBILL.resultn | >= | 1.95 Hemoglobin.resultn | >= | 13.15                      |    |             | -0.001672957 | 933 |
| TBILL.resultn | =  | Missing                 |    |                            |    |             | 0.001585298  | 934 |
| TBILL.resultn | <  | 2.05 Sodium.resultn     | =  | Missing                    |    |             | 0            | 934 |
| TBILL.resultn | <  | 2.05 Sodium.resultn     | <  | 136.5                      |    |             | 0.003779721  | 934 |
| TBILL.resultn | <  | 2.05 Sodium.resultn     | >= | 136.5                      |    |             | 0.000458678  | 934 |
| TBILL.resultn | >= | 2.05 PLT.resultn        | =  | Missing                    |    |             | 0.001867647  | 934 |
| TBILL.resultn | >= | 2.05 PLT.resultn        | <  | 217.5                      |    |             | 0.002529525  | 934 |
| TBILL.resultn | >= | 2.05 PLT.resultn        | >= | 217.5                      |    |             | 0.00126594   | 934 |
| TBILL.resultn | =  | Missing                 |    |                            |    | Missing     | -0.000717033 | 935 |
| TBILL.resultn | <  | 2.25 psc.yrs.dur        | =  | Missing                    |    | Missing     | -7.21E-05    | 935 |
| TBILL.resultn | <  | 2.25 psc.yrs.dur        | <  | 1.916495551                |    | Missing     | -0.000420024 | 935 |
| TBILL.resultn | <  | 2.25 psc.yrs.dur        | >= | 1.916495551 Sodium.resultn | =  | Missing     | 0            | 935 |
| TBILL.resultn | <  | 2.25 psc.yrs.dur        | >= | 1.916495551 Sodium.resultn | <  | 140.5       | 0.002552114  | 935 |
| TBILL.resultn | <  | 2.25 psc.yrs.dur        | >= | 1.916495551 Sodium.resultn | >= | 140.5       | -0.0007079   | 935 |
| TBILL.resultn | >= | 2.25                    |    |                            |    | Missing     | 0.001628777  | 935 |
| psc.yrs.dur   | =  | Missing                 |    |                            |    |             | -0.000472593 | 936 |
| psc.yrs.dur   | <  | 7.823408624 PLT.resultn | =  | Missing                    |    |             | 0            | 936 |
| psc.yrs.dur   | <  | 7.823408624 PLT.resultn | <  | 185.5                      |    |             | 0.001404894  | 936 |
| psc.yrs.dur   | <  | 7.823408624 PLT.resultn | >= | 185.5                      |    |             | -0.000952652 | 936 |
| psc.yrs.dur   | >= | 7.823408624 AST.resultn | =  | Missing                    |    |             | 0.001223783  | 936 |
| psc.yrs.dur   | >= | 7.823408624 AST.resultn | <  | 42.5                       |    |             | -0.001146904 | 936 |
| psc.yrs.dur   | >= | 7.823408624 AST.resultn | >= | 42.5                       |    |             | 0.002917132  | 936 |
| PLT.resultn   | =  | Missing                 |    |                            |    | Missing     | -0.001645317 | 937 |
| PLT.resultn   | <  | 249.5 ALK.times.uln     | =  | Missing TBILL.resultn      | =  | Missing     | -0.000555363 | 937 |
| PLT.resultn   | <  | 249.5 ALK.times.uln     | =  | Missing TBILL.resultn      | <  | 1.05        | -0.000925605 | 937 |
| PLT.resultn   | <  | 249.5 ALK.times.uln     | =  | Missing TBILL.resultn      | >= | 1.05        | 0            | 937 |
| PLT.resultn   | <  | 249.5 ALK.times.uln     | <  | 3.573913043                |    | Missing     | -0.001417543 | 937 |
| PLT.resultn   | <  | 249.5 ALK.times.uln     | >= | 3.573913043                |    | Missing     | 0.000576077  | 937 |
| PLT.resultn   | >= | 249.5                   |    |                            |    | Missing     | -0.001772279 | 937 |
| ALB.resultn   | =  | Missing                 |    |                            |    | Missing     | -0.002311166 | 938 |
| ALB.resultn   | <  | 2.875                   |    |                            |    | Missing     | -0.000491931 | 938 |
| ALB.resultn   | >= | 2.875 AST.resultn       | =  | Missing                    |    | Missing     | -0.00227494  | 938 |
| ALB.resultn   | >= | 2.875 AST.resultn       | <  | 58.5                       |    | Missing     | -0.00287153  | 938 |
| ALB.resultn   | >= | 2.875 AST.resultn       | >= | 58.5 age.yrs               | =  | Missing     | -0.001632895 | 938 |
| ALB.resultn   | >= | 2.875 AST.resultn       | >= | 58.5 age.yrs               | <  | 53.4715948  | -0.002116716 | 938 |
| ALB.resultn   | >= | 2.875 AST.resultn       | >= | 58.5 age.yrs               | >= | 53.4715948  | 0            | 938 |
| PLT.resultn   | =  | Missing                 |    |                            |    | Missing     | -0.001758661 | 939 |
| PLT.resultn   | <  | 249.5 TBILL.resultn     | =  | Missing                    |    | Missing     | -0.000428109 | 939 |
| PLT.resultn   | <  | 249.5 TBILL.resultn     | <  | 1.55 ALK.times.uln         | =  | Missing     | 0            | 939 |
| PLT.resultn   | <  | 249.5 TBILL.resultn     | <  | 1.55 ALK.times.uln         | <  | 2.659996362 | -0.001736478 | 939 |
| PLT.resultn   | <  | 249.5 TBILL.resultn     | <  | 1.55 ALK.times.uln         | >= | 2.659996362 | 0.001724872  | 939 |

|                |    |             |               |    |             |               |              |              |              |     |
|----------------|----|-------------|---------------|----|-------------|---------------|--------------|--------------|--------------|-----|
| PLT.resultn    | <  | 249.5       | TBILL.resultn | >= | 1.55        | Missing       | 0.000794664  | 939          |              |     |
| PLT.resultn    | >= | 249.5       |               |    |             | Missing       | -0.001482911 | 939          |              |     |
| age.yrs        | =  | Missing     |               |    |             | Missing       | -0.003028099 | 940          |              |     |
| age.yrs        | <  | 49.10198494 |               |    |             | Missing       | -0.003404674 | 940          |              |     |
| age.yrs        | >= | 49.10198494 | AST.resultn   | =  | Missing     | Missing       | -0.00237618  | 940          |              |     |
| age.yrs        | >= | 49.10198494 | AST.resultn   | <  | 64          | Missing       | -0.003591332 | 940          |              |     |
| age.yrs        | >= | 49.10198494 | AST.resultn   | >= | 64          | psc.yrs.dur   | =            | Missing      | -0.000987434 | 940 |
| age.yrs        | >= | 49.10198494 | AST.resultn   | >= | 64          | psc.yrs.dur   | <            | 0.465434634  | -0.003190173 | 940 |
| age.yrs        | >= | 49.10198494 | AST.resultn   | >= | 64          | psc.yrs.dur   | >=           | 0.465434634  | 0            | 940 |
| psc.yrs.dur    | =  | Missing     |               |    |             | Missing       | -0.002484356 | 941          |              |     |
| psc.yrs.dur    | <  | 1.994524298 |               |    |             | Missing       | -0.002852976 | 941          |              |     |
| psc.yrs.dur    | >= | 1.994524298 | AST.resultn   | =  | Missing     | Missing       | -0.001738339 | 941          |              |     |
| psc.yrs.dur    | >= | 1.994524298 | AST.resultn   | <  | 88          | Missing       | -0.002093711 | 941          |              |     |
| psc.yrs.dur    | >= | 1.994524298 | AST.resultn   | >= | 88          | age.yrs       | =            | Missing      | -0.000970734 | 941 |
| psc.yrs.dur    | >= | 1.994524298 | AST.resultn   | >= | 88          | age.yrs       | <            | 48.27378508  | -0.002022362 | 941 |
| psc.yrs.dur    | >= | 1.994524298 | AST.resultn   | >= | 88          | age.yrs       | >=           | 48.27378508  | 0            | 941 |
| age.yrs        | =  | Missing     |               |    |             | Missing       | -0.002169725 | 942          |              |     |
| age.yrs        | <  | 51.58521561 |               |    |             | Missing       | -0.002464501 | 942          |              |     |
| age.yrs        | >= | 51.58521561 | TBILL.resultn | =  | Missing     | Missing       | -0.001504589 | 942          |              |     |
| age.yrs        | >= | 51.58521561 | TBILL.resultn | <  | 1.5         | AST.resultn   | =            | Missing      | -0.001771548 | 942 |
| age.yrs        | >= | 51.58521561 | TBILL.resultn | <  | 1.5         | AST.resultn   | <            | 57           | -0.002816307 | 942 |
| age.yrs        | >= | 51.58521561 | TBILL.resultn | <  | 1.5         | AST.resultn   | >=           | 57           | 0            | 942 |
| age.yrs        | >= | 51.58521561 | TBILL.resultn | >= | 1.5         |               | Missing      | -0.000322345 | 942          |     |
| ALB.resultn    | =  | Missing     |               |    |             | Missing       | -0.003365723 | 943          |              |     |
| ALB.resultn    | <  | 2.915       |               |    |             | Missing       | -0.000629972 | 943          |              |     |
| ALB.resultn    | >= | 2.915       | psc.yrs.dur   | =  | Missing     | Missing       | -0.003323286 | 943          |              |     |
| ALB.resultn    | >= | 2.915       | psc.yrs.dur   | <  | 6.783025325 | Missing       | -0.00348717  | 943          |              |     |
| ALB.resultn    | >= | 2.915       | psc.yrs.dur   | >= | 6.783025325 | AST.resultn   | =            | Missing      | -0.002144585 | 943 |
| ALB.resultn    | >= | 2.915       | psc.yrs.dur   | >= | 6.783025325 | AST.resultn   | <            | 47.5         | -0.003982801 | 943 |
| ALB.resultn    | >= | 2.915       | psc.yrs.dur   | >= | 6.783025325 | AST.resultn   | >=           | 47.5         | 0            | 943 |
| ALK.times.uln  | =  | Missing     | TBILL.resultn | =  | Missing     |               | -0.001116423 | 944          |              |     |
| ALK.times.uln  | =  | Missing     | TBILL.resultn | <  | 0.95        |               | -0.001792153 | 944          |              |     |
| ALK.times.uln  | =  | Missing     | TBILL.resultn | >= | 0.95        |               | 0            | 944          |              |     |
| ALK.times.uln  | <  | 5.446215139 |               |    |             |               | -0.001190384 | 944          |              |     |
| ALK.times.uln  | >= | 5.446215139 | PLT.resultn   | =  | Missing     |               | 0.000426899  | 944          |              |     |
| ALK.times.uln  | >= | 5.446215139 | PLT.resultn   | <  | 290.5       |               | 0.00170959   | 944          |              |     |
| ALK.times.uln  | >= | 5.446215139 | PLT.resultn   | >= | 290.5       |               | -0.000559787 | 944          |              |     |
| Sodium.resultn | =  | Missing     |               |    |             | Missing       | -0.003021274 | 945          |              |     |
| Sodium.resultn | <  | 136.5       |               |    |             | Missing       | -0.0006268   | 945          |              |     |
| Sodium.resultn | >= | 136.5       | ALK.times.uln | =  | Missing     | TBILL.resultn | =            | Missing      | -0.001653798 | 945 |
| Sodium.resultn | >= | 136.5       | ALK.times.uln | =  | Missing     | TBILL.resultn | <            | 0.75         | -0.003180381 | 945 |
| Sodium.resultn | >= | 136.5       | ALK.times.uln | =  | Missing     | TBILL.resultn | >=           | 0.75         | 0            | 945 |
| Sodium.resultn | >= | 136.5       | ALK.times.uln | <  | 5.857962963 |               | Missing      | -0.002597231 | 945          |     |
| Sodium.resultn | >= | 136.5       | ALK.times.uln | >= | 5.857962963 |               | Missing      | -0.001344938 | 945          |     |
| TBILL.resultn  | =  | Missing     |               |    |             |               | 0.000379195  | 946          |              |     |
| TBILL.resultn  | <  | 1.95        | ALB.resultn   | =  | Missing     |               | 0            | 946          |              |     |
| TBILL.resultn  | <  | 1.95        | ALB.resultn   | <  | 3.465       |               | -0.001440066 | 946          |              |     |
| TBILL.resultn  | <  | 1.95        | ALB.resultn   | >= | 3.465       |               | -0.00081261  | 946          |              |     |
| TBILL.resultn  | >= | 1.95        | AST.resultn   | =  | Missing     |               | 0.000231716  | 946          |              |     |
| TBILL.resultn  | >= | 1.95        | AST.resultn   | <  | 96.5        |               | -0.000797442 | 946          |              |     |
| TBILL.resultn  | >= | 1.95        | AST.resultn   | >= | 96.5        |               | 0.001346637  | 946          |              |     |
| Sodium.resultn | =  | Missing     |               |    |             | Missing       | -0.003991381 | 947          |              |     |
| Sodium.resultn | <  | 136.5       |               |    |             | Missing       | -0.001587593 | 947          |              |     |
| Sodium.resultn | >= | 136.5       | age.yrs       | =  | Missing     | Missing       | -0.003810288 | 947          |              |     |
| Sodium.resultn | >= | 136.5       | age.yrs       | <  | 55.45790554 | Missing       | -0.00430356  | 947          |              |     |
| Sodium.resultn | >= | 136.5       | age.yrs       | >= | 55.45790554 | AST.resultn   | =            | Missing      | -0.002434318 | 947 |
| Sodium.resultn | >= | 136.5       | age.yrs       | >= | 55.45790554 | AST.resultn   | <            | 52.5         | -0.004625204 | 947 |
| Sodium.resultn | >= | 136.5       | age.yrs       | >= | 55.45790554 | AST.resultn   | >=           | 52.5         | 0            | 947 |
| age.yrs        | =  | Missing     |               |    |             |               | 0.000336736  | 948          |              |     |
| age.yrs        | <  | 63.31143053 | PLT.resultn   | =  | Missing     |               | 0            | 948          |              |     |
| age.yrs        | <  | 63.31143053 | PLT.resultn   | <  | 249.5       |               | 0.000684335  | 948          |              |     |
| age.yrs        | <  | 63.31143053 | PLT.resultn   | >= | 249.5       |               | -0.000343042 | 948          |              |     |

|               |    |             |                |    |         |             |    |              |              |     |
|---------------|----|-------------|----------------|----|---------|-------------|----|--------------|--------------|-----|
| age.yrs       | >= | 63.31143053 | AST.resultn    | =  | Missing |             |    | 0.002973954  | 948          |     |
| age.yrs       | >= | 63.31143053 | AST.resultn    | <  | 51      |             |    | -0.000676025 | 948          |     |
| age.yrs       | >= | 63.31143053 | AST.resultn    | >= | 51      |             |    | 0.007287565  | 948          |     |
| ALK.times.uln | =  | Missing     | TBILL.resultn  | =  | Missing |             |    | -0.000192736 | 949          |     |
| ALK.times.uln | =  | Missing     | TBILL.resultn  | <  | 1.31    |             |    | -0.000647521 | 949          |     |
| ALK.times.uln | =  | Missing     | TBILL.resultn  | >= | 1.31    |             |    | 0.001285318  | 949          |     |
| ALK.times.uln | <  | 5.446215139 |                |    |         |             |    | -0.000550702 | 949          |     |
| ALK.times.uln | >= | 5.446215139 | AST.resultn    | =  | Missing |             |    | 0.001074927  | 949          |     |
| ALK.times.uln | >= | 5.446215139 | AST.resultn    | <  | 112.5   |             |    | 0.002443015  | 949          |     |
| ALK.times.uln | >= | 5.446215139 | AST.resultn    | >= | 112.5   |             |    | 0            | 949          |     |
| ALK.times.uln | =  | Missing     |                |    |         |             |    | 0.000685285  | 950          |     |
| ALK.times.uln | <  | 5.462893197 | PLT.resultn    | =  | Missing |             |    | 0            | 950          |     |
| ALK.times.uln | <  | 5.462893197 | PLT.resultn    | <  | 186     |             |    | 0.003940876  | 950          |     |
| ALK.times.uln | <  | 5.462893197 | PLT.resultn    | >= | 186     |             |    | 0.000564601  | 950          |     |
| ALK.times.uln | >= | 5.462893197 | AST.resultn    | =  | Missing |             |    | 0.002744573  | 950          |     |
| ALK.times.uln | >= | 5.462893197 | AST.resultn    | <  | 119.5   |             |    | 0.004175356  | 950          |     |
| ALK.times.uln | >= | 5.462893197 | AST.resultn    | >= | 119.5   |             |    | 0.00131379   | 950          |     |
| ALK.times.uln | =  | Missing     |                |    |         | Missing     |    | -0.003756691 | 951          |     |
| ALK.times.uln | <  | 6.02        | TBILL.resultn  | =  | Missing | Missing     |    | -0.003745606 | 951          |     |
| ALK.times.uln | <  | 6.02        | TBILL.resultn  | <  | 3.5     | age.yrs     | =  | Missing      | -0.003854853 | 951 |
| ALK.times.uln | <  | 6.02        | TBILL.resultn  | <  | 3.5     | age.yrs     | <  | 69.84257358  | -0.004106804 | 951 |
| ALK.times.uln | <  | 6.02        | TBILL.resultn  | <  | 3.5     | age.yrs     | >= | 69.84257358  | 0            | 951 |
| ALK.times.uln | <  | 6.02        | TBILL.resultn  | >= | 3.5     |             |    | Missing      | -0.001964891 | 951 |
| ALK.times.uln | >= | 6.02        |                |    |         |             |    | Missing      | -0.001506284 | 951 |
| ALK.times.uln | =  | Missing     | TBILL.resultn  | =  | Missing |             |    | Missing      | -0.005730307 | 952 |
| ALK.times.uln | =  | Missing     | TBILL.resultn  | <  | 0.95    |             |    | Missing      | -0.005821352 | 952 |
| ALK.times.uln | =  | Missing     | TBILL.resultn  | >= | 0.95    | age.yrs     | =  | Missing      | -0.002096612 | 952 |
| ALK.times.uln | =  | Missing     | TBILL.resultn  | >= | 0.95    | age.yrs     | <  | 49.54551677  | -0.004002623 | 952 |
| ALK.times.uln | =  | Missing     | TBILL.resultn  | >= | 0.95    | age.yrs     | >= | 49.54551677  | 0            | 952 |
| ALK.times.uln | <  | 6.02173913  |                |    |         | Missing     |    | -0.005642033 | 952          |     |
| ALK.times.uln | >= | 6.02173913  |                |    |         | Missing     |    | -0.00354183  | 952          |     |
| age.yrs       | =  | Missing     |                |    |         | Missing     |    | 0.000871846  | 953          |     |
| age.yrs       | <  | 69.84257358 | TBILL.resultn  | =  | Missing |             |    | Missing      | 0.001113154  | 953 |
| age.yrs       | <  | 69.84257358 | TBILL.resultn  | <  | 2.35    | ALB.resultn | =  | Missing      | 0            | 953 |
| age.yrs       | <  | 69.84257358 | TBILL.resultn  | <  | 2.35    | ALB.resultn | <  | 3.135        | 2.43E-06     | 953 |
| age.yrs       | <  | 69.84257358 | TBILL.resultn  | <  | 2.35    | ALB.resultn | >= | 3.135        | 0.000559369  | 953 |
| age.yrs       | <  | 69.84257358 | TBILL.resultn  | >= | 2.35    |             |    | Missing      | 0.00189722   | 953 |
| age.yrs       | >= | 69.84257358 |                |    |         | Missing     |    | Missing      | 0.006189644  | 953 |
| ALK.times.uln | =  | Missing     | TBILL.resultn  | =  | Missing |             |    | 2.63E-05     | 954          |     |
| ALK.times.uln | =  | Missing     | TBILL.resultn  | <  | 1.4     |             |    | 0.000623785  | 954          |     |
| ALK.times.uln | =  | Missing     | TBILL.resultn  | >= | 1.4     |             |    | 0.003012681  | 954          |     |
| ALK.times.uln | <  | 6.02        | TBILL.resultn  | =  | Missing |             |    | 0.000236598  | 954          |     |
| ALK.times.uln | <  | 6.02        | TBILL.resultn  | <  | 2.05    |             |    | 0.000260741  | 954          |     |
| ALK.times.uln | <  | 6.02        | TBILL.resultn  | >= | 2.05    |             |    | 0            | 954          |     |
| ALK.times.uln | >= | 6.02        |                |    |         |             |    | 0.003243865  | 954          |     |
| ALB.resultn   | =  | Missing     |                |    |         | Missing     |    | -0.000549098 | 955          |     |
| ALB.resultn   | <  | 2.95        |                |    |         | Missing     |    | 0.001410158  | 955          |     |
| ALB.resultn   | >= | 2.95        | TBILL.resultn  | =  | Missing |             |    | Missing      | -0.000485864 | 955 |
| ALB.resultn   | >= | 2.95        | TBILL.resultn  | <  | 2.05    |             |    | Missing      | -0.000636845 | 955 |
| ALB.resultn   | >= | 2.95        | TBILL.resultn  | >= | 2.05    | AST.resultn | =  | Missing      | 0.000859236  | 955 |
| ALB.resultn   | >= | 2.95        | TBILL.resultn  | >= | 2.05    | AST.resultn | <  | 148          | 0.001718472  | 955 |
| ALB.resultn   | >= | 2.95        | TBILL.resultn  | >= | 2.05    | AST.resultn | >= | 148          | 0            | 955 |
| ALB.resultn   | =  | Missing     |                |    |         | Missing     |    | -2.53E-05    | 956          |     |
| ALB.resultn   | <  | 3.13        |                |    |         | Missing     |    | 0.00189433   | 956          |     |
| ALB.resultn   | >= | 3.13        | Sodium.resultn | =  | Missing |             |    | Missing      | 0.000393643  | 956 |
| ALB.resultn   | >= | 3.13        | Sodium.resultn | <  | 137.5   | AST.resultn | =  | Missing      | 0.00313218   | 956 |
| ALB.resultn   | >= | 3.13        | Sodium.resultn | <  | 137.5   | AST.resultn | <  | 67           | 0.005285554  | 956 |
| ALB.resultn   | >= | 3.13        | Sodium.resultn | <  | 137.5   | AST.resultn | >= | 67           | 0            | 956 |
| ALB.resultn   | >= | 3.13        | Sodium.resultn | >= | 137.5   |             |    | Missing      | 0.000375139  | 956 |
| age.yrs       | =  | Missing     |                |    |         | Missing     |    | Missing      | -0.002248257 | 957 |
| age.yrs       | <  | 68.1724846  | TBILL.resultn  | =  | Missing |             |    | Missing      | -0.00112464  | 957 |
| age.yrs       | <  | 68.1724846  | TBILL.resultn  | <  | 2.35    |             |    | Missing      | -0.002630729 | 957 |

|               |    |             |               |    |             |             |    |             |              |     |
|---------------|----|-------------|---------------|----|-------------|-------------|----|-------------|--------------|-----|
| age.yrs       | <  | 68.1724846  | TBILL.resultn | >= | 2.35        | psc.yrs.dur | =  | Missing     | -0.001188601 | 957 |
| age.yrs       | <  | 68.1724846  | TBILL.resultn | >= | 2.35        | psc.yrs.dur | <  | 0.438056126 | -0.002377202 | 957 |
| age.yrs       | <  | 68.1724846  | TBILL.resultn | >= | 2.35        | psc.yrs.dur | >= | 0.438056126 | 0            | 957 |
| age.yrs       | >= | 68.1724846  |               |    |             |             |    | Missing     | 0.002254678  | 957 |
| ALK.times.uln | =  | Missing     | ALB.resultn   | =  | Missing     |             |    | Missing     | -0.002425402 | 958 |
| ALK.times.uln | =  | Missing     | ALB.resultn   | <  | 3.95        | age.yrs     | =  | Missing     | -0.001112036 | 958 |
| ALK.times.uln | =  | Missing     | ALB.resultn   | <  | 3.95        | age.yrs     | <  | 50.88843258 | -0.002446479 | 958 |
| ALK.times.uln | =  | Missing     | ALB.resultn   | <  | 3.95        | age.yrs     | >= | 50.88843258 | 0            | 958 |
| ALK.times.uln | =  | Missing     | ALB.resultn   | >= | 3.95        |             |    | Missing     | -0.002032853 | 958 |
| ALK.times.uln | <  | 6.888446215 |               |    |             |             |    | Missing     | -0.001758085 | 958 |
| ALK.times.uln | >= | 6.888446215 |               |    |             |             |    | Missing     | -0.000385135 | 958 |
| TBILL.resultn | =  | Missing     |               |    |             |             |    |             | 0.000427323  | 959 |
| TBILL.resultn | <  | 1.65        | PLT.resultn   | =  | Missing     |             |    |             | 0            | 959 |
| TBILL.resultn | <  | 1.65        | PLT.resultn   | <  | 185.5       |             |    |             | 0.001257554  | 959 |
| TBILL.resultn | <  | 1.65        | PLT.resultn   | >= | 185.5       |             |    |             | -0.000617877 | 959 |
| TBILL.resultn | >= | 1.65        | PLT.resultn   | =  | Missing     |             |    |             | 0.000916685  | 959 |
| TBILL.resultn | >= | 1.65        | PLT.resultn   | <  | 217         |             |    |             | 0.002025986  | 959 |
| TBILL.resultn | >= | 1.65        | PLT.resultn   | >= | 217         |             |    |             | 0.000362034  | 959 |
| ALK.times.uln | =  | Missing     | TBILL.resultn | =  | Missing     |             |    |             | -0.001477693 | 960 |
| ALK.times.uln | =  | Missing     | TBILL.resultn | <  | 0.75        |             |    |             | -0.002335708 | 960 |
| ALK.times.uln | =  | Missing     | TBILL.resultn | >= | 0.75        |             |    |             | 0            | 960 |
| ALK.times.uln | <  | 6.02        | TBILL.resultn | =  | Missing     |             |    |             | -0.001804789 | 960 |
| ALK.times.uln | <  | 6.02        | TBILL.resultn | <  | 2.85        |             |    |             | -0.001939026 | 960 |
| ALK.times.uln | <  | 6.02        | TBILL.resultn | >= | 2.85        |             |    |             | 0.000306383  | 960 |
| ALK.times.uln | >= | 6.02        |               |    |             |             |    |             | 4.34E-05     | 960 |
| TBILL.resultn | =  | Missing     |               |    |             |             |    |             | 0.000106897  | 961 |
| TBILL.resultn | <  | 2.35        | ALK.times.uln | =  | Missing     |             |    |             | 0            | 961 |
| TBILL.resultn | <  | 2.35        | ALK.times.uln | <  | 3.904220484 |             |    |             | -0.001388453 | 961 |
| TBILL.resultn | <  | 2.35        | ALK.times.uln | >= | 3.904220484 |             |    |             | 7.74E-05     | 961 |
| TBILL.resultn | >= | 2.35        | psc.yrs.dur   | =  | Missing     |             |    |             | 0.000175259  | 961 |
| TBILL.resultn | >= | 2.35        | psc.yrs.dur   | <  | 0.454483231 |             |    |             | -0.000630295 | 961 |
| TBILL.resultn | >= | 2.35        | psc.yrs.dur   | >= | 0.454483231 |             |    |             | 0.001141923  | 961 |
| age.yrs       | =  | Missing     |               |    |             |             |    | Missing     | -0.004026087 | 962 |
| age.yrs       | <  | 55.77138946 |               |    |             |             |    | Missing     | -0.004180441 | 962 |
| age.yrs       | >= | 55.77138946 | AST.resultn   | =  | Missing     |             |    | Missing     | -0.00350448  | 962 |
| age.yrs       | >= | 55.77138946 | AST.resultn   | <  | 51.5        |             |    | Missing     | -0.004768092 | 962 |
| age.yrs       | >= | 55.77138946 | AST.resultn   | >= | 51.5        | psc.yrs.dur | =  | Missing     | -0.001997866 | 962 |
| age.yrs       | >= | 55.77138946 | AST.resultn   | >= | 51.5        | psc.yrs.dur | <  | 1.92881588  | -0.003462967 | 962 |
| age.yrs       | >= | 55.77138946 | AST.resultn   | >= | 51.5        | psc.yrs.dur | >= | 1.92881588  | 0            | 962 |
| ALB.resultn   | =  | Missing     |               |    |             |             |    | Missing     | -0.000888887 | 963 |
| ALB.resultn   | <  | 3.03        |               |    |             |             |    | Missing     | 0.000537583  | 963 |
| ALB.resultn   | >= | 3.03        | psc.yrs.dur   | =  | Missing     |             |    | Missing     | -0.000658968 | 963 |
| ALB.resultn   | >= | 3.03        | psc.yrs.dur   | <  | 12.50102669 | age.yrs     | =  | Missing     | -0.000893862 | 963 |
| ALB.resultn   | >= | 3.03        | psc.yrs.dur   | <  | 12.50102669 | age.yrs     | <  | 56.84188912 | -0.001133678 | 963 |
| ALB.resultn   | >= | 3.03        | psc.yrs.dur   | <  | 12.50102669 | age.yrs     | >= | 56.84188912 | 0            | 963 |
| ALB.resultn   | >= | 3.03        | psc.yrs.dur   | >= | 12.50102669 |             |    | Missing     | 0.004226832  | 963 |
| TBILL.resultn | =  | Missing     |               |    |             |             |    | Missing     | -3.49E-05    | 964 |
| TBILL.resultn | <  | 3.75        | age.yrs       | =  | Missing     |             |    | Missing     | 0.000765118  | 964 |
| TBILL.resultn | <  | 3.75        | age.yrs       | <  | 63.52635181 |             |    | Missing     | 0.000495334  | 964 |
| TBILL.resultn | <  | 3.75        | age.yrs       | >= | 63.52635181 | ALB.resultn | =  | Missing     | 0.002912599  | 964 |
| TBILL.resultn | <  | 3.75        | age.yrs       | >= | 63.52635181 | ALB.resultn | <  | 3.95        | 0.006698978  | 964 |
| TBILL.resultn | <  | 3.75        | age.yrs       | >= | 63.52635181 | ALB.resultn | >= | 3.95        | 0            | 964 |
| TBILL.resultn | >= | 3.75        |               |    |             |             |    | Missing     | 0.002119529  | 964 |
| ALK.times.uln | =  | Missing     | age.yrs       | =  | Missing     |             |    |             | -0.001289542 | 965 |
| ALK.times.uln | =  | Missing     | age.yrs       | <  | 53.55509925 |             |    |             | -0.002026423 | 965 |
| ALK.times.uln | =  | Missing     | age.yrs       | >= | 53.55509925 |             |    |             | 0            | 965 |
| ALK.times.uln | <  | 5.462893197 | PLT.resultn   | =  | Missing     |             |    |             | 0.000431764  | 965 |
| ALK.times.uln | <  | 5.462893197 | PLT.resultn   | <  | 185.5       |             |    |             | 0.001371654  | 965 |
| ALK.times.uln | <  | 5.462893197 | PLT.resultn   | >= | 185.5       |             |    |             | -0.0019207   | 965 |
| ALK.times.uln | >= | 5.462893197 |               |    |             |             |    |             | 0.000247682  | 965 |
| TBILL.resultn | =  | Missing     |               |    |             |             |    | Missing     | 0.000325232  | 966 |
| TBILL.resultn | <  | 1.65        |               |    |             |             |    | Missing     | 9.74E-05     | 966 |

|                |    |             |                |    |             |               |              |             |              |     |
|----------------|----|-------------|----------------|----|-------------|---------------|--------------|-------------|--------------|-----|
| TBILL.resultn  | >= | 1.65        | PLT.resultn    | =  | Missing     | Missing       | 0.001249175  | 966         |              |     |
| TBILL.resultn  | >= | 1.65        | PLT.resultn    | <  | 220.5       | Missing       | 0.002539374  | 966         |              |     |
| TBILL.resultn  | >= | 1.65        | PLT.resultn    | >= | 220.5       | AST.resultn   | =            | Missing     | 0.000604075  | 966 |
| TBILL.resultn  | >= | 1.65        | PLT.resultn    | >= | 220.5       | AST.resultn   | <            | 149.5       | 0.001328966  | 966 |
| TBILL.resultn  | >= | 1.65        | PLT.resultn    | >= | 220.5       | AST.resultn   | >=           | 149.5       | 0            | 966 |
| ALB.resultn    | =  | Missing     |                |    |             | Missing       | -0.002419244 | 967         |              |     |
| ALB.resultn    | <  | 2.875       |                |    |             | Missing       | 7.91E-05     | 967         |              |     |
| ALB.resultn    | >= | 2.875       | psc.yrs.dur    | =  | Missing     | Missing       | -0.002329673 | 967         |              |     |
| ALB.resultn    | >= | 2.875       | psc.yrs.dur    | <  | 0.802190281 | Missing       | -0.002824753 | 967         |              |     |
| ALB.resultn    | >= | 2.875       | psc.yrs.dur    | >= | 0.802190281 | age.yrs       | =            | Missing     | -0.001634337 | 967 |
| ALB.resultn    | >= | 2.875       | psc.yrs.dur    | >= | 0.802190281 | age.yrs       | <            | 51.71526352 | -0.002465356 | 967 |
| ALB.resultn    | >= | 2.875       | psc.yrs.dur    | >= | 0.802190281 | age.yrs       | >=           | 51.71526352 | 0            | 967 |
| TBILL.resultn  | =  | Missing     |                |    |             | Missing       | -0.003724049 | 968         |              |     |
| TBILL.resultn  | <  | 0.75        |                |    |             | Missing       | -0.006294785 | 968         |              |     |
| TBILL.resultn  | >= | 0.75        | psc.yrs.dur    | =  | Missing     | Missing       | -0.004612775 | 968         |              |     |
| TBILL.resultn  | >= | 0.75        | psc.yrs.dur    | <  | 0.802190281 | Missing       | -0.005977761 | 968         |              |     |
| TBILL.resultn  | >= | 0.75        | psc.yrs.dur    | >= | 0.802190281 | age.yrs       | =            | Missing     | -0.003320913 | 968 |
| TBILL.resultn  | >= | 0.75        | psc.yrs.dur    | >= | 0.802190281 | age.yrs       | <            | 53.55509925 | -0.005026246 | 968 |
| TBILL.resultn  | >= | 0.75        | psc.yrs.dur    | >= | 0.802190281 | age.yrs       | >=           | 53.55509925 | 0            | 968 |
| Sodium.resultn | =  | Missing     |                |    |             | Missing       | 0.00040094   | 969         |              |     |
| Sodium.resultn | <  | 138.5       | ALB.resultn    | =  | Missing     | Missing       | 0.002391267  | 969         |              |     |
| Sodium.resultn | <  | 138.5       | ALB.resultn    | <  | 3.645       | Missing       | 0.00326284   | 969         |              |     |
| Sodium.resultn | <  | 138.5       | ALB.resultn    | >= | 3.645       | AST.resultn   | =            | Missing     | 0.002116033  | 969 |
| Sodium.resultn | <  | 138.5       | ALB.resultn    | >= | 3.645       | AST.resultn   | <            | 65.5        | 0.004467181  | 969 |
| Sodium.resultn | <  | 138.5       | ALB.resultn    | >= | 3.645       | AST.resultn   | >=           | 65.5        | 0            | 969 |
| Sodium.resultn | >= | 138.5       |                |    |             | Missing       | 0.000661321  | 969         |              |     |
| ALB.resultn    | =  | Missing     |                |    |             | Missing       | -0.001404653 | 970         |              |     |
| ALB.resultn    | <  | 2.95        |                |    |             | Missing       | 0.001235788  | 970         |              |     |
| ALB.resultn    | >= | 2.95        | TBILL.resultn  | =  | Missing     | Missing       | -0.001427946 | 970         |              |     |
| ALB.resultn    | >= | 2.95        | TBILL.resultn  | <  | 0.75        | Missing       | -0.001943923 | 970         |              |     |
| ALB.resultn    | >= | 2.95        | TBILL.resultn  | >= | 0.75        | ALK.times.uln | =            | Missing     | 0            | 970 |
| ALB.resultn    | >= | 2.95        | TBILL.resultn  | >= | 0.75        | ALK.times.uln | <            | 2.81254114  | -0.001939609 | 970 |
| ALB.resultn    | >= | 2.95        | TBILL.resultn  | >= | 0.75        | ALK.times.uln | >=           | 2.81254114  | 9.42E-06     | 970 |
| psc.yrs.dur    | =  | Missing     |                |    |             | Missing       | 0.000912725  | 971         |              |     |
| psc.yrs.dur    | <  | 6.410677618 |                |    |             | Missing       | 0.00069021   | 971         |              |     |
| psc.yrs.dur    | >= | 6.410677618 | AST.resultn    | =  | Missing     | Missing       | 0.001974728  | 971         |              |     |
| psc.yrs.dur    | >= | 6.410677618 | AST.resultn    | <  | 89.5        | psc.yrs.dur   | =            | Missing     | 0.00119949   | 971 |
| psc.yrs.dur    | >= | 6.410677618 | AST.resultn    | <  | 89.5        | psc.yrs.dur   | <            | 9.876796715 | 0.002638879  | 971 |
| psc.yrs.dur    | >= | 6.410677618 | AST.resultn    | <  | 89.5        | psc.yrs.dur   | >=           | 9.876796715 | 0            | 971 |
| psc.yrs.dur    | >= | 6.410677618 | AST.resultn    | >= | 89.5        | Missing       | 0.004300439  | 971         |              |     |
| ALK.times.uln  | =  | Missing     | TBILL.resultn  | =  | Missing     | Missing       | -0.00217841  | 972         |              |     |
| ALK.times.uln  | =  | Missing     | TBILL.resultn  | <  | 0.75        | Missing       | -0.002195862 | 972         |              |     |
| ALK.times.uln  | =  | Missing     | TBILL.resultn  | >= | 0.75        | age.yrs       | =            | Missing     | -0.000992553 | 972 |
| ALK.times.uln  | =  | Missing     | TBILL.resultn  | >= | 0.75        | age.yrs       | <            | 50.7063655  | -0.002150531 | 972 |
| ALK.times.uln  | =  | Missing     | TBILL.resultn  | >= | 0.75        | age.yrs       | >=           | 50.7063655  | 0            | 972 |
| ALK.times.uln  | <  | 5.963877551 |                |    |             | Missing       | -0.001459064 | 972         |              |     |
| ALK.times.uln  | >= | 5.963877551 |                |    |             | Missing       | -0.00016111  | 972         |              |     |
| Sodium.resultn | =  | Missing     |                |    |             | Missing       | -0.001003153 | 973         |              |     |
| Sodium.resultn | <  | 136.5       |                |    |             | Missing       | 0.001498014  | 973         |              |     |
| Sodium.resultn | >= | 136.5       | AST.resultn    | =  | Missing     | Missing       | -0.000733664 | 973         |              |     |
| Sodium.resultn | >= | 136.5       | AST.resultn    | <  | 197         | age.yrs       | =            | Missing     | -0.000828535 | 973 |
| Sodium.resultn | >= | 136.5       | AST.resultn    | <  | 197         | age.yrs       | <            | 48.66255989 | -0.001420346 | 973 |
| Sodium.resultn | >= | 136.5       | AST.resultn    | <  | 197         | age.yrs       | >=           | 48.66255989 | 0            | 973 |
| Sodium.resultn | >= | 136.5       | AST.resultn    | >= | 197         | Missing       | 0.000518632  | 973         |              |     |
| ALB.resultn    | =  | Missing     |                |    |             | Missing       | -0.001255261 | 974         |              |     |
| ALB.resultn    | <  | 2.915       |                |    |             | Missing       | 0.002064516  | 974         |              |     |
| ALB.resultn    | >= | 2.915       | Sodium.resultn | =  | Missing     | Missing       | -0.001244956 | 974         |              |     |
| ALB.resultn    | >= | 2.915       | Sodium.resultn | <  | 136.5       | Missing       | 0.001747762  | 974         |              |     |
| ALB.resultn    | >= | 2.915       | Sodium.resultn | >= | 136.5       | TBILL.resultn | =            | Missing     | -0.000647186 | 974 |
| ALB.resultn    | >= | 2.915       | Sodium.resultn | >= | 136.5       | TBILL.resultn | <            | 0.85        | -0.001248145 | 974 |
| ALB.resultn    | >= | 2.915       | Sodium.resultn | >= | 136.5       | TBILL.resultn | >=           | 0.85        | 0            | 974 |
| ALK.times.uln  | =  | Missing     | TBILL.resultn  | =  | Missing     | Missing       | -0.003076438 | 975         |              |     |

|                |    |             |               |    |                          |               |              |              |              |     |
|----------------|----|-------------|---------------|----|--------------------------|---------------|--------------|--------------|--------------|-----|
| ALK.times.uln  | =  | Missing     | TBILI.resultn | <  | 0.75                     | Missing       | -0.003154573 | 975          |              |     |
| ALK.times.uln  | =  | Missing     | TBILI.resultn | >= | 0.75 age.yrs             | =             | Missing      | -0.001437308 | 975          |     |
| ALK.times.uln  | =  | Missing     | TBILI.resultn | >= | 0.75 age.yrs             | <             | 50.98151951  | -0.003135945 | 975          |     |
| ALK.times.uln  | =  | Missing     | TBILI.resultn | >= | 0.75 age.yrs             | >=            | 50.98151951  | 0            | 975          |     |
| ALK.times.uln  | <  | 6.068877551 |               |    |                          | Missing       | -0.002638024 | 975          |              |     |
| ALK.times.uln  | >= | 6.068877551 |               |    |                          | Missing       | -0.000454269 | 975          |              |     |
| age.yrs        | =  | Missing     |               |    |                          | Missing       | -0.003675241 | 976          |              |     |
| age.yrs        | <  | 49.10198494 |               |    |                          | Missing       | -0.003941984 | 976          |              |     |
| age.yrs        | >= | 49.10198494 | AST.resultn   | =  | Missing                  | Missing       | -0.003205541 | 976          |              |     |
| age.yrs        | >= | 49.10198494 | AST.resultn   | <  | 57                       | Missing       | -0.004320807 | 976          |              |     |
| age.yrs        | >= | 49.10198494 | AST.resultn   | >= | 57 Hemoglobin.resultn    | =             | Missing      | 0            | 976          |     |
| age.yrs        | >= | 49.10198494 | AST.resultn   | >= | 57 Hemoglobin.resultn    | <             | 14.15        | -0.002239763 | 976          |     |
| age.yrs        | >= | 49.10198494 | AST.resultn   | >= | 57 Hemoglobin.resultn    | >=            | 14.15        | -0.004275218 | 976          |     |
| Sodium.resultn | =  | Missing     |               |    |                          | Missing       | -0.002034122 | 977          |              |     |
| Sodium.resultn | <  | 136.5       |               |    |                          | Missing       | 0.000278937  | 977          |              |     |
| Sodium.resultn | >= | 136.5       | PLT.resultn   | =  | Missing                  | Missing       | -0.001084875 | 977          |              |     |
| Sodium.resultn | >= | 136.5       | PLT.resultn   | <  | 185.5                    | Missing       | 0.002358615  | 977          |              |     |
| Sodium.resultn | >= | 136.5       | PLT.resultn   | >= | 185.5 Hemoglobin.resultn | =             | Missing      | 0            | 977          |     |
| Sodium.resultn | >= | 136.5       | PLT.resultn   | >= | 185.5 Hemoglobin.resultn | <             | 13.45        | -0.001157345 | 977          |     |
| Sodium.resultn | >= | 136.5       | PLT.resultn   | >= | 185.5 Hemoglobin.resultn | >=            | 13.45        | -0.002317524 | 977          |     |
| ALB.resultn    | =  | Missing     |               |    |                          | Missing       | -0.001724717 | 978          |              |     |
| ALB.resultn    | <  | 2.915       |               |    |                          | Missing       | -0.000120518 | 978          |              |     |
| ALB.resultn    | >= | 2.915       | TBILI.resultn | =  | Missing                  | Missing       | -0.00226179  | 978          |              |     |
| ALB.resultn    | >= | 2.915       | TBILI.resultn | <  | 1.55                     | Missing       | -0.002367273 | 978          |              |     |
| ALB.resultn    | >= | 2.915       | TBILI.resultn | >= | 1.55 age.yrs             | =             | Missing      | -0.001314104 | 978          |     |
| ALB.resultn    | >= | 2.915       | TBILI.resultn | >= | 1.55 age.yrs             | <             | 51.51813826  | -0.002044162 | 978          |     |
| ALB.resultn    | >= | 2.915       | TBILI.resultn | >= | 1.55 age.yrs             | >=            | 51.51813826  | 0            | 978          |     |
| ALB.resultn    | =  | Missing     |               |    |                          | Missing       | -0.001056331 | 979          |              |     |
| ALB.resultn    | <  | 3.615       | PLT.resultn   | =  | Missing                  | Missing       | -0.000126168 | 979          |              |     |
| ALB.resultn    | <  | 3.615       | PLT.resultn   | <  | 218                      | Missing       | 0.002525772  | 979          |              |     |
| ALB.resultn    | <  | 3.615       | PLT.resultn   | >= | 218 TBILI.resultn        | =             | Missing      | -0.000855451 | 979          |     |
| ALB.resultn    | <  | 3.615       | PLT.resultn   | >= | 218 TBILI.resultn        | <             | 1.35         | -0.001235652 | 979          |     |
| ALB.resultn    | <  | 3.615       | PLT.resultn   | >= | 218 TBILI.resultn        | >=            | 1.35         | 0            | 979          |     |
| ALB.resultn    | >= | 3.615       |               |    |                          | Missing       | -0.001362646 | 979          |              |     |
| age.yrs        | =  | Missing     |               |    |                          | Missing       | 0.000700715  | 980          |              |     |
| age.yrs        | <  | 69.84257358 | ALK.times.uln | =  | Missing                  | TBILI.resultn | =            | Missing      | 0            | 980 |
| age.yrs        | <  | 69.84257358 | ALK.times.uln | =  | Missing                  | TBILI.resultn | <            | 1.15         | 0.000569708  | 980 |
| age.yrs        | <  | 69.84257358 | ALK.times.uln | =  | Missing                  | TBILI.resultn | >=           | 1.15         | 0.003010281  | 980 |
| age.yrs        | <  | 69.84257358 | ALK.times.uln | <  | 6.115825908              |               | Missing      | 0.000182836  | 980          |     |
| age.yrs        | <  | 69.84257358 | ALK.times.uln | >= | 6.115825908              |               | Missing      | 0.001830163  | 980          |     |
| age.yrs        | >= | 69.84257358 |               |    |                          | Missing       | 0.006295541  | 980          |              |     |
| AST.resultn    | =  | Missing     |               |    |                          | Missing       | -0.00281701  | 981          |              |     |
| AST.resultn    | <  | 43.5        |               |    |                          | Missing       | -0.00282168  | 981          |              |     |
| AST.resultn    | >= | 43.5        | age.yrs       | =  | Missing                  | Missing       | -0.001573356 | 981          |              |     |
| AST.resultn    | >= | 43.5        | age.yrs       | <  | 48.89390828              | Missing       | -0.002031869 | 981          |              |     |
| AST.resultn    | >= | 43.5        | age.yrs       | >= | 48.89390828              | psc.yrs.dur   | =            | Missing      | -0.000770957 | 981 |
| AST.resultn    | >= | 43.5        | age.yrs       | >= | 48.89390828              | psc.yrs.dur   | <            | 0.454483231  | -0.001909037 | 981 |
| AST.resultn    | >= | 43.5        | age.yrs       | >= | 48.89390828              | psc.yrs.dur   | >=           | 0.454483231  | 0            | 981 |
| psc.yrs.dur    | =  | Missing     |               |    |                          |               | 0.000844715  | 982          |              |     |
| psc.yrs.dur    | <  | 8.026009582 | PLT.resultn   | =  | Missing                  |               | 0            | 982          |              |     |
| psc.yrs.dur    | <  | 8.026009582 | PLT.resultn   | <  | 197.5                    |               | 0.001920268  | 982          |              |     |
| psc.yrs.dur    | <  | 8.026009582 | PLT.resultn   | >= | 197.5                    |               | 0.00052825   | 982          |              |     |
| psc.yrs.dur    | >= | 8.026009582 | AST.resultn   | =  | Missing                  |               | 0.002865126  | 982          |              |     |
| psc.yrs.dur    | >= | 8.026009582 | AST.resultn   | <  | 43                       |               | 3.21E-06     | 982          |              |     |
| psc.yrs.dur    | >= | 8.026009582 | AST.resultn   | >= | 43                       |               | 0.0050666    | 982          |              |     |
| ALK.times.uln  | =  | Missing     | TBILI.resultn | =  | Missing                  |               | -0.000515148 | 983          |              |     |
| ALK.times.uln  | =  | Missing     | TBILI.resultn | <  | 1.15                     |               | -1.29E-05    | 983          |              |     |
| ALK.times.uln  | =  | Missing     | TBILI.resultn | >= | 1.15                     |               | 0.002039019  | 983          |              |     |
| ALK.times.uln  | <  | 5.462893197 |               |    |                          |               | -0.000240674 | 983          |              |     |
| ALK.times.uln  | >= | 5.462893197 | ALK.times.uln | =  | Missing                  |               | 0.001303013  | 983          |              |     |
| ALK.times.uln  | >= | 5.462893197 | ALK.times.uln | <  | 8.257538256              |               | 0.002146139  | 983          |              |     |
| ALK.times.uln  | >= | 5.462893197 | ALK.times.uln | >= | 8.257538256              |               | 0            | 983          |              |     |



|                |    |                         |    |                     |               |    |         |              |              |     |
|----------------|----|-------------------------|----|---------------------|---------------|----|---------|--------------|--------------|-----|
| ALB.resultn    | =  | Missing                 |    |                     |               |    |         | -0.001004342 | 984          |     |
| ALB.resultn    | <  | 3.31 PLT.resultn        | =  | Missing             |               |    |         | 0.000397005  | 984          |     |
| ALB.resultn    | <  | 3.31 PLT.resultn        | <  | 251.5               |               |    |         | 0.001599909  | 984          |     |
| ALB.resultn    | <  | 3.31 PLT.resultn        | >= | 251.5               |               |    |         | -0.000548133 | 984          |     |
| ALB.resultn    | >= | 3.31 psc.yrs.dur        | =  | Missing             |               |    |         | -0.000943188 | 984          |     |
| ALB.resultn    | >= | 3.31 psc.yrs.dur        | <  | 2.043805613         |               |    |         | -0.001312549 | 984          |     |
| ALB.resultn    | >= | 3.31 psc.yrs.dur        | >= | 2.043805613         |               |    |         | 0            | 984          |     |
| ALB.resultn    | =  | Missing                 |    |                     |               |    |         | -0.000366446 | 985          |     |
| ALB.resultn    | <  | 3.31 psc.yrs.dur        | =  | Missing             |               |    |         | 0.002197587  | 985          |     |
| ALB.resultn    | <  | 3.31 psc.yrs.dur        | <  | 3.199178645         |               |    |         | 0.000415089  | 985          |     |
| ALB.resultn    | <  | 3.31 psc.yrs.dur        | >= | 3.199178645         |               |    |         | 0.004514835  | 985          |     |
| ALB.resultn    | >= | 3.31 ALK.times.uln      | =  | Missing             |               |    |         | 0            | 985          |     |
| ALB.resultn    | >= | 3.31 ALK.times.uln      | <  | 5.628231843         |               |    |         | -0.000511935 | 985          |     |
| ALB.resultn    | >= | 3.31 ALK.times.uln      | >= | 5.628231843         |               |    |         | 0.001208548  | 985          |     |
| Sodium.resultn | =  | Missing                 |    |                     |               |    | Missing | -0.001626409 | 986          |     |
| Sodium.resultn | <  | 136.5                   |    |                     |               |    | Missing | 0.001465458  | 986          |     |
| Sodium.resultn | >= | 136.5 ALK.times.uln     | =  | Missing             | AST.resultn   | =  | Missing | -0.000919548 | 986          |     |
| Sodium.resultn | >= | 136.5 ALK.times.uln     | =  | Missing             | AST.resultn   | <  | 52.5    | -0.001781623 | 986          |     |
| Sodium.resultn | >= | 136.5 ALK.times.uln     | =  | Missing             | AST.resultn   | >= | 52.5    | 0            | 986          |     |
| Sodium.resultn | >= | 136.5 ALK.times.uln     | <  | 6.02                |               |    | Missing | -0.001344677 | 986          |     |
| Sodium.resultn | >= | 136.5 ALK.times.uln     | >= | 6.02                |               |    | Missing | 0.000326322  | 986          |     |
| ALB.resultn    | =  | Missing                 |    |                     |               |    | Missing | -0.000741335 | 987          |     |
| ALB.resultn    | <  | 2.915                   |    |                     |               |    | Missing | 0.000478047  | 987          |     |
| ALB.resultn    | >= | 2.915 age.yrs           | =  | Missing             |               |    | Missing | -0.001510021 | 987          |     |
| ALB.resultn    | >= | 2.915 age.yrs           | <  | 49.41957563         |               |    | Missing | -0.001858413 | 987          |     |
| ALB.resultn    | >= | 2.915 age.yrs           | >= | 49.41957563         | TBILI.resultn | =  | Missing | -0.000763465 | 987          |     |
| ALB.resultn    | >= | 2.915 age.yrs           | >= | 49.41957563         | TBILI.resultn | <  | 1.65    | -0.000908261 | 987          |     |
| ALB.resultn    | >= | 2.915 age.yrs           | >= | 49.41957563         | TBILI.resultn | >= | 1.65    | 0            | 987          |     |
| ALB.resultn    | =  | Missing                 |    |                     |               |    | Missing | -0.002387995 | 988          |     |
| ALB.resultn    | <  | 2.95                    |    |                     |               |    | Missing | 0.00097937   | 988          |     |
| ALB.resultn    | >= | 2.95 Sodium.resultn     | =  | Missing             |               |    | Missing | -0.003014206 | 988          |     |
| ALB.resultn    | >= | 2.95 Sodium.resultn     | <  | 140.5 age.yrs       |               |    | Missing | -0.001582689 | 988          |     |
| ALB.resultn    | >= | 2.95 Sodium.resultn     | <  | 140.5 age.yrs       |               |    | <       | 52.65845311  | -0.002297452 | 988 |
| ALB.resultn    | >= | 2.95 Sodium.resultn     | <  | 140.5 age.yrs       |               |    | >=      | 52.65845311  | 0            | 988 |
| ALB.resultn    | >= | 2.95 Sodium.resultn     | >= | 140.5               |               |    | Missing | -0.003002241 | 988          |     |
| psc.yrs.dur    | =  | Missing                 |    |                     |               |    | Missing | -0.003586422 | 989          |     |
| psc.yrs.dur    | <  | 1.961670089             |    |                     |               |    | Missing | -0.004074134 | 989          |     |
| psc.yrs.dur    | >= | 1.961670089 ALB.resultn | =  | Missing             |               |    | Missing | -0.002485944 | 989          |     |
| psc.yrs.dur    | >= | 1.961670089 ALB.resultn | <  | 3.35                |               |    | Missing | -0.000511632 | 989          |     |
| psc.yrs.dur    | >= | 1.961670089 ALB.resultn | >= | 3.35 age.yrs        |               |    | =       | Missing      | -0.002987888 | 989 |
| psc.yrs.dur    | >= | 1.961670089 ALB.resultn | >= | 3.35 age.yrs        |               |    | <       | 53.46475017  | -0.004520139 | 989 |
| psc.yrs.dur    | >= | 1.961670089 ALB.resultn | >= | 3.35 age.yrs        |               |    | >=      | 53.46475017  | 0            | 989 |
| ALK.times.uln  | =  | Missing                 |    |                     |               |    | Missing | 0.000234633  | 990          |     |
| ALK.times.uln  | <  | 2.822501299             |    |                     |               |    | Missing | -0.000152075 | 990          |     |
| ALK.times.uln  | >= | 2.822501299 AST.resultn | =  | Missing             |               |    | Missing | 0.001452469  | 990          |     |
| ALK.times.uln  | >= | 2.822501299 AST.resultn | <  | 64.5                |               |    | Missing | 0.00431044   | 990          |     |
| ALK.times.uln  | >= | 2.822501299 AST.resultn | >= | 64.5 PLT.resultn    |               |    | =       | Missing      | 0.000942118  | 990 |
| ALK.times.uln  | >= | 2.822501299 AST.resultn | >= | 64.5 PLT.resultn    |               |    | <       | 210.5        | 0.004710588  | 990 |
| ALK.times.uln  | >= | 2.822501299 AST.resultn | >= | 64.5 PLT.resultn    |               |    | >=      | 210.5        | 0            | 990 |
| psc.yrs.dur    | =  | Missing                 |    |                     |               |    |         | -0.000112103 | 991          |     |
| psc.yrs.dur    | <  | 6.783025325 PLT.resultn | =  | Missing             |               |    |         | 0            | 991          |     |
| psc.yrs.dur    | <  | 6.783025325 PLT.resultn | <  | 171.5               |               |    |         | 0.002064917  | 991          |     |
| psc.yrs.dur    | <  | 6.783025325 PLT.resultn | >= | 171.5               |               |    |         | -0.000477426 | 991          |     |
| psc.yrs.dur    | >= | 6.783025325 psc.yrs.dur | =  | Missing             |               |    |         | 0.001233731  | 991          |     |
| psc.yrs.dur    | >= | 6.783025325 psc.yrs.dur | <  | 9.45927447          |               |    |         | 0.003369219  | 991          |     |
| psc.yrs.dur    | >= | 6.783025325 psc.yrs.dur | >= | 9.45927447          |               |    |         | -0.000308565 | 991          |     |
| ALB.resultn    | =  | Missing                 |    |                     |               |    | Missing | -0.000930217 | 992          |     |
| ALB.resultn    | <  | 2.915                   |    |                     |               |    | Missing | 0.000728981  | 992          |     |
| ALB.resultn    | >= | 2.915 TBILI.resultn     | =  | Missing             |               |    | Missing | -0.000941561 | 992          |     |
| ALB.resultn    | >= | 2.915 TBILI.resultn     | <  | 0.95                |               |    | Missing | -0.001482679 | 992          |     |
| ALB.resultn    | >= | 2.915 TBILI.resultn     | >= | 0.95 Sodium.resultn |               |    | =       | Missing      | 0            | 992 |
| ALB.resultn    | >= | 2.915 TBILI.resultn     | >= | 0.95 Sodium.resultn |               |    | <       | 138.5        | 0.002397332  | 992 |

|               |    |             |                    |    |             |                |    |             |              |      |
|---------------|----|-------------|--------------------|----|-------------|----------------|----|-------------|--------------|------|
| ALB.resultn   | >= | 2.915       | TBILL.resultn      | >= | 0.95        | Sodium.resultn | >= | 138.5       | -0.000805287 | 992  |
| TBILL.resultn | =  | Missing     |                    |    |             |                |    | Missing     | 0.001906364  | 993  |
| TBILL.resultn | <  | 0.95        |                    |    |             |                |    | Missing     | 0.000363022  | 993  |
| TBILL.resultn | >= | 0.95        | Hemoglobin.resultn | =  | Missing     |                |    | Missing     | 0.002598018  | 993  |
| TBILL.resultn | >= | 0.95        | Hemoglobin.resultn | <  | 13.75       | PLT.resultn    | =  | Missing     | 0.00094904   | 993  |
| TBILL.resultn | >= | 0.95        | Hemoglobin.resultn | <  | 13.75       | PLT.resultn    | <  | 260.5       | 0.002293512  | 993  |
| TBILL.resultn | >= | 0.95        | Hemoglobin.resultn | <  | 13.75       | PLT.resultn    | >= | 260.5       | 0            | 993  |
| TBILL.resultn | >= | 0.95        | Hemoglobin.resultn | >= | 13.75       |                |    | Missing     | 0.000332259  | 993  |
| ALK.times.uln | =  | Missing     | AST.resultn        | =  | Missing     |                |    | Missing     | -0.003669729 | 994  |
| ALK.times.uln | =  | Missing     | AST.resultn        | <  | 65          |                |    | Missing     | -0.003683748 | 994  |
| ALK.times.uln | =  | Missing     | AST.resultn        | >= | 65          | psc.yrs.dur    | =  | Missing     | -0.001604863 | 994  |
| ALK.times.uln | =  | Missing     | AST.resultn        | >= | 65          | psc.yrs.dur    | <  | 0.450376454 | -0.003647417 | 994  |
| ALK.times.uln | =  | Missing     | AST.resultn        | >= | 65          | psc.yrs.dur    | >= | 0.450376454 | 0            | 994  |
| ALK.times.uln | <  | 5.462893197 |                    |    |             |                |    | Missing     | -0.003319882 | 994  |
| ALK.times.uln | >= | 5.462893197 |                    |    |             |                |    | Missing     | -0.000824972 | 994  |
| ALB.resultn   | =  | Missing     |                    |    |             |                |    | Missing     | -0.003858425 | 995  |
| ALB.resultn   | <  | 2.915       |                    |    |             |                |    | Missing     | -0.002753501 | 995  |
| ALB.resultn   | >= | 2.915       | psc.yrs.dur        | =  | Missing     |                |    | Missing     | -0.004181209 | 995  |
| ALB.resultn   | >= | 2.915       | psc.yrs.dur        | <  | 6.324435318 |                |    | Missing     | -0.004441973 | 995  |
| ALB.resultn   | >= | 2.915       | psc.yrs.dur        | >= | 6.324435318 | AST.resultn    | =  | Missing     | -0.002336543 | 995  |
| ALB.resultn   | >= | 2.915       | psc.yrs.dur        | >= | 6.324435318 | AST.resultn    | <  | 47          | -0.004852819 | 995  |
| ALB.resultn   | >= | 2.915       | psc.yrs.dur        | >= | 6.324435318 | AST.resultn    | >= | 47          | 0            | 995  |
| ALB.resultn   | =  | Missing     |                    |    |             |                |    | Missing     | -0.002412864 | 996  |
| ALB.resultn   | <  | 2.965       |                    |    |             |                |    | Missing     | -0.00051296  | 996  |
| ALB.resultn   | >= | 2.965       | age.yrs            | =  | Missing     |                |    | Missing     | -0.002549059 | 996  |
| ALB.resultn   | >= | 2.965       | age.yrs            | <  | 51.9945243  |                |    | Missing     | -0.002857539 | 996  |
| ALB.resultn   | >= | 2.965       | age.yrs            | >= | 51.9945243  | TBILL.resultn  | =  | Missing     | -0.001747012 | 996  |
| ALB.resultn   | >= | 2.965       | age.yrs            | >= | 51.9945243  | TBILL.resultn  | <  | 1.31        | -0.002230229 | 996  |
| ALB.resultn   | >= | 2.965       | age.yrs            | >= | 51.9945243  | TBILL.resultn  | >= | 1.31        | 0            | 996  |
| ALB.resultn   | =  | Missing     | psc.yrs.dur        | =  | Missing     |                |    |             | 0.00154639   | 997  |
| ALB.resultn   | =  | Missing     | psc.yrs.dur        | <  | 0.168377823 |                |    |             | 0.004639169  | 997  |
| ALB.resultn   | =  | Missing     | psc.yrs.dur        | >= | 0.168377823 |                |    |             | 0            | 997  |
| ALB.resultn   | <  | 3.645       | TBILL.resultn      | =  | Missing     |                |    |             | 0.001224235  | 997  |
| ALB.resultn   | <  | 3.645       | TBILL.resultn      | <  | 1.65        |                |    |             | 0.000483988  | 997  |
| ALB.resultn   | <  | 3.645       | TBILL.resultn      | >= | 1.65        |                |    |             | 0.003046379  | 997  |
| ALB.resultn   | >= | 3.645       |                    |    |             |                |    |             | 0.000383901  | 997  |
| TBILL.resultn | =  | Missing     |                    |    |             |                |    |             | 0.002824139  | 998  |
| TBILL.resultn | <  | 1.65        | PLT.resultn        | =  | Missing     |                |    |             | 0            | 998  |
| TBILL.resultn | <  | 1.65        | PLT.resultn        | <  | 267.5       |                |    |             | 0.001331003  | 998  |
| TBILL.resultn | <  | 1.65        | PLT.resultn        | >= | 267.5       |                |    |             | 3.55E-07     | 998  |
| TBILL.resultn | >= | 1.65        | psc.yrs.dur        | =  | Missing     |                |    |             | 0.001279997  | 998  |
| TBILL.resultn | >= | 1.65        | psc.yrs.dur        | <  | 5.704312115 |                |    |             | 0.000436693  | 998  |
| TBILL.resultn | >= | 1.65        | psc.yrs.dur        | >= | 5.704312115 |                |    |             | 0.003388257  | 998  |
| AST.resultn   | =  | Missing     |                    |    |             |                |    | Missing     | -0.006686119 | 999  |
| AST.resultn   | <  | 43.5        |                    |    |             |                |    | Missing     | -0.006670503 | 999  |
| AST.resultn   | >= | 43.5        | age.yrs            | =  | Missing     |                |    | Missing     | -0.005081151 | 999  |
| AST.resultn   | >= | 43.5        | age.yrs            | <  | 55.22518823 |                |    | Missing     | -0.005565213 | 999  |
| AST.resultn   | >= | 43.5        | age.yrs            | >= | 55.22518823 | psc.yrs.dur    | =  | Missing     | -0.003245051 | 999  |
| AST.resultn   | >= | 43.5        | age.yrs            | >= | 55.22518823 | psc.yrs.dur    | <  | 0.735112936 | -0.004952973 | 999  |
| AST.resultn   | >= | 43.5        | age.yrs            | >= | 55.22518823 | psc.yrs.dur    | >= | 0.735112936 | 0            | 999  |
| age.yrs       | =  | Missing     |                    |    |             |                |    | Missing     | -0.003432341 | 1000 |
| age.yrs       | <  | 51.58521561 |                    |    |             |                |    | Missing     | -0.003761295 | 1000 |
| age.yrs       | >= | 51.58521561 | AST.resultn        | =  | Missing     |                |    | Missing     | -0.002729761 | 1000 |
| age.yrs       | >= | 51.58521561 | AST.resultn        | <  | 51          |                |    | Missing     | -0.004070212 | 1000 |
| age.yrs       | >= | 51.58521561 | AST.resultn        | >= | 51          | psc.yrs.dur    | =  | Missing     | -0.001389309 | 1000 |
| age.yrs       | >= | 51.58521561 | AST.resultn        | >= | 51          | psc.yrs.dur    | <  | 0.73100616  | -0.002580146 | 1000 |
| age.yrs       | >= | 51.58521561 | AST.resultn        | >= | 51          | psc.yrs.dur    | >= | 0.73100616  | 0            | 1000 |
| TBILL.resultn | =  | Missing     |                    |    |             |                |    | Missing     | 0.002693539  | 1001 |
| TBILL.resultn | <  | 1.05        |                    |    |             |                |    | Missing     | -0.000611903 | 1001 |
| TBILL.resultn | >= | 1.05        | ALB.resultn        | =  | Missing     |                |    | Missing     | 0.000432067  | 1001 |
| TBILL.resultn | >= | 1.05        | ALB.resultn        | <  | 3.645       | PLT.resultn    | =  | Missing     | 0.001173533  | 1001 |
| TBILL.resultn | >= | 1.05        | ALB.resultn        | <  | 3.645       | PLT.resultn    | <  | 240         | 0.002581772  | 1001 |

|               |    |                         |    |                         |         |             |              |      |
|---------------|----|-------------------------|----|-------------------------|---------|-------------|--------------|------|
| TBILL.resultn | >= | 1.05 ALB.resultn        | <  | 3.645 PLT.resultn       | >=      | 240         | 0            | 1001 |
| TBILL.resultn | >= | 1.05 ALB.resultn        | >= | 3.645                   | Missing |             | 1.82E-05     | 1001 |
| ALB.resultn   | =  | Missing                 |    |                         | Missing |             | -0.000622156 | 1002 |
| ALB.resultn   | <  | 2.915                   |    |                         | Missing |             | 0.001542918  | 1002 |
| ALB.resultn   | >= | 2.915 ALB.resultn       | =  | Missing                 | Missing |             | -0.00040948  | 1002 |
| ALB.resultn   | >= | 2.915 ALB.resultn       | <  | 4.255                   | Missing |             | -0.000839397 | 1002 |
| ALB.resultn   | >= | 2.915 ALB.resultn       | >= | 4.255 ALK.times.uln     | =       | Missing     | 0            | 1002 |
| ALB.resultn   | >= | 2.915 ALB.resultn       | >= | 4.255 ALK.times.uln     | <       | 2.815208295 | -5.12E-05    | 1002 |
| ALB.resultn   | >= | 2.915 ALB.resultn       | >= | 4.255 ALK.times.uln     | >=      | 2.815208295 | 0.003349089  | 1002 |
| TBILL.resultn | =  | Missing                 |    |                         |         |             | 7.98E-05     | 1003 |
| TBILL.resultn | <  | 1.65 ALK.times.uln      | =  | Missing                 |         |             | 0            | 1003 |
| TBILL.resultn | <  | 1.65 ALK.times.uln      | <  | 2.822501299             |         |             | -0.000628177 | 1003 |
| TBILL.resultn | <  | 1.65 ALK.times.uln      | >= | 2.822501299             |         |             | 0.001375849  | 1003 |
| TBILL.resultn | >= | 1.65 ALK.times.uln      | =  | Missing                 |         |             | 0.000798672  | 1003 |
| TBILL.resultn | >= | 1.65 ALK.times.uln      | <  | 3.408179808             |         |             | 0.00140438   | 1003 |
| TBILL.resultn | >= | 1.65 ALK.times.uln      | >= | 3.408179808             |         |             | 0.000371113  | 1003 |
| PLT.resultn   | =  | Missing                 |    |                         |         |             | -0.003607568 | 1004 |
| PLT.resultn   | <  | 194.5 AST.resultn       | =  | Missing                 |         |             | -0.001638516 | 1004 |
| PLT.resultn   | <  | 194.5 AST.resultn       | <  | 71                      |         |             | -0.003141121 | 1004 |
| PLT.resultn   | <  | 194.5 AST.resultn       | >= | 71                      |         |             | 0.000465131  | 1004 |
| PLT.resultn   | >= | 194.5 age.yrs           | =  | Missing                 |         |             | -0.003217635 | 1004 |
| PLT.resultn   | >= | 194.5 age.yrs           | <  | 68.1724846              |         |             | -0.003384352 | 1004 |
| PLT.resultn   | >= | 194.5 age.yrs           | >= | 68.1724846              |         |             | 0            | 1004 |
| ALB.resultn   | =  | Missing                 |    |                         | Missing |             | -0.00024532  | 1005 |
| ALB.resultn   | <  | 2.915                   |    |                         | Missing |             | 0.002220685  | 1005 |
| ALB.resultn   | >= | 2.915 TBILL.resultn     | =  | Missing                 | Missing |             | -8.68E-05    | 1005 |
| ALB.resultn   | >= | 2.915 TBILL.resultn     | <  | 2.05 ALK.times.uln      | =       | Missing     | 0            | 1005 |
| ALB.resultn   | >= | 2.915 TBILL.resultn     | <  | 2.05 ALK.times.uln      | <       | 5.340833404 | -0.000480749 | 1005 |
| ALB.resultn   | >= | 2.915 TBILL.resultn     | <  | 2.05 ALK.times.uln      | >=      | 5.340833404 | 0.001533184  | 1005 |
| ALB.resultn   | >= | 2.915 TBILL.resultn     | >= | 2.05                    | Missing |             | 0.001782221  | 1005 |
| TBILL.resultn | =  | Missing                 |    |                         |         |             | -0.001944253 | 1006 |
| TBILL.resultn | <  | 1.65 age.yrs            | =  | Missing                 |         |             | -0.002796478 | 1006 |
| TBILL.resultn | <  | 1.65 age.yrs            | <  | 69.76043806             |         |             | -0.002955042 | 1006 |
| TBILL.resultn | <  | 1.65 age.yrs            | >= | 69.76043806             |         |             | 0            | 1006 |
| TBILL.resultn | >= | 1.65 Hemoglobin.resultn | =  | Missing                 |         |             | -0.002157433 | 1006 |
| TBILL.resultn | >= | 1.65 Hemoglobin.resultn | <  | 12.75                   |         |             | -0.001682983 | 1006 |
| TBILL.resultn | >= | 1.65 Hemoglobin.resultn | >= | 12.75                   |         |             | -0.002473733 | 1006 |
| ALB.resultn   | =  | Missing                 |    |                         | Missing |             | -0.00128232  | 1007 |
| ALB.resultn   | <  | 2.965                   |    |                         | Missing |             | 0.000559716  | 1007 |
| ALB.resultn   | >= | 2.965 age.yrs           | =  | Missing                 | Missing |             | -0.001491148 | 1007 |
| ALB.resultn   | >= | 2.965 age.yrs           | <  | 49.22655715             | Missing |             | -0.001766454 | 1007 |
| ALB.resultn   | >= | 2.965 age.yrs           | >= | 49.22655715 AST.resultn | =       | Missing     | -0.001068803 | 1007 |
| ALB.resultn   | >= | 2.965 age.yrs           | >= | 49.22655715 AST.resultn | <       | 51.5        | -0.001978423 | 1007 |
| ALB.resultn   | >= | 2.965 age.yrs           | >= | 49.22655715 AST.resultn | >=      | 51.5        | 0            | 1007 |
| ALB.resultn   | =  | Missing                 |    |                         | Missing |             | -0.001798314 | 1008 |
| ALB.resultn   | <  | 2.95                    |    |                         | Missing |             | -0.000363306 | 1008 |
| ALB.resultn   | >= | 2.95 Sodium.resultn     | =  | Missing psc.yrs.dur     | =       | Missing     | -0.002213804 | 1008 |
| ALB.resultn   | >= | 2.95 Sodium.resultn     | =  | Missing psc.yrs.dur     | <       | 5.753593429 | -0.002549229 | 1008 |
| ALB.resultn   | >= | 2.95 Sodium.resultn     | =  | Missing psc.yrs.dur     | >=      | 5.753593429 | 0            | 1008 |
| ALB.resultn   | >= | 2.95 Sodium.resultn     | <  | 136.5                   | Missing |             | 0.000113891  | 1008 |
| ALB.resultn   | >= | 2.95 Sodium.resultn     | >= | 136.5                   | Missing |             | -0.002314748 | 1008 |
| TBILL.resultn | =  | Missing                 |    |                         |         |             | 0.001947098  | 1009 |
| TBILL.resultn | <  | 2.75 Sodium.resultn     | =  | Missing                 |         |             | 0            | 1009 |
| TBILL.resultn | <  | 2.75 Sodium.resultn     | <  | 136.5                   |         |             | 0.001698859  | 1009 |
| TBILL.resultn | <  | 2.75 Sodium.resultn     | >= | 136.5                   |         |             | 0.00044489   | 1009 |
| TBILL.resultn | >= | 2.75 psc.yrs.dur        | =  | Missing                 |         |             | 0.001762996  | 1009 |
| TBILL.resultn | >= | 2.75 psc.yrs.dur        | <  | 2.318959617             |         |             | 0.00051668   | 1009 |
| TBILL.resultn | >= | 2.75 psc.yrs.dur        | >= | 2.318959617             |         |             | 0.003009312  | 1009 |
| ALB.resultn   | =  | Missing                 |    |                         | Missing |             | 0.000267725  | 1010 |
| ALB.resultn   | <  | 3.225                   |    |                         | Missing |             | 0.001869068  | 1010 |
| ALB.resultn   | >= | 3.225 ALK.times.uln     | =  | Missing                 | Missing |             | 0.00026623   | 1010 |
| ALB.resultn   | >= | 3.225 ALK.times.uln     | <  | 3.593257185             | Missing |             | -0.000484928 | 1010 |

|               |    |                         |    |                         |    |            |              |      |
|---------------|----|-------------------------|----|-------------------------|----|------------|--------------|------|
| ALB.resultn   | >= | 3.225 ALK.times.uln     | >= | 3.593257185 AST.resultn | =  | Missing    | 0.001390885  | 1010 |
| ALB.resultn   | >= | 3.225 ALK.times.uln     | >= | 3.593257185 AST.resultn | <  | 83         | 0.005285362  | 1010 |
| ALB.resultn   | >= | 3.225 ALK.times.uln     | >= | 3.593257185 AST.resultn | >= | 83         | 0            | 1010 |
| ALB.resultn   | =  | Missing                 |    |                         |    | Missing    | -0.003489727 | 1011 |
| ALB.resultn   | <  | 2.965                   |    |                         |    | Missing    | -0.001260353 | 1011 |
| ALB.resultn   | >= | 2.965 age.yrs           | =  | Missing                 |    | Missing    | -0.002866083 | 1011 |
| ALB.resultn   | >= | 2.965 age.yrs           | <  | 51.58521561             |    | Missing    | -0.003280918 | 1011 |
| ALB.resultn   | >= | 2.965 age.yrs           | >= | 51.58521561 AST.resultn | =  | Missing    | -0.001918774 | 1011 |
| ALB.resultn   | >= | 2.965 age.yrs           | >= | 51.58521561 AST.resultn | <  | 51.5       | -0.003422677 | 1011 |
| ALB.resultn   | >= | 2.965 age.yrs           | >= | 51.58521561 AST.resultn | >= | 51.5       | 0            | 1011 |
| ALB.resultn   | =  | Missing                 |    |                         |    | Missing    | -0.002228981 | 1012 |
| ALB.resultn   | <  | 2.965                   |    |                         |    | Missing    | 0.000374873  | 1012 |
| ALB.resultn   | >= | 2.965 PLT.resultn       | =  | Missing                 |    | Missing    | -0.001123743 | 1012 |
| ALB.resultn   | >= | 2.965 PLT.resultn       | <  | 267.5 ALK.times.uln     | =  | Missing    | 0            | 1012 |
| ALB.resultn   | >= | 2.965 PLT.resultn       | <  | 267.5 ALK.times.uln     | <  | 3.17826087 | -0.001880842 | 1012 |
| ALB.resultn   | >= | 2.965 PLT.resultn       | <  | 267.5 ALK.times.uln     | >= | 3.17826087 | 0.000181054  | 1012 |
| ALB.resultn   | >= | 2.965 PLT.resultn       | >= | 267.5                   |    | Missing    | -0.002250911 | 1012 |
| ALK.times.uln | =  | Missing psc.yrs.dur     | =  | Missing                 |    | Missing    | -0.003467435 | 1013 |
| ALK.times.uln | =  | Missing psc.yrs.dur     | <  | 0.839151266             |    | Missing    | -0.004216713 | 1013 |
| ALK.times.uln | =  | Missing psc.yrs.dur     | >= | 0.839151266 AST.resultn | =  | Missing    | -0.002577667 | 1013 |
| ALK.times.uln | =  | Missing psc.yrs.dur     | >= | 0.839151266 AST.resultn | <  | 57.5       | -0.004397197 | 1013 |
| ALK.times.uln | =  | Missing psc.yrs.dur     | >= | 0.839151266 AST.resultn | >= | 57.5       | 0            | 1013 |
| ALK.times.uln | <  | 5.857962963             |    |                         |    | Missing    | -0.00399192  | 1013 |
| ALK.times.uln | >= | 5.857962963             |    |                         |    | Missing    | -0.002019592 | 1013 |
| ALB.resultn   | =  | Missing                 |    |                         |    | Missing    | -0.003357386 | 1014 |
| ALB.resultn   | <  | 2.965                   |    |                         |    | Missing    | -0.000793565 | 1014 |
| ALB.resultn   | >= | 2.965 psc.yrs.dur       | =  | Missing                 |    | Missing    | -0.003637484 | 1014 |
| ALB.resultn   | >= | 2.965 psc.yrs.dur       | <  | 7.314168378             |    | Missing    | -0.003794138 | 1014 |
| ALB.resultn   | >= | 2.965 psc.yrs.dur       | >= | 7.314168378 AST.resultn | =  | Missing    | -0.002329761 | 1014 |
| ALB.resultn   | >= | 2.965 psc.yrs.dur       | >= | 7.314168378 AST.resultn | <  | 60.5       | -0.004121884 | 1014 |
| ALB.resultn   | >= | 2.965 psc.yrs.dur       | >= | 7.314168378 AST.resultn | >= | 60.5       | 0            | 1014 |
| TBILI.resultn | =  | Missing                 |    |                         |    |            | -0.002371055 | 1015 |
| TBILI.resultn | <  | 1.65 age.yrs            | =  | Missing                 |    |            | -0.00306921  | 1015 |
| TBILI.resultn | <  | 1.65 age.yrs            | <  | 69.76043806             |    |            | -0.003242345 | 1015 |
| TBILI.resultn | <  | 1.65 age.yrs            | >= | 69.76043806             |    |            | 0            | 1015 |
| TBILI.resultn | >= | 1.65 PLT.resultn        | =  | Missing                 |    |            | -0.001686121 | 1015 |
| TBILI.resultn | >= | 1.65 PLT.resultn        | <  | 222                     |    |            | 0.001459823  | 1015 |
| TBILI.resultn | >= | 1.65 PLT.resultn        | >= | 222                     |    |            | -0.003116096 | 1015 |
| ALB.resultn   | =  | Missing                 |    |                         |    | Missing    | -0.001654175 | 1016 |
| ALB.resultn   | <  | 3.105                   |    |                         |    | Missing    | -0.000369972 | 1016 |
| ALB.resultn   | >= | 3.105 psc.yrs.dur       | =  | Missing                 |    | Missing    | -0.001734843 | 1016 |
| ALB.resultn   | >= | 3.105 psc.yrs.dur       | <  | 0.832306639             |    | Missing    | -0.00233655  | 1016 |
| ALB.resultn   | >= | 3.105 psc.yrs.dur       | >= | 0.832306639 AST.resultn | =  | Missing    | -0.001030844 | 1016 |
| ALB.resultn   | >= | 3.105 psc.yrs.dur       | >= | 0.832306639 AST.resultn | <  | 47.5       | -0.002349366 | 1016 |
| ALB.resultn   | >= | 3.105 psc.yrs.dur       | >= | 0.832306639 AST.resultn | >= | 47.5       | 0            | 1016 |
| ALB.resultn   | =  | Missing                 |    |                         |    | Missing    | -0.002034508 | 1017 |
| ALB.resultn   | <  | 2.875                   |    |                         |    | Missing    | -0.000644803 | 1017 |
| ALB.resultn   | >= | 2.875 TBILI.resultn     | =  | Missing                 |    | Missing    | -0.002453318 | 1017 |
| ALB.resultn   | >= | 2.875 TBILI.resultn     | <  | 0.95                    |    | Missing    | -0.002906589 | 1017 |
| ALB.resultn   | >= | 2.875 TBILI.resultn     | >= | 0.95 Hemoglobin.resultn | =  | Missing    | 0            | 1017 |
| ALB.resultn   | >= | 2.875 TBILI.resultn     | >= | 0.95 Hemoglobin.resultn | <  | 13.35      | -0.001175002 | 1017 |
| ALB.resultn   | >= | 2.875 TBILI.resultn     | >= | 0.95 Hemoglobin.resultn | >= | 13.35      | -0.002476604 | 1017 |
| psc.yrs.dur   | =  | Missing                 |    |                         |    | Missing    | -0.000367621 | 1018 |
| psc.yrs.dur   | <  | 1.874058864             |    |                         |    | Missing    | -0.000793407 | 1018 |
| psc.yrs.dur   | >= | 1.874058864 ALB.resultn | =  | Missing                 |    | Missing    | 0.000464147  | 1018 |
| psc.yrs.dur   | >= | 1.874058864 ALB.resultn | <  | 3.25                    |    | Missing    | 0.00127735   | 1018 |
| psc.yrs.dur   | >= | 1.874058864 ALB.resultn | >= | 3.25 PLT.resultn        | =  | Missing    | 0.000342773  | 1018 |
| psc.yrs.dur   | >= | 1.874058864 ALB.resultn | >= | 3.25 PLT.resultn        | <  | 209.5      | 0.001770994  | 1018 |
| psc.yrs.dur   | >= | 1.874058864 ALB.resultn | >= | 3.25 PLT.resultn        | >= | 209.5      | 0            | 1018 |
| ALB.resultn   | =  | Missing                 |    |                         |    | Missing    | -0.000208288 | 1019 |
| ALB.resultn   | <  | 3.615 Sodium.resultn    | =  | Missing                 |    | Missing    | 0.000278906  | 1019 |
| ALB.resultn   | <  | 3.615 Sodium.resultn    | <  | 140.5 PLT.resultn       | =  | Missing    | 0.000993962  | 1019 |

|                |    |             |                    |    |             |                |         |             |              |      |
|----------------|----|-------------|--------------------|----|-------------|----------------|---------|-------------|--------------|------|
| ALB.resultn    | <  | 3.615       | Sodium.resultn     | <  | 140.5       | PLT.resultn    | <       | 216.5       | 0.002584301  | 1019 |
| ALB.resultn    | <  | 3.615       | Sodium.resultn     | <  | 140.5       | PLT.resultn    | >=      | 216.5       | 0            | 1019 |
| ALB.resultn    | <  | 3.615       | Sodium.resultn     | >= | 140.5       |                | Missing |             | -0.001008194 | 1019 |
| ALB.resultn    | >= | 3.615       |                    |    |             |                | Missing |             | -0.000940457 | 1019 |
| Sodium.resultn | =  | Missing     | TBILL.resultn      | =  | Missing     |                |         |             | 0.000841207  | 1020 |
| Sodium.resultn | =  | Missing     | TBILL.resultn      | <  | 1.31        |                |         |             | -0.000288153 | 1020 |
| Sodium.resultn | =  | Missing     | TBILL.resultn      | >= | 1.31        |                |         |             | 0.002497788  | 1020 |
| Sodium.resultn | <  | 136.5       |                    |    |             |                |         |             | 0.002610015  | 1020 |
| Sodium.resultn | >= | 136.5       | PLT.resultn        | =  | Missing     |                |         |             | 0.000354758  | 1020 |
| Sodium.resultn | >= | 136.5       | PLT.resultn        | <  | 210.5       |                |         |             | 0.002389951  | 1020 |
| Sodium.resultn | >= | 136.5       | PLT.resultn        | >= | 210.5       |                |         |             | 0            | 1020 |
| Sodium.resultn | =  | Missing     | TBILL.resultn      | =  | Missing     |                |         |             | -0.001202728 | 1021 |
| Sodium.resultn | =  | Missing     | TBILL.resultn      | <  | 1.25        |                |         |             | -0.001625697 | 1021 |
| Sodium.resultn | =  | Missing     | TBILL.resultn      | >= | 1.25        |                |         |             | 0.000414506  | 1021 |
| Sodium.resultn | <  | 136.5       |                    |    |             |                |         |             | 0.001679035  | 1021 |
| Sodium.resultn | >= | 136.5       | Hemoglobin.resultn | =  | Missing     |                |         |             | 0            | 1021 |
| Sodium.resultn | >= | 136.5       | Hemoglobin.resultn | <  | 12.85       |                |         |             | -0.001089533 | 1021 |
| Sodium.resultn | >= | 136.5       | Hemoglobin.resultn | >= | 12.85       |                |         |             | -0.000966149 | 1021 |
| TBILL.resultn  | =  | Missing     |                    |    |             |                | Missing |             | 0.001283244  | 1022 |
| TBILL.resultn  | <  | 3.15        | age.yrs            | =  | Missing     |                | Missing |             | 0.000542585  | 1022 |
| TBILL.resultn  | <  | 3.15        | age.yrs            | <  | 69.84257358 | Sodium.resultn | =       | Missing     | 0            | 1022 |
| TBILL.resultn  | <  | 3.15        | age.yrs            | <  | 69.84257358 | Sodium.resultn | <       | 136.5       | 0.001830187  | 1022 |
| TBILL.resultn  | <  | 3.15        | age.yrs            | <  | 69.84257358 | Sodium.resultn | >=      | 136.5       | 0.000480858  | 1022 |
| TBILL.resultn  | <  | 3.15        | age.yrs            | >= | 69.84257358 |                | Missing |             | 0.004539344  | 1022 |
| TBILL.resultn  | >= | 3.15        |                    |    |             |                | Missing |             | 0.003369007  | 1022 |
| TBILL.resultn  | =  | Missing     |                    |    |             |                |         |             | 0.001004344  | 1023 |
| TBILL.resultn  | <  | 2.75        | PLT.resultn        | =  | Missing     |                |         |             | 0            | 1023 |
| TBILL.resultn  | <  | 2.75        | PLT.resultn        | <  | 185.5       |                |         |             | 0.002398445  | 1023 |
| TBILL.resultn  | <  | 2.75        | PLT.resultn        | >= | 185.5       |                |         |             | 0.000461874  | 1023 |
| TBILL.resultn  | >= | 2.75        | psc.yrs.dur        | =  | Missing     |                |         |             | 0.002007647  | 1023 |
| TBILL.resultn  | >= | 2.75        | psc.yrs.dur        | <  | 1.4770705   |                |         |             | 0.000801556  | 1023 |
| TBILL.resultn  | >= | 2.75        | psc.yrs.dur        | >= | 1.4770705   |                |         |             | 0.003213739  | 1023 |
| TBILL.resultn  | =  | Missing     |                    |    |             |                | Missing |             | 0.001961607  | 1024 |
| TBILL.resultn  | <  | 1.55        |                    |    |             |                | Missing |             | 0.000498768  | 1024 |
| TBILL.resultn  | >= | 1.55        | age.yrs            | =  | Missing     |                | Missing |             | 0.001973173  | 1024 |
| TBILL.resultn  | >= | 1.55        | age.yrs            | <  | 51.10746064 | age.yrs        | =       | Missing     | 0.000943384  | 1024 |
| TBILL.resultn  | >= | 1.55        | age.yrs            | <  | 51.10746064 | age.yrs        | <       | 38.94729637 | 0.002487103  | 1024 |
| TBILL.resultn  | >= | 1.55        | age.yrs            | <  | 51.10746064 | age.yrs        | >=      | 38.94729637 | 0            | 1024 |
| TBILL.resultn  | >= | 1.55        | age.yrs            | >= | 51.10746064 |                | Missing |             | 0.004688071  | 1024 |
| TBILL.resultn  | =  | Missing     |                    |    |             |                |         |             | -0.000916438 | 1025 |
| TBILL.resultn  | <  | 2.05        | Sodium.resultn     | =  | Missing     |                |         |             | -0.003045996 | 1025 |
| TBILL.resultn  | <  | 2.05        | Sodium.resultn     | <  | 136.5       |                |         |             | -0.000433489 | 1025 |
| TBILL.resultn  | <  | 2.05        | Sodium.resultn     | >= | 136.5       |                |         |             | -0.00287952  | 1025 |
| TBILL.resultn  | >= | 2.05        | psc.yrs.dur        | =  | Missing     |                |         |             | -0.000443149 | 1025 |
| TBILL.resultn  | >= | 2.05        | psc.yrs.dur        | <  | 0.700889802 |                |         |             | -0.000846012 | 1025 |
| TBILL.resultn  | >= | 2.05        | psc.yrs.dur        | >= | 0.700889802 |                |         |             | 0            | 1025 |
| ALK.times.uln  | =  | Missing     | ALB.resultn        | =  | Missing     |                | Missing |             | -0.00425168  | 1026 |
| ALK.times.uln  | =  | Missing     | ALB.resultn        | <  | 3.95        | age.yrs        | =       | Missing     | -0.002128725 | 1026 |
| ALK.times.uln  | =  | Missing     | ALB.resultn        | <  | 3.95        | age.yrs        | <       | 50.88843258 | -0.00425745  | 1026 |
| ALK.times.uln  | =  | Missing     | ALB.resultn        | <  | 3.95        | age.yrs        | >=      | 50.88843258 | 0            | 1026 |
| ALK.times.uln  | =  | Missing     | ALB.resultn        | >= | 3.95        |                | Missing |             | -0.003682268 | 1026 |
| ALK.times.uln  | <  | 5.965616681 |                    |    |             |                | Missing |             | -0.003869081 | 1026 |
| ALK.times.uln  | >= | 5.965616681 |                    |    |             |                | Missing |             | -0.002010384 | 1026 |
| ALK.times.uln  | =  | Missing     | PLT.resultn        | =  | Missing     |                |         |             | -0.001750593 | 1027 |
| ALK.times.uln  | =  | Missing     | PLT.resultn        | <  | 206         |                |         |             | -6.56E-05    | 1027 |
| ALK.times.uln  | =  | Missing     | PLT.resultn        | >= | 206         |                |         |             | -0.001723234 | 1027 |
| ALK.times.uln  | <  | 5.92438247  | TBILL.resultn      | =  | Missing     |                |         |             | -0.001205809 | 1027 |
| ALK.times.uln  | <  | 5.92438247  | TBILL.resultn      | <  | 2.55        |                |         |             | -0.001279334 | 1027 |
| ALK.times.uln  | <  | 5.92438247  | TBILL.resultn      | >= | 2.55        |                |         |             | 0            | 1027 |
| ALK.times.uln  | >= | 5.92438247  |                    |    |             |                |         |             | 0.000972603  | 1027 |
| psc.yrs.dur    | =  | Missing     |                    |    |             |                | Missing |             | -0.003144338 | 1028 |
| psc.yrs.dur    | <  | 6.379192334 |                    |    |             |                | Missing |             | -0.003300577 | 1028 |

|                |    |             |                    |    |             |                |              |             |              |      |
|----------------|----|-------------|--------------------|----|-------------|----------------|--------------|-------------|--------------|------|
| psc.yrs.dur    | >= | 6.379192334 | AST.resultn        | =  | Missing     | Missing        | -0.002256248 | 1028        |              |      |
| psc.yrs.dur    | >= | 6.379192334 | AST.resultn        | <  | 43          | Missing        | -0.003971798 | 1028        |              |      |
| psc.yrs.dur    | >= | 6.379192334 | AST.resultn        | >= | 43 age.yrs  | =              | Missing      | -0.00079803 | 1028         |      |
| psc.yrs.dur    | >= | 6.379192334 | AST.resultn        | >= | 43 age.yrs  | <              | 51.63175907  | -0.00159606 | 1028         |      |
| psc.yrs.dur    | >= | 6.379192334 | AST.resultn        | >= | 43 age.yrs  | >=             | 51.63175907  | 0           | 1028         |      |
| AST.resultn    | =  | Missing     |                    |    |             | Missing        | -0.003085308 | 1029        |              |      |
| AST.resultn    | <  | 43          |                    |    |             | Missing        | -0.003069525 | 1029        |              |      |
| AST.resultn    | >= | 43 age.yrs  |                    | =  | Missing     | Missing        | -0.001855189 | 1029        |              |      |
| AST.resultn    | >= | 43 age.yrs  |                    | <  | 51.63175907 | Missing        | -0.002234625 | 1029        |              |      |
| AST.resultn    | >= | 43 age.yrs  |                    | >= | 51.63175907 | psc.yrs.dur    | =            | Missing     | -0.001065343 | 1029 |
| AST.resultn    | >= | 43 age.yrs  |                    | >= | 51.63175907 | psc.yrs.dur    | <            | 0.476386037 | -0.002269643 | 1029 |
| AST.resultn    | >= | 43 age.yrs  |                    | >= | 51.63175907 | psc.yrs.dur    | >=           | 0.476386037 | 0            | 1029 |
| ALK.times.uln  | =  | Missing     | ALB.resultn        | =  | Missing     |                | 2.29E-06     | 1030        |              |      |
| ALK.times.uln  | =  | Missing     | ALB.resultn        | <  | 3.95        |                | 0.001707701  | 1030        |              |      |
| ALK.times.uln  | =  | Missing     | ALB.resultn        | >= | 3.95        |                | -3.26E-06    | 1030        |              |      |
| ALK.times.uln  | <  | 6.02        | ALB.resultn        | =  | Missing     |                | 0            | 1030        |              |      |
| ALK.times.uln  | <  | 6.02        | ALB.resultn        | <  | 3.33        |                | 0.002383774  | 1030        |              |      |
| ALK.times.uln  | <  | 6.02        | ALB.resultn        | >= | 3.33        |                | 0.000385432  | 1030        |              |      |
| ALK.times.uln  | >= | 6.02        |                    |    |             |                | 0.002043758  | 1030        |              |      |
| PLT.resultn    | =  | Missing     |                    |    |             |                | -0.000227665 | 1031        |              |      |
| PLT.resultn    | <  | 185.5       | AST.resultn        | =  | Missing     |                | 0.002035244  | 1031        |              |      |
| PLT.resultn    | <  | 185.5       | AST.resultn        | <  | 71.5        |                | 0.000662908  | 1031        |              |      |
| PLT.resultn    | <  | 185.5       | AST.resultn        | >= | 71.5        |                | 0.003282821  | 1031        |              |      |
| PLT.resultn    | >= | 185.5       | psc.yrs.dur        | =  | Missing     |                | 0.000198118  | 1031        |              |      |
| PLT.resultn    | >= | 185.5       | psc.yrs.dur        | <  | 0.001368925 |                | 0.0026812    | 1031        |              |      |
| PLT.resultn    | >= | 185.5       | psc.yrs.dur        | >= | 0.001368925 |                | 0            | 1031        |              |      |
| Sodium.resultn | =  | Missing     |                    |    |             |                | -0.001567908 | 1032        |              |      |
| Sodium.resultn | <  | 138.5       | age.yrs            | =  | Missing     |                | 0.000181696  | 1032        |              |      |
| Sodium.resultn | <  | 138.5       | age.yrs            | <  | 49.14852841 |                | -0.000559539 | 1032        |              |      |
| Sodium.resultn | <  | 138.5       | age.yrs            | >= | 49.14852841 |                | 0.001367673  | 1032        |              |      |
| Sodium.resultn | >= | 138.5       | ALK.times.uln      | =  | Missing     |                | 0            | 1032        |              |      |
| Sodium.resultn | >= | 138.5       | ALK.times.uln      | <  | 5.743849372 |                | -0.00155448  | 1032        |              |      |
| Sodium.resultn | >= | 138.5       | ALK.times.uln      | >= | 5.743849372 |                | 0.000223026  | 1032        |              |      |
| ALK.times.uln  | =  | Missing     | age.yrs            | =  | Missing     |                | 0.000638401  | 1033        |              |      |
| ALK.times.uln  | =  | Missing     | age.yrs            | <  | 53.55509925 |                | -0.000265802 | 1033        |              |      |
| ALK.times.uln  | =  | Missing     | age.yrs            | >= | 53.55509925 |                | 0.002732344  | 1033        |              |      |
| ALK.times.uln  | <  | 5.926121601 | TBILLI.resultn     | =  | Missing     |                | 0.000310615  | 1033        |              |      |
| ALK.times.uln  | <  | 5.926121601 | TBILLI.resultn     | <  | 0.95        |                | 0.000495845  | 1033        |              |      |
| ALK.times.uln  | <  | 5.926121601 | TBILLI.resultn     | >= | 0.95        |                | 0            | 1033        |              |      |
| ALK.times.uln  | >= | 5.926121601 |                    |    |             |                | 0.002090508  | 1033        |              |      |
| ALB.resultn    | =  | Missing     |                    |    |             | Missing        | 0.000777964  | 1034        |              |      |
| ALB.resultn    | <  | 2.915       |                    |    |             | Missing        | 0.002230078  | 1034        |              |      |
| ALB.resultn    | >= | 2.915       | age.yrs            | =  | Missing     |                | 0.000715263  | 1034        |              |      |
| ALB.resultn    | >= | 2.915       | age.yrs            | <  | 51.63175907 |                | 0.000275428  | 1034        |              |      |
| ALB.resultn    | >= | 2.915       | age.yrs            | >= | 51.63175907 | Sodium.resultn | =            | Missing     | 0            | 1034 |
| ALB.resultn    | >= | 2.915       | age.yrs            | >= | 51.63175907 | Sodium.resultn | <            | 138.5       | 0.004439507  | 1034 |
| ALB.resultn    | >= | 2.915       | age.yrs            | >= | 51.63175907 | Sodium.resultn | >=           | 138.5       | 0.001162316  | 1034 |
| TBILLI.resultn | =  | Missing     |                    |    |             |                | -0.002397933 | 1035        |              |      |
| TBILLI.resultn | <  | 2.05        | age.yrs            | =  | Missing     |                | -0.001438542 | 1035        |              |      |
| TBILLI.resultn | <  | 2.05        | age.yrs            | <  | 55.69883641 |                | -0.001836257 | 1035        |              |      |
| TBILLI.resultn | <  | 2.05        | age.yrs            | >= | 55.69883641 |                | 0            | 1035        |              |      |
| TBILLI.resultn | >= | 2.05        | Hemoglobin.resultn | =  | Missing     |                | -0.001037155 | 1035        |              |      |
| TBILLI.resultn | >= | 2.05        | Hemoglobin.resultn | <  | 13.65       |                | -0.000561757 | 1035        |              |      |
| TBILLI.resultn | >= | 2.05        | Hemoglobin.resultn | >= | 13.65       |                | -0.001512553 | 1035        |              |      |
| ALB.resultn    | =  | Missing     |                    |    |             | Missing        | -0.001646535 | 1036        |              |      |
| ALB.resultn    | <  | 2.915       |                    |    |             | Missing        | 1.35E-05     | 1036        |              |      |
| ALB.resultn    | >= | 2.915       | TBILLI.resultn     | =  | Missing     |                | -0.002176941 | 1036        |              |      |
| ALB.resultn    | >= | 2.915       | TBILLI.resultn     | <  | 0.75        |                | -0.002770896 | 1036        |              |      |
| ALB.resultn    | >= | 2.915       | TBILLI.resultn     | >= | 0.75        | psc.yrs.dur    | =            | Missing     | -0.001593687 | 1036 |
| ALB.resultn    | >= | 2.915       | TBILLI.resultn     | >= | 0.75        | psc.yrs.dur    | <            | 6.410677618 | -0.002105944 | 1036 |
| ALB.resultn    | >= | 2.915       | TBILLI.resultn     | >= | 0.75        | psc.yrs.dur    | >=           | 6.410677618 | 0            | 1036 |
| TBILLI.resultn | =  | Missing     |                    |    |             |                | -0.00207864  | 1037        |              |      |

|                |    |                            |               |                  |               |             |         |              |      |
|----------------|----|----------------------------|---------------|------------------|---------------|-------------|---------|--------------|------|
| TBILL.resultn  | <  | 1.65 age.yrs               | =             | Missing          |               |             |         | -0.00220718  | 1037 |
| TBILL.resultn  | <  | 1.65 age.yrs               | <             | 69.84257358      |               |             |         | -0.002350647 | 1037 |
| TBILL.resultn  | <  | 1.65 age.yrs               | >=            | 69.84257358      |               |             |         | 0            | 1037 |
| TBILL.resultn  | >= | 1.65 PLT.resultn           | =             | Missing          |               |             |         | -0.001223042 | 1037 |
| TBILL.resultn  | >= | 1.65 PLT.resultn           | <             | 207              |               |             |         | -0.000212264 | 1037 |
| TBILL.resultn  | >= | 1.65 PLT.resultn           | >=            | 207              |               |             |         | -0.001896894 | 1037 |
| psc.yrs.dur    | =  | Missing                    |               |                  |               |             |         | 0.000735381  | 1038 |
| psc.yrs.dur    | <  | 6.410677618 Sodium.resultn | =             | Missing          |               |             |         | 0            | 1038 |
| psc.yrs.dur    | <  | 6.410677618 Sodium.resultn | <             | 136.5            |               |             |         | 0.002522984  | 1038 |
| psc.yrs.dur    | <  | 6.410677618 Sodium.resultn | >=            | 136.5            |               |             |         | 0.000608827  | 1038 |
| psc.yrs.dur    | >= | 6.410677618 age.yrs        | =             | Missing          |               |             |         | 0.00202391   | 1038 |
| psc.yrs.dur    | >= | 6.410677618 age.yrs        | <             | 51.71526352      |               |             |         | 2.35E-05     | 1038 |
| psc.yrs.dur    | >= | 6.410677618 age.yrs        | >=            | 51.71526352      |               |             |         | 0.003913151  | 1038 |
| PLT.resultn    | =  | Missing                    |               |                  |               | Missing     |         | -0.001410705 | 1039 |
| PLT.resultn    | <  | 170                        |               |                  |               | Missing     |         | 0.002720169  | 1039 |
| PLT.resultn    | >= | 170 ALK.times.uln          | =             | Missing          | TBILL.resultn | =           | Missing | -0.00118607  | 1039 |
| PLT.resultn    | >= | 170 ALK.times.uln          | =             | Missing          | TBILL.resultn | <           | 0.95    | -0.001870342 | 1039 |
| PLT.resultn    | >= | 170 ALK.times.uln          | =             | Missing          | TBILL.resultn | >=          | 0.95    | 0            | 1039 |
| PLT.resultn    | >= | 170 ALK.times.uln          | <             | 5.963877551      |               | Missing     |         | -0.001585403 | 1039 |
| PLT.resultn    | >= | 170 ALK.times.uln          | >=            | 5.963877551      |               | Missing     |         | 0.000159555  | 1039 |
| Sodium.resultn | =  | Missing                    | TBILL.resultn | =                | Missing       |             |         | -0.002280051 | 1040 |
| Sodium.resultn | =  | Missing                    | TBILL.resultn | <                | 1.25          |             |         | -0.002798245 | 1040 |
| Sodium.resultn | =  | Missing                    | TBILL.resultn | >=               | 1.25          |             |         | 0            | 1040 |
| Sodium.resultn | <  | 136.5                      |               |                  |               |             |         | -0.000389158 | 1040 |
| Sodium.resultn | >= | 136.5 ALB.resultn          | =             | Missing          |               |             |         | -0.002327445 | 1040 |
| Sodium.resultn | >= | 136.5 ALB.resultn          | <             | 3.135            |               |             |         | -0.000689378 | 1040 |
| Sodium.resultn | >= | 136.5 ALB.resultn          | >=            | 3.135            |               |             |         | -0.00247636  | 1040 |
| age.yrs        | =  | Missing                    |               |                  |               | Missing     |         | -0.000131348 | 1041 |
| age.yrs        | <  | 69.43052704 TBILL.resultn  | =             | Missing          |               | Missing     |         | 0.000173883  | 1041 |
| age.yrs        | <  | 69.43052704 TBILL.resultn  | <             | 2.05             |               | Missing     |         | -0.000539051 | 1041 |
| age.yrs        | <  | 69.43052704 TBILL.resultn  | >=            | 2.05 PLT.resultn | =             | Missing     |         | 0.000937506  | 1041 |
| age.yrs        | <  | 69.43052704 TBILL.resultn  | >=            | 2.05 PLT.resultn | <             | 209         |         | 0.002437515  | 1041 |
| age.yrs        | <  | 69.43052704 TBILL.resultn  | >=            | 2.05 PLT.resultn | >=            | 209         |         | 0            | 1041 |
| age.yrs        | >= | 69.43052704                |               |                  |               | Missing     |         | 0.0043939    | 1041 |
| psc.yrs.dur    | =  | Missing                    |               |                  |               | Missing     |         | -0.001806936 | 1042 |
| psc.yrs.dur    | <  | 6.410677618                |               |                  |               | Missing     |         | -0.001941188 | 1042 |
| psc.yrs.dur    | >= | 6.410677618 AST.resultn    | =             | Missing          |               | Missing     |         | -0.001066825 | 1042 |
| psc.yrs.dur    | >= | 6.410677618 AST.resultn    | <             | 47.5             |               | Missing     |         | -0.002611805 | 1042 |
| psc.yrs.dur    | >= | 6.410677618 AST.resultn    | >=            | 47.5 ALB.resultn | =             | Missing     |         | -1.34E-05    | 1042 |
| psc.yrs.dur    | >= | 6.410677618 AST.resultn    | >=            | 47.5 ALB.resultn | <             | 3.95        |         | -2.56E-05    | 1042 |
| psc.yrs.dur    | >= | 6.410677618 AST.resultn    | >=            | 47.5 ALB.resultn | >=            | 3.95        |         | 0            | 1042 |
| PLT.resultn    | =  | Missing                    |               |                  |               |             |         | 0.000408682  | 1043 |
| PLT.resultn    | <  | 196 ALK.times.uln          | =             | Missing          |               |             |         | 0.002277418  | 1043 |
| PLT.resultn    | <  | 196 ALK.times.uln          | <             | 2.081089866      |               |             |         | -0.000450397 | 1043 |
| PLT.resultn    | <  | 196 ALK.times.uln          | >=            | 2.081089866      |               |             |         | 0.005005232  | 1043 |
| PLT.resultn    | >= | 196 ALK.times.uln          | =             | Missing          |               |             |         | 0            | 1043 |
| PLT.resultn    | >= | 196 ALK.times.uln          | <             | 5.963877551      |               |             |         | -0.000136926 | 1043 |
| PLT.resultn    | >= | 196 ALK.times.uln          | >=            | 5.963877551      |               |             |         | 0.001787858  | 1043 |
| PLT.resultn    | =  | Missing                    |               |                  |               | Missing     |         | -0.001040865 | 1044 |
| PLT.resultn    | <  | 183                        |               |                  |               | Missing     |         | 0.002130617  | 1044 |
| PLT.resultn    | >= | 183 PLT.resultn            | =             | Missing          |               | Missing     |         | -0.001189947 | 1044 |
| PLT.resultn    | >= | 183 PLT.resultn            | <             | 411.5 age.yrs    | =             | Missing     |         | -0.001340414 | 1044 |
| PLT.resultn    | >= | 183 PLT.resultn            | <             | 411.5 age.yrs    | <             | 55.69883641 |         | -0.001675517 | 1044 |
| PLT.resultn    | >= | 183 PLT.resultn            | <             | 411.5 age.yrs    | >=            | 55.69883641 |         | 0            | 1044 |
| PLT.resultn    | >= | 183 PLT.resultn            | >=            | 411.5            |               | Missing     |         | 0.000715963  | 1044 |
| psc.yrs.dur    | =  | Missing                    |               |                  |               | Missing     |         | -0.000872727 | 1045 |
| psc.yrs.dur    | <  | 6.324435318                |               |                  |               | Missing     |         | -0.001133183 | 1045 |
| psc.yrs.dur    | >= | 6.324435318 AST.resultn    | =             | Missing          |               | Missing     |         | 0.000563124  | 1045 |
| psc.yrs.dur    | >= | 6.324435318 AST.resultn    | <             | 47.5             |               | Missing     |         | -0.001614227 | 1045 |
| psc.yrs.dur    | >= | 6.324435318 AST.resultn    | >=            | 47.5 psc.yrs.dur | =             | Missing     |         | 0.001983135  | 1045 |
| psc.yrs.dur    | >= | 6.324435318 AST.resultn    | >=            | 47.5 psc.yrs.dur | <             | 9.863107461 |         | 0.004561211  | 1045 |
| psc.yrs.dur    | >= | 6.324435318 AST.resultn    | >=            | 47.5 psc.yrs.dur | >=            | 9.863107461 |         | 0            | 1045 |

|                |    |             |                |    |             |                    |              |             |              |      |
|----------------|----|-------------|----------------|----|-------------|--------------------|--------------|-------------|--------------|------|
| psc.yrs.dur    | =  | Missing     |                |    | Missing     | 0.000130765        | 1046         |             |              |      |
| psc.yrs.dur    | <  | 1.961670089 |                |    | Missing     | -0.000160046       | 1046         |             |              |      |
| psc.yrs.dur    | >= | 1.961670089 | ALB.resultn    | =  | Missing     | 0.000926217        | 1046         |             |              |      |
| psc.yrs.dur    | >= | 1.961670089 | ALB.resultn    | <  | 3.35        | 0.002783546        | 1046         |             |              |      |
| psc.yrs.dur    | >= | 1.961670089 | ALB.resultn    | >= | 3.35        | psc.yrs.dur        | =            | Missing     | 0.000470646  | 1046 |
| psc.yrs.dur    | >= | 1.961670089 | ALB.resultn    | >= | 3.35        | psc.yrs.dur        | <            | 2.911704312 | 0.002267656  | 1046 |
| psc.yrs.dur    | >= | 1.961670089 | ALB.resultn    | >= | 3.35        | psc.yrs.dur        | >=           | 2.911704312 | 0            | 1046 |
| TBILL.resultn  | =  | Missing     |                |    | Missing     | -0.000690619       | 1047         |             |              |      |
| TBILL.resultn  | <  | 0.95        |                |    | Missing     | -0.002119179       | 1047         |             |              |      |
| TBILL.resultn  | >= | 0.95        | psc.yrs.dur    | =  | Missing     | -0.000796523       | 1047         |             |              |      |
| TBILL.resultn  | >= | 0.95        | psc.yrs.dur    | <  | 8.026009582 | Hemoglobin.resultn | =            | Missing     | 0            | 1047 |
| TBILL.resultn  | >= | 0.95        | psc.yrs.dur    | <  | 8.026009582 | Hemoglobin.resultn | <            | 13.75       | -0.0008176   | 1047 |
| TBILL.resultn  | >= | 0.95        | psc.yrs.dur    | <  | 8.026009582 | Hemoglobin.resultn | >=           | 13.75       | -0.002239027 | 1047 |
| TBILL.resultn  | >= | 0.95        | psc.yrs.dur    | >= | 8.026009582 |                    |              | Missing     | 0.002146274  | 1047 |
| ALB.resultn    | =  | Missing     |                |    | Missing     | -0.001484703       | 1048         |             |              |      |
| ALB.resultn    | <  | 2.95        |                |    | Missing     | 0.000201659        | 1048         |             |              |      |
| ALB.resultn    | >= | 2.95        | TBILL.resultn  | =  | Missing     | -0.002247751       | 1048         |             |              |      |
| ALB.resultn    | >= | 2.95        | TBILL.resultn  | <  | 0.85        | -0.002703818       | 1048         |             |              |      |
| ALB.resultn    | >= | 2.95        | TBILL.resultn  | >= | 0.85        | Hemoglobin.resultn | =            | Missing     | 0            | 1048 |
| ALB.resultn    | >= | 2.95        | TBILL.resultn  | >= | 0.85        | Hemoglobin.resultn | <            | 11.85       | -0.001243058 | 1048 |
| ALB.resultn    | >= | 2.95        | TBILL.resultn  | >= | 0.85        | Hemoglobin.resultn | >=           | 11.85       | -0.002051322 | 1048 |
| ALB.resultn    | =  | Missing     |                |    | Missing     | -0.000932346       | 1049         |             |              |      |
| ALB.resultn    | <  | 2.825       |                |    | Missing     | 0.001002862        | 1049         |             |              |      |
| ALB.resultn    | >= | 2.825       | TBILL.resultn  | =  | Missing     | -0.000902581       | 1049         |             |              |      |
| ALB.resultn    | >= | 2.825       | TBILL.resultn  | <  | 2.65        | TBILL.resultn      | =            | Missing     | -0.000891869 | 1049 |
| ALB.resultn    | >= | 2.825       | TBILL.resultn  | <  | 2.65        | TBILL.resultn      | <            | 0.75        | -0.001602207 | 1049 |
| ALB.resultn    | >= | 2.825       | TBILL.resultn  | <  | 2.65        | TBILL.resultn      | >=           | 0.75        | 0            | 1049 |
| ALB.resultn    | >= | 2.825       | TBILL.resultn  | >= | 2.65        |                    |              | Missing     | -0.001083792 | 1049 |
| PLT.resultn    | =  | Missing     |                |    |             | -0.000635466       | 1050         |             |              |      |
| PLT.resultn    | <  | 198.5       | TBILL.resultn  | =  | Missing     | 0.002055105        | 1050         |             |              |      |
| PLT.resultn    | <  | 198.5       | TBILL.resultn  | <  | 1.3         | 0.000893784        | 1050         |             |              |      |
| PLT.resultn    | <  | 198.5       | TBILL.resultn  | >= | 1.3         | 0.004493877        | 1050         |             |              |      |
| PLT.resultn    | >= | 198.5       | Sodium.resultn | =  | Missing     | 0                  | 1050         |             |              |      |
| PLT.resultn    | >= | 198.5       | Sodium.resultn | <  | 138.5       | 0.001198829        | 1050         |             |              |      |
| PLT.resultn    | >= | 198.5       | Sodium.resultn | >= | 138.5       | -0.000191636       | 1050         |             |              |      |
| ALK.times.uln  | =  | Missing     | Sodium.resultn | =  | Missing     | 0                  | 1051         |             |              |      |
| ALK.times.uln  | =  | Missing     | Sodium.resultn | <  | 138.5       | 4.92E-05           | 1051         |             |              |      |
| ALK.times.uln  | =  | Missing     | Sodium.resultn | >= | 138.5       | 0.001957778        | 1051         |             |              |      |
| ALK.times.uln  | <  | 5.963877551 | ALB.resultn    | =  | Missing     | -1.01E-05          | 1051         |             |              |      |
| ALK.times.uln  | <  | 5.963877551 | ALB.resultn    | <  | 3.31        | 0.002399443        | 1051         |             |              |      |
| ALK.times.uln  | <  | 5.963877551 | ALB.resultn    | >= | 3.31        | -1.73E-05          | 1051         |             |              |      |
| ALK.times.uln  | >= | 5.963877551 |                |    |             | 0.002842882        | 1051         |             |              |      |
| ALK.times.uln  | =  | Missing     | ALB.resultn    | =  | Missing     | 0                  | 1052         |             |              |      |
| ALK.times.uln  | =  | Missing     | ALB.resultn    | <  | 3.95        | 0.00170953         | 1052         |             |              |      |
| ALK.times.uln  | =  | Missing     | ALB.resultn    | >= | 3.95        | 8.96E-06           | 1052         |             |              |      |
| ALK.times.uln  | <  | 3.593257185 |                |    |             | 0.000368236        | 1052         |             |              |      |
| ALK.times.uln  | >= | 3.593257185 | PLT.resultn    | =  | Missing     | 0.001902533        | 1052         |             |              |      |
| ALK.times.uln  | >= | 3.593257185 | PLT.resultn    | <  | 249.5       | 0.00376405         | 1052         |             |              |      |
| ALK.times.uln  | >= | 3.593257185 | PLT.resultn    | >= | 249.5       | 0.001043372        | 1052         |             |              |      |
| Sodium.resultn | =  | Missing     |                |    |             | -0.001026571       | 1053         |             |              |      |
| Sodium.resultn | <  | 140.5       | ALK.times.uln  | =  | Missing     | -0.000296108       | 1053         |             |              |      |
| Sodium.resultn | <  | 140.5       | ALK.times.uln  | <  | 2.795652174 | -0.000914997       | 1053         |             |              |      |
| Sodium.resultn | <  | 140.5       | ALK.times.uln  | >= | 2.795652174 | PLT.resultn        | =            | Missing     | 0.000824758  | 1053 |
| Sodium.resultn | <  | 140.5       | ALK.times.uln  | >= | 2.795652174 | PLT.resultn        | <            | 251.5       | 0.002474274  | 1053 |
| Sodium.resultn | <  | 140.5       | ALK.times.uln  | >= | 2.795652174 | PLT.resultn        | >=           | 251.5       | 0            | 1053 |
| Sodium.resultn | >= | 140.5       |                |    |             | Missing            | -0.001257091 | 1053        |              |      |
| age.yrs        | =  | Missing     |                |    | Missing     | -0.001883137       | 1054         |             |              |      |
| age.yrs        | <  | 53.46475017 |                |    | Missing     | -0.002052293       | 1054         |             |              |      |
| age.yrs        | >= | 53.46475017 | AST.resultn    | =  | Missing     | -0.001447144       | 1054         |             |              |      |
| age.yrs        | >= | 53.46475017 | AST.resultn    | <  | 52.5        | -0.002839895       | 1054         |             |              |      |
| age.yrs        | >= | 53.46475017 | AST.resultn    | >= | 52.5        | ALK.times.uln      | =            | Missing     | 0.0001197    | 1054 |
| age.yrs        | >= | 53.46475017 | AST.resultn    | >= | 52.5        | ALK.times.uln      | <            | 3.669437875 | 0.000211776  | 1054 |



|                |    |             |                    |    |             |               |         |             |              |      |
|----------------|----|-------------|--------------------|----|-------------|---------------|---------|-------------|--------------|------|
| age.yrs        | >= | 53.46475017 | AST.resultn        | >= | 52.5        | ALK.times.uln | >=      | 3.669437875 | 0            | 1054 |
| TBILL.resultn  | =  | Missing     |                    |    |             |               |         |             | -0.002397939 | 1055 |
| TBILL.resultn  | <  | 1.65        | ALB.resultn        | =  | Missing     |               |         |             | 0            | 1055 |
| TBILL.resultn  | <  | 1.65        | ALB.resultn        | <  | 3.245       |               |         |             | -0.003200028 | 1055 |
| TBILL.resultn  | <  | 1.65        | ALB.resultn        | >= | 3.245       |               |         |             | -0.002379668 | 1055 |
| TBILL.resultn  | >= | 1.65        | Hemoglobin.resultn | =  | Missing     |               |         |             | -0.00214002  | 1055 |
| TBILL.resultn  | >= | 1.65        | Hemoglobin.resultn | <  | 12.75       |               |         |             | -0.001386377 | 1055 |
| TBILL.resultn  | >= | 1.65        | Hemoglobin.resultn | >= | 12.75       |               |         |             | -0.003183525 | 1055 |
| ALK.times.uln  | =  | Missing     | psc.yrs.dur        | =  | Missing     |               | Missing |             | 0.001070633  | 1056 |
| ALK.times.uln  | =  | Missing     | psc.yrs.dur        | <  | 0.405201916 |               | Missing |             | 0.000229208  | 1056 |
| ALK.times.uln  | =  | Missing     | psc.yrs.dur        | >= | 0.405201916 | ALB.resultn   | =       | Missing     | 0.001624202  | 1056 |
| ALK.times.uln  | =  | Missing     | psc.yrs.dur        | >= | 0.405201916 | ALB.resultn   | <       | 3.95        | 0.003356685  | 1056 |
| ALK.times.uln  | =  | Missing     | psc.yrs.dur        | >= | 0.405201916 | ALB.resultn   | >=      | 3.95        | 0            | 1056 |
| ALK.times.uln  | <  | 5.965616681 |                    |    |             |               | Missing |             | 0.000701723  | 1056 |
| ALK.times.uln  | >= | 5.965616681 |                    |    |             |               | Missing |             | 0.002743364  | 1056 |
| ALK.times.uln  | =  | Missing     | TBILL.resultn      | =  | Missing     |               |         |             | -0.001858732 | 1057 |
| ALK.times.uln  | =  | Missing     | TBILL.resultn      | <  | 1.15        |               |         |             | -0.001832448 | 1057 |
| ALK.times.uln  | =  | Missing     | TBILL.resultn      | >= | 1.15        |               |         |             | 0.00132555   | 1057 |
| ALK.times.uln  | <  | 5.963877551 | TBILL.resultn      | =  | Missing     |               |         |             | -0.001534476 | 1057 |
| ALK.times.uln  | <  | 5.963877551 | TBILL.resultn      | <  | 3.25        |               |         |             | -0.001627474 | 1057 |
| ALK.times.uln  | <  | 5.963877551 | TBILL.resultn      | >= | 3.25        |               |         |             | 0            | 1057 |
| ALK.times.uln  | >= | 5.963877551 |                    |    |             |               |         |             | 0.000961575  | 1057 |
| Sodium.resultn | =  | Missing     |                    |    |             |               | Missing |             | -0.001092914 | 1058 |
| Sodium.resultn | <  | 136.5       |                    |    |             |               | Missing |             | 0.001610818  | 1058 |
| Sodium.resultn | >= | 136.5       | PLT.resultn        | =  | Missing     |               | Missing |             | -0.000472864 | 1058 |
| Sodium.resultn | >= | 136.5       | PLT.resultn        | <  | 185.5       |               | Missing |             | 0.002619691  | 1058 |
| Sodium.resultn | >= | 136.5       | PLT.resultn        | >= | 185.5       | age.yrs       | =       | Missing     | -0.000722997 | 1058 |
| Sodium.resultn | >= | 136.5       | PLT.resultn        | >= | 185.5       | age.yrs       | <       | 49.22655715 | -0.001244654 | 1058 |
| Sodium.resultn | >= | 136.5       | PLT.resultn        | >= | 185.5       | age.yrs       | >=      | 49.22655715 | 0            | 1058 |
| ALB.resultn    | =  | Missing     |                    |    |             |               | Missing |             | -0.000656967 | 1059 |
| ALB.resultn    | <  | 3.735       | PLT.resultn        | =  | Missing     |               | Missing |             | -0.001051774 | 1059 |
| ALB.resultn    | <  | 3.735       | PLT.resultn        | <  | 211         |               | Missing |             | 0.001006873  | 1059 |
| ALB.resultn    | <  | 3.735       | PLT.resultn        | >= | 211         | ALK.times.uln | =       | Missing     | -0.001480659 | 1059 |
| ALB.resultn    | <  | 3.735       | PLT.resultn        | >= | 211         | ALK.times.uln | <       | 5.728910445 | -0.002023567 | 1059 |
| ALB.resultn    | <  | 3.735       | PLT.resultn        | >= | 211         | ALK.times.uln | >=      | 5.728910445 | 0            | 1059 |
| ALB.resultn    | >= | 3.735       |                    |    |             |               | Missing |             | -0.001623317 | 1059 |
| Sodium.resultn | =  | Missing     | TBILL.resultn      | =  | Missing     |               |         |             | -0.000399638 | 1060 |
| Sodium.resultn | =  | Missing     | TBILL.resultn      | <  | 1.25        |               |         |             | -0.000779646 | 1060 |
| Sodium.resultn | =  | Missing     | TBILL.resultn      | >= | 1.25        |               |         |             | 0.001204841  | 1060 |
| Sodium.resultn | <  | 136.5       |                    |    |             |               |         |             | 0.002643476  | 1060 |
| Sodium.resultn | >= | 136.5       | ALB.resultn        | =  | Missing     |               |         |             | -1.11E-05    | 1060 |
| Sodium.resultn | >= | 136.5       | ALB.resultn        | <  | 3.45        |               |         |             | -6.74E-05    | 1060 |
| Sodium.resultn | >= | 136.5       | ALB.resultn        | >= | 3.45        |               |         |             | 0            | 1060 |
| TBILL.resultn  | =  | Missing     |                    |    |             |               |         |             | -0.002472352 | 1061 |
| TBILL.resultn  | <  | 1.95        | age.yrs            | =  | Missing     |               |         |             | -0.001626328 | 1061 |
| TBILL.resultn  | <  | 1.95        | age.yrs            | <  | 55.62628337 |               |         |             | -0.002028012 | 1061 |
| TBILL.resultn  | <  | 1.95        | age.yrs            | >= | 55.62628337 |               |         |             | 0            | 1061 |
| TBILL.resultn  | >= | 1.95        | Hemoglobin.resultn | =  | Missing     |               |         |             | -0.001197554 | 1061 |
| TBILL.resultn  | >= | 1.95        | Hemoglobin.resultn | <  | 12.95       |               |         |             | -0.000724321 | 1061 |
| TBILL.resultn  | >= | 1.95        | Hemoglobin.resultn | >= | 12.95       |               |         |             | -0.001603183 | 1061 |
| TBILL.resultn  | =  | Missing     |                    |    |             |               | Missing |             | -0.000742535 | 1062 |
| TBILL.resultn  | <  | 2.35        | ALK.times.uln      | =  | Missing     | age.yrs       | =       | Missing     | -0.001277051 | 1062 |
| TBILL.resultn  | <  | 2.35        | ALK.times.uln      | =  | Missing     | age.yrs       | <       | 53.55509925 | -0.002069703 | 1062 |
| TBILL.resultn  | <  | 2.35        | ALK.times.uln      | =  | Missing     | age.yrs       | >=      | 53.55509925 | 0            | 1062 |
| TBILL.resultn  | <  | 2.35        | ALK.times.uln      | <  | 5.963877551 |               | Missing |             | -0.00168314  | 1062 |
| TBILL.resultn  | <  | 2.35        | ALK.times.uln      | >= | 5.963877551 |               | Missing |             | 0.001108901  | 1062 |
| TBILL.resultn  | >= | 2.35        |                    |    |             |               | Missing |             | -0.00022728  | 1062 |
| ALK.times.uln  | =  | Missing     | ALB.resultn        | =  | Missing     |               |         |             | 0            | 1063 |
| ALK.times.uln  | =  | Missing     | ALB.resultn        | <  | 3.95        |               |         |             | 0.002531667  | 1063 |
| ALK.times.uln  | =  | Missing     | ALB.resultn        | >= | 3.95        |               |         |             | 1.12E-05     | 1063 |
| ALK.times.uln  | <  | 5.462893197 |                    |    |             |               |         |             | 0.000583913  | 1063 |
| ALK.times.uln  | >= | 5.462893197 | ALK.times.uln      | =  | Missing     |               |         |             | 0.002224234  | 1063 |

|                |    |             |               |    |             |               |              |              |              |      |
|----------------|----|-------------|---------------|----|-------------|---------------|--------------|--------------|--------------|------|
| ALK.times.uln  | >= | 5.462893197 | ALK.times.uln | <  | 7.4286935   |               | 0.003807765  | 1063         |              |      |
| ALK.times.uln  | >= | 5.462893197 | ALK.times.uln | >= | 7.4286935   |               | 0.001006134  | 1063         |              |      |
| ALB.resultn    | =  | Missing     |               |    |             | Missing       | -0.002224644 | 1064         |              |      |
| ALB.resultn    | <  | 2.915       |               |    |             | Missing       | -0.000475041 | 1064         |              |      |
| ALB.resultn    | >= | 2.915       | psc.yrs.dur   | =  | Missing     | Missing       | -0.002689541 | 1064         |              |      |
| ALB.resultn    | >= | 2.915       | psc.yrs.dur   | <  | 6.410677618 | Missing       | -0.002776085 | 1064         |              |      |
| ALB.resultn    | >= | 2.915       | psc.yrs.dur   | >= | 6.410677618 | AST.resultn   | =            | Missing      | -0.002111549 | 1064 |
| ALB.resultn    | >= | 2.915       | psc.yrs.dur   | >= | 6.410677618 | AST.resultn   | <            | 65           | -0.003284632 | 1064 |
| ALB.resultn    | >= | 2.915       | psc.yrs.dur   | >= | 6.410677618 | AST.resultn   | >=           | 65           | 0            | 1064 |
| age.yrs        | =  | Missing     |               |    |             | Missing       | -0.003441646 | 1065         |              |      |
| age.yrs        | <  | 49.41957563 |               |    |             | Missing       | -0.003783374 | 1065         |              |      |
| age.yrs        | >= | 49.41957563 | AST.resultn   | =  | Missing     | Missing       | -0.002698386 | 1065         |              |      |
| age.yrs        | >= | 49.41957563 | AST.resultn   | <  | 54.5        | Missing       | -0.004127354 | 1065         |              |      |
| age.yrs        | >= | 49.41957563 | AST.resultn   | >= | 54.5        | TBILL.resultn | =            | Missing      | -0.001150337 | 1065 |
| age.yrs        | >= | 49.41957563 | AST.resultn   | >= | 54.5        | TBILL.resultn | <            | 0.95         | -0.002684121 | 1065 |
| age.yrs        | >= | 49.41957563 | AST.resultn   | >= | 54.5        | TBILL.resultn | >=           | 0.95         | 0            | 1065 |
| PLT.resultn    | =  | Missing     |               |    |             | Missing       | -0.001105728 | 1066         |              |      |
| PLT.resultn    | <  | 181         |               |    |             | Missing       | 0.002245417  | 1066         |              |      |
| PLT.resultn    | >= | 181         | ALK.times.uln | =  | Missing     | Missing       | -0.001145854 | 1066         |              |      |
| PLT.resultn    | >= | 181         | ALK.times.uln | <  | 5.963877551 | psc.yrs.dur   | =            | Missing      | -0.001276691 | 1066 |
| PLT.resultn    | >= | 181         | ALK.times.uln | <  | 5.963877551 | psc.yrs.dur   | <            | 2.05065024   | -0.001650894 | 1066 |
| PLT.resultn    | >= | 181         | ALK.times.uln | <  | 5.963877551 | psc.yrs.dur   | >=           | 2.05065024   | 0            | 1066 |
| PLT.resultn    | >= | 181         | ALK.times.uln | >= | 5.963877551 |               | Missing      | 0.000247187  | 1066         |      |
| Sodium.resultn | =  | Missing     | ALK.times.uln | =  | Missing     |               | 0            | 1067         |              |      |
| Sodium.resultn | =  | Missing     | ALK.times.uln | <  | 1.221024699 |               | 0.00267313   | 1067         |              |      |
| Sodium.resultn | =  | Missing     | ALK.times.uln | >= | 1.221024699 |               | -1.77E-05    | 1067         |              |      |
| Sodium.resultn | <  | 137.5       | AST.resultn   | =  | Missing     |               | 0.00394373   | 1067         |              |      |
| Sodium.resultn | <  | 137.5       | AST.resultn   | <  | 65.5        |               | 0.00838211   | 1067         |              |      |
| Sodium.resultn | <  | 137.5       | AST.resultn   | >= | 65.5        |               | 0.000688918  | 1067         |              |      |
| Sodium.resultn | >= | 137.5       |               |    |             |               | 0.000702936  | 1067         |              |      |
| TBILL.resultn  | =  | Missing     |               |    |             | Missing       | 0.000247859  | 1068         |              |      |
| TBILL.resultn  | <  | 2.85        | age.yrs       | =  | Missing     | Missing       | 0.000238851  | 1068         |              |      |
| TBILL.resultn  | <  | 2.85        | age.yrs       | <  | 69.84257358 | PLT.resultn   | =            | Missing      | 0            | 1068 |
| TBILL.resultn  | <  | 2.85        | age.yrs       | <  | 69.84257358 | PLT.resultn   | <            | 197.5        | 0.001093322  | 1068 |
| TBILL.resultn  | <  | 2.85        | age.yrs       | <  | 69.84257358 | PLT.resultn   | >=           | 197.5        | -0.000191862 | 1068 |
| TBILL.resultn  | <  | 2.85        | age.yrs       | >= | 69.84257358 |               | Missing      | 0.002963605  | 1068         |      |
| TBILL.resultn  | >= | 2.85        |               |    |             | Missing       | 0.001588859  | 1068         |              |      |
| ALK.times.uln  | =  | Missing     | TBILL.resultn | =  | Missing     |               | 0            | 1069         |              |      |
| ALK.times.uln  | =  | Missing     | TBILL.resultn | <  | 1.15        |               | 2.06E-05     | 1069         |              |      |
| ALK.times.uln  | =  | Missing     | TBILL.resultn | >= | 1.15        |               | 0.00189787   | 1069         |              |      |
| ALK.times.uln  | <  | 5.462893197 |               |    |             |               | 0.000689751  | 1069         |              |      |
| ALK.times.uln  | >= | 5.462893197 | ALK.times.uln | =  | Missing     |               | 0.002131426  | 1069         |              |      |
| ALK.times.uln  | >= | 5.462893197 | ALK.times.uln | <  | 7.801810865 |               | 0.003619546  | 1069         |              |      |
| ALK.times.uln  | >= | 5.462893197 | ALK.times.uln | >= | 7.801810865 |               | 0.000643306  | 1069         |              |      |
| TBILL.resultn  | =  | Missing     |               |    |             | Missing       | -0.005090966 | 1070         |              |      |
| TBILL.resultn  | <  | 0.85        |               |    |             | Missing       | -0.005088692 | 1070         |              |      |
| TBILL.resultn  | >= | 0.85        | PLT.resultn   | =  | Missing     | Missing       | -0.003511361 | 1070         |              |      |
| TBILL.resultn  | >= | 0.85        | PLT.resultn   | <  | 219         | AST.resultn   | =            | Missing      | -0.002073016 | 1070 |
| TBILL.resultn  | >= | 0.85        | PLT.resultn   | <  | 219         | AST.resultn   | <            | 52.5         | -0.005088313 | 1070 |
| TBILL.resultn  | >= | 0.85        | PLT.resultn   | <  | 219         | AST.resultn   | >=           | 52.5         | 0            | 1070 |
| TBILL.resultn  | >= | 0.85        | PLT.resultn   | >= | 219         |               | Missing      | -0.004043352 | 1070         |      |
| ALB.resultn    | =  | Missing     |               |    |             | Missing       | 0.000515367  | 1071         |              |      |
| ALB.resultn    | <  | 2.89        |               |    |             | Missing       | 0.00186969   | 1071         |              |      |
| ALB.resultn    | >= | 2.89        | psc.yrs.dur   | =  | Missing     | Missing       | 0.000195955  | 1071         |              |      |
| ALB.resultn    | >= | 2.89        | psc.yrs.dur   | <  | 13.02121834 | ALB.resultn   | =            | Missing      | -7.80E-06    | 1071 |
| ALB.resultn    | >= | 2.89        | psc.yrs.dur   | <  | 13.02121834 | ALB.resultn   | <            | 3.135        | -0.000146749 | 1071 |
| ALB.resultn    | >= | 2.89        | psc.yrs.dur   | <  | 13.02121834 | ALB.resultn   | >=           | 3.135        | 0            | 1071 |
| ALB.resultn    | >= | 2.89        | psc.yrs.dur   | >= | 13.02121834 |               | Missing      | 0.004413645  | 1071         |      |
| TBILL.resultn  | =  | Missing     |               |    |             | Missing       | -0.001127455 | 1072         |              |      |
| TBILL.resultn  | <  | 1.25        |               |    |             | Missing       | -0.000603208 | 1072         |              |      |
| TBILL.resultn  | >= | 1.25        | age.yrs       | =  | Missing     | Missing       | 5.27E-05     | 1072         |              |      |
| TBILL.resultn  | >= | 1.25        | age.yrs       | <  | 54.30527036 | PLT.resultn   | =            | Missing      | -0.000345735 | 1072 |

|                    |    |                                |               |                         |         |             |              |        |
|--------------------|----|--------------------------------|---------------|-------------------------|---------|-------------|--------------|--------|
| TBILI.resultn      | >= | 1.25 age.yrs                   | <             | 54.30527036 PLT.resultn | <       | 261         | -0.000720282 | 1072   |
| TBILI.resultn      | >= | 1.25 age.yrs                   | <             | 54.30527036 PLT.resultn | >=      | 261         |              | 0 1072 |
| TBILI.resultn      | >= | 1.25 age.yrs                   | >=            | 54.30527036             |         | Missing     | 0.001703329  | 1072   |
| ALB.resultn        | =  | Missing                        |               |                         |         | Missing     | -0.00237543  | 1073   |
| ALB.resultn        | <  | 2.915                          |               |                         |         | Missing     | -0.000284885 | 1073   |
| ALB.resultn        | >= | 2.915 TBILI.resultn            | =             | Missing                 |         | Missing     | -0.001766916 | 1073   |
| ALB.resultn        | >= | 2.915 TBILI.resultn            | <             | 0.75                    |         | Missing     | -0.002382238 | 1073   |
| ALB.resultn        | >= | 2.915 TBILI.resultn            | >=            | 0.75 Hemoglobin.resultn | =       | Missing     |              | 0 1073 |
| ALB.resultn        | >= | 2.915 TBILI.resultn            | >=            | 0.75 Hemoglobin.resultn | <       | 13.75       | -0.000937707 | 1073   |
| ALB.resultn        | >= | 2.915 TBILI.resultn            | >=            | 0.75 Hemoglobin.resultn | >=      | 13.75       | -0.00193793  | 1073   |
| Hemoglobin.resultn | =  | Missing                        | ALB.resultn   | =                       | Missing |             | -0.000107347 | 1074   |
| Hemoglobin.resultn | =  | Missing                        | ALB.resultn   | <                       | 3.95    |             | 0.002143938  | 1074   |
| Hemoglobin.resultn | =  | Missing                        | ALB.resultn   | >=                      | 3.95    |             | -0.000985898 | 1074   |
| Hemoglobin.resultn | <  | 13.75 ALK.times.uln            | =             | Missing                 |         |             | -0.000882098 | 1074   |
| Hemoglobin.resultn | <  | 13.75 ALK.times.uln            | <             | 5.965616681             |         |             | -0.001029114 | 1074   |
| Hemoglobin.resultn | <  | 13.75 ALK.times.uln            | >=            | 5.965616681             |         |             |              | 0 1074 |
| Hemoglobin.resultn | >= | 13.75                          |               |                         |         |             | -0.001574659 | 1074   |
| TBILI.resultn      | =  | Missing                        |               |                         |         |             | -0.000451389 | 1075   |
| TBILI.resultn      | <  | 2.45 age.yrs                   | =             | Missing                 |         |             | -0.001486426 | 1075   |
| TBILI.resultn      | <  | 2.45 age.yrs                   | <             | 63.30047912             |         |             | -0.001649003 | 1075   |
| TBILI.resultn      | <  | 2.45 age.yrs                   | >=            | 63.30047912             |         |             |              | 0 1075 |
| TBILI.resultn      | >= | 2.45 PLT.resultn               | =             | Missing                 |         |             | -0.000413539 | 1075   |
| TBILI.resultn      | >= | 2.45 PLT.resultn               | <             | 249.5                   |         |             | 0.000119878  | 1075   |
| TBILI.resultn      | >= | 2.45 PLT.resultn               | >=            | 249.5                   |         |             | -0.001053639 | 1075   |
| ALK.times.uln      | =  | Missing                        | ALB.resultn   | =                       | Missing |             | -0.001092209 | 1076   |
| ALK.times.uln      | =  | Missing                        | ALB.resultn   | <                       | 3.65    |             | 0.003005054  | 1076   |
| ALK.times.uln      | =  | Missing                        | ALB.resultn   | >=                      | 3.65    |             | -0.001000059 | 1076   |
| ALK.times.uln      | <  | 5.963877551 Hemoglobin.resultn | =             | Missing                 |         |             |              | 0 1076 |
| ALK.times.uln      | <  | 5.963877551 Hemoglobin.resultn | <             | 11.2                    |         |             | 0.002030776  | 1076   |
| ALK.times.uln      | <  | 5.963877551 Hemoglobin.resultn | >=            | 11.2                    |         |             | -0.001082929 | 1076   |
| ALK.times.uln      | >= | 5.963877551                    |               |                         |         |             | 0.001469394  | 1076   |
| TBILI.resultn      | =  | Missing                        |               |                         |         | Missing     | -0.003982262 | 1077   |
| TBILI.resultn      | <  | 3.5 ALK.times.uln              | =             | Missing                 |         | Missing     | -0.003621122 | 1077   |
| TBILI.resultn      | <  | 3.5 ALK.times.uln              | <             | 5.438574341 age.yrs     | =       | Missing     | -0.003583823 | 1077   |
| TBILI.resultn      | <  | 3.5 ALK.times.uln              | <             | 5.438574341 age.yrs     | <       | 69.51266256 | -0.003819601 | 1077   |
| TBILI.resultn      | <  | 3.5 ALK.times.uln              | <             | 5.438574341 age.yrs     | >=      | 69.51266256 |              | 0 1077 |
| TBILI.resultn      | <  | 3.5 ALK.times.uln              | >=            | 5.438574341             |         | Missing     | -0.001338616 | 1077   |
| TBILI.resultn      | >= | 3.5                            |               |                         |         | Missing     | -0.001927422 | 1077   |
| psc.yrs.dur        | =  | Missing                        |               |                         |         |             | 0.000823522  | 1078   |
| psc.yrs.dur        | <  | 1.890485969 PLT.resultn        | =             | Missing                 |         |             |              | 0 1078 |
| psc.yrs.dur        | <  | 1.890485969 PLT.resultn        | <             | 185                     |         |             | 0.002707719  | 1078   |
| psc.yrs.dur        | <  | 1.890485969 PLT.resultn        | >=            | 185                     |         |             | 0.000247009  | 1078   |
| psc.yrs.dur        | >= | 1.890485969 Sodium.resultn     | =             | Missing                 |         |             | 0.001492702  | 1078   |
| psc.yrs.dur        | >= | 1.890485969 Sodium.resultn     | <             | 138.5                   |         |             | 0.004546923  | 1078   |
| psc.yrs.dur        | >= | 1.890485969 Sodium.resultn     | >=            | 138.5                   |         |             | 0.001005911  | 1078   |
| ALK.times.uln      | =  | Missing                        | TBILI.resultn | =                       | Missing |             | -0.00249053  | 1079   |
| ALK.times.uln      | =  | Missing                        | TBILI.resultn | <                       | 1.55    |             | -0.002202676 | 1079   |
| ALK.times.uln      | =  | Missing                        | TBILI.resultn | >=                      | 1.55    |             | -0.000820395 | 1079   |
| ALK.times.uln      | <  | 5.857962963 ALB.resultn        | =             | Missing                 |         |             |              | 0 1079 |
| ALK.times.uln      | <  | 5.857962963 ALB.resultn        | <             | 4.25                    |         |             | -0.002199322 | 1079   |
| ALK.times.uln      | <  | 5.857962963 ALB.resultn        | >=            | 4.25                    |         |             | -0.001303727 | 1079   |
| ALK.times.uln      | >= | 5.857962963                    |               |                         |         |             | 0.000104579  | 1079   |
| ALB.resultn        | =  | Missing                        |               |                         |         |             | 4.29E-05     | 1080   |
| ALB.resultn        | <  | 3.34 TBILI.resultn             | =             | Missing                 |         |             | 0.001636811  | 1080   |
| ALB.resultn        | <  | 3.34 TBILI.resultn             | <             | 1.6                     |         |             | 0.001015522  | 1080   |
| ALB.resultn        | <  | 3.34 TBILI.resultn             | >=            | 1.6                     |         |             | 0.002630872  | 1080   |
| ALB.resultn        | >= | 3.34 AST.resultn               | =             | Missing                 |         |             | 0.000840271  | 1080   |
| ALB.resultn        | >= | 3.34 AST.resultn               | <             | 112.5                   |         |             | 0.001032622  | 1080   |
| ALB.resultn        | >= | 3.34 AST.resultn               | >=            | 112.5                   |         |             |              | 0 1080 |
| ALB.resultn        | =  | Missing                        |               |                         |         | Missing     | -0.004129826 | 1081   |
| ALB.resultn        | <  | 2.95                           |               |                         |         | Missing     | -0.002573555 | 1081   |
| ALB.resultn        | >= | 2.95 psc.yrs.dur               | =             | Missing                 |         | Missing     | -0.004109401 | 1081   |

|                |    |                  |                |             |             |                    |              |              |              |      |
|----------------|----|------------------|----------------|-------------|-------------|--------------------|--------------|--------------|--------------|------|
| ALB.resultn    | >= | 2.95 psc.yrs.dur | <              | 6.258726899 |             | Missing            | -0.004296185 | 1081         |              |      |
| ALB.resultn    | >= | 2.95 psc.yrs.dur | >=             | 6.258726899 | AST.resultn | =                  | Missing      | -0.002501443 | 1081         |      |
| ALB.resultn    | >= | 2.95 psc.yrs.dur | >=             | 6.258726899 | AST.resultn | <                  | 47           | -0.004794432 | 1081         |      |
| ALB.resultn    | >= | 2.95 psc.yrs.dur | >=             | 6.258726899 | AST.resultn | >=                 | 47           | 0            | 1081         |      |
| ALK.times.uln  | =  | Missing          |                |             |             | Missing            | -0.001497711 | 1082         |              |      |
| ALK.times.uln  | <  | 6.115825908      | Sodium.resultn | =           | Missing     | TBILL.resultn      | =            | Missing      | -0.00178213  | 1082 |
| ALK.times.uln  | <  | 6.115825908      | Sodium.resultn | =           | Missing     | TBILL.resultn      | <            | 1.15         | -0.00216955  | 1082 |
| ALK.times.uln  | <  | 6.115825908      | Sodium.resultn | =           | Missing     | TBILL.resultn      | >=           | 1.15         | 0            | 1082 |
| ALK.times.uln  | <  | 6.115825908      | Sodium.resultn | <           | 137.5       |                    | Missing      | 0.000486809  | 1082         |      |
| ALK.times.uln  | <  | 6.115825908      | Sodium.resultn | >=          | 137.5       |                    | Missing      | -0.001739024 | 1082         |      |
| ALK.times.uln  | >= | 6.115825908      |                |             |             | Missing            | 1.18E-05     | 1082         |              |      |
| ALB.resultn    | =  | Missing          |                |             |             | Missing            | -0.000842106 | 1083         |              |      |
| ALB.resultn    | <  | 2.965            |                |             |             | Missing            | 0.000834385  | 1083         |              |      |
| ALB.resultn    | >= | 2.965            | TBILL.resultn  | =           | Missing     |                    | Missing      | -0.000746166 | 1083         |      |
| ALB.resultn    | >= | 2.965            | TBILL.resultn  | <           | 2.75        | AST.resultn        | =            | Missing      | -0.000709593 | 1083 |
| ALB.resultn    | >= | 2.965            | TBILL.resultn  | <           | 2.75        | AST.resultn        | <            | 47.5         | -0.001507886 | 1083 |
| ALB.resultn    | >= | 2.965            | TBILL.resultn  | <           | 2.75        | AST.resultn        | >=           | 47.5         | 0            | 1083 |
| ALB.resultn    | >= | 2.965            | TBILL.resultn  | >=          | 2.75        |                    | Missing      | -0.001503221 | 1083         |      |
| ALK.times.uln  | =  | Missing          | ALB.resultn    | =           | Missing     |                    |              | -0.000438182 | 1084         |      |
| ALK.times.uln  | =  | Missing          | ALB.resultn    | <           | 3.95        |                    |              | 0.001490137  | 1084         |      |
| ALK.times.uln  | =  | Missing          | ALB.resultn    | >=          | 3.95        |                    |              | 7.82E-05     | 1084         |      |
| ALK.times.uln  | <  | 5.963877551      | Sodium.resultn | =           | Missing     |                    |              | 0            | 1084         |      |
| ALK.times.uln  | <  | 5.963877551      | Sodium.resultn | <           | 138.5       |                    |              | 0.0012539    | 1084         |      |
| ALK.times.uln  | <  | 5.963877551      | Sodium.resultn | >=          | 138.5       |                    |              | -0.00025878  | 1084         |      |
| ALK.times.uln  | >= | 5.963877551      |                |             |             |                    |              | 0.001801308  | 1084         |      |
| ALB.resultn    | =  | Missing          |                |             |             | Missing            | -0.001855254 | 1085         |              |      |
| ALB.resultn    | <  | 2.95             |                |             |             | Missing            | 1.69E-05     | 1085         |              |      |
| ALB.resultn    | >= | 2.95             | psc.yrs.dur    | =           | Missing     |                    | Missing      | -0.002094639 | 1085         |      |
| ALB.resultn    | >= | 2.95             | psc.yrs.dur    | <           | 8.020533881 |                    | Missing      | -0.002214958 | 1085         |      |
| ALB.resultn    | >= | 2.95             | psc.yrs.dur    | >=          | 8.020533881 | TBILL.resultn      | =            | Missing      | -0.001322943 | 1085 |
| ALB.resultn    | >= | 2.95             | psc.yrs.dur    | >=          | 8.020533881 | TBILL.resultn      | <            | 0.95         | -0.002557689 | 1085 |
| ALB.resultn    | >= | 2.95             | psc.yrs.dur    | >=          | 8.020533881 | TBILL.resultn      | >=           | 0.95         | 0            | 1085 |
| Sodium.resultn | =  | Missing          |                |             |             | Missing            | -0.000661645 | 1086         |              |      |
| Sodium.resultn | <  | 136.5            |                |             |             | Missing            | 0.003518393  | 1086         |              |      |
| Sodium.resultn | >= | 136.5            | ALB.resultn    | =           | Missing     |                    | Missing      | -2.39E-05    | 1086         |      |
| Sodium.resultn | >= | 136.5            | ALB.resultn    | <           | 3.35        | Hemoglobin.resultn | =            | Missing      | 0.000673261  | 1086 |
| Sodium.resultn | >= | 136.5            | ALB.resultn    | <           | 3.35        | Hemoglobin.resultn | <            | 11.8         | 0.001346523  | 1086 |
| Sodium.resultn | >= | 136.5            | ALB.resultn    | <           | 3.35        | Hemoglobin.resultn | >=           | 11.8         | 0            | 1086 |
| Sodium.resultn | >= | 136.5            | ALB.resultn    | >=          | 3.35        |                    | Missing      | -0.000171297 | 1086         |      |
| ALB.resultn    | =  | Missing          |                |             |             | Missing            | -1.30E-05    | 1087         |              |      |
| ALB.resultn    | <  | 2.915            |                |             |             | Missing            | 0.002911851  | 1087         |              |      |
| ALB.resultn    | >= | 2.915            | psc.yrs.dur    | =           | Missing     |                    | Missing      | 0.000773203  | 1087         |      |
| ALB.resultn    | >= | 2.915            | psc.yrs.dur    | <           | 12.8569473  | Sodium.resultn     | =            | Missing      | 0            | 1087 |
| ALB.resultn    | >= | 2.915            | psc.yrs.dur    | <           | 12.8569473  | Sodium.resultn     | <            | 137.5        | 0.00216837   | 1087 |
| ALB.resultn    | >= | 2.915            | psc.yrs.dur    | <           | 12.8569473  | Sodium.resultn     | >=           | 137.5        | 0.000544375  | 1087 |
| ALB.resultn    | >= | 2.915            | psc.yrs.dur    | >=          | 12.8569473  |                    | Missing      | 0.00462558   | 1087         |      |
| ALB.resultn    | =  | Missing          |                |             |             | Missing            | -0.000527527 | 1088         |              |      |
| ALB.resultn    | <  | 2.875            |                |             |             | Missing            | 0.001201747  | 1088         |              |      |
| ALB.resultn    | >= | 2.875            | TBILL.resultn  | =           | Missing     |                    | Missing      | -0.000853098 | 1088         |      |
| ALB.resultn    | >= | 2.875            | TBILL.resultn  | <           | 2.8         | TBILL.resultn      | =            | Missing      | -0.000819613 | 1088 |
| ALB.resultn    | >= | 2.875            | TBILL.resultn  | <           | 2.8         | TBILL.resultn      | <            | 0.75         | -0.001544093 | 1088 |
| ALB.resultn    | >= | 2.875            | TBILL.resultn  | <           | 2.8         | TBILL.resultn      | >=           | 0.75         | 0            | 1088 |
| ALB.resultn    | >= | 2.875            | TBILL.resultn  | >=          | 2.8         |                    | Missing      | -0.001559618 | 1088         |      |
| age.yrs        | =  | Missing          |                |             |             |                    | -0.000193898 | 1089         |              |      |
| age.yrs        | <  | 62.40930869      | TBILL.resultn  | =           | Missing     |                    | 0            | 1089         |              |      |
| age.yrs        | <  | 62.40930869      | TBILL.resultn  | <           | 2.35        |                    | -0.00054735  | 1089         |              |      |
| age.yrs        | <  | 62.40930869      | TBILL.resultn  | >=          | 2.35        |                    | 0.000380295  | 1089         |              |      |
| age.yrs        | >= | 62.40930869      | psc.yrs.dur    | =           | Missing     |                    | 0.001259205  | 1089         |              |      |
| age.yrs        | >= | 62.40930869      | psc.yrs.dur    | <           | 0.774811773 |                    | -0.00043442  | 1089         |              |      |
| age.yrs        | >= | 62.40930869      | psc.yrs.dur    | >=          | 0.774811773 |                    | 0.004255618  | 1089         |              |      |
| TBILL.resultn  | =  | Missing          |                |             |             |                    | 0.0019473    | 1090         |              |      |
| TBILL.resultn  | <  | 1.65             | ALK.times.uln  | =           | Missing     |                    | 0            | 1090         |              |      |

|                |    |                         |    |                          |    |             |              |      |
|----------------|----|-------------------------|----|--------------------------|----|-------------|--------------|------|
| TBILL.resultn  | <  | 1.65 ALK.times.uln      | <  | 3.920665165              |    |             | 0.00067972   | 1090 |
| TBILL.resultn  | <  | 1.65 ALK.times.uln      | >= | 3.920665165              |    |             | -6.39E-06    | 1090 |
| TBILL.resultn  | >= | 1.65 Hemoglobin.resultn | =  | Missing                  |    |             | 0.001240681  | 1090 |
| TBILL.resultn  | >= | 1.65 Hemoglobin.resultn | <  | 12.75                    |    |             | 0.002580564  | 1090 |
| TBILL.resultn  | >= | 1.65 Hemoglobin.resultn | >= | 12.75                    |    |             | -9.88E-06    | 1090 |
| age.yrs        | =  | Missing                 |    |                          |    | Missing     | -0.000265006 | 1091 |
| age.yrs        | <  | 49.41957563             |    |                          |    | Missing     | -0.000516563 | 1091 |
| age.yrs        | >= | 49.41957563 AST.resultn | =  | Missing                  |    | Missing     | 0.00015602   | 1091 |
| age.yrs        | >= | 49.41957563 AST.resultn | <  | 51.5                     |    | Missing     | -0.000902819 | 1091 |
| age.yrs        | >= | 49.41957563 AST.resultn | >= | 51.5 PLT.resultn         | =  | Missing     | 0.001192331  | 1091 |
| age.yrs        | >= | 49.41957563 AST.resultn | >= | 51.5 PLT.resultn         | <  | 257         | 0.001745913  | 1091 |
| age.yrs        | >= | 49.41957563 AST.resultn | >= | 51.5 PLT.resultn         | >= | 257         | 0            | 1091 |
| ALB.resultn    | =  | Missing                 |    |                          |    | Missing     | -0.002813525 | 1092 |
| ALB.resultn    | <  | 3.03                    |    |                          |    | Missing     | -0.000417074 | 1092 |
| ALB.resultn    | >= | 3.03 TBILL.resultn      | =  | Missing                  |    | Missing     | -0.002157359 | 1092 |
| ALB.resultn    | >= | 3.03 TBILL.resultn      | <  | 0.75                     |    | Missing     | -0.002806241 | 1092 |
| ALB.resultn    | >= | 3.03 TBILL.resultn      | >= | 0.75 Hemoglobin.resultn  | =  | Missing     | 0            | 1092 |
| ALB.resultn    | >= | 3.03 TBILL.resultn      | >= | 0.75 Hemoglobin.resultn  | <  | 13.25       | -0.002061889 | 1092 |
| ALB.resultn    | >= | 3.03 TBILL.resultn      | >= | 0.75 Hemoglobin.resultn  | >= | 13.25       | -0.001753872 | 1092 |
| TBILL.resultn  | =  | Missing                 |    |                          |    | Missing     | -0.002379802 | 1093 |
| TBILL.resultn  | <  | 2.75 AST.resultn        | =  | Missing                  |    | Missing     | -0.001692798 | 1093 |
| TBILL.resultn  | <  | 2.75 AST.resultn        | <  | 44                       |    | Missing     | -0.002373476 | 1093 |
| TBILL.resultn  | <  | 2.75 AST.resultn        | >= | 44 Hemoglobin.resultn    | =  | Missing     | 0            | 1093 |
| TBILL.resultn  | <  | 2.75 AST.resultn        | >= | 44 Hemoglobin.resultn    | <  | 13.85       | -0.000577911 | 1093 |
| TBILL.resultn  | <  | 2.75 AST.resultn        | >= | 44 Hemoglobin.resultn    | >= | 13.85       | -0.002072669 | 1093 |
| TBILL.resultn  | >= | 2.75                    |    |                          |    | Missing     | -0.000352731 | 1093 |
| Sodium.resultn | =  | Missing                 |    |                          |    | Missing     | -0.001157903 | 1094 |
| Sodium.resultn | <  | 138.5 TBILL.resultn     | =  | Missing                  |    | Missing     | 0.00072802   | 1094 |
| Sodium.resultn | <  | 138.5 TBILL.resultn     | <  | 0.75                     |    | Missing     | -0.001375879 | 1094 |
| Sodium.resultn | <  | 138.5 TBILL.resultn     | >= | 0.75 AST.resultn         | =  | Missing     | 0.002080527  | 1094 |
| Sodium.resultn | <  | 138.5 TBILL.resultn     | >= | 0.75 AST.resultn         | <  | 67.5        | 0.005825475  | 1094 |
| Sodium.resultn | <  | 138.5 TBILL.resultn     | >= | 0.75 AST.resultn         | >= | 67.5        | 0            | 1094 |
| Sodium.resultn | >= | 138.5                   |    |                          |    | Missing     | -0.000536445 | 1094 |
| age.yrs        | =  | Missing                 |    |                          |    | Missing     | 0.00100652   | 1095 |
| age.yrs        | <  | 71.28678987 PLT.resultn | =  | Missing                  |    | Missing     | 0.00071031   | 1095 |
| age.yrs        | <  | 71.28678987 PLT.resultn | <  | 204.5 Hemoglobin.resultn | =  | Missing     | 0.001384287  | 1095 |
| age.yrs        | <  | 71.28678987 PLT.resultn | <  | 204.5 Hemoglobin.resultn | <  | 14.1        | 0.003322288  | 1095 |
| age.yrs        | <  | 71.28678987 PLT.resultn | <  | 204.5 Hemoglobin.resultn | >= | 14.1        | 0            | 1095 |
| age.yrs        | <  | 71.28678987 PLT.resultn | >= | 204.5                    |    | Missing     | 0.000639955  | 1095 |
| age.yrs        | >= | 71.28678987             |    |                          |    | Missing     | 0.007378893  | 1095 |
| TBILL.resultn  | =  | Missing                 |    |                          |    | Missing     | -0.002962661 | 1096 |
| TBILL.resultn  | <  | 2.35 age.yrs            | =  | Missing                  |    | Missing     | -0.002483607 | 1096 |
| TBILL.resultn  | <  | 2.35 age.yrs            | <  | 53.44969199              |    | Missing     | -0.002779962 | 1096 |
| TBILL.resultn  | <  | 2.35 age.yrs            | >= | 53.44969199 AST.resultn  | =  | Missing     | -0.001765172 | 1096 |
| TBILL.resultn  | <  | 2.35 age.yrs            | >= | 53.44969199 AST.resultn  | <  | 51.5        | -0.002912534 | 1096 |
| TBILL.resultn  | <  | 2.35 age.yrs            | >= | 53.44969199 AST.resultn  | >= | 51.5        | 0            | 1096 |
| TBILL.resultn  | >= | 2.35                    |    |                          |    | Missing     | -0.000729369 | 1096 |
| ALK.times.uln  | =  | Missing                 |    |                          |    | Missing     | 0.000167713  | 1097 |
| ALK.times.uln  | <  | 2.843304606             |    |                          |    | Missing     | -0.000177171 | 1097 |
| ALK.times.uln  | >= | 2.843304606 PLT.resultn | =  | Missing                  |    | Missing     | 0.002198228  | 1097 |
| ALK.times.uln  | >= | 2.843304606 PLT.resultn | <  | 211.5                    |    | Missing     | 0.004506513  | 1097 |
| ALK.times.uln  | >= | 2.843304606 PLT.resultn | >= | 211.5 AST.resultn        | =  | Missing     | 0.001696427  | 1097 |
| ALK.times.uln  | >= | 2.843304606 PLT.resultn | >= | 211.5 AST.resultn        | <  | 65.5        | 0.007803565  | 1097 |
| ALK.times.uln  | >= | 2.843304606 PLT.resultn | >= | 211.5 AST.resultn        | >= | 65.5        | 0            | 1097 |
| age.yrs        | =  | Missing                 |    |                          |    | Missing     | -0.000284582 | 1098 |
| age.yrs        | <  | 70.88295688 PLT.resultn | =  | Missing                  |    | Missing     | -0.001148058 | 1098 |
| age.yrs        | <  | 70.88295688 PLT.resultn | <  | 249.5 ALK.times.uln      | =  | Missing     | 0            | 1098 |
| age.yrs        | <  | 70.88295688 PLT.resultn | <  | 249.5 ALK.times.uln      | <  | 2.905037968 | -0.0004206   | 1098 |
| age.yrs        | <  | 70.88295688 PLT.resultn | <  | 249.5 ALK.times.uln      | >= | 2.905037968 | 0.002171856  | 1098 |
| age.yrs        | <  | 70.88295688 PLT.resultn | >= | 249.5                    |    | Missing     | -0.00066053  | 1098 |
| age.yrs        | >= | 70.88295688             |    |                          |    | Missing     | 0.003383391  | 1098 |
| ALK.times.uln  | =  | Missing TBILL.resultn   | =  | Missing                  |    |             | -1.62E-05    | 1099 |

|                |    |             |               |    |                  |               |             |              |              |      |
|----------------|----|-------------|---------------|----|------------------|---------------|-------------|--------------|--------------|------|
| ALK.times.uln  | =  | Missing     | TBILL.resultn | <  | 1.1              |               |             | 7.26E-06     | 1099         |      |
| ALK.times.uln  | =  | Missing     | TBILL.resultn | >= | 1.1              |               |             | 0.003582605  | 1099         |      |
| ALK.times.uln  | <  | 5.462893197 | PLT.resultn   | =  | Missing          |               |             | 0            | 1099         |      |
| ALK.times.uln  | <  | 5.462893197 | PLT.resultn   | <  | 183              |               |             | 0.003717866  | 1099         |      |
| ALK.times.uln  | <  | 5.462893197 | PLT.resultn   | >= | 183              |               |             | 0.000379134  | 1099         |      |
| ALK.times.uln  | >= | 5.462893197 |               |    |                  |               |             | 0.002496943  | 1099         |      |
| ALB.resultn    | =  | Missing     |               |    |                  | Missing       |             | -0.000229096 | 1100         |      |
| ALB.resultn    | <  | 2.915       |               |    |                  | Missing       |             | 0.001624795  | 1100         |      |
| ALB.resultn    | >= | 2.915       | TBILL.resultn | =  | Missing          |               |             | -0.000145649 | 1100         |      |
| ALB.resultn    | >= | 2.915       | TBILL.resultn | <  | 3 Sodium.resultn | =             | Missing     | 0            | 1100         |      |
| ALB.resultn    | >= | 2.915       | TBILL.resultn | <  | 3 Sodium.resultn | <             | 136.5       | 0.002063276  | 1100         |      |
| ALB.resultn    | >= | 2.915       | TBILL.resultn | <  | 3 Sodium.resultn | >=            | 136.5       | -0.000414971 | 1100         |      |
| ALB.resultn    | >= | 2.915       | TBILL.resultn | >= | 3                |               |             | Missing      | -0.000244204 | 1100 |
| Sodium.resultn | =  | Missing     |               |    |                  | Missing       |             | Missing      | -0.00266734  | 1101 |
| Sodium.resultn | <  | 140.5       | ALB.resultn   | =  | Missing          |               |             | Missing      | -0.001530458 | 1101 |
| Sodium.resultn | <  | 140.5       | ALB.resultn   | <  | 3.31             |               |             | Missing      | -0.00048587  | 1101 |
| Sodium.resultn | <  | 140.5       | ALB.resultn   | >= | 3.31 age.yrs     | =             | Missing     | -0.001662685 | 1101         |      |
| Sodium.resultn | <  | 140.5       | ALB.resultn   | >= | 3.31 age.yrs     | <             | 54.96783025 | -0.002478341 | 1101         |      |
| Sodium.resultn | <  | 140.5       | ALB.resultn   | >= | 3.31 age.yrs     | >=            | 54.96783025 | 0            | 1101         |      |
| Sodium.resultn | >= | 140.5       |               |    |                  | Missing       |             | -0.002682322 | 1101         |      |
| ALK.times.uln  | =  | Missing     | TBILL.resultn | =  | Missing          |               |             | -0.00424156  | 1102         |      |
| ALK.times.uln  | =  | Missing     | TBILL.resultn | <  | 1.15             |               |             | -0.004929415 | 1102         |      |
| ALK.times.uln  | =  | Missing     | TBILL.resultn | >= | 1.15             |               |             | -0.002564914 | 1102         |      |
| ALK.times.uln  | <  | 5.438574341 | age.yrs       | =  | Missing          |               |             | -0.004147711 | 1102         |      |
| ALK.times.uln  | <  | 5.438574341 | age.yrs       | <  | 68.50102669      |               |             | -0.004405333 | 1102         |      |
| ALK.times.uln  | <  | 5.438574341 | age.yrs       | >= | 68.50102669      |               |             | 0            | 1102         |      |
| ALK.times.uln  | >= | 5.438574341 |               |    |                  |               |             | -0.002692724 | 1102         |      |
| AST.resultn    | =  | Missing     |               |    |                  | Missing       |             | -0.000351363 | 1103         |      |
| AST.resultn    | <  | 43          |               |    |                  | Missing       |             | -0.0011596   | 1103         |      |
| AST.resultn    | >= | 43          | psc.yrs.dur   | =  | Missing          |               |             | 0.00010391   | 1103         |      |
| AST.resultn    | >= | 43          | psc.yrs.dur   | <  | 6.258726899      |               |             | -0.000128097 | 1103         |      |
| AST.resultn    | >= | 43          | psc.yrs.dur   | >= | 6.258726899      | psc.yrs.dur   | =           | Missing      | 0.001181087  | 1103 |
| AST.resultn    | >= | 43          | psc.yrs.dur   | >= | 6.258726899      | psc.yrs.dur   | <           | 9.863107461  | 0.003006404  | 1103 |
| AST.resultn    | >= | 43          | psc.yrs.dur   | >= | 6.258726899      | psc.yrs.dur   | >=          | 9.863107461  | 0            | 1103 |
| ALB.resultn    | =  | Missing     |               |    |                  | Missing       |             | -0.000491443 | 1104         |      |
| ALB.resultn    | <  | 2.95        |               |    |                  | Missing       |             | 0.002664935  | 1104         |      |
| ALB.resultn    | >= | 2.95        | AST.resultn   | =  | Missing          |               |             | Missing      | 0.000245353  | 1104 |
| ALB.resultn    | >= | 2.95        | AST.resultn   | <  | 136              | ALK.times.uln | =           | Missing      | 0            | 1104 |
| ALB.resultn    | >= | 2.95        | AST.resultn   | <  | 136              | ALK.times.uln | <           | 2.773309179  | -0.000187091 | 1104 |
| ALB.resultn    | >= | 2.95        | AST.resultn   | <  | 136              | ALK.times.uln | >=          | 2.773309179  | 0.001977627  | 1104 |
| ALB.resultn    | >= | 2.95        | AST.resultn   | >= | 136              |               |             | Missing      | -0.000253157 | 1104 |
| TBILL.resultn  | =  | Missing     |               |    |                  |               |             | -0.002679744 | 1105         |      |
| TBILL.resultn  | <  | 1.95        | age.yrs       | =  | Missing          |               |             | -0.002053303 | 1105         |      |
| TBILL.resultn  | <  | 1.95        | age.yrs       | <  | 64.65571526      |               |             | -0.002275568 | 1105         |      |
| TBILL.resultn  | <  | 1.95        | age.yrs       | >= | 64.65571526      |               |             | 0            | 1105         |      |
| TBILL.resultn  | >= | 1.95        | ALB.resultn   | =  | Missing          |               |             | -0.000383591 | 1105         |      |
| TBILL.resultn  | >= | 1.95        | ALB.resultn   | <  | 3.95             |               |             | 0.0001249    | 1105         |      |
| TBILL.resultn  | >= | 1.95        | ALB.resultn   | >= | 3.95             |               |             | -0.00099378  | 1105         |      |
| ALB.resultn    | =  | Missing     |               |    |                  | Missing       |             | -0.001729543 | 1106         |      |
| ALB.resultn    | <  | 2.915       |               |    |                  | Missing       |             | -0.000162427 | 1106         |      |
| ALB.resultn    | >= | 2.915       | psc.yrs.dur   | =  | Missing          |               |             | -0.001730577 | 1106         |      |
| ALB.resultn    | >= | 2.915       | psc.yrs.dur   | <  | 0.472279261      |               |             | Missing      | -0.00235968  | 1106 |
| ALB.resultn    | >= | 2.915       | psc.yrs.dur   | >= | 0.472279261      | AST.resultn   | =           | Missing      | -0.001112912 | 1106 |
| ALB.resultn    | >= | 2.915       | psc.yrs.dur   | >= | 0.472279261      | AST.resultn   | <           | 47           | -0.002356756 | 1106 |
| ALB.resultn    | >= | 2.915       | psc.yrs.dur   | >= | 0.472279261      | AST.resultn   | >=          | 47           | 0            | 1106 |
| TBILL.resultn  | =  | Missing     |               |    |                  |               |             | -0.002548388 | 1107         |      |
| TBILL.resultn  | <  | 2.05        | age.yrs       | =  | Missing          |               |             | -0.001884531 | 1107         |      |
| TBILL.resultn  | <  | 2.05        | age.yrs       | <  | 64.89253936      |               |             | -0.002090651 | 1107         |      |
| TBILL.resultn  | <  | 2.05        | age.yrs       | >= | 64.89253936      |               |             | 0            | 1107         |      |
| TBILL.resultn  | >= | 2.05        | psc.yrs.dur   | =  | Missing          |               |             | -0.00100815  | 1107         |      |
| TBILL.resultn  | >= | 2.05        | psc.yrs.dur   | <  | 0.407939767      |               |             | -0.001909308 | 1107         |      |
| TBILL.resultn  | >= | 2.05        | psc.yrs.dur   | >= | 0.407939767      |               |             | -0.000227147 | 1107         |      |

|                |    |            |                    |    |             |                    |              |              |              |      |
|----------------|----|------------|--------------------|----|-------------|--------------------|--------------|--------------|--------------|------|
| age.yrs        | =  | Missing    |                    |    | Missing     | -0.004985829       | 1108         |              |              |      |
| age.yrs        | <  | 53.4715948 |                    |    | Missing     | -0.005273713       | 1108         |              |              |      |
| age.yrs        | >= | 53.4715948 | AST.resultn        | =  | Missing     | -0.004324069       | 1108         |              |              |      |
| age.yrs        | >= | 53.4715948 | AST.resultn        | <  | 51.5        | -0.005772019       | 1108         |              |              |      |
| age.yrs        | >= | 53.4715948 | AST.resultn        | >= | 51.5        | psc.yrs.dur        | =            | Missing      | -0.00258653  | 1108 |
| age.yrs        | >= | 53.4715948 | AST.resultn        | >= | 51.5        | psc.yrs.dur        | <            | 0.657084189  | -0.004310883 | 1108 |
| age.yrs        | >= | 53.4715948 | AST.resultn        | >= | 51.5        | psc.yrs.dur        | >=           | 0.657084189  | 0            | 1108 |
| PLT.resultn    | =  | Missing    |                    |    | Missing     | -0.000476749       | 1109         |              |              |      |
| PLT.resultn    | <  | 185.5      |                    |    | Missing     | 0.001374474        | 1109         |              |              |      |
| PLT.resultn    | >= | 185.5      | age.yrs            | =  | Missing     | -0.000732405       | 1109         |              |              |      |
| PLT.resultn    | >= | 185.5      | age.yrs            | <  | 69.55509925 | Hemoglobin.resultn | =            | Missing      | 0            | 1109 |
| PLT.resultn    | >= | 185.5      | age.yrs            | <  | 69.55509925 | Hemoglobin.resultn | <            | 11.75        | -0.001237213 | 1109 |
| PLT.resultn    | >= | 185.5      | age.yrs            | <  | 69.55509925 | Hemoglobin.resultn | >=           | 11.75        | -0.001041076 | 1109 |
| PLT.resultn    | >= | 185.5      | age.yrs            | >= | 69.55509925 |                    |              | Missing      | 0.002321858  | 1109 |
| psc.yrs.dur    | =  | Missing    |                    |    | Missing     | -0.001851189       | 1110         |              |              |      |
| psc.yrs.dur    | <  | 2.05065024 |                    |    | Missing     | -0.00223015        | 1110         |              |              |      |
| psc.yrs.dur    | >= | 2.05065024 | psc.yrs.dur        | =  | Missing     | -0.001056294       | 1110         |              |              |      |
| psc.yrs.dur    | >= | 2.05065024 | psc.yrs.dur        | <  | 2.902121834 |                    | Missing      | 0.001774186  | 1110         |      |
| psc.yrs.dur    | >= | 2.05065024 | psc.yrs.dur        | >= | 2.902121834 | psc.yrs.dur        | =            | Missing      | -0.00163904  | 1110 |
| psc.yrs.dur    | >= | 2.05065024 | psc.yrs.dur        | >= | 2.902121834 | psc.yrs.dur        | <            | 7.404517454  | -0.002718408 | 1110 |
| psc.yrs.dur    | >= | 2.05065024 | psc.yrs.dur        | >= | 2.902121834 | psc.yrs.dur        | >=           | 7.404517454  | 0            | 1110 |
| TBILI.resultn  | =  | Missing    |                    |    |             | 0.000798952        | 1111         |              |              |      |
| TBILI.resultn  | <  | 1.55       | ALK.times.uln      | =  | Missing     | 0                  | 1111         |              |              |      |
| TBILI.resultn  | <  | 1.55       | ALK.times.uln      | <  | 5.603912987 |                    | -0.000317205 | 1111         |              |      |
| TBILI.resultn  | <  | 1.55       | ALK.times.uln      | >= | 5.603912987 |                    | 0.002461994  | 1111         |              |      |
| TBILI.resultn  | >= | 1.55       | Hemoglobin.resultn | =  | Missing     | 0.000602144        | 1111         |              |              |      |
| TBILI.resultn  | >= | 1.55       | Hemoglobin.resultn | <  | 13.8        |                    | 0.001790566  | 1111         |              |      |
| TBILI.resultn  | >= | 1.55       | Hemoglobin.resultn | >= | 13.8        |                    | -0.000516372 | 1111         |              |      |
| TBILI.resultn  | =  | Missing    |                    |    |             | -0.005755127       | 1112         |              |              |      |
| TBILI.resultn  | <  | 1.05       |                    |    |             | -0.006322099       | 1112         |              |              |      |
| TBILI.resultn  | >= | 1.05       | Hemoglobin.resultn | =  | Missing     | -0.003564179       | 1112         |              |              |      |
| TBILI.resultn  | >= | 1.05       | Hemoglobin.resultn | <  | 13.75       | Hemoglobin.resultn | =            | Missing      | -0.003517643 | 1112 |
| TBILI.resultn  | >= | 1.05       | Hemoglobin.resultn | <  | 13.75       | Hemoglobin.resultn | <            | 12.65        | -0.005471889 | 1112 |
| TBILI.resultn  | >= | 1.05       | Hemoglobin.resultn | <  | 13.75       | Hemoglobin.resultn | >=           | 12.65        | 0            | 1112 |
| TBILI.resultn  | >= | 1.05       | Hemoglobin.resultn | >= | 13.75       |                    | Missing      | -0.006191936 | 1112         |      |
| ALK.times.uln  | =  | Missing    | age.yrs            | =  | Missing     | -0.000142365       | 1113         |              |              |      |
| ALK.times.uln  | =  | Missing    | age.yrs            | <  | 53.55509925 |                    | -0.000810474 | 1113         |              |      |
| ALK.times.uln  | =  | Missing    | age.yrs            | >= | 53.55509925 |                    | 0.001665461  | 1113         |              |      |
| ALK.times.uln  | <  | 6.02       | TBILI.resultn      | =  | Missing     | -0.000489947       | 1113         |              |              |      |
| ALK.times.uln  | <  | 6.02       | TBILI.resultn      | <  | 0.85        |                    | -0.000818163 | 1113         |              |      |
| ALK.times.uln  | <  | 6.02       | TBILI.resultn      | >= | 0.85        |                    | 0            | 1113         |              |      |
| ALK.times.uln  | >= | 6.02       |                    |    |             | 0.001645432        | 1113         |              |              |      |
| Sodium.resultn | =  | Missing    |                    |    |             | -0.000555733       | 1114         |              |              |      |
| Sodium.resultn | <  | 138.5      | age.yrs            | =  | Missing     | 0.000437183        | 1114         |              |              |      |
| Sodium.resultn | <  | 138.5      | age.yrs            | <  | 48.80355921 |                    | -0.000330189 | 1114         |              |      |
| Sodium.resultn | <  | 138.5      | age.yrs            | >= | 48.80355921 | PLT.resultn        | =            | Missing      | 0.001856823  | 1114 |
| Sodium.resultn | <  | 138.5      | age.yrs            | >= | 48.80355921 | PLT.resultn        | <            | 251.5        | 0.003713645  | 1114 |
| Sodium.resultn | <  | 138.5      | age.yrs            | >= | 48.80355921 | PLT.resultn        | >=           | 251.5        | 0            | 1114 |
| Sodium.resultn | >= | 138.5      |                    |    |             | -0.000757831       | 1114         |              |              |      |
| ALB.resultn    | =  | Missing    |                    |    |             | -0.001022919       | 1115         |              |              |      |
| ALB.resultn    | <  | 3.62       | PLT.resultn        | =  | Missing     | 8.91E-05           | 1115         |              |              |      |
| ALB.resultn    | <  | 3.62       | PLT.resultn        | <  | 245         |                    | 0.001877876  | 1115         |              |      |
| ALB.resultn    | <  | 3.62       | PLT.resultn        | >= | 245         |                    | -0.000932983 | 1115         |              |      |
| ALB.resultn    | >= | 3.62       | TBILI.resultn      | =  | Missing     | -0.001456148       | 1115         |              |              |      |
| ALB.resultn    | >= | 3.62       | TBILI.resultn      | <  | 2.05        |                    | -0.001568159 | 1115         |              |      |
| ALB.resultn    | >= | 3.62       | TBILI.resultn      | >= | 2.05        |                    | 0            | 1115         |              |      |
| Sodium.resultn | =  | Missing    |                    |    |             | -0.001655724       | 1116         |              |              |      |
| Sodium.resultn | <  | 136.5      |                    |    |             | 0.000361372        | 1116         |              |              |      |
| Sodium.resultn | >= | 136.5      | ALK.times.uln      | =  | Missing     | TBILI.resultn      | =            | Missing      | -0.001431645 | 1116 |
| Sodium.resultn | >= | 136.5      | ALK.times.uln      | =  | Missing     | TBILI.resultn      | <            | 0.75         | -0.002249727 | 1116 |
| Sodium.resultn | >= | 136.5      | ALK.times.uln      | =  | Missing     | TBILI.resultn      | >=           | 0.75         | 0            | 1116 |
| Sodium.resultn | >= | 136.5      | ALK.times.uln      | <  | 5.965616681 |                    | Missing      | -0.001948458 | 1116         |      |

|                |    |             |                    |    |             |                    |              |              |              |      |
|----------------|----|-------------|--------------------|----|-------------|--------------------|--------------|--------------|--------------|------|
| Sodium.resultn | >= | 136.5       | ALK.times.uln      | >= | 5.965616681 | Missing            | 0.000147578  | 1116         |              |      |
| PLT.resultn    | =  | Missing     |                    |    |             |                    | -0.000806133 | 1117         |              |      |
| PLT.resultn    | <  | 195.5       | TBILL.resultn      | =  | Missing     |                    | 0.000487502  | 1117         |              |      |
| PLT.resultn    | <  | 195.5       | TBILL.resultn      | <  | 1.5         |                    | -0.000352552 | 1117         |              |      |
| PLT.resultn    | <  | 195.5       | TBILL.resultn      | >= | 1.5         |                    | 0.001915593  | 1117         |              |      |
| PLT.resultn    | >= | 195.5       | Hemoglobin.resultn | =  | Missing     |                    | 0            | 1117         |              |      |
| PLT.resultn    | >= | 195.5       | Hemoglobin.resultn | <  | 13.85       |                    | -0.000832525 | 1117         |              |      |
| PLT.resultn    | >= | 195.5       | Hemoglobin.resultn | >= | 13.85       |                    | -0.001787797 | 1117         |              |      |
| ALB.resultn    | =  | Missing     |                    |    |             | Missing            | -0.001001063 | 1118         |              |      |
| ALB.resultn    | <  | 2.95        |                    |    |             | Missing            | 0.000843997  | 1118         |              |      |
| ALB.resultn    | >= | 2.95        | TBILL.resultn      | =  | Missing     | Missing            | -0.000903662 | 1118         |              |      |
| ALB.resultn    | >= | 2.95        | TBILL.resultn      | <  | 2.6         | TBILL.resultn      | =            | Missing      | -0.000888611 | 1118 |
| ALB.resultn    | >= | 2.95        | TBILL.resultn      | <  | 2.6         | TBILL.resultn      | <            | 0.75         | -0.001679393 | 1118 |
| ALB.resultn    | >= | 2.95        | TBILL.resultn      | <  | 2.6         | TBILL.resultn      | >=           | 0.75         | 0            | 1118 |
| ALB.resultn    | >= | 2.95        | TBILL.resultn      | >= | 2.6         |                    | Missing      | -0.00116205  | 1118         |      |
| ALB.resultn    | =  | Missing     |                    |    |             | Missing            | -0.005171445 | 1119         |              |      |
| ALB.resultn    | <  | 3.105       |                    |    |             | Missing            | -0.003904485 | 1119         |              |      |
| ALB.resultn    | >= | 3.105       | TBILL.resultn      | =  | Missing     | Missing            | -0.005634135 | 1119         |              |      |
| ALB.resultn    | >= | 3.105       | TBILL.resultn      | <  | 0.95        | Missing            | -0.00597612  | 1119         |              |      |
| ALB.resultn    | >= | 3.105       | TBILL.resultn      | >= | 0.95        | Hemoglobin.resultn | =            | Missing      | 0            | 1119 |
| ALB.resultn    | >= | 3.105       | TBILL.resultn      | >= | 0.95        | Hemoglobin.resultn | <            | 12.5         | -0.005068178 | 1119 |
| ALB.resultn    | >= | 3.105       | TBILL.resultn      | >= | 0.95        | Hemoglobin.resultn | >=           | 12.5         | -0.006182036 | 1119 |
| ALK.times.uln  | =  | Missing     | ALB.resultn        | =  | Missing     |                    | Missing      | -0.002020909 | 1120         |      |
| ALK.times.uln  | =  | Missing     | ALB.resultn        | <  | 3.95        | TBILL.resultn      | =            | Missing      | -0.001005125 | 1120 |
| ALK.times.uln  | =  | Missing     | ALB.resultn        | <  | 3.95        | TBILL.resultn      | <            | 0.95         | -0.00201025  | 1120 |
| ALK.times.uln  | =  | Missing     | ALB.resultn        | <  | 3.95        | TBILL.resultn      | >=           | 0.95         | 0            | 1120 |
| ALK.times.uln  | =  | Missing     | ALB.resultn        | >= | 3.95        |                    | Missing      | -0.00200214  | 1120         |      |
| ALK.times.uln  | <  | 6.02        |                    |    |             | Missing            | -0.001284455 | 1120         |              |      |
| ALK.times.uln  | >= | 6.02        |                    |    |             | Missing            | -5.01E-05    | 1120         |              |      |
| PLT.resultn    | =  | Missing     |                    |    |             | Missing            | -0.003156144 | 1121         |              |      |
| PLT.resultn    | <  | 249.5       | ALB.resultn        | =  | Missing     | Missing            | -0.00218413  | 1121         |              |      |
| PLT.resultn    | <  | 249.5       | ALB.resultn        | <  | 3.75        | TBILL.resultn      | =            | Missing      | -0.000903174 | 1121 |
| PLT.resultn    | <  | 249.5       | ALB.resultn        | <  | 3.75        | TBILL.resultn      | <            | 1.5          | -0.001806348 | 1121 |
| PLT.resultn    | <  | 249.5       | ALB.resultn        | <  | 3.75        | TBILL.resultn      | >=           | 1.5          | 0            | 1121 |
| PLT.resultn    | <  | 249.5       | ALB.resultn        | >= | 3.75        |                    | Missing      | -0.002544963 | 1121         |      |
| PLT.resultn    | >= | 249.5       |                    |    |             | Missing            | -0.003114071 | 1121         |              |      |
| psc.yrs.dur    | =  | Missing     |                    |    |             |                    | -0.000399017 | 1122         |              |      |
| psc.yrs.dur    | <  | 6.379192334 | ALB.resultn        | =  | Missing     |                    | 0            | 1122         |              |      |
| psc.yrs.dur    | <  | 6.379192334 | ALB.resultn        | <  | 3.05        |                    | 0.000873089  | 1122         |              |      |
| psc.yrs.dur    | <  | 6.379192334 | ALB.resultn        | >= | 3.05        |                    | -0.00083102  | 1122         |              |      |
| psc.yrs.dur    | >= | 6.379192334 | psc.yrs.dur        | =  | Missing     |                    | 0.001311045  | 1122         |              |      |
| psc.yrs.dur    | >= | 6.379192334 | psc.yrs.dur        | <  | 8.633812457 |                    | 0.003741     | 1122         |              |      |
| psc.yrs.dur    | >= | 6.379192334 | psc.yrs.dur        | >= | 8.633812457 |                    | 3.82E-05     | 1122         |              |      |
| age.yrs        | =  | Missing     |                    |    |             | Missing            | -0.001399514 | 1123         |              |      |
| age.yrs        | <  | 54.39972621 |                    |    |             | Missing            | -0.001640049 | 1123         |              |      |
| age.yrs        | >= | 54.39972621 | TBILL.resultn      | =  | Missing     | Missing            | -0.00056819  | 1123         |              |      |
| age.yrs        | >= | 54.39972621 | TBILL.resultn      | <  | 1.31        | ALB.resultn        | =            | Missing      | -0.001102008 | 1123 |
| age.yrs        | >= | 54.39972621 | TBILL.resultn      | <  | 1.31        | ALB.resultn        | <            | 4.25         | -0.00143595  | 1123 |
| age.yrs        | >= | 54.39972621 | TBILL.resultn      | <  | 1.31        | ALB.resultn        | >=           | 4.25         | 0            | 1123 |
| age.yrs        | >= | 54.39972621 | TBILL.resultn      | >= | 1.31        |                    | Missing      | 0.001615609  | 1123         |      |
| age.yrs        | =  | Missing     |                    |    |             | Missing            | 0.000418744  | 1124         |              |      |
| age.yrs        | <  | 69.84257358 | psc.yrs.dur        | =  | Missing     | Missing            | 0.000289562  | 1124         |              |      |
| age.yrs        | <  | 69.84257358 | psc.yrs.dur        | <  | 1.961670089 |                    | -3.61E-05    | 1124         |              |      |
| age.yrs        | <  | 69.84257358 | psc.yrs.dur        | >= | 1.961670089 | Sodium.resultn     | =            | Missing      | 0            | 1124 |
| age.yrs        | <  | 69.84257358 | psc.yrs.dur        | >= | 1.961670089 | Sodium.resultn     | <            | 138.5        | 0.002848377  | 1124 |
| age.yrs        | <  | 69.84257358 | psc.yrs.dur        | >= | 1.961670089 | Sodium.resultn     | >=           | 138.5        | 0.000729588  | 1124 |
| age.yrs        | >= | 69.84257358 |                    |    |             | Missing            | 0.002813589  | 1124         |              |      |
| ALB.resultn    | =  | Missing     |                    |    |             | Missing            | -0.002196453 | 1125         |              |      |
| ALB.resultn    | <  | 2.95        |                    |    |             | Missing            | -9.90E-05    | 1125         |              |      |
| ALB.resultn    | >= | 2.95        | ALK.times.uln      | =  | Missing     | psc.yrs.dur        | =            | Missing      | -0.002300187 | 1125 |
| ALB.resultn    | >= | 2.95        | ALK.times.uln      | =  | Missing     | psc.yrs.dur        | <            | 6.984257358  | -0.002875234 | 1125 |
| ALB.resultn    | >= | 2.95        | ALK.times.uln      | =  | Missing     | psc.yrs.dur        | >=           | 6.984257358  | 0            | 1125 |



|             |    |                            |    |                           |         |              |              |      |
|-------------|----|----------------------------|----|---------------------------|---------|--------------|--------------|------|
| ALB.resultn | >= | 2.95 ALK.times.uln         | <  | 5.462893197               | Missing | -0.002659308 | 1125         |      |
| ALB.resultn | >= | 2.95 ALK.times.uln         | >= | 5.462893197               | Missing | -0.000403982 | 1125         |      |
| ALB.resultn | =  | Missing                    |    |                           | Missing | -0.000522825 | 1126         |      |
| ALB.resultn | <  | 2.915                      |    |                           | Missing | 0.002465927  | 1126         |      |
| ALB.resultn | >= | 2.915 Sodium.resultn       | =  | Missing                   | Missing | -0.000250054 | 1126         |      |
| ALB.resultn | >= | 2.915 Sodium.resultn       | <  | 136.5                     | Missing | 0.002496342  | 1126         |      |
| ALB.resultn | >= | 2.915 Sodium.resultn       | >= | 136.5 PLT.resultn         | =       | Missing      | 0.000287373  | 1126 |
| ALB.resultn | >= | 2.915 Sodium.resultn       | >= | 136.5 PLT.resultn         | <       | 186.5        | 0.003563421  | 1126 |
| ALB.resultn | >= | 2.915 Sodium.resultn       | >= | 136.5 PLT.resultn         | >=      | 186.5        | 0            | 1126 |
| PLT.resultn | =  | Missing                    |    |                           |         | -0.002009119 | 1127         |      |
| PLT.resultn | <  | 198.5 TBILL.resultn        | =  | Missing                   |         | -0.00058786  | 1127         |      |
| PLT.resultn | <  | 198.5 TBILL.resultn        | <  | 1.25                      |         | -0.001975657 | 1127         |      |
| PLT.resultn | <  | 198.5 TBILL.resultn        | >= | 1.25                      |         | 0.001910175  | 1127         |      |
| PLT.resultn | >= | 198.5 Hemoglobin.resultn   | =  | Missing                   |         | 0            | 1127         |      |
| PLT.resultn | >= | 198.5 Hemoglobin.resultn   | <  | 13.85                     |         | -0.001000462 | 1127         |      |
| PLT.resultn | >= | 198.5 Hemoglobin.resultn   | >= | 13.85                     |         | -0.001840207 | 1127         |      |
| psc.yrs.dur | =  | Missing                    |    |                           | Missing | -0.004009717 | 1128         |      |
| psc.yrs.dur | <  | 1.360711841                |    |                           | Missing | -0.004369622 | 1128         |      |
| psc.yrs.dur | >= | 1.360711841 Sodium.resultn | =  | Missing                   | Missing | -0.004071311 | 1128         |      |
| psc.yrs.dur | >= | 1.360711841 Sodium.resultn | <  | 138.5 age.yrs             | =       | Missing      | -0.002020443 | 1128 |
| psc.yrs.dur | >= | 1.360711841 Sodium.resultn | <  | 138.5 age.yrs             | <       | 48.39835729  | -0.003704145 | 1128 |
| psc.yrs.dur | >= | 1.360711841 Sodium.resultn | <  | 138.5 age.yrs             | >=      | 48.39835729  | 0            | 1128 |
| psc.yrs.dur | >= | 1.360711841 Sodium.resultn | >= | 138.5                     | Missing | -0.003547804 | 1128         |      |
| ALB.resultn | =  | Missing                    |    |                           |         | -0.000752695 | 1129         |      |
| ALB.resultn | <  | 3.31 psc.yrs.dur           | =  | Missing                   |         | 0.000908804  | 1129         |      |
| ALB.resultn | <  | 3.31 psc.yrs.dur           | <  | 2.543463381               |         | 0.00015785   | 1129         |      |
| ALB.resultn | <  | 3.31 psc.yrs.dur           | >= | 2.543463381               |         | 0.001932833  | 1129         |      |
| ALB.resultn | >= | 3.31 ALK.times.uln         | =  | Missing                   |         | 0            | 1129         |      |
| ALB.resultn | >= | 3.31 ALK.times.uln         | <  | 5.462893197               |         | -0.000184406 | 1129         |      |
| ALB.resultn | >= | 3.31 ALK.times.uln         | >= | 5.462893197               |         | 0.001456173  | 1129         |      |
| ALB.resultn | =  | Missing                    |    |                           | Missing | -0.004351992 | 1130         |      |
| ALB.resultn | <  | 2.915                      |    |                           | Missing | -0.001718232 | 1130         |      |
| ALB.resultn | >= | 2.915 psc.yrs.dur          | =  | Missing                   | Missing | -0.003586612 | 1130         |      |
| ALB.resultn | >= | 2.915 psc.yrs.dur          | <  | 6.262833676               | Missing | -0.003703749 | 1130         |      |
| ALB.resultn | >= | 2.915 psc.yrs.dur          | >= | 6.262833676 AST.resultn   | =       | Missing      | -0.002831281 | 1130 |
| ALB.resultn | >= | 2.915 psc.yrs.dur          | >= | 6.262833676 AST.resultn   | <       | 66.5         | -0.004321429 | 1130 |
| ALB.resultn | >= | 2.915 psc.yrs.dur          | >= | 6.262833676 AST.resultn   | >=      | 66.5         | 0            | 1130 |
| AST.resultn | =  | Missing                    |    |                           | Missing | -0.00159848  | 1131         |      |
| AST.resultn | <  | 43.5                       |    |                           | Missing | -0.001614724 | 1131         |      |
| AST.resultn | >= | 43.5 psc.yrs.dur           | =  | Missing                   | Missing | -0.000512196 | 1131         |      |
| AST.resultn | >= | 43.5 psc.yrs.dur           | <  | 6.258726899 TBILL.resultn | =       | Missing      | -0.00075378  | 1131 |
| AST.resultn | >= | 43.5 psc.yrs.dur           | <  | 6.258726899 TBILL.resultn | <       | 0.85         | -0.001595501 | 1131 |
| AST.resultn | >= | 43.5 psc.yrs.dur           | <  | 6.258726899 TBILL.resultn | >=      | 0.85         | 0            | 1131 |
| AST.resultn | >= | 43.5 psc.yrs.dur           | >= | 6.258726899               | Missing | 0.001232578  | 1131         |      |
| age.yrs     | =  | Missing                    |    |                           | Missing | -0.001597361 | 1132         |      |
| age.yrs     | <  | 53.46475017                |    |                           | Missing | -0.001859685 | 1132         |      |
| age.yrs     | >= | 53.46475017 AST.resultn    | =  | Missing                   | Missing | -0.000907824 | 1132         |      |
| age.yrs     | >= | 53.46475017 AST.resultn    | <  | 51.5                      | Missing | -0.002213728 | 1132         |      |
| age.yrs     | >= | 53.46475017 AST.resultn    | >= | 51.5 ALB.resultn          | =       | Missing      | 0.000477226  | 1132 |
| age.yrs     | >= | 53.46475017 AST.resultn    | >= | 51.5 ALB.resultn          | <       | 3.95         | 0.000898307  | 1132 |
| age.yrs     | >= | 53.46475017 AST.resultn    | >= | 51.5 ALB.resultn          | >=      | 3.95         | 0            | 1132 |
| ALB.resultn | =  | Missing                    |    |                           |         | -1.72E-05    | 1133         |      |
| ALB.resultn | <  | 3.225 psc.yrs.dur          | =  | Missing                   |         | 0.002515566  | 1133         |      |
| ALB.resultn | <  | 3.225 psc.yrs.dur          | <  | 1.497604381               |         | 0.001773515  | 1133         |      |
| ALB.resultn | <  | 3.225 psc.yrs.dur          | >= | 1.497604381               |         | 0.003480233  | 1133         |      |
| ALB.resultn | >= | 3.225 TBILL.resultn        | =  | Missing                   |         | 0.000446745  | 1133         |      |
| ALB.resultn | >= | 3.225 TBILL.resultn        | <  | 2.95                      |         | 0.000469655  | 1133         |      |
| ALB.resultn | >= | 3.225 TBILL.resultn        | >= | 2.95                      |         | 0            | 1133         |      |
| age.yrs     | =  | Missing                    |    |                           | Missing | 0.000162629  | 1134         |      |
| age.yrs     | <  | 70.37645448 PLT.resultn    | =  | Missing                   | Missing | -0.00067073  | 1134         |      |
| age.yrs     | <  | 70.37645448 PLT.resultn    | <  | 209.5 ALB.resultn         | =       | Missing      | 0.000815351  | 1134 |
| age.yrs     | <  | 70.37645448 PLT.resultn    | <  | 209.5 ALB.resultn         | <       | 3.75         | 0.003179868  | 1134 |

|                    |    |             |                    |    |             |               |         |             |              |      |
|--------------------|----|-------------|--------------------|----|-------------|---------------|---------|-------------|--------------|------|
| age.yrs            | <  | 70.37645448 | PLT.resultn        | <  | 209.5       | ALB.resultn   | >=      | 3.75        | 0            | 1134 |
| age.yrs            | <  | 70.37645448 | PLT.resultn        | >= | 209.5       |               | Missing |             | -6.93E-05    | 1134 |
| age.yrs            | >= | 70.37645448 |                    |    |             |               | Missing |             | 0.003938104  | 1134 |
| psc.yrs.dur        | =  | Missing     |                    |    |             |               |         |             | 0.000491101  | 1135 |
| psc.yrs.dur        | <  | 6.324435318 | Sodium.resultn     | =  | Missing     |               |         |             | 0            | 1135 |
| psc.yrs.dur        | <  | 6.324435318 | Sodium.resultn     | <  | 136.5       |               |         |             | 0.001678822  | 1135 |
| psc.yrs.dur        | <  | 6.324435318 | Sodium.resultn     | >= | 136.5       |               |         |             | 0.000432803  | 1135 |
| psc.yrs.dur        | >= | 6.324435318 | AST.resultn        | =  | Missing     |               |         |             | 0.001586935  | 1135 |
| psc.yrs.dur        | >= | 6.324435318 | AST.resultn        | <  | 54.5        |               |         |             | 0.000595922  | 1135 |
| psc.yrs.dur        | >= | 6.324435318 | AST.resultn        | >= | 54.5        |               |         |             | 0.002719522  | 1135 |
| age.yrs            | =  | Missing     |                    |    |             |               | Missing |             | -0.001171032 | 1136 |
| age.yrs            | <  | 53.33470226 |                    |    |             |               | Missing |             | -0.001545049 | 1136 |
| age.yrs            | >= | 53.33470226 | TBILL.resultn      | =  | Missing     |               | Missing |             | -0.00027838  | 1136 |
| age.yrs            | >= | 53.33470226 | TBILL.resultn      | <  | 0.75        |               | Missing |             | -0.001982257 | 1136 |
| age.yrs            | >= | 53.33470226 | TBILL.resultn      | >= | 0.75        | age.yrs       | =       | Missing     | 0.001246141  | 1136 |
| age.yrs            | >= | 53.33470226 | TBILL.resultn      | >= | 0.75        | age.yrs       | <       | 57.35386721 | 0.003382384  | 1136 |
| age.yrs            | >= | 53.33470226 | TBILL.resultn      | >= | 0.75        | age.yrs       | >=      | 57.35386721 | 0            | 1136 |
| Hemoglobin.resultn | =  | Missing     | ALB.resultn        | =  | Missing     |               |         |             | -0.001709648 | 1137 |
| Hemoglobin.resultn | =  | Missing     | ALB.resultn        | <  | 3.55        |               |         |             | 0.001326351  | 1137 |
| Hemoglobin.resultn | =  | Missing     | ALB.resultn        | >= | 3.55        |               |         |             | -0.000472142 | 1137 |
| Hemoglobin.resultn | <  | 13.75       | ALK.times.uln      | =  | Missing     |               |         |             | -0.000665594 | 1137 |
| Hemoglobin.resultn | <  | 13.75       | ALK.times.uln      | <  | 5.446215139 |               |         |             | -0.000779993 | 1137 |
| Hemoglobin.resultn | <  | 13.75       | ALK.times.uln      | >= | 5.446215139 |               |         |             | 0            | 1137 |
| Hemoglobin.resultn | >= | 13.75       |                    |    |             |               |         |             | -0.001610342 | 1137 |
| TBILL.resultn      | =  | Missing     |                    |    |             |               |         |             | 0.002571671  | 1138 |
| TBILL.resultn      | <  | 1.65        | ALK.times.uln      | =  | Missing     |               |         |             | 0            | 1138 |
| TBILL.resultn      | <  | 1.65        | ALK.times.uln      | <  | 5.963877551 |               |         |             | 6.17E-05     | 1138 |
| TBILL.resultn      | <  | 1.65        | ALK.times.uln      | >= | 5.963877551 |               |         |             | 0.002087006  | 1138 |
| TBILL.resultn      | >= | 1.65        | Hemoglobin.resultn | =  | Missing     |               |         |             | 0.000374035  | 1138 |
| TBILL.resultn      | >= | 1.65        | Hemoglobin.resultn | <  | 12.9        |               |         |             | 0.001196212  | 1138 |
| TBILL.resultn      | >= | 1.65        | Hemoglobin.resultn | >= | 12.9        |               |         |             | -0.000448142 | 1138 |
| ALB.resultn        | =  | Missing     |                    |    |             |               | Missing |             | -0.003523716 | 1139 |
| ALB.resultn        | <  | 2.965       |                    |    |             |               | Missing |             | -0.001265713 | 1139 |
| ALB.resultn        | >= | 2.965       | psc.yrs.dur        | =  | Missing     |               | Missing |             | -0.003449111 | 1139 |
| ALB.resultn        | >= | 2.965       | psc.yrs.dur        | <  | 8.026009582 |               | Missing |             | -0.003670058 | 1139 |
| ALB.resultn        | >= | 2.965       | psc.yrs.dur        | >= | 8.026009582 | TBILL.resultn | =       | Missing     | -0.001869747 | 1139 |
| ALB.resultn        | >= | 2.965       | psc.yrs.dur        | >= | 8.026009582 | TBILL.resultn | <       | 0.95        | -0.00420693  | 1139 |
| ALB.resultn        | >= | 2.965       | psc.yrs.dur        | >= | 8.026009582 | TBILL.resultn | >=      | 0.95        | 0            | 1139 |
| ALB.resultn        | =  | Missing     |                    |    |             |               | Missing |             | -0.001673021 | 1140 |
| ALB.resultn        | <  | 2.915       |                    |    |             |               | Missing |             | 0.000319646  | 1140 |
| ALB.resultn        | >= | 2.915       | TBILL.resultn      | =  | Missing     |               | Missing |             | -0.001901898 | 1140 |
| ALB.resultn        | >= | 2.915       | TBILL.resultn      | <  | 0.85        |               | Missing |             | -0.002447118 | 1140 |
| ALB.resultn        | >= | 2.915       | TBILL.resultn      | >= | 0.85        | psc.yrs.dur   | =       | Missing     | -0.001231277 | 1140 |
| ALB.resultn        | >= | 2.915       | TBILL.resultn      | >= | 0.85        | psc.yrs.dur   | <       | 6.506502396 | -0.001558578 | 1140 |
| ALB.resultn        | >= | 2.915       | TBILL.resultn      | >= | 0.85        | psc.yrs.dur   | >=      | 6.506502396 | 0            | 1140 |
| TBILL.resultn      | =  | Missing     |                    |    |             |               |         |             | 0.001119512  | 1141 |
| TBILL.resultn      | <  | 2.05        | psc.yrs.dur        | =  | Missing     |               |         |             | -0.000823928 | 1141 |
| TBILL.resultn      | <  | 2.05        | psc.yrs.dur        | <  | 1.961670089 |               |         |             | -0.001221686 | 1141 |
| TBILL.resultn      | <  | 2.05        | psc.yrs.dur        | >= | 1.961670089 |               |         |             | 0            | 1141 |
| TBILL.resultn      | >= | 2.05        | TBILL.resultn      | =  | Missing     |               |         |             | 0.000329521  | 1141 |
| TBILL.resultn      | >= | 2.05        | TBILL.resultn      | <  | 3.75        |               |         |             | 0.000891379  | 1141 |
| TBILL.resultn      | >= | 2.05        | TBILL.resultn      | >= | 3.75        |               |         |             | -0.000513266 | 1141 |
| ALB.resultn        | =  | Missing     |                    |    |             |               |         |             | -4.17E-08    | 1142 |
| ALB.resultn        | <  | 3.59        | Hemoglobin.resultn | =  | Missing     |               |         |             | 0.002156558  | 1142 |
| ALB.resultn        | <  | 3.59        | Hemoglobin.resultn | <  | 12.75       |               |         |             | 0.000790826  | 1142 |
| ALB.resultn        | <  | 3.59        | Hemoglobin.resultn | >= | 12.75       |               |         |             | 0.003607648  | 1142 |
| ALB.resultn        | >= | 3.59        | TBILL.resultn      | =  | Missing     |               |         |             | 0.000868597  | 1142 |
| ALB.resultn        | >= | 3.59        | TBILL.resultn      | <  | 2.55        |               |         |             | 0.000917122  | 1142 |
| ALB.resultn        | >= | 3.59        | TBILL.resultn      | >= | 2.55        |               |         |             | 0            | 1142 |
| ALB.resultn        | =  | Missing     |                    |    |             |               | Missing |             | -0.002535531 | 1143 |
| ALB.resultn        | <  | 2.85        |                    |    |             |               | Missing |             | -0.000578268 | 1143 |
| ALB.resultn        | >= | 2.85        | psc.yrs.dur        | =  | Missing     |               | Missing |             | -0.002292297 | 1143 |

|               |    |                           |    |                        |         |              |              |      |
|---------------|----|---------------------------|----|------------------------|---------|--------------|--------------|------|
| ALB.resultn   | >= | 2.85 psc.yrs.dur          | <  | 0.802190281            | Missing | -0.002816919 | 1143         |      |
| ALB.resultn   | >= | 2.85 psc.yrs.dur          | >= | 0.802190281 age.yrs    | =       | Missing      | -0.001604084 | 1143 |
| ALB.resultn   | >= | 2.85 psc.yrs.dur          | >= | 0.802190281 age.yrs    | <       | 53.4715948   | -0.00219382  | 1143 |
| ALB.resultn   | >= | 2.85 psc.yrs.dur          | >= | 0.802190281 age.yrs    | >=      | 53.4715948   | 0            | 1143 |
| psc.yrs.dur   | =  | Missing                   |    |                        | Missing | -0.001253544 | 1144         |      |
| psc.yrs.dur   | <  | 6.410677618               |    |                        | Missing | -0.001464118 | 1144         |      |
| psc.yrs.dur   | >= | 6.410677618 AST.resultn   | =  | Missing                | Missing | 2.16E-05     | 1144         |      |
| psc.yrs.dur   | >= | 6.410677618 AST.resultn   | <  | 77.5 PLT.resultn       | =       | Missing      | -0.001043439 | 1144 |
| psc.yrs.dur   | >= | 6.410677618 AST.resultn   | <  | 77.5 PLT.resultn       | <       | 233          | -0.002086879 | 1144 |
| psc.yrs.dur   | >= | 6.410677618 AST.resultn   | <  | 77.5 PLT.resultn       | >=      | 233          | 0            | 1144 |
| psc.yrs.dur   | >= | 6.410677618 AST.resultn   | >= | 77.5                   | Missing | 0.002577685  | 1144         |      |
| age.yrs       | =  | Missing                   |    |                        | Missing | -0.003023515 | 1145         |      |
| age.yrs       | <  | 53.29226557               |    |                        | Missing | -0.003258296 | 1145         |      |
| age.yrs       | >= | 53.29226557 psc.yrs.dur   | =  | Missing                | Missing | -0.002503431 | 1145         |      |
| age.yrs       | >= | 53.29226557 psc.yrs.dur   | <  | 0.76659822             | Missing | -0.003242449 | 1145         |      |
| age.yrs       | >= | 53.29226557 psc.yrs.dur   | >= | 0.76659822 AST.resultn | =       | Missing      | -0.001745464 | 1145 |
| age.yrs       | >= | 53.29226557 psc.yrs.dur   | >= | 0.76659822 AST.resultn | <       | 63.5         | -0.0029597   | 1145 |
| age.yrs       | >= | 53.29226557 psc.yrs.dur   | >= | 0.76659822 AST.resultn | >=      | 63.5         | 0            | 1145 |
| psc.yrs.dur   | =  | Missing                   |    |                        |         | -9.23E-06    | 1146         |      |
| psc.yrs.dur   | <  | 7.823408624 TBILI.resultn | =  | Missing                |         | 0            | 1146         |      |
| psc.yrs.dur   | <  | 7.823408624 TBILI.resultn | <  | 3                      |         | -3.20E-05    | 1146         |      |
| psc.yrs.dur   | <  | 7.823408624 TBILI.resultn | >= | 3                      |         | -0.000670447 | 1146         |      |
| psc.yrs.dur   | >= | 7.823408624 AST.resultn   | =  | Missing                |         | 0.00048692   | 1146         |      |
| psc.yrs.dur   | >= | 7.823408624 AST.resultn   | <  | 53.5                   |         | -0.000923104 | 1146         |      |
| psc.yrs.dur   | >= | 7.823408624 AST.resultn   | >= | 53.5                   |         | 0.002153313  | 1146         |      |
| PLT.resultn   | =  | Missing                   |    |                        |         | 0.00082539   | 1147         |      |
| PLT.resultn   | <  | 199 TBILI.resultn         | =  | Missing                |         | 0.001770617  | 1147         |      |
| PLT.resultn   | <  | 199 TBILI.resultn         | <  | 1.65                   |         | 0.000971198  | 1147         |      |
| PLT.resultn   | <  | 199 TBILI.resultn         | >= | 1.65                   |         | 0.003529338  | 1147         |      |
| PLT.resultn   | >= | 199 AST.resultn           | =  | Missing                |         | 0.000817862  | 1147         |      |
| PLT.resultn   | >= | 199 AST.resultn           | <  | 137                    |         | 0.000913195  | 1147         |      |
| PLT.resultn   | >= | 199 AST.resultn           | >= | 137                    |         | 0            | 1147         |      |
| ALK.times.uln | =  | Missing TBILI.resultn     | =  | Missing                |         | 0            | 1148         |      |
| ALK.times.uln | =  | Missing TBILI.resultn     | <  | 1.15                   |         | 1.44E-05     | 1148         |      |
| ALK.times.uln | =  | Missing TBILI.resultn     | >= | 1.15                   |         | 0.002775214  | 1148         |      |
| ALK.times.uln | <  | 5.85173913                |    |                        |         | 0.000439152  | 1148         |      |
| ALK.times.uln | >= | 5.85173913 ALK.times.uln  | =  | Missing                |         | 0.002369194  | 1148         |      |
| ALK.times.uln | >= | 5.85173913 ALK.times.uln  | <  | 7.794978567            |         | 0.0038907    | 1148         |      |
| ALK.times.uln | >= | 5.85173913 ALK.times.uln  | >= | 7.794978567            |         | 0.000847687  | 1148         |      |
| TBILI.resultn | =  | Missing                   |    |                        |         | -0.000270333 | 1149         |      |
| TBILI.resultn | <  | 1.65 Sodium.resultn       | =  | Missing                |         | 0            | 1149         |      |
| TBILI.resultn | <  | 1.65 Sodium.resultn       | <  | 137.5                  |         | 0.001659136  | 1149         |      |
| TBILI.resultn | <  | 1.65 Sodium.resultn       | >= | 137.5                  |         | -0.00017112  | 1149         |      |
| TBILI.resultn | >= | 1.65 ALB.resultn          | =  | Missing                |         | 0.001445277  | 1149         |      |
| TBILI.resultn | >= | 1.65 ALB.resultn          | <  | 3.55                   |         | 0.002088203  | 1149         |      |
| TBILI.resultn | >= | 1.65 ALB.resultn          | >= | 3.55                   |         | 0.000980941  | 1149         |      |
| ALK.times.uln | =  | Missing psc.yrs.dur       | =  | Missing                |         | -0.001585306 | 1150         |      |
| ALK.times.uln | =  | Missing psc.yrs.dur       | <  | 7.80971937             |         | -0.002004066 | 1150         |      |
| ALK.times.uln | =  | Missing psc.yrs.dur       | >= | 7.80971937             |         | 0            | 1150         |      |
| ALK.times.uln | <  | 6.02173913 TBILI.resultn  | =  | Missing                |         | -0.001717944 | 1150         |      |
| ALK.times.uln | <  | 6.02173913 TBILI.resultn  | <  | 2.75                   |         | -0.001844499 | 1150         |      |
| ALK.times.uln | <  | 6.02173913 TBILI.resultn  | >= | 2.75                   |         | 0.000111351  | 1150         |      |
| ALK.times.uln | >= | 6.02173913                |    |                        |         | -0.000490424 | 1150         |      |
| TBILI.resultn | =  | Missing                   |    |                        |         | -0.000908359 | 1151         |      |
| TBILI.resultn | <  | 1.65 age.yrs              | =  | Missing                |         | -0.00148723  | 1151         |      |
| TBILI.resultn | <  | 1.65 age.yrs              | <  | 63.30047912            |         | -0.001682277 | 1151         |      |
| TBILI.resultn | <  | 1.65 age.yrs              | >= | 63.30047912            |         | 0            | 1151         |      |
| TBILI.resultn | >= | 1.65 PLT.resultn          | =  | Missing                |         | -0.000391956 | 1151         |      |
| TBILI.resultn | >= | 1.65 PLT.resultn          | <  | 219                    |         | 0.000931801  | 1151         |      |
| TBILI.resultn | >= | 1.65 PLT.resultn          | >= | 219                    |         | -0.001158341 | 1151         |      |
| ALK.times.uln | =  | Missing                   |    |                        | Missing | 0.000204388  | 1152         |      |
| ALK.times.uln | <  | 2.822501299               |    |                        | Missing | -0.00026062  | 1152         |      |

|                |    |             |                    |    |             |                    |              |              |              |      |
|----------------|----|-------------|--------------------|----|-------------|--------------------|--------------|--------------|--------------|------|
| ALK.times.uln  | >= | 2.822501299 | PLT.resultn        | =  | Missing     | Missing            | 0.001279127  | 1152         |              |      |
| ALK.times.uln  | >= | 2.822501299 | PLT.resultn        | <  | 209.5       | Missing            | 0.003072192  | 1152         |              |      |
| ALK.times.uln  | >= | 2.822501299 | PLT.resultn        | >= | 209.5       | AST.resultn        | =            | Missing      | 0.000820436  | 1152 |
| ALK.times.uln  | >= | 2.822501299 | PLT.resultn        | >= | 209.5       | AST.resultn        | <            | 66           | 0.002939894  | 1152 |
| ALK.times.uln  | >= | 2.822501299 | PLT.resultn        | >= | 209.5       | AST.resultn        | >=           | 66           | 0            | 1152 |
| Sodium.resultn | =  | Missing     |                    |    |             | Missing            | -0.00255755  | 1153         |              |      |
| Sodium.resultn | <  | 136.5       |                    |    |             | Missing            | -0.00027775  | 1153         |              |      |
| Sodium.resultn | >= | 136.5       | age.yrs            | =  | Missing     | Missing            | -0.002121883 | 1153         |              |      |
| Sodium.resultn | >= | 136.5       | age.yrs            | <  | 53.56194387 | Missing            | -0.002351446 | 1153         |              |      |
| Sodium.resultn | >= | 136.5       | age.yrs            | >= | 53.56194387 | AST.resultn        | =            | Missing      | -0.001566662 | 1153 |
| Sodium.resultn | >= | 136.5       | age.yrs            | >= | 53.56194387 | AST.resultn        | <            | 51           | -0.0029909   | 1153 |
| Sodium.resultn | >= | 136.5       | age.yrs            | >= | 53.56194387 | AST.resultn        | >=           | 51           | 0            | 1153 |
| PLT.resultn    | =  | Missing     |                    |    |             | Missing            | -0.000313535 | 1154         |              |      |
| PLT.resultn    | <  | 185.5       |                    |    |             | Missing            | 0.002096372  | 1154         |              |      |
| PLT.resultn    | >= | 185.5       | ALK.times.uln      | =  | Missing     | Missing            | -0.000159665 | 1154         |              |      |
| PLT.resultn    | >= | 185.5       | ALK.times.uln      | <  | 5.446215139 | Missing            | -0.001002878 | 1154         |              |      |
| PLT.resultn    | >= | 185.5       | ALK.times.uln      | >= | 5.446215139 | TBILL.resultn      | =            | Missing      | 0.00045163   | 1154 |
| PLT.resultn    | >= | 185.5       | ALK.times.uln      | >= | 5.446215139 | TBILL.resultn      | <            | 1.5          | 0.000948422  | 1154 |
| PLT.resultn    | >= | 185.5       | ALK.times.uln      | >= | 5.446215139 | TBILL.resultn      | >=           | 1.5          | 0            | 1154 |
| PLT.resultn    | =  | Missing     |                    |    |             | Missing            | -0.002658207 | 1155         |              |      |
| PLT.resultn    | <  | 185.5       |                    |    |             | Missing            | 1.17E-05     | 1155         |              |      |
| PLT.resultn    | >= | 185.5       | psc.yrs.dur        | =  | Missing     | Missing            | -0.001689971 | 1155         |              |      |
| PLT.resultn    | >= | 185.5       | psc.yrs.dur        | <  | 0.042436687 | ALB.resultn        | =            | Missing      | -0.000661331 | 1155 |
| PLT.resultn    | >= | 185.5       | psc.yrs.dur        | <  | 0.042436687 | ALB.resultn        | <            | 3.75         | -0.001743509 | 1155 |
| PLT.resultn    | >= | 185.5       | psc.yrs.dur        | <  | 0.042436687 | ALB.resultn        | >=           | 3.75         | 0            | 1155 |
| PLT.resultn    | >= | 185.5       | psc.yrs.dur        | >= | 0.042436687 |                    | Missing      | -0.001882465 | 1155         |      |
| AST.resultn    | =  | Missing     |                    |    |             | Missing            | -0.001653216 | 1156         |              |      |
| AST.resultn    | <  | 43.5        |                    |    |             | Missing            | -0.001663673 | 1156         |              |      |
| AST.resultn    | >= | 43.5        | psc.yrs.dur        | =  | Missing     | Missing            | -0.000264618 | 1156         |              |      |
| AST.resultn    | >= | 43.5        | psc.yrs.dur        | <  | 8.067077344 | Hemoglobin.resultn | =            | Missing      | 0            | 1156 |
| AST.resultn    | >= | 43.5        | psc.yrs.dur        | <  | 8.067077344 | Hemoglobin.resultn | <            | 13.75        | 0.000128299  | 1156 |
| AST.resultn    | >= | 43.5        | psc.yrs.dur        | <  | 8.067077344 | Hemoglobin.resultn | >=           | 13.75        | -0.001380757 | 1156 |
| AST.resultn    | >= | 43.5        | psc.yrs.dur        | >= | 8.067077344 |                    | Missing      | 0.002584393  | 1156         |      |
| ALK.times.uln  | =  | Missing     |                    |    |             |                    | 0.000425847  | 1157         |              |      |
| ALK.times.uln  | <  | 4.3981119   | TBILL.resultn      | =  | Missing     |                    | 0.000341461  | 1157         |              |      |
| ALK.times.uln  | <  | 4.3981119   | TBILL.resultn      | <  | 1.35        |                    | 0.000411839  | 1157         |              |      |
| ALK.times.uln  | <  | 4.3981119   | TBILL.resultn      | >= | 1.35        |                    | 0            | 1157         |              |      |
| ALK.times.uln  | >= | 4.3981119   | Hemoglobin.resultn | =  | Missing     |                    | 0.00160166   | 1157         |              |      |
| ALK.times.uln  | >= | 4.3981119   | Hemoglobin.resultn | <  | 13.55       |                    | 0.002069271  | 1157         |              |      |
| ALK.times.uln  | >= | 4.3981119   | Hemoglobin.resultn | >= | 13.55       |                    | 0.000619678  | 1157         |              |      |
| psc.yrs.dur    | =  | Missing     |                    |    |             | Missing            | 0.000854365  | 1158         |              |      |
| psc.yrs.dur    | <  | 0.004106776 |                    |    |             | Missing            | 0.002798107  | 1158         |              |      |
| psc.yrs.dur    | >= | 0.004106776 | psc.yrs.dur        | =  | Missing     | Missing            | 0.000688233  | 1158         |              |      |
| psc.yrs.dur    | >= | 0.004106776 | psc.yrs.dur        | <  | 7.817932923 | Missing            | 0.000416345  | 1158         |              |      |
| psc.yrs.dur    | >= | 0.004106776 | psc.yrs.dur        | >= | 7.817932923 | psc.yrs.dur        | =            | Missing      | 0.002863332  | 1158 |
| psc.yrs.dur    | >= | 0.004106776 | psc.yrs.dur        | >= | 7.817932923 | psc.yrs.dur        | <            | 10.65160849  | 0.006203887  | 1158 |
| psc.yrs.dur    | >= | 0.004106776 | psc.yrs.dur        | >= | 7.817932923 | psc.yrs.dur        | >=           | 10.65160849  | 0            | 1158 |
| age.yrs        | =  | Missing     |                    |    |             | Missing            | -0.001499006 | 1159         |              |      |
| age.yrs        | <  | 69.84257358 | PLT.resultn        | =  | Missing     | Missing            | -0.001625402 | 1159         |              |      |
| age.yrs        | <  | 69.84257358 | PLT.resultn        | <  | 248.5       | ALK.times.uln      | =            | Missing      | 0            | 1159 |
| age.yrs        | <  | 69.84257358 | PLT.resultn        | <  | 248.5       | ALK.times.uln      | <            | 3.573913043  | -0.002288669 | 1159 |
| age.yrs        | <  | 69.84257358 | PLT.resultn        | <  | 248.5       | ALK.times.uln      | >=           | 3.573913043  | 0.001605427  | 1159 |
| age.yrs        | <  | 69.84257358 | PLT.resultn        | >= | 248.5       |                    | Missing      | -0.001991474 | 1159         |      |
| age.yrs        | >= | 69.84257358 |                    |    |             | Missing            | 0.002069861  | 1159         |              |      |
| age.yrs        | =  | Missing     |                    |    |             | Missing            | 0.000263548  | 1160         |              |      |
| age.yrs        | <  | 69.76043806 | ALK.times.uln      | =  | Missing     | Missing            | 0.000244821  | 1160         |              |      |
| age.yrs        | <  | 69.76043806 | ALK.times.uln      | <  | 4.313155378 | Missing            | -0.000204951 | 1160         |              |      |
| age.yrs        | <  | 69.76043806 | ALK.times.uln      | >= | 4.313155378 | PLT.resultn        | =            | Missing      | 0.000887101  | 1160 |
| age.yrs        | <  | 69.76043806 | ALK.times.uln      | >= | 4.313155378 | PLT.resultn        | <            | 267.5        | 0.002154388  | 1160 |
| age.yrs        | <  | 69.76043806 | ALK.times.uln      | >= | 4.313155378 | PLT.resultn        | >=           | 267.5        | 0            | 1160 |
| age.yrs        | >= | 69.76043806 |                    |    |             | Missing            | 0.004859268  | 1160         |              |      |
| Sodium.resultn | =  | Missing     | TBILL.resultn      | =  | Missing     |                    | -0.001359693 | 1161         |              |      |

|                |    |             |               |    |             |                    |         |             |  |              |      |
|----------------|----|-------------|---------------|----|-------------|--------------------|---------|-------------|--|--------------|------|
| Sodium.resultn | =  | Missing     | TBILI.resultn | <  | 1.25        |                    |         |             |  | -0.001724983 | 1161 |
| Sodium.resultn | =  | Missing     | TBILI.resultn | >= | 1.25        |                    |         |             |  | 0            | 1161 |
| Sodium.resultn | <  | 136.5       | TBILI.resultn | =  | Missing     |                    |         |             |  | 0.000585735  | 1161 |
| Sodium.resultn | <  | 136.5       | TBILI.resultn | <  | 0.85        |                    |         |             |  | -0.000760333 | 1161 |
| Sodium.resultn | <  | 136.5       | TBILI.resultn | >= | 0.85        |                    |         |             |  | 0.001931804  | 1161 |
| Sodium.resultn | >= | 136.5       |               |    |             |                    |         |             |  | -0.000956072 | 1161 |
| ALB.resultn    | =  | Missing     |               |    |             |                    | Missing |             |  | -5.97E-05    | 1162 |
| ALB.resultn    | <  | 2.95        |               |    |             |                    | Missing |             |  | 0.001174489  | 1162 |
| ALB.resultn    | >= | 2.95        | psc.yrs.dur   | =  | Missing     |                    | Missing |             |  | -0.000295499 | 1162 |
| ALB.resultn    | >= | 2.95        | psc.yrs.dur   | <  | 7.404517454 |                    | Missing |             |  | -0.000520231 | 1162 |
| ALB.resultn    | >= | 2.95        | psc.yrs.dur   | >= | 7.404517454 | Sodium.resultn     | =       | Missing     |  | 0.00158053   | 1162 |
| ALB.resultn    | >= | 2.95        | psc.yrs.dur   | >= | 7.404517454 | Sodium.resultn     | <       | 139.5       |  | 0.003017375  | 1162 |
| ALB.resultn    | >= | 2.95        | psc.yrs.dur   | >= | 7.404517454 | Sodium.resultn     | >=      | 139.5       |  | 0            | 1162 |
| TBILI.resultn  | =  | Missing     |               |    |             |                    |         | Missing     |  | 0.001481099  | 1163 |
| TBILI.resultn  | <  | 1.65        |               |    |             |                    |         | Missing     |  | 0.000597525  | 1163 |
| TBILI.resultn  | >= | 1.65        | PLT.resultn   | =  | Missing     |                    |         | Missing     |  | 0.001613016  | 1163 |
| TBILI.resultn  | >= | 1.65        | PLT.resultn   | <  | 219         |                    |         | Missing     |  | 0.003535914  | 1163 |
| TBILI.resultn  | >= | 1.65        | PLT.resultn   | >= | 219         | Hemoglobin.resultn | =       | Missing     |  | 0.000690024  | 1163 |
| TBILI.resultn  | >= | 1.65        | PLT.resultn   | >= | 219         | Hemoglobin.resultn | <       | 13.1        |  | 0.001442778  | 1163 |
| TBILI.resultn  | >= | 1.65        | PLT.resultn   | >= | 219         | Hemoglobin.resultn | >=      | 13.1        |  | 0            | 1163 |
| age.yrs        | =  | Missing     |               |    |             |                    |         | Missing     |  | -0.002918305 | 1164 |
| age.yrs        | <  | 53.20054757 |               |    |             |                    |         | Missing     |  | -0.003116015 | 1164 |
| age.yrs        | >= | 53.20054757 | AST.resultn   | =  | Missing     |                    |         | Missing     |  | -0.002343426 | 1164 |
| age.yrs        | >= | 53.20054757 | AST.resultn   | <  | 51          |                    |         | Missing     |  | -0.003520945 | 1164 |
| age.yrs        | >= | 53.20054757 | AST.resultn   | >= | 51          | psc.yrs.dur        | =       | Missing     |  | -0.001087406 | 1164 |
| age.yrs        | >= | 53.20054757 | AST.resultn   | >= | 51          | psc.yrs.dur        | <       | 0.741957563 |  | -0.001716957 | 1164 |
| age.yrs        | >= | 53.20054757 | AST.resultn   | >= | 51          | psc.yrs.dur        | >=      | 0.741957563 |  | 0            | 1164 |
| ALB.resultn    | =  | Missing     |               |    |             |                    |         | Missing     |  | -0.000492043 | 1165 |
| ALB.resultn    | <  | 2.95        |               |    |             |                    |         | Missing     |  | 0.000931357  | 1165 |
| ALB.resultn    | >= | 2.95        | TBILI.resultn | =  | Missing     |                    |         | Missing     |  | -0.00054596  | 1165 |
| ALB.resultn    | >= | 2.95        | TBILI.resultn | <  | 0.95        |                    |         | Missing     |  | -0.001101616 | 1165 |
| ALB.resultn    | >= | 2.95        | TBILI.resultn | >= | 0.95        | Sodium.resultn     | =       | Missing     |  | 0            | 1165 |
| ALB.resultn    | >= | 2.95        | TBILI.resultn | >= | 0.95        | Sodium.resultn     | <       | 138.5       |  | 0.002426314  | 1165 |
| ALB.resultn    | >= | 2.95        | TBILI.resultn | >= | 0.95        | Sodium.resultn     | >=      | 138.5       |  | -0.000185932 | 1165 |
| ALB.resultn    | =  | Missing     |               |    |             |                    |         | Missing     |  | -0.001579367 | 1166 |
| ALB.resultn    | <  | 3.05        |               |    |             |                    |         | Missing     |  | 0.000168564  | 1166 |
| ALB.resultn    | >= | 3.05        | psc.yrs.dur   | =  | Missing     |                    |         | Missing     |  | -0.002061795 | 1166 |
| ALB.resultn    | >= | 3.05        | psc.yrs.dur   | <  | 2.043805613 |                    |         | Missing     |  | -0.002380025 | 1166 |
| ALB.resultn    | >= | 3.05        | psc.yrs.dur   | >= | 2.043805613 | age.yrs            | =       | Missing     |  | -0.001420855 | 1166 |
| ALB.resultn    | >= | 3.05        | psc.yrs.dur   | >= | 2.043805613 | age.yrs            | <       | 55.4825462  |  | -0.001868161 | 1166 |
| ALB.resultn    | >= | 3.05        | psc.yrs.dur   | >= | 2.043805613 | age.yrs            | >=      | 55.4825462  |  | 0            | 1166 |
| ALB.resultn    | =  | Missing     |               |    |             |                    |         | Missing     |  | -0.001878171 | 1167 |
| ALB.resultn    | <  | 3.15        |               |    |             |                    |         | Missing     |  | 0.000234101  | 1167 |
| ALB.resultn    | >= | 3.15        | TBILI.resultn | =  | Missing     |                    |         | Missing     |  | -0.00136914  | 1167 |
| ALB.resultn    | >= | 3.15        | TBILI.resultn | <  | 2           | Hemoglobin.resultn | =       | Missing     |  | 0            | 1167 |
| ALB.resultn    | >= | 3.15        | TBILI.resultn | <  | 2           | Hemoglobin.resultn | <       | 14.85       |  | -0.001876624 | 1167 |
| ALB.resultn    | >= | 3.15        | TBILI.resultn | <  | 2           | Hemoglobin.resultn | >=      | 14.85       |  | -0.001892424 | 1167 |
| ALB.resultn    | >= | 3.15        | TBILI.resultn | >= | 2           |                    |         | Missing     |  | 1.89E-05     | 1167 |
| psc.yrs.dur    | =  | Missing     |               |    |             |                    |         |             |  | 0.000530261  | 1168 |
| psc.yrs.dur    | <  | 6.410677618 | AST.resultn   | =  | Missing     |                    |         |             |  | 0.000455669  | 1168 |
| psc.yrs.dur    | <  | 6.410677618 | AST.resultn   | <  | 72.5        |                    |         |             |  | 0.000738736  | 1168 |
| psc.yrs.dur    | <  | 6.410677618 | AST.resultn   | >= | 72.5        |                    |         |             |  | 0            | 1168 |
| psc.yrs.dur    | >= | 6.410677618 | AST.resultn   | =  | Missing     |                    |         |             |  | 0.00101292   | 1168 |
| psc.yrs.dur    | >= | 6.410677618 | AST.resultn   | <  | 43          |                    |         |             |  | -0.000444349 | 1168 |
| psc.yrs.dur    | >= | 6.410677618 | AST.resultn   | >= | 43          |                    |         |             |  | 0.002086697  | 1168 |
| TBILI.resultn  | =  | Missing     |               |    |             |                    |         |             |  | -0.001163285 | 1169 |
| TBILI.resultn  | <  | 1.65        | AST.resultn   | =  | Missing     |                    |         |             |  | -0.00058772  | 1169 |
| TBILI.resultn  | <  | 1.65        | AST.resultn   | <  | 47.5        |                    |         |             |  | -0.001151931 | 1169 |
| TBILI.resultn  | <  | 1.65        | AST.resultn   | >= | 47.5        |                    |         |             |  | 0            | 1169 |
| TBILI.resultn  | >= | 1.65        | PLT.resultn   | =  | Missing     |                    |         |             |  | 0.000675616  | 1169 |
| TBILI.resultn  | >= | 1.65        | PLT.resultn   | <  | 217         |                    |         |             |  | 0.002541612  | 1169 |
| TBILI.resultn  | >= | 1.65        | PLT.resultn   | >= | 217         |                    |         |             |  | -0.000301811 | 1169 |

|               |    |                           |    |                            |    |             |              |      |
|---------------|----|---------------------------|----|----------------------------|----|-------------|--------------|------|
| PLT.resultn   | =  | Missing                   |    |                            |    | Missing     | -0.003436803 | 1170 |
| PLT.resultn   | <  | 249.5 AST.resultn         | =  | Missing                    |    | Missing     | -0.002300558 | 1170 |
| PLT.resultn   | <  | 249.5 AST.resultn         | <  | 54.5                       |    | Missing     | -0.003784679 | 1170 |
| PLT.resultn   | <  | 249.5 AST.resultn         | >= | 54.5 age.yrs               | =  | Missing     | -0.001212203 | 1170 |
| PLT.resultn   | <  | 249.5 AST.resultn         | >= | 54.5 age.yrs               | <  | 51.58521561 | -0.002020339 | 1170 |
| PLT.resultn   | <  | 249.5 AST.resultn         | >= | 54.5 age.yrs               | >= | 51.58521561 | 0            | 1170 |
| PLT.resultn   | >= | 249.5                     |    |                            |    | Missing     | -0.003552256 | 1170 |
| ALB.resultn   | =  | Missing                   |    |                            |    | Missing     | -2.00E-05    | 1171 |
| ALB.resultn   | <  | 3.135                     |    |                            |    | Missing     | 0.003674314  | 1171 |
| ALB.resultn   | >= | 3.135 PLT.resultn         | =  | Missing                    |    | Missing     | -1.57E-05    | 1171 |
| ALB.resultn   | >= | 3.135 PLT.resultn         | <  | 206.5 Hemoglobin.resultn   | =  | Missing     | 0.001181223  | 1171 |
| ALB.resultn   | >= | 3.135 PLT.resultn         | <  | 206.5 Hemoglobin.resultn   | <  | 14.1        | 0.002834934  | 1171 |
| ALB.resultn   | >= | 3.135 PLT.resultn         | <  | 206.5 Hemoglobin.resultn   | >= | 14.1        | 0            | 1171 |
| ALB.resultn   | >= | 3.135 PLT.resultn         | >= | 206.5                      |    | Missing     | 0.000503125  | 1171 |
| ALB.resultn   | =  | Missing                   |    |                            |    |             | -0.000464944 | 1172 |
| ALB.resultn   | <  | 3.615 TBILL.resultn       | =  | Missing                    |    |             | 0.000819132  | 1172 |
| ALB.resultn   | <  | 3.615 TBILL.resultn       | <  | 1.31                       |    |             | 6.48E-05     | 1172 |
| ALB.resultn   | <  | 3.615 TBILL.resultn       | >= | 1.31                       |    |             | 0.002010123  | 1172 |
| ALB.resultn   | >= | 3.615 Sodium.resultn      | =  | Missing                    |    |             | 0            | 1172 |
| ALB.resultn   | >= | 3.615 Sodium.resultn      | <  | 137.5                      |    |             | 0.002507561  | 1172 |
| ALB.resultn   | >= | 3.615 Sodium.resultn      | >= | 137.5                      |    |             | -0.000466599 | 1172 |
| TBILL.resultn | =  | Missing                   |    |                            |    |             | -0.00522027  | 1173 |
| TBILL.resultn | <  | 1.95 age.yrs              | =  | Missing                    |    |             | -0.004376099 | 1173 |
| TBILL.resultn | <  | 1.95 age.yrs              | <  | 69.84257358                |    |             | -0.004612065 | 1173 |
| TBILL.resultn | <  | 1.95 age.yrs              | >= | 69.84257358                |    |             | 0            | 1173 |
| TBILL.resultn | >= | 1.95 Hemoglobin.resultn   | =  | Missing                    |    |             | -0.004084699 | 1173 |
| TBILL.resultn | >= | 1.95 Hemoglobin.resultn   | <  | 12.9                       |    |             | -0.003130489 | 1173 |
| TBILL.resultn | >= | 1.95 Hemoglobin.resultn   | >= | 12.9                       |    |             | -0.00522975  | 1173 |
| ALB.resultn   | =  | Missing                   |    |                            |    | Missing     | -0.001416692 | 1174 |
| ALB.resultn   | <  | 3.13                      |    |                            |    | Missing     | 0.000600359  | 1174 |
| ALB.resultn   | >= | 3.13 TBILL.resultn        | =  | Missing                    |    | Missing     | -0.000865996 | 1174 |
| ALB.resultn   | >= | 3.13 TBILL.resultn        | <  | 2 psc.yrs.dur              | =  | Missing     | -0.000994634 | 1174 |
| ALB.resultn   | >= | 3.13 TBILL.resultn        | <  | 2 psc.yrs.dur              | <  | 2.131416838 | -0.00143024  | 1174 |
| ALB.resultn   | >= | 3.13 TBILL.resultn        | <  | 2 psc.yrs.dur              | >= | 2.131416838 | 0            | 1174 |
| ALB.resultn   | >= | 3.13 TBILL.resultn        | >= | 2                          |    | Missing     | 0.001083361  | 1174 |
| ALK.times.uln | =  | Missing TBILL.resultn     | =  | Missing                    |    |             | -0.001522622 | 1175 |
| ALK.times.uln | =  | Missing TBILL.resultn     | <  | 1.55                       |    |             | -0.000888384 | 1175 |
| ALK.times.uln | =  | Missing TBILL.resultn     | >= | 1.55                       |    |             | 0.001477664  | 1175 |
| ALK.times.uln | <  | 5.462893197 TBILL.resultn | =  | Missing                    |    |             | -0.00100064  | 1175 |
| ALK.times.uln | <  | 5.462893197 TBILL.resultn | <  | 1.65                       |    |             | -0.00109445  | 1175 |
| ALK.times.uln | <  | 5.462893197 TBILL.resultn | >= | 1.65                       |    |             | 0            | 1175 |
| ALK.times.uln | >= | 5.462893197               |    |                            |    |             | 0.001777781  | 1175 |
| age.yrs       | =  | Missing                   |    |                            |    |             | 0.001030084  | 1176 |
| age.yrs       | <  | 62.21629021 PLT.resultn   | =  | Missing                    |    |             | 0            | 1176 |
| age.yrs       | <  | 62.21629021 PLT.resultn   | <  | 203.5                      |    |             | 0.000253092  | 1176 |
| age.yrs       | <  | 62.21629021 PLT.resultn   | >= | 203.5                      |    |             | 0.001067468  | 1176 |
| age.yrs       | >= | 62.21629021 AST.resultn   | =  | Missing                    |    |             | 0.002342718  | 1176 |
| age.yrs       | >= | 62.21629021 AST.resultn   | <  | 51                         |    |             | 2.29E-05     | 1176 |
| age.yrs       | >= | 62.21629021 AST.resultn   | >= | 51                         |    |             | 0.004372518  | 1176 |
| age.yrs       | =  | Missing                   |    |                            |    | Missing     | -0.000620511 | 1177 |
| age.yrs       | <  | 53.38261465               |    |                            |    | Missing     | -0.000945116 | 1177 |
| age.yrs       | >= | 53.38261465 TBILL.resultn | =  | Missing                    |    | Missing     | 0.000304122  | 1177 |
| age.yrs       | >= | 53.38261465 TBILL.resultn | <  | 1.25 ALB.resultn           | =  | Missing     | -0.000735317 | 1177 |
| age.yrs       | >= | 53.38261465 TBILL.resultn | <  | 1.25 ALB.resultn           | <  | 4.05        | -0.001566545 | 1177 |
| age.yrs       | >= | 53.38261465 TBILL.resultn | <  | 1.25 ALB.resultn           | >= | 4.05        | 0            | 1177 |
| age.yrs       | >= | 53.38261465 TBILL.resultn | >= | 1.25                       |    | Missing     | 0.005605261  | 1177 |
| psc.yrs.dur   | =  | Missing                   |    |                            |    | Missing     | 0.000575921  | 1178 |
| psc.yrs.dur   | <  | 13.4934976 age.yrs        | =  | Missing                    |    | Missing     | 0.000437615  | 1178 |
| psc.yrs.dur   | <  | 13.4934976 age.yrs        | <  | 69.76043806 Sodium.resultn | =  | Missing     | 0            | 1178 |
| psc.yrs.dur   | <  | 13.4934976 age.yrs        | <  | 69.76043806 Sodium.resultn | <  | 140.5       | 0.000954839  | 1178 |
| psc.yrs.dur   | <  | 13.4934976 age.yrs        | <  | 69.76043806 Sodium.resultn | >= | 140.5       | -4.18E-05    | 1178 |
| psc.yrs.dur   | <  | 13.4934976 age.yrs        | >= | 69.76043806                |    | Missing     | 0.002384351  | 1178 |

|                |    |             |                    |    |             |                    |              |              |              |      |
|----------------|----|-------------|--------------------|----|-------------|--------------------|--------------|--------------|--------------|------|
| psc.yrs.dur    | >= | 13.4934976  |                    |    |             | Missing            | 0.003950586  | 1178         |              |      |
| Sodium.resultn | =  | Missing     |                    |    |             |                    | -0.002127204 | 1179         |              |      |
| Sodium.resultn | <  | 136.5       | Sodium.resultn     | =  | Missing     |                    | -0.000159652 | 1179         |              |      |
| Sodium.resultn | <  | 136.5       | Sodium.resultn     | <  | 135.5       |                    | -0.001653367 | 1179         |              |      |
| Sodium.resultn | <  | 136.5       | Sodium.resultn     | >= | 135.5       |                    | 0.001483435  | 1179         |              |      |
| Sodium.resultn | >= | 136.5       | Hemoglobin.resultn | =  | Missing     |                    | 0            | 1179         |              |      |
| Sodium.resultn | >= | 136.5       | Hemoglobin.resultn | <  | 11.95       |                    | -0.002011137 | 1179         |              |      |
| Sodium.resultn | >= | 136.5       | Hemoglobin.resultn | >= | 11.95       |                    | -0.002078776 | 1179         |              |      |
| TBILL.resultn  | =  | Missing     |                    |    |             | Missing            | 0.001663349  | 1180         |              |      |
| TBILL.resultn  | <  | 1.65        |                    |    |             | Missing            | 0.000694718  | 1180         |              |      |
| TBILL.resultn  | >= | 1.65        | PLT.resultn        | =  | Missing     | Missing            | 0.00172647   | 1180         |              |      |
| TBILL.resultn  | >= | 1.65        | PLT.resultn        | <  | 205         | Missing            | 0.003888949  | 1180         |              |      |
| TBILL.resultn  | >= | 1.65        | PLT.resultn        | >= | 205         | Hemoglobin.resultn | =            | Missing      | 0.00064523   | 1180 |
| TBILL.resultn  | >= | 1.65        | PLT.resultn        | >= | 205         | Hemoglobin.resultn | <            | 12.95        | 0.001349118  | 1180 |
| TBILL.resultn  | >= | 1.65        | PLT.resultn        | >= | 205         | Hemoglobin.resultn | >=           | 12.95        | 0            | 1180 |
| ALB.resultn    | =  | Missing     |                    |    |             | Missing            | -0.002068471 | 1181         |              |      |
| ALB.resultn    | <  | 3.105       |                    |    |             | Missing            | -0.000800971 | 1181         |              |      |
| ALB.resultn    | >= | 3.105       | PLT.resultn        | =  | Missing     | Missing            | -0.002086794 | 1181         |              |      |
| ALB.resultn    | >= | 3.105       | PLT.resultn        | <  | 249.5       | age.yrs            | =            | Missing      | -0.001609045 | 1181 |
| ALB.resultn    | >= | 3.105       | PLT.resultn        | <  | 249.5       | age.yrs            | <            | 53.46475017  | -0.002222014 | 1181 |
| ALB.resultn    | >= | 3.105       | PLT.resultn        | <  | 249.5       | age.yrs            | >=           | 53.46475017  | 0            | 1181 |
| ALB.resultn    | >= | 3.105       | PLT.resultn        | >= | 249.5       |                    | Missing      | -0.002629939 | 1181         |      |
| ALK.times.uln  | =  | Missing     |                    |    |             | Missing            | 0.000965569  | 1182         |              |      |
| ALK.times.uln  | <  | 5.92438247  | TBILL.resultn      | =  | Missing     | Missing            | 0.000400083  | 1182         |              |      |
| ALK.times.uln  | <  | 5.92438247  | TBILL.resultn      | <  | 1.65        | Missing            | 0.000284554  | 1182         |              |      |
| ALK.times.uln  | <  | 5.92438247  | TBILL.resultn      | >= | 1.65        | Hemoglobin.resultn | =            | Missing      | 0.001079396  | 1182 |
| ALK.times.uln  | <  | 5.92438247  | TBILL.resultn      | >= | 1.65        | Hemoglobin.resultn | <            | 13.3         | 0.002266731  | 1182 |
| ALK.times.uln  | <  | 5.92438247  | TBILL.resultn      | >= | 1.65        | Hemoglobin.resultn | >=           | 13.3         | 0            | 1182 |
| ALK.times.uln  | >= | 5.92438247  |                    |    |             | Missing            | 0.002357143  | 1182         |              |      |
| age.yrs        | =  | Missing     |                    |    |             |                    | -0.001221642 | 1183         |              |      |
| age.yrs        | <  | 54.3504449  | TBILL.resultn      | =  | Missing     |                    | 0            | 1183         |              |      |
| age.yrs        | <  | 54.3504449  | TBILL.resultn      | <  | 1.35        |                    | -0.001468057 | 1183         |              |      |
| age.yrs        | <  | 54.3504449  | TBILL.resultn      | >= | 1.35        |                    | -0.002059286 | 1183         |              |      |
| age.yrs        | >= | 54.3504449  | TBILL.resultn      | =  | Missing     |                    | -0.000402545 | 1183         |              |      |
| age.yrs        | >= | 54.3504449  | TBILL.resultn      | <  | 1.31        |                    | -0.00109826  | 1183         |              |      |
| age.yrs        | >= | 54.3504449  | TBILL.resultn      | >= | 1.31        |                    | 0.002949538  | 1183         |              |      |
| PLT.resultn    | =  | Missing     |                    |    |             | Missing            | -0.001370775 | 1184         |              |      |
| PLT.resultn    | <  | 170         |                    |    |             | Missing            | 0.001195541  | 1184         |              |      |
| PLT.resultn    | >= | 170         | age.yrs            | =  | Missing     | Missing            | -0.001852127 | 1184         |              |      |
| PLT.resultn    | >= | 170         | age.yrs            | <  | 51.53319644 |                    | Missing      | -0.00211064  | 1184         |      |
| PLT.resultn    | >= | 170         | age.yrs            | >= | 51.53319644 | AST.resultn        | =            | Missing      | -0.001287377 | 1184 |
| PLT.resultn    | >= | 170         | age.yrs            | >= | 51.53319644 | AST.resultn        | <            | 57           | -0.002317278 | 1184 |
| PLT.resultn    | >= | 170         | age.yrs            | >= | 51.53319644 | AST.resultn        | >=           | 57           | 0            | 1184 |
| age.yrs        | =  | Missing     |                    |    |             | Missing            | -0.000564279 | 1185         |              |      |
| age.yrs        | <  | 67.72895277 | Sodium.resultn     | =  | Missing     | Missing            | -0.000995233 | 1185         |              |      |
| age.yrs        | <  | 67.72895277 | Sodium.resultn     | <  | 136.5       | Missing            | 0.000665173  | 1185         |              |      |
| age.yrs        | <  | 67.72895277 | Sodium.resultn     | >= | 136.5       | Hemoglobin.resultn | =            | Missing      | 0            | 1185 |
| age.yrs        | <  | 67.72895277 | Sodium.resultn     | >= | 136.5       | Hemoglobin.resultn | <            | 11.95        | -0.001230501 | 1185 |
| age.yrs        | <  | 67.72895277 | Sodium.resultn     | >= | 136.5       | Hemoglobin.resultn | >=           | 11.95        | -0.000906353 | 1185 |
| age.yrs        | >= | 67.72895277 |                    |    |             | Missing            | 0.003835823  | 1185         |              |      |
| psc.yrs.dur    | =  | Missing     |                    |    |             |                    | -0.000807948 | 1186         |              |      |
| psc.yrs.dur    | <  | 8.026009582 | TBILL.resultn      | =  | Missing     |                    | 0            | 1186         |              |      |
| psc.yrs.dur    | <  | 8.026009582 | TBILL.resultn      | <  | 3.15        |                    | -0.000936923 | 1186         |              |      |
| psc.yrs.dur    | <  | 8.026009582 | TBILL.resultn      | >= | 3.15        |                    | -0.00179402  | 1186         |              |      |
| psc.yrs.dur    | >= | 8.026009582 | ALB.resultn        | =  | Missing     |                    | 0.000410098  | 1186         |              |      |
| psc.yrs.dur    | >= | 8.026009582 | ALB.resultn        | <  | 3.95        |                    | 0.000917673  | 1186         |              |      |
| psc.yrs.dur    | >= | 8.026009582 | ALB.resultn        | >= | 3.95        |                    | -0.000148235 | 1186         |              |      |
| PLT.resultn    | =  | Missing     |                    |    |             |                    | -0.000365672 | 1187         |              |      |
| PLT.resultn    | <  | 209.5       | Hemoglobin.resultn | =  | Missing     |                    | 0.000747161  | 1187         |              |      |
| PLT.resultn    | <  | 209.5       | Hemoglobin.resultn | <  | 13.8        |                    | 0.002914554  | 1187         |              |      |
| PLT.resultn    | <  | 209.5       | Hemoglobin.resultn | >= | 13.8        |                    | -0.000938589 | 1187         |              |      |
| PLT.resultn    | >= | 209.5       | ALK.times.uln      | =  | Missing     |                    | 0            | 1187         |              |      |

|               |    |                                |    |                            |         |             |              |              |      |
|---------------|----|--------------------------------|----|----------------------------|---------|-------------|--------------|--------------|------|
| PLT.resultn   | >= | 209.5 ALK.times.uln            | <  | 5.462893197                |         |             | -0.000765821 | 1187         |      |
| PLT.resultn   | >= | 209.5 ALK.times.uln            | >= | 5.462893197                |         |             | 0.00102779   | 1187         |      |
| age.yrs       | =  | Missing                        |    |                            |         | Missing     | 0.000821231  | 1188         |      |
| age.yrs       | <  | 70.7008898 Sodium.resultn      | =  | Missing                    |         | Missing     | 0.000334163  | 1188         |      |
| age.yrs       | <  | 70.7008898 Sodium.resultn      | <  | 138.5 ALK.times.uln        | =       | Missing     | 0            | 1188         |      |
| age.yrs       | <  | 70.7008898 Sodium.resultn      | <  | 138.5 ALK.times.uln        | <       | 2.795652174 | 0.001491603  | 1188         |      |
| age.yrs       | <  | 70.7008898 Sodium.resultn      | <  | 138.5 ALK.times.uln        | >=      | 2.795652174 | 0.002714919  | 1188         |      |
| age.yrs       | <  | 70.7008898 Sodium.resultn      | >= | 138.5                      |         | Missing     | 0.000577785  | 1188         |      |
| age.yrs       | >= | 70.7008898                     |    |                            |         | Missing     | 0.004162653  | 1188         |      |
| TBILL.resultn | =  | Missing                        |    |                            |         | Missing     | -0.000967016 | 1189         |      |
| TBILL.resultn | <  | 1.05                           |    |                            |         | Missing     | -0.001713136 | 1189         |      |
| TBILL.resultn | >= | 1.05 Hemoglobin.resultn        | =  | Missing                    |         | Missing     | 0.00081508   | 1189         |      |
| TBILL.resultn | >= | 1.05 Hemoglobin.resultn        | <  | 13.35 ALK.times.uln        | =       | Missing     | -0.00013395  | 1189         |      |
| TBILL.resultn | >= | 1.05 Hemoglobin.resultn        | <  | 13.35 ALK.times.uln        | <       | 4.342610778 | -0.000232181 | 1189         |      |
| TBILL.resultn | >= | 1.05 Hemoglobin.resultn        | <  | 13.35 ALK.times.uln        | >=      | 4.342610778 | 0            | 1189         |      |
| TBILL.resultn | >= | 1.05 Hemoglobin.resultn        | >= | 13.35                      |         | Missing     | -0.001585228 | 1189         |      |
| psc.yrs.dur   | =  | Missing                        |    |                            |         |             | 5.05E-05     | 1190         |      |
| psc.yrs.dur   | <  | 7.823408624 Hemoglobin.resultn | =  | Missing                    |         |             | 0            | 1190         |      |
| psc.yrs.dur   | <  | 7.823408624 Hemoglobin.resultn | <  | 10.95                      |         |             | -0.000595126 | 1190         |      |
| psc.yrs.dur   | <  | 7.823408624 Hemoglobin.resultn | >= | 10.95                      |         |             | -7.06E-05    | 1190         |      |
| psc.yrs.dur   | >= | 7.823408624 ALB.resultn        | =  | Missing                    |         |             | 0.001242099  | 1190         |      |
| psc.yrs.dur   | >= | 7.823408624 ALB.resultn        | <  | 3.95                       |         |             | 0.002299175  | 1190         |      |
| psc.yrs.dur   | >= | 7.823408624 ALB.resultn        | >= | 3.95                       |         |             | 0.000185023  | 1190         |      |
| age.yrs       | =  | Missing                        |    |                            |         | Missing     | -0.004896366 | 1191         |      |
| age.yrs       | <  | 51.63175907                    |    |                            |         | Missing     | -0.005155381 | 1191         |      |
| age.yrs       | >= | 51.63175907 AST.resultn        | =  | Missing                    |         | Missing     | -0.004278185 | 1191         |      |
| age.yrs       | >= | 51.63175907 AST.resultn        | <  | 52.5                       |         | Missing     | -0.005652687 | 1191         |      |
| age.yrs       | >= | 51.63175907 AST.resultn        | >= | 52.5 psc.yrs.dur           | =       | Missing     | -0.002517103 | 1191         |      |
| age.yrs       | >= | 51.63175907 AST.resultn        | >= | 52.5 psc.yrs.dur           | <       | 0.73100616  | -0.004738076 | 1191         |      |
| age.yrs       | >= | 51.63175907 AST.resultn        | >= | 52.5 psc.yrs.dur           | >=      | 0.73100616  | 0            | 1191         |      |
| psc.yrs.dur   | =  | Missing                        |    |                            |         | Missing     | -0.004608888 | 1192         |      |
| psc.yrs.dur   | <  | 0.824093087                    |    |                            |         | Missing     | -0.00503326  | 1192         |      |
| psc.yrs.dur   | >= | 0.824093087 age.yrs            | =  | Missing                    |         | Missing     | -0.004025872 | 1192         |      |
| psc.yrs.dur   | >= | 0.824093087 age.yrs            | <  | 53.4715948                 |         | Missing     | -0.004571515 | 1192         |      |
| psc.yrs.dur   | >= | 0.824093087 age.yrs            | >= | 53.4715948 AST.resultn     | =       | Missing     | -0.002688166 | 1192         |      |
| psc.yrs.dur   | >= | 0.824093087 age.yrs            | >= | 53.4715948 AST.resultn     | <       | 57          | -0.005376333 | 1192         |      |
| psc.yrs.dur   | >= | 0.824093087 age.yrs            | >= | 53.4715948 AST.resultn     | >=      | 57          | 0            | 1192         |      |
| AST.resultn   | =  | Missing                        |    |                            |         | Missing     | -0.000512499 | 1193         |      |
| AST.resultn   | <  | 184.5 age.yrs                  | =  | Missing                    |         | Missing     | 0.000390611  | 1193         |      |
| AST.resultn   | <  | 184.5 age.yrs                  | <  | 69.70978782 Sodium.resultn | =       | Missing     | 0            | 1193         |      |
| AST.resultn   | <  | 184.5 age.yrs                  | <  | 69.70978782 Sodium.resultn | <       | 136.5       | 0.001735502  | 1193         |      |
| AST.resultn   | <  | 184.5 age.yrs                  | <  | 69.70978782 Sodium.resultn | >=      | 136.5       | 0.000188391  | 1193         |      |
| AST.resultn   | <  | 184.5 age.yrs                  | >= | 69.70978782                |         | Missing     | 0.003455058  | 1193         |      |
| AST.resultn   | >= | 184.5                          |    |                            |         | Missing     | 0.002635693  | 1193         |      |
| TBILL.resultn | =  | Missing                        |    |                            |         | Missing     | 0.00320726   | 1194         |      |
| TBILL.resultn | <  | 5 age.yrs                      | =  | Missing                    |         | Missing     | 0.000670941  | 1194         |      |
| TBILL.resultn | <  | 5 age.yrs                      | <  | 69.84257358 ALB.resultn    | =       | Missing     | 0            | 1194         |      |
| TBILL.resultn | <  | 5 age.yrs                      | <  | 69.84257358 ALB.resultn    | <       | 3.27        | 3.46E-06     | 1194         |      |
| TBILL.resultn | <  | 5 age.yrs                      | <  | 69.84257358 ALB.resultn    | >=      | 3.27        | 0.000582951  | 1194         |      |
| TBILL.resultn | <  | 5 age.yrs                      | >= | 69.84257358                |         | Missing     | 0.003963845  | 1194         |      |
| TBILL.resultn | >= | 5                              |    |                            |         | Missing     | 0.002829467  | 1194         |      |
| ALB.resultn   | =  | Missing                        |    |                            |         | Missing     | -0.000939086 | 1195         |      |
| ALB.resultn   | <  | 3.615 PLT.resultn              | =  | Missing                    |         | Missing     | -0.000694617 | 1195         |      |
| ALB.resultn   | <  | 3.615 PLT.resultn              | <  | 219.5                      |         | Missing     | 0.000418266  | 1195         |      |
| ALB.resultn   | <  | 3.615 PLT.resultn              | >= | 219.5 PLT.resultn          | =       | Missing     | -0.001046054 | 1195         |      |
| ALB.resultn   | <  | 3.615 PLT.resultn              | >= | 219.5 PLT.resultn          | <       | 395.5       | -0.001419645 | 1195         |      |
| ALB.resultn   | <  | 3.615 PLT.resultn              | >= | 219.5 PLT.resultn          | >=      | 395.5       | 0            | 1195         |      |
| ALB.resultn   | >= | 3.615                          |    |                            |         | Missing     | -0.001567289 | 1195         |      |
| TBILL.resultn | =  | Missing                        |    |                            |         | Missing     | -0.000590913 | 1196         |      |
| TBILL.resultn | <  | 2.55 ALK.times.uln             | =  | Missing                    | age.yrs | =           | Missing      | -0.002008985 | 1196 |
| TBILL.resultn | <  | 2.55 ALK.times.uln             | =  | Missing                    | age.yrs | <           | 56.0752909   | -0.002611681 | 1196 |
| TBILL.resultn | <  | 2.55 ALK.times.uln             | =  | Missing                    | age.yrs | >=          | 56.0752909   | 0            | 1196 |



|               |    |             |                    |    |             |               |              |              |              |      |
|---------------|----|-------------|--------------------|----|-------------|---------------|--------------|--------------|--------------|------|
| TBILI.resultn | <  | 2.55        | ALK.times.uln      | <  | 3.635579421 | Missing       | -0.002619926 | 1196         |              |      |
| TBILI.resultn | <  | 2.55        | ALK.times.uln      | >= | 3.635579421 | Missing       | -0.001125624 | 1196         |              |      |
| TBILI.resultn | >= | 2.55        |                    |    |             | Missing       | -0.000711119 | 1196         |              |      |
| psc.yrs.dur   | =  | Missing     |                    |    |             |               | -0.003170803 | 1197         |              |      |
| psc.yrs.dur   | <  | 6.324435318 | age.yrs            | =  | Missing     |               | -0.003323453 | 1197         |              |      |
| psc.yrs.dur   | <  | 6.324435318 | age.yrs            | <  | 69.70978782 |               | -0.003520886 | 1197         |              |      |
| psc.yrs.dur   | <  | 6.324435318 | age.yrs            | >= | 69.70978782 |               | 0            | 1197         |              |      |
| psc.yrs.dur   | >= | 6.324435318 | AST.resultn        | =  | Missing     |               | -0.002354122 | 1197         |              |      |
| psc.yrs.dur   | >= | 6.324435318 | AST.resultn        | <  | 89.5        |               | -0.002743366 | 1197         |              |      |
| psc.yrs.dur   | >= | 6.324435318 | AST.resultn        | >= | 89.5        |               | -0.00126424  | 1197         |              |      |
| ALB.resultn   | =  | Missing     |                    |    |             |               | 0.000949245  | 1198         |              |      |
| ALB.resultn   | <  | 3.31        | TBILI.resultn      | =  | Missing     |               | 0.001364248  | 1198         |              |      |
| ALB.resultn   | <  | 3.31        | TBILI.resultn      | <  | 1.31        |               | 0.000633155  | 1198         |              |      |
| ALB.resultn   | <  | 3.31        | TBILI.resultn      | >= | 1.31        |               | 0.002339039  | 1198         |              |      |
| ALB.resultn   | >= | 3.31        | TBILI.resultn      | =  | Missing     |               | 0.000689174  | 1198         |              |      |
| ALB.resultn   | >= | 3.31        | TBILI.resultn      | <  | 2.55        |               | 0.000726834  | 1198         |              |      |
| ALB.resultn   | >= | 3.31        | TBILI.resultn      | >= | 2.55        |               | 0            | 1198         |              |      |
| ALK.times.uln | =  | Missing     | TBILI.resultn      | =  | Missing     |               | -0.001111935 | 1199         |              |      |
| ALK.times.uln | =  | Missing     | TBILI.resultn      | <  | 0.95        |               | -0.001102184 | 1199         |              |      |
| ALK.times.uln | =  | Missing     | TBILI.resultn      | >= | 0.95        |               | 0.001535803  | 1199         |              |      |
| ALK.times.uln | <  | 5.438574341 |                    |    |             |               | -0.000567464 | 1199         |              |      |
| ALK.times.uln | >= | 5.438574341 | ALK.times.uln      | =  | Missing     |               | 0.000945509  | 1199         |              |      |
| ALK.times.uln | >= | 5.438574341 | ALK.times.uln      | <  | 7.794978567 |               | 0.001891018  | 1199         |              |      |
| ALK.times.uln | >= | 5.438574341 | ALK.times.uln      | >= | 7.794978567 |               | 0            | 1199         |              |      |
| AST.resultn   | =  | Missing     |                    |    |             | Missing       | -1.27E-05    | 1200         |              |      |
| AST.resultn   | <  | 213.5       | Hemoglobin.resultn | =  | Missing     | ALB.resultn   | =            | Missing      | 0.000880337  | 1200 |
| AST.resultn   | <  | 213.5       | Hemoglobin.resultn | =  | Missing     | ALB.resultn   | <            | 3.95         | 0.002475949  | 1200 |
| AST.resultn   | <  | 213.5       | Hemoglobin.resultn | =  | Missing     | ALB.resultn   | >=           | 3.95         | 0            | 1200 |
| AST.resultn   | <  | 213.5       | Hemoglobin.resultn | <  | 12.35       |               | Missing      | 0.000329977  | 1200         |      |
| AST.resultn   | <  | 213.5       | Hemoglobin.resultn | >= | 12.35       |               | Missing      | 0.000995761  | 1200         |      |
| AST.resultn   | >= | 213.5       |                    |    |             |               | Missing      | 0.00314294   | 1200         |      |
| PLT.resultn   | =  | Missing     |                    |    |             |               | Missing      | -0.000766939 | 1201         |      |
| PLT.resultn   | <  | 248.5       | ALK.times.uln      | =  | Missing     | TBILI.resultn | =            | Missing      | -0.001156942 | 1201 |
| PLT.resultn   | <  | 248.5       | ALK.times.uln      | =  | Missing     | TBILI.resultn | <            | 0.95         | -0.002005366 | 1201 |
| PLT.resultn   | <  | 248.5       | ALK.times.uln      | =  | Missing     | TBILI.resultn | >=           | 0.95         | 0            | 1201 |
| PLT.resultn   | <  | 248.5       | ALK.times.uln      | <  | 3.309946654 |               | Missing      | -0.001441022 | 1201         |      |
| PLT.resultn   | <  | 248.5       | ALK.times.uln      | >= | 3.309946654 |               | Missing      | 0.001312972  | 1201         |      |
| PLT.resultn   | >= | 248.5       |                    |    |             |               | Missing      | -0.001833485 | 1201         |      |
| TBILI.resultn | =  | Missing     |                    |    |             |               | Missing      | -0.000972216 | 1202         |      |
| TBILI.resultn | <  | 1.25        |                    |    |             |               | Missing      | -0.002118592 | 1202         |      |
| TBILI.resultn | >= | 1.25        | Hemoglobin.resultn | =  | Missing     |               | Missing      | 0.000927628  | 1202         |      |
| TBILI.resultn | >= | 1.25        | Hemoglobin.resultn | <  | 12.2        |               | Missing      | -0.001761772 | 1202         |      |
| TBILI.resultn | >= | 1.25        | Hemoglobin.resultn | >= | 12.2        | ALK.times.uln | =            | Missing      | -0.00114683  | 1202 |
| TBILI.resultn | >= | 1.25        | Hemoglobin.resultn | >= | 12.2        | ALK.times.uln | <            | 3.003845488  | -0.002470096 | 1202 |
| TBILI.resultn | >= | 1.25        | Hemoglobin.resultn | >= | 12.2        | ALK.times.uln | >=           | 3.003845488  | 0            | 1202 |
| age.yrs       | =  | Missing     |                    |    |             |               | Missing      | -0.002404374 | 1203         |      |
| age.yrs       | <  | 69.84257358 | PLT.resultn        | =  | Missing     |               | Missing      | -0.002913637 | 1203         |      |
| age.yrs       | <  | 69.84257358 | PLT.resultn        | <  | 204.5       | TBILI.resultn | =            | Missing      | -0.002045003 | 1203 |
| age.yrs       | <  | 69.84257358 | PLT.resultn        | <  | 204.5       | TBILI.resultn | <            | 1.65         | -0.002750176 | 1203 |
| age.yrs       | <  | 69.84257358 | PLT.resultn        | <  | 204.5       | TBILI.resultn | >=           | 1.65         | 0            | 1203 |
| age.yrs       | <  | 69.84257358 | PLT.resultn        | >= | 204.5       |               | Missing      | -0.002608464 | 1203         |      |
| age.yrs       | >= | 69.84257358 |                    |    |             |               | Missing      | 0.001201886  | 1203         |      |
| ALB.resultn   | =  | Missing     |                    |    |             |               | Missing      | -0.003202695 | 1204         |      |
| ALB.resultn   | <  | 3.03        |                    |    |             |               | Missing      | -0.000927232 | 1204         |      |
| ALB.resultn   | >= | 3.03        | TBILI.resultn      | =  | Missing     |               | Missing      | -0.002621108 | 1204         |      |
| ALB.resultn   | >= | 3.03        | TBILI.resultn      | <  | 0.95        |               | Missing      | -0.003045184 | 1204         |      |
| ALB.resultn   | >= | 3.03        | TBILI.resultn      | >= | 0.95        | psc.yrs.dur   | =            | Missing      | -0.001869081 | 1204 |
| ALB.resultn   | >= | 3.03        | TBILI.resultn      | >= | 0.95        | psc.yrs.dur   | <            | 7.404517454  | -0.002156632 | 1204 |
| ALB.resultn   | >= | 3.03        | TBILI.resultn      | >= | 0.95        | psc.yrs.dur   | >=           | 7.404517454  | 0            | 1204 |
| ALB.resultn   | =  | Missing     |                    |    |             |               | Missing      | 0.001326362  | 1205         |      |
| ALB.resultn   | <  | 3.105       |                    |    |             |               | Missing      | 0.001909487  | 1205         |      |
| ALB.resultn   | >= | 3.105       | psc.yrs.dur        | =  | Missing     |               | Missing      | 0.000502015  | 1205         |      |

|                |    |                           |    |                                |             |             |              |             |      |
|----------------|----|---------------------------|----|--------------------------------|-------------|-------------|--------------|-------------|------|
| ALB.resultn    | >= | 3.105 psc.yrs.dur         | <  | 6.410677618                    |             | Missing     | 0.000301184  | 1205        |      |
| ALB.resultn    | >= | 3.105 psc.yrs.dur         | >= | 6.410677618 psc.yrs.dur        | =           | Missing     | 0.001915554  | 1205        |      |
| ALB.resultn    | >= | 3.105 psc.yrs.dur         | >= | 6.410677618 psc.yrs.dur        | <           | 9.876796715 | 0.00498044   | 1205        |      |
| ALB.resultn    | >= | 3.105 psc.yrs.dur         | >= | 6.410677618 psc.yrs.dur        | >=          | 9.876796715 | 0            | 1205        |      |
| Sodium.resultn | =  | Missing                   |    |                                |             | Missing     | 0.000815838  | 1206        |      |
| Sodium.resultn | <  | 136.5                     |    |                                |             | Missing     | 0.002359935  | 1206        |      |
| Sodium.resultn | >= | 136.5 Hemoglobin.resultn  | =  | Missing                        | ALB.resultn | =           | Missing      | 0.000987809 | 1206 |
| Sodium.resultn | >= | 136.5 Hemoglobin.resultn  | =  | Missing                        | ALB.resultn | <           | 3.95         | 0.003053228 | 1206 |
| Sodium.resultn | >= | 136.5 Hemoglobin.resultn  | =  | Missing                        | ALB.resultn | >=          | 3.95         | 0           | 1206 |
| Sodium.resultn | >= | 136.5 Hemoglobin.resultn  | <  | 12.95                          |             | Missing     | 0.000225468  | 1206        |      |
| Sodium.resultn | >= | 136.5 Hemoglobin.resultn  | >= | 12.95                          |             | Missing     | 0.001047571  | 1206        |      |
| age.yrs        | =  | Missing                   |    |                                |             | Missing     | -0.001083355 | 1207        |      |
| age.yrs        | <  | 53.46475017               |    |                                |             | Missing     | -0.001476109 | 1207        |      |
| age.yrs        | >= | 53.46475017 AST.resultn   | =  | Missing                        |             | Missing     | -0.00012801  | 1207        |      |
| age.yrs        | >= | 53.46475017 AST.resultn   | <  | 51.5                           |             | Missing     | -0.001780089 | 1207        |      |
| age.yrs        | >= | 53.46475017 AST.resultn   | >= | 51.5 PLT.resultn               | =           | Missing     | 0.002468114  | 1207        |      |
| age.yrs        | >= | 53.46475017 AST.resultn   | >= | 51.5 PLT.resultn               | <           | 251         | 0.004407346  | 1207        |      |
| age.yrs        | >= | 53.46475017 AST.resultn   | >= | 51.5 PLT.resultn               | >=          | 251         | 0            | 1207        |      |
| Sodium.resultn | =  | Missing                   |    |                                |             | Missing     | -0.003114773 | 1208        |      |
| Sodium.resultn | <  | 138.5 ALK.times.uln       | =  | Missing                        |             | Missing     | -0.001605819 | 1208        |      |
| Sodium.resultn | <  | 138.5 ALK.times.uln       | <  | 3.838991859 Hemoglobin.resultn | =           | Missing     | -0.002301604 | 1208        |      |
| Sodium.resultn | <  | 138.5 ALK.times.uln       | <  | 3.838991859 Hemoglobin.resultn | <           | 14.25       | -0.003580273 | 1208        |      |
| Sodium.resultn | <  | 138.5 ALK.times.uln       | <  | 3.838991859 Hemoglobin.resultn | >=          | 14.25       | 0            | 1208        |      |
| Sodium.resultn | <  | 138.5 ALK.times.uln       | >= | 3.838991859                    |             | Missing     | 0.000635683  | 1208        |      |
| Sodium.resultn | >= | 138.5                     |    |                                |             | Missing     | -0.003023104 | 1208        |      |
| TBILL.resultn  | =  | Missing                   |    |                                |             | Missing     | 0.000833088  | 1209        |      |
| TBILL.resultn  | <  | 3.3 age.yrs               | =  | Missing                        |             | Missing     | -3.79E-05    | 1209        |      |
| TBILL.resultn  | <  | 3.3 age.yrs               | <  | 69.84257358 ALK.times.uln      | =           | Missing     | 0            | 1209        |      |
| TBILL.resultn  | <  | 3.3 age.yrs               | <  | 69.84257358 ALK.times.uln      | <           | 5.963877551 | -0.000240149 | 1209        |      |
| TBILL.resultn  | <  | 3.3 age.yrs               | <  | 69.84257358 ALK.times.uln      | >=          | 5.963877551 | 0.000955422  | 1209        |      |
| TBILL.resultn  | <  | 3.3 age.yrs               | >= | 69.84257358                    |             | Missing     | 0.00180313   | 1209        |      |
| TBILL.resultn  | >= | 3.3                       |    |                                |             | Missing     | 0.000999086  | 1209        |      |
| ALB.resultn    | =  | Missing                   |    |                                |             | Missing     | -0.002402539 | 1210        |      |
| ALB.resultn    | <  | 2.915                     |    |                                |             | Missing     | -0.000513072 | 1210        |      |
| ALB.resultn    | >= | 2.915 TBILL.resultn       | =  | Missing                        |             | Missing     | -0.002544258 | 1210        |      |
| ALB.resultn    | >= | 2.915 TBILL.resultn       | <  | 1.25                           |             | Missing     | -0.002823228 | 1210        |      |
| ALB.resultn    | >= | 2.915 TBILL.resultn       | >= | 1.25 Hemoglobin.resultn        | =           | Missing     | 0            | 1210        |      |
| ALB.resultn    | >= | 2.915 TBILL.resultn       | >= | 1.25 Hemoglobin.resultn        | <           | 13.25       | -0.001617904 | 1210        |      |
| ALB.resultn    | >= | 2.915 TBILL.resultn       | >= | 1.25 Hemoglobin.resultn        | >=          | 13.25       | -0.002646014 | 1210        |      |
| age.yrs        | =  | Missing                   |    |                                |             | Missing     | -9.70E-05    | 1211        |      |
| age.yrs        | <  | 71.28678987 ALK.times.uln | =  | Missing                        |             | Missing     | -0.000166488 | 1211        |      |
| age.yrs        | <  | 71.28678987 ALK.times.uln | <  | 2.795652174                    |             | Missing     | -0.000941224 | 1211        |      |
| age.yrs        | <  | 71.28678987 ALK.times.uln | >= | 2.795652174 TBILL.resultn      | =           | Missing     | 0.000942583  | 1211        |      |
| age.yrs        | <  | 71.28678987 ALK.times.uln | >= | 2.795652174 TBILL.resultn      | <           | 1.65        | 0.001391432  | 1211        |      |
| age.yrs        | <  | 71.28678987 ALK.times.uln | >= | 2.795652174 TBILL.resultn      | >=          | 1.65        | 0            | 1211        |      |
| age.yrs        | >= | 71.28678987               |    |                                |             | Missing     | 0.00344214   | 1211        |      |
| TBILL.resultn  | =  | Missing                   |    |                                |             |             | 0.000390083  | 1212        |      |
| TBILL.resultn  | <  | 1.55 Sodium.resultn       | =  | Missing                        |             |             | 0            | 1212        |      |
| TBILL.resultn  | <  | 1.55 Sodium.resultn       | <  | 137.5                          |             |             | 0.00135721   | 1212        |      |
| TBILL.resultn  | <  | 1.55 Sodium.resultn       | >= | 137.5                          |             |             | 7.59E-05     | 1212        |      |
| TBILL.resultn  | >= | 1.55 PLT.resultn          | =  | Missing                        |             |             | 0.00152431   | 1212        |      |
| TBILL.resultn  | >= | 1.55 PLT.resultn          | <  | 206.5                          |             |             | 0.003278741  | 1212        |      |
| TBILL.resultn  | >= | 1.55 PLT.resultn          | >= | 206.5                          |             |             | 0.000822538  | 1212        |      |
| PLT.resultn    | =  | Missing                   |    |                                |             | Missing     | -0.002373058 | 1213        |      |
| PLT.resultn    | <  | 185.5                     |    |                                |             | Missing     | 0.000624763  | 1213        |      |
| PLT.resultn    | >= | 185.5 Sodium.resultn      | =  | Missing                        |             | Missing     | -0.002451907 | 1213        |      |
| PLT.resultn    | >= | 185.5 Sodium.resultn      | <  | 138.5 ALK.times.uln            | =           | Missing     | -0.001178051 | 1213        |      |
| PLT.resultn    | >= | 185.5 Sodium.resultn      | <  | 138.5 ALK.times.uln            | <           | 2.795652174 | -0.001946344 | 1213        |      |
| PLT.resultn    | >= | 185.5 Sodium.resultn      | <  | 138.5 ALK.times.uln            | >=          | 2.795652174 | 0            | 1213        |      |
| PLT.resultn    | >= | 185.5 Sodium.resultn      | >= | 138.5                          |             | Missing     | -0.002541128 | 1213        |      |
| age.yrs        | =  | Missing                   |    |                                |             | Missing     | -0.002868913 | 1214        |      |
| age.yrs        | <  | 56.84188912               |    |                                |             | Missing     | -0.003003764 | 1214        |      |

|               |    |             |                    |    |                     |               |              |              |              |      |
|---------------|----|-------------|--------------------|----|---------------------|---------------|--------------|--------------|--------------|------|
| age.yrs       | >= | 56.84188912 | AST.resultn        | =  | Missing             | Missing       | -0.002274992 | 1214         |              |      |
| age.yrs       | >= | 56.84188912 | AST.resultn        | <  | 51.5                | Missing       | -0.003734901 | 1214         |              |      |
| age.yrs       | >= | 56.84188912 | AST.resultn        | >= | 51.5 psc.yrs.dur    | =             | Missing      | -0.000815083 | 1214         |      |
| age.yrs       | >= | 56.84188912 | AST.resultn        | >= | 51.5 psc.yrs.dur    | <             | 0.739219713  | -0.001442071 | 1214         |      |
| age.yrs       | >= | 56.84188912 | AST.resultn        | >= | 51.5 psc.yrs.dur    | >=            | 0.739219713  | 0            | 1214         |      |
| ALB.resultn   | =  | Missing     |                    |    |                     | Missing       | -0.000580067 | 1215         |              |      |
| ALB.resultn   | <  | 2.915       |                    |    |                     | Missing       | 0.002453906  | 1215         |              |      |
| ALB.resultn   | >= | 2.915       | Hemoglobin.resultn | =  | Missing             | Missing       | 0.001383739  | 1215         |              |      |
| ALB.resultn   | >= | 2.915       | Hemoglobin.resultn | <  | 13.75 TBILL.resultn | =             | Missing      | 0.000847099  | 1215         |      |
| ALB.resultn   | >= | 2.915       | Hemoglobin.resultn | <  | 13.75 TBILL.resultn | <             | 1.75         | 0.000975447  | 1215         |      |
| ALB.resultn   | >= | 2.915       | Hemoglobin.resultn | <  | 13.75 TBILL.resultn | >=            | 1.75         | 0            | 1215         |      |
| ALB.resultn   | >= | 2.915       | Hemoglobin.resultn | >= | 13.75               | Missing       | -0.000591317 | 1215         |              |      |
| ALB.resultn   | =  | Missing     |                    |    |                     | Missing       | -0.001899871 | 1216         |              |      |
| ALB.resultn   | <  | 2.965       |                    |    |                     | Missing       | 0.000560134  | 1216         |              |      |
| ALB.resultn   | >= | 2.965       | ALB.resultn        | =  | Missing             | Missing       | -0.001097064 | 1216         |              |      |
| ALB.resultn   | >= | 2.965       | ALB.resultn        | <  | 3.135               | Missing       | -0.001603563 | 1216         |              |      |
| ALB.resultn   | >= | 2.965       | ALB.resultn        | >= | 3.135 age.yrs       | =             | Missing      | -0.001065858 | 1216         |      |
| ALB.resultn   | >= | 2.965       | ALB.resultn        | >= | 3.135 age.yrs       | <             | 51.58521561  | -0.001489377 | 1216         |      |
| ALB.resultn   | >= | 2.965       | ALB.resultn        | >= | 3.135 age.yrs       | >=            | 51.58521561  | 0            | 1216         |      |
| ALB.resultn   | =  | Missing     |                    |    |                     | Missing       | -0.00167438  | 1217         |              |      |
| ALB.resultn   | <  | 2.95        |                    |    |                     | Missing       | 5.47E-05     | 1217         |              |      |
| ALB.resultn   | >= | 2.95        | psc.yrs.dur        | =  | Missing             | Missing       | -0.001952158 | 1217         |              |      |
| ALB.resultn   | >= | 2.95        | psc.yrs.dur        | <  | 1.961670089         | Missing       | -0.002279821 | 1217         |              |      |
| ALB.resultn   | >= | 2.95        | psc.yrs.dur        | >= | 1.961670089 age.yrs | =             | Missing      | -0.001219734 | 1217         |      |
| ALB.resultn   | >= | 2.95        | psc.yrs.dur        | >= | 1.961670089 age.yrs | <             | 51.9945243   | -0.002022974 | 1217         |      |
| ALB.resultn   | >= | 2.95        | psc.yrs.dur        | >= | 1.961670089 age.yrs | >=            | 51.9945243   | 0            | 1217         |      |
| PLT.resultn   | =  | Missing     |                    |    |                     | Missing       | 0.000569471  | 1218         |              |      |
| PLT.resultn   | <  | 249.5       | ALK.times.uln      | =  | Missing             | ALB.resultn   | =            | Missing      | 0.001123873  | 1218 |
| PLT.resultn   | <  | 249.5       | ALK.times.uln      | =  | Missing             | ALB.resultn   | <            | 3.95         | 0.002074843  | 1218 |
| PLT.resultn   | <  | 249.5       | ALK.times.uln      | =  | Missing             | ALB.resultn   | >=           | 3.95         | 0            | 1218 |
| PLT.resultn   | <  | 249.5       | ALK.times.uln      | <  | 2.905037968         | Missing       | 0.000225805  | 1218         |              |      |
| PLT.resultn   | <  | 249.5       | ALK.times.uln      | >= | 2.905037968         | Missing       | 0.00306327   | 1218         |              |      |
| PLT.resultn   | >= | 249.5       |                    |    |                     | Missing       | 0.00035042   | 1218         |              |      |
| ALB.resultn   | =  | Missing     |                    |    |                     | Missing       | -0.002575174 | 1219         |              |      |
| ALB.resultn   | <  | 3.615       | PLT.resultn        | =  | Missing             | Missing       | -0.001153433 | 1219         |              |      |
| ALB.resultn   | <  | 3.615       | PLT.resultn        | <  | 240.5               | Missing       | 0.000491175  | 1219         |              |      |
| ALB.resultn   | <  | 3.615       | PLT.resultn        | >= | 240.5               | ALK.times.uln | =            | Missing      | -0.001793003 | 1219 |
| ALB.resultn   | <  | 3.615       | PLT.resultn        | >= | 240.5               | ALK.times.uln | <            | 4.461734694  | -0.002572569 | 1219 |
| ALB.resultn   | <  | 3.615       | PLT.resultn        | >= | 240.5               | ALK.times.uln | >=           | 4.461734694  | 0            | 1219 |
| ALB.resultn   | >= | 3.615       |                    |    |                     | Missing       | -0.002021796 | 1219         |              |      |
| ALK.times.uln | =  | Missing     |                    |    |                     | Missing       | 0.000570405  | 1220         |              |      |
| ALK.times.uln | <  | 2.822501299 |                    |    |                     | Missing       | -0.000791615 | 1220         |              |      |
| ALK.times.uln | >= | 2.822501299 | PLT.resultn        | =  | Missing             | Missing       | 0.001090279  | 1220         |              |      |
| ALK.times.uln | >= | 2.822501299 | PLT.resultn        | <  | 211.5               | Missing       | 0.003068773  | 1220         |              |      |
| ALK.times.uln | >= | 2.822501299 | PLT.resultn        | >= | 211.5               | TBILL.resultn | =            | Missing      | 0.000650614  | 1220 |
| ALK.times.uln | >= | 2.822501299 | PLT.resultn        | >= | 211.5               | TBILL.resultn | <            | 1.5          | 0.001022393  | 1220 |
| ALK.times.uln | >= | 2.822501299 | PLT.resultn        | >= | 211.5               | TBILL.resultn | >=           | 1.5          | 0            | 1220 |
| psc.yrs.dur   | =  | Missing     |                    |    |                     | Missing       | -0.000985551 | 1221         |              |      |
| psc.yrs.dur   | <  | 1.924709103 |                    |    |                     | Missing       | -0.001234311 | 1221         |              |      |
| psc.yrs.dur   | >= | 1.924709103 | ALK.times.uln      | =  | Missing             | Missing       | -0.000446916 | 1221         |              |      |
| psc.yrs.dur   | >= | 1.924709103 | ALK.times.uln      | <  | 2.822501299         | Missing       | -0.001205341 | 1221         |              |      |
| psc.yrs.dur   | >= | 1.924709103 | ALK.times.uln      | >= | 2.822501299         | PLT.resultn   | =            | Missing      | 0.000459228  | 1221 |
| psc.yrs.dur   | >= | 1.924709103 | ALK.times.uln      | >= | 2.822501299         | PLT.resultn   | <            | 251.5        | 0.001193993  | 1221 |
| psc.yrs.dur   | >= | 1.924709103 | ALK.times.uln      | >= | 2.822501299         | PLT.resultn   | >=           | 251.5        | 0            | 1221 |
| PLT.resultn   | =  | Missing     |                    |    |                     | Missing       | -0.004564715 | 1222         |              |      |
| PLT.resultn   | <  | 185.5       | AST.resultn        | =  | Missing             |               | -0.001217337 | 1222         |              |      |
| PLT.resultn   | <  | 185.5       | AST.resultn        | <  | 65.5                |               | -0.002434675 | 1222         |              |      |
| PLT.resultn   | <  | 185.5       | AST.resultn        | >= | 65.5                |               | 0            | 1222         |              |      |
| PLT.resultn   | >= | 185.5       | TBILL.resultn      | =  | Missing             |               | -0.00402953  | 1222         |              |      |
| PLT.resultn   | >= | 185.5       | TBILL.resultn      | <  | 1.55                |               | -0.004166396 | 1222         |              |      |
| PLT.resultn   | >= | 185.5       | TBILL.resultn      | >= | 1.55                |               | -0.003145165 | 1222         |              |      |
| age.yrs       | =  | Missing     |                    |    |                     | Missing       | -0.00309655  | 1223         |              |      |

|                    |    |             |                    |    |             |                |              |              |              |      |
|--------------------|----|-------------|--------------------|----|-------------|----------------|--------------|--------------|--------------|------|
| age.yrs            | <  | 53.46475017 |                    |    |             | Missing        | -0.003326601 | 1223         |              |      |
| age.yrs            | >= | 53.46475017 | AST.resultn        | =  | Missing     | Missing        | -0.002526148 | 1223         |              |      |
| age.yrs            | >= | 53.46475017 | AST.resultn        | <  | 51          | Missing        | -0.003782869 | 1223         |              |      |
| age.yrs            | >= | 53.46475017 | AST.resultn        | >= | 51          | psc.yrs.dur    | =            | Missing      | -0.001494993 | 1223 |
| age.yrs            | >= | 53.46475017 | AST.resultn        | >= | 51          | psc.yrs.dur    | <            | 0.741957563  | -0.002650214 | 1223 |
| age.yrs            | >= | 53.46475017 | AST.resultn        | >= | 51          | psc.yrs.dur    | >=           | 0.741957563  | 0            | 1223 |
| Sodium.resultn     | =  | Missing     |                    |    |             | Missing        | -0.001531413 | 1224         |              |      |
| Sodium.resultn     | <  | 141.5       | ALB.resultn        | =  | Missing     | Missing        | -0.000360621 | 1224         |              |      |
| Sodium.resultn     | <  | 141.5       | ALB.resultn        | <  | 3.31        | Missing        | 0.000810666  | 1224         |              |      |
| Sodium.resultn     | <  | 141.5       | ALB.resultn        | >= | 3.31        | TBILL.resultn  | =            | Missing      | -0.000563343 | 1224 |
| Sodium.resultn     | <  | 141.5       | ALB.resultn        | >= | 3.31        | TBILL.resultn  | <            | 0.75         | -0.001526957 | 1224 |
| Sodium.resultn     | <  | 141.5       | ALB.resultn        | >= | 3.31        | TBILL.resultn  | >=           | 0.75         | 0            | 1224 |
| Sodium.resultn     | >= | 141.5       |                    |    |             | Missing        | -0.00117292  | 1224         |              |      |
| psc.yrs.dur        | =  | Missing     |                    |    |             | Missing        | 0.000739541  | 1225         |              |      |
| psc.yrs.dur        | <  | 2.043805613 |                    |    |             | Missing        | 0.000554721  | 1225         |              |      |
| psc.yrs.dur        | >= | 2.043805613 | TBILL.resultn      | =  | Missing     | Missing        | 0.001206725  | 1225         |              |      |
| psc.yrs.dur        | >= | 2.043805613 | TBILL.resultn      | <  | 2.05        | Sodium.resultn | =            | Missing      | 0            | 1225 |
| psc.yrs.dur        | >= | 2.043805613 | TBILL.resultn      | <  | 2.05        | Sodium.resultn | <            | 140.5        | 0.002515187  | 1225 |
| psc.yrs.dur        | >= | 2.043805613 | TBILL.resultn      | <  | 2.05        | Sodium.resultn | >=           | 140.5        | 1.71E-05     | 1225 |
| psc.yrs.dur        | >= | 2.043805613 | TBILL.resultn      | >= | 2.05        |                | Missing      | 0.002383292  | 1225         |      |
| ALK.times.uln      | =  | Missing     | age.yrs            | =  | Missing     |                | -0.003130496 | 1226         |              |      |
| ALK.times.uln      | =  | Missing     | age.yrs            | <  | 62.32580424 |                | -0.003439417 | 1226         |              |      |
| ALK.times.uln      | =  | Missing     | age.yrs            | >= | 62.32580424 |                | -0.001431427 | 1226         |              |      |
| ALK.times.uln      | <  | 5.462893197 | ALB.resultn        | =  | Missing     |                | 0            | 1226         |              |      |
| ALK.times.uln      | <  | 5.462893197 | ALB.resultn        | <  | 3.595       |                | -0.00309016  | 1226         |              |      |
| ALK.times.uln      | <  | 5.462893197 | ALB.resultn        | >= | 3.595       |                | -0.002791436 | 1226         |              |      |
| ALK.times.uln      | >= | 5.462893197 |                    |    |             |                | -0.001284773 | 1226         |              |      |
| ALB.resultn        | =  | Missing     |                    |    |             | Missing        | -0.001328516 | 1227         |              |      |
| ALB.resultn        | <  | 3.615       | Hemoglobin.resultn | =  | Missing     | Missing        | 0.000617696  | 1227         |              |      |
| ALB.resultn        | <  | 3.615       | Hemoglobin.resultn | <  | 13.5        | Sodium.resultn | =            | Missing      | 0.00154587   | 1227 |
| ALB.resultn        | <  | 3.615       | Hemoglobin.resultn | <  | 13.5        | Sodium.resultn | <            | 138.5        | 0.004075475  | 1227 |
| ALB.resultn        | <  | 3.615       | Hemoglobin.resultn | <  | 13.5        | Sodium.resultn | >=           | 138.5        | 0            | 1227 |
| ALB.resultn        | <  | 3.615       | Hemoglobin.resultn | >= | 13.5        |                | Missing      | -0.001354672 | 1227         |      |
| ALB.resultn        | >= | 3.615       |                    |    |             | Missing        | -0.000569623 | 1227         |              |      |
| Hemoglobin.resultn | =  | Missing     |                    |    |             | Missing        | -0.003394748 | 1228         |              |      |
| Hemoglobin.resultn | <  | 12.65       |                    |    |             | Missing        | -0.00458103  | 1228         |              |      |
| Hemoglobin.resultn | >= | 12.65       | Sodium.resultn     | =  | Missing     | Missing        | -0.004986863 | 1228         |              |      |
| Hemoglobin.resultn | >= | 12.65       | Sodium.resultn     | <  | 138.5       | ALK.times.uln  | =            | Missing      | -0.002492852 | 1228 |
| Hemoglobin.resultn | >= | 12.65       | Sodium.resultn     | <  | 138.5       | ALK.times.uln  | <            | 2.781735492  | -0.004985703 | 1228 |
| Hemoglobin.resultn | >= | 12.65       | Sodium.resultn     | <  | 138.5       | ALK.times.uln  | >=           | 2.781735492  | 0            | 1228 |
| Hemoglobin.resultn | >= | 12.65       | Sodium.resultn     | >= | 138.5       |                | Missing      | -0.00441196  | 1228         |      |
| ALB.resultn        | =  | Missing     |                    |    |             | Missing        | -0.001266059 | 1229         |              |      |
| ALB.resultn        | <  | 2.95        |                    |    |             | Missing        | 0.000960139  | 1229         |              |      |
| ALB.resultn        | >= | 2.95        | TBILL.resultn      | =  | Missing     | Missing        | -0.000538317 | 1229         |              |      |
| ALB.resultn        | >= | 2.95        | TBILL.resultn      | <  | 0.75        |                | Missing      | -0.001268222 | 1229         |      |
| ALB.resultn        | >= | 2.95        | TBILL.resultn      | >= | 0.75        | Sodium.resultn | =            | Missing      | 0            | 1229 |
| ALB.resultn        | >= | 2.95        | TBILL.resultn      | >= | 0.75        | Sodium.resultn | <            | 137.5        | 0.002498511  | 1229 |
| ALB.resultn        | >= | 2.95        | TBILL.resultn      | >= | 0.75        | Sodium.resultn | >=           | 137.5        | -0.000367616 | 1229 |
| TBILL.resultn      | =  | Missing     |                    |    |             | Missing        | 0.00084828   | 1230         |              |      |
| TBILL.resultn      | <  | 0.95        |                    |    |             | Missing        | -0.001624317 | 1230         |              |      |
| TBILL.resultn      | >= | 0.95        | Hemoglobin.resultn | =  | Missing     | Missing        | 0.00176211   | 1230         |              |      |
| TBILL.resultn      | >= | 0.95        | Hemoglobin.resultn | <  | 14.85       | ALB.resultn    | =            | Missing      | -0.000725323 | 1230 |
| TBILL.resultn      | >= | 0.95        | Hemoglobin.resultn | <  | 14.85       | ALB.resultn    | <            | 4.065        | -0.001343191 | 1230 |
| TBILL.resultn      | >= | 0.95        | Hemoglobin.resultn | <  | 14.85       | ALB.resultn    | >=           | 4.065        | 0            | 1230 |
| TBILL.resultn      | >= | 0.95        | Hemoglobin.resultn | >= | 14.85       |                | Missing      | -0.000251989 | 1230         |      |
| ALB.resultn        | =  | Missing     |                    |    |             | Missing        | -0.002555598 | 1231         |              |      |
| ALB.resultn        | <  | 3.345       |                    |    |             | Missing        | -3.73E-05    | 1231         |              |      |
| ALB.resultn        | >= | 3.345       | Hemoglobin.resultn | =  | Missing     | TBILL.resultn  | =            | Missing      | -0.001227556 | 1231 |
| ALB.resultn        | >= | 3.345       | Hemoglobin.resultn | =  | Missing     | TBILL.resultn  | <            | 0.95         | -0.001923171 | 1231 |
| ALB.resultn        | >= | 3.345       | Hemoglobin.resultn | =  | Missing     | TBILL.resultn  | >=           | 0.95         | 0            | 1231 |
| ALB.resultn        | >= | 3.345       | Hemoglobin.resultn | <  | 15.45       |                | Missing      | -0.002301623 | 1231         |      |
| ALB.resultn        | >= | 3.345       | Hemoglobin.resultn | >= | 15.45       |                | Missing      | -0.001760661 | 1231         |      |

|                |    |                          |    |                                |             |             |              |             |      |
|----------------|----|--------------------------|----|--------------------------------|-------------|-------------|--------------|-------------|------|
| AST.resultn    | =  | Missing                  |    |                                |             | Missing     | -0.004191938 | 1232        |      |
| AST.resultn    | <  | 208 Sodium.resultn       | =  | Missing                        |             | Missing     | -0.003621893 | 1232        |      |
| AST.resultn    | <  | 208 Sodium.resultn       | <  | 136.5                          |             | Missing     | -0.001863291 | 1232        |      |
| AST.resultn    | <  | 208 Sodium.resultn       | >= | 136.5 age.yrs                  | =           | Missing     | -0.003697752 | 1232        |      |
| AST.resultn    | <  | 208 Sodium.resultn       | >= | 136.5 age.yrs                  | <           | 66.64750171 | -0.004000847 | 1232        |      |
| AST.resultn    | <  | 208 Sodium.resultn       | >= | 136.5 age.yrs                  | >=          | 66.64750171 | 0            | 1232        |      |
| AST.resultn    | >= | 208                      |    |                                |             | Missing     | 0.001600124  | 1232        |      |
| PLT.resultn    | =  | Missing                  |    |                                |             | Missing     | -0.001534238 | 1233        |      |
| PLT.resultn    | <  | 249.5 Hemoglobin.resultn | =  | Missing                        | ALB.resultn | =           | Missing      | 0.001629295 | 1233 |
| PLT.resultn    | <  | 249.5 Hemoglobin.resultn | =  | Missing                        | ALB.resultn | <           | 4            | 0.003421519 | 1233 |
| PLT.resultn    | <  | 249.5 Hemoglobin.resultn | =  | Missing                        | ALB.resultn | >=          | 4            | 0           | 1233 |
| PLT.resultn    | <  | 249.5 Hemoglobin.resultn | <  | 14.15                          |             | Missing     | 0.000344977  | 1233        |      |
| PLT.resultn    | <  | 249.5 Hemoglobin.resultn | >= | 14.15                          |             | Missing     | -0.001518838 | 1233        |      |
| PLT.resultn    | >= | 249.5                    |    |                                |             | Missing     | -0.001214595 | 1233        |      |
| TBILL.resultn  | =  | Missing                  |    |                                |             | Missing     | -0.000355633 | 1234        |      |
| TBILL.resultn  | <  | 0.85                     |    |                                |             | Missing     | -0.002106596 | 1234        |      |
| TBILL.resultn  | >= | 0.85 psc.yrs.dur         | =  | Missing                        |             | Missing     | -0.000852612 | 1234        |      |
| TBILL.resultn  | >= | 0.85 psc.yrs.dur         | <  | 6.783025325 Hemoglobin.resultn | =           | Missing     | 0            | 1234        |      |
| TBILL.resultn  | >= | 0.85 psc.yrs.dur         | <  | 6.783025325 Hemoglobin.resultn | <           | 12.75       | -0.000701737 | 1234        |      |
| TBILL.resultn  | >= | 0.85 psc.yrs.dur         | <  | 6.783025325 Hemoglobin.resultn | >=          | 12.75       | -0.001800308 | 1234        |      |
| TBILL.resultn  | >= | 0.85 psc.yrs.dur         | >= | 6.783025325                    |             | Missing     | 0.000381982  | 1234        |      |
| PLT.resultn    | =  | Missing                  |    |                                |             | Missing     | -0.007043399 | 1235        |      |
| PLT.resultn    | <  | 249.5 ALK.times.uln      | =  | Missing                        |             | Missing     | -0.005534581 | 1235        |      |
| PLT.resultn    | <  | 249.5 ALK.times.uln      | <  | 2.905037968                    |             | Missing     | -0.006290201 | 1235        |      |
| PLT.resultn    | <  | 249.5 ALK.times.uln      | >= | 2.905037968 psc.yrs.dur        | =           | Missing     | -0.001967473 | 1235        |      |
| PLT.resultn    | <  | 249.5 ALK.times.uln      | >= | 2.905037968 psc.yrs.dur        | <           | 1.264887064 | -0.004131694 | 1235        |      |
| PLT.resultn    | <  | 249.5 ALK.times.uln      | >= | 2.905037968 psc.yrs.dur        | >=          | 1.264887064 | 0            | 1235        |      |
| PLT.resultn    | >= | 249.5                    |    |                                |             | Missing     | -0.006774925 | 1235        |      |
| TBILL.resultn  | =  | Missing                  |    |                                |             |             | -0.002269629 | 1236        |      |
| TBILL.resultn  | <  | 1.65 age.yrs             | =  | Missing                        |             |             | -0.002796789 | 1236        |      |
| TBILL.resultn  | <  | 1.65 age.yrs             | <  | 69.90965092                    |             |             | -0.002937331 | 1236        |      |
| TBILL.resultn  | <  | 1.65 age.yrs             | >= | 69.90965092                    |             |             | 0            | 1236        |      |
| TBILL.resultn  | >= | 1.65 Hemoglobin.resultn  | =  | Missing                        |             |             | -0.001873597 | 1236        |      |
| TBILL.resultn  | >= | 1.65 Hemoglobin.resultn  | <  | 12.75                          |             |             | -0.000459706 | 1236        |      |
| TBILL.resultn  | >= | 1.65 Hemoglobin.resultn  | >= | 12.75                          |             |             | -0.003287489 | 1236        |      |
| Sodium.resultn | =  | Missing                  |    |                                |             | Missing     | -0.001021806 | 1237        |      |
| Sodium.resultn | <  | 143.5 ALK.times.uln      | =  | Missing                        |             | Missing     | 0.000172689  | 1237        |      |
| Sodium.resultn | <  | 143.5 ALK.times.uln      | <  | 2.795652174                    |             | Missing     | -0.000961179 | 1237        |      |
| Sodium.resultn | <  | 143.5 ALK.times.uln      | >= | 2.795652174 AST.resultn        | =           | Missing     | 0.000989161  | 1237        |      |
| Sodium.resultn | <  | 143.5 ALK.times.uln      | >= | 2.795652174 AST.resultn        | <           | 75.5        | 0.003659897  | 1237        |      |
| Sodium.resultn | <  | 143.5 ALK.times.uln      | >= | 2.795652174 AST.resultn        | >=          | 75.5        | 0            | 1237        |      |
| Sodium.resultn | >= | 143.5                    |    |                                |             | Missing     | -0.001060152 | 1237        |      |
| age.yrs        | =  | Missing                  |    |                                |             | Missing     | -0.002138394 | 1238        |      |
| age.yrs        | <  | 48.78302533              |    |                                |             | Missing     | -0.002333535 | 1238        |      |
| age.yrs        | >= | 48.78302533 AST.resultn  | =  | Missing                        |             | Missing     | -0.001776615 | 1238        |      |
| age.yrs        | >= | 48.78302533 AST.resultn  | <  | 51.5                           |             | Missing     | -0.002728749 | 1238        |      |
| age.yrs        | >= | 48.78302533 AST.resultn  | >= | 51.5 psc.yrs.dur               | =           | Missing     | -0.000887957 | 1238        |      |
| age.yrs        | >= | 48.78302533 AST.resultn  | >= | 51.5 psc.yrs.dur               | <           | 0.476386037 | -0.001816277 | 1238        |      |
| age.yrs        | >= | 48.78302533 AST.resultn  | >= | 51.5 psc.yrs.dur               | >=          | 0.476386037 | 0            | 1238        |      |
| TBILL.resultn  | =  | Missing                  |    |                                |             | Missing     | -0.004164157 | 1239        |      |
| TBILL.resultn  | <  | 2.75 age.yrs             | =  | Missing                        |             | Missing     | -0.003690902 | 1239        |      |
| TBILL.resultn  | <  | 2.75 age.yrs             | <  | 55.97809719                    |             | Missing     | -0.004030449 | 1239        |      |
| TBILL.resultn  | <  | 2.75 age.yrs             | >= | 55.97809719 AST.resultn        | =           | Missing     | -0.002317622 | 1239        |      |
| TBILL.resultn  | <  | 2.75 age.yrs             | >= | 55.97809719 AST.resultn        | <           | 51          | -0.00417172  | 1239        |      |
| TBILL.resultn  | <  | 2.75 age.yrs             | >= | 55.97809719 AST.resultn        | >=          | 51          | 0            | 1239        |      |
| TBILL.resultn  | >= | 2.75                     |    |                                |             | Missing     | -0.002479336 | 1239        |      |
| ALB.resultn    | =  | Missing                  |    |                                |             |             | 0.000200917  | 1240        |      |
| ALB.resultn    | <  | 3.31 PLT.resultn         | =  | Missing                        |             |             | 0.00072573   | 1240        |      |
| ALB.resultn    | <  | 3.31 PLT.resultn         | <  | 255                            |             |             | 0.001420524  | 1240        |      |
| ALB.resultn    | <  | 3.31 PLT.resultn         | >= | 255                            |             |             | 3.09E-05     | 1240        |      |
| ALB.resultn    | >= | 3.31 Sodium.resultn      | =  | Missing                        |             |             | 0            | 1240        |      |
| ALB.resultn    | >= | 3.31 Sodium.resultn      | <  | 137.5                          |             |             | 0.000978687  | 1240        |      |

|                |    |             |                    |    |             |               |         |              |              |      |
|----------------|----|-------------|--------------------|----|-------------|---------------|---------|--------------|--------------|------|
| ALB.resultn    | >= | 3.31        | Sodium.resultn     | >= | 137.5       |               |         | -0.000568704 | 1240         |      |
| ALK.times.uln  | =  | Missing     | TBILL.resultn      | =  | Missing     |               |         | -0.001759764 | 1241         |      |
| ALK.times.uln  | =  | Missing     | TBILL.resultn      | <  | 1.55        |               |         | -0.002171623 | 1241         |      |
| ALK.times.uln  | =  | Missing     | TBILL.resultn      | >= | 1.55        |               |         | 0            | 1241         |      |
| ALK.times.uln  | <  | 5.462893197 |                    |    |             |               |         | -0.00188506  | 1241         |      |
| ALK.times.uln  | >= | 5.462893197 | AST.resultn        | =  | Missing     |               |         | -0.000104125 | 1241         |      |
| ALK.times.uln  | >= | 5.462893197 | AST.resultn        | <  | 116         |               |         | 0.00107419   | 1241         |      |
| ALK.times.uln  | >= | 5.462893197 | AST.resultn        | >= | 116         |               |         | -0.001175321 | 1241         |      |
| ALB.resultn    | =  | Missing     |                    |    |             | Missing       |         | -0.002173675 | 1242         |      |
| ALB.resultn    | <  | 2.825       |                    |    |             | Missing       |         | -0.00068754  | 1242         |      |
| ALB.resultn    | >= | 2.825       | Hemoglobin.resultn | =  | Missing     | TBILL.resultn | =       | Missing      | -0.001784586 | 1242 |
| ALB.resultn    | >= | 2.825       | Hemoglobin.resultn | =  | Missing     | TBILL.resultn | <       | 0.95         | -0.002676879 | 1242 |
| ALB.resultn    | >= | 2.825       | Hemoglobin.resultn | =  | Missing     | TBILL.resultn | >=      | 0.95         | 0            | 1242 |
| ALB.resultn    | >= | 2.825       | Hemoglobin.resultn | <  | 13.05       |               | Missing | -0.00228678  | 1242         |      |
| ALB.resultn    | >= | 2.825       | Hemoglobin.resultn | >= | 13.05       |               | Missing | -0.00180356  | 1242         |      |
| AST.resultn    | =  | Missing     |                    |    |             |               | Missing | -0.00299173  | 1243         |      |
| AST.resultn    | <  | 213.5       | age.yrs            | =  | Missing     |               | Missing | -0.003122109 | 1243         |      |
| AST.resultn    | <  | 213.5       | age.yrs            | <  | 62.40930869 |               | Missing | -0.003313823 | 1243         |      |
| AST.resultn    | <  | 213.5       | age.yrs            | >= | 62.40930869 | AST.resultn   | =       | Missing      | -0.00190592  | 1243 |
| AST.resultn    | <  | 213.5       | age.yrs            | >= | 62.40930869 | AST.resultn   | <       | 53.5         | -0.003811841 | 1243 |
| AST.resultn    | <  | 213.5       | age.yrs            | >= | 62.40930869 | AST.resultn   | >=      | 53.5         | 0            | 1243 |
| AST.resultn    | >= | 213.5       |                    |    |             |               | Missing | -0.000206368 | 1243         |      |
| ALK.times.uln  | =  | Missing     | TBILL.resultn      | =  | Missing     |               |         | 0            | 1244         |      |
| ALK.times.uln  | =  | Missing     | TBILL.resultn      | <  | 1.55        |               |         | 0.000324285  | 1244         |      |
| ALK.times.uln  | =  | Missing     | TBILL.resultn      | >= | 1.55        |               |         | 0.001946333  | 1244         |      |
| ALK.times.uln  | <  | 5.462893197 |                    |    |             |               |         | 0.000581522  | 1244         |      |
| ALK.times.uln  | >= | 5.462893197 | ALK.times.uln      | =  | Missing     |               |         | 0.002080139  | 1244         |      |
| ALK.times.uln  | >= | 5.462893197 | ALK.times.uln      | <  | 7.794978567 |               |         | 0.003426339  | 1244         |      |
| ALK.times.uln  | >= | 5.462893197 | ALK.times.uln      | >= | 7.794978567 |               |         | 0.000464699  | 1244         |      |
| Sodium.resultn | =  | Missing     | TBILL.resultn      | =  | Missing     |               |         | -0.001467755 | 1245         |      |
| Sodium.resultn | =  | Missing     | TBILL.resultn      | <  | 1.25        |               |         | -0.001709284 | 1245         |      |
| Sodium.resultn | =  | Missing     | TBILL.resultn      | >= | 1.25        |               |         | 0            | 1245         |      |
| Sodium.resultn | <  | 138.5       | psc.yrs.dur        | =  | Missing     |               |         | 0.000146525  | 1245         |      |
| Sodium.resultn | <  | 138.5       | psc.yrs.dur        | <  | 1.890485969 |               |         | -0.000897934 | 1245         |      |
| Sodium.resultn | <  | 138.5       | psc.yrs.dur        | >= | 1.890485969 |               |         | 0.00207053   | 1245         |      |
| Sodium.resultn | >= | 138.5       |                    |    |             |               |         | -0.001106024 | 1245         |      |
| AST.resultn    | =  | Missing     |                    |    |             |               | Missing | -0.006423526 | 1246         |      |
| AST.resultn    | <  | 43          |                    |    |             |               | Missing | -0.006416336 | 1246         |      |
| AST.resultn    | >= | 43          | AST.resultn        | =  | Missing     |               | Missing | -0.004500241 | 1246         |      |
| AST.resultn    | >= | 43          | AST.resultn        | <  | 67          | TBILL.resultn | =       | Missing      | -0.001649835 | 1246 |
| AST.resultn    | >= | 43          | AST.resultn        | <  | 67          | TBILL.resultn | <       | 0.55         | -0.006434358 | 1246 |
| AST.resultn    | >= | 43          | AST.resultn        | <  | 67          | TBILL.resultn | >=      | 0.55         | 0            | 1246 |
| AST.resultn    | >= | 43          | AST.resultn        | >= | 67          |               | Missing | -0.005525386 | 1246         |      |
| TBILL.resultn  | =  | Missing     |                    |    |             |               |         | -0.000129702 | 1247         |      |
| TBILL.resultn  | <  | 1.95        | PLT.resultn        | =  | Missing     |               |         | 0            | 1247         |      |
| TBILL.resultn  | <  | 1.95        | PLT.resultn        | <  | 197.5       |               |         | 0.00048191   | 1247         |      |
| TBILL.resultn  | <  | 1.95        | PLT.resultn        | >= | 197.5       |               |         | -0.001046038 | 1247         |      |
| TBILL.resultn  | >= | 1.95        | age.yrs            | =  | Missing     |               |         | 0.000360298  | 1247         |      |
| TBILL.resultn  | >= | 1.95        | age.yrs            | <  | 50.0164271  |               |         | -0.000362417 | 1247         |      |
| TBILL.resultn  | >= | 1.95        | age.yrs            | >= | 50.0164271  |               |         | 0.000962561  | 1247         |      |
| AST.resultn    | =  | Missing     |                    |    |             |               | Missing | -0.001321215 | 1248         |      |
| AST.resultn    | <  | 43.5        |                    |    |             |               | Missing | -0.001349807 | 1248         |      |
| AST.resultn    | >= | 43.5        | TBILL.resultn      | =  | Missing     |               | Missing | -0.00016269  | 1248         |      |
| AST.resultn    | >= | 43.5        | TBILL.resultn      | <  | 0.75        |               | Missing | -0.001069198 | 1248         |      |
| AST.resultn    | >= | 43.5        | TBILL.resultn      | >= | 0.75        | ALB.resultn   | =       | Missing      | 0.000343045  | 1248 |
| AST.resultn    | >= | 43.5        | TBILL.resultn      | >= | 0.75        | ALB.resultn   | <       | 3.615        | 0.001624952  | 1248 |
| AST.resultn    | >= | 43.5        | TBILL.resultn      | >= | 0.75        | ALB.resultn   | >=      | 3.615        | 0            | 1248 |
| TBILL.resultn  | =  | Missing     |                    |    |             |               | Missing | -0.002059007 | 1249         |      |
| TBILL.resultn  | <  | 0.85        |                    |    |             |               | Missing | -0.001888257 | 1249         |      |
| TBILL.resultn  | >= | 0.85        | Hemoglobin.resultn | =  | Missing     | ALB.resultn   | =       | Missing      | 0.000442709  | 1249 |
| TBILL.resultn  | >= | 0.85        | Hemoglobin.resultn | =  | Missing     | ALB.resultn   | <       | 3.95         | 0.001062501  | 1249 |
| TBILL.resultn  | >= | 0.85        | Hemoglobin.resultn | =  | Missing     | ALB.resultn   | >=      | 3.95         | 0            | 1249 |

|               |    |             |                    |    |             |               |              |              |              |      |
|---------------|----|-------------|--------------------|----|-------------|---------------|--------------|--------------|--------------|------|
| TBILL.resultn | >= | 0.85        | Hemoglobin.resultn | <  | 13.75       | Missing       | -0.000244863 | 1249         |              |      |
| TBILL.resultn | >= | 0.85        | Hemoglobin.resultn | >= | 13.75       | Missing       | -0.002060594 | 1249         |              |      |
| ALB.resultn   | =  | Missing     |                    |    |             | Missing       | -0.002165263 | 1250         |              |      |
| ALB.resultn   | <  | 2.95        |                    |    |             | Missing       | -0.000867216 | 1250         |              |      |
| ALB.resultn   | >= | 2.95        | ALK.times.uln      | =  | Missing     | age.yrs       | =            | Missing      | -0.001787604 | 1250 |
| ALB.resultn   | >= | 2.95        | ALK.times.uln      | =  | Missing     | age.yrs       | <            | 53.35934292  | -0.002710239 | 1250 |
| ALB.resultn   | >= | 2.95        | ALK.times.uln      | =  | Missing     | age.yrs       | >=           | 53.35934292  | 0            | 1250 |
| ALB.resultn   | >= | 2.95        | ALK.times.uln      | <  | 7.850310559 |               | Missing      | -0.002624314 | 1250         |      |
| ALB.resultn   | >= | 2.95        | ALK.times.uln      | >= | 7.850310559 |               | Missing      | -0.002758214 | 1250         |      |
| ALK.times.uln | =  | Missing     | AST.resultn        | =  | Missing     |               | Missing      | -0.003527338 | 1251         |      |
| ALK.times.uln | =  | Missing     | AST.resultn        | <  | 70.5        | AST.resultn   | =            | Missing      | -0.003204118 | 1251 |
| ALK.times.uln | =  | Missing     | AST.resultn        | <  | 70.5        | AST.resultn   | <            | 43.5         | -0.004390829 | 1251 |
| ALK.times.uln | =  | Missing     | AST.resultn        | <  | 70.5        | AST.resultn   | >=           | 43.5         | 0            | 1251 |
| ALK.times.uln | =  | Missing     | AST.resultn        | >= | 70.5        |               | Missing      | -0.004025634 | 1251         |      |
| ALK.times.uln | <  | 5.462893197 |                    |    |             |               | Missing      | -0.00371581  | 1251         |      |
| ALK.times.uln | >= | 5.462893197 |                    |    |             |               | Missing      | -0.002278464 | 1251         |      |
| age.yrs       | =  | Missing     |                    |    |             |               | Missing      | -0.002525412 | 1252         |      |
| age.yrs       | <  | 49.10198494 |                    |    |             |               | Missing      | -0.002828982 | 1252         |      |
| age.yrs       | >= | 49.10198494 | AST.resultn        | =  | Missing     |               | Missing      | -0.002094631 | 1252         |      |
| age.yrs       | >= | 49.10198494 | AST.resultn        | <  | 51.5        |               | Missing      | -0.003248853 | 1252         |      |
| age.yrs       | >= | 49.10198494 | AST.resultn        | >= | 51.5        | psc.yrs.dur   | =            | Missing      | -0.001219015 | 1252 |
| age.yrs       | >= | 49.10198494 | AST.resultn        | >= | 51.5        | psc.yrs.dur   | <            | 0.476386037  | -0.002525102 | 1252 |
| age.yrs       | >= | 49.10198494 | AST.resultn        | >= | 51.5        | psc.yrs.dur   | >=           | 0.476386037  | 0            | 1252 |
| AST.resultn   | =  | Missing     |                    |    |             |               | Missing      | -0.006334541 | 1253         |      |
| AST.resultn   | <  | 47.5        |                    |    |             |               | Missing      | -0.00634736  | 1253         |      |
| AST.resultn   | >= | 47.5        | AST.resultn        | =  | Missing     |               | Missing      | -0.004382794 | 1253         |      |
| AST.resultn   | >= | 47.5        | AST.resultn        | <  | 72.5        | TBILL.resultn | =            | Missing      | -0.002248805 | 1253 |
| AST.resultn   | >= | 47.5        | AST.resultn        | <  | 72.5        | TBILL.resultn | <            | 0.65         | -0.006349567 | 1253 |
| AST.resultn   | >= | 47.5        | AST.resultn        | <  | 72.5        | TBILL.resultn | >=           | 0.65         | 0            | 1253 |
| AST.resultn   | >= | 47.5        | AST.resultn        | >= | 72.5        |               | Missing      | -0.005627621 | 1253         |      |
| ALB.resultn   | =  | Missing     |                    |    |             |               |              | -0.000430186 | 1254         |      |
| ALB.resultn   | <  | 3.645       | TBILL.resultn      | =  | Missing     |               |              | 0.000216925  | 1254         |      |
| ALB.resultn   | <  | 3.645       | TBILL.resultn      | <  | 1.31        |               |              | -0.000380275 | 1254         |      |
| ALB.resultn   | <  | 3.645       | TBILL.resultn      | >= | 1.31        |               |              | 0.001348462  | 1254         |      |
| ALB.resultn   | >= | 3.645       | Hemoglobin.resultn | =  | Missing     |               |              | 0            | 1254         |      |
| ALB.resultn   | >= | 3.645       | Hemoglobin.resultn | <  | 11.85       |               |              | 7.79E-05     | 1254         |      |
| ALB.resultn   | >= | 3.645       | Hemoglobin.resultn | >= | 11.85       |               |              | -0.001152141 | 1254         |      |
| TBILL.resultn | =  | Missing     |                    |    |             |               |              | -0.000549554 | 1255         |      |
| TBILL.resultn | <  | 1.95        | psc.yrs.dur        | =  | Missing     |               |              | -0.001665462 | 1255         |      |
| TBILL.resultn | <  | 1.95        | psc.yrs.dur        | <  | 6.410677618 |               |              | -0.001934085 | 1255         |      |
| TBILL.resultn | <  | 1.95        | psc.yrs.dur        | >= | 6.410677618 |               |              | 0            | 1255         |      |
| TBILL.resultn | >= | 1.95        | PLT.resultn        | =  | Missing     |               |              | 8.40E-05     | 1255         |      |
| TBILL.resultn | >= | 1.95        | PLT.resultn        | <  | 227         |               |              | 0.001454088  | 1255         |      |
| TBILL.resultn | >= | 1.95        | PLT.resultn        | >= | 227         |               |              | -0.000829332 | 1255         |      |
| age.yrs       | =  | Missing     |                    |    |             |               | Missing      | 0.000771452  | 1256         |      |
| age.yrs       | <  | 69.84257358 | Hemoglobin.resultn | =  | Missing     | ALB.resultn   | =            | Missing      | 0            | 1256 |
| age.yrs       | <  | 69.84257358 | Hemoglobin.resultn | =  | Missing     | ALB.resultn   | <            | 3.95         | 0.003073878  | 1256 |
| age.yrs       | <  | 69.84257358 | Hemoglobin.resultn | =  | Missing     | ALB.resultn   | >=           | 3.95         | 0.000911237  | 1256 |
| age.yrs       | <  | 69.84257358 | Hemoglobin.resultn | <  | 13.25       |               | Missing      | 0.001005737  | 1256         |      |
| age.yrs       | <  | 69.84257358 | Hemoglobin.resultn | >= | 13.25       |               | Missing      | 0.000126573  | 1256         |      |
| age.yrs       | >= | 69.84257358 |                    |    |             |               | Missing      | 0.003790186  | 1256         |      |
| psc.yrs.dur   | =  | Missing     |                    |    |             |               | Missing      | -0.003369052 | 1257         |      |
| psc.yrs.dur   | <  | 1.385352498 |                    |    |             |               | Missing      | -0.00364116  | 1257         |      |
| psc.yrs.dur   | >= | 1.385352498 | AST.resultn        | =  | Missing     |               | Missing      | -0.002873211 | 1257         |      |
| psc.yrs.dur   | >= | 1.385352498 | AST.resultn        | <  | 57.5        |               | Missing      | -0.004066189 | 1257         |      |
| psc.yrs.dur   | >= | 1.385352498 | AST.resultn        | >= | 57.5        | age.yrs       | =            | Missing      | -0.001809904 | 1257 |
| psc.yrs.dur   | >= | 1.385352498 | AST.resultn        | >= | 57.5        | age.yrs       | <            | 56.57084189  | -0.002378731 | 1257 |
| psc.yrs.dur   | >= | 1.385352498 | AST.resultn        | >= | 57.5        | age.yrs       | >=           | 56.57084189  | 0            | 1257 |
| ALB.resultn   | =  | Missing     |                    |    |             |               | Missing      | -0.00172332  | 1258         |      |
| ALB.resultn   | <  | 2.915       |                    |    |             |               | Missing      | 0.000515126  | 1258         |      |
| ALB.resultn   | >= | 2.915       | ALB.resultn        | =  | Missing     |               | Missing      | -0.001442445 | 1258         |      |
| ALB.resultn   | >= | 2.915       | ALB.resultn        | <  | 3.225       |               | Missing      | -0.001670257 | 1258         |      |

|                |    |             |                    |    |             |                    |    |             |              |      |
|----------------|----|-------------|--------------------|----|-------------|--------------------|----|-------------|--------------|------|
| ALB.resultn    | >= | 2.915       | ALB.resultn        | >= | 3.225       | TBILL.resultn      | =  | Missing     | -0.001428708 | 1258 |
| ALB.resultn    | >= | 2.915       | ALB.resultn        | >= | 3.225       | TBILL.resultn      | <  | 1.55        | -0.001645938 | 1258 |
| ALB.resultn    | >= | 2.915       | ALB.resultn        | >= | 3.225       | TBILL.resultn      | >= | 1.55        | 0            | 1258 |
| psc.yrs.dur    | =  | Missing     |                    |    |             |                    |    | Missing     | -0.003826255 | 1259 |
| psc.yrs.dur    | <  | 0.802190281 |                    |    |             |                    |    | Missing     | -0.004260081 | 1259 |
| psc.yrs.dur    | >= | 0.802190281 | AST.resultn        | =  | Missing     |                    |    | Missing     | -0.003276224 | 1259 |
| psc.yrs.dur    | >= | 0.802190281 | AST.resultn        | <  | 57.5        |                    |    | Missing     | -0.004122383 | 1259 |
| psc.yrs.dur    | >= | 0.802190281 | AST.resultn        | >= | 57.5        | age.yrs            | =  | Missing     | -0.002328527 | 1259 |
| psc.yrs.dur    | >= | 0.802190281 | AST.resultn        | >= | 57.5        | age.yrs            | <  | 51.58521561 | -0.003424304 | 1259 |
| psc.yrs.dur    | >= | 0.802190281 | AST.resultn        | >= | 57.5        | age.yrs            | >= | 51.58521561 | 0            | 1259 |
| PLT.resultn    | =  | Missing     |                    |    |             |                    |    |             | -0.001003498 | 1260 |
| PLT.resultn    | <  | 206.5       | TBILL.resultn      | =  | Missing     |                    |    |             | 0.000281063  | 1260 |
| PLT.resultn    | <  | 206.5       | TBILL.resultn      | <  | 1.65        |                    |    |             | -0.000382112 | 1260 |
| PLT.resultn    | <  | 206.5       | TBILL.resultn      | >= | 1.65        |                    |    |             | 0.002336908  | 1260 |
| PLT.resultn    | >= | 206.5       | psc.yrs.dur        | =  | Missing     |                    |    |             | -0.001359342 | 1260 |
| PLT.resultn    | >= | 206.5       | psc.yrs.dur        | <  | 6.410677618 |                    |    |             | -0.001562361 | 1260 |
| PLT.resultn    | >= | 206.5       | psc.yrs.dur        | >= | 6.410677618 |                    |    |             | 0            | 1260 |
| Sodium.resultn | =  | Missing     |                    |    |             |                    |    | Missing     | -0.001371894 | 1261 |
| Sodium.resultn | <  | 136.5       |                    |    |             |                    |    | Missing     | 0.001128281  | 1261 |
| Sodium.resultn | >= | 136.5       | PLT.resultn        | =  | Missing     |                    |    | Missing     | -0.000628629 | 1261 |
| Sodium.resultn | >= | 136.5       | PLT.resultn        | <  | 239.5       | ALK.times.uln      | =  | Missing     | 0            | 1261 |
| Sodium.resultn | >= | 136.5       | PLT.resultn        | <  | 239.5       | ALK.times.uln      | <  | 2.588866655 | -0.001029223 | 1261 |
| Sodium.resultn | >= | 136.5       | PLT.resultn        | <  | 239.5       | ALK.times.uln      | >= | 2.588866655 | 0.004031473  | 1261 |
| Sodium.resultn | >= | 136.5       | PLT.resultn        | >= | 239.5       |                    |    | Missing     | -0.001119192 | 1261 |
| AST.resultn    | =  | Missing     |                    |    |             |                    |    | Missing     | -0.002627208 | 1262 |
| AST.resultn    | <  | 43          |                    |    |             |                    |    | Missing     | -0.002615831 | 1262 |
| AST.resultn    | >= | 43          | TBILL.resultn      | =  | Missing     |                    |    | Missing     | -0.001294964 | 1262 |
| AST.resultn    | >= | 43          | TBILL.resultn      | <  | 0.95        |                    |    | Missing     | -0.002002124 | 1262 |
| AST.resultn    | >= | 43          | TBILL.resultn      | >= | 0.95        | Hemoglobin.resultn | =  | Missing     | 0            | 1262 |
| AST.resultn    | >= | 43          | TBILL.resultn      | >= | 0.95        | Hemoglobin.resultn | <  | 12.65       | -0.001788114 | 1262 |
| AST.resultn    | >= | 43          | TBILL.resultn      | >= | 0.95        | Hemoglobin.resultn | >= | 12.65       | -0.000474066 | 1262 |
| PLT.resultn    | =  | Missing     |                    |    |             |                    |    | Missing     | -0.003224271 | 1263 |
| PLT.resultn    | <  | 249.5       | TBILL.resultn      | =  | Missing     |                    |    | Missing     | -0.002217645 | 1263 |
| PLT.resultn    | <  | 249.5       | TBILL.resultn      | <  | 1.65        | PLT.resultn        | =  | Missing     | -0.002341252 | 1263 |
| PLT.resultn    | <  | 249.5       | TBILL.resultn      | <  | 1.65        | PLT.resultn        | <  | 232.5       | -0.00348979  | 1263 |
| PLT.resultn    | <  | 249.5       | TBILL.resultn      | <  | 1.65        | PLT.resultn        | >= | 232.5       | 0            | 1263 |
| PLT.resultn    | <  | 249.5       | TBILL.resultn      | >= | 1.65        |                    |    | Missing     | -0.001729396 | 1263 |
| PLT.resultn    | >= | 249.5       |                    |    |             |                    |    | Missing     | -0.003353392 | 1263 |
| PLT.resultn    | =  | Missing     |                    |    |             |                    |    | Missing     | 0.000489473  | 1264 |
| PLT.resultn    | <  | 185.5       |                    |    |             |                    |    | Missing     | 0.002243767  | 1264 |
| PLT.resultn    | >= | 185.5       | ALB.resultn        | =  | Missing     |                    |    | Missing     | 0.0016579    | 1264 |
| PLT.resultn    | >= | 185.5       | ALB.resultn        | <  | 3.45        |                    |    | Missing     | 7.73E-06     | 1264 |
| PLT.resultn    | >= | 185.5       | ALB.resultn        | >= | 3.45        | ALK.times.uln      | =  | Missing     | 0            | 1264 |
| PLT.resultn    | >= | 185.5       | ALB.resultn        | >= | 3.45        | ALK.times.uln      | <  | 2.815208295 | -0.00052452  | 1264 |
| PLT.resultn    | >= | 185.5       | ALB.resultn        | >= | 3.45        | ALK.times.uln      | >= | 2.815208295 | 0.002301853  | 1264 |
| ALK.times.uln  | =  | Missing     | ALB.resultn        | =  | Missing     |                    |    |             | -0.003636968 | 1265 |
| ALK.times.uln  | =  | Missing     | ALB.resultn        | <  | 3.95        |                    |    |             | -0.00060658  | 1265 |
| ALK.times.uln  | =  | Missing     | ALB.resultn        | >= | 3.95        |                    |    |             | -0.003608316 | 1265 |
| ALK.times.uln  | <  | 6.02        | psc.yrs.dur        | =  | Missing     |                    |    |             | -0.002990708 | 1265 |
| ALK.times.uln  | <  | 6.02        | psc.yrs.dur        | <  | 9.778234086 |                    |    |             | -0.003171963 | 1265 |
| ALK.times.uln  | <  | 6.02        | psc.yrs.dur        | >= | 9.778234086 |                    |    |             | 0            | 1265 |
| ALK.times.uln  | >= | 6.02        |                    |    |             |                    |    |             | -0.001868394 | 1265 |
| TBILL.resultn  | =  | Missing     |                    |    |             |                    |    | Missing     | 0.000705023  | 1266 |
| TBILL.resultn  | <  | 0.75        |                    |    |             |                    |    | Missing     | 0.00018737   | 1266 |
| TBILL.resultn  | >= | 0.75        | Hemoglobin.resultn | =  | Missing     |                    |    | Missing     | 0.002831681  | 1266 |
| TBILL.resultn  | >= | 0.75        | Hemoglobin.resultn | <  | 11.85       |                    |    | Missing     | 0.001515967  | 1266 |
| TBILL.resultn  | >= | 0.75        | Hemoglobin.resultn | >= | 11.85       | Sodium.resultn     | =  | Missing     | 0            | 1266 |
| TBILL.resultn  | >= | 0.75        | Hemoglobin.resultn | >= | 11.85       | Sodium.resultn     | <  | 137.5       | 0.003145582  | 1266 |
| TBILL.resultn  | >= | 0.75        | Hemoglobin.resultn | >= | 11.85       | Sodium.resultn     | >= | 137.5       | 0.000413585  | 1266 |
| ALK.times.uln  | =  | Missing     | TBILL.resultn      | =  | Missing     |                    |    |             | 0            | 1267 |
| ALK.times.uln  | =  | Missing     | TBILL.resultn      | <  | 1.31        |                    |    |             | 0.000531409  | 1267 |
| ALK.times.uln  | =  | Missing     | TBILL.resultn      | >= | 1.31        |                    |    |             | 0.004042528  | 1267 |



|                |    |             |                    |    |             |               |         |              |              |      |
|----------------|----|-------------|--------------------|----|-------------|---------------|---------|--------------|--------------|------|
| ALK.times.uln  | <  | 5.462893197 | TBILL.resultn      | =  | Missing     |               |         | 0.000617177  | 1267         |      |
| ALK.times.uln  | <  | 5.462893197 | TBILL.resultn      | <  | 2.5         |               |         | 0.000513588  | 1267         |      |
| ALK.times.uln  | <  | 5.462893197 | TBILL.resultn      | >= | 2.5         |               |         | 0.002274604  | 1267         |      |
| ALK.times.uln  | >= | 5.462893197 |                    |    |             |               |         | 0.002464994  | 1267         |      |
| TBILL.resultn  | =  | Missing     |                    |    |             |               |         | 0.000999521  | 1268         |      |
| TBILL.resultn  | <  | 2.05        | ALK.times.uln      | =  | Missing     |               |         | 0            | 1268         |      |
| TBILL.resultn  | <  | 2.05        | ALK.times.uln      | <  | 2.822501299 |               |         | -0.000667818 | 1268         |      |
| TBILL.resultn  | <  | 2.05        | ALK.times.uln      | >= | 2.822501299 |               |         | 0.001126731  | 1268         |      |
| TBILL.resultn  | >= | 2.05        | psc.yrs.dur        | =  | Missing     |               |         | 0.000761034  | 1268         |      |
| TBILL.resultn  | >= | 2.05        | psc.yrs.dur        | <  | 0.438056126 |               |         | -0.000105786 | 1268         |      |
| TBILL.resultn  | >= | 2.05        | psc.yrs.dur        | >= | 0.438056126 |               |         | 0.001627854  | 1268         |      |
| Sodium.resultn | =  | Missing     |                    |    |             |               | Missing | -0.002302619 | 1269         |      |
| Sodium.resultn | <  | 136.5       |                    |    |             |               | Missing | -0.000944779 | 1269         |      |
| Sodium.resultn | >= | 136.5       | PLT.resultn        | =  | Missing     |               | Missing | -0.001846371 | 1269         |      |
| Sodium.resultn | >= | 136.5       | PLT.resultn        | <  | 267.5       | age.yrs       | =       | Missing      | -0.001274601 | 1269 |
| Sodium.resultn | >= | 136.5       | PLT.resultn        | <  | 267.5       | age.yrs       | <       | 51.58521561  | -0.002247323 | 1269 |
| Sodium.resultn | >= | 136.5       | PLT.resultn        | <  | 267.5       | age.yrs       | >=      | 51.58521561  | 0            | 1269 |
| Sodium.resultn | >= | 136.5       | PLT.resultn        | >= | 267.5       |               |         | Missing      | -0.002409732 | 1269 |
| ALB.resultn    | =  | Missing     |                    |    |             |               | Missing | -0.001037703 | 1270         |      |
| ALB.resultn    | <  | 2.915       |                    |    |             |               | Missing | 0.000621011  | 1270         |      |
| ALB.resultn    | >= | 2.915       | TBILL.resultn      | =  | Missing     |               | Missing | -0.001641811 | 1270         |      |
| ALB.resultn    | >= | 2.915       | TBILL.resultn      | <  | 1.25        |               | Missing | -0.001836918 | 1270         |      |
| ALB.resultn    | >= | 2.915       | TBILL.resultn      | >= | 1.25        | age.yrs       | =       | Missing      | -0.000995281 | 1270 |
| ALB.resultn    | >= | 2.915       | TBILL.resultn      | >= | 1.25        | age.yrs       | <       | 54.30527036  | -0.001268983 | 1270 |
| ALB.resultn    | >= | 2.915       | TBILL.resultn      | >= | 1.25        | age.yrs       | >=      | 54.30527036  | 0            | 1270 |
| ALB.resultn    | =  | Missing     |                    |    |             |               | Missing | -0.002066151 | 1271         |      |
| ALB.resultn    | <  | 2.95        |                    |    |             |               | Missing | 0.00027747   | 1271         |      |
| ALB.resultn    | >= | 2.95        | TBILL.resultn      | =  | Missing     |               | Missing | -0.001250784 | 1271         |      |
| ALB.resultn    | >= | 2.95        | TBILL.resultn      | <  | 1.75        | age.yrs       | =       | Missing      | -0.001200402 | 1271 |
| ALB.resultn    | >= | 2.95        | TBILL.resultn      | <  | 1.75        | age.yrs       | <       | 53.32648871  | -0.001680563 | 1271 |
| ALB.resultn    | >= | 2.95        | TBILL.resultn      | <  | 1.75        | age.yrs       | >=      | 53.32648871  | 0            | 1271 |
| ALB.resultn    | >= | 2.95        | TBILL.resultn      | >= | 1.75        |               |         | Missing      | -0.001699637 | 1271 |
| age.yrs        | =  | Missing     |                    |    |             |               | Missing | -4.10E-06    | 1272         |      |
| age.yrs        | <  | 69.76043806 | psc.yrs.dur        | =  | Missing     |               | Missing | -0.000172785 | 1272         |      |
| age.yrs        | <  | 69.76043806 | psc.yrs.dur        | <  | 7.404517454 |               | Missing | -0.000334102 | 1272         |      |
| age.yrs        | <  | 69.76043806 | psc.yrs.dur        | >= | 7.404517454 | psc.yrs.dur   | =       | Missing      | 0.000809347  | 1272 |
| age.yrs        | <  | 69.76043806 | psc.yrs.dur        | >= | 7.404517454 | psc.yrs.dur   | <       | 9.45927447   | 0.002501619  | 1272 |
| age.yrs        | <  | 69.76043806 | psc.yrs.dur        | >= | 7.404517454 | psc.yrs.dur   | >=      | 9.45927447   | 0            | 1272 |
| age.yrs        | >= | 69.76043806 |                    |    |             |               | Missing | 0.003123139  | 1272         |      |
| ALB.resultn    | =  | Missing     |                    |    |             |               | Missing | -0.003113644 | 1273         |      |
| ALB.resultn    | <  | 2.95        |                    |    |             |               | Missing | -0.000983864 | 1273         |      |
| ALB.resultn    | >= | 2.95        | psc.yrs.dur        | =  | Missing     |               | Missing | -0.002347754 | 1273         |      |
| ALB.resultn    | >= | 2.95        | psc.yrs.dur        | <  | 6.410677618 |               | Missing | -0.002519224 | 1273         |      |
| ALB.resultn    | >= | 2.95        | psc.yrs.dur        | >= | 6.410677618 | AST.resultn   | =       | Missing      | -0.001302341 | 1273 |
| ALB.resultn    | >= | 2.95        | psc.yrs.dur        | >= | 6.410677618 | AST.resultn   | <       | 47.5         | -0.003105583 | 1273 |
| ALB.resultn    | >= | 2.95        | psc.yrs.dur        | >= | 6.410677618 | AST.resultn   | >=      | 47.5         | 0            | 1273 |
| ALK.times.uln  | =  | Missing     | ALB.resultn        | =  | Missing     |               |         | -0.002162872 | 1274         |      |
| ALK.times.uln  | =  | Missing     | ALB.resultn        | <  | 3.75        |               |         | -0.00010061  | 1274         |      |
| ALK.times.uln  | =  | Missing     | ALB.resultn        | >= | 3.75        |               |         | -0.001759085 | 1274         |      |
| ALK.times.uln  | <  | 5.462893197 | TBILL.resultn      | =  | Missing     |               |         | -0.001613951 | 1274         |      |
| ALK.times.uln  | <  | 5.462893197 | TBILL.resultn      | <  | 2.45        |               |         | -0.001710594 | 1274         |      |
| ALK.times.uln  | <  | 5.462893197 | TBILL.resultn      | >= | 2.45        |               |         | 0            | 1274         |      |
| ALK.times.uln  | >= | 5.462893197 |                    |    |             |               |         | 3.75E-05     | 1274         |      |
| TBILL.resultn  | =  | Missing     |                    |    |             |               | Missing | -0.000761793 | 1275         |      |
| TBILL.resultn  | <  | 0.95        |                    |    |             |               | Missing | -0.001900598 | 1275         |      |
| TBILL.resultn  | >= | 0.95        | Hemoglobin.resultn | =  | Missing     |               | Missing | 0.000583248  | 1275         |      |
| TBILL.resultn  | >= | 0.95        | Hemoglobin.resultn | <  | 14.95       | ALK.times.uln | =       | Missing      | -0.001036108 | 1275 |
| TBILL.resultn  | >= | 0.95        | Hemoglobin.resultn | <  | 14.95       | ALK.times.uln | <       | 2.781735492  | -0.00202512  | 1275 |
| TBILL.resultn  | >= | 0.95        | Hemoglobin.resultn | <  | 14.95       | ALK.times.uln | >=      | 2.781735492  | 0            | 1275 |
| TBILL.resultn  | >= | 0.95        | Hemoglobin.resultn | >= | 14.95       |               | Missing | -0.002027056 | 1275         |      |
| psc.yrs.dur    | =  | Missing     |                    |    |             |               |         | 0.0010702    | 1276         |      |
| psc.yrs.dur    | <  | 6.410677618 | AST.resultn        | =  | Missing     |               |         | 0            | 1276         |      |

|                    |    |             |                |    |             |                    |    |              |              |      |
|--------------------|----|-------------|----------------|----|-------------|--------------------|----|--------------|--------------|------|
| psc.yrs.dur        | <  | 6.410677618 | AST.resultn    | <  | 72.5        |                    |    | 0.001338791  | 1276         |      |
| psc.yrs.dur        | <  | 6.410677618 | AST.resultn    | >= | 72.5        |                    |    | 0.000349815  | 1276         |      |
| psc.yrs.dur        | >= | 6.410677618 | AST.resultn    | =  | Missing     |                    |    | 0.001875486  | 1276         |      |
| psc.yrs.dur        | >= | 6.410677618 | AST.resultn    | <  | 75          |                    |    | 0.001162629  | 1276         |      |
| psc.yrs.dur        | >= | 6.410677618 | AST.resultn    | >= | 75          |                    |    | 0.003236393  | 1276         |      |
| ALB.resultn        | =  | Missing     |                |    |             | Missing            |    | -0.002176019 | 1277         |      |
| ALB.resultn        | <  | 2.915       |                |    |             | Missing            |    | -0.00109571  | 1277         |      |
| ALB.resultn        | >= | 2.915       | TBILL.resultn  | =  | Missing     | Missing            |    | -0.00297922  | 1277         |      |
| ALB.resultn        | >= | 2.915       | TBILL.resultn  | <  | 0.85        | Missing            |    | -0.003507336 | 1277         |      |
| ALB.resultn        | >= | 2.915       | TBILL.resultn  | >= | 0.85        | Hemoglobin.resultn | =  | Missing      | 0            | 1277 |
| ALB.resultn        | >= | 2.915       | TBILL.resultn  | >= | 0.85        | Hemoglobin.resultn | <  | 15.4         | -0.002723724 | 1277 |
| ALB.resultn        | >= | 2.915       | TBILL.resultn  | >= | 0.85        | Hemoglobin.resultn | >= | 15.4         | -0.001836846 | 1277 |
| Sodium.resultn     | =  | Missing     |                |    |             | Missing            |    | -0.00321285  | 1278         |      |
| Sodium.resultn     | <  | 138.5       | psc.yrs.dur    | =  | Missing     | Missing            |    | -0.002636877 | 1278         |      |
| Sodium.resultn     | <  | 138.5       | psc.yrs.dur    | <  | 1.232032854 | Missing            |    | -0.003343211 | 1278         |      |
| Sodium.resultn     | <  | 138.5       | psc.yrs.dur    | >= | 1.232032854 | age.yrs            | =  | Missing      | -0.001416846 | 1278 |
| Sodium.resultn     | <  | 138.5       | psc.yrs.dur    | >= | 1.232032854 | age.yrs            | <  | 48.76933607  | -0.002597552 | 1278 |
| Sodium.resultn     | <  | 138.5       | psc.yrs.dur    | >= | 1.232032854 | age.yrs            | >= | 48.76933607  | 0            | 1278 |
| Sodium.resultn     | >= | 138.5       |                |    |             | Missing            |    | -0.003568097 | 1278         |      |
| ALK.times.uln      | =  | Missing     | TBILL.resultn  | =  | Missing     | Missing            |    | -0.000748655 | 1279         |      |
| ALK.times.uln      | =  | Missing     | TBILL.resultn  | <  | 0.95        | Missing            |    | -0.000743293 | 1279         |      |
| ALK.times.uln      | =  | Missing     | TBILL.resultn  | >= | 0.95        | AST.resultn        | =  | Missing      | 0.00176506   | 1279 |
| ALK.times.uln      | =  | Missing     | TBILL.resultn  | >= | 0.95        | AST.resultn        | <  | 75           | 0.00441265   | 1279 |
| ALK.times.uln      | =  | Missing     | TBILL.resultn  | >= | 0.95        | AST.resultn        | >= | 75           | 0            | 1279 |
| ALK.times.uln      | <  | 5.963877551 |                |    |             | Missing            |    | -0.000180221 | 1279         |      |
| ALK.times.uln      | >= | 5.963877551 |                |    |             | Missing            |    | 0.001271881  | 1279         |      |
| ALB.resultn        | =  | Missing     |                |    |             | Missing            |    | -0.00182248  | 1280         |      |
| ALB.resultn        | <  | 2.915       |                |    |             | Missing            |    | -0.000223601 | 1280         |      |
| ALB.resultn        | >= | 2.915       | TBILL.resultn  | =  | Missing     | Missing            |    | -0.001993098 | 1280         |      |
| ALB.resultn        | >= | 2.915       | TBILL.resultn  | <  | 0.95        | Missing            |    | -0.002433054 | 1280         |      |
| ALB.resultn        | >= | 2.915       | TBILL.resultn  | >= | 0.95        | Hemoglobin.resultn | =  | Missing      | 0            | 1280 |
| ALB.resultn        | >= | 2.915       | TBILL.resultn  | >= | 0.95        | Hemoglobin.resultn | <  | 12.5         | -0.002031524 | 1280 |
| ALB.resultn        | >= | 2.915       | TBILL.resultn  | >= | 0.95        | Hemoglobin.resultn | >= | 12.5         | -0.001420399 | 1280 |
| ALK.times.uln      | =  | Missing     | TBILL.resultn  | =  | Missing     |                    |    | -0.002373056 | 1281         |      |
| ALK.times.uln      | =  | Missing     | TBILL.resultn  | <  | 1.15        |                    |    | -0.002348676 | 1281         |      |
| ALK.times.uln      | =  | Missing     | TBILL.resultn  | >= | 1.15        |                    |    | -0.000772799 | 1281         |      |
| ALK.times.uln      | <  | 6.02        | ALB.resultn    | =  | Missing     |                    |    | 0            | 1281         |      |
| ALK.times.uln      | <  | 6.02        | ALB.resultn    | <  | 4.25        |                    |    | -0.002365484 | 1281         |      |
| ALK.times.uln      | <  | 6.02        | ALB.resultn    | >= | 4.25        |                    |    | -0.001009509 | 1281         |      |
| ALK.times.uln      | >= | 6.02        |                |    |             |                    |    | -0.000417765 | 1281         |      |
| ALK.times.uln      | =  | Missing     | Sodium.resultn | =  | Missing     |                    |    | 0            | 1282         |      |
| ALK.times.uln      | =  | Missing     | Sodium.resultn | <  | 140.5       |                    |    | 0.001668226  | 1282         |      |
| ALK.times.uln      | =  | Missing     | Sodium.resultn | >= | 140.5       |                    |    | 0.000320432  | 1282         |      |
| ALK.times.uln      | <  | 5.857962963 | TBILL.resultn  | =  | Missing     |                    |    | 0.000573576  | 1282         |      |
| ALK.times.uln      | <  | 5.857962963 | TBILL.resultn  | <  | 2.85        |                    |    | 0.000433168  | 1282         |      |
| ALK.times.uln      | <  | 5.857962963 | TBILL.resultn  | >= | 2.85        |                    |    | 0.002806058  | 1282         |      |
| ALK.times.uln      | >= | 5.857962963 |                |    |             |                    |    | 0.001926964  | 1282         |      |
| psc.yrs.dur        | =  | Missing     |                |    |             |                    |    | 0.000779237  | 1283         |      |
| psc.yrs.dur        | <  | 7.314168378 | PLT.resultn    | =  | Missing     |                    |    | 0            | 1283         |      |
| psc.yrs.dur        | <  | 7.314168378 | PLT.resultn    | <  | 248.5       |                    |    | 0.001458076  | 1283         |      |
| psc.yrs.dur        | <  | 7.314168378 | PLT.resultn    | >= | 248.5       |                    |    | 0.000128059  | 1283         |      |
| psc.yrs.dur        | >= | 7.314168378 | AST.resultn    | =  | Missing     |                    |    | 0.001955739  | 1283         |      |
| psc.yrs.dur        | >= | 7.314168378 | AST.resultn    | <  | 52.5        |                    |    | 0.001363265  | 1283         |      |
| psc.yrs.dur        | >= | 7.314168378 | AST.resultn    | >= | 52.5        |                    |    | 0.002903698  | 1283         |      |
| Hemoglobin.resultn | =  | Missing     | TBILL.resultn  | =  | Missing     |                    |    | -0.00056153  | 1284         |      |
| Hemoglobin.resultn | =  | Missing     | TBILL.resultn  | <  | 0.95        |                    |    | -0.001437854 | 1284         |      |
| Hemoglobin.resultn | =  | Missing     | TBILL.resultn  | >= | 0.95        |                    |    | 0.001144995  | 1284         |      |
| Hemoglobin.resultn | <  | 14.15       | psc.yrs.dur    | =  | Missing     |                    |    | -0.001009253 | 1284         |      |
| Hemoglobin.resultn | <  | 14.15       | psc.yrs.dur    | <  | 1.336071184 |                    |    | -0.001666068 | 1284         |      |
| Hemoglobin.resultn | <  | 14.15       | psc.yrs.dur    | >= | 1.336071184 |                    |    | 0            | 1284         |      |
| Hemoglobin.resultn | >= | 14.15       |                |    |             |                    |    | -0.001931708 | 1284         |      |
| Sodium.resultn     | =  | Missing     |                |    |             | Missing            |    | 0.000884208  | 1285         |      |

|                |    |             |                    |    |             |                |             |             |              |              |      |
|----------------|----|-------------|--------------------|----|-------------|----------------|-------------|-------------|--------------|--------------|------|
| Sodium.resultn | <  | 136.5       |                    |    |             | Missing        | 0.002950436 | 1285        |              |              |      |
| Sodium.resultn | >= | 136.5       | TBILL.resultn      | =  | Missing     | Missing        | 0.000688088 | 1285        |              |              |      |
| Sodium.resultn | >= | 136.5       | TBILL.resultn      | <  | 0.95        | ALB.resultn    | =           | Missing     | 0.000926725  | 1285         |      |
| Sodium.resultn | >= | 136.5       | TBILL.resultn      | <  | 0.95        | ALB.resultn    | <           | 4.35        | 0.001274247  | 1285         |      |
| Sodium.resultn | >= | 136.5       | TBILL.resultn      | <  | 0.95        | ALB.resultn    | >=          | 4.35        | 0            | 1285         |      |
| Sodium.resultn | >= | 136.5       | TBILL.resultn      | >= | 0.95        |                | Missing     |             | 0.000266965  | 1285         |      |
| psc.yrs.dur    | =  | Missing     |                    |    |             |                |             |             | -0.003623422 | 1286         |      |
| psc.yrs.dur    | <  | 6.410677618 | age.yrs            | =  | Missing     |                |             |             | -0.003868041 | 1286         |      |
| psc.yrs.dur    | <  | 6.410677618 | age.yrs            | <  | 69.42231348 |                |             |             | -0.00405136  | 1286         |      |
| psc.yrs.dur    | <  | 6.410677618 | age.yrs            | >= | 69.42231348 |                |             |             | 0            | 1286         |      |
| psc.yrs.dur    | >= | 6.410677618 | AST.resultn        | =  | Missing     |                |             |             | -0.001985219 | 1286         |      |
| psc.yrs.dur    | >= | 6.410677618 | AST.resultn        | <  | 43          |                |             |             | -0.004544286 | 1286         |      |
| psc.yrs.dur    | >= | 6.410677618 | AST.resultn        | >= | 43          |                |             |             | 0.000573849  | 1286         |      |
| ALB.resultn    | =  | Missing     |                    |    |             |                | Missing     |             | -0.004235126 | 1287         |      |
| ALB.resultn    | <  | 2.965       |                    |    |             |                | Missing     |             | -0.001720059 | 1287         |      |
| ALB.resultn    | >= | 2.965       | psc.yrs.dur        | =  | Missing     |                | Missing     |             | -0.00351486  | 1287         |      |
| ALB.resultn    | >= | 2.965       | psc.yrs.dur        | <  | 6.410677618 |                | Missing     |             | -0.00371256  | 1287         |      |
| ALB.resultn    | >= | 2.965       | psc.yrs.dur        | >= | 6.410677618 | AST.resultn    | =           | Missing     | -0.00202816  | 1287         |      |
| ALB.resultn    | >= | 2.965       | psc.yrs.dur        | >= | 6.410677618 | AST.resultn    | <           | 47          | -0.004225333 | 1287         |      |
| ALB.resultn    | >= | 2.965       | psc.yrs.dur        | >= | 6.410677618 | AST.resultn    | >=          | 47          | 0            | 1287         |      |
| psc.yrs.dur    | =  | Missing     |                    |    |             |                |             |             | 0.000585874  | 1288         |      |
| psc.yrs.dur    | <  | 6.324435318 | TBILL.resultn      | =  | Missing     |                |             |             | 0.000498559  | 1288         |      |
| psc.yrs.dur    | <  | 6.324435318 | TBILL.resultn      | <  | 3.05        |                |             |             | 0.000530214  | 1288         |      |
| psc.yrs.dur    | <  | 6.324435318 | TBILL.resultn      | >= | 3.05        |                |             |             | 0            | 1288         |      |
| psc.yrs.dur    | >= | 6.324435318 | AST.resultn        | =  | Missing     |                |             |             | 0.001002604  | 1288         |      |
| psc.yrs.dur    | >= | 6.324435318 | AST.resultn        | <  | 47          |                |             |             | -0.000272804 | 1288         |      |
| psc.yrs.dur    | >= | 6.324435318 | AST.resultn        | >= | 47          |                |             |             | 0.002341782  | 1288         |      |
| ALK.times.uln  | =  | Missing     | TBILL.resultn      | =  | Missing     |                |             |             | 0            | 1289         |      |
| ALK.times.uln  | =  | Missing     | TBILL.resultn      | <  | 0.95        |                |             |             | -3.47E-05    | 1289         |      |
| ALK.times.uln  | =  | Missing     | TBILL.resultn      | >= | 0.95        |                |             |             | 0.001888315  | 1289         |      |
| ALK.times.uln  | <  | 5.446215139 |                    |    |             |                |             |             | 0.000635435  | 1289         |      |
| ALK.times.uln  | >= | 5.446215139 | ALK.times.uln      | =  | Missing     |                |             |             | 0.001811642  | 1289         |      |
| ALK.times.uln  | >= | 5.446215139 | ALK.times.uln      | <  | 7.794978567 |                |             |             | 0.002602269  | 1289         |      |
| ALK.times.uln  | >= | 5.446215139 | ALK.times.uln      | >= | 7.794978567 |                |             |             | 0.000805389  | 1289         |      |
| TBILL.resultn  | =  | Missing     |                    |    |             |                |             |             | -0.001819468 | 1290         |      |
| TBILL.resultn  | <  | 1.65        | ALB.resultn        | =  | Missing     |                |             |             | 0            | 1290         |      |
| TBILL.resultn  | <  | 1.65        | ALB.resultn        | <  | 3.275       |                |             |             | -0.002778231 | 1290         |      |
| TBILL.resultn  | <  | 1.65        | ALB.resultn        | >= | 3.275       |                |             |             | -0.001821967 | 1290         |      |
| TBILL.resultn  | >= | 1.65        | Hemoglobin.resultn | =  | Missing     |                |             |             | -0.001999519 | 1290         |      |
| TBILL.resultn  | >= | 1.65        | Hemoglobin.resultn | <  | 13.3        |                |             |             | -0.001154809 | 1290         |      |
| TBILL.resultn  | >= | 1.65        | Hemoglobin.resultn | >= | 13.3        |                |             |             | -0.002779251 | 1290         |      |
| age.yrs        | =  | Missing     |                    |    |             |                | Missing     |             | -0.001192601 | 1291         |      |
| age.yrs        | <  | 70.54620123 | ALK.times.uln      | =  | Missing     | psc.yrs.dur    | =           | Missing     | -0.001137868 | 1291         |      |
| age.yrs        | <  | 70.54620123 | ALK.times.uln      | =  | Missing     | psc.yrs.dur    | <           | 4.895277207 | -0.00162922  | 1291         |      |
| age.yrs        | <  | 70.54620123 | ALK.times.uln      | =  | Missing     | psc.yrs.dur    | >=          | 4.895277207 | 0            | 1291         |      |
| age.yrs        | <  | 70.54620123 | ALK.times.uln      | <  | 5.462893197 |                |             |             | Missing      | -0.001514212 | 1291 |
| age.yrs        | <  | 70.54620123 | ALK.times.uln      | >= | 5.462893197 |                |             |             | Missing      | -0.000329857 | 1291 |
| age.yrs        | >= | 70.54620123 |                    |    |             |                |             |             | Missing      | 0.002507224  | 1291 |
| age.yrs        | =  | Missing     |                    |    |             |                |             |             | Missing      | -0.00033731  | 1292 |
| age.yrs        | <  | 69.84257358 | psc.yrs.dur        | =  | Missing     |                |             |             | Missing      | -0.000471783 | 1292 |
| age.yrs        | <  | 69.84257358 | psc.yrs.dur        | <  | 1.397672827 |                |             |             | Missing      | -0.00082347  | 1292 |
| age.yrs        | <  | 69.84257358 | psc.yrs.dur        | >= | 1.397672827 | Sodium.resultn | =           | Missing     | 0            | 1292         |      |
| age.yrs        | <  | 69.84257358 | psc.yrs.dur        | >= | 1.397672827 | Sodium.resultn | <           | 140.5       | 0.001017488  | 1292         |      |
| age.yrs        | <  | 69.84257358 | psc.yrs.dur        | >= | 1.397672827 | Sodium.resultn | >=          | 140.5       | -0.000878715 | 1292         |      |
| age.yrs        | >= | 69.84257358 |                    |    |             |                |             | Missing     | 0.00294384   | 1292         |      |
| ALK.times.uln  | =  | Missing     | TBILL.resultn      | =  | Missing     |                |             |             | 0            | 1293         |      |
| ALK.times.uln  | =  | Missing     | TBILL.resultn      | <  | 1.15        |                |             |             | 1.02E-05     | 1293         |      |
| ALK.times.uln  | =  | Missing     | TBILL.resultn      | >= | 1.15        |                |             |             | 0.001848721  | 1293         |      |
| ALK.times.uln  | <  | 5.462893197 |                    |    |             |                |             |             | 0.000455778  | 1293         |      |
| ALK.times.uln  | >= | 5.462893197 | ALK.times.uln      | =  | Missing     |                |             |             | 0.002109042  | 1293         |      |
| ALK.times.uln  | >= | 5.462893197 | ALK.times.uln      | <  | 7.794978567 |                |             |             | 0.002971426  | 1293         |      |
| ALK.times.uln  | >= | 5.462893197 | ALK.times.uln      | >= | 7.794978567 |                |             |             | 0.000729227  | 1293         |      |

|                    |    |             |               |    |             |              |      |             |              |      |
|--------------------|----|-------------|---------------|----|-------------|--------------|------|-------------|--------------|------|
| age.yrs            | =  | Missing     |               |    | Missing     | -0.001110456 | 1294 |             |              |      |
| age.yrs            | <  | 69.84257358 | ALK.times.uln | =  | Missing     | age.yrs      | =    | Missing     | -0.001256133 | 1294 |
| age.yrs            | <  | 69.84257358 | ALK.times.uln | =  | Missing     | age.yrs      | <    | 53.29226557 | -0.001840381 | 1294 |
| age.yrs            | <  | 69.84257358 | ALK.times.uln | =  | Missing     | age.yrs      | >=   | 53.29226557 | 0            | 1294 |
| age.yrs            | <  | 69.84257358 | ALK.times.uln | <  | 5.462893197 |              |      | Missing     | -0.001708809 | 1294 |
| age.yrs            | <  | 69.84257358 | ALK.times.uln | >= | 5.462893197 |              |      | Missing     | 0.000498977  | 1294 |
| age.yrs            | >= | 69.84257358 |               |    |             |              |      | Missing     | 0.006103076  | 1294 |
| ALB.resultn        | =  | Missing     |               |    |             |              |      | Missing     | -0.001028335 | 1295 |
| ALB.resultn        | <  | 3.615       | PLT.resultn   | =  | Missing     |              |      | Missing     | 0.000401604  | 1295 |
| ALB.resultn        | <  | 3.615       | PLT.resultn   | <  | 218         |              |      | Missing     | 0.003638522  | 1295 |
| ALB.resultn        | <  | 3.615       | PLT.resultn   | >= | 218         | PLT.resultn  | =    | Missing     | -0.00049754  | 1295 |
| ALB.resultn        | <  | 3.615       | PLT.resultn   | >= | 218         | PLT.resultn  | <    | 260.5       | -0.001194095 | 1295 |
| ALB.resultn        | <  | 3.615       | PLT.resultn   | >= | 218         | PLT.resultn  | >=   | 260.5       | 0            | 1295 |
| ALB.resultn        | >= | 3.615       |               |    |             |              |      | Missing     | -0.000779526 | 1295 |
| TBILL.resultn      | =  | Missing     |               |    |             |              |      |             | -0.001049405 | 1296 |
| TBILL.resultn      | <  | 2           | age.yrs       | =  | Missing     |              |      |             | -0.002869167 | 1296 |
| TBILL.resultn      | <  | 2           | age.yrs       | <  | 70.54620123 |              |      |             | -0.003007107 | 1296 |
| TBILL.resultn      | <  | 2           | age.yrs       | >= | 70.54620123 |              |      |             | 0            | 1296 |
| TBILL.resultn      | >= | 2           | age.yrs       | =  | Missing     |              |      |             | -0.002266391 | 1296 |
| TBILL.resultn      | >= | 2           | age.yrs       | <  | 48.91170431 |              |      |             | -0.002619458 | 1296 |
| TBILL.resultn      | >= | 2           | age.yrs       | >= | 48.91170431 |              |      |             | -0.001772097 | 1296 |
| age.yrs            | =  | Missing     |               |    |             |              |      | Missing     | -0.002649011 | 1297 |
| age.yrs            | <  | 49.15811088 |               |    |             |              |      | Missing     | -0.002920928 | 1297 |
| age.yrs            | >= | 49.15811088 | psc.yrs.dur   | =  | Missing     |              |      | Missing     | -0.002178273 | 1297 |
| age.yrs            | >= | 49.15811088 | psc.yrs.dur   | <  | 0.476386037 |              |      | Missing     | -0.002899799 | 1297 |
| age.yrs            | >= | 49.15811088 | psc.yrs.dur   | >= | 0.476386037 | AST.resultn  | =    | Missing     | -0.001501843 | 1297 |
| age.yrs            | >= | 49.15811088 | psc.yrs.dur   | >= | 0.476386037 | AST.resultn  | <    | 58.5        | -0.003289751 | 1297 |
| age.yrs            | >= | 49.15811088 | psc.yrs.dur   | >= | 0.476386037 | AST.resultn  | >=   | 58.5        | 0            | 1297 |
| TBILL.resultn      | =  | Missing     |               |    |             |              |      |             | -0.000408508 | 1298 |
| TBILL.resultn      | <  | 1.95        | ALB.resultn   | =  | Missing     |              |      |             | 0            | 1298 |
| TBILL.resultn      | <  | 1.95        | ALB.resultn   | <  | 3.185       |              |      |             | -0.002351427 | 1298 |
| TBILL.resultn      | <  | 1.95        | ALB.resultn   | >= | 3.185       |              |      |             | -0.001700375 | 1298 |
| TBILL.resultn      | >= | 1.95        | ALB.resultn   | =  | Missing     |              |      |             | -0.001028746 | 1298 |
| TBILL.resultn      | >= | 1.95        | ALB.resultn   | <  | 3.35        |              |      |             | -0.000516136 | 1298 |
| TBILL.resultn      | >= | 1.95        | ALB.resultn   | >= | 3.35        |              |      |             | -0.001298541 | 1298 |
| ALB.resultn        | =  | Missing     |               |    |             |              |      | Missing     | -0.004691012 | 1299 |
| ALB.resultn        | <  | 2.915       |               |    |             |              |      | Missing     | -0.002501257 | 1299 |
| ALB.resultn        | >= | 2.915       | psc.yrs.dur   | =  | Missing     |              |      | Missing     | -0.003916914 | 1299 |
| ALB.resultn        | >= | 2.915       | psc.yrs.dur   | <  | 6.324435318 |              |      | Missing     | -0.004106995 | 1299 |
| ALB.resultn        | >= | 2.915       | psc.yrs.dur   | >= | 6.324435318 | AST.resultn  | =    | Missing     | -0.002586346 | 1299 |
| ALB.resultn        | >= | 2.915       | psc.yrs.dur   | >= | 6.324435318 | AST.resultn  | <    | 66.5        | -0.004655423 | 1299 |
| ALB.resultn        | >= | 2.915       | psc.yrs.dur   | >= | 6.324435318 | AST.resultn  | >=   | 66.5        | 0            | 1299 |
| Hemoglobin.resultn | =  | Missing     | TBILL.resultn | =  | Missing     |              |      |             | 0.001018639  | 1300 |
| Hemoglobin.resultn | =  | Missing     | TBILL.resultn | <  | 1.15        |              |      |             | 0.000594294  | 1300 |
| Hemoglobin.resultn | =  | Missing     | TBILL.resultn | >= | 1.15        |              |      |             | 0.002786745  | 1300 |
| Hemoglobin.resultn | <  | 11.15       |               |    |             |              |      |             | 0.001900901  | 1300 |
| Hemoglobin.resultn | >= | 11.15       | TBILL.resultn | =  | Missing     |              |      |             | 0.000465445  | 1300 |
| Hemoglobin.resultn | >= | 11.15       | TBILL.resultn | <  | 1.95        |              |      |             | 0.000520929  | 1300 |
| Hemoglobin.resultn | >= | 11.15       | TBILL.resultn | >= | 1.95        |              |      |             | 0            | 1300 |
| TBILL.resultn      | =  | Missing     |               |    |             |              |      |             | 0.000390996  | 1301 |
| TBILL.resultn      | <  | 2.45        | age.yrs       | =  | Missing     |              |      |             | -0.001173451 | 1301 |
| TBILL.resultn      | <  | 2.45        | age.yrs       | <  | 56.0752909  |              |      |             | -0.001559832 | 1301 |
| TBILL.resultn      | <  | 2.45        | age.yrs       | >= | 56.0752909  |              |      |             | 0            | 1301 |
| TBILL.resultn      | >= | 2.45        | age.yrs       | =  | Missing     |              |      |             | -0.000236057 | 1301 |
| TBILL.resultn      | >= | 2.45        | age.yrs       | <  | 46.09034908 |              |      |             | -0.000756351 | 1301 |
| TBILL.resultn      | >= | 2.45        | age.yrs       | >= | 46.09034908 |              |      |             | 0.000236938  | 1301 |
| psc.yrs.dur        | =  | Missing     |               |    |             |              |      |             | 0.000412602  | 1302 |
| psc.yrs.dur        | <  | 6.410677618 | psc.yrs.dur   | =  | Missing     |              |      |             | 0.000218529  | 1302 |
| psc.yrs.dur        | <  | 6.410677618 | psc.yrs.dur   | <  | 0.042436687 |              |      |             | 0.001249538  | 1302 |
| psc.yrs.dur        | <  | 6.410677618 | psc.yrs.dur   | >= | 0.042436687 |              |      |             | 0            | 1302 |
| psc.yrs.dur        | >= | 6.410677618 | AST.resultn   | =  | Missing     |              |      |             | 0.001808672  | 1302 |
| psc.yrs.dur        | >= | 6.410677618 | AST.resultn   | <  | 69          |              |      |             | 0.000978393  | 1302 |

|                    |    |             |                    |    |             |                    |    |              |              |      |
|--------------------|----|-------------|--------------------|----|-------------|--------------------|----|--------------|--------------|------|
| psc.yrs.dur        | >= | 6.410677618 | AST.resultn        | >= | 69          |                    |    | 0.003386202  | 1302         |      |
| TBILL.resultn      | =  | Missing     |                    |    |             | Missing            |    | -0.000155481 | 1303         |      |
| TBILL.resultn      | <  | 2.45        | ALK.times.uln      | =  | Missing     | age.yrs            | =  | Missing      | -0.000981159 | 1303 |
| TBILL.resultn      | <  | 2.45        | ALK.times.uln      | =  | Missing     | age.yrs            | <  | 53.35934292  | -0.001398152 | 1303 |
| TBILL.resultn      | <  | 2.45        | ALK.times.uln      | =  | Missing     | age.yrs            | >= | 53.35934292  | 0            | 1303 |
| TBILL.resultn      | <  | 2.45        | ALK.times.uln      | <  | 5.462893197 |                    |    | Missing      | -0.000876439 | 1303 |
| TBILL.resultn      | <  | 2.45        | ALK.times.uln      | >= | 5.462893197 |                    |    | Missing      | 0.000427256  | 1303 |
| TBILL.resultn      | >= | 2.45        |                    |    |             |                    |    | Missing      | 0.000776977  | 1303 |
| TBILL.resultn      | =  | Missing     |                    |    |             |                    |    |              | 0.003256422  | 1304 |
| TBILL.resultn      | <  | 1.95        | TBILL.resultn      | =  | Missing     |                    |    |              | 0.000744923  | 1304 |
| TBILL.resultn      | <  | 1.95        | TBILL.resultn      | <  | 1.35        |                    |    |              | 0.00084294   | 1304 |
| TBILL.resultn      | <  | 1.95        | TBILL.resultn      | >= | 1.35        |                    |    |              | 0            | 1304 |
| TBILL.resultn      | >= | 1.95        | Hemoglobin.resultn | =  | Missing     |                    |    |              | 0.000998166  | 1304 |
| TBILL.resultn      | >= | 1.95        | Hemoglobin.resultn | <  | 12.95       |                    |    |              | 0.002094673  | 1304 |
| TBILL.resultn      | >= | 1.95        | Hemoglobin.resultn | >= | 12.95       |                    |    |              | 1.34E-06     | 1304 |
| ALB.resultn        | =  | Missing     |                    |    |             |                    |    | Missing      | -0.000610825 | 1305 |
| ALB.resultn        | <  | 2.915       |                    |    |             |                    |    | Missing      | 0.0007704    | 1305 |
| ALB.resultn        | >= | 2.915       | TBILL.resultn      | =  | Missing     |                    |    | Missing      | -0.001090878 | 1305 |
| ALB.resultn        | >= | 2.915       | TBILL.resultn      | <  | 2.6         | TBILL.resultn      | =  | Missing      | -0.001075683 | 1305 |
| ALB.resultn        | >= | 2.915       | TBILL.resultn      | <  | 2.6         | TBILL.resultn      | <  | 0.85         | -0.001756949 | 1305 |
| ALB.resultn        | >= | 2.915       | TBILL.resultn      | <  | 2.6         | TBILL.resultn      | >= | 0.85         | 0            | 1305 |
| ALB.resultn        | >= | 2.915       | TBILL.resultn      | >= | 2.6         |                    |    | Missing      | -0.001319977 | 1305 |
| age.yrs            | =  | Missing     |                    |    |             |                    |    | Missing      | -0.001637935 | 1306 |
| age.yrs            | <  | 69.76043806 | ALK.times.uln      | =  | Missing     |                    |    | Missing      | -0.001208506 | 1306 |
| age.yrs            | <  | 69.76043806 | ALK.times.uln      | <  | 7.850310559 | ALK.times.uln      | =  | Missing      | -0.001928258 | 1306 |
| age.yrs            | <  | 69.76043806 | ALK.times.uln      | <  | 7.850310559 | ALK.times.uln      | <  | 6.02         | -0.002045122 | 1306 |
| age.yrs            | <  | 69.76043806 | ALK.times.uln      | <  | 7.850310559 | ALK.times.uln      | >= | 6.02         | 0            | 1306 |
| age.yrs            | <  | 69.76043806 | ALK.times.uln      | >= | 7.850310559 |                    |    | Missing      | -0.002226721 | 1306 |
| age.yrs            | >= | 69.76043806 |                    |    |             |                    |    | Missing      | 0.000724629  | 1306 |
| ALB.resultn        | =  | Missing     |                    |    |             |                    |    | Missing      | -0.00325717  | 1307 |
| ALB.resultn        | <  | 3.03        |                    |    |             |                    |    | Missing      | -0.000860436 | 1307 |
| ALB.resultn        | >= | 3.03        | psc.yrs.dur        | =  | Missing     |                    |    | Missing      | -0.002513739 | 1307 |
| ALB.resultn        | >= | 3.03        | psc.yrs.dur        | <  | 1.961670089 |                    |    | Missing      | -0.00290479  | 1307 |
| ALB.resultn        | >= | 3.03        | psc.yrs.dur        | >= | 1.961670089 | age.yrs            | =  | Missing      | -0.001617328 | 1307 |
| ALB.resultn        | >= | 3.03        | psc.yrs.dur        | >= | 1.961670089 | age.yrs            | <  | 51.63175907  | -0.002564057 | 1307 |
| ALB.resultn        | >= | 3.03        | psc.yrs.dur        | >= | 1.961670089 | age.yrs            | >= | 51.63175907  | 0            | 1307 |
| Hemoglobin.resultn | =  | Missing     | ALB.resultn        | =  | Missing     |                    |    |              | -0.000432665 | 1308 |
| Hemoglobin.resultn | =  | Missing     | ALB.resultn        | <  | 3.75        |                    |    |              | 0.00315556   | 1308 |
| Hemoglobin.resultn | =  | Missing     | ALB.resultn        | >= | 3.75        |                    |    |              | 0.000813768  | 1308 |
| Hemoglobin.resultn | <  | 13.85       | PLT.resultn        | =  | Missing     |                    |    |              | 0.000415678  | 1308 |
| Hemoglobin.resultn | <  | 13.85       | PLT.resultn        | <  | 249.5       |                    |    |              | 0.001346796  | 1308 |
| Hemoglobin.resultn | <  | 13.85       | PLT.resultn        | >= | 249.5       |                    |    |              | 0            | 1308 |
| Hemoglobin.resultn | >= | 13.85       |                    |    |             |                    |    |              | -0.00031818  | 1308 |
| TBILL.resultn      | =  | Missing     |                    |    |             |                    |    |              | -0.001780634 | 1309 |
| TBILL.resultn      | <  | 2.05        | Hemoglobin.resultn | =  | Missing     |                    |    |              | 0            | 1309 |
| TBILL.resultn      | <  | 2.05        | Hemoglobin.resultn | <  | 11.25       |                    |    |              | 0.002262002  | 1309 |
| TBILL.resultn      | <  | 2.05        | Hemoglobin.resultn | >= | 11.25       |                    |    |              | -0.001772063 | 1309 |
| TBILL.resultn      | >= | 2.05        | ALK.times.uln      | =  | Missing     |                    |    |              | -0.000182344 | 1309 |
| TBILL.resultn      | >= | 2.05        | ALK.times.uln      | <  | 5.061752988 |                    |    |              | -0.000347786 | 1309 |
| TBILL.resultn      | >= | 2.05        | ALK.times.uln      | >= | 5.061752988 |                    |    |              | 3.27E-05     | 1309 |
| TBILL.resultn      | =  | Missing     |                    |    |             |                    |    | Missing      | -0.001876381 | 1310 |
| TBILL.resultn      | <  | 0.95        |                    |    |             |                    |    | Missing      | -0.002378984 | 1310 |
| TBILL.resultn      | >= | 0.95        | psc.yrs.dur        | =  | Missing     |                    |    | Missing      | -0.001300856 | 1310 |
| TBILL.resultn      | >= | 0.95        | psc.yrs.dur        | <  | 6.783025325 | Hemoglobin.resultn | =  | Missing      | 0            | 1310 |
| TBILL.resultn      | >= | 0.95        | psc.yrs.dur        | <  | 6.783025325 | Hemoglobin.resultn | <  | 13.25        | -0.001197021 | 1310 |
| TBILL.resultn      | >= | 0.95        | psc.yrs.dur        | <  | 6.783025325 | Hemoglobin.resultn | >= | 13.25        | -0.002533952 | 1310 |
| TBILL.resultn      | >= | 0.95        | psc.yrs.dur        | >= | 6.783025325 |                    |    | Missing      | 0.00044512   | 1310 |
| TBILL.resultn      | =  | Missing     |                    |    |             |                    |    |              | 0.000502031  | 1311 |
| TBILL.resultn      | <  | 1.65        | Sodium.resultn     | =  | Missing     |                    |    |              | 0            | 1311 |
| TBILL.resultn      | <  | 1.65        | Sodium.resultn     | <  | 142.5       |                    |    |              | -0.000223233 | 1311 |
| TBILL.resultn      | <  | 1.65        | Sodium.resultn     | >= | 142.5       |                    |    |              | 0.002502431  | 1311 |
| TBILL.resultn      | >= | 1.65        | ALB.resultn        | =  | Missing     |                    |    |              | 0.001353223  | 1311 |

|                    |    |             |                    |    |             |               |              |              |              |      |
|--------------------|----|-------------|--------------------|----|-------------|---------------|--------------|--------------|--------------|------|
| TBILL.resultn      | >= | 1.65        | ALB.resultn        | <  | 3.545       |               | 0.00297585   | 1311         |              |      |
| TBILL.resultn      | >= | 1.65        | ALB.resultn        | >= | 3.545       |               | 0.000365537  | 1311         |              |      |
| ALB.resultn        | =  | Missing     |                    |    |             | Missing       | -0.003331418 | 1312         |              |      |
| ALB.resultn        | <  | 3.615       | PLT.resultn        | =  | Missing     | Missing       | -0.001428913 | 1312         |              |      |
| ALB.resultn        | <  | 3.615       | PLT.resultn        | <  | 222.5       | Missing       | 0.001082168  | 1312         |              |      |
| ALB.resultn        | <  | 3.615       | PLT.resultn        | >= | 222.5       | ALB.resultn   | =            | Missing      | -0.002146365 | 1312 |
| ALB.resultn        | <  | 3.615       | PLT.resultn        | >= | 222.5       | ALB.resultn   | <            | 3.53         | -0.003004911 | 1312 |
| ALB.resultn        | <  | 3.615       | PLT.resultn        | >= | 222.5       | ALB.resultn   | >=           | 3.53         | 0            | 1312 |
| ALB.resultn        | >= | 3.615       |                    |    |             | Missing       | -0.002562923 | 1312         |              |      |
| ALK.times.uln      | =  | Missing     | age.yrs            | =  | Missing     | Missing       | -0.002337546 | 1313         |              |      |
| ALK.times.uln      | =  | Missing     | age.yrs            | <  | 53.55509925 | Missing       | -0.002796429 | 1313         |              |      |
| ALK.times.uln      | =  | Missing     | age.yrs            | >= | 53.55509925 | AST.resultn   | =            | Missing      | -0.001548269 | 1313 |
| ALK.times.uln      | =  | Missing     | age.yrs            | >= | 53.55509925 | AST.resultn   | <            | 52.5         | -0.002764765 | 1313 |
| ALK.times.uln      | =  | Missing     | age.yrs            | >= | 53.55509925 | AST.resultn   | >=           | 52.5         | 0            | 1313 |
| ALK.times.uln      | <  | 5.926121601 |                    |    |             | Missing       | -0.002263615 | 1313         |              |      |
| ALK.times.uln      | >= | 5.926121601 |                    |    |             | Missing       | -0.000930851 | 1313         |              |      |
| TBILL.resultn      | =  | Missing     |                    |    |             |               | 0.003148161  | 1314         |              |      |
| TBILL.resultn      | <  | 1.65        | ALK.times.uln      | =  | Missing     |               | 0            | 1314         |              |      |
| TBILL.resultn      | <  | 1.65        | ALK.times.uln      | <  | 2.905037968 |               | -0.000105815 | 1314         |              |      |
| TBILL.resultn      | <  | 1.65        | ALK.times.uln      | >= | 2.905037968 |               | 0.001551844  | 1314         |              |      |
| TBILL.resultn      | >= | 1.65        | Hemoglobin.resultn | =  | Missing     |               | 0.0007514    | 1314         |              |      |
| TBILL.resultn      | >= | 1.65        | Hemoglobin.resultn | <  | 12.75       |               | 0.001916936  | 1314         |              |      |
| TBILL.resultn      | >= | 1.65        | Hemoglobin.resultn | >= | 12.75       |               | -0.000330884 | 1314         |              |      |
| TBILL.resultn      | =  | Missing     |                    |    |             | Missing       | -0.002638904 | 1315         |              |      |
| TBILL.resultn      | <  | 0.75        |                    |    |             | Missing       | -0.002467402 | 1315         |              |      |
| TBILL.resultn      | >= | 0.75        | age.yrs            | =  | Missing     | Missing       | -0.001505516 | 1315         |              |      |
| TBILL.resultn      | >= | 0.75        | age.yrs            | <  | 51.58521561 | Missing       | -0.001941604 | 1315         |              |      |
| TBILL.resultn      | >= | 0.75        | age.yrs            | >= | 51.58521561 | psc.yrs.dur   | =            | Missing      | -0.000874581 | 1315 |
| TBILL.resultn      | >= | 0.75        | age.yrs            | >= | 51.58521561 | psc.yrs.dur   | <            | 0.465434634  | -0.002569081 | 1315 |
| TBILL.resultn      | >= | 0.75        | age.yrs            | >= | 51.58521561 | psc.yrs.dur   | >=           | 0.465434634  | 0            | 1315 |
| Hemoglobin.resultn | =  | Missing     | TBILL.resultn      | =  | Missing     |               | -0.000810057 | 1316         |              |      |
| Hemoglobin.resultn | =  | Missing     | TBILL.resultn      | <  | 1.2         |               | -0.000197962 | 1316         |              |      |
| Hemoglobin.resultn | =  | Missing     | TBILL.resultn      | >= | 1.2         |               | 0.002511373  | 1316         |              |      |
| Hemoglobin.resultn | <  | 13.85       | psc.yrs.dur        | =  | Missing     |               | 0.000498135  | 1316         |              |      |
| Hemoglobin.resultn | <  | 13.85       | psc.yrs.dur        | <  | 0.006844627 |               | 0.003371991  | 1316         |              |      |
| Hemoglobin.resultn | <  | 13.85       | psc.yrs.dur        | >= | 0.006844627 |               | 0            | 1316         |              |      |
| Hemoglobin.resultn | >= | 13.85       |                    |    |             |               | -0.000839191 | 1316         |              |      |
| ALB.resultn        | =  | Missing     |                    |    |             | Missing       | -0.003148924 | 1317         |              |      |
| ALB.resultn        | <  | 2.915       |                    |    |             | Missing       | -0.000973135 | 1317         |              |      |
| ALB.resultn        | >= | 2.915       | psc.yrs.dur        | =  | Missing     | Missing       | -0.002441442 | 1317         |              |      |
| ALB.resultn        | >= | 2.915       | psc.yrs.dur        | <  | 7.404517454 | Missing       | -0.002591276 | 1317         |              |      |
| ALB.resultn        | >= | 2.915       | psc.yrs.dur        | >= | 7.404517454 | AST.resultn   | =            | Missing      | -0.001387056 | 1317 |
| ALB.resultn        | >= | 2.915       | psc.yrs.dur        | >= | 7.404517454 | AST.resultn   | <            | 47           | -0.003120877 | 1317 |
| ALB.resultn        | >= | 2.915       | psc.yrs.dur        | >= | 7.404517454 | AST.resultn   | >=           | 47           | 0            | 1317 |
| PLT.resultn        | =  | Missing     |                    |    |             |               | -0.000584527 | 1318         |              |      |
| PLT.resultn        | <  | 209.5       | TBILL.resultn      | =  | Missing     |               | 0.000957891  | 1318         |              |      |
| PLT.resultn        | <  | 209.5       | TBILL.resultn      | <  | 1.65        |               | 0.000421547  | 1318         |              |      |
| PLT.resultn        | <  | 209.5       | TBILL.resultn      | >= | 1.65        |               | 0.00244315   | 1318         |              |      |
| PLT.resultn        | >= | 209.5       | ALK.times.uln      | =  | Missing     |               | 0            | 1318         |              |      |
| PLT.resultn        | >= | 209.5       | ALK.times.uln      | <  | 5.462893197 |               | -0.00035429  | 1318         |              |      |
| PLT.resultn        | >= | 209.5       | ALK.times.uln      | >= | 5.462893197 |               | 0.001024372  | 1318         |              |      |
| ALB.resultn        | =  | Missing     |                    |    |             | Missing       | -0.002379401 | 1319         |              |      |
| ALB.resultn        | <  | 2.95        |                    |    |             | Missing       | -0.000563508 | 1319         |              |      |
| ALB.resultn        | >= | 2.95        | TBILL.resultn      | =  | Missing     | Missing       | -0.002328112 | 1319         |              |      |
| ALB.resultn        | >= | 2.95        | TBILL.resultn      | <  | 2.65        | TBILL.resultn | =            | Missing      | -0.002322969 | 1319 |
| ALB.resultn        | >= | 2.95        | TBILL.resultn      | <  | 2.65        | TBILL.resultn | <            | 1.65         | -0.00248275  | 1319 |
| ALB.resultn        | >= | 2.95        | TBILL.resultn      | <  | 2.65        | TBILL.resultn | >=           | 1.65         | 0            | 1319 |
| ALB.resultn        | >= | 2.95        | TBILL.resultn      | >= | 2.65        |               | Missing      | -0.002422564 | 1319         |      |
| age.yrs            | =  | Missing     |                    |    |             | Missing       | -0.000252663 | 1320         |              |      |
| age.yrs            | <  | 54.79671458 |                    |    |             | Missing       | -0.00056283  | 1320         |              |      |
| age.yrs            | >= | 54.79671458 | AST.resultn        | =  | Missing     | Missing       | 0.000707851  | 1320         |              |      |
| age.yrs            | >= | 54.79671458 | AST.resultn        | <  | 51.5        | Missing       | -0.001193564 | 1320         |              |      |

|               |    |             |                    |    |             |               |    |             |              |      |
|---------------|----|-------------|--------------------|----|-------------|---------------|----|-------------|--------------|------|
| age.yrs       | >= | 54.79671458 | AST.resultn        | >= | 51.5        | AST.resultn   | =  | Missing     | 0.00254793   | 1320 |
| age.yrs       | >= | 54.79671458 | AST.resultn        | >= | 51.5        | AST.resultn   | <  | 72          | 0.005265721  | 1320 |
| age.yrs       | >= | 54.79671458 | AST.resultn        | >= | 51.5        | AST.resultn   | >= | 72          | 0            | 1320 |
| ALK.times.uln | =  | Missing     |                    |    |             |               |    |             | -0.006845105 | 1321 |
| ALK.times.uln | <  | 5.438574341 | age.yrs            | =  | Missing     |               |    |             | -0.006653609 | 1321 |
| ALK.times.uln | <  | 5.438574341 | age.yrs            | <  | 67.86858316 |               |    |             | -0.007061806 | 1321 |
| ALK.times.uln | <  | 5.438574341 | age.yrs            | >= | 67.86858316 |               |    |             | 0            | 1321 |
| ALK.times.uln | >= | 5.438574341 | ALK.times.uln      | =  | Missing     |               |    |             | -0.005356224 | 1321 |
| ALK.times.uln | >= | 5.438574341 | ALK.times.uln      | <  | 7.794978567 |               |    |             | -0.00424845  | 1321 |
| ALK.times.uln | >= | 5.438574341 | ALK.times.uln      | >= | 7.794978567 |               |    |             | -0.006371683 | 1321 |
| ALB.resultn   | =  | Missing     |                    |    |             |               |    | Missing     | -0.001399739 | 1322 |
| ALB.resultn   | <  | 2.965       |                    |    |             |               |    | Missing     | 0.000447122  | 1322 |
| ALB.resultn   | >= | 2.965       | TBILL.resultn      | =  | Missing     |               |    | Missing     | -0.001267024 | 1322 |
| ALB.resultn   | >= | 2.965       | TBILL.resultn      | <  | 2.65        | TBILL.resultn | =  | Missing     | -0.00125699  | 1322 |
| ALB.resultn   | >= | 2.965       | TBILL.resultn      | <  | 2.65        | TBILL.resultn | <  | 1.25        | -0.001571237 | 1322 |
| ALB.resultn   | >= | 2.965       | TBILL.resultn      | <  | 2.65        | TBILL.resultn | >= | 1.25        | 0            | 1322 |
| ALB.resultn   | >= | 2.965       | TBILL.resultn      | >= | 2.65        |               |    | Missing     | -0.00145403  | 1322 |
| TBILL.resultn | =  | Missing     |                    |    |             |               |    |             | -0.001191362 | 1323 |
| TBILL.resultn | <  | 2.05        | ALK.times.uln      | =  | Missing     |               |    |             | -0.00028221  | 1323 |
| TBILL.resultn | <  | 2.05        | ALK.times.uln      | <  | 5.92438247  |               |    |             | -0.000872196 | 1323 |
| TBILL.resultn | <  | 2.05        | ALK.times.uln      | >= | 5.92438247  |               |    |             | 0.001047883  | 1323 |
| TBILL.resultn | >= | 2.05        | Hemoglobin.resultn | =  | Missing     |               |    |             | 0.000305816  | 1323 |
| TBILL.resultn | >= | 2.05        | Hemoglobin.resultn | <  | 12.9        |               |    |             | 0.000642213  | 1323 |
| TBILL.resultn | >= | 2.05        | Hemoglobin.resultn | >= | 12.9        |               |    |             | 0            | 1323 |
| ALB.resultn   | =  | Missing     | psc.yrs.dur        | =  | Missing     |               |    |             | 0.001037284  | 1324 |
| ALB.resultn   | =  | Missing     | psc.yrs.dur        | <  | 0.203969884 |               |    |             | 0.003423039  | 1324 |
| ALB.resultn   | =  | Missing     | psc.yrs.dur        | >= | 0.203969884 |               |    |             | 0            | 1324 |
| ALB.resultn   | <  | 3.31        | TBILL.resultn      | =  | Missing     |               |    |             | 0.001925841  | 1324 |
| ALB.resultn   | <  | 3.31        | TBILL.resultn      | <  | 1.31        |               |    |             | 0.001063995  | 1324 |
| ALB.resultn   | <  | 3.31        | TBILL.resultn      | >= | 1.31        |               |    |             | 0.00304624   | 1324 |
| ALB.resultn   | >= | 3.31        |                    |    |             |               |    |             | 0.000634608  | 1324 |
| ALB.resultn   | =  | Missing     |                    |    |             |               |    |             | 0.000731254  | 1325 |
| ALB.resultn   | <  | 3.33        | psc.yrs.dur        | =  | Missing     |               |    |             | 0.001781035  | 1325 |
| ALB.resultn   | <  | 3.33        | psc.yrs.dur        | <  | 1.70294319  |               |    |             | 0.000610046  | 1325 |
| ALB.resultn   | <  | 3.33        | psc.yrs.dur        | >= | 1.70294319  |               |    |             | 0.002861949  | 1325 |
| ALB.resultn   | >= | 3.33        | TBILL.resultn      | =  | Missing     |               |    |             | 0.000676619  | 1325 |
| ALB.resultn   | >= | 3.33        | TBILL.resultn      | <  | 1.75        |               |    |             | 0.000739475  | 1325 |
| ALB.resultn   | >= | 3.33        | TBILL.resultn      | >= | 1.75        |               |    |             | 0            | 1325 |
| age.yrs       | =  | Missing     |                    |    |             |               |    | Missing     | -0.00475837  | 1326 |
| age.yrs       | <  | 55.69883641 |                    |    |             |               |    | Missing     | -0.004948002 | 1326 |
| age.yrs       | >= | 55.69883641 | AST.resultn        | =  | Missing     |               |    | Missing     | -0.003965012 | 1326 |
| age.yrs       | >= | 55.69883641 | AST.resultn        | <  | 54.5        |               |    | Missing     | -0.005491491 | 1326 |
| age.yrs       | >= | 55.69883641 | AST.resultn        | >= | 54.5        | psc.yrs.dur   | =  | Missing     | -0.001904265 | 1326 |
| age.yrs       | >= | 55.69883641 | AST.resultn        | >= | 54.5        | psc.yrs.dur   | <  | 0.750171116 | -0.003808529 | 1326 |
| age.yrs       | >= | 55.69883641 | AST.resultn        | >= | 54.5        | psc.yrs.dur   | >= | 0.750171116 | 0            | 1326 |
| age.yrs       | =  | Missing     |                    |    |             |               |    | Missing     | -0.003163479 | 1327 |
| age.yrs       | <  | 53.46475017 |                    |    |             |               |    | Missing     | -0.003300418 | 1327 |
| age.yrs       | >= | 53.46475017 | AST.resultn        | =  | Missing     |               |    | Missing     | -0.002773409 | 1327 |
| age.yrs       | >= | 53.46475017 | AST.resultn        | <  | 51.5        |               |    | Missing     | -0.003833573 | 1327 |
| age.yrs       | >= | 53.46475017 | AST.resultn        | >= | 51.5        | psc.yrs.dur   | =  | Missing     | -0.001457344 | 1327 |
| age.yrs       | >= | 53.46475017 | AST.resultn        | >= | 51.5        | psc.yrs.dur   | <  | 0.607802875 | -0.002486057 | 1327 |
| age.yrs       | >= | 53.46475017 | AST.resultn        | >= | 51.5        | psc.yrs.dur   | >= | 0.607802875 | 0            | 1327 |
| age.yrs       | =  | Missing     |                    |    |             |               |    | Missing     | -0.001884892 | 1328 |
| age.yrs       | <  | 68.89117043 | ALK.times.uln      | =  | Missing     |               |    | Missing     | -0.002116717 | 1328 |
| age.yrs       | <  | 68.89117043 | ALK.times.uln      | <  | 7.878362224 | ALK.times.uln | =  | Missing     | -0.001931564 | 1328 |
| age.yrs       | <  | 68.89117043 | ALK.times.uln      | <  | 7.878362224 | ALK.times.uln | <  | 6.02        | -0.002067764 | 1328 |
| age.yrs       | <  | 68.89117043 | ALK.times.uln      | >= | 7.878362224 | ALK.times.uln | >= | 6.02        | 0            | 1328 |
| age.yrs       | >= | 68.89117043 |                    |    |             |               |    | Missing     | -0.002538179 | 1328 |
| age.yrs       | >= | 68.89117043 |                    |    |             |               |    | Missing     | 0.001101054  | 1328 |
| PLT.resultn   | =  | Missing     |                    |    |             |               |    | Missing     | -0.003539012 | 1329 |
| PLT.resultn   | <  | 249.5       | AST.resultn        | =  | Missing     |               |    | Missing     | -0.002224111 | 1329 |
| PLT.resultn   | <  | 249.5       | AST.resultn        | <  | 56.5        |               |    | Missing     | -0.003500186 | 1329 |

|                |    |             |               |    |             |               |    |             |              |      |
|----------------|----|-------------|---------------|----|-------------|---------------|----|-------------|--------------|------|
| PLT.resultn    | <  | 249.5       | AST.resultn   | >= | 56.5        | psc.yrs.dur   | =  | Missing     | -0.001126686 | 1329 |
| PLT.resultn    | <  | 249.5       | AST.resultn   | >= | 56.5        | psc.yrs.dur   | <  | 0.454483231 | -0.002816715 | 1329 |
| PLT.resultn    | <  | 249.5       | AST.resultn   | >= | 56.5        | psc.yrs.dur   | >= | 0.454483231 | 0            | 1329 |
| PLT.resultn    | >= | 249.5       |               |    |             |               |    | Missing     | -0.003162946 | 1329 |
| Sodium.resultn | =  | Missing     |               |    |             |               |    | Missing     | -0.00288391  | 1330 |
| Sodium.resultn | <  | 141.5       | PLT.resultn   | =  | Missing     |               |    | Missing     | -0.002132309 | 1330 |
| Sodium.resultn | <  | 141.5       | PLT.resultn   | <  | 219         | TBILL.resultn | =  | Missing     | -0.001223231 | 1330 |
| Sodium.resultn | <  | 141.5       | PLT.resultn   | <  | 219         | TBILL.resultn | <  | 1.05        | -0.002668867 | 1330 |
| Sodium.resultn | <  | 141.5       | PLT.resultn   | <  | 219         | TBILL.resultn | >= | 1.05        | 0            | 1330 |
| Sodium.resultn | <  | 141.5       | PLT.resultn   | >= | 219         |               |    | Missing     | -0.002406128 | 1330 |
| Sodium.resultn | >= | 141.5       |               |    |             |               |    | Missing     | -0.003272962 | 1330 |
| ALB.resultn    | =  | Missing     |               |    |             |               |    | Missing     | -0.000637899 | 1331 |
| ALB.resultn    | <  | 2.95        |               |    |             |               |    | Missing     | 5.95E-05     | 1331 |
| ALB.resultn    | >= | 2.95        | age.yrs       | =  | Missing     |               |    | Missing     | -0.001871283 | 1331 |
| ALB.resultn    | >= | 2.95        | age.yrs       | <  | 53.35934292 |               |    | Missing     | -0.002152089 | 1331 |
| ALB.resultn    | >= | 2.95        | age.yrs       | >= | 53.35934292 | AST.resultn   | =  | Missing     | -0.001264249 | 1331 |
| ALB.resultn    | >= | 2.95        | age.yrs       | >= | 53.35934292 | AST.resultn   | <  | 51          | -0.00222907  | 1331 |
| ALB.resultn    | >= | 2.95        | age.yrs       | >= | 53.35934292 | AST.resultn   | >= | 51          | 0            | 1331 |
| ALB.resultn    | =  | Missing     |               |    |             |               |    | Missing     | -0.002812571 | 1332 |
| ALB.resultn    | <  | 2.915       |               |    |             |               |    | Missing     | 0.000128271  | 1332 |
| ALB.resultn    | >= | 2.915       | ALB.resultn   | =  | Missing     |               |    | Missing     | -0.001957101 | 1332 |
| ALB.resultn    | >= | 2.915       | ALB.resultn   | <  | 3.135       |               |    | Missing     | -0.002282364 | 1332 |
| ALB.resultn    | >= | 2.915       | ALB.resultn   | >= | 3.135       | TBILL.resultn | =  | Missing     | -0.001936772 | 1332 |
| ALB.resultn    | >= | 2.915       | ALB.resultn   | >= | 3.135       | TBILL.resultn | <  | 1.95        | -0.002098169 | 1332 |
| ALB.resultn    | >= | 2.915       | ALB.resultn   | >= | 3.135       | TBILL.resultn | >= | 1.95        | 0            | 1332 |
| AST.resultn    | =  | Missing     |               |    |             |               |    | Missing     | -0.002726913 | 1333 |
| AST.resultn    | <  | 52          |               |    |             |               |    | Missing     | -0.003364165 | 1333 |
| AST.resultn    | >= | 52          | age.yrs       | =  | Missing     |               |    | Missing     | -0.002073861 | 1333 |
| AST.resultn    | >= | 52          | age.yrs       | <  | 54.99931554 |               |    | Missing     | -0.002442372 | 1333 |
| AST.resultn    | >= | 52          | age.yrs       | >= | 54.99931554 | psc.yrs.dur   | =  | Missing     | -0.00104894  | 1333 |
| AST.resultn    | >= | 52          | age.yrs       | >= | 54.99931554 | psc.yrs.dur   | <  | 1.013004791 | -0.001678304 | 1333 |
| AST.resultn    | >= | 52          | age.yrs       | >= | 54.99931554 | psc.yrs.dur   | >= | 1.013004791 | 0            | 1333 |
| PLT.resultn    | =  | Missing     |               |    |             |               |    |             | -0.001189524 | 1334 |
| PLT.resultn    | <  | 206.5       | TBILL.resultn | =  | Missing     |               |    |             | -0.000463603 | 1334 |
| PLT.resultn    | <  | 206.5       | TBILL.resultn | <  | 1.65        |               |    |             | -0.000813453 | 1334 |
| PLT.resultn    | <  | 206.5       | TBILL.resultn | >= | 1.65        |               |    |             | 0.000411024  | 1334 |
| PLT.resultn    | >= | 206.5       | age.yrs       | =  | Missing     |               |    |             | -0.000991769 | 1334 |
| PLT.resultn    | >= | 206.5       | age.yrs       | <  | 53.4715948  |               |    |             | -0.001305711 | 1334 |
| PLT.resultn    | >= | 206.5       | age.yrs       | >= | 53.4715948  |               |    |             | 0            | 1334 |
| PLT.resultn    | =  | Missing     |               |    |             |               |    |             | 0.000118234  | 1335 |
| PLT.resultn    | <  | 204.5       | ALB.resultn   | =  | Missing     |               |    |             | 0.001357321  | 1335 |
| PLT.resultn    | <  | 204.5       | ALB.resultn   | <  | 3.92        |               |    |             | 0.003047356  | 1335 |
| PLT.resultn    | <  | 204.5       | ALB.resultn   | >= | 3.92        |               |    |             | 0.000435483  | 1335 |
| PLT.resultn    | >= | 204.5       | TBILL.resultn | =  | Missing     |               |    |             | 0.000163607  | 1335 |
| PLT.resultn    | >= | 204.5       | TBILL.resultn | <  | 1.25        |               |    |             | 0.000210688  | 1335 |
| PLT.resultn    | >= | 204.5       | TBILL.resultn | >= | 1.25        |               |    |             | 0            | 1335 |
| ALK.times.uln  | =  | Missing     | TBILL.resultn | =  | Missing     |               |    |             | -0.000612657 | 1336 |
| ALK.times.uln  | =  | Missing     | TBILL.resultn | <  | 0.95        |               |    |             | -0.000651774 | 1336 |
| ALK.times.uln  | =  | Missing     | TBILL.resultn | >= | 0.95        |               |    |             | 0.001434508  | 1336 |
| ALK.times.uln  | <  | 5.462893197 | PLT.resultn   | =  | Missing     |               |    |             | 0            | 1336 |
| ALK.times.uln  | <  | 5.462893197 | PLT.resultn   | <  | 209.5       |               |    |             | 0.000945184  | 1336 |
| ALK.times.uln  | <  | 5.462893197 | PLT.resultn   | >= | 209.5       |               |    |             | -0.000292907 | 1336 |
| ALK.times.uln  | >= | 5.462893197 |               |    |             |               |    |             | 0.001648229  | 1336 |
| ALK.times.uln  | =  | Missing     | TBILL.resultn | =  | Missing     |               |    |             | -0.001338214 | 1337 |
| ALK.times.uln  | =  | Missing     | TBILL.resultn | <  | 0.75        |               |    |             | -0.001414176 | 1337 |
| ALK.times.uln  | =  | Missing     | TBILL.resultn | >= | 0.75        |               |    |             | 0.001166155  | 1337 |
| ALK.times.uln  | <  | 5.926121601 | TBILL.resultn | =  | Missing     |               |    |             | -0.000865937 | 1337 |
| ALK.times.uln  | <  | 5.926121601 | TBILL.resultn | <  | 2.65        |               |    |             | -0.000915703 | 1337 |
| ALK.times.uln  | <  | 5.926121601 | TBILL.resultn | >= | 2.65        |               |    |             | 0            | 1337 |
| ALK.times.uln  | >= | 5.926121601 |               |    |             |               |    |             | 0.000383131  | 1337 |
| psc.yrs.dur    | =  | Missing     |               |    |             |               |    | Missing     | -0.00021215  | 1338 |
| psc.yrs.dur    | <  | 1.961670089 |               |    |             |               |    | Missing     | -0.000514678 | 1338 |



|                    |    |             |                |    |             |               |         |              |              |      |
|--------------------|----|-------------|----------------|----|-------------|---------------|---------|--------------|--------------|------|
| psc.yrs.dur        | >= | 1.961670089 | ALK.times.uln  | =  | Missing     |               | Missing | 0.000235825  | 1338         |      |
| psc.yrs.dur        | >= | 1.961670089 | ALK.times.uln  | <  | 2.822501299 |               | Missing | -0.000692135 | 1338         |      |
| psc.yrs.dur        | >= | 1.961670089 | ALK.times.uln  | >= | 2.822501299 | ALK.times.uln | =       | Missing      | 0.002088314  | 1338 |
| psc.yrs.dur        | >= | 1.961670089 | ALK.times.uln  | >= | 2.822501299 | ALK.times.uln | <       | 4.565737052  | 0.004803123  | 1338 |
| psc.yrs.dur        | >= | 1.961670089 | ALK.times.uln  | >= | 2.822501299 | ALK.times.uln | >=      | 4.565737052  | 0            | 1338 |
| age.yrs            | =  | Missing     |                |    |             |               | Missing | -0.003450044 | 1339         |      |
| age.yrs            | <  | 49.41957563 |                |    |             |               | Missing | -0.003753048 | 1339         |      |
| age.yrs            | >= | 49.41957563 | AST.resultn    | =  | Missing     |               | Missing | -0.002858129 | 1339         |      |
| age.yrs            | >= | 49.41957563 | AST.resultn    | <  | 58.5        |               | Missing | -0.004038053 | 1339         |      |
| age.yrs            | >= | 49.41957563 | AST.resultn    | >= | 58.5        | psc.yrs.dur   | =       | Missing      | -0.001496678 | 1339 |
| age.yrs            | >= | 49.41957563 | AST.resultn    | >= | 58.5        | psc.yrs.dur   | <       | 0.454483231  | -0.003648152 | 1339 |
| age.yrs            | >= | 49.41957563 | AST.resultn    | >= | 58.5        | psc.yrs.dur   | >=      | 0.454483231  | 0            | 1339 |
| ALB.resultn        | =  | Missing     |                |    |             |               | Missing | -0.000317819 | 1340         |      |
| ALB.resultn        | <  | 2.915       |                |    |             |               | Missing | 0.001336793  | 1340         |      |
| ALB.resultn        | >= | 2.915       | psc.yrs.dur    | =  | Missing     |               | Missing | 0.000135327  | 1340         |      |
| ALB.resultn        | >= | 2.915       | psc.yrs.dur    | <  | 12.63107461 | ALB.resultn   | =       | Missing      | -1.71E-05    | 1340 |
| ALB.resultn        | >= | 2.915       | psc.yrs.dur    | <  | 12.63107461 | ALB.resultn   | <       | 3.21         | -0.000346492 | 1340 |
| ALB.resultn        | >= | 2.915       | psc.yrs.dur    | <  | 12.63107461 | ALB.resultn   | >=      | 3.21         | 0            | 1340 |
| ALB.resultn        | >= | 2.915       | psc.yrs.dur    | >= | 12.63107461 |               | Missing | 0.003228956  | 1340         |      |
| psc.yrs.dur        | =  | Missing     |                |    |             |               | Missing | -0.002214148 | 1341         |      |
| psc.yrs.dur        | <  | 0.470910335 |                |    |             |               | Missing | -0.002669522 | 1341         |      |
| psc.yrs.dur        | >= | 0.470910335 | ALB.resultn    | =  | Missing     |               | Missing | -0.002975951 | 1341         |      |
| psc.yrs.dur        | >= | 0.470910335 | ALB.resultn    | <  | 3.35        |               | Missing | -0.00062473  | 1341         |      |
| psc.yrs.dur        | >= | 0.470910335 | ALB.resultn    | >= | 3.35        | age.yrs       | =       | Missing      | -0.001773864 | 1341 |
| psc.yrs.dur        | >= | 0.470910335 | ALB.resultn    | >= | 3.35        | age.yrs       | <       | 53.29226557  | -0.002473416 | 1341 |
| psc.yrs.dur        | >= | 0.470910335 | ALB.resultn    | >= | 3.35        | age.yrs       | >=      | 53.29226557  | 0            | 1341 |
| ALB.resultn        | =  | Missing     |                |    |             |               | Missing | -3.42E-05    | 1342         |      |
| ALB.resultn        | <  | 2.85        |                |    |             |               | Missing | 0.001999155  | 1342         |      |
| ALB.resultn        | >= | 2.85        | Sodium.resultn | =  | Missing     |               | Missing | 0.000928718  | 1342         |      |
| ALB.resultn        | >= | 2.85        | Sodium.resultn | <  | 137.5       | AST.resultn   | =       | Missing      | 0.002399913  | 1342 |
| ALB.resultn        | >= | 2.85        | Sodium.resultn | <  | 137.5       | AST.resultn   | <       | 67           | 0.004959819  | 1342 |
| ALB.resultn        | >= | 2.85        | Sodium.resultn | <  | 137.5       | AST.resultn   | >=      | 67           | 0            | 1342 |
| ALB.resultn        | >= | 2.85        | Sodium.resultn | >= | 137.5       |               | Missing | 0.000418055  | 1342         |      |
| Hemoglobin.resultn | =  | Missing     | TBILI.resultn  | =  | Missing     |               |         | 0.000633342  | 1343         |      |
| Hemoglobin.resultn | =  | Missing     | TBILI.resultn  | <  | 0.75        |               |         | -0.000596052 | 1343         |      |
| Hemoglobin.resultn | =  | Missing     | TBILI.resultn  | >= | 0.75        |               |         | 0.002450708  | 1343         |      |
| Hemoglobin.resultn | <  | 13.85       | psc.yrs.dur    | =  | Missing     |               |         | 0.000424895  | 1343         |      |
| Hemoglobin.resultn | <  | 13.85       | psc.yrs.dur    | <  | 0.031485284 |               |         | 0.002363481  | 1343         |      |
| Hemoglobin.resultn | <  | 13.85       | psc.yrs.dur    | >= | 0.031485284 |               |         | 0            | 1343         |      |
| Hemoglobin.resultn | >= | 13.85       |                |    |             |               |         | -0.000441706 | 1343         |      |
| TBILI.resultn      | =  | Missing     |                |    |             |               |         | -0.001512101 | 1344         |      |
| TBILI.resultn      | <  | 2.05        | TBILI.resultn  | =  | Missing     |               |         | -0.001003364 | 1344         |      |
| TBILI.resultn      | <  | 2.05        | TBILI.resultn  | <  | 0.95        |               |         | -0.001378038 | 1344         |      |
| TBILI.resultn      | <  | 2.05        | TBILI.resultn  | >= | 0.95        |               |         | 0            | 1344         |      |
| TBILI.resultn      | >= | 2.05        | PLT.resultn    | =  | Missing     |               |         | 0.0002368    | 1344         |      |
| TBILI.resultn      | >= | 2.05        | PLT.resultn    | <  | 229         |               |         | 0.000574921  | 1344         |      |
| TBILI.resultn      | >= | 2.05        | PLT.resultn    | >= | 229         |               |         | -4.50E-05    | 1344         |      |
| AST.resultn        | =  | Missing     |                |    |             |               | Missing | 0.00017888   | 1345         |      |
| AST.resultn        | <  | 144.5       | ALB.resultn    | =  | Missing     |               | Missing | 0.000896535  | 1345         |      |
| AST.resultn        | <  | 144.5       | ALB.resultn    | <  | 3.735       | PLT.resultn   | =       | Missing      | 0.001351615  | 1345 |
| AST.resultn        | <  | 144.5       | ALB.resultn    | <  | 3.735       | PLT.resultn   | <       | 249.5        | 0.004054845  | 1345 |
| AST.resultn        | <  | 144.5       | ALB.resultn    | <  | 3.735       | PLT.resultn   | >=      | 249.5        | 0            | 1345 |
| AST.resultn        | <  | 144.5       | ALB.resultn    | >= | 3.735       |               | Missing | -0.000124565 | 1345         |      |
| AST.resultn        | >= | 144.5       |                |    |             |               | Missing | -0.00059446  | 1345         |      |
| psc.yrs.dur        | =  | Missing     |                |    |             |               |         | 0.000964924  | 1346         |      |
| psc.yrs.dur        | <  | 6.324435318 | PLT.resultn    | =  | Missing     |               |         | 0            | 1346         |      |
| psc.yrs.dur        | <  | 6.324435318 | PLT.resultn    | <  | 185.5       |               |         | 0.00282776   | 1346         |      |
| psc.yrs.dur        | <  | 6.324435318 | PLT.resultn    | >= | 185.5       |               |         | 0.000620406  | 1346         |      |
| psc.yrs.dur        | >= | 6.324435318 | AST.resultn    | =  | Missing     |               |         | 0.002676504  | 1346         |      |
| psc.yrs.dur        | >= | 6.324435318 | AST.resultn    | <  | 47.5        |               |         | 9.28E-05     | 1346         |      |
| psc.yrs.dur        | >= | 6.324435318 | AST.resultn    | >= | 47.5        |               |         | 0.00444429   | 1346         |      |
| psc.yrs.dur        | =  | Missing     |                |    |             |               |         | -0.001542981 | 1347         |      |

|               |    |                           |    |                         |    |             |              |              |      |
|---------------|----|---------------------------|----|-------------------------|----|-------------|--------------|--------------|------|
| psc.yrs.dur   | <  | 7.976728268 age.yrs       | =  | Missing                 |    |             |              | -0.001750601 | 1347 |
| psc.yrs.dur   | <  | 7.976728268 age.yrs       | <  | 69.84257358             |    |             |              | -0.001847408 | 1347 |
| psc.yrs.dur   | <  | 7.976728268 age.yrs       | >= | 69.84257358             |    |             |              | 0            | 1347 |
| psc.yrs.dur   | >= | 7.976728268 ALB.resultn   | =  | Missing                 |    |             |              | 0.000358816  | 1347 |
| psc.yrs.dur   | >= | 7.976728268 ALB.resultn   | <  | 3.9                     |    |             |              | 0.001750113  | 1347 |
| psc.yrs.dur   | >= | 7.976728268 ALB.resultn   | >= | 3.9                     |    |             |              | -0.000818436 | 1347 |
| TBILL.resultn | =  | Missing                   |    |                         |    |             |              | 0.001508827  | 1348 |
| TBILL.resultn | <  | 1.65 psc.yrs.dur          | =  | Missing                 |    |             |              | 0.000207972  | 1348 |
| TBILL.resultn | <  | 1.65 psc.yrs.dur          | <  | 0.001368925             |    |             |              | 0.002560656  | 1348 |
| TBILL.resultn | <  | 1.65 psc.yrs.dur          | >= | 0.001368925             |    |             |              | 0            | 1348 |
| TBILL.resultn | >= | 1.65 Hemoglobin.resultn   | =  | Missing                 |    |             |              | 0.000580018  | 1348 |
| TBILL.resultn | >= | 1.65 Hemoglobin.resultn   | <  | 12.75                   |    |             |              | 0.001837937  | 1348 |
| TBILL.resultn | >= | 1.65 Hemoglobin.resultn   | >= | 12.75                   |    |             |              | -0.000318495 | 1348 |
| TBILL.resultn | =  | Missing                   |    |                         |    |             |              | -1.71E-05    | 1349 |
| TBILL.resultn | <  | 2.05 ALB.resultn          | =  | Missing                 |    |             |              | 0            | 1349 |
| TBILL.resultn | <  | 2.05 ALB.resultn          | <  | 3.35                    |    |             |              | -4.60E-06    | 1349 |
| TBILL.resultn | <  | 2.05 ALB.resultn          | >= | 3.35                    |    |             |              | 0.000765515  | 1349 |
| TBILL.resultn | >= | 2.05 ALB.resultn          | =  | Missing                 |    |             |              | 0.002378083  | 1349 |
| TBILL.resultn | >= | 2.05 ALB.resultn          | <  | 3.645                   |    |             |              | 0.002372296  | 1349 |
| TBILL.resultn | >= | 2.05 ALB.resultn          | >= | 3.645                   |    |             |              | 0.00238387   | 1349 |
| AST.resultn   | =  | Missing                   |    |                         |    | Missing     |              | -0.001044368 | 1350 |
| AST.resultn   | <  | 43                        |    |                         |    | Missing     |              | -0.001016033 | 1350 |
| AST.resultn   | >= | 43 psc.yrs.dur            | =  | Missing                 |    | Missing     |              | 0.000316058  | 1350 |
| AST.resultn   | >= | 43 psc.yrs.dur            | <  | 7.823408624 PLT.resultn | =  | Missing     |              | 0            | 1350 |
| AST.resultn   | >= | 43 psc.yrs.dur            | <  | 7.823408624 PLT.resultn | <  | 287         | 0.00050576   | 1350         |      |
| AST.resultn   | >= | 43 psc.yrs.dur            | <  | 7.823408624 PLT.resultn | >= | 287         | -0.000751818 | 1350         |      |
| AST.resultn   | >= | 43 psc.yrs.dur            | >= | 7.823408624             |    | Missing     |              | 0.002330352  | 1350 |
| age.yrs       | =  | Missing                   |    |                         |    | Missing     |              | -0.001234389 | 1351 |
| age.yrs       | <  | 69.55509925 TBILL.resultn | =  | Missing                 |    | Missing     |              | -8.52E-05    | 1351 |
| age.yrs       | <  | 69.55509925 TBILL.resultn | <  | 3.5 TBILL.resultn       | =  | Missing     |              | -0.001459941 | 1351 |
| age.yrs       | <  | 69.55509925 TBILL.resultn | <  | 3.5 TBILL.resultn       | <  | 2.25        | -0.001537149 | 1351         |      |
| age.yrs       | <  | 69.55509925 TBILL.resultn | <  | 3.5 TBILL.resultn       | >= | 2.25        | 0            | 1351         |      |
| age.yrs       | <  | 69.55509925 TBILL.resultn | >= | 3.5                     |    | Missing     |              | -0.001572896 | 1351 |
| age.yrs       | >= | 69.55509925               |    |                         |    | Missing     |              | 0.002319894  | 1351 |
| TBILL.resultn | =  | Missing                   |    |                         |    |             |              | -4.08E-05    | 1352 |
| TBILL.resultn | <  | 2.05 Hemoglobin.resultn   | =  | Missing                 |    |             |              | 0            | 1352 |
| TBILL.resultn | <  | 2.05 Hemoglobin.resultn   | <  | 13.85                   |    |             |              | -0.000434229 | 1352 |
| TBILL.resultn | <  | 2.05 Hemoglobin.resultn   | >= | 13.85                   |    |             |              | -0.001322402 | 1352 |
| TBILL.resultn | >= | 2.05 psc.yrs.dur          | =  | Missing                 |    |             |              | 0.000396017  | 1352 |
| TBILL.resultn | >= | 2.05 psc.yrs.dur          | <  | 0.438056126             |    |             |              | -0.000566503 | 1352 |
| TBILL.resultn | >= | 2.05 psc.yrs.dur          | >= | 0.438056126             |    |             |              | 0.001198116  | 1352 |
| psc.yrs.dur   | =  | Missing                   |    |                         |    | Missing     |              | -0.004573144 | 1353 |
| psc.yrs.dur   | <  | 6.410677618               |    |                         |    | Missing     |              | -0.004758724 | 1353 |
| psc.yrs.dur   | >= | 6.410677618 AST.resultn   | =  | Missing                 |    | Missing     |              | -0.003662503 | 1353 |
| psc.yrs.dur   | >= | 6.410677618 AST.resultn   | <  | 47                      |    | Missing     |              | -0.005389734 | 1353 |
| psc.yrs.dur   | >= | 6.410677618 AST.resultn   | >= | 47 age.yrs              | =  | Missing     |              | -0.00176255  | 1353 |
| psc.yrs.dur   | >= | 6.410677618 AST.resultn   | >= | 47 age.yrs              | <  | 51.58521561 | -0.003525099 | 1353         |      |
| psc.yrs.dur   | >= | 6.410677618 AST.resultn   | >= | 47 age.yrs              | >= | 51.58521561 | 0            | 1353         |      |
| ALB.resultn   | =  | Missing psc.yrs.dur       | =  | Missing                 |    |             |              | 0.00111525   | 1354 |
| ALB.resultn   | =  | Missing psc.yrs.dur       | <  | 0.154688569             |    |             |              | 0.00289965   | 1354 |
| ALB.resultn   | =  | Missing psc.yrs.dur       | >= | 0.154688569             |    |             |              | 0            | 1354 |
| ALB.resultn   | <  | 2.95                      |    |                         |    |             |              | 0.00272441   | 1354 |
| ALB.resultn   | >= | 2.95 TBILL.resultn        | =  | Missing                 |    |             |              | 0.000557284  | 1354 |
| ALB.resultn   | >= | 2.95 TBILL.resultn        | <  | 2.05                    |    |             |              | 0.000476395  | 1354 |
| ALB.resultn   | >= | 2.95 TBILL.resultn        | >= | 2.05                    |    |             |              | 0.001447066  | 1354 |
| ALB.resultn   | =  | Missing                   |    |                         |    | Missing     |              | -0.000554307 | 1355 |
| ALB.resultn   | <  | 2.95                      |    |                         |    | Missing     |              | 0.00049923   | 1355 |
| ALB.resultn   | >= | 2.95 Sodium.resultn       | =  | Missing                 |    | Missing     |              | -0.000454425 | 1355 |
| ALB.resultn   | >= | 2.95 Sodium.resultn       | <  | 136.5                   |    | Missing     |              | 0.001117461  | 1355 |
| ALB.resultn   | >= | 2.95 Sodium.resultn       | >= | 136.5 TBILL.resultn     | =  | Missing     |              | -0.001085723 | 1355 |
| ALB.resultn   | >= | 2.95 Sodium.resultn       | >= | 136.5 TBILL.resultn     | <  | 2.2         | -0.001236518 | 1355         |      |
| ALB.resultn   | >= | 2.95 Sodium.resultn       | >= | 136.5 TBILL.resultn     | >= | 2.2         | 0            | 1355         |      |

|                |    |             |                    |    |             |                |    |         |              |      |
|----------------|----|-------------|--------------------|----|-------------|----------------|----|---------|--------------|------|
| PLT.resultn    | =  | Missing     |                    |    |             |                |    |         | -0.001993426 | 1356 |
| PLT.resultn    | <  | 185.5       | TBILL.resultn      | =  | Missing     |                |    |         | -0.00031075  | 1356 |
| PLT.resultn    | <  | 185.5       | TBILL.resultn      | <  | 1.15        |                |    |         | -0.000569708 | 1356 |
| PLT.resultn    | <  | 185.5       | TBILL.resultn      | >= | 1.15        |                |    |         | 0            | 1356 |
| PLT.resultn    | >= | 185.5       | TBILL.resultn      | =  | Missing     |                |    |         | 0.000458565  | 1356 |
| PLT.resultn    | >= | 185.5       | TBILL.resultn      | <  | 3           |                |    |         | -0.001835276 | 1356 |
| PLT.resultn    | >= | 185.5       | TBILL.resultn      | >= | 3           |                |    |         | -0.002210482 | 1356 |
| ALK.times.uln  | =  | Missing     |                    |    |             | Missing        |    |         | 0.000252425  | 1357 |
| ALK.times.uln  | <  | 2.815208295 |                    |    |             | Missing        |    |         | -0.000382454 | 1357 |
| ALK.times.uln  | >= | 2.815208295 | PLT.resultn        | =  | Missing     |                |    |         | 0.001378748  | 1357 |
| ALK.times.uln  | >= | 2.815208295 | PLT.resultn        | <  | 210.5       |                |    |         | 0.003852817  | 1357 |
| ALK.times.uln  | >= | 2.815208295 | PLT.resultn        | >= | 210.5       | AST.resultn    | =  | Missing | 0.000873836  | 1357 |
| ALK.times.uln  | >= | 2.815208295 | PLT.resultn        | >= | 210.5       | AST.resultn    | <  | 64      | 0.004281798  | 1357 |
| ALK.times.uln  | >= | 2.815208295 | PLT.resultn        | >= | 210.5       | AST.resultn    | >= | 64      | 0            | 1357 |
| ALB.resultn    | =  | Missing     |                    |    |             |                |    |         | -0.000515658 | 1358 |
| ALB.resultn    | <  | 3.31        | psc.yrs.dur        | =  | Missing     |                |    |         | 0.001685683  | 1358 |
| ALB.resultn    | <  | 3.31        | psc.yrs.dur        | <  | 2.67761807  |                |    |         | 0.0001816    | 1358 |
| ALB.resultn    | <  | 3.31        | psc.yrs.dur        | >= | 2.67761807  |                |    |         | 0.003189766  | 1358 |
| ALB.resultn    | >= | 3.31        | TBILL.resultn      | =  | Missing     |                |    |         | -0.000610272 | 1358 |
| ALB.resultn    | >= | 3.31        | TBILL.resultn      | <  | 0.75        |                |    |         | -0.001185336 | 1358 |
| ALB.resultn    | >= | 3.31        | TBILL.resultn      | >= | 0.75        |                |    |         | 0            | 1358 |
| ALK.times.uln  | =  | Missing     | age.yrs            | =  | Missing     |                |    | Missing | -0.002299895 | 1359 |
| ALK.times.uln  | =  | Missing     | age.yrs            | <  | 53.46475017 |                |    | Missing | -0.002773073 | 1359 |
| ALK.times.uln  | =  | Missing     | age.yrs            | >= | 53.46475017 | TBILL.resultn  | =  | Missing | -0.001392972 | 1359 |
| ALK.times.uln  | =  | Missing     | age.yrs            | >= | 53.46475017 | TBILL.resultn  | <  | 0.75    | -0.002785944 | 1359 |
| ALK.times.uln  | =  | Missing     | age.yrs            | >= | 53.46475017 | TBILL.resultn  | >= | 0.75    | 0            | 1359 |
| ALK.times.uln  | <  | 5.438574341 |                    |    |             |                |    | Missing | -0.00252402  | 1359 |
| ALK.times.uln  | >= | 5.438574341 |                    |    |             |                |    | Missing | -0.000498311 | 1359 |
| Sodium.resultn | =  | Missing     |                    |    |             |                |    | Missing | -0.003091682 | 1360 |
| Sodium.resultn | <  | 136.5       |                    |    |             |                |    | Missing | -0.001120856 | 1360 |
| Sodium.resultn | >= | 136.5       | age.yrs            | =  | Missing     |                |    | Missing | -0.00272824  | 1360 |
| Sodium.resultn | >= | 136.5       | age.yrs            | <  | 53.56194387 |                |    | Missing | -0.003057571 | 1360 |
| Sodium.resultn | >= | 136.5       | age.yrs            | >= | 53.56194387 | AST.resultn    | =  | Missing | -0.00200371  | 1360 |
| Sodium.resultn | >= | 136.5       | age.yrs            | >= | 53.56194387 | AST.resultn    | <  | 51      | -0.00358998  | 1360 |
| Sodium.resultn | >= | 136.5       | age.yrs            | >= | 53.56194387 | AST.resultn    | >= | 51      | 0            | 1360 |
| age.yrs        | =  | Missing     |                    |    |             |                |    | Missing | 0.000114838  | 1361 |
| age.yrs        | <  | 69.71800137 | AST.resultn        | =  | Missing     |                |    | Missing | -0.000743587 | 1361 |
| age.yrs        | <  | 69.71800137 | AST.resultn        | <  | 213.5       | Sodium.resultn | =  | Missing | 0            | 1361 |
| age.yrs        | <  | 69.71800137 | AST.resultn        | <  | 213.5       | Sodium.resultn | <  | 136.5   | 0.001645679  | 1361 |
| age.yrs        | <  | 69.71800137 | AST.resultn        | <  | 213.5       | Sodium.resultn | >= | 136.5   | -0.000266896 | 1361 |
| age.yrs        | <  | 69.71800137 | AST.resultn        | >= | 213.5       |                |    | Missing | 0.001793109  | 1361 |
| age.yrs        | >= | 69.71800137 |                    |    |             |                |    | Missing | 0.002952017  | 1361 |
| TBILL.resultn  | =  | Missing     |                    |    |             |                |    | Missing | -0.001945579 | 1362 |
| TBILL.resultn  | <  | 0.95        |                    |    |             |                |    | Missing | -0.001571949 | 1362 |
| TBILL.resultn  | >= | 0.95        | Hemoglobin.resultn | =  | Missing     | ALB.resultn    | =  | Missing | 0.000698306  | 1362 |
| TBILL.resultn  | >= | 0.95        | Hemoglobin.resultn | =  | Missing     | ALB.resultn    | <  | 3.95    | 0.001460094  | 1362 |
| TBILL.resultn  | >= | 0.95        | Hemoglobin.resultn | =  | Missing     | ALB.resultn    | >= | 3.95    | 0            | 1362 |
| TBILL.resultn  | >= | 0.95        | Hemoglobin.resultn | <  | 13.35       |                |    | Missing | -0.000716448 | 1362 |
| TBILL.resultn  | >= | 0.95        | Hemoglobin.resultn | >= | 13.35       |                |    | Missing | -0.001600632 | 1362 |
| ALK.times.uln  | =  | Missing     |                    |    |             |                |    |         | -0.001883322 | 1363 |
| ALK.times.uln  | <  | 5.462893197 | TBILL.resultn      | =  | Missing     |                |    |         | -0.002149108 | 1363 |
| ALK.times.uln  | <  | 5.462893197 | TBILL.resultn      | <  | 1.65        |                |    |         | -0.002361191 | 1363 |
| ALK.times.uln  | <  | 5.462893197 | TBILL.resultn      | >= | 1.65        |                |    |         | 0            | 1363 |
| ALK.times.uln  | >= | 5.462893197 | AST.resultn        | =  | Missing     |                |    |         | -0.000445485 | 1363 |
| ALK.times.uln  | >= | 5.462893197 | AST.resultn        | <  | 138         |                |    |         | 0.00034301   | 1363 |
| ALK.times.uln  | >= | 5.462893197 | AST.resultn        | >= | 138         |                |    |         | -0.001549379 | 1363 |
| ALK.times.uln  | =  | Missing     | psc.yrs.dur        | =  | Missing     |                |    |         | -0.000454889 | 1364 |
| ALK.times.uln  | =  | Missing     | psc.yrs.dur        | <  | 0.396988364 |                |    |         | -0.001019579 | 1364 |
| ALK.times.uln  | =  | Missing     | psc.yrs.dur        | >= | 0.396988364 |                |    |         | 0            | 1364 |
| ALK.times.uln  | <  | 5.438574341 | TBILL.resultn      | =  | Missing     |                |    |         | -0.00067163  | 1364 |
| ALK.times.uln  | <  | 5.438574341 | TBILL.resultn      | <  | 2.85        |                |    |         | -0.000817268 | 1364 |
| ALK.times.uln  | <  | 5.438574341 | TBILL.resultn      | >= | 2.85        |                |    |         | 0.00165859   | 1364 |

|                |    |             |                |    |             |               |    |              |              |      |
|----------------|----|-------------|----------------|----|-------------|---------------|----|--------------|--------------|------|
| ALK.times.uln  | >= | 5.438574341 |                |    |             |               |    | 0.000881373  | 1364         |      |
| ALB.resultn    | =  | Missing     |                |    |             | Missing       |    | 0.000786837  | 1365         |      |
| ALB.resultn    | <  | 3.615       | PLT.resultn    | =  | Missing     | Missing       |    | 0.000524427  | 1365         |      |
| ALB.resultn    | <  | 3.615       | PLT.resultn    | <  | 219         | Missing       |    | 0.001620195  | 1365         |      |
| ALB.resultn    | <  | 3.615       | PLT.resultn    | >= | 219         | TBILL.resultn | =  | Missing      | 0.000178395  | 1365 |
| ALB.resultn    | <  | 3.615       | PLT.resultn    | >= | 219         | TBILL.resultn | <  | 0.65         | 0.000550051  | 1365 |
| ALB.resultn    | <  | 3.615       | PLT.resultn    | >= | 219         | TBILL.resultn | >= | 0.65         | 0            | 1365 |
| ALB.resultn    | >= | 3.615       |                |    |             | Missing       |    | -0.000207412 | 1365         |      |
| ALB.resultn    | =  | Missing     |                |    |             | Missing       |    | -0.001159519 | 1366         |      |
| ALB.resultn    | <  | 2.965       |                |    |             | Missing       |    | 0.001096391  | 1366         |      |
| ALB.resultn    | >= | 2.965       | Sodium.resultn | =  | Missing     | Missing       |    | -0.000833165 | 1366         |      |
| ALB.resultn    | >= | 2.965       | Sodium.resultn | <  | 136.5       | Missing       |    | 0.002381304  | 1366         |      |
| ALB.resultn    | >= | 2.965       | Sodium.resultn | >= | 136.5       | TBILL.resultn | =  | Missing      | -0.000552175 | 1366 |
| ALB.resultn    | >= | 2.965       | Sodium.resultn | >= | 136.5       | TBILL.resultn | <  | 0.75         | -0.001175598 | 1366 |
| ALB.resultn    | >= | 2.965       | Sodium.resultn | >= | 136.5       | TBILL.resultn | >= | 0.75         | 0            | 1366 |
| psc.yrs.dur    | =  | Missing     |                |    |             |               |    | -0.001368151 | 1367         |      |
| psc.yrs.dur    | <  | 7.817932923 | TBILL.resultn  | =  | Missing     |               |    | 0            | 1367         |      |
| psc.yrs.dur    | <  | 7.817932923 | TBILL.resultn  | <  | 2.6         |               |    | -0.001673878 | 1367         |      |
| psc.yrs.dur    | <  | 7.817932923 | TBILL.resultn  | >= | 2.6         |               |    | -0.001940368 | 1367         |      |
| psc.yrs.dur    | >= | 7.817932923 | ALB.resultn    | =  | Missing     |               |    | 0.000336023  | 1367         |      |
| psc.yrs.dur    | >= | 7.817932923 | ALB.resultn    | <  | 3.95        |               |    | 0.002397294  | 1367         |      |
| psc.yrs.dur    | >= | 7.817932923 | ALB.resultn    | >= | 3.95        |               |    | -0.001136313 | 1367         |      |
| ALK.times.uln  | =  | Missing     | psc.yrs.dur    | =  | Missing     |               |    | -0.001157491 | 1368         |      |
| ALK.times.uln  | =  | Missing     | psc.yrs.dur    | <  | 0.450376454 |               |    | -0.002493059 | 1368         |      |
| ALK.times.uln  | =  | Missing     | psc.yrs.dur    | >= | 0.450376454 |               |    | 0            | 1368         |      |
| ALK.times.uln  | <  | 5.446215139 |                |    |             |               |    | -0.002428387 | 1368         |      |
| ALK.times.uln  | >= | 5.446215139 | TBILL.resultn  | =  | Missing     |               |    | -0.00072057  | 1368         |      |
| ALK.times.uln  | >= | 5.446215139 | TBILL.resultn  | <  | 1.15        |               |    | -0.000666343 | 1368         |      |
| ALK.times.uln  | >= | 5.446215139 | TBILL.resultn  | >= | 1.15        |               |    | -0.000774797 | 1368         |      |
| ALK.times.uln  | =  | Missing     | psc.yrs.dur    | =  | Missing     |               |    | -0.000862912 | 1369         |      |
| ALK.times.uln  | =  | Missing     | psc.yrs.dur    | <  | 0.472279261 |               |    | -0.001844847 | 1369         |      |
| ALK.times.uln  | =  | Missing     | psc.yrs.dur    | >= | 0.472279261 |               |    | 0            | 1369         |      |
| ALK.times.uln  | <  | 6.02173913  | ALB.resultn    | =  | Missing     |               |    | -0.001827318 | 1369         |      |
| ALK.times.uln  | <  | 6.02173913  | ALB.resultn    | <  | 3.165       |               |    | 0.001118177  | 1369         |      |
| ALK.times.uln  | <  | 6.02173913  | ALB.resultn    | >= | 3.165       |               |    | -0.001406384 | 1369         |      |
| ALK.times.uln  | >= | 6.02173913  |                |    |             |               |    | 0.000217649  | 1369         |      |
| age.yrs        | =  | Missing     |                |    |             | Missing       |    | -0.0023817   | 1370         |      |
| age.yrs        | <  | 53.4715948  |                |    |             | Missing       |    | -0.002478546 | 1370         |      |
| age.yrs        | >= | 53.4715948  | AST.resultn    | =  | Missing     | Missing       |    | -0.002163176 | 1370         |      |
| age.yrs        | >= | 53.4715948  | AST.resultn    | <  | 57          | Missing       |    | -0.003069673 | 1370         |      |
| age.yrs        | >= | 53.4715948  | AST.resultn    | >= | 57          | psc.yrs.dur   | =  | Missing      | -0.000954514 | 1370 |
| age.yrs        | >= | 53.4715948  | AST.resultn    | >= | 57          | psc.yrs.dur   | <  | 0.73100616   | -0.001968685 | 1370 |
| age.yrs        | >= | 53.4715948  | AST.resultn    | >= | 57          | psc.yrs.dur   | >= | 0.73100616   | 0            | 1370 |
| psc.yrs.dur    | =  | Missing     |                |    |             | Missing       |    | -0.002053123 | 1371         |      |
| psc.yrs.dur    | <  | 1.916495551 |                |    |             | Missing       |    | -0.002256018 | 1371         |      |
| psc.yrs.dur    | >= | 1.916495551 | AST.resultn    | =  | Missing     | Missing       |    | -0.001550057 | 1371         |      |
| psc.yrs.dur    | >= | 1.916495551 | AST.resultn    | <  | 47          | Missing       |    | -0.002821582 | 1371         |      |
| psc.yrs.dur    | >= | 1.916495551 | AST.resultn    | >= | 47          | age.yrs       | =  | Missing      | -0.000815397 | 1371 |
| psc.yrs.dur    | >= | 1.916495551 | AST.resultn    | >= | 47          | age.yrs       | <  | 48.27378508  | -0.00152887  | 1371 |
| psc.yrs.dur    | >= | 1.916495551 | AST.resultn    | >= | 47          | age.yrs       | >= | 48.27378508  | 0            | 1371 |
| Sodium.resultn | =  | Missing     |                |    |             | Missing       |    | -0.00347648  | 1372         |      |
| Sodium.resultn | <  | 136.5       |                |    |             | Missing       |    | -0.001555756 | 1372         |      |
| Sodium.resultn | >= | 136.5       | PLT.resultn    | =  | Missing     | Missing       |    | -0.002915157 | 1372         |      |
| Sodium.resultn | >= | 136.5       | PLT.resultn    | <  | 197.5       | age.yrs       | =  | Missing      | -0.001237728 | 1372 |
| Sodium.resultn | >= | 136.5       | PLT.resultn    | <  | 197.5       | age.yrs       | <  | 46.32991102  | -0.002723002 | 1372 |
| Sodium.resultn | >= | 136.5       | PLT.resultn    | <  | 197.5       | age.yrs       | >= | 46.32991102  | 0            | 1372 |
| Sodium.resultn | >= | 136.5       | PLT.resultn    | >= | 197.5       |               |    | Missing      | -0.003208042 | 1372 |
| TBILL.resultn  | =  | Missing     |                |    |             | Missing       |    | -0.000446875 | 1373         |      |
| TBILL.resultn  | <  | 0.75        |                |    |             | Missing       |    | -0.0013056   | 1373         |      |
| TBILL.resultn  | >= | 0.75        | psc.yrs.dur    | =  | Missing     | Missing       |    | 0.000110057  | 1373         |      |
| TBILL.resultn  | >= | 0.75        | psc.yrs.dur    | <  | 2.05065024  | Missing       |    | -0.000623319 | 1373         |      |
| TBILL.resultn  | >= | 0.75        | psc.yrs.dur    | >= | 2.05065024  | psc.yrs.dur   | =  | Missing      | 0.001321721  | 1373 |

|                    |    |                  |                |                        |             |                |              |              |              |      |
|--------------------|----|------------------|----------------|------------------------|-------------|----------------|--------------|--------------|--------------|------|
| TBILL.resultn      | >= | 0.75 psc.yrs.dur | >=             | 2.05065024 psc.yrs.dur | <           | 3.498973306    | 0.004676858  | 1373         |              |      |
| TBILL.resultn      | >= | 0.75 psc.yrs.dur | >=             | 2.05065024 psc.yrs.dur | >=          | 3.498973306    | 0            | 1373         |              |      |
| ALK.times.uln      | =  | Missing          | ALB.resultn    | =                      | Missing     |                | -4.21E-05    | 1374         |              |      |
| ALK.times.uln      | =  | Missing          | ALB.resultn    | <                      | 3.45        |                | 0.002518651  | 1374         |              |      |
| ALK.times.uln      | =  | Missing          | ALB.resultn    | >=                     | 3.45        |                | 0.000329669  | 1374         |              |      |
| ALK.times.uln      | <  | 5.965616681      | ALB.resultn    | =                      | Missing     |                | 0            | 1374         |              |      |
| ALK.times.uln      | <  | 5.965616681      | ALB.resultn    | <                      | 3.14        |                | -3.86E-05    | 1374         |              |      |
| ALK.times.uln      | <  | 5.965616681      | ALB.resultn    | >=                     | 3.14        |                | 0.000774995  | 1374         |              |      |
| ALK.times.uln      | >= | 5.965616681      |                |                        |             |                | 0.001980449  | 1374         |              |      |
| PLT.resultn        | =  | Missing          |                |                        |             |                | -0.003398192 | 1375         |              |      |
| PLT.resultn        | <  | 185.5            | TBILL.resultn  | =                      | Missing     |                | -0.001468788 | 1375         |              |      |
| PLT.resultn        | <  | 185.5            | TBILL.resultn  | <                      | 1.25        |                | -0.001576258 | 1375         |              |      |
| PLT.resultn        | <  | 185.5            | TBILL.resultn  | >=                     | 1.25        |                | -0.001350572 | 1375         |              |      |
| PLT.resultn        | >= | 185.5            | age.yrs        | =                      | Missing     |                | -0.003268216 | 1375         |              |      |
| PLT.resultn        | >= | 185.5            | age.yrs        | <                      | 69.51266256 |                | -0.003437553 | 1375         |              |      |
| PLT.resultn        | >= | 185.5            | age.yrs        | >=                     | 69.51266256 |                | 0            | 1375         |              |      |
| Sodium.resultn     | =  | Missing          |                |                        |             | Missing        | -0.001745285 | 1376         |              |      |
| Sodium.resultn     | <  | 136.5            |                |                        |             | Missing        | 4.71E-05     | 1376         |              |      |
| Sodium.resultn     | >= | 136.5            | age.yrs        | =                      | Missing     |                | -0.001429079 | 1376         |              |      |
| Sodium.resultn     | >= | 136.5            | age.yrs        | <                      | 46.14921287 |                | -0.001787831 | 1376         |              |      |
| Sodium.resultn     | >= | 136.5            | age.yrs        | >=                     | 46.14921287 | AST.resultn    | =            | Missing      | -0.001055584 | 1376 |
| Sodium.resultn     | >= | 136.5            | age.yrs        | >=                     | 46.14921287 | AST.resultn    | <            | 57.5         | -0.001975837 | 1376 |
| Sodium.resultn     | >= | 136.5            | age.yrs        | >=                     | 46.14921287 | AST.resultn    | >=           | 57.5         | 0            | 1376 |
| age.yrs            | =  | Missing          |                |                        |             |                | Missing      | -0.003222508 | 1377         |      |
| age.yrs            | <  | 51.63175907      |                |                        |             |                | Missing      | -0.003524589 | 1377         |      |
| age.yrs            | >= | 51.63175907      | AST.resultn    | =                      | Missing     |                | Missing      | -0.002553342 | 1377         |      |
| age.yrs            | >= | 51.63175907      | AST.resultn    | <                      | 51.5        |                | Missing      | -0.003741162 | 1377         |      |
| age.yrs            | >= | 51.63175907      | AST.resultn    | >=                     | 51.5        | psc.yrs.dur    | =            | Missing      | -0.001269213 | 1377 |
| age.yrs            | >= | 51.63175907      | AST.resultn    | >=                     | 51.5        | psc.yrs.dur    | <            | 0.454483231  | -0.002608937 | 1377 |
| age.yrs            | >= | 51.63175907      | AST.resultn    | >=                     | 51.5        | psc.yrs.dur    | >=           | 0.454483231  | 0            | 1377 |
| psc.yrs.dur        | =  | Missing          |                |                        |             |                |              | 0.000511826  | 1378         |      |
| psc.yrs.dur        | <  | 6.410677618      | AST.resultn    | =                      | Missing     |                |              | 0.000397049  | 1378         |      |
| psc.yrs.dur        | <  | 6.410677618      | AST.resultn    | <                      | 73          |                |              | 0.000610171  | 1378         |      |
| psc.yrs.dur        | <  | 6.410677618      | AST.resultn    | >=                     | 73          |                |              | 0            | 1378         |      |
| psc.yrs.dur        | >= | 6.410677618      | AST.resultn    | =                      | Missing     |                |              | 0.001184979  | 1378         |      |
| psc.yrs.dur        | >= | 6.410677618      | AST.resultn    | <                      | 43          |                |              | -0.000491655 | 1378         |      |
| psc.yrs.dur        | >= | 6.410677618      | AST.resultn    | >=                     | 43          |                |              | 0.00267532   | 1378         |      |
| Sodium.resultn     | =  | Missing          | TBILL.resultn  | =                      | Missing     |                |              | -0.000694741 | 1379         |      |
| Sodium.resultn     | =  | Missing          | TBILL.resultn  | <                      | 1.25        |                |              | -0.001795152 | 1379         |      |
| Sodium.resultn     | =  | Missing          | TBILL.resultn  | >=                     | 1.25        |                |              | 0.000256354  | 1379         |      |
| Sodium.resultn     | <  | 136.5            |                |                        |             |                |              | 0.000752735  | 1379         |      |
| Sodium.resultn     | >= | 136.5            | ALB.resultn    | =                      | Missing     |                |              | -0.00084187  | 1379         |      |
| Sodium.resultn     | >= | 136.5            | ALB.resultn    | <                      | 4.25        |                |              | -0.001292172 | 1379         |      |
| Sodium.resultn     | >= | 136.5            | ALB.resultn    | >=                     | 4.25        |                |              | 0            | 1379         |      |
| Hemoglobin.resultn | =  | Missing          | TBILL.resultn  | =                      | Missing     |                |              | 0.000865243  | 1380         |      |
| Hemoglobin.resultn | =  | Missing          | TBILL.resultn  | <                      | 1.31        |                |              | 0.000245189  | 1380         |      |
| Hemoglobin.resultn | =  | Missing          | TBILL.resultn  | >=                     | 1.31        |                |              | 0.003448801  | 1380         |      |
| Hemoglobin.resultn | <  | 12.15            |                |                        |             |                |              | 4.55E-05     | 1380         |      |
| Hemoglobin.resultn | >= | 12.15            | Sodium.resultn | =                      | Missing     |                |              | 0            | 1380         |      |
| Hemoglobin.resultn | >= | 12.15            | Sodium.resultn | <                      | 137.5       |                |              | 0.002934852  | 1380         |      |
| Hemoglobin.resultn | >= | 12.15            | Sodium.resultn | >=                     | 137.5       |                |              | -0.000325688 | 1380         |      |
| ALB.resultn        | =  | Missing          |                |                        |             |                | Missing      | -0.002977499 | 1381         |      |
| ALB.resultn        | <  | 2.95             |                |                        |             |                | Missing      | -0.000586227 | 1381         |      |
| ALB.resultn        | >= | 2.95             | TBILL.resultn  | =                      | Missing     |                |              | -0.002076266 | 1381         |      |
| ALB.resultn        | >= | 2.95             | TBILL.resultn  | <                      | 2.65        | TBILL.resultn  | =            | Missing      | -0.00204757  | 1381 |
| ALB.resultn        | >= | 2.95             | TBILL.resultn  | <                      | 2.65        | TBILL.resultn  | <            | 1.65         | -0.002199242 | 1381 |
| ALB.resultn        | >= | 2.95             | TBILL.resultn  | <                      | 2.65        | TBILL.resultn  | >=           | 1.65         | 0            | 1381 |
| ALB.resultn        | >= | 2.95             | TBILL.resultn  | >=                     | 2.65        |                |              | Missing      | -0.00265881  | 1381 |
| age.yrs            | =  | Missing          |                |                        |             |                | Missing      | 0.000771926  | 1382         |      |
| age.yrs            | <  | 69.3798768       | ALK.times.uln  | =                      | Missing     | Sodium.resultn | =            | Missing      | 0            | 1382 |
| age.yrs            | <  | 69.3798768       | ALK.times.uln  | =                      | Missing     | Sodium.resultn | <            | 139.5        | 0.00078976   | 1382 |
| age.yrs            | <  | 69.3798768       | ALK.times.uln  | =                      | Missing     | Sodium.resultn | >=           | 139.5        | 0.002638555  | 1382 |

|               |    |             |                    |    |              |                    |              |              |              |      |
|---------------|----|-------------|--------------------|----|--------------|--------------------|--------------|--------------|--------------|------|
| age.yrs       | <  | 69.3798768  | ALK.times.uln      | <  | 5.857962963  | Missing            | 0.000367727  | 1382         |              |      |
| age.yrs       | <  | 69.3798768  | ALK.times.uln      | >= | 5.857962963  | Missing            | 0.001622138  | 1382         |              |      |
| age.yrs       | >= | 69.3798768  |                    |    |              | Missing            | 0.004006462  | 1382         |              |      |
| ALK.times.uln | =  | Missing     | TBILL.resultn      | =  | Missing      | Missing            | -0.001739574 | 1383         |              |      |
| ALK.times.uln | =  | Missing     | TBILL.resultn      | <  | 0.95         | Missing            | -0.002471483 | 1383         |              |      |
| ALK.times.uln | =  | Missing     | TBILL.resultn      | >= | 0.95 age.yrs | =                  | Missing      | -0.000531925 | 1383         |      |
| ALK.times.uln | =  | Missing     | TBILL.resultn      | >= | 0.95 age.yrs | <                  | 53.46475017  | -0.001063849 | 1383         |      |
| ALK.times.uln | =  | Missing     | TBILL.resultn      | >= | 0.95 age.yrs | >=                 | 53.46475017  | 0            | 1383         |      |
| ALK.times.uln | <  | 5.462893197 |                    |    |              | Missing            | -0.002050089 | 1383         |              |      |
| ALK.times.uln | >= | 5.462893197 |                    |    |              | Missing            | -0.000663559 | 1383         |              |      |
| PLT.resultn   | =  | Missing     |                    |    |              | Missing            | -0.002607274 | 1384         |              |      |
| PLT.resultn   | <  | 249.5       | Hemoglobin.resultn | =  | Missing      | Missing            | -0.000379607 | 1384         |              |      |
| PLT.resultn   | <  | 249.5       | Hemoglobin.resultn | <  | 14.15        | AST.resultn        | =            | Missing      | -0.001122219 | 1384 |
| PLT.resultn   | <  | 249.5       | Hemoglobin.resultn | <  | 14.15        | AST.resultn        | <            | 55           | -0.002965865 | 1384 |
| PLT.resultn   | <  | 249.5       | Hemoglobin.resultn | <  | 14.15        | AST.resultn        | >=           | 55           | 0            | 1384 |
| PLT.resultn   | <  | 249.5       | Hemoglobin.resultn | >= | 14.15        |                    | Missing      | -0.002961282 | 1384         |      |
| PLT.resultn   | >= | 249.5       |                    |    |              | Missing            | -0.002404106 | 1384         |              |      |
| PLT.resultn   | =  | Missing     |                    |    |              | Missing            | -0.003728993 | 1385         |              |      |
| PLT.resultn   | <  | 249.5       | TBILL.resultn      | =  | Missing      | Missing            | -0.002585923 | 1385         |              |      |
| PLT.resultn   | <  | 249.5       | TBILL.resultn      | <  | 2.35         | PLT.resultn        | =            | Missing      | -0.002784425 | 1385 |
| PLT.resultn   | <  | 249.5       | TBILL.resultn      | <  | 2.35         | PLT.resultn        | <            | 238          | -0.003536972 | 1385 |
| PLT.resultn   | <  | 249.5       | TBILL.resultn      | <  | 2.35         | PLT.resultn        | >=           | 238          | 0            | 1385 |
| PLT.resultn   | <  | 249.5       | TBILL.resultn      | >= | 2.35         |                    | Missing      | -0.001150605 | 1385         |      |
| PLT.resultn   | >= | 249.5       |                    |    |              | Missing            | -0.003688923 | 1385         |              |      |
| PLT.resultn   | =  | Missing     |                    |    |              | Missing            | -4.16E-05    | 1386         |              |      |
| PLT.resultn   | <  | 216         | TBILL.resultn      | =  | Missing      | Missing            | 0.001813019  | 1386         |              |      |
| PLT.resultn   | <  | 216         | TBILL.resultn      | <  | 1.65         | Hemoglobin.resultn | =            | Missing      | 0.001692688  | 1386 |
| PLT.resultn   | <  | 216         | TBILL.resultn      | <  | 1.65         | Hemoglobin.resultn | <            | 13.85        | 0.004739528  | 1386 |
| PLT.resultn   | <  | 216         | TBILL.resultn      | <  | 1.65         | Hemoglobin.resultn | >=           | 13.85        | 0            | 1386 |
| PLT.resultn   | <  | 216         | TBILL.resultn      | >= | 1.65         |                    | Missing      | 0.002118474  | 1386         |      |
| PLT.resultn   | >= | 216         |                    |    |              | Missing            | 0.000614137  | 1386         |              |      |
| ALB.resultn   | =  | Missing     |                    |    |              | Missing            | 1.67E-05     | 1387         |              |      |
| ALB.resultn   | <  | 3.105       |                    |    |              | Missing            | 0.002066707  | 1387         |              |      |
| ALB.resultn   | >= | 3.105       | PLT.resultn        | =  | Missing      | Missing            | 9.55E-07     | 1387         |              |      |
| ALB.resultn   | >= | 3.105       | PLT.resultn        | <  | 209.5        | Hemoglobin.resultn | =            | Missing      | 0.001243549  | 1387 |
| ALB.resultn   | >= | 3.105       | PLT.resultn        | <  | 209.5        | Hemoglobin.resultn | <            | 14.45        | 0.003606291  | 1387 |
| ALB.resultn   | >= | 3.105       | PLT.resultn        | <  | 209.5        | Hemoglobin.resultn | >=           | 14.45        | 0            | 1387 |
| ALB.resultn   | >= | 3.105       | PLT.resultn        | >= | 209.5        |                    | Missing      | 0.000392828  | 1387         |      |
| PLT.resultn   | =  | Missing     |                    |    |              | Missing            | -0.00264259  | 1388         |              |      |
| PLT.resultn   | <  | 185.5       |                    |    |              | Missing            | -0.000737498 | 1388         |              |      |
| PLT.resultn   | >= | 185.5       | Hemoglobin.resultn | =  | Missing      | TBILL.resultn      | =            | Missing      | -0.001959932 | 1388 |
| PLT.resultn   | >= | 185.5       | Hemoglobin.resultn | =  | Missing      | TBILL.resultn      | <            | 0.85         | -0.003769099 | 1388 |
| PLT.resultn   | >= | 185.5       | Hemoglobin.resultn | =  | Missing      | TBILL.resultn      | >=           | 0.85         | 0            | 1388 |
| PLT.resultn   | >= | 185.5       | Hemoglobin.resultn | <  | 13.85        |                    | Missing      | -0.002816432 | 1388         |      |
| PLT.resultn   | >= | 185.5       | Hemoglobin.resultn | >= | 13.85        |                    | Missing      | -0.003772187 | 1388         |      |
| TBILL.resultn | =  | Missing     |                    |    |              |                    | 0.001513864  | 1389         |              |      |
| TBILL.resultn | <  | 2.05        | Sodium.resultn     | =  | Missing      |                    | 0            | 1389         |              |      |
| TBILL.resultn | <  | 2.05        | Sodium.resultn     | <  | 142.5        |                    | 0.000795828  | 1389         |              |      |
| TBILL.resultn | <  | 2.05        | Sodium.resultn     | >= | 142.5        |                    | 0.003249637  | 1389         |              |      |
| TBILL.resultn | >= | 2.05        | Hemoglobin.resultn | =  | Missing      |                    | 0.000751578  | 1389         |              |      |
| TBILL.resultn | >= | 2.05        | Hemoglobin.resultn | <  | 12.75        |                    | 0.001579734  | 1389         |              |      |
| TBILL.resultn | >= | 2.05        | Hemoglobin.resultn | >= | 12.75        |                    | -1.29E-06    | 1389         |              |      |
| ALB.resultn   | =  | Missing     | TBILL.resultn      | =  | Missing      |                    | 0            | 1390         |              |      |
| ALB.resultn   | =  | Missing     | TBILL.resultn      | <  | 0.9          |                    | 0.003225519  | 1390         |              |      |
| ALB.resultn   | =  | Missing     | TBILL.resultn      | >= | 0.9          |                    | 2.01E-06     | 1390         |              |      |
| ALB.resultn   | <  | 2.915       |                    |    |              |                    | 0.002289805  | 1390         |              |      |
| ALB.resultn   | >= | 2.915       | TBILL.resultn      | =  | Missing      |                    | 0.000470906  | 1390         |              |      |
| ALB.resultn   | >= | 2.915       | TBILL.resultn      | <  | 2.45         |                    | 0.00033265   | 1390         |              |      |
| ALB.resultn   | >= | 2.915       | TBILL.resultn      | >= | 2.45         |                    | 0.002024249  | 1390         |              |      |
| psc.yrs.dur   | =  | Missing     |                    |    |              | Missing            | -0.003700951 | 1391         |              |      |
| psc.yrs.dur   | <  | 0.832306639 |                    |    |              | Missing            | -0.004218855 | 1391         |              |      |
| psc.yrs.dur   | >= | 0.832306639 | age.yrs            | =  | Missing      | Missing            | -0.002966021 | 1391         |              |      |

|               |    |                           |    |                           |    |             |              |      |
|---------------|----|---------------------------|----|---------------------------|----|-------------|--------------|------|
| psc.yrs.dur   | >= | 0.832306639 age.yrs       | <  | 53.56194387               |    | Missing     | -0.003445885 | 1391 |
| psc.yrs.dur   | >= | 0.832306639 age.yrs       | >= | 53.56194387 AST.resultn   | =  | Missing     | -0.001919045 | 1391 |
| psc.yrs.dur   | >= | 0.832306639 age.yrs       | >= | 53.56194387 AST.resultn   | <  | 52.5        | -0.004386388 | 1391 |
| psc.yrs.dur   | >= | 0.832306639 age.yrs       | >= | 53.56194387 AST.resultn   | >= | 52.5        | 0            | 1391 |
| psc.yrs.dur   | =  | Missing                   |    |                           |    | Missing     | -0.002448367 | 1392 |
| psc.yrs.dur   | <  | 1.397672827               |    |                           |    | Missing     | -0.002793236 | 1392 |
| psc.yrs.dur   | >= | 1.397672827 ALB.resultn   | =  | Missing                   |    | Missing     | -0.001809001 | 1392 |
| psc.yrs.dur   | >= | 1.397672827 ALB.resultn   | <  | 3.615 TBILL.resultn       | =  | Missing     | -0.00073187  | 1392 |
| psc.yrs.dur   | >= | 1.397672827 ALB.resultn   | <  | 3.615 TBILL.resultn       | <  | 1           | -0.0016833   | 1392 |
| psc.yrs.dur   | >= | 1.397672827 ALB.resultn   | <  | 3.615 TBILL.resultn       | >= | 1           | 0            | 1392 |
| psc.yrs.dur   | >= | 1.397672827 ALB.resultn   | >= | 3.615                     |    | Missing     | -0.002270629 | 1392 |
| TBILL.resultn | =  | Missing                   |    |                           |    |             | 4.42E-05     | 1393 |
| TBILL.resultn | <  | 1.95 Sodium.resultn       | =  | Missing                   |    |             | 0            | 1393 |
| TBILL.resultn | <  | 1.95 Sodium.resultn       | <  | 136.5                     |    |             | 0.003182231  | 1393 |
| TBILL.resultn | <  | 1.95 Sodium.resultn       | >= | 136.5                     |    |             | 0.000636068  | 1393 |
| TBILL.resultn | >= | 1.95 ALK.times.uln        | =  | Missing                   |    |             | 0.00154954   | 1393 |
| TBILL.resultn | >= | 1.95 ALK.times.uln        | <  | 4.342610778               |    |             | 0.001088881  | 1393 |
| TBILL.resultn | >= | 1.95 ALK.times.uln        | >= | 4.342610778               |    |             | 0.001856646  | 1393 |
| ALK.times.uln | =  | Missing                   |    |                           |    |             | -0.00315252  | 1394 |
| ALK.times.uln | <  | 5.462893197 ALB.resultn   | =  | Missing                   |    |             | 0            | 1394 |
| ALK.times.uln | <  | 5.462893197 ALB.resultn   | <  | 3.195                     |    |             | -0.003343596 | 1394 |
| ALK.times.uln | <  | 5.462893197 ALB.resultn   | >= | 3.195                     |    |             | -0.003202487 | 1394 |
| ALK.times.uln | >= | 5.462893197 ALK.times.uln | =  | Missing                   |    |             | -0.001717517 | 1394 |
| ALK.times.uln | >= | 5.462893197 ALK.times.uln | <  | 7.728571429               |    |             | -0.000162942 | 1394 |
| ALK.times.uln | >= | 5.462893197 ALK.times.uln | >= | 7.728571429               |    |             | -0.003272091 | 1394 |
| AST.resultn   | =  | Missing                   |    |                           |    | Missing     | -0.003544045 | 1395 |
| AST.resultn   | <  | 43                        |    |                           |    | Missing     | -0.003528142 | 1395 |
| AST.resultn   | >= | 43 age.yrs                | =  | Missing                   |    | Missing     | -0.002197082 | 1395 |
| AST.resultn   | >= | 43 age.yrs                | <  | 51.63175907               |    | Missing     | -0.002495608 | 1395 |
| AST.resultn   | >= | 43 age.yrs                | >= | 51.63175907 TBILL.resultn | =  | Missing     | -0.001410721 | 1395 |
| AST.resultn   | >= | 43 age.yrs                | >= | 51.63175907 TBILL.resultn | <  | 1.55        | -0.002015316 | 1395 |
| AST.resultn   | >= | 43 age.yrs                | >= | 51.63175907 TBILL.resultn | >= | 1.55        | 0            | 1395 |
| AST.resultn   | =  | Missing                   |    |                           |    | Missing     | -0.002969666 | 1396 |
| AST.resultn   | <  | 52.5                      |    |                           |    | Missing     | -0.003574383 | 1396 |
| AST.resultn   | >= | 52.5 age.yrs              | =  | Missing                   |    | Missing     | -0.002369865 | 1396 |
| AST.resultn   | >= | 52.5 age.yrs              | <  | 53.56194387               |    | Missing     | -0.002680248 | 1396 |
| AST.resultn   | >= | 52.5 age.yrs              | >= | 53.56194387 psc.yrs.dur   | =  | Missing     | -0.001487213 | 1396 |
| AST.resultn   | >= | 52.5 age.yrs              | >= | 53.56194387 psc.yrs.dur   | <  | 0.476386037 | -0.002974425 | 1396 |
| AST.resultn   | >= | 52.5 age.yrs              | >= | 53.56194387 psc.yrs.dur   | >= | 0.476386037 | 0            | 1396 |
| age.yrs       | =  | Missing                   |    |                           |    | Missing     | 0.000888984  | 1397 |
| age.yrs       | <  | 70.48049281 TBILL.resultn | =  | Missing                   |    | Missing     | 5.78E-06     | 1397 |
| age.yrs       | <  | 70.48049281 TBILL.resultn | <  | 2.55 TBILL.resultn        | =  | Missing     | 0.000773228  | 1397 |
| age.yrs       | <  | 70.48049281 TBILL.resultn | <  | 2.55 TBILL.resultn        | <  | 1.35        | 0.000893785  | 1397 |
| age.yrs       | <  | 70.48049281 TBILL.resultn | <  | 2.55 TBILL.resultn        | >= | 1.35        | 0            | 1397 |
| age.yrs       | <  | 70.48049281 TBILL.resultn | >= | 2.55                      |    | Missing     | 0.001617317  | 1397 |
| age.yrs       | >= | 70.48049281               |    |                           |    | Missing     | 0.003682884  | 1397 |
| psc.yrs.dur   | =  | Missing                   |    |                           |    | Missing     | -0.003038968 | 1398 |
| psc.yrs.dur   | <  | 1.961670089               |    |                           |    | Missing     | -0.003385998 | 1398 |
| psc.yrs.dur   | >= | 1.961670089 AST.resultn   | =  | Missing                   |    | Missing     | -0.002372829 | 1398 |
| psc.yrs.dur   | >= | 1.961670089 AST.resultn   | <  | 43.5                      |    | Missing     | -0.003838612 | 1398 |
| psc.yrs.dur   | >= | 1.961670089 AST.resultn   | >= | 43.5 age.yrs              | =  | Missing     | -0.001434727 | 1398 |
| psc.yrs.dur   | >= | 1.961670089 AST.resultn   | >= | 43.5 age.yrs              | <  | 53.35934292 | -0.001887799 | 1398 |
| psc.yrs.dur   | >= | 1.961670089 AST.resultn   | >= | 43.5 age.yrs              | >= | 53.35934292 | 0            | 1398 |
| ALK.times.uln | =  | Missing psc.yrs.dur       | =  | Missing                   |    |             | -0.000631441 | 1399 |
| ALK.times.uln | =  | Missing psc.yrs.dur       | <  | 0.839151266               |    |             | -0.001225738 | 1399 |
| ALK.times.uln | =  | Missing psc.yrs.dur       | >= | 0.839151266               |    |             | 0            | 1399 |
| ALK.times.uln | <  | 5.412513212 TBILL.resultn | =  | Missing                   |    |             | -0.00103909  | 1399 |
| ALK.times.uln | <  | 5.412513212 TBILL.resultn | <  | 1.65                      |    |             | -0.001231126 | 1399 |
| ALK.times.uln | <  | 5.412513212 TBILL.resultn | >= | 1.65                      |    |             | 0.000582544  | 1399 |
| ALK.times.uln | >= | 5.412513212               |    |                           |    |             | 0.000946511  | 1399 |
| ALB.resultn   | =  | Missing                   |    |                           |    | Missing     | -8.42E-05    | 1400 |
| ALB.resultn   | <  | 3.03                      |    |                           |    | Missing     | 0.001504642  | 1400 |

|               |    |             |               |    |             |                |              |             |              |      |
|---------------|----|-------------|---------------|----|-------------|----------------|--------------|-------------|--------------|------|
| ALB.resultn   | >= | 3.03        | TBILL.resultn | =  | Missing     | Missing        | -0.000306241 | 1400        |              |      |
| ALB.resultn   | >= | 3.03        | TBILL.resultn | <  | 2.65        | PLT.resultn    | =            | Missing     | 0            | 1400 |
| ALB.resultn   | >= | 3.03        | TBILL.resultn | <  | 2.65        | PLT.resultn    | <            | 185.5       | 0.002634968  | 1400 |
| ALB.resultn   | >= | 3.03        | TBILL.resultn | <  | 2.65        | PLT.resultn    | >=           | 185.5       | -0.00053072  | 1400 |
| ALB.resultn   | >= | 3.03        | TBILL.resultn | >= | 2.65        |                | Missing      |             | -0.000433803 | 1400 |
| TBILL.resultn | =  | Missing     |               |    |             |                |              |             | -0.000889938 | 1401 |
| TBILL.resultn | <  | 2.25        | age.yrs       | =  | Missing     |                |              |             | -0.002034058 | 1401 |
| TBILL.resultn | <  | 2.25        | age.yrs       | <  | 70.37645448 |                |              |             | -0.002132799 | 1401 |
| TBILL.resultn | <  | 2.25        | age.yrs       | >= | 70.37645448 |                |              |             | 0            | 1401 |
| TBILL.resultn | >= | 2.25        | psc.yrs.dur   | =  | Missing     |                |              |             | -0.000849543 | 1401 |
| TBILL.resultn | >= | 2.25        | psc.yrs.dur   | <  | 1.4770705   |                |              |             | -0.001400035 | 1401 |
| TBILL.resultn | >= | 2.25        | psc.yrs.dur   | >= | 1.4770705   |                |              |             | -0.000244002 | 1401 |
| TBILL.resultn | =  | Missing     |               |    |             |                |              |             | -0.001741818 | 1402 |
| TBILL.resultn | <  | 1.95        | age.yrs       | =  | Missing     |                |              |             | -0.00232712  | 1402 |
| TBILL.resultn | <  | 1.95        | age.yrs       | <  | 70.76659822 |                |              |             | -0.002440638 | 1402 |
| TBILL.resultn | <  | 1.95        | age.yrs       | >= | 70.76659822 |                |              |             | 0            | 1402 |
| TBILL.resultn | >= | 1.95        | PLT.resultn   | =  | Missing     |                |              |             | -0.000634691 | 1402 |
| TBILL.resultn | >= | 1.95        | PLT.resultn   | <  | 219         |                |              |             | 0.001157551  | 1402 |
| TBILL.resultn | >= | 1.95        | PLT.resultn   | >= | 219         |                |              |             | -0.001866857 | 1402 |
| psc.yrs.dur   | =  | Missing     |               |    |             |                | Missing      |             | 0.000143746  | 1403 |
| psc.yrs.dur   | <  | 2           |               |    |             |                | Missing      |             | -0.000116406 | 1403 |
| psc.yrs.dur   | >= | 2           | ALB.resultn   | =  | Missing     |                | Missing      |             | 0.000699379  | 1403 |
| psc.yrs.dur   | >= | 2           | ALB.resultn   | <  | 3.35        |                | Missing      |             | 0.00186286   | 1403 |
| psc.yrs.dur   | >= | 2           | ALB.resultn   | >= | 3.35        | psc.yrs.dur    | =            | Missing     | 0.000383858  | 1403 |
| psc.yrs.dur   | >= | 2           | ALB.resultn   | >= | 3.35        | psc.yrs.dur    | <            | 2.933607118 | 0.002058877  | 1403 |
| psc.yrs.dur   | >= | 2           | ALB.resultn   | >= | 3.35        | psc.yrs.dur    | >=           | 2.933607118 | 0            | 1403 |
| TBILL.resultn | =  | Missing     |               |    |             |                |              |             | -0.000430678 | 1404 |
| TBILL.resultn | <  | 2.05        | ALK.times.uln | =  | Missing     |                |              |             | 0            | 1404 |
| TBILL.resultn | <  | 2.05        | ALK.times.uln | <  | 2.815208295 |                |              |             | -0.000265283 | 1404 |
| TBILL.resultn | <  | 2.05        | ALK.times.uln | >= | 2.815208295 |                |              |             | 0.001330951  | 1404 |
| TBILL.resultn | >= | 2.05        | PLT.resultn   | =  | Missing     |                |              |             | 0.001416269  | 1404 |
| TBILL.resultn | >= | 2.05        | PLT.resultn   | <  | 238.5       |                |              |             | 0.002224268  | 1404 |
| TBILL.resultn | >= | 2.05        | PLT.resultn   | >= | 238.5       |                |              |             | 0.000794732  | 1404 |
| ALB.resultn   | =  | Missing     |               |    |             |                | Missing      |             | -0.00066658  | 1405 |
| ALB.resultn   | <  | 3.13        |               |    |             |                | Missing      |             | 0.00045185   | 1405 |
| ALB.resultn   | >= | 3.13        | TBILL.resultn | =  | Missing     |                | Missing      |             | -0.001046728 | 1405 |
| ALB.resultn   | >= | 3.13        | TBILL.resultn | <  | 2.25        | ALK.times.uln  | =            | Missing     | 0            | 1405 |
| ALB.resultn   | >= | 3.13        | TBILL.resultn | <  | 2.25        | ALK.times.uln  | <            | 4.091304348 | -0.001478546 | 1405 |
| ALB.resultn   | >= | 3.13        | TBILL.resultn | <  | 2.25        | ALK.times.uln  | >=           | 4.091304348 | -0.001507748 | 1405 |
| ALB.resultn   | >= | 3.13        | TBILL.resultn | >= | 2.25        |                | Missing      |             | 7.94E-05     | 1405 |
| ALB.resultn   | =  | Missing     |               |    |             |                | Missing      |             | -0.000204182 | 1406 |
| ALB.resultn   | <  | 2.95        |               |    |             |                | Missing      |             | 0.001221975  | 1406 |
| ALB.resultn   | >= | 2.95        | psc.yrs.dur   | =  | Missing     |                | Missing      |             | 6.16E-05     | 1406 |
| ALB.resultn   | >= | 2.95        | psc.yrs.dur   | <  | 7.823408624 |                | Missing      |             | -0.000172485 | 1406 |
| ALB.resultn   | >= | 2.95        | psc.yrs.dur   | >= | 7.823408624 | Sodium.resultn | =            | Missing     | 0.001554758  | 1406 |
| ALB.resultn   | >= | 2.95        | psc.yrs.dur   | >= | 7.823408624 | Sodium.resultn | <            | 138.5       | 0.003674883  | 1406 |
| ALB.resultn   | >= | 2.95        | psc.yrs.dur   | >= | 7.823408624 | Sodium.resultn | >=           | 138.5       | 0            | 1406 |
| psc.yrs.dur   | =  | Missing     |               |    |             |                | Missing      |             | -0.000426182 | 1407 |
| psc.yrs.dur   | <  | 6.410677618 |               |    |             |                | Missing      |             | -0.000597378 | 1407 |
| psc.yrs.dur   | >= | 6.410677618 | AST.resultn   | =  | Missing     |                | Missing      |             | 0.000463202  | 1407 |
| psc.yrs.dur   | >= | 6.410677618 | AST.resultn   | <  | 47.5        |                | Missing      |             | -0.001366434 | 1407 |
| psc.yrs.dur   | >= | 6.410677618 | AST.resultn   | >= | 47.5        | psc.yrs.dur    | =            | Missing     | 0.001414613  | 1407 |
| psc.yrs.dur   | >= | 6.410677618 | AST.resultn   | >= | 47.5        | psc.yrs.dur    | <            | 9.863107461 | 0.002947111  | 1407 |
| psc.yrs.dur   | >= | 6.410677618 | AST.resultn   | >= | 47.5        | psc.yrs.dur    | >=           | 9.863107461 | 0            | 1407 |
| ALK.times.uln | =  | Missing     | ALB.resultn   | =  | Missing     |                |              |             | -0.000297233 | 1408 |
| ALK.times.uln | =  | Missing     | ALB.resultn   | <  | 3.95        |                |              |             | 0.001695004  | 1408 |
| ALK.times.uln | =  | Missing     | ALB.resultn   | >= | 3.95        |                |              |             | 0.000106197  | 1408 |
| ALK.times.uln | <  | 6.02173913  | TBILL.resultn | =  | Missing     |                |              |             | 0.0003197    | 1408 |
| ALK.times.uln | <  | 6.02173913  | TBILL.resultn | <  | 1.35        |                |              |             | 0.000401543  | 1408 |
| ALK.times.uln | <  | 6.02173913  | TBILL.resultn | >= | 1.35        |                |              |             | 0            | 1408 |
| ALK.times.uln | >= | 6.02173913  |               |    |             |                |              |             | 0.001904576  | 1408 |
| ALK.times.uln | =  | Missing     | ALB.resultn   | =  | Missing     |                |              |             | -0.001137027 | 1409 |



|                |    |             |                    |    |             |                    |         |              |              |      |
|----------------|----|-------------|--------------------|----|-------------|--------------------|---------|--------------|--------------|------|
| ALK.times.uln  | =  | Missing     | ALB.resultn        | <  | 3.95        |                    |         | 0.001863736  | 1409         |      |
| ALK.times.uln  | =  | Missing     | ALB.resultn        | >= | 3.95        |                    |         | -0.000492499 | 1409         |      |
| ALK.times.uln  | <  | 6.115825908 |                    |    |             |                    |         | -0.000904254 | 1409         |      |
| ALK.times.uln  | >= | 6.115825908 | ALK.times.uln      | =  | Missing     |                    |         | 0.000729355  | 1409         |      |
| ALK.times.uln  | >= | 6.115825908 | ALK.times.uln      | <  | 7.868810472 |                    |         | 0.001531646  | 1409         |      |
| ALK.times.uln  | >= | 6.115825908 | ALK.times.uln      | >= | 7.868810472 |                    |         | 0            | 1409         |      |
| TBILL.resultn  | =  | Missing     |                    |    |             |                    | Missing | 0.002744416  | 1410         |      |
| TBILL.resultn  | <  | 1.55        |                    |    |             |                    | Missing | 0.000707481  | 1410         |      |
| TBILL.resultn  | >= | 1.55        | age.yrs            | =  | Missing     |                    | Missing | 0.001442537  | 1410         |      |
| TBILL.resultn  | >= | 1.55        | age.yrs            | <  | 51.64818617 | Hemoglobin.resultn | =       | Missing      | 5.82E-05     | 1410 |
| TBILL.resultn  | >= | 1.55        | age.yrs            | <  | 51.64818617 | Hemoglobin.resultn | <       | 13.75        | 0.000116339  | 1410 |
| TBILL.resultn  | >= | 1.55        | age.yrs            | <  | 51.64818617 | Hemoglobin.resultn | >=      | 13.75        | 0            | 1410 |
| TBILL.resultn  | >= | 1.55        | age.yrs            | >= | 51.64818617 |                    |         | Missing      | 0.004462974  | 1410 |
| ALB.resultn    | =  | Missing     |                    |    |             |                    | Missing | Missing      | -0.00093595  | 1411 |
| ALB.resultn    | <  | 2.95        |                    |    |             |                    | Missing | Missing      | 0.000524243  | 1411 |
| ALB.resultn    | >= | 2.95        | Sodium.resultn     | =  | Missing     | TBILL.resultn      | =       | Missing      | -0.001349009 | 1411 |
| ALB.resultn    | >= | 2.95        | Sodium.resultn     | =  | Missing     | TBILL.resultn      | <       | 1.25         | -0.001658618 | 1411 |
| ALB.resultn    | >= | 2.95        | Sodium.resultn     | =  | Missing     | TBILL.resultn      | >=      | 1.25         | 0            | 1411 |
| ALB.resultn    | >= | 2.95        | Sodium.resultn     | <  | 136.5       |                    |         | Missing      | 0.000415268  | 1411 |
| ALB.resultn    | >= | 2.95        | Sodium.resultn     | >= | 136.5       |                    |         | Missing      | -0.001051195 | 1411 |
| TBILL.resultn  | =  | Missing     |                    |    |             |                    |         | Missing      | -0.002675959 | 1412 |
| TBILL.resultn  | <  | 2.35        | Sodium.resultn     | =  | Missing     |                    |         | Missing      | -0.002706525 | 1412 |
| TBILL.resultn  | <  | 2.35        | Sodium.resultn     | <  | 139.5       |                    |         | Missing      | -0.002129229 | 1412 |
| TBILL.resultn  | <  | 2.35        | Sodium.resultn     | >= | 139.5       | AST.resultn        | =       | Missing      | -0.001509994 | 1412 |
| TBILL.resultn  | <  | 2.35        | Sodium.resultn     | >= | 139.5       | AST.resultn        | <       | 54.5         | -0.002696417 | 1412 |
| TBILL.resultn  | <  | 2.35        | Sodium.resultn     | >= | 139.5       | AST.resultn        | >=      | 54.5         | 0            | 1412 |
| TBILL.resultn  | >= | 2.35        |                    |    |             |                    |         | Missing      | -0.000777326 | 1412 |
| ALB.resultn    | =  | Missing     |                    |    |             |                    |         | Missing      | -0.00065985  | 1413 |
| ALB.resultn    | <  | 3.225       |                    |    |             |                    |         | Missing      | 0.000685054  | 1413 |
| ALB.resultn    | >= | 3.225       | TBILL.resultn      | =  | Missing     |                    |         | Missing      | -0.00046756  | 1413 |
| ALB.resultn    | >= | 3.225       | TBILL.resultn      | <  | 0.75        |                    |         | Missing      | -0.001160297 | 1413 |
| ALB.resultn    | >= | 3.225       | TBILL.resultn      | >= | 0.75        | Sodium.resultn     | =       | Missing      | 0            | 1413 |
| ALB.resultn    | >= | 3.225       | TBILL.resultn      | >= | 0.75        | Sodium.resultn     | <       | 137.5        | 0.002626857  | 1413 |
| ALB.resultn    | >= | 3.225       | TBILL.resultn      | >= | 0.75        | Sodium.resultn     | >=      | 137.5        | -0.000354215 | 1413 |
| TBILL.resultn  | =  | Missing     |                    |    |             |                    |         |              | 0.00192347   | 1414 |
| TBILL.resultn  | <  | 1.25        | ALK.times.uln      | =  | Missing     |                    |         |              | 0            | 1414 |
| TBILL.resultn  | <  | 1.25        | ALK.times.uln      | <  | 3.840983891 |                    |         |              | -1.31E-05    | 1414 |
| TBILL.resultn  | <  | 1.25        | ALK.times.uln      | >= | 3.840983891 |                    |         |              | 0.001509793  | 1414 |
| TBILL.resultn  | >= | 1.25        | Hemoglobin.resultn | =  | Missing     |                    |         |              | 0.003412247  | 1414 |
| TBILL.resultn  | >= | 1.25        | Hemoglobin.resultn | <  | 13.25       |                    |         |              | 0.001575055  | 1414 |
| TBILL.resultn  | >= | 1.25        | Hemoglobin.resultn | >= | 13.25       |                    |         |              | 9.61E-06     | 1414 |
| ALB.resultn    | =  | Missing     |                    |    |             |                    |         | Missing      | -0.001277597 | 1415 |
| ALB.resultn    | <  | 3.62        | PLT.resultn        | =  | Missing     |                    |         | Missing      | -0.00086864  | 1415 |
| ALB.resultn    | <  | 3.62        | PLT.resultn        | <  | 218         |                    |         | Missing      | 0.000519217  | 1415 |
| ALB.resultn    | <  | 3.62        | PLT.resultn        | >= | 218         | ALK.times.uln      | =       | Missing      | -0.001243737 | 1415 |
| ALB.resultn    | <  | 3.62        | PLT.resultn        | >= | 218         | ALK.times.uln      | <       | 5.689103147  | -0.001835993 | 1415 |
| ALB.resultn    | <  | 3.62        | PLT.resultn        | >= | 218         | ALK.times.uln      | >=      | 5.689103147  | 0            | 1415 |
| ALB.resultn    | >= | 3.62        |                    |    |             |                    |         | Missing      | -0.00129886  | 1415 |
| Sodium.resultn | =  | Missing     | TBILL.resultn      | =  | Missing     |                    |         |              | -0.000234504 | 1416 |
| Sodium.resultn | =  | Missing     | TBILL.resultn      | <  | 1.25        |                    |         |              | -0.000555046 | 1416 |
| Sodium.resultn | =  | Missing     | TBILL.resultn      | >= | 1.25        |                    |         |              | 0.001123084  | 1416 |
| Sodium.resultn | <  | 136.5       |                    |    |             |                    |         |              | 0.002079764  | 1416 |
| Sodium.resultn | >= | 136.5       | TBILL.resultn      | =  | Missing     |                    |         |              | 0.000541723  | 1416 |
| Sodium.resultn | >= | 136.5       | TBILL.resultn      | <  | 1.25        |                    |         |              | 0.000771544  | 1416 |
| Sodium.resultn | >= | 136.5       | TBILL.resultn      | >= | 1.25        |                    |         |              | 0            | 1416 |
| ALB.resultn    | =  | Missing     |                    |    |             |                    |         | Missing      | -0.002192957 | 1417 |
| ALB.resultn    | <  | 2.95        |                    |    |             |                    |         | Missing      | 0.000550216  | 1417 |
| ALB.resultn    | >= | 2.95        | TBILL.resultn      | =  | Missing     |                    |         | Missing      | -0.001727962 | 1417 |
| ALB.resultn    | >= | 2.95        | TBILL.resultn      | <  | 0.75        |                    |         | Missing      | -0.002198533 | 1417 |
| ALB.resultn    | >= | 2.95        | TBILL.resultn      | >= | 0.75        | ALK.times.uln      | =       | Missing      | 0            | 1417 |
| ALB.resultn    | >= | 2.95        | TBILL.resultn      | >= | 0.75        | ALK.times.uln      | <       | 3.320243495  | -0.002204878 | 1417 |
| ALB.resultn    | >= | 2.95        | TBILL.resultn      | >= | 0.75        | ALK.times.uln      | >=      | 3.320243495  | -0.000640222 | 1417 |

|                |    |                           |    |                            |         |         |              |      |
|----------------|----|---------------------------|----|----------------------------|---------|---------|--------------|------|
| ALB.resultn    | =  | Missing                   |    |                            | Missing |         | -5.94E-06    | 1418 |
| ALB.resultn    | <  | 2.915                     |    |                            | Missing |         | 0.002372839  | 1418 |
| ALB.resultn    | >= | 2.915 TBILI.resultn       | =  | Missing                    | Missing |         | 0.000566339  | 1418 |
| ALB.resultn    | >= | 2.915 TBILI.resultn       | <  | 0.75                       | Missing |         | -2.64E-05    | 1418 |
| ALB.resultn    | >= | 2.915 TBILI.resultn       | >= | 0.75 Sodium.resultn        | =       | Missing | 0            | 1418 |
| ALB.resultn    | >= | 2.915 TBILI.resultn       | >= | 0.75 Sodium.resultn        | <       | 137.5   | 0.00375094   | 1418 |
| ALB.resultn    | >= | 2.915 TBILI.resultn       | >= | 0.75 Sodium.resultn        | >=      | 137.5   | 0.001304357  | 1418 |
| ALK.times.uln  | =  | Missing                   |    |                            | Missing |         | -0.001680221 | 1419 |
| ALK.times.uln  | <  | 2.85059761                |    |                            | Missing |         | -0.0015394   | 1419 |
| ALK.times.uln  | >= | 2.85059761 PLT.resultn    | =  | Missing                    | Missing |         | -0.000375893 | 1419 |
| ALK.times.uln  | >= | 2.85059761 PLT.resultn    | <  | 209.5                      | Missing |         | 0.003215018  | 1419 |
| ALK.times.uln  | >= | 2.85059761 PLT.resultn    | >= | 209.5 PLT.resultn          | =       | Missing | -0.00127362  | 1419 |
| ALK.times.uln  | >= | 2.85059761 PLT.resultn    | >= | 209.5 PLT.resultn          | <       | 434.5   | -0.001648215 | 1419 |
| ALK.times.uln  | >= | 2.85059761 PLT.resultn    | >= | 209.5 PLT.resultn          | >=      | 434.5   | 0            | 1419 |
| ALB.resultn    | =  | Missing                   |    |                            | Missing |         | -0.000751416 | 1420 |
| ALB.resultn    | <  | 2.825                     |    |                            | Missing |         | 0.00165076   | 1420 |
| ALB.resultn    | >= | 2.825 psc.yrs.dur         | =  | Missing                    | Missing |         | 0.000102889  | 1420 |
| ALB.resultn    | >= | 2.825 psc.yrs.dur         | <  | 6.783025325                | Missing |         | -9.41E-05    | 1420 |
| ALB.resultn    | >= | 2.825 psc.yrs.dur         | >= | 6.783025325 Sodium.resultn | =       | Missing | 0.001180282  | 1420 |
| ALB.resultn    | >= | 2.825 psc.yrs.dur         | >= | 6.783025325 Sodium.resultn | <       | 140.5   | 0.001835994  | 1420 |
| ALB.resultn    | >= | 2.825 psc.yrs.dur         | >= | 6.783025325 Sodium.resultn | >=      | 140.5   | 0            | 1420 |
| age.yrs        | =  | Missing                   |    |                            | Missing |         | -0.000661639 | 1421 |
| age.yrs        | <  | 54.21218344               |    |                            | Missing |         | -0.000965344 | 1421 |
| age.yrs        | >= | 54.21218344 AST.resultn   | =  | Missing                    | Missing |         | 0.000278867  | 1421 |
| age.yrs        | >= | 54.21218344 AST.resultn   | <  | 51.5                       | Missing |         | -0.001542615 | 1421 |
| age.yrs        | >= | 54.21218344 AST.resultn   | >= | 51.5 AST.resultn           | =       | Missing | 0.001713975  | 1421 |
| age.yrs        | >= | 54.21218344 AST.resultn   | >= | 51.5 AST.resultn           | <       | 72      | 0.004040084  | 1421 |
| age.yrs        | >= | 54.21218344 AST.resultn   | >= | 51.5 AST.resultn           | >=      | 72      | 0            | 1421 |
| ALK.times.uln  | =  | Missing psc.yrs.dur       | =  | Missing                    |         |         | -0.001477837 | 1422 |
| ALK.times.uln  | =  | Missing psc.yrs.dur       | <  | 1.874058864                |         |         | -0.002425169 | 1422 |
| ALK.times.uln  | =  | Missing psc.yrs.dur       | >= | 1.874058864                |         |         | 0            | 1422 |
| ALK.times.uln  | <  | 5.446215139 TBILI.resultn | =  | Missing                    |         |         | -0.002467612 | 1422 |
| ALK.times.uln  | <  | 5.446215139 TBILI.resultn | <  | 2.55                       |         |         | -0.002583736 | 1422 |
| ALK.times.uln  | <  | 5.446215139 TBILI.resultn | >= | 2.55                       |         |         | -0.000586412 | 1422 |
| ALK.times.uln  | >= | 5.446215139               |    |                            |         |         | -0.000855186 | 1422 |
| ALK.times.uln  | =  | Missing                   |    |                            | Missing |         | -0.00200619  | 1423 |
| ALK.times.uln  | <  | 2.822501299               |    |                            | Missing |         | -0.002597102 | 1423 |
| ALK.times.uln  | >= | 2.822501299 PLT.resultn   | =  | Missing                    | Missing |         | -0.000626046 | 1423 |
| ALK.times.uln  | >= | 2.822501299 PLT.resultn   | <  | 249.5 TBILI.resultn        | =       | Missing | 0.000592554  | 1423 |
| ALK.times.uln  | >= | 2.822501299 PLT.resultn   | <  | 249.5 TBILI.resultn        | <       | 1.45    | 0.001185109  | 1423 |
| ALK.times.uln  | >= | 2.822501299 PLT.resultn   | <  | 249.5 TBILI.resultn        | >=      | 1.45    | 0            | 1423 |
| ALK.times.uln  | >= | 2.822501299 PLT.resultn   | >= | 249.5                      | Missing |         | -0.001299482 | 1423 |
| Sodium.resultn | =  | Missing                   |    |                            | Missing |         | -0.001270891 | 1424 |
| Sodium.resultn | <  | 141.5 ALK.times.uln       | =  | Missing                    | Missing |         | 0.000139475  | 1424 |
| Sodium.resultn | <  | 141.5 ALK.times.uln       | <  | 2.795652174                | Missing |         | -0.001118185 | 1424 |
| Sodium.resultn | <  | 141.5 ALK.times.uln       | >= | 2.795652174 PLT.resultn    | =       | Missing | 0.001135621  | 1424 |
| Sodium.resultn | <  | 141.5 ALK.times.uln       | >= | 2.795652174 PLT.resultn    | <       | 268     | 0.002882731  | 1424 |
| Sodium.resultn | <  | 141.5 ALK.times.uln       | >= | 2.795652174 PLT.resultn    | >=      | 268     | 0            | 1424 |
| Sodium.resultn | >= | 141.5                     |    |                            | Missing |         | -0.001299224 | 1424 |
| TBILI.resultn  | =  | Missing                   |    |                            |         |         | 0.000836814  | 1425 |
| TBILI.resultn  | <  | 1.95 ALK.times.uln        | =  | Missing                    |         |         | 0            | 1425 |
| TBILI.resultn  | <  | 1.95 ALK.times.uln        | <  | 2.822501299                |         |         | -8.67E-05    | 1425 |
| TBILI.resultn  | <  | 1.95 ALK.times.uln        | >= | 2.822501299                |         |         | 0.00113413   | 1425 |
| TBILI.resultn  | >= | 1.95 psc.yrs.dur          | =  | Missing                    |         |         | 0.001213988  | 1425 |
| TBILI.resultn  | >= | 1.95 psc.yrs.dur          | <  | 0.704996578                |         |         | 0.000217906  | 1425 |
| TBILI.resultn  | >= | 1.95 psc.yrs.dur          | >= | 0.704996578                |         |         | 0.002625104  | 1425 |
| ALB.resultn    | =  | Missing                   |    |                            | Missing |         | 7.78E-05     | 1426 |
| ALB.resultn    | <  | 2.95                      |    |                            | Missing |         | 0.001857934  | 1426 |
| ALB.resultn    | >= | 2.95 psc.yrs.dur          | =  | Missing                    | Missing |         | -8.02E-05    | 1426 |
| ALB.resultn    | >= | 2.95 psc.yrs.dur          | <  | 6.262833676                | Missing |         | -0.0002791   | 1426 |
| ALB.resultn    | >= | 2.95 psc.yrs.dur          | >= | 6.262833676 Sodium.resultn | =       | Missing | 0.001045057  | 1426 |
| ALB.resultn    | >= | 2.95 psc.yrs.dur          | >= | 6.262833676 Sodium.resultn | <       | 140.5   | 0.002020443  | 1426 |

|                    |    |                           |    |                            |    |         |              |      |
|--------------------|----|---------------------------|----|----------------------------|----|---------|--------------|------|
| ALB.resultn        | >= | 2.95 psc.yrs.dur          | >= | 6.262833676 Sodium.resultn | >= | 140.5   | 0            | 1426 |
| age.yrs            | =  | Missing                   |    |                            |    | Missing | -0.00312279  | 1427 |
| age.yrs            | <  | 54.39972621               |    |                            |    | Missing | -0.003305429 | 1427 |
| age.yrs            | >= | 54.39972621 PLT.resultn   | =  | Missing                    |    | Missing | -0.002519155 | 1427 |
| age.yrs            | >= | 54.39972621 PLT.resultn   | <  | 251.5 AST.resultn          | =  | Missing | -0.001547777 | 1427 |
| age.yrs            | >= | 54.39972621 PLT.resultn   | <  | 251.5 AST.resultn          | <  | 51.5    | -0.003869442 | 1427 |
| age.yrs            | >= | 54.39972621 PLT.resultn   | <  | 251.5 AST.resultn          | >= | 51.5    | 0            | 1427 |
| age.yrs            | >= | 54.39972621 PLT.resultn   | >= | 251.5                      |    | Missing | -0.003843761 | 1427 |
| ALB.resultn        | =  | Missing                   |    |                            |    | Missing | -0.002486484 | 1428 |
| ALB.resultn        | <  | 2.95                      |    |                            |    | Missing | -0.000899399 | 1428 |
| ALB.resultn        | >= | 2.95 TBILL.resultn        | =  | Missing                    |    | Missing | -0.002819181 | 1428 |
| ALB.resultn        | >= | 2.95 TBILL.resultn        | <  | 1.15                       |    | Missing | -0.003155993 | 1428 |
| ALB.resultn        | >= | 2.95 TBILL.resultn        | >= | 1.15 Hemoglobin.resultn    | =  | Missing | 0            | 1428 |
| ALB.resultn        | >= | 2.95 TBILL.resultn        | >= | 1.15 Hemoglobin.resultn    | <  | 12.25   | -0.002657244 | 1428 |
| ALB.resultn        | >= | 2.95 TBILL.resultn        | >= | 1.15 Hemoglobin.resultn    | >= | 12.25   | -0.002486395 | 1428 |
| Hemoglobin.resultn | =  | Missing TBILL.resultn     | =  | Missing                    |    |         | -8.19E-05    | 1429 |
| Hemoglobin.resultn | =  | Missing TBILL.resultn     | <  | 1.65                       |    |         | -0.000525108 | 1429 |
| Hemoglobin.resultn | =  | Missing TBILL.resultn     | >= | 1.65                       |    |         | 0.002214946  | 1429 |
| Hemoglobin.resultn | <  | 12.25                     |    |                            |    |         | -0.000442282 | 1429 |
| Hemoglobin.resultn | >= | 12.25 psc.yrs.dur         | =  | Missing                    |    |         | 0.000440277  | 1429 |
| Hemoglobin.resultn | >= | 12.25 psc.yrs.dur         | <  | 0.045174538                |    |         | 0.004256008  | 1429 |
| Hemoglobin.resultn | >= | 12.25 psc.yrs.dur         | >= | 0.045174538                |    |         | 0            | 1429 |
| psc.yrs.dur        | =  | Missing                   |    |                            |    |         | 0.000661836  | 1430 |
| psc.yrs.dur        | <  | 7.404517454 AST.resultn   | =  | Missing                    |    |         | 0.000554346  | 1430 |
| psc.yrs.dur        | <  | 7.404517454 AST.resultn   | <  | 72.5                       |    |         | 0.000959107  | 1430 |
| psc.yrs.dur        | <  | 7.404517454 AST.resultn   | >= | 72.5                       |    |         | 0            | 1430 |
| psc.yrs.dur        | >= | 7.404517454 TBILL.resultn | =  | Missing                    |    |         | 0.001464421  | 1430 |
| psc.yrs.dur        | >= | 7.404517454 TBILL.resultn | <  | 0.95                       |    |         | -0.000442459 | 1430 |
| psc.yrs.dur        | >= | 7.404517454 TBILL.resultn | >= | 0.95                       |    |         | 0.00301376   | 1430 |
| Hemoglobin.resultn | =  | Missing TBILL.resultn     | =  | Missing                    |    |         | -0.000484684 | 1431 |
| Hemoglobin.resultn | =  | Missing TBILL.resultn     | <  | 1.15                       |    |         | 0.00052546   | 1431 |
| Hemoglobin.resultn | =  | Missing TBILL.resultn     | >= | 1.15                       |    |         | 0.003575151  | 1431 |
| Hemoglobin.resultn | <  | 11.05                     |    |                            |    |         | 0.001626648  | 1431 |
| Hemoglobin.resultn | >= | 11.05 ALK.times.uln       | =  | Missing                    |    |         | 0            | 1431 |
| Hemoglobin.resultn | >= | 11.05 ALK.times.uln       | <  | 5.462893197                |    |         | -0.000345976 | 1431 |
| Hemoglobin.resultn | >= | 11.05 ALK.times.uln       | >= | 5.462893197                |    |         | 0.001316168  | 1431 |
| TBILL.resultn      | =  | Missing                   |    |                            |    |         | -4.32E-06    | 1432 |
| TBILL.resultn      | <  | 1.65 Sodium.resultn       | =  | Missing                    |    |         | 0            | 1432 |
| TBILL.resultn      | <  | 1.65 Sodium.resultn       | <  | 142.5                      |    |         | 0.000304126  | 1432 |
| TBILL.resultn      | <  | 1.65 Sodium.resultn       | >= | 142.5                      |    |         | 0.003097171  | 1432 |
| TBILL.resultn      | >= | 1.65 Hemoglobin.resultn   | =  | Missing                    |    |         | 0.002041861  | 1432 |
| TBILL.resultn      | >= | 1.65 Hemoglobin.resultn   | <  | 12.75                      |    |         | 0.002610844  | 1432 |
| TBILL.resultn      | >= | 1.65 Hemoglobin.resultn   | >= | 12.75                      |    |         | 0.001615124  | 1432 |
| ALB.resultn        | =  | Missing                   |    |                            |    | Missing | -3.48E-06    | 1433 |
| ALB.resultn        | <  | 3.105                     |    |                            |    | Missing | 0.000869975  | 1433 |
| ALB.resultn        | >= | 3.105 TBILL.resultn       | =  | Missing                    |    | Missing | -0.000291746 | 1433 |
| ALB.resultn        | >= | 3.105 TBILL.resultn       | <  | 0.75                       |    | Missing | -0.000927499 | 1433 |
| ALB.resultn        | >= | 3.105 TBILL.resultn       | >= | 0.75 Sodium.resultn        | =  | Missing | 0            | 1433 |
| ALB.resultn        | >= | 3.105 TBILL.resultn       | >= | 0.75 Sodium.resultn        | <  | 138.5   | 0.001676771  | 1433 |
| ALB.resultn        | >= | 3.105 TBILL.resultn       | >= | 0.75 Sodium.resultn        | >= | 138.5   | -0.000279323 | 1433 |
| TBILL.resultn      | =  | Missing                   |    |                            |    |         | -0.000357252 | 1434 |
| TBILL.resultn      | <  | 2.05 ALK.times.uln        | =  | Missing                    |    |         | 0            | 1434 |
| TBILL.resultn      | <  | 2.05 ALK.times.uln        | <  | 5.963877551                |    |         | 0.000102225  | 1434 |
| TBILL.resultn      | <  | 2.05 ALK.times.uln        | >= | 5.963877551                |    |         | 0.001941481  | 1434 |
| TBILL.resultn      | >= | 2.05 PLT.resultn          | =  | Missing                    |    |         | 0.001503177  | 1434 |
| TBILL.resultn      | >= | 2.05 PLT.resultn          | <  | 225.5                      |    |         | 0.002367354  | 1434 |
| TBILL.resultn      | >= | 2.05 PLT.resultn          | >= | 225.5                      |    |         | 0.000783029  | 1434 |
| age.yrs            | =  | Missing                   |    |                            |    | Missing | -0.002936438 | 1435 |
| age.yrs            | <  | 49.03353867               |    |                            |    | Missing | -0.00329288  | 1435 |
| age.yrs            | >= | 49.03353867 ALB.resultn   | =  | Missing                    |    | Missing | -0.002329728 | 1435 |
| age.yrs            | >= | 49.03353867 ALB.resultn   | <  | 3.645 TBILL.resultn        | =  | Missing | -0.001780877 | 1435 |
| age.yrs            | >= | 49.03353867 ALB.resultn   | <  | 3.645 TBILL.resultn        | <  | 1       | -0.003561754 | 1435 |

|                |    |             |               |    |             |                    |         |             |              |      |
|----------------|----|-------------|---------------|----|-------------|--------------------|---------|-------------|--------------|------|
| age.yrs        | >= | 49.03353867 | ALB.resultn   | <  | 3.645       | TBILI.resultn      | >=      | 1           | 0            | 1435 |
| age.yrs        | >= | 49.03353867 | ALB.resultn   | >= | 3.645       |                    | Missing |             | -0.002530103 | 1435 |
| ALB.resultn    | =  | Missing     |               |    |             |                    | Missing |             | -0.002109407 | 1436 |
| ALB.resultn    | <  | 3.245       |               |    |             |                    | Missing |             | -0.000398033 | 1436 |
| ALB.resultn    | >= | 3.245       | TBILI.resultn | =  | Missing     |                    | Missing |             | -0.002181063 | 1436 |
| ALB.resultn    | >= | 3.245       | TBILI.resultn | <  | 0.75        |                    | Missing |             | -0.002718051 | 1436 |
| ALB.resultn    | >= | 3.245       | TBILI.resultn | >= | 0.75        | psc.yrs.dur        | =       | Missing     | -0.001612176 | 1436 |
| ALB.resultn    | >= | 3.245       | TBILI.resultn | >= | 0.75        | psc.yrs.dur        | <       | 7.817932923 | -0.00180922  | 1436 |
| ALB.resultn    | >= | 3.245       | TBILI.resultn | >= | 0.75        | psc.yrs.dur        | >=      | 7.817932923 | 0            | 1436 |
| ALB.resultn    | =  | Missing     |               |    |             |                    | Missing |             | -0.001018658 | 1437 |
| ALB.resultn    | <  | 2.85        |               |    |             |                    | Missing |             | 0.001059051  | 1437 |
| ALB.resultn    | >= | 2.85        | TBILI.resultn | =  | Missing     |                    | Missing |             | -0.000429871 | 1437 |
| ALB.resultn    | >= | 2.85        | TBILI.resultn | <  | 0.85        |                    | Missing |             | -0.001028379 | 1437 |
| ALB.resultn    | >= | 2.85        | TBILI.resultn | >= | 0.85        | Sodium.resultn     | =       | Missing     | 0            | 1437 |
| ALB.resultn    | >= | 2.85        | TBILI.resultn | >= | 0.85        | Sodium.resultn     | <       | 138.5       | 0.001397616  | 1437 |
| ALB.resultn    | >= | 2.85        | TBILI.resultn | >= | 0.85        | Sodium.resultn     | >=      | 138.5       | 1.49E-05     | 1437 |
| TBILI.resultn  | =  | Missing     |               |    |             |                    |         |             | -0.001201241 | 1438 |
| TBILI.resultn  | <  | 1.95        | psc.yrs.dur   | =  | Missing     |                    |         |             | -0.001328599 | 1438 |
| TBILI.resultn  | <  | 1.95        | psc.yrs.dur   | <  | 7.177275838 |                    |         |             | -0.001496422 | 1438 |
| TBILI.resultn  | <  | 1.95        | psc.yrs.dur   | >= | 7.177275838 |                    |         |             | 0            | 1438 |
| TBILI.resultn  | >= | 1.95        | psc.yrs.dur   | =  | Missing     |                    |         |             | -0.000272093 | 1438 |
| TBILI.resultn  | >= | 1.95        | psc.yrs.dur   | <  | 0.670773443 |                    |         |             | -0.000735717 | 1438 |
| TBILI.resultn  | >= | 1.95        | psc.yrs.dur   | >= | 0.670773443 |                    |         |             | 0.00011426   | 1438 |
| TBILI.resultn  | =  | Missing     |               |    |             |                    |         |             | -0.002693298 | 1439 |
| TBILI.resultn  | <  | 1.9         | age.yrs       | =  | Missing     |                    |         |             | -0.002007862 | 1439 |
| TBILI.resultn  | <  | 1.9         | age.yrs       | <  | 69.70978782 |                    |         |             | -0.002139029 | 1439 |
| TBILI.resultn  | <  | 1.9         | age.yrs       | >= | 69.70978782 |                    |         |             | 0            | 1439 |
| TBILI.resultn  | >= | 1.9         | age.yrs       | =  | Missing     |                    |         |             | -0.001384051 | 1439 |
| TBILI.resultn  | >= | 1.9         | age.yrs       | <  | 51.10746064 |                    |         |             | -0.001642805 | 1439 |
| TBILI.resultn  | >= | 1.9         | age.yrs       | >= | 51.10746064 |                    |         |             | -0.000892417 | 1439 |
| age.yrs        | =  | Missing     |               |    |             |                    | Missing |             | -0.00361267  | 1440 |
| age.yrs        | <  | 53.46475017 |               |    |             |                    | Missing |             | -0.003770391 | 1440 |
| age.yrs        | >= | 53.46475017 | psc.yrs.dur   | =  | Missing     |                    | Missing |             | -0.003144435 | 1440 |
| age.yrs        | >= | 53.46475017 | psc.yrs.dur   | <  | 0.76659822  |                    | Missing |             | -0.0037101   | 1440 |
| age.yrs        | >= | 53.46475017 | psc.yrs.dur   | >= | 0.76659822  | AST.resultn        | =       | Missing     | -0.002417151 | 1440 |
| age.yrs        | >= | 53.46475017 | psc.yrs.dur   | >= | 0.76659822  | AST.resultn        | <       | 54.5        | -0.004350872 | 1440 |
| age.yrs        | >= | 53.46475017 | psc.yrs.dur   | >= | 0.76659822  | AST.resultn        | >=      | 54.5        | 0            | 1440 |
| AST.resultn    | =  | Missing     |               |    |             |                    | Missing |             | -0.000938122 | 1441 |
| AST.resultn    | <  | 213.5       | AST.resultn   | =  | Missing     |                    | Missing |             | 3.44E-05     | 1441 |
| AST.resultn    | <  | 213.5       | AST.resultn   | <  | 57.5        |                    | Missing |             | -0.00092816  | 1441 |
| AST.resultn    | <  | 213.5       | AST.resultn   | >= | 57.5        | AST.resultn        | =       | Missing     | 0.001085171  | 1441 |
| AST.resultn    | <  | 213.5       | AST.resultn   | >= | 57.5        | AST.resultn        | <       | 65.5        | 0.007885577  | 1441 |
| AST.resultn    | <  | 213.5       | AST.resultn   | >= | 57.5        | AST.resultn        | >=      | 65.5        | 0            | 1441 |
| AST.resultn    | >= | 213.5       |               |    |             |                    | Missing |             | 0.002638172  | 1441 |
| Sodium.resultn | =  | Missing     |               |    |             |                    | Missing |             | 0.000802653  | 1442 |
| Sodium.resultn | <  | 141.5       | ALK.times.uln | =  | Missing     | ALB.resultn        | =       | Missing     | 0.000974509  | 1442 |
| Sodium.resultn | <  | 141.5       | ALK.times.uln | =  | Missing     | ALB.resultn        | <       | 3.95        | 0.002480568  | 1442 |
| Sodium.resultn | <  | 141.5       | ALK.times.uln | =  | Missing     | ALB.resultn        | >=      | 3.95        | 0            | 1442 |
| Sodium.resultn | <  | 141.5       | ALK.times.uln | <  | 5.462893197 |                    | Missing |             | 0.000915908  | 1442 |
| Sodium.resultn | <  | 141.5       | ALK.times.uln | >= | 5.462893197 |                    | Missing |             | 0.002330376  | 1442 |
| Sodium.resultn | >= | 141.5       |               |    |             |                    | Missing |             | 0.000384927  | 1442 |
| PLT.resultn    | =  | Missing     |               |    |             |                    | Missing |             | -0.000708915 | 1443 |
| PLT.resultn    | <  | 249.5       | ALB.resultn   | =  | Missing     |                    | Missing |             | -0.000250233 | 1443 |
| PLT.resultn    | <  | 249.5       | ALB.resultn   | <  | 3.75        |                    | Missing |             | 0.001601391  | 1443 |
| PLT.resultn    | <  | 249.5       | ALB.resultn   | >= | 3.75        | Hemoglobin.resultn | =       | Missing     | 0            | 1443 |
| PLT.resultn    | <  | 249.5       | ALB.resultn   | >= | 3.75        | Hemoglobin.resultn | <       | 13.05       | 0.000924471  | 1443 |
| PLT.resultn    | <  | 249.5       | ALB.resultn   | >= | 3.75        | Hemoglobin.resultn | >=      | 13.05       | -0.001337926 | 1443 |
| PLT.resultn    | >= | 249.5       |               |    |             |                    | Missing |             | -0.001370257 | 1443 |
| TBILI.resultn  | =  | Missing     |               |    |             |                    |         |             | -0.001200452 | 1444 |
| TBILI.resultn  | <  | 1.31        | age.yrs       | =  | Missing     |                    |         |             | -0.001908581 | 1444 |
| TBILI.resultn  | <  | 1.31        | age.yrs       | <  | 64.65571526 |                    |         |             | -0.002100505 | 1444 |
| TBILI.resultn  | <  | 1.31        | age.yrs       | >= | 64.65571526 |                    |         |             | 0            | 1444 |

|                    |    |             |                    |    |             |               |         |              |              |      |
|--------------------|----|-------------|--------------------|----|-------------|---------------|---------|--------------|--------------|------|
| TBILL.resultn      | >= | 1.31        | ALB.resultn        | =  | Missing     |               |         | -0.000745292 | 1444         |      |
| TBILL.resultn      | >= | 1.31        | ALB.resultn        | <  | 3.735       |               |         | 0.000384402  | 1444         |      |
| TBILL.resultn      | >= | 1.31        | ALB.resultn        | >= | 3.735       |               |         | -0.001515538 | 1444         |      |
| Sodium.resultn     | =  | Missing     |                    |    |             |               | Missing | -0.003863318 | 1445         |      |
| Sodium.resultn     | <  | 138.5       | age.yrs            | =  | Missing     |               | Missing | -0.002690413 | 1445         |      |
| Sodium.resultn     | <  | 138.5       | age.yrs            | <  | 49.14852841 |               | Missing | -0.003633812 | 1445         |      |
| Sodium.resultn     | <  | 138.5       | age.yrs            | >= | 49.14852841 | psc.yrs.dur   | =       | Missing      | -0.001446842 | 1445 |
| Sodium.resultn     | <  | 138.5       | age.yrs            | >= | 49.14852841 | psc.yrs.dur   | <       | 1.416837782  | -0.002893684 | 1445 |
| Sodium.resultn     | <  | 138.5       | age.yrs            | >= | 49.14852841 | psc.yrs.dur   | >=      | 1.416837782  | 0            | 1445 |
| Sodium.resultn     | >= | 138.5       |                    |    |             |               | Missing | -0.003978691 | 1445         |      |
| Hemoglobin.resultn | =  | Missing     | ALB.resultn        | =  | Missing     |               |         | -0.001884942 | 1446         |      |
| Hemoglobin.resultn | =  | Missing     | ALB.resultn        | <  | 3.65        |               |         | 0.00109511   | 1446         |      |
| Hemoglobin.resultn | =  | Missing     | ALB.resultn        | >= | 3.65        |               |         | -0.001457949 | 1446         |      |
| Hemoglobin.resultn | <  | 13.85       | ALK.times.uln      | =  | Missing     |               |         | -0.000372852 | 1446         |      |
| Hemoglobin.resultn | <  | 13.85       | ALK.times.uln      | <  | 4.910399219 |               |         | -0.000451942 | 1446         |      |
| Hemoglobin.resultn | <  | 13.85       | ALK.times.uln      | >= | 4.910399219 |               |         | 0            | 1446         |      |
| Hemoglobin.resultn | >= | 13.85       |                    |    |             |               |         | -0.001575734 | 1446         |      |
| ALB.resultn        | =  | Missing     |                    |    |             |               | Missing | -0.001477891 | 1447         |      |
| ALB.resultn        | <  | 2.825       |                    |    |             |               | Missing | -0.00014838  | 1447         |      |
| ALB.resultn        | >= | 2.825       | ALB.resultn        | =  | Missing     |               | Missing | -0.00129753  | 1447         |      |
| ALB.resultn        | >= | 2.825       | ALB.resultn        | <  | 3.225       |               | Missing | -0.001913987 | 1447         |      |
| ALB.resultn        | >= | 2.825       | ALB.resultn        | >= | 3.225       | age.yrs       | =       | Missing      | -0.001264929 | 1447 |
| ALB.resultn        | >= | 2.825       | ALB.resultn        | >= | 3.225       | age.yrs       | <       | 51.63175907  | -0.001742419 | 1447 |
| ALB.resultn        | >= | 2.825       | ALB.resultn        | >= | 3.225       | age.yrs       | >=      | 51.63175907  | 0            | 1447 |
| ALB.resultn        | =  | Missing     |                    |    |             |               | Missing | -0.001312507 | 1448         |      |
| ALB.resultn        | <  | 2.915       |                    |    |             |               | Missing | -0.000101725 | 1448         |      |
| ALB.resultn        | >= | 2.915       | ALB.resultn        | =  | Missing     |               | Missing | -0.001314105 | 1448         |      |
| ALB.resultn        | >= | 2.915       | ALB.resultn        | <  | 3.155       |               | Missing | -0.001729125 | 1448         |      |
| ALB.resultn        | >= | 2.915       | ALB.resultn        | >= | 3.155       | ALK.times.uln | =       | Missing      | 0            | 1448 |
| ALB.resultn        | >= | 2.915       | ALB.resultn        | >= | 3.155       | ALK.times.uln | <       | 2.822501299  | -0.002066358 | 1448 |
| ALB.resultn        | >= | 2.915       | ALB.resultn        | >= | 3.155       | ALK.times.uln | >=      | 2.822501299  | -0.000479133 | 1448 |
| Sodium.resultn     | =  | Missing     |                    |    |             |               | Missing | 0.0009139    | 1449         |      |
| Sodium.resultn     | <  | 136.5       |                    |    |             |               | Missing | 0.002810842  | 1449         |      |
| Sodium.resultn     | >= | 136.5       | TBILL.resultn      | =  | Missing     |               | Missing | 0.000657485  | 1449         |      |
| Sodium.resultn     | >= | 136.5       | TBILL.resultn      | <  | 0.95        | ALB.resultn   | =       | Missing      | 0.000623659  | 1449 |
| Sodium.resultn     | >= | 136.5       | TBILL.resultn      | <  | 0.95        | ALB.resultn   | <       | 3.845        | 0.002045603  | 1449 |
| Sodium.resultn     | >= | 136.5       | TBILL.resultn      | <  | 0.95        | ALB.resultn   | >=      | 3.845        | 0            | 1449 |
| Sodium.resultn     | >= | 136.5       | TBILL.resultn      | >= | 0.95        |               | Missing | 0.000702048  | 1449         |      |
| ALB.resultn        | =  | Missing     |                    |    |             |               | Missing | -0.001697585 | 1450         |      |
| ALB.resultn        | <  | 2.825       |                    |    |             |               | Missing | -0.000169693 | 1450         |      |
| ALB.resultn        | >= | 2.825       | psc.yrs.dur        | =  | Missing     |               | Missing | -0.001586574 | 1450         |      |
| ALB.resultn        | >= | 2.825       | psc.yrs.dur        | <  | 1.360711841 |               | Missing | -0.001962193 | 1450         |      |
| ALB.resultn        | >= | 2.825       | psc.yrs.dur        | >= | 1.360711841 | age.yrs       | =       | Missing      | -0.000951268 | 1450 |
| ALB.resultn        | >= | 2.825       | psc.yrs.dur        | >= | 1.360711841 | age.yrs       | <       | 49.41957563  | -0.001879334 | 1450 |
| ALB.resultn        | >= | 2.825       | psc.yrs.dur        | >= | 1.360711841 | age.yrs       | >=      | 49.41957563  | 0            | 1450 |
| psc.yrs.dur        | =  | Missing     |                    |    |             |               |         | 0.000320459  | 1451         |      |
| psc.yrs.dur        | <  | 6.440793977 | Sodium.resultn     | =  | Missing     |               |         | 0            | 1451         |      |
| psc.yrs.dur        | <  | 6.440793977 | Sodium.resultn     | <  | 138.5       |               |         | 0.001024484  | 1451         |      |
| psc.yrs.dur        | <  | 6.440793977 | Sodium.resultn     | >= | 138.5       |               |         | 2.30E-08     | 1451         |      |
| psc.yrs.dur        | >= | 6.440793977 | AST.resultn        | =  | Missing     |               |         | 0.001008807  | 1451         |      |
| psc.yrs.dur        | >= | 6.440793977 | AST.resultn        | <  | 43          |               |         | -0.000408255 | 1451         |      |
| psc.yrs.dur        | >= | 6.440793977 | AST.resultn        | >= | 43          |               |         | 0.002898224  | 1451         |      |
| psc.yrs.dur        | =  | Missing     |                    |    |             |               |         | -0.000405383 | 1452         |      |
| psc.yrs.dur        | <  | 0.004106776 | Hemoglobin.resultn | =  | Missing     |               |         | 0.001889233  | 1452         |      |
| psc.yrs.dur        | <  | 0.004106776 | Hemoglobin.resultn | <  | 13.9        |               |         | 0.004213366  | 1452         |      |
| psc.yrs.dur        | <  | 0.004106776 | Hemoglobin.resultn | >= | 13.9        |               |         | -0.001364552 | 1452         |      |
| psc.yrs.dur        | >= | 0.004106776 | Hemoglobin.resultn | =  | Missing     |               |         | 0            | 1452         |      |
| psc.yrs.dur        | >= | 0.004106776 | Hemoglobin.resultn | <  | 10.25       |               |         | 0.000446959  | 1452         |      |
| psc.yrs.dur        | >= | 0.004106776 | Hemoglobin.resultn | >= | 10.25       |               |         | -0.001108878 | 1452         |      |
| ALB.resultn        | =  | Missing     |                    |    |             |               | Missing | -0.002451663 | 1453         |      |
| ALB.resultn        | <  | 2.95        |                    |    |             |               | Missing | -0.001608392 | 1453         |      |
| ALB.resultn        | >= | 2.95        | psc.yrs.dur        | =  | Missing     |               | Missing | -0.003056422 | 1453         |      |

|                    |    |                            |    |                         |    |             |              |      |
|--------------------|----|----------------------------|----|-------------------------|----|-------------|--------------|------|
| ALB.resultn        | >= | 2.95 psc.yrs.dur           | <  | 6.783025325             |    | Missing     | -0.003177629 | 1453 |
| ALB.resultn        | >= | 2.95 psc.yrs.dur           | >= | 6.783025325 AST.resultn | =  | Missing     | -0.002125549 | 1453 |
| ALB.resultn        | >= | 2.95 psc.yrs.dur           | >= | 6.783025325 AST.resultn | <  | 54.5        | -0.003542581 | 1453 |
| ALB.resultn        | >= | 2.95 psc.yrs.dur           | >= | 6.783025325 AST.resultn | >= | 54.5        | 0            | 1453 |
| age.yrs            | =  | Missing                    |    |                         |    | Missing     | -0.000743958 | 1454 |
| age.yrs            | <  | 69.71800137 Sodium.resultn | =  | Missing                 |    | Missing     | -0.001527453 | 1454 |
| age.yrs            | <  | 69.71800137 Sodium.resultn | <  | 138.5 ALK.times.uln     | =  | Missing     | 0            | 1454 |
| age.yrs            | <  | 69.71800137 Sodium.resultn | <  | 138.5 ALK.times.uln     | <  | 2.776684566 | -0.001508339 | 1454 |
| age.yrs            | <  | 69.71800137 Sodium.resultn | <  | 138.5 ALK.times.uln     | >= | 2.776684566 | 0.001178522  | 1454 |
| age.yrs            | <  | 69.71800137 Sodium.resultn | >= | 138.5                   |    | Missing     | -0.000783629 | 1454 |
| age.yrs            | >= | 69.71800137                |    |                         |    | Missing     | 0.002917169  | 1454 |
| ALK.times.uln      | =  | Missing ALB.resultn        | =  | Missing                 |    |             | 0.000364599  | 1455 |
| ALK.times.uln      | =  | Missing ALB.resultn        | <  | 3.55                    |    |             | 0.001640695  | 1455 |
| ALK.times.uln      | =  | Missing ALB.resultn        | >= | 3.55                    |    |             | 0            | 1455 |
| ALK.times.uln      | <  | 5.462893197                |    |                         |    |             | 0.00017287   | 1455 |
| ALK.times.uln      | >= | 5.462893197 AST.resultn    | =  | Missing                 |    |             | 0.001468636  | 1455 |
| ALK.times.uln      | >= | 5.462893197 AST.resultn    | <  | 112.5                   |    |             | 0.002539147  | 1455 |
| ALK.times.uln      | >= | 5.462893197 AST.resultn    | >= | 112.5                   |    |             | 0.000495444  | 1455 |
| psc.yrs.dur        | =  | Missing                    |    |                         |    |             | -0.000664256 | 1456 |
| psc.yrs.dur        | <  | 1.916495551 ALB.resultn    | =  | Missing                 |    |             | 0            | 1456 |
| psc.yrs.dur        | <  | 1.916495551 ALB.resultn    | <  | 3.08                    |    |             | -0.001736406 | 1456 |
| psc.yrs.dur        | <  | 1.916495551 ALB.resultn    | >= | 3.08                    |    |             | -0.001306549 | 1456 |
| psc.yrs.dur        | >= | 1.916495551 Sodium.resultn | =  | Missing                 |    |             | -0.000100031 | 1456 |
| psc.yrs.dur        | >= | 1.916495551 Sodium.resultn | <  | 138.5                   |    |             | 0.004895373  | 1456 |
| psc.yrs.dur        | >= | 1.916495551 Sodium.resultn | >= | 138.5                   |    |             | -0.000831928 | 1456 |
| ALK.times.uln      | =  | Missing TBILL.resultn      | =  | Missing                 |    |             | -0.001911496 | 1457 |
| ALK.times.uln      | =  | Missing TBILL.resultn      | <  | 1.31                    |    |             | -0.002336273 | 1457 |
| ALK.times.uln      | =  | Missing TBILL.resultn      | >= | 1.31                    |    |             | 0            | 1457 |
| ALK.times.uln      | <  | 4.964143426                |    |                         |    |             | -0.002939159 | 1457 |
| ALK.times.uln      | >= | 4.964143426 TBILL.resultn  | =  | Missing                 |    |             | -0.001000322 | 1457 |
| ALK.times.uln      | >= | 4.964143426 TBILL.resultn  | <  | 1.75                    |    |             | 3.24E-05     | 1457 |
| ALK.times.uln      | >= | 4.964143426 TBILL.resultn  | >= | 1.75                    |    |             | -0.002119139 | 1457 |
| ALK.times.uln      | =  | Missing psc.yrs.dur        | =  | Missing                 |    |             | -0.000706899 | 1458 |
| ALK.times.uln      | =  | Missing psc.yrs.dur        | <  | 0.428473648             |    |             | -0.001535678 | 1458 |
| ALK.times.uln      | =  | Missing psc.yrs.dur        | >= | 0.428473648             |    |             | 0            | 1458 |
| ALK.times.uln      | <  | 5.446215139                |    |                         |    |             | -0.001255386 | 1458 |
| ALK.times.uln      | >= | 5.446215139 psc.yrs.dur    | =  | Missing                 |    |             | 0.000689842  | 1458 |
| ALK.times.uln      | >= | 5.446215139 psc.yrs.dur    | <  | 1.538672142             |    |             | 0.002066962  | 1458 |
| ALK.times.uln      | >= | 5.446215139 psc.yrs.dur    | >= | 1.538672142             |    |             | -0.000687278 | 1458 |
| Sodium.resultn     | =  | Missing TBILL.resultn      | =  | Missing                 |    |             | -0.001779592 | 1459 |
| Sodium.resultn     | =  | Missing TBILL.resultn      | <  | 1.25                    |    |             | -0.001774822 | 1459 |
| Sodium.resultn     | =  | Missing TBILL.resultn      | >= | 1.25                    |    |             | 0.000917564  | 1459 |
| Sodium.resultn     | <  | 136.5                      |    |                         |    |             | 0.000520531  | 1459 |
| Sodium.resultn     | >= | 136.5 Hemoglobin.resultn   | =  | Missing                 |    |             | 0            | 1459 |
| Sodium.resultn     | >= | 136.5 Hemoglobin.resultn   | <  | 15.35                   |    |             | -0.001580394 | 1459 |
| Sodium.resultn     | >= | 136.5 Hemoglobin.resultn   | >= | 15.35                   |    |             | -6.65E-05    | 1459 |
| ALB.resultn        | =  | Missing                    |    |                         |    | Missing     | -0.001726542 | 1460 |
| ALB.resultn        | <  | 2.915                      |    |                         |    | Missing     | 0.000499069  | 1460 |
| ALB.resultn        | >= | 2.915 ALB.resultn          | =  | Missing                 |    | Missing     | -0.000844163 | 1460 |
| ALB.resultn        | >= | 2.915 ALB.resultn          | <  | 3.13                    |    | Missing     | -0.001156703 | 1460 |
| ALB.resultn        | >= | 2.915 ALB.resultn          | >= | 3.13 AST.resultn        | =  | Missing     | -0.000827227 | 1460 |
| ALB.resultn        | >= | 2.915 ALB.resultn          | >= | 3.13 AST.resultn        | <  | 47.5        | -0.001732007 | 1460 |
| ALB.resultn        | >= | 2.915 ALB.resultn          | >= | 3.13 AST.resultn        | >= | 47.5        | 0            | 1460 |
| Hemoglobin.resultn | =  | Missing TBILL.resultn      | =  | Missing                 |    |             | -0.00087742  | 1461 |
| Hemoglobin.resultn | =  | Missing TBILL.resultn      | <  | 0.95                    |    |             | -0.001747275 | 1461 |
| Hemoglobin.resultn | =  | Missing TBILL.resultn      | >= | 0.95                    |    |             | 0.00086229   | 1461 |
| Hemoglobin.resultn | <  | 11.75                      |    |                         |    |             | -0.001982959 | 1461 |
| Hemoglobin.resultn | >= | 11.75 ALK.times.uln        | =  | Missing                 |    |             | -0.001584201 | 1461 |
| Hemoglobin.resultn | >= | 11.75 ALK.times.uln        | <  | 5.857962963             |    |             | -0.001733052 | 1461 |
| Hemoglobin.resultn | >= | 11.75 ALK.times.uln        | >= | 5.857962963             |    |             | 0            | 1461 |
| Sodium.resultn     | =  | Missing                    |    |                         |    | Missing     | -0.002007487 | 1462 |
| Sodium.resultn     | <  | 136.5                      |    |                         |    | Missing     | -0.000887096 | 1462 |

|                    |    |              |                    |    |                         |               |         |             |              |      |
|--------------------|----|--------------|--------------------|----|-------------------------|---------------|---------|-------------|--------------|------|
| Sodium.resultn     | >= | 136.5        | Hemoglobin.resultn | =  | Missing                 | AST.resultn   | =       | Missing     | -0.001786711 | 1462 |
| Sodium.resultn     | >= | 136.5        | Hemoglobin.resultn | =  | Missing                 | AST.resultn   | <       | 52.5        | -0.002837718 | 1462 |
| Sodium.resultn     | >= | 136.5        | Hemoglobin.resultn | =  | Missing                 | AST.resultn   | >=      | 52.5        | 0            | 1462 |
| Sodium.resultn     | >= | 136.5        | Hemoglobin.resultn | <  | 12.15                   |               | Missing |             | -0.002619183 | 1462 |
| Sodium.resultn     | >= | 136.5        | Hemoglobin.resultn | >= | 12.15                   |               | Missing |             | -0.001851379 | 1462 |
| Sodium.resultn     | =  | Missing      |                    |    |                         |               | Missing |             | -0.00501313  | 1463 |
| Sodium.resultn     | <  | 136.5        |                    |    |                         |               | Missing |             | -0.003791616 | 1463 |
| Sodium.resultn     | >= | 136.5        | TBILL.resultn      | =  | Missing                 |               | Missing |             | -0.004867033 | 1463 |
| Sodium.resultn     | >= | 136.5        | TBILL.resultn      | <  | 2.55 age.yrs            |               | =       | Missing     | -0.004808154 | 1463 |
| Sodium.resultn     | >= | 136.5        | TBILL.resultn      | <  | 2.55 age.yrs            |               | <       | 64.89253936 | -0.005280384 | 1463 |
| Sodium.resultn     | >= | 136.5        | TBILL.resultn      | <  | 2.55 age.yrs            |               | >=      | 64.89253936 | 0            | 1463 |
| Sodium.resultn     | >= | 136.5        | TBILL.resultn      | >= | 2.55                    |               | Missing |             | -0.005384328 | 1463 |
| TBILL.resultn      | =  | Missing      |                    |    |                         |               |         |             | -0.003635073 | 1464 |
| TBILL.resultn      | <  | 1.65 age.yrs |                    | =  | Missing                 |               |         |             | -0.002921186 | 1464 |
| TBILL.resultn      | <  | 1.65 age.yrs |                    | <  | 69.84257358             |               |         |             | -0.00308513  | 1464 |
| TBILL.resultn      | <  | 1.65 age.yrs |                    | >= | 69.84257358             |               |         |             | 0            | 1464 |
| TBILL.resultn      | >= | 1.65         | PLT.resultn        | =  | Missing                 |               |         |             | -0.002099933 | 1464 |
| TBILL.resultn      | >= | 1.65         | PLT.resultn        | <  | 225.5                   |               |         |             | -0.000560031 | 1464 |
| TBILL.resultn      | >= | 1.65         | PLT.resultn        | >= | 225.5                   |               |         |             | -0.00283322  | 1464 |
| ALB.resultn        | =  | Missing      |                    |    |                         |               | Missing |             | -0.002927888 | 1465 |
| ALB.resultn        | <  | 3.05         |                    |    |                         |               | Missing |             | -0.000810813 | 1465 |
| ALB.resultn        | >= | 3.05 age.yrs |                    | =  | Missing                 |               | Missing |             | -0.002709271 | 1465 |
| ALB.resultn        | >= | 3.05 age.yrs |                    | <  | 55.77138946             |               | Missing |             | -0.002968994 | 1465 |
| ALB.resultn        | >= | 3.05 age.yrs |                    | >= | 55.77138946 psc.yrs.dur |               | =       | Missing     | -0.00198112  | 1465 |
| ALB.resultn        | >= | 3.05 age.yrs |                    | >= | 55.77138946 psc.yrs.dur |               | <       | 6.110882957 | -0.002465393 | 1465 |
| ALB.resultn        | >= | 3.05 age.yrs |                    | >= | 55.77138946 psc.yrs.dur |               | >=      | 6.110882957 | 0            | 1465 |
| PLT.resultn        | =  | Missing      |                    |    |                         |               | Missing |             | -0.000189469 | 1466 |
| PLT.resultn        | <  | 170          |                    |    |                         |               | Missing |             | 0.002896787  | 1466 |
| PLT.resultn        | >= | 170          | psc.yrs.dur        | =  | Missing                 |               | Missing |             | 0.000175917  | 1466 |
| PLT.resultn        | >= | 170          | psc.yrs.dur        | <  | 0.016427105             | AST.resultn   | =       | Missing     | 0.001600804  | 1466 |
| PLT.resultn        | >= | 170          | psc.yrs.dur        | <  | 0.016427105             | AST.resultn   | <       | 64.5        | 0.00386861   | 1466 |
| PLT.resultn        | >= | 170          | psc.yrs.dur        | <  | 0.016427105             | AST.resultn   | >=      | 64.5        | 0            | 1466 |
| PLT.resultn        | >= | 170          | psc.yrs.dur        | >= | 0.016427105             |               | Missing |             | -6.95E-05    | 1466 |
| ALB.resultn        | =  | Missing      |                    |    |                         |               | Missing |             | -0.001238013 | 1467 |
| ALB.resultn        | <  | 2.95         |                    |    |                         |               | Missing |             | -6.67E-05    | 1467 |
| ALB.resultn        | >= | 2.95         | ALB.resultn        | =  | Missing                 |               | Missing |             | -0.001949154 | 1467 |
| ALB.resultn        | >= | 2.95         | ALB.resultn        | <  | 3.18                    |               | Missing |             | -0.002319791 | 1467 |
| ALB.resultn        | >= | 2.95         | ALB.resultn        | >= | 3.18                    | TBILL.resultn | =       | Missing     | -0.001931504 | 1467 |
| ALB.resultn        | >= | 2.95         | ALB.resultn        | >= | 3.18                    | TBILL.resultn | <       | 1.65        | -0.002135896 | 1467 |
| ALB.resultn        | >= | 2.95         | ALB.resultn        | >= | 3.18                    | TBILL.resultn | >=      | 1.65        | 0            | 1467 |
| Hemoglobin.resultn | =  | Missing      | TBILL.resultn      | =  | Missing                 |               |         |             | -0.000783377 | 1468 |
| Hemoglobin.resultn | =  | Missing      | TBILL.resultn      | <  | 1.15                    |               |         |             | -0.001437484 | 1468 |
| Hemoglobin.resultn | =  | Missing      | TBILL.resultn      | >= | 1.15                    |               |         |             | 0.000933654  | 1468 |
| Hemoglobin.resultn | <  | 13.75        | ALK.times.uln      | =  | Missing                 |               |         |             | -0.000837536 | 1468 |
| Hemoglobin.resultn | <  | 13.75        | ALK.times.uln      | <  | 2.843304606             |               |         |             | -0.001329133 | 1468 |
| Hemoglobin.resultn | <  | 13.75        | ALK.times.uln      | >= | 2.843304606             |               |         |             | 0            | 1468 |
| Hemoglobin.resultn | >= | 13.75        |                    |    |                         |               |         |             | -0.00198595  | 1468 |
| ALB.resultn        | =  | Missing      |                    |    |                         |               | Missing |             | -0.004889527 | 1469 |
| ALB.resultn        | <  | 2.825        |                    |    |                         |               | Missing |             | -0.003643518 | 1469 |
| ALB.resultn        | >= | 2.825        | psc.yrs.dur        | =  | Missing                 |               | Missing |             | -0.004432598 | 1469 |
| ALB.resultn        | >= | 2.825        | psc.yrs.dur        | <  | 6.410677618             |               | Missing |             | -0.004723775 | 1469 |
| ALB.resultn        | >= | 2.825        | psc.yrs.dur        | >= | 6.410677618             | AST.resultn   | =       | Missing     | -0.002487952 | 1469 |
| ALB.resultn        | >= | 2.825        | psc.yrs.dur        | >= | 6.410677618             | AST.resultn   | <       | 47.5        | -0.005358666 | 1469 |
| ALB.resultn        | >= | 2.825        | psc.yrs.dur        | >= | 6.410677618             | AST.resultn   | >=      | 47.5        | 0            | 1469 |
| age.yrs            | =  | Missing      |                    |    |                         |               | Missing |             | 2.36E-05     | 1470 |
| age.yrs            | <  | 69.84257358  | TBILL.resultn      | =  | Missing                 |               | Missing |             | 0.001217978  | 1470 |
| age.yrs            | <  | 69.84257358  | TBILL.resultn      | <  | 2.05                    |               | Missing |             | -0.000337176 | 1470 |
| age.yrs            | <  | 69.84257358  | TBILL.resultn      | >= | 2.05                    | TBILL.resultn | =       | Missing     | 0.000612796  | 1470 |
| age.yrs            | <  | 69.84257358  | TBILL.resultn      | >= | 2.05                    | TBILL.resultn | <       | 2.95        | 0.001286872  | 1470 |
| age.yrs            | <  | 69.84257358  | TBILL.resultn      | >= | 2.05                    | TBILL.resultn | >=      | 2.95        | 0            | 1470 |
| age.yrs            | >= | 69.84257358  |                    |    |                         |               | Missing |             | 0.003918072  | 1470 |
| ALB.resultn        | =  | Missing      |                    |    |                         |               | Missing |             | -6.34E-05    | 1471 |

|                |    |                          |             |                         |         |              |              |      |
|----------------|----|--------------------------|-------------|-------------------------|---------|--------------|--------------|------|
| ALB.resultn    | <  | 3.615 Hemoglobin.resultn | =           | Missing                 | Missing | 0.000823557  | 1471         |      |
| ALB.resultn    | <  | 3.615 Hemoglobin.resultn | <           | 12.7                    | Missing | -0.000157478 | 1471         |      |
| ALB.resultn    | <  | 3.615 Hemoglobin.resultn | >=          | 12.7 Hemoglobin.resultn | =       | Missing      | 0.00172284   | 1471 |
| ALB.resultn    | <  | 3.615 Hemoglobin.resultn | >=          | 12.7 Hemoglobin.resultn | <       | 13.65        | 0.004134816  | 1471 |
| ALB.resultn    | <  | 3.615 Hemoglobin.resultn | >=          | 12.7 Hemoglobin.resultn | >=      | 13.65        | 0            | 1471 |
| ALB.resultn    | >= | 3.615                    |             |                         | Missing | -0.000250945 | 1471         |      |
| PLT.resultn    | =  | Missing                  |             |                         |         | -0.000577815 | 1472         |      |
| PLT.resultn    | <  | 216 ALK.times.uln        | =           | Missing                 |         | 0.001372845  | 1472         |      |
| PLT.resultn    | <  | 216 ALK.times.uln        | <           | 2.458431872             |         | -0.000570248 | 1472         |      |
| PLT.resultn    | <  | 216 ALK.times.uln        | >=          | 2.458431872             |         | 0.005470222  | 1472         |      |
| PLT.resultn    | >= | 216 TBILL.resultn        | =           | Missing                 |         | 0.000404938  | 1472         |      |
| PLT.resultn    | >= | 216 TBILL.resultn        | <           | 1.15                    |         | 0.000563393  | 1472         |      |
| PLT.resultn    | >= | 216 TBILL.resultn        | >=          | 1.15                    |         | 0            | 1472         |      |
| psc.yrs.dur    | =  | Missing                  |             |                         |         | 0.000897277  | 1473         |      |
| psc.yrs.dur    | <  | 7.404517454 AST.resultn  | =           | Missing                 |         | 0.000759801  | 1473         |      |
| psc.yrs.dur    | <  | 7.404517454 AST.resultn  | <           | 133                     |         | 0.000852263  | 1473         |      |
| psc.yrs.dur    | <  | 7.404517454 AST.resultn  | >=          | 133                     |         | 0            | 1473         |      |
| psc.yrs.dur    | >= | 7.404517454 psc.yrs.dur  | =           | Missing                 |         | 0.001817956  | 1473         |      |
| psc.yrs.dur    | >= | 7.404517454 psc.yrs.dur  | <           | 9.863107461             |         | 0.004121724  | 1473         |      |
| psc.yrs.dur    | >= | 7.404517454 psc.yrs.dur  | >=          | 9.863107461             |         | 0.000666073  | 1473         |      |
| ALB.resultn    | =  | Missing                  |             |                         | Missing | -0.002483219 | 1474         |      |
| ALB.resultn    | <  | 2.95                     |             |                         | Missing | -0.001285263 | 1474         |      |
| ALB.resultn    | >= | 2.95 psc.yrs.dur         | =           | Missing                 | Missing | -0.003030364 | 1474         |      |
| ALB.resultn    | >= | 2.95 psc.yrs.dur         | <           | 6.410677618             |         | -0.003223787 | 1474         |      |
| ALB.resultn    | >= | 2.95 psc.yrs.dur         | >=          | 6.410677618 AST.resultn | =       | Missing      | -0.001951881 | 1474 |
| ALB.resultn    | >= | 2.95 psc.yrs.dur         | >=          | 6.410677618 AST.resultn | <       | 95           | -0.002800525 | 1474 |
| ALB.resultn    | >= | 2.95 psc.yrs.dur         | >=          | 6.410677618 AST.resultn | >=      | 95           | 0            | 1474 |
| ALK.times.uln  | =  | Missing                  | ALB.resultn | =                       | Missing | 0            | 1475         |      |
| ALK.times.uln  | =  | Missing                  | ALB.resultn | <                       | 3.95    | 0.002209864  | 1475         |      |
| ALK.times.uln  | =  | Missing                  | ALB.resultn | >=                      | 3.95    | 2.87E-05     | 1475         |      |
| ALK.times.uln  | <  | 6.02                     |             |                         |         | 0.000668296  | 1475         |      |
| ALK.times.uln  | >= | 6.02 ALK.times.uln       | =           | Missing                 |         | 0.001883674  | 1475         |      |
| ALK.times.uln  | >= | 6.02 ALK.times.uln       | <           | 7.728571429             |         | 0.002783637  | 1475         |      |
| ALK.times.uln  | >= | 6.02 ALK.times.uln       | >=          | 7.728571429             |         | 0.00098371   | 1475         |      |
| age.yrs        | =  | Missing                  |             |                         | Missing | -0.001871673 | 1476         |      |
| age.yrs        | <  | 54.39972621              |             |                         | Missing | -0.001962599 | 1476         |      |
| age.yrs        | >= | 54.39972621 AST.resultn  | =           | Missing                 | Missing | -0.001564406 | 1476         |      |
| age.yrs        | >= | 54.39972621 AST.resultn  | <           | 51.5                    |         | Missing      | -0.002681366 | 1476 |
| age.yrs        | >= | 54.39972621 AST.resultn  | >=          | 51.5 TBILL.resultn      | =       | Missing      | -0.000524477 | 1476 |
| age.yrs        | >= | 54.39972621 AST.resultn  | >=          | 51.5 TBILL.resultn      | <       | 0.95         | -0.000815853 | 1476 |
| age.yrs        | >= | 54.39972621 AST.resultn  | >=          | 51.5 TBILL.resultn      | >=      | 0.95         | 0            | 1476 |
| Sodium.resultn | =  | Missing                  |             |                         | Missing | -0.000606193 | 1477         |      |
| Sodium.resultn | <  | 136.5                    |             |                         | Missing | 0.000971597  | 1477         |      |
| Sodium.resultn | >= | 136.5 PLT.resultn        | =           | Missing                 | Missing | -0.000288054 | 1477         |      |
| Sodium.resultn | >= | 136.5 PLT.resultn        | <           | 270 ALK.times.uln       | =       | Missing      | 0            | 1477 |
| Sodium.resultn | >= | 136.5 PLT.resultn        | <           | 270 ALK.times.uln       | <       | 4.342610778  | -0.000362961 | 1477 |
| Sodium.resultn | >= | 136.5 PLT.resultn        | <           | 270 ALK.times.uln       | >=      | 4.342610778  | 0.002337132  | 1477 |
| Sodium.resultn | >= | 136.5 PLT.resultn        | >=          | 270                     |         | Missing      | -0.000893734 | 1477 |
| ALB.resultn    | =  | Missing                  |             |                         | Missing | -0.00093793  | 1478         |      |
| ALB.resultn    | <  | 2.85                     |             |                         | Missing | 0.000697829  | 1478         |      |
| ALB.resultn    | >= | 2.85 TBILL.resultn       | =           | Missing                 | Missing | -0.00107469  | 1478         |      |
| ALB.resultn    | >= | 2.85 TBILL.resultn       | <           | 2.65 TBILL.resultn      | =       | Missing      | -0.001063643 | 1478 |
| ALB.resultn    | >= | 2.85 TBILL.resultn       | <           | 2.65 TBILL.resultn      | <       | 0.85         | -0.001705205 | 1478 |
| ALB.resultn    | >= | 2.85 TBILL.resultn       | <           | 2.65 TBILL.resultn      | >=      | 0.85         | 0            | 1478 |
| ALB.resultn    | >= | 2.85 TBILL.resultn       | >=          | 2.65                    | Missing | -0.001214162 | 1478         |      |
| ALB.resultn    | =  | Missing                  |             |                         |         | -0.001678602 | 1479         |      |
| ALB.resultn    | <  | 3.225 psc.yrs.dur        | =           | Missing                 |         | 0.000419497  | 1479         |      |
| ALB.resultn    | <  | 3.225 psc.yrs.dur        | <           | 0.988364134             |         | -0.000246482 | 1479         |      |
| ALB.resultn    | <  | 3.225 psc.yrs.dur        | >=          | 0.988364134             |         | 0.001085476  | 1479         |      |
| ALB.resultn    | >= | 3.225 age.yrs            | =           | Missing                 |         | -0.001084828 | 1479         |      |
| ALB.resultn    | >= | 3.225 age.yrs            | <           | 49.41957563             |         | -0.001700103 | 1479         |      |
| ALB.resultn    | >= | 3.225 age.yrs            | >=          | 49.41957563             |         | 0            | 1479         |      |



|                    |    |            |                    |    |             |               |         |              |              |      |
|--------------------|----|------------|--------------------|----|-------------|---------------|---------|--------------|--------------|------|
| Hemoglobin.resultn | =  | Missing    | ALB.resultn        | =  | Missing     |               |         | -0.000389685 | 1480         |      |
| Hemoglobin.resultn | =  | Missing    | ALB.resultn        | <  | 3.95        |               |         | 0.002767883  | 1480         |      |
| Hemoglobin.resultn | =  | Missing    | ALB.resultn        | >= | 3.95        |               |         | 0.000275859  | 1480         |      |
| Hemoglobin.resultn | <  | 11.35      |                    |    |             |               |         | -0.000330694 | 1480         |      |
| Hemoglobin.resultn | >= | 11.35      | psc.yrs.dur        | =  | Missing     |               |         | 0.000350892  | 1480         |      |
| Hemoglobin.resultn | >= | 11.35      | psc.yrs.dur        | <  | 0.006844627 |               |         | 0.00264631   | 1480         |      |
| Hemoglobin.resultn | >= | 11.35      | psc.yrs.dur        | >= | 0.006844627 |               |         | 0            | 1480         |      |
| Sodium.resultn     | =  | Missing    |                    |    |             | Missing       |         | -0.000636278 | 1481         |      |
| Sodium.resultn     | <  | 136.5      |                    |    |             | Missing       |         | 0.002171051  | 1481         |      |
| Sodium.resultn     | >= | 136.5      | Hemoglobin.resultn | =  | Missing     | ALB.resultn   | =       | Missing      | 0.00112332   | 1481 |
| Sodium.resultn     | >= | 136.5      | Hemoglobin.resultn | =  | Missing     | ALB.resultn   | <       | 3.95         | 0.003463569  | 1481 |
| Sodium.resultn     | >= | 136.5      | Hemoglobin.resultn | =  | Missing     | ALB.resultn   | >=      | 3.95         | 0            | 1481 |
| Sodium.resultn     | >= | 136.5      | Hemoglobin.resultn | <  | 12.35       |               | Missing | -0.000440912 | 1481         |      |
| Sodium.resultn     | >= | 136.5      | Hemoglobin.resultn | >= | 12.35       |               | Missing | -0.000404788 | 1481         |      |
| age.yrs            | =  | Missing    |                    |    |             |               |         | -0.002450488 | 1482         |      |
| age.yrs            | <  | 51.9945243 |                    |    |             |               |         | -0.002600567 | 1482         |      |
| age.yrs            | >= | 51.9945243 | AST.resultn        | =  | Missing     |               |         | -0.002124066 | 1482         |      |
| age.yrs            | >= | 51.9945243 | AST.resultn        | <  | 54.5        |               |         | -0.003068068 | 1482         |      |
| age.yrs            | >= | 51.9945243 | AST.resultn        | >= | 54.5        | psc.yrs.dur   | =       | Missing      | -0.001105537 | 1482 |
| age.yrs            | >= | 51.9945243 | AST.resultn        | >= | 54.5        | psc.yrs.dur   | <       | 0.476386037  | -0.002333912 | 1482 |
| age.yrs            | >= | 51.9945243 | AST.resultn        | >= | 54.5        | psc.yrs.dur   | >=      | 0.476386037  | 0            | 1482 |
| PLT.resultn        | =  | Missing    |                    |    |             |               |         | -0.002457022 | 1483         |      |
| PLT.resultn        | <  | 198.5      | TBILL.resultn      | =  | Missing     |               |         | -0.001240907 | 1483         |      |
| PLT.resultn        | <  | 198.5      | TBILL.resultn      | <  | 1.15        |               |         | -0.002411543 | 1483         |      |
| PLT.resultn        | <  | 198.5      | TBILL.resultn      | >= | 1.15        |               |         | 0.001100365  | 1483         |      |
| PLT.resultn        | >= | 198.5      | TBILL.resultn      | =  | Missing     |               |         | 0            | 1483         |      |
| PLT.resultn        | >= | 198.5      | TBILL.resultn      | <  | 0.95        |               |         | -0.002236399 | 1483         |      |
| PLT.resultn        | >= | 198.5      | TBILL.resultn      | >= | 0.95        |               |         | -0.001332767 | 1483         |      |
| Sodium.resultn     | =  | Missing    |                    |    |             | Missing       |         | -0.002661809 | 1484         |      |
| Sodium.resultn     | <  | 136.5      |                    |    |             | Missing       |         | -0.001251194 | 1484         |      |
| Sodium.resultn     | >= | 136.5      | TBILL.resultn      | =  | Missing     |               |         | -0.002702385 | 1484         |      |
| Sodium.resultn     | >= | 136.5      | TBILL.resultn      | <  | 3.15        | age.yrs       | =       | Missing      | -0.002674115 | 1484 |
| Sodium.resultn     | >= | 136.5      | TBILL.resultn      | <  | 3.15        | age.yrs       | <       | 69.76043806  | -0.002876699 | 1484 |
| Sodium.resultn     | >= | 136.5      | TBILL.resultn      | <  | 3.15        | age.yrs       | >=      | 69.76043806  | 0            | 1484 |
| Sodium.resultn     | >= | 136.5      | TBILL.resultn      | >= | 3.15        |               | Missing | -0.003103815 | 1484         |      |
| PLT.resultn        | =  | Missing    |                    |    |             |               |         | -0.004122744 | 1485         |      |
| PLT.resultn        | <  | 249.5      | Hemoglobin.resultn | =  | Missing     |               |         | -0.001269035 | 1485         |      |
| PLT.resultn        | <  | 249.5      | Hemoglobin.resultn | <  | 14.15       | ALK.times.uln | =       | Missing      | -0.001475119 | 1485 |
| PLT.resultn        | <  | 249.5      | Hemoglobin.resultn | <  | 14.15       | ALK.times.uln | <       | 1.213043478  | -0.004056577 | 1485 |
| PLT.resultn        | <  | 249.5      | Hemoglobin.resultn | <  | 14.15       | ALK.times.uln | >=      | 1.213043478  | 0            | 1485 |
| PLT.resultn        | <  | 249.5      | Hemoglobin.resultn | >= | 14.15       |               | Missing | -0.004102657 | 1485         |      |
| PLT.resultn        | >= | 249.5      |                    |    |             |               | Missing | -0.003700585 | 1485         |      |
| AST.resultn        | =  | Missing    |                    |    |             |               |         | -0.002674655 | 1486         |      |
| AST.resultn        | <  | 141.5      | AST.resultn        | =  | Missing     |               |         | -0.001700316 | 1486         |      |
| AST.resultn        | <  | 141.5      | AST.resultn        | <  | 43.5        |               |         | -0.002663141 | 1486         |      |
| AST.resultn        | <  | 141.5      | AST.resultn        | >= | 43.5        | age.yrs       | =       | Missing      | -0.001081357 | 1486 |
| AST.resultn        | <  | 141.5      | AST.resultn        | >= | 43.5        | age.yrs       | <       | 51.58521561  | -0.001584314 | 1486 |
| AST.resultn        | <  | 141.5      | AST.resultn        | >= | 43.5        | age.yrs       | >=      | 51.58521561  | 0            | 1486 |
| AST.resultn        | >= | 141.5      |                    |    |             |               | Missing | -0.0023747   | 1486         |      |
| TBILL.resultn      | =  | Missing    |                    |    |             |               |         | -0.000577846 | 1487         |      |
| TBILL.resultn      | <  | 3.05       | ALK.times.uln      | =  | Missing     | ALB.resultn   | =       | Missing      | 0.00073429   | 1487 |
| TBILL.resultn      | <  | 3.05       | ALK.times.uln      | =  | Missing     | ALB.resultn   | <       | 3.95         | 0.002251822  | 1487 |
| TBILL.resultn      | <  | 3.05       | ALK.times.uln      | =  | Missing     | ALB.resultn   | >=      | 3.95         | 0            | 1487 |
| TBILL.resultn      | <  | 3.05       | ALK.times.uln      | <  | 5.462893197 |               | Missing | 0.000162721  | 1487         |      |
| TBILL.resultn      | <  | 3.05       | ALK.times.uln      | >= | 5.462893197 |               | Missing | 0.001854058  | 1487         |      |
| TBILL.resultn      | >= | 3.05       |                    |    |             |               | Missing | -0.000292498 | 1487         |      |
| ALB.resultn        | =  | Missing    |                    |    |             |               |         | -0.001094575 | 1488         |      |
| ALB.resultn        | <  | 3.31       | PLT.resultn        | =  | Missing     |               |         | 0.000569277  | 1488         |      |
| ALB.resultn        | <  | 3.31       | PLT.resultn        | <  | 265         |               |         | 0.001849182  | 1488         |      |
| ALB.resultn        | <  | 3.31       | PLT.resultn        | >= | 265         |               |         | -0.000415266 | 1488         |      |
| ALB.resultn        | >= | 3.31       | ALK.times.uln      | =  | Missing     |               |         | 0            | 1488         |      |
| ALB.resultn        | >= | 3.31       | ALK.times.uln      | <  | 5.31953793  |               |         | -0.000554725 | 1488         |      |

|             |    |             |                    |    |             |                    |    |              |              |      |
|-------------|----|-------------|--------------------|----|-------------|--------------------|----|--------------|--------------|------|
| ALB.resultn | >= | 3.31        | ALK.times.uln      | >= | 5.31953793  |                    |    | 0.001366152  | 1488         |      |
| age.yrs     | =  | Missing     |                    |    |             | Missing            |    | -0.003642309 | 1489         |      |
| age.yrs     | <  | 54.3504449  |                    |    |             | Missing            |    | -0.003958028 | 1489         |      |
| age.yrs     | >= | 54.3504449  | AST.resultn        | =  | Missing     | Missing            |    | -0.002664598 | 1489         |      |
| age.yrs     | >= | 54.3504449  | AST.resultn        | <  | 51.5        | Missing            |    | -0.004207028 | 1489         |      |
| age.yrs     | >= | 54.3504449  | AST.resultn        | >= | 51.5        | psc.yrs.dur        | =  | Missing      | -0.00140261  | 1489 |
| age.yrs     | >= | 54.3504449  | AST.resultn        | >= | 51.5        | psc.yrs.dur        | <  | 0.739219713  | -0.002436112 | 1489 |
| age.yrs     | >= | 54.3504449  | AST.resultn        | >= | 51.5        | psc.yrs.dur        | >= | 0.739219713  | 0            | 1489 |
| psc.yrs.dur | =  | Missing     |                    |    |             |                    |    | 0.000325366  | 1490         |      |
| psc.yrs.dur | <  | 7.817932923 | psc.yrs.dur        | =  | Missing     |                    |    | 0.000151158  | 1490         |      |
| psc.yrs.dur | <  | 7.817932923 | psc.yrs.dur        | <  | 0.001368925 |                    |    | 0.00151845   | 1490         |      |
| psc.yrs.dur | <  | 7.817932923 | psc.yrs.dur        | >= | 0.001368925 |                    |    | 0            | 1490         |      |
| psc.yrs.dur | >= | 7.817932923 | ALB.resultn        | =  | Missing     |                    |    | 0.001492031  | 1490         |      |
| psc.yrs.dur | >= | 7.817932923 | ALB.resultn        | <  | 3.6         |                    |    | 0.002631603  | 1490         |      |
| psc.yrs.dur | >= | 7.817932923 | ALB.resultn        | >= | 3.6         |                    |    | 0.000922245  | 1490         |      |
| ALB.resultn | =  | Missing     |                    |    |             | Missing            |    | -0.000651875 | 1491         |      |
| ALB.resultn | <  | 2.915       |                    |    |             | Missing            |    | 0.000985149  | 1491         |      |
| ALB.resultn | >= | 2.915       | TBILL.resultn      | =  | Missing     | Missing            |    | -0.000641935 | 1491         |      |
| ALB.resultn | >= | 2.915       | TBILL.resultn      | <  | 2.65        | ALK.times.uln      | =  | Missing      | 0            | 1491 |
| ALB.resultn | >= | 2.915       | TBILL.resultn      | <  | 2.65        | ALK.times.uln      | <  | 5.060315261  | -0.000964206 | 1491 |
| ALB.resultn | >= | 2.915       | TBILL.resultn      | <  | 2.65        | ALK.times.uln      | >= | 5.060315261  | 0.001597327  | 1491 |
| ALB.resultn | >= | 2.915       | TBILL.resultn      | >= | 2.65        |                    |    | Missing      | -0.001066684 | 1491 |
| psc.yrs.dur | =  | Missing     |                    |    |             | Missing            |    | Missing      | -0.001091345 | 1492 |
| psc.yrs.dur | <  | 13.02121834 | PLT.resultn        | =  | Missing     |                    |    | Missing      | -0.002011211 | 1492 |
| psc.yrs.dur | <  | 13.02121834 | PLT.resultn        | <  | 172.5       |                    |    | Missing      | 0.000470789  | 1492 |
| psc.yrs.dur | <  | 13.02121834 | PLT.resultn        | >= | 172.5       | Hemoglobin.resultn | =  | Missing      | 0            | 1492 |
| psc.yrs.dur | <  | 13.02121834 | PLT.resultn        | >= | 172.5       | Hemoglobin.resultn | <  | 12.15        | -0.001702524 | 1492 |
| psc.yrs.dur | <  | 13.02121834 | PLT.resultn        | >= | 172.5       | Hemoglobin.resultn | >= | 12.15        | -0.001197634 | 1492 |
| psc.yrs.dur | >= | 13.02121834 |                    |    |             |                    |    | Missing      | 0.00109494   | 1492 |
| age.yrs     | =  | Missing     |                    |    |             | Missing            |    | Missing      | -0.002849775 | 1493 |
| age.yrs     | <  | 53.35934292 |                    |    |             | Missing            |    | Missing      | -0.003023542 | 1493 |
| age.yrs     | >= | 53.35934292 | AST.resultn        | =  | Missing     |                    |    | Missing      | -0.002457686 | 1493 |
| age.yrs     | >= | 53.35934292 | AST.resultn        | <  | 51          |                    |    | Missing      | -0.003563307 | 1493 |
| age.yrs     | >= | 53.35934292 | AST.resultn        | >= | 51          | TBILL.resultn      | =  | Missing      | -0.001091919 | 1493 |
| age.yrs     | >= | 53.35934292 | AST.resultn        | >= | 51          | TBILL.resultn      | <  | 0.85         | -0.002573809 | 1493 |
| age.yrs     | >= | 53.35934292 | AST.resultn        | >= | 51          | TBILL.resultn      | >= | 0.85         | 0            | 1493 |
| ALB.resultn | =  | Missing     |                    |    |             | Missing            |    | Missing      | -0.001603664 | 1494 |
| ALB.resultn | <  | 2.915       |                    |    |             | Missing            |    | Missing      | -0.000736622 | 1494 |
| ALB.resultn | >= | 2.915       | ALK.times.uln      | =  | Missing     | psc.yrs.dur        | =  | Missing      | -0.001864591 | 1494 |
| ALB.resultn | >= | 2.915       | ALK.times.uln      | =  | Missing     | psc.yrs.dur        | <  | 6.984257358  | -0.002355273 | 1494 |
| ALB.resultn | >= | 2.915       | ALK.times.uln      | =  | Missing     | psc.yrs.dur        | >= | 6.984257358  | 0            | 1494 |
| ALB.resultn | >= | 2.915       | ALK.times.uln      | <  | 5.268924303 |                    |    | Missing      | -0.002255834 | 1494 |
| ALB.resultn | >= | 2.915       | ALK.times.uln      | >= | 5.268924303 |                    |    | Missing      | -0.000763421 | 1494 |
| psc.yrs.dur | =  | Missing     |                    |    |             |                    |    |              | 0.000838756  | 1495 |
| psc.yrs.dur | <  | 6.410677618 | AST.resultn        | =  | Missing     |                    |    |              | 0.000725782  | 1495 |
| psc.yrs.dur | <  | 6.410677618 | AST.resultn        | <  | 141.5       |                    |    |              | 0.000807247  | 1495 |
| psc.yrs.dur | <  | 6.410677618 | AST.resultn        | >= | 141.5       |                    |    |              | 0            | 1495 |
| psc.yrs.dur | >= | 6.410677618 | age.yrs            | =  | Missing     |                    |    |              | 0.001682295  | 1495 |
| psc.yrs.dur | >= | 6.410677618 | age.yrs            | <  | 51.58521561 |                    |    |              | 0.000791902  | 1495 |
| psc.yrs.dur | >= | 6.410677618 | age.yrs            | >= | 51.58521561 |                    |    |              | 0.003017884  | 1495 |
| AST.resultn | =  | Missing     |                    |    |             |                    |    | Missing      | -0.003357879 | 1496 |
| AST.resultn | <  | 208.5       | age.yrs            | =  | Missing     |                    |    | Missing      | -0.002672805 | 1496 |
| AST.resultn | <  | 208.5       | age.yrs            | <  | 53.4715948  |                    |    | Missing      | -0.002890686 | 1496 |
| AST.resultn | <  | 208.5       | age.yrs            | >= | 53.4715948  | TBILL.resultn      | =  | Missing      | -0.002082418 | 1496 |
| AST.resultn | <  | 208.5       | age.yrs            | >= | 53.4715948  | TBILL.resultn      | <  | 1.31         | -0.0026141   | 1496 |
| AST.resultn | <  | 208.5       | age.yrs            | >= | 53.4715948  | TBILL.resultn      | >= | 1.31         | 0            | 1496 |
| AST.resultn | >= | 208.5       |                    |    |             |                    |    | Missing      | -0.000624163 | 1496 |
| age.yrs     | =  | Missing     |                    |    |             | Missing            |    | Missing      | 0.000912433  | 1497 |
| age.yrs     | <  | 51.63175907 |                    |    |             | Missing            |    | Missing      | 0.000317459  | 1497 |
| age.yrs     | >= | 51.63175907 | Hemoglobin.resultn | =  | Missing     |                    |    | Missing      | 0.002856741  | 1497 |
| age.yrs     | >= | 51.63175907 | Hemoglobin.resultn | <  | 13.35       |                    |    | Missing      | 0.000676934  | 1497 |
| age.yrs     | >= | 51.63175907 | Hemoglobin.resultn | >= | 13.35       | Sodium.resultn     | =  | Missing      | 0.003287451  | 1497 |

|                    |    |             |                    |    |             |                |         |             |              |        |
|--------------------|----|-------------|--------------------|----|-------------|----------------|---------|-------------|--------------|--------|
| age.yrs            | >= | 51.63175907 | Hemoglobin.resultn | >= | 13.35       | Sodium.resultn | <       | 139.5       | 0.007889883  | 1497   |
| age.yrs            | >= | 51.63175907 | Hemoglobin.resultn | >= | 13.35       | Sodium.resultn | >=      | 139.5       |              | 0 1497 |
| TBILL.resultn      | =  | Missing     |                    |    |             |                |         |             | -0.000205258 | 1498   |
| TBILL.resultn      | <  | 2.05        | ALB.resultn        | =  | Missing     |                |         |             |              | 0 1498 |
| TBILL.resultn      | <  | 2.05        | ALB.resultn        | <  | 3.225       |                |         |             | -0.000297402 | 1498   |
| TBILL.resultn      | <  | 2.05        | ALB.resultn        | >= | 3.225       |                |         |             | -0.002176999 | 1498   |
| TBILL.resultn      | >= | 2.05        | psc.yrs.dur        | =  | Missing     |                |         |             | -0.000627282 | 1498   |
| TBILL.resultn      | >= | 2.05        | psc.yrs.dur        | <  | 0.454483231 |                |         |             | -0.00156524  | 1498   |
| TBILL.resultn      | >= | 2.05        | psc.yrs.dur        | >= | 0.454483231 |                |         |             | 0.000310677  | 1498   |
| PLT.resultn        | =  | Missing     |                    |    |             |                |         |             | -0.001391105 | 1499   |
| PLT.resultn        | <  | 209.5       | ALK.times.uln      | =  | Missing     |                |         |             | -0.001289287 | 1499   |
| PLT.resultn        | <  | 209.5       | ALK.times.uln      | <  | 2.724565217 |                |         |             | -0.002334406 | 1499   |
| PLT.resultn        | <  | 209.5       | ALK.times.uln      | >= | 2.724565217 |                |         |             | 0.000905463  | 1499   |
| PLT.resultn        | >= | 209.5       | ALB.resultn        | =  | Missing     |                |         |             |              | 0 1499 |
| PLT.resultn        | >= | 209.5       | ALB.resultn        | <  | 4.05        |                |         |             | -0.001977743 | 1499   |
| PLT.resultn        | >= | 209.5       | ALB.resultn        | >= | 4.05        |                |         |             | -0.000873961 | 1499   |
| Sodium.resultn     | =  | Missing     |                    |    |             |                |         |             | -5.78E-07    | 1500   |
| Sodium.resultn     | <  | 138.5       | ALK.times.uln      | =  | Missing     |                |         |             | 7.21E-05     | 1500   |
| Sodium.resultn     | <  | 138.5       | ALK.times.uln      | <  | 2.795652174 |                |         |             | 0.000818499  | 1500   |
| Sodium.resultn     | <  | 138.5       | ALK.times.uln      | >= | 2.795652174 |                |         |             | 0.002525152  | 1500   |
| Sodium.resultn     | >= | 138.5       | TBILL.resultn      | =  | Missing     |                |         |             | 0.000516376  | 1500   |
| Sodium.resultn     | >= | 138.5       | TBILL.resultn      | <  | 2.6         |                |         |             | 0.00057131   | 1500   |
| Sodium.resultn     | >= | 138.5       | TBILL.resultn      | >= | 2.6         |                |         |             |              | 0 1500 |
| PLT.resultn        | =  | Missing     |                    |    |             |                |         |             | 0.000758753  | 1501   |
| PLT.resultn        | <  | 198.5       | TBILL.resultn      | =  | Missing     |                |         |             | 0.001432844  | 1501   |
| PLT.resultn        | <  | 198.5       | TBILL.resultn      | <  | 1.65        |                |         |             | 0.000625     | 1501   |
| PLT.resultn        | <  | 198.5       | TBILL.resultn      | >= | 1.65        |                |         |             | 0.003371668  | 1501   |
| PLT.resultn        | >= | 198.5       | TBILL.resultn      | =  | Missing     |                |         |             | 0.000266192  | 1501   |
| PLT.resultn        | >= | 198.5       | TBILL.resultn      | <  | 2.65        |                |         |             | 0.000288507  | 1501   |
| PLT.resultn        | >= | 198.5       | TBILL.resultn      | >= | 2.65        |                |         |             |              | 0 1501 |
| ALK.times.uln      | =  | Missing     | TBILL.resultn      | =  | Missing     |                |         |             | -0.000971779 | 1502   |
| ALK.times.uln      | =  | Missing     | TBILL.resultn      | <  | 1.15        |                |         |             | -0.001457668 | 1502   |
| ALK.times.uln      | =  | Missing     | TBILL.resultn      | >= | 1.15        |                |         |             |              | 0 1502 |
| ALK.times.uln      | <  | 5.446215139 |                    |    |             |                |         |             | -0.001452885 | 1502   |
| ALK.times.uln      | >= | 5.446215139 | AST.resultn        | =  | Missing     |                |         |             | -0.000257448 | 1502   |
| ALK.times.uln      | >= | 5.446215139 | AST.resultn        | <  | 132.5       |                |         |             | 0.000477369  | 1502   |
| ALK.times.uln      | >= | 5.446215139 | AST.resultn        | >= | 132.5       |                |         |             | -0.001065747 | 1502   |
| ALK.times.uln      | =  | Missing     | psc.yrs.dur        | =  | Missing     |                | Missing |             | -0.001914576 | 1503   |
| ALK.times.uln      | =  | Missing     | psc.yrs.dur        | <  | 1.874058864 |                | Missing |             | -0.002324619 | 1503   |
| ALK.times.uln      | =  | Missing     | psc.yrs.dur        | >= | 1.874058864 | age.yrs        | =       | Missing     | -0.001248256 | 1503   |
| ALK.times.uln      | =  | Missing     | psc.yrs.dur        | >= | 1.874058864 | age.yrs        | <       | 50.98151951 | -0.002304473 | 1503   |
| ALK.times.uln      | =  | Missing     | psc.yrs.dur        | >= | 1.874058864 | age.yrs        | >=      | 50.98151951 |              | 0 1503 |
| ALK.times.uln      | <  | 6.02        |                    |    |             |                | Missing |             | -0.001544274 | 1503   |
| ALK.times.uln      | >= | 6.02        |                    |    |             |                | Missing |             | -0.000131492 | 1503   |
| psc.yrs.dur        | =  | Missing     |                    |    |             |                | Missing |             | -0.0027332   | 1504   |
| psc.yrs.dur        | <  | 1.930184805 |                    |    |             |                | Missing |             | -0.003218616 | 1504   |
| psc.yrs.dur        | >= | 1.930184805 | Hemoglobin.resultn | =  | Missing     | TBILL.resultn  | =       | Missing     | -0.001743978 | 1504   |
| psc.yrs.dur        | >= | 1.930184805 | Hemoglobin.resultn | =  | Missing     | TBILL.resultn  | <       | 0.95        | -0.003329413 | 1504   |
| psc.yrs.dur        | >= | 1.930184805 | Hemoglobin.resultn | =  | Missing     | TBILL.resultn  | >=      | 0.95        |              | 0 1504 |
| psc.yrs.dur        | >= | 1.930184805 | Hemoglobin.resultn | <  | 12.05       |                | Missing |             | 0.001414393  | 1504   |
| psc.yrs.dur        | >= | 1.930184805 | Hemoglobin.resultn | >= | 12.05       |                | Missing |             | -0.002334058 | 1504   |
| TBILL.resultn      | =  | Missing     |                    |    |             |                | Missing |             | -0.001722204 | 1505   |
| TBILL.resultn      | <  | 3.75        | AST.resultn        | =  | Missing     |                | Missing |             | -0.001676801 | 1505   |
| TBILL.resultn      | <  | 3.75        | AST.resultn        | <  | 47.5        |                | Missing |             | -0.002519604 | 1505   |
| TBILL.resultn      | <  | 3.75        | AST.resultn        | >= | 47.5        | age.yrs        | =       | Missing     | -0.000905421 | 1505   |
| TBILL.resultn      | <  | 3.75        | AST.resultn        | >= | 47.5        | age.yrs        | <       | 48.89390828 | -0.001335497 | 1505   |
| TBILL.resultn      | <  | 3.75        | AST.resultn        | >= | 47.5        | age.yrs        | >=      | 48.89390828 |              | 0 1505 |
| TBILL.resultn      | >= | 3.75        |                    |    |             |                | Missing |             | -0.001916498 | 1505   |
| Hemoglobin.resultn | =  | Missing     | TBILL.resultn      | =  | Missing     |                | Missing |             | -0.004117523 | 1506   |
| Hemoglobin.resultn | =  | Missing     | TBILL.resultn      | <  | 0.95        |                | Missing |             | -0.003492011 | 1506   |
| Hemoglobin.resultn | =  | Missing     | TBILL.resultn      | >= | 0.95        | age.yrs        | =       | Missing     | -0.001347233 | 1506   |
| Hemoglobin.resultn | =  | Missing     | TBILL.resultn      | >= | 0.95        | age.yrs        | <       | 48.64476386 | -0.002694466 | 1506   |

|                    |    |             |               |    |             |                |    |             |              |      |
|--------------------|----|-------------|---------------|----|-------------|----------------|----|-------------|--------------|------|
| Hemoglobin.resultn | =  | Missing     | TBILI.resultn | >= | 0.95        | age.yrs        | >= | 48.64476386 | 0            | 1506 |
| Hemoglobin.resultn | <  | 11.75       |               |    |             |                |    | Missing     | -0.003814493 | 1506 |
| Hemoglobin.resultn | >= | 11.75       |               |    |             |                |    | Missing     | -0.0031734   | 1506 |
| ALB.resultn        | =  | Missing     |               |    |             |                |    | Missing     | -0.002415503 | 1507 |
| ALB.resultn        | <  | 2.95        |               |    |             |                |    | Missing     | -0.000312503 | 1507 |
| ALB.resultn        | >= | 2.95        | PLT.resultn   | =  | Missing     |                |    | Missing     | -0.000513157 | 1507 |
| ALB.resultn        | >= | 2.95        | PLT.resultn   | <  | 267.5       | ALK.times.uln  | =  | Missing     | 0            | 1507 |
| ALB.resultn        | >= | 2.95        | PLT.resultn   | <  | 267.5       | ALK.times.uln  | <  | 3.165217391 | -0.002134441 | 1507 |
| ALB.resultn        | >= | 2.95        | PLT.resultn   | <  | 267.5       | ALK.times.uln  | >= | 3.165217391 | 0.000423682  | 1507 |
| ALB.resultn        | >= | 2.95        | PLT.resultn   | >= | 267.5       |                |    | Missing     | -0.002461515 | 1507 |
| psc.yrs.dur        | =  | Missing     |               |    |             |                |    |             | -0.00107767  | 1508 |
| psc.yrs.dur        | <  | 6.262833676 | ALB.resultn   | =  | Missing     |                |    |             | 0            | 1508 |
| psc.yrs.dur        | <  | 6.262833676 | ALB.resultn   | <  | 3.135       |                |    |             | -0.00150129  | 1508 |
| psc.yrs.dur        | <  | 6.262833676 | ALB.resultn   | >= | 3.135       |                |    |             | -0.001350104 | 1508 |
| psc.yrs.dur        | >= | 6.262833676 | ALB.resultn   | =  | Missing     |                |    |             | 0.000122888  | 1508 |
| psc.yrs.dur        | >= | 6.262833676 | ALB.resultn   | <  | 3.915       |                |    |             | 0.001582545  | 1508 |
| psc.yrs.dur        | >= | 6.262833676 | ALB.resultn   | >= | 3.915       |                |    |             | -0.001154311 | 1508 |
| ALB.resultn        | =  | Missing     |               |    |             |                |    | Missing     | 0.000383828  | 1509 |
| ALB.resultn        | <  | 2.965       |               |    |             |                |    | Missing     | 0.0018811    | 1509 |
| ALB.resultn        | >= | 2.965       | ALB.resultn   | =  | Missing     |                |    | Missing     | 0.000274774  | 1509 |
| ALB.resultn        | >= | 2.965       | ALB.resultn   | <  | 3.185       |                |    | Missing     | -0.000203219 | 1509 |
| ALB.resultn        | >= | 2.965       | ALB.resultn   | >= | 3.185       | Sodium.resultn | =  | Missing     | 0            | 1509 |
| ALB.resultn        | >= | 2.965       | ALB.resultn   | >= | 3.185       | Sodium.resultn | <  | 138.5       | 0.001456401  | 1509 |
| ALB.resultn        | >= | 2.965       | ALB.resultn   | >= | 3.185       | Sodium.resultn | >= | 138.5       | 6.56E-05     | 1509 |
| age.yrs            | =  | Missing     |               |    |             |                |    | Missing     | 0.000330149  | 1510 |
| age.yrs            | <  | 71.2073922  | PLT.resultn   | =  | Missing     |                |    | Missing     | -4.64E-05    | 1510 |
| age.yrs            | <  | 71.2073922  | PLT.resultn   | <  | 209.5       | ALB.resultn    | =  | Missing     | 0.001178606  | 1510 |
| age.yrs            | <  | 71.2073922  | PLT.resultn   | <  | 209.5       | ALB.resultn    | <  | 3.95        | 0.003428671  | 1510 |
| age.yrs            | <  | 71.2073922  | PLT.resultn   | <  | 209.5       | ALB.resultn    | >= | 3.95        | 0            | 1510 |
| age.yrs            | <  | 71.2073922  | PLT.resultn   | >= | 209.5       |                |    | Missing     | 8.04E-05     | 1510 |
| age.yrs            | >= | 71.2073922  |               |    |             |                |    | Missing     | 0.003265617  | 1510 |
| ALB.resultn        | =  | Missing     |               |    |             |                |    | Missing     | -0.003213183 | 1511 |
| ALB.resultn        | <  | 2.915       |               |    |             |                |    | Missing     | -0.001052529 | 1511 |
| ALB.resultn        | >= | 2.915       | psc.yrs.dur   | =  | Missing     |                |    | Missing     | -0.002616654 | 1511 |
| ALB.resultn        | >= | 2.915       | psc.yrs.dur   | <  | 6.324435318 |                |    | Missing     | -0.002784791 | 1511 |
| ALB.resultn        | >= | 2.915       | psc.yrs.dur   | >= | 6.324435318 | AST.resultn    | =  | Missing     | -0.001493743 | 1511 |
| ALB.resultn        | >= | 2.915       | psc.yrs.dur   | >= | 6.324435318 | AST.resultn    | <  | 47.5        | -0.003217293 | 1511 |
| ALB.resultn        | >= | 2.915       | psc.yrs.dur   | >= | 6.324435318 | AST.resultn    | >= | 47.5        | 0            | 1511 |
| psc.yrs.dur        | =  | Missing     |               |    |             |                |    | Missing     | 0.000905771  | 1512 |
| psc.yrs.dur        | <  | 6.324435318 |               |    |             |                |    | Missing     | 0.000699439  | 1512 |
| psc.yrs.dur        | >= | 6.324435318 | AST.resultn   | =  | Missing     |                |    | Missing     | 0.001864069  | 1512 |
| psc.yrs.dur        | >= | 6.324435318 | AST.resultn   | <  | 89.5        | age.yrs        | =  | Missing     | 0.001692468  | 1512 |
| psc.yrs.dur        | >= | 6.324435318 | AST.resultn   | <  | 89.5        | age.yrs        | <  | 45.67282683 | 0.005415898  | 1512 |
| psc.yrs.dur        | >= | 6.324435318 | AST.resultn   | <  | 89.5        | age.yrs        | >= | 45.67282683 | 0            | 1512 |
| psc.yrs.dur        | >= | 6.324435318 | AST.resultn   | >= | 89.5        |                |    | Missing     | 0.002413192  | 1512 |
| psc.yrs.dur        | =  | Missing     |               |    |             |                |    | Missing     | -8.80E-06    | 1513 |
| psc.yrs.dur        | <  | 2.05065024  |               |    |             |                |    | Missing     | -0.000312565 | 1513 |
| psc.yrs.dur        | >= | 2.05065024  | age.yrs       | =  | Missing     |                |    | Missing     | 0.000676627  | 1513 |
| psc.yrs.dur        | >= | 2.05065024  | age.yrs       | <  | 60.04928131 | psc.yrs.dur    | =  | Missing     | 0.000355639  | 1513 |
| psc.yrs.dur        | >= | 2.05065024  | age.yrs       | <  | 60.04928131 | psc.yrs.dur    | <  | 2.911704312 | 0.002418347  | 1513 |
| psc.yrs.dur        | >= | 2.05065024  | age.yrs       | <  | 60.04928131 | psc.yrs.dur    | >= | 2.911704312 | 0            | 1513 |
| psc.yrs.dur        | >= | 2.05065024  | age.yrs       | >= | 60.04928131 |                |    | Missing     | 0.002859341  | 1513 |
| Sodium.resultn     | =  | Missing     | psc.yrs.dur   | =  | Missing     |                |    |             | -0.000961727 | 1514 |
| Sodium.resultn     | =  | Missing     | psc.yrs.dur   | <  | 6.592744695 |                |    |             | -0.001281604 | 1514 |
| Sodium.resultn     | =  | Missing     | psc.yrs.dur   | >= | 6.592744695 |                |    |             | 0.001422804  | 1514 |
| Sodium.resultn     | <  | 136.5       |               |    |             |                |    |             | 0.000728994  | 1514 |
| Sodium.resultn     | >= | 136.5       | TBILI.resultn | =  | Missing     |                |    |             | -0.000751963 | 1514 |
| Sodium.resultn     | >= | 136.5       | TBILI.resultn | <  | 3.35        |                |    |             | -0.000813692 | 1514 |
| Sodium.resultn     | >= | 136.5       | TBILI.resultn | >= | 3.35        |                |    |             | 0            | 1514 |
| age.yrs            | =  | Missing     |               |    |             |                |    |             | -0.000112581 | 1515 |
| age.yrs            | <  | 62.47912389 | ALK.times.uln | =  | Missing     |                |    |             | 0            | 1515 |
| age.yrs            | <  | 62.47912389 | ALK.times.uln | <  | 7.868810472 |                |    |             | -0.000317075 | 1515 |

|               |    |             |                    |    |             |                    |         |              |              |      |
|---------------|----|-------------|--------------------|----|-------------|--------------------|---------|--------------|--------------|------|
| age.yrs       | <  | 62.47912389 | ALK.times.uln      | >= | 7.868810472 |                    |         | -0.000535675 | 1515         |      |
| age.yrs       | >= | 62.47912389 | AST.resultn        | =  | Missing     |                    |         | 0.000849254  | 1515         |      |
| age.yrs       | >= | 62.47912389 | AST.resultn        | <  | 49          |                    |         | -0.001009448 | 1515         |      |
| age.yrs       | >= | 62.47912389 | AST.resultn        | >= | 49          |                    |         | 0.003106248  | 1515         |      |
| ALB.resultn   | =  | Missing     |                    |    |             |                    |         | -0.001460748 | 1516         |      |
| ALB.resultn   | <  | 3.31        | psc.yrs.dur        | =  | Missing     |                    |         | 0.000449451  | 1516         |      |
| ALB.resultn   | <  | 3.31        | psc.yrs.dur        | <  | 1.497604381 |                    |         | -0.000601425 | 1516         |      |
| ALB.resultn   | <  | 3.31        | psc.yrs.dur        | >= | 1.497604381 |                    |         | 0.001587899  | 1516         |      |
| ALB.resultn   | >= | 3.31        | Hemoglobin.resultn | =  | Missing     |                    |         | 0            | 1516         |      |
| ALB.resultn   | >= | 3.31        | Hemoglobin.resultn | <  | 13.35       |                    |         | -0.000139056 | 1516         |      |
| ALB.resultn   | >= | 3.31        | Hemoglobin.resultn | >= | 13.35       |                    |         | -0.001459766 | 1516         |      |
| age.yrs       | =  | Missing     |                    |    |             |                    | Missing | -0.00035754  | 1517         |      |
| age.yrs       | <  | 53.64681725 |                    |    |             |                    | Missing | -0.00046795  | 1517         |      |
| age.yrs       | >= | 53.64681725 | AST.resultn        | =  | Missing     |                    | Missing | -2.98E-05    | 1517         |      |
| age.yrs       | >= | 53.64681725 | AST.resultn        | <  | 51          |                    | Missing | -0.001055583 | 1517         |      |
| age.yrs       | >= | 53.64681725 | AST.resultn        | >= | 51          | PLT.resultn        | =       | Missing      | 0.001252516  | 1517 |
| age.yrs       | >= | 53.64681725 | AST.resultn        | >= | 51          | PLT.resultn        | <       | 251.5        | 0.00211362   | 1517 |
| age.yrs       | >= | 53.64681725 | AST.resultn        | >= | 51          | PLT.resultn        | >=      | 251.5        | 0            | 1517 |
| ALB.resultn   | =  | Missing     |                    |    |             |                    | Missing | -0.0009691   | 1518         |      |
| ALB.resultn   | <  | 2.915       |                    |    |             |                    | Missing | 0.001128747  | 1518         |      |
| ALB.resultn   | >= | 2.915       | TBILL.resultn      | =  | Missing     |                    | Missing | -0.001580175 | 1518         |      |
| ALB.resultn   | >= | 2.915       | TBILL.resultn      | <  | 1.75        | TBILL.resultn      | =       | Missing      | -0.001583434 | 1518 |
| ALB.resultn   | >= | 2.915       | TBILL.resultn      | <  | 1.75        | TBILL.resultn      | <       | 1.25         | -0.001841202 | 1518 |
| ALB.resultn   | >= | 2.915       | TBILL.resultn      | <  | 1.75        | TBILL.resultn      | >=      | 1.25         | 0            | 1518 |
| ALB.resultn   | >= | 2.915       | TBILL.resultn      | >= | 1.75        |                    | Missing | -0.001543969 | 1518         |      |
| ALB.resultn   | =  | Missing     |                    |    |             |                    | Missing | 8.92E-06     | 1519         |      |
| ALB.resultn   | <  | 2.915       |                    |    |             |                    | Missing | 0.002755089  | 1519         |      |
| ALB.resultn   | >= | 2.915       | PLT.resultn        | =  | Missing     |                    | Missing | 0.001218607  | 1519         |      |
| ALB.resultn   | >= | 2.915       | PLT.resultn        | <  | 205         | Hemoglobin.resultn | =       | Missing      | 0.002402523  | 1519 |
| ALB.resultn   | >= | 2.915       | PLT.resultn        | <  | 205         | Hemoglobin.resultn | <       | 13.85        | 0.005766056  | 1519 |
| ALB.resultn   | >= | 2.915       | PLT.resultn        | <  | 205         | Hemoglobin.resultn | >=      | 13.85        | 0            | 1519 |
| ALB.resultn   | >= | 2.915       | PLT.resultn        | >= | 205         |                    | Missing | 0.000674871  | 1519         |      |
| ALK.times.uln | =  | Missing     | TBILL.resultn      | =  | Missing     |                    |         | -0.000620357 | 1520         |      |
| ALK.times.uln | =  | Missing     | TBILL.resultn      | <  | 1.35        |                    |         | -0.001159158 | 1520         |      |
| ALK.times.uln | =  | Missing     | TBILL.resultn      | >= | 1.35        |                    |         | 0.001373206  | 1520         |      |
| ALK.times.uln | <  | 6.02173913  | ALB.resultn        | =  | Missing     |                    |         | 0            | 1520         |      |
| ALK.times.uln | <  | 6.02173913  | ALB.resultn        | <  | 3.135       |                    |         | -0.00118269  | 1520         |      |
| ALK.times.uln | <  | 6.02173913  | ALB.resultn        | >= | 3.135       |                    |         | -0.000272267 | 1520         |      |
| ALK.times.uln | >= | 6.02173913  |                    |    |             |                    |         | 0.000754901  | 1520         |      |
| PLT.resultn   | =  | Missing     |                    |    |             |                    |         | 0.000908478  | 1521         |      |
| PLT.resultn   | <  | 204.5       | ALK.times.uln      | =  | Missing     |                    |         | 0.00163983   | 1521         |      |
| PLT.resultn   | <  | 204.5       | ALK.times.uln      | <  | 2.458431872 |                    |         | -2.05E-05    | 1521         |      |
| PLT.resultn   | <  | 204.5       | ALK.times.uln      | >= | 2.458431872 |                    |         | 0.004462427  | 1521         |      |
| PLT.resultn   | >= | 204.5       | Sodium.resultn     | =  | Missing     |                    |         | 0            | 1521         |      |
| PLT.resultn   | >= | 204.5       | Sodium.resultn     | <  | 137.5       |                    |         | 0.002297638  | 1521         |      |
| PLT.resultn   | >= | 204.5       | Sodium.resultn     | >= | 137.5       |                    |         | 0.000533762  | 1521         |      |
| ALK.times.uln | =  | Missing     | age.yrs            | =  | Missing     |                    | Missing | -0.002361281 | 1522         |      |
| ALK.times.uln | =  | Missing     | age.yrs            | <  | 53.35934292 |                    | Missing | -0.002804695 | 1522         |      |
| ALK.times.uln | =  | Missing     | age.yrs            | >= | 53.35934292 | AST.resultn        | =       | Missing      | -0.001389994 | 1522 |
| ALK.times.uln | =  | Missing     | age.yrs            | >= | 53.35934292 | AST.resultn        | <       | 42           | -0.002779988 | 1522 |
| ALK.times.uln | =  | Missing     | age.yrs            | >= | 53.35934292 | AST.resultn        | >=      | 42           | 0            | 1522 |
| ALK.times.uln | <  | 5.438574341 |                    |    |             |                    | Missing | -0.002087828 | 1522         |      |
| ALK.times.uln | >= | 5.438574341 |                    |    |             |                    | Missing | -0.000887768 | 1522         |      |
| TBILL.resultn | =  | Missing     |                    |    |             |                    |         | 0.001000052  | 1523         |      |
| TBILL.resultn | <  | 2.05        | Sodium.resultn     | =  | Missing     |                    |         | 0            | 1523         |      |
| TBILL.resultn | <  | 2.05        | Sodium.resultn     | <  | 137.5       |                    |         | 0.002144657  | 1523         |      |
| TBILL.resultn | <  | 2.05        | Sodium.resultn     | >= | 137.5       |                    |         | 3.76E-05     | 1523         |      |
| TBILL.resultn | >= | 2.05        | Hemoglobin.resultn | =  | Missing     |                    |         | 0.001175902  | 1523         |      |
| TBILL.resultn | >= | 2.05        | Hemoglobin.resultn | <  | 13.85       |                    |         | 0.001744488  | 1523         |      |
| TBILL.resultn | >= | 2.05        | Hemoglobin.resultn | >= | 13.85       |                    |         | 0.000607315  | 1523         |      |
| ALK.times.uln | =  | Missing     | TBILL.resultn      | =  | Missing     |                    |         | -0.001460422 | 1524         |      |
| ALK.times.uln | =  | Missing     | TBILL.resultn      | <  | 1.35        |                    |         | -0.000730199 | 1524         |      |

|                |    |             |               |    |             |                    |    |              |              |      |
|----------------|----|-------------|---------------|----|-------------|--------------------|----|--------------|--------------|------|
| ALK.times.uln  | =  | Missing     | TBILL.resultn | >= | 1.35        |                    |    | 0.002335997  | 1524         |      |
| ALK.times.uln  | <  | 6.012755102 | ALK.times.uln | =  | Missing     |                    |    | -0.001118286 | 1524         |      |
| ALK.times.uln  | <  | 6.012755102 | ALK.times.uln | <  | 2.822501299 |                    |    | -0.001520868 | 1524         |      |
| ALK.times.uln  | <  | 6.012755102 | ALK.times.uln | >= | 2.822501299 |                    |    | 0            | 1524         |      |
| ALK.times.uln  | >= | 6.012755102 |               |    |             |                    |    | 0.000139682  | 1524         |      |
| PLT.resultn    | =  | Missing     |               |    |             | Missing            |    | -0.001129112 | 1525         |      |
| PLT.resultn    | <  | 180.5       |               |    |             | Missing            |    | 0.002325729  | 1525         |      |
| PLT.resultn    | >= | 180.5       | psc.yrs.dur   | =  | Missing     |                    |    | -9.63E-05    | 1525         |      |
| PLT.resultn    | >= | 180.5       | psc.yrs.dur   | <  | 0.004106776 | PLT.resultn        | =  | Missing      | 0.001722513  | 1525 |
| PLT.resultn    | >= | 180.5       | psc.yrs.dur   | <  | 0.004106776 | PLT.resultn        | <  | 285.5        | 0.003789528  | 1525 |
| PLT.resultn    | >= | 180.5       | psc.yrs.dur   | <  | 0.004106776 | PLT.resultn        | >= | 285.5        | 0            | 1525 |
| PLT.resultn    | >= | 180.5       | psc.yrs.dur   | >= | 0.004106776 |                    |    | Missing      | -0.000301497 | 1525 |
| ALK.times.uln  | =  | Missing     |               |    |             | Missing            |    | -0.000164251 | 1526         |      |
| ALK.times.uln  | <  | 2.822501299 |               |    |             | Missing            |    | -0.000342897 | 1526         |      |
| ALK.times.uln  | >= | 2.822501299 | AST.resultn   | =  | Missing     |                    |    | 0.001235515  | 1526         |      |
| ALK.times.uln  | >= | 2.822501299 | AST.resultn   | <  | 62.5        |                    |    | 0.005303384  | 1526         |      |
| ALK.times.uln  | >= | 2.822501299 | AST.resultn   | >= | 62.5        | PLT.resultn        | =  | Missing      | 0.000405337  | 1526 |
| ALK.times.uln  | >= | 2.822501299 | AST.resultn   | >= | 62.5        | PLT.resultn        | <  | 211          | 0.001824018  | 1526 |
| ALK.times.uln  | >= | 2.822501299 | AST.resultn   | >= | 62.5        | PLT.resultn        | >= | 211          | 0            | 1526 |
| age.yrs        | =  | Missing     |               |    |             | Missing            |    | -0.002104635 | 1527         |      |
| age.yrs        | <  | 53.64681725 |               |    |             | Missing            |    | -0.002162915 | 1527         |      |
| age.yrs        | >= | 53.64681725 | AST.resultn   | =  | Missing     |                    |    | -0.001954422 | 1527         |      |
| age.yrs        | >= | 53.64681725 | AST.resultn   | <  | 56.5        |                    |    | -0.002845412 | 1527         |      |
| age.yrs        | >= | 53.64681725 | AST.resultn   | >= | 56.5        | psc.yrs.dur        | =  | Missing      | -0.000766434 | 1527 |
| age.yrs        | >= | 53.64681725 | AST.resultn   | >= | 56.5        | psc.yrs.dur        | <  | 0.454483231  | -0.002090275 | 1527 |
| age.yrs        | >= | 53.64681725 | AST.resultn   | >= | 56.5        | psc.yrs.dur        | >= | 0.454483231  | 0            | 1527 |
| age.yrs        | =  | Missing     |               |    |             | Missing            |    | 0.000435836  | 1528         |      |
| age.yrs        | <  | 69.3798768  | ALB.resultn   | =  | Missing     |                    |    | 1.90E-05     | 1528         |      |
| age.yrs        | <  | 69.3798768  | ALB.resultn   | <  | 2.95        |                    |    | 0.001247137  | 1528         |      |
| age.yrs        | <  | 69.3798768  | ALB.resultn   | >= | 2.95        | TBILL.resultn      | =  | Missing      | 0.000303613  | 1528 |
| age.yrs        | <  | 69.3798768  | ALB.resultn   | >= | 2.95        | TBILL.resultn      | <  | 2.65         | 0.000331363  | 1528 |
| age.yrs        | <  | 69.3798768  | ALB.resultn   | >= | 2.95        | TBILL.resultn      | >= | 2.65         | 0            | 1528 |
| age.yrs        | >= | 69.3798768  |               |    |             |                    |    | Missing      | 0.003543964  | 1528 |
| age.yrs        | =  | Missing     |               |    |             | Missing            |    | 0.000942962  | 1529         |      |
| age.yrs        | <  | 68.66119097 | PLT.resultn   | =  | Missing     |                    |    | 0.00072939   | 1529         |      |
| age.yrs        | <  | 68.66119097 | PLT.resultn   | <  | 209.5       | Hemoglobin.resultn | =  | Missing      | 0.001165903  | 1529 |
| age.yrs        | <  | 68.66119097 | PLT.resultn   | <  | 209.5       | Hemoglobin.resultn | <  | 13.75        | 0.003497708  | 1529 |
| age.yrs        | <  | 68.66119097 | PLT.resultn   | <  | 209.5       | Hemoglobin.resultn | >= | 13.75        | 0            | 1529 |
| age.yrs        | <  | 68.66119097 | PLT.resultn   | >= | 209.5       |                    |    | Missing      | 0.000578931  | 1529 |
| age.yrs        | >= | 68.66119097 |               |    |             |                    |    | Missing      | 0.006953807  | 1529 |
| PLT.resultn    | =  | Missing     | psc.yrs.dur   | =  | Missing     |                    |    | 0.000335243  | 1530         |      |
| PLT.resultn    | =  | Missing     | psc.yrs.dur   | <  | 0.238193018 |                    |    | -0.001568862 | 1530         |      |
| PLT.resultn    | =  | Missing     | psc.yrs.dur   | >= | 0.238193018 |                    |    | 0.003191399  | 1530         |      |
| PLT.resultn    | <  | 170         |               |    |             |                    |    | 0.002908288  | 1530         |      |
| PLT.resultn    | >= | 170         | TBILL.resultn | =  | Missing     |                    |    | 0            | 1530         |      |
| PLT.resultn    | >= | 170         | TBILL.resultn | <  | 1.45        |                    |    | -0.000579786 | 1530         |      |
| PLT.resultn    | >= | 170         | TBILL.resultn | >= | 1.45        |                    |    | -0.001272769 | 1530         |      |
| TBILL.resultn  | =  | Missing     |               |    |             |                    |    | Missing      | -0.000105947 | 1531 |
| TBILL.resultn  | <  | 1.55        |               |    |             |                    |    | Missing      | -0.001459188 | 1531 |
| TBILL.resultn  | >= | 1.55        | age.yrs       | =  | Missing     |                    |    | Missing      | -0.00072789  | 1531 |
| TBILL.resultn  | >= | 1.55        | age.yrs       | <  | 53.28268309 | AST.resultn        | =  | Missing      | -0.001186791 | 1531 |
| TBILL.resultn  | >= | 1.55        | age.yrs       | <  | 53.28268309 | AST.resultn        | <  | 125          | -0.001928536 | 1531 |
| TBILL.resultn  | >= | 1.55        | age.yrs       | <  | 53.28268309 | AST.resultn        | >= | 125          | 0            | 1531 |
| TBILL.resultn  | >= | 1.55        | age.yrs       | >= | 53.28268309 |                    |    | Missing      | 0.000465255  | 1531 |
| age.yrs        | =  | Missing     |               |    |             |                    |    | Missing      | -0.000424319 | 1532 |
| age.yrs        | <  | 53.4715948  |               |    |             |                    |    | Missing      | -0.000716856 | 1532 |
| age.yrs        | >= | 53.4715948  | AST.resultn   | =  | Missing     |                    |    | Missing      | 0.00040897   | 1532 |
| age.yrs        | >= | 53.4715948  | AST.resultn   | <  | 51.5        |                    |    | Missing      | -0.001276483 | 1532 |
| age.yrs        | >= | 53.4715948  | AST.resultn   | >= | 51.5        | AST.resultn        | =  | Missing      | 0.001719879  | 1532 |
| age.yrs        | >= | 53.4715948  | AST.resultn   | >= | 51.5        | AST.resultn        | <  | 72           | 0.004762741  | 1532 |
| age.yrs        | >= | 53.4715948  | AST.resultn   | >= | 51.5        | AST.resultn        | >= | 72           | 0            | 1532 |
| Sodium.resultn | =  | Missing     | TBILL.resultn | =  | Missing     |                    |    | -0.001515268 | 1533         |      |

|                |    |             |                    |    |             |               |         |              |              |      |
|----------------|----|-------------|--------------------|----|-------------|---------------|---------|--------------|--------------|------|
| Sodium.resultn | =  | Missing     | TBILL.resultn      | <  | 1.55        |               |         | -0.001743596 | 1533         |      |
| Sodium.resultn | =  | Missing     | TBILL.resultn      | >= | 1.55        |               |         | 0            | 1533         |      |
| Sodium.resultn | <  | 136.5       |                    |    |             |               |         | 0.001682612  | 1533         |      |
| Sodium.resultn | >= | 136.5       | age.yrs            | =  | Missing     |               |         | -0.001001815 | 1533         |      |
| Sodium.resultn | >= | 136.5       | age.yrs            | <  | 64.89253936 |               |         | -0.001302947 | 1533         |      |
| Sodium.resultn | >= | 136.5       | age.yrs            | >= | 64.89253936 |               |         | 0.001880445  | 1533         |      |
| ALB.resultn    | =  | Missing     |                    |    |             | Missing       |         | -0.002442217 | 1534         |      |
| ALB.resultn    | <  | 2.965       |                    |    |             | Missing       |         | -9.83E-05    | 1534         |      |
| ALB.resultn    | >= | 2.965       | PLT.resultn        | =  | Missing     | Missing       |         | -0.001430254 | 1534         |      |
| ALB.resultn    | >= | 2.965       | PLT.resultn        | <  | 206.5       | TBILL.resultn | =       | Missing      | -0.001073377 | 1534 |
| ALB.resultn    | >= | 2.965       | PLT.resultn        | <  | 206.5       | TBILL.resultn | <       | 1.55         | -0.001456726 | 1534 |
| ALB.resultn    | >= | 2.965       | PLT.resultn        | <  | 206.5       | TBILL.resultn | >=      | 1.55         | 0            | 1534 |
| ALB.resultn    | >= | 2.965       | PLT.resultn        | >= | 206.5       |               | Missing | -0.002087574 | 1534         |      |
| age.yrs        | =  | Missing     |                    |    |             | Missing       |         | -0.002562333 | 1535         |      |
| age.yrs        | <  | 53.64681725 |                    |    |             | Missing       |         | -0.00269281  | 1535         |      |
| age.yrs        | >= | 53.64681725 | AST.resultn        | =  | Missing     | Missing       |         | -0.002212504 | 1535         |      |
| age.yrs        | >= | 53.64681725 | AST.resultn        | <  | 51.5        | Missing       |         | -0.003306328 | 1535         |      |
| age.yrs        | >= | 53.64681725 | AST.resultn        | >= | 51.5        | psc.yrs.dur   | =       | Missing      | -0.001118681 | 1535 |
| age.yrs        | >= | 53.64681725 | AST.resultn        | >= | 51.5        | psc.yrs.dur   | <       | 0.454483231  | -0.00200185  | 1535 |
| age.yrs        | >= | 53.64681725 | AST.resultn        | >= | 51.5        | psc.yrs.dur   | >=      | 0.454483231  | 0            | 1535 |
| ALK.times.uln  | =  | Missing     | psc.yrs.dur        | =  | Missing     | Missing       |         | 0.000652105  | 1536         |      |
| ALK.times.uln  | =  | Missing     | psc.yrs.dur        | <  | 1.874058864 | Missing       |         | 0.000203555  | 1536         |      |
| ALK.times.uln  | =  | Missing     | psc.yrs.dur        | <  | 1.874058864 | ALB.resultn   | =       | Missing      | 0.001144063  | 1536 |
| ALK.times.uln  | =  | Missing     | psc.yrs.dur        | >= | 1.874058864 | ALB.resultn   | <       | 3.95         | 0.002376132  | 1536 |
| ALK.times.uln  | =  | Missing     | psc.yrs.dur        | >= | 1.874058864 | ALB.resultn   | >=      | 3.95         | 0            | 1536 |
| ALK.times.uln  | <  | 6.02173913  |                    |    |             | Missing       |         | 0.000615307  | 1536         |      |
| ALK.times.uln  | >= | 6.02173913  |                    |    |             | Missing       |         | 0.002516489  | 1536         |      |
| ALB.resultn    | =  | Missing     |                    |    |             | Missing       |         | -0.002350563 | 1537         |      |
| ALB.resultn    | <  | 2.95        |                    |    |             | Missing       |         | -0.000485998 | 1537         |      |
| ALB.resultn    | >= | 2.95        | Hemoglobin.resultn | =  | Missing     | TBILL.resultn | =       | Missing      | -0.001315172 | 1537 |
| ALB.resultn    | >= | 2.95        | Hemoglobin.resultn | =  | Missing     | TBILL.resultn | <       | 1.25         | -0.00184124  | 1537 |
| ALB.resultn    | >= | 2.95        | Hemoglobin.resultn | =  | Missing     | TBILL.resultn | >=      | 1.25         | 0            | 1537 |
| ALB.resultn    | >= | 2.95        | Hemoglobin.resultn | <  | 11.3        | Missing       |         | -0.00199198  | 1537         |      |
| ALB.resultn    | >= | 2.95        | Hemoglobin.resultn | >= | 11.3        | Missing       |         | -0.001454    | 1537         |      |
| PLT.resultn    | =  | Missing     |                    |    |             | Missing       |         | -0.001956976 | 1538         |      |
| PLT.resultn    | <  | 249.5       | ALK.times.uln      | =  | Missing     | TBILL.resultn | =       | Missing      | -0.001577023 | 1538 |
| PLT.resultn    | <  | 249.5       | ALK.times.uln      | =  | Missing     | TBILL.resultn | <       | 0.85         | -0.002790117 | 1538 |
| PLT.resultn    | <  | 249.5       | ALK.times.uln      | =  | Missing     | TBILL.resultn | >=      | 0.85         | 0            | 1538 |
| PLT.resultn    | <  | 249.5       | ALK.times.uln      | <  | 2.84063745  | Missing       |         | -0.002008582 | 1538         |      |
| PLT.resultn    | <  | 249.5       | ALK.times.uln      | >= | 2.84063745  | Missing       |         | 7.83E-05     | 1538         |      |
| PLT.resultn    | >= | 249.5       |                    |    |             | Missing       |         | -0.002286284 | 1538         |      |
| Sodium.resultn | =  | Missing     |                    |    |             | Missing       |         | -0.002353085 | 1539         |      |
| Sodium.resultn | <  | 138.5       | psc.yrs.dur        | =  | Missing     | Missing       |         | -0.000795966 | 1539         |      |
| Sodium.resultn | <  | 138.5       | psc.yrs.dur        | <  | 1.516769336 | Missing       |         | -0.001894428 | 1539         |      |
| Sodium.resultn | <  | 138.5       | psc.yrs.dur        | >= | 1.516769336 | TBILL.resultn | =       | Missing      | 0.00058905   | 1539 |
| Sodium.resultn | <  | 138.5       | psc.yrs.dur        | >= | 1.516769336 | TBILL.resultn | <       | 1.05         | 0.001295911  | 1539 |
| Sodium.resultn | <  | 138.5       | psc.yrs.dur        | >= | 1.516769336 | TBILL.resultn | >=      | 1.05         | 0            | 1539 |
| Sodium.resultn | >= | 138.5       |                    |    |             | Missing       |         | -0.001919298 | 1539         |      |
| TBILL.resultn  | =  | Missing     |                    |    |             | Missing       |         | -0.002754302 | 1540         |      |
| TBILL.resultn  | <  | 2.55        | psc.yrs.dur        | =  | Missing     | Missing       |         | -0.003272243 | 1540         |      |
| TBILL.resultn  | <  | 2.55        | psc.yrs.dur        | <  | 2.308008214 | psc.yrs.dur   | =       | Missing      | -0.003032567 | 1540 |
| TBILL.resultn  | <  | 2.55        | psc.yrs.dur        | <  | 2.308008214 | psc.yrs.dur   | <       | 1.708418891  | -0.003228217 | 1540 |
| TBILL.resultn  | <  | 2.55        | psc.yrs.dur        | <  | 2.308008214 | psc.yrs.dur   | >=      | 1.708418891  | 0            | 1540 |
| TBILL.resultn  | <  | 2.55        | psc.yrs.dur        | >= | 2.308008214 | Missing       |         | -0.003991271 | 1540         |      |
| TBILL.resultn  | >= | 2.55        |                    |    |             | Missing       |         | -0.002007286 | 1540         |      |
| PLT.resultn    | =  | Missing     |                    |    |             |               |         | 0.000106073  | 1541         |      |
| PLT.resultn    | <  | 209.5       | ALB.resultn        | =  | Missing     |               |         | 0.000810264  | 1541         |      |
| PLT.resultn    | <  | 209.5       | ALB.resultn        | <  | 3.85        |               |         | 0.00338532   | 1541         |      |
| PLT.resultn    | <  | 209.5       | ALB.resultn        | >= | 3.85        |               |         | 5.56E-06     | 1541         |      |
| PLT.resultn    | >= | 209.5       | ALK.times.uln      | =  | Missing     |               |         | 0            | 1541         |      |
| PLT.resultn    | >= | 209.5       | ALK.times.uln      | <  | 6.02        |               |         | -3.90E-05    | 1541         |      |
| PLT.resultn    | >= | 209.5       | ALK.times.uln      | >= | 6.02        |               |         | 0.001171435  | 1541         |      |

|                |    |             |               |    |             |               |         |              |              |      |
|----------------|----|-------------|---------------|----|-------------|---------------|---------|--------------|--------------|------|
| Sodium.resultn | =  | Missing     |               |    |             |               |         | 7.07E-05     | 1542         |      |
| Sodium.resultn | <  | 136.5       | TBILL.resultn | =  | Missing     |               |         | 0.001933097  | 1542         |      |
| Sodium.resultn | <  | 136.5       | TBILL.resultn | <  | 0.75        |               |         | 0.000337011  | 1542         |      |
| Sodium.resultn | <  | 136.5       | TBILL.resultn | >= | 0.75        |               |         | 0.003688791  | 1542         |      |
| Sodium.resultn | >= | 136.5       | TBILL.resultn | =  | Missing     |               |         | 0.000507469  | 1542         |      |
| Sodium.resultn | >= | 136.5       | TBILL.resultn | <  | 3.75        |               |         | 0.000549758  | 1542         |      |
| Sodium.resultn | >= | 136.5       | TBILL.resultn | >= | 3.75        |               |         | 0            | 1542         |      |
| TBILL.resultn  | =  | Missing     |               |    |             |               |         | 0.002020649  | 1543         |      |
| TBILL.resultn  | <  | 1.95        | AST.resultn   | =  | Missing     |               |         | 0.000779822  | 1543         |      |
| TBILL.resultn  | <  | 1.95        | AST.resultn   | <  | 73.5        |               |         | 0.001106504  | 1543         |      |
| TBILL.resultn  | <  | 1.95        | AST.resultn   | >= | 73.5        |               |         | 0            | 1543         |      |
| TBILL.resultn  | >= | 1.95        | PLT.resultn   | =  | Missing     |               |         | 0.001462951  | 1543         |      |
| TBILL.resultn  | >= | 1.95        | PLT.resultn   | <  | 220         |               |         | 0.00304693   | 1543         |      |
| TBILL.resultn  | >= | 1.95        | PLT.resultn   | >= | 220         |               |         | 0.000472965  | 1543         |      |
| ALB.resultn    | =  | Missing     |               |    |             | Missing       |         | -0.001646794 | 1544         |      |
| ALB.resultn    | <  | 2.95        |               |    |             | Missing       |         | -0.000229177 | 1544         |      |
| ALB.resultn    | >= | 2.95        | ALK.times.uln | =  | Missing     | TBILL.resultn | =       | Missing      | -0.001603074 | 1544 |
| ALB.resultn    | >= | 2.95        | ALK.times.uln | =  | Missing     | TBILL.resultn | <       | 1.15         | -0.002151494 | 1544 |
| ALB.resultn    | >= | 2.95        | ALK.times.uln | =  | Missing     | TBILL.resultn | >=      | 1.15         | 0            | 1544 |
| ALB.resultn    | >= | 2.95        | ALK.times.uln | <  | 5.462893197 |               | Missing |              | -0.001724616 | 1544 |
| ALB.resultn    | >= | 2.95        | ALK.times.uln | >= | 5.462893197 |               | Missing |              | -0.000390369 | 1544 |
| psc.yrs.dur    | =  | Missing     |               |    |             |               |         | 0.000932975  | 1545         |      |
| psc.yrs.dur    | <  | 6.262833676 | PLT.resultn   | =  | Missing     |               |         | 0            | 1545         |      |
| psc.yrs.dur    | <  | 6.262833676 | PLT.resultn   | <  | 249.5       |               |         | 0.00163948   | 1545         |      |
| psc.yrs.dur    | <  | 6.262833676 | PLT.resultn   | >= | 249.5       |               |         | 0.000381605  | 1545         |      |
| psc.yrs.dur    | >= | 6.262833676 | AST.resultn   | =  | Missing     |               |         | 0.001802012  | 1545         |      |
| psc.yrs.dur    | >= | 6.262833676 | AST.resultn   | <  | 43          |               |         | 6.26E-05     | 1545         |      |
| psc.yrs.dur    | >= | 6.262833676 | AST.resultn   | >= | 43          |               |         | 0.00305822   | 1545         |      |
| Sodium.resultn | =  | Missing     |               |    |             | Missing       |         | 9.85E-05     | 1546         |      |
| Sodium.resultn | <  | 140.5       | psc.yrs.dur   | =  | Missing     |               | Missing |              | 0.001671326  | 1546 |
| Sodium.resultn | <  | 140.5       | psc.yrs.dur   | <  | 7.330595483 | AST.resultn   | =       | Missing      | 0.001339973  | 1546 |
| Sodium.resultn | <  | 140.5       | psc.yrs.dur   | <  | 7.330595483 | AST.resultn   | <       | 72.5         | 0.002280805  | 1546 |
| Sodium.resultn | <  | 140.5       | psc.yrs.dur   | <  | 7.330595483 | AST.resultn   | >=      | 72.5         | 0            | 1546 |
| Sodium.resultn | <  | 140.5       | psc.yrs.dur   | >= | 7.330595483 |               | Missing |              | 0.003460631  | 1546 |
| Sodium.resultn | >= | 140.5       |               |    |             |               | Missing |              | 0.000206161  | 1546 |
| ALB.resultn    | =  | Missing     |               |    |             |               | Missing |              | -6.44E-05    | 1547 |
| ALB.resultn    | <  | 2.965       |               |    |             |               | Missing |              | 0.003173302  | 1547 |
| ALB.resultn    | >= | 2.965       | TBILL.resultn | =  | Missing     |               | Missing |              | 0.000260433  | 1547 |
| ALB.resultn    | >= | 2.965       | TBILL.resultn | <  | 2.2         |               | Missing |              | 0.000165977  | 1547 |
| ALB.resultn    | >= | 2.965       | TBILL.resultn | >= | 2.2         | PLT.resultn   | =       | Missing      | 0.00111954   | 1547 |
| ALB.resultn    | >= | 2.965       | TBILL.resultn | >= | 2.2         | PLT.resultn   | <       | 234.5        | 0.002239079  | 1547 |
| ALB.resultn    | >= | 2.965       | TBILL.resultn | >= | 2.2         | PLT.resultn   | >=      | 234.5        | 0            | 1547 |
| age.yrs        | =  | Missing     |               |    |             |               | Missing |              | -0.002503798 | 1548 |
| age.yrs        | <  | 48.89390828 |               |    |             |               | Missing |              | -0.002741218 | 1548 |
| age.yrs        | >= | 48.89390828 | psc.yrs.dur   | =  | Missing     |               | Missing |              | -0.002106432 | 1548 |
| age.yrs        | >= | 48.89390828 | psc.yrs.dur   | <  | 0.472279261 |               | Missing |              | -0.003124693 | 1548 |
| age.yrs        | >= | 48.89390828 | psc.yrs.dur   | >= | 0.472279261 | AST.resultn   | =       | Missing      | -0.001189998 | 1548 |
| age.yrs        | >= | 48.89390828 | psc.yrs.dur   | >= | 0.472279261 | AST.resultn   | <       | 64           | -0.002010686 | 1548 |
| age.yrs        | >= | 48.89390828 | psc.yrs.dur   | >= | 0.472279261 | AST.resultn   | >=      | 64           | 0            | 1548 |
| PLT.resultn    | =  | Missing     |               |    |             |               | Missing |              | -1.89E-05    | 1549 |
| PLT.resultn    | <  | 185.5       |               |    |             |               | Missing |              | 0.002822138  | 1549 |
| PLT.resultn    | >= | 185.5       | psc.yrs.dur   | =  | Missing     |               | Missing |              | 0.000699389  | 1549 |
| PLT.resultn    | >= | 185.5       | psc.yrs.dur   | <  | 7.404517454 |               | Missing |              | 0.000562955  | 1549 |
| PLT.resultn    | >= | 185.5       | psc.yrs.dur   | >= | 7.404517454 | psc.yrs.dur   | =       | Missing      | 0.001603899  | 1549 |
| PLT.resultn    | >= | 185.5       | psc.yrs.dur   | >= | 7.404517454 | psc.yrs.dur   | <       | 9.876796715  | 0.003608774  | 1549 |
| PLT.resultn    | >= | 185.5       | psc.yrs.dur   | >= | 7.404517454 | psc.yrs.dur   | >=      | 9.876796715  | 0            | 1549 |
| age.yrs        | =  | Missing     |               |    |             |               | Missing |              | 3.63E-05     | 1550 |
| age.yrs        | <  | 69.84257358 | ALK.times.uln | =  | Missing     |               | Missing |              | -6.17E-05    | 1550 |
| age.yrs        | <  | 69.84257358 | ALK.times.uln | <  | 5.963877551 |               | Missing |              | -0.000200595 | 1550 |
| age.yrs        | <  | 69.84257358 | ALK.times.uln | >= | 5.963877551 | ALK.times.uln | =       | Missing      | 0.000781549  | 1550 |
| age.yrs        | <  | 69.84257358 | ALK.times.uln | >= | 5.963877551 | ALK.times.uln | <       | 7.72173913   | 0.001492048  | 1550 |
| age.yrs        | <  | 69.84257358 | ALK.times.uln | >= | 5.963877551 | ALK.times.uln | >=      | 7.72173913   | 0            | 1550 |



|                |    |                                |    |             |               |         |              |              |      |
|----------------|----|--------------------------------|----|-------------|---------------|---------|--------------|--------------|------|
| age.yrs        | >= | 69.84257358                    |    |             |               | Missing | 0.002636959  | 1550         |      |
| psc.yrs.dur    | =  | Missing                        |    |             |               |         | -0.00024     | 1551         |      |
| psc.yrs.dur    | <  | 8.026009582 Hemoglobin.resultn | =  | Missing     |               |         | 0            | 1551         |      |
| psc.yrs.dur    | <  | 8.026009582 Hemoglobin.resultn | <  | 12.35       |               |         | -0.000846295 | 1551         |      |
| psc.yrs.dur    | <  | 8.026009582 Hemoglobin.resultn | >= | 12.35       |               |         | -0.000410361 | 1551         |      |
| psc.yrs.dur    | >= | 8.026009582 AST.resultn        | =  | Missing     |               |         | 0.000949923  | 1551         |      |
| psc.yrs.dur    | >= | 8.026009582 AST.resultn        | <  | 42          |               |         | -0.001193195 | 1551         |      |
| psc.yrs.dur    | >= | 8.026009582 AST.resultn        | >= | 42          |               |         | 0.002664418  | 1551         |      |
| age.yrs        | =  | Missing                        |    |             |               |         | 0.001106064  | 1552         |      |
| age.yrs        | <  | 60.46132786 TBILI.resultn      | =  | Missing     |               |         | 0            | 1552         |      |
| age.yrs        | <  | 60.46132786 TBILI.resultn      | <  | 3.15        |               |         | 0.000885415  | 1552         |      |
| age.yrs        | <  | 60.46132786 TBILI.resultn      | >= | 3.15        |               |         | 0.000538434  | 1552         |      |
| age.yrs        | >= | 60.46132786 AST.resultn        | =  | Missing     |               |         | 0.002784547  | 1552         |      |
| age.yrs        | >= | 60.46132786 AST.resultn        | <  | 51.5        |               |         | 7.76E-05     | 1552         |      |
| age.yrs        | >= | 60.46132786 AST.resultn        | >= | 51.5        |               |         | 0.006393804  | 1552         |      |
| AST.resultn    | =  | Missing                        |    |             |               | Missing | -0.003463171 | 1553         |      |
| AST.resultn    | <  | 141.5 ALK.times.uln            | =  | Missing     | TBILI.resultn | =       | Missing      | -0.002157894 | 1553 |
| AST.resultn    | <  | 141.5 ALK.times.uln            | =  | Missing     | TBILI.resultn | <       | 0.75         | -0.003468044 | 1553 |
| AST.resultn    | <  | 141.5 ALK.times.uln            | =  | Missing     | TBILI.resultn | >=      | 0.75         | 0            | 1553 |
| AST.resultn    | <  | 141.5 ALK.times.uln            | <  | 5.446215139 |               | Missing | -0.002574439 | 1553         |      |
| AST.resultn    | <  | 141.5 ALK.times.uln            | >= | 5.446215139 |               | Missing | -0.001087649 | 1553         |      |
| AST.resultn    | >= | 141.5                          |    |             |               | Missing | -0.003030447 | 1553         |      |
| psc.yrs.dur    | =  | Missing                        |    |             |               |         | -0.000666173 | 1554         |      |
| psc.yrs.dur    | <  | 0.004106776 Hemoglobin.resultn | =  | Missing     |               |         | 0.00163246   | 1554         |      |
| psc.yrs.dur    | <  | 0.004106776 Hemoglobin.resultn | <  | 13.4        |               |         | 0.005834087  | 1554         |      |
| psc.yrs.dur    | <  | 0.004106776 Hemoglobin.resultn | >= | 13.4        |               |         | -0.00159956  | 1554         |      |
| psc.yrs.dur    | >= | 0.004106776 psc.yrs.dur        | =  | Missing     |               |         | -0.000962441 | 1554         |      |
| psc.yrs.dur    | >= | 0.004106776 psc.yrs.dur        | <  | 2.043805613 |               |         | -0.001463171 | 1554         |      |
| psc.yrs.dur    | >= | 0.004106776 psc.yrs.dur        | >= | 2.043805613 |               |         | 0            | 1554         |      |
| PLT.resultn    | =  | Missing                        |    |             |               |         | -0.000971041 | 1555         |      |
| PLT.resultn    | <  | 197.5 TBILI.resultn            | =  | Missing     |               |         | 0.000431791  | 1555         |      |
| PLT.resultn    | <  | 197.5 TBILI.resultn            | <  | 1.55        |               |         | -0.000543935 | 1555         |      |
| PLT.resultn    | <  | 197.5 TBILI.resultn            | >= | 1.55        |               |         | 0.002383244  | 1555         |      |
| PLT.resultn    | >= | 197.5 ALK.times.uln            | =  | Missing     |               |         | 0            | 1555         |      |
| PLT.resultn    | >= | 197.5 ALK.times.uln            | <  | 6.291692182 |               |         | -0.000814785 | 1555         |      |
| PLT.resultn    | >= | 197.5 ALK.times.uln            | >= | 6.291692182 |               |         | -0.001007251 | 1555         |      |
| ALB.resultn    | =  | Missing                        |    |             |               |         | -0.000482739 | 1556         |      |
| ALB.resultn    | <  | 3.31 PLT.resultn               | =  | Missing     |               |         | 0.001056029  | 1556         |      |
| ALB.resultn    | <  | 3.31 PLT.resultn               | <  | 251.5       |               |         | 0.002221911  | 1556         |      |
| ALB.resultn    | <  | 3.31 PLT.resultn               | >= | 251.5       |               |         | 0.000370216  | 1556         |      |
| ALB.resultn    | >= | 3.31 TBILI.resultn             | =  | Missing     |               |         | 0.000444235  | 1556         |      |
| ALB.resultn    | >= | 3.31 TBILI.resultn             | <  | 2.75        |               |         | 0.000467991  | 1556         |      |
| ALB.resultn    | >= | 3.31 TBILI.resultn             | >= | 2.75        |               |         | 0            | 1556         |      |
| ALB.resultn    | =  | Missing psc.yrs.dur            | =  | Missing     |               |         | 0.001736136  | 1557         |      |
| ALB.resultn    | =  | Missing psc.yrs.dur            | <  | 0.255989049 |               |         | 0.003993113  | 1557         |      |
| ALB.resultn    | =  | Missing psc.yrs.dur            | >= | 0.255989049 |               |         | 0            | 1557         |      |
| ALB.resultn    | <  | 3.03                           |    |             |               |         | 0.002387513  | 1557         |      |
| ALB.resultn    | >= | 3.03 ALB.resultn               | =  | Missing     |               |         | 0.000863704  | 1557         |      |
| ALB.resultn    | >= | 3.03 ALB.resultn               | <  | 3.295       |               |         | 0.000473192  | 1557         |      |
| ALB.resultn    | >= | 3.03 ALB.resultn               | >= | 3.295       |               |         | 0.000882212  | 1557         |      |
| ALK.times.uln  | =  | Missing ALB.resultn            | =  | Missing     |               |         | -0.001415414 | 1558         |      |
| ALK.times.uln  | =  | Missing ALB.resultn            | <  | 3.7         |               |         | 0.002452438  | 1558         |      |
| ALK.times.uln  | =  | Missing ALB.resultn            | >= | 3.7         |               |         | -0.000727665 | 1558         |      |
| ALK.times.uln  | <  | 6.02 ALB.resultn               | =  | Missing     |               |         | 0            | 1558         |      |
| ALK.times.uln  | <  | 6.02 ALB.resultn               | <  | 3.595       |               |         | -0.001457804 | 1558         |      |
| ALK.times.uln  | <  | 6.02 ALB.resultn               | >= | 3.595       |               |         | -0.000692096 | 1558         |      |
| ALK.times.uln  | >= | 6.02                           |    |             |               |         | 0.000284641  | 1558         |      |
| Sodium.resultn | =  | Missing                        |    |             |               | Missing | -0.001758542 | 1559         |      |
| Sodium.resultn | <  | 136.5                          |    |             |               | Missing | 6.71E-05     | 1559         |      |
| Sodium.resultn | >= | 136.5 Hemoglobin.resultn       | =  | Missing     | psc.yrs.dur   | =       | Missing      | -0.001203302 | 1559 |
| Sodium.resultn | >= | 136.5 Hemoglobin.resultn       | =  | Missing     | psc.yrs.dur   | <       | 0.431211499  | -0.002326385 | 1559 |
| Sodium.resultn | >= | 136.5 Hemoglobin.resultn       | =  | Missing     | psc.yrs.dur   | >=      | 0.431211499  | 0            | 1559 |

|                    |    |             |                    |    |             |               |              |             |              |      |
|--------------------|----|-------------|--------------------|----|-------------|---------------|--------------|-------------|--------------|------|
| Sodium.resultn     | >= | 136.5       | Hemoglobin.resultn | <  | 11.75       | Missing       | -0.001853034 | 1559        |              |      |
| Sodium.resultn     | >= | 136.5       | Hemoglobin.resultn | >= | 11.75       | Missing       | -0.000961103 | 1559        |              |      |
| psc.yrs.dur        | =  | Missing     |                    |    |             | Missing       | -0.002897949 | 1560        |              |      |
| psc.yrs.dur        | <  | 6.262833676 |                    |    |             | Missing       | -0.003092347 | 1560        |              |      |
| psc.yrs.dur        | >= | 6.262833676 | ALB.resultn        | =  | Missing     | Missing       | -0.001944039 | 1560        |              |      |
| psc.yrs.dur        | >= | 6.262833676 | ALB.resultn        | <  | 3.35        | Missing       | -0.000402857 | 1560        |              |      |
| psc.yrs.dur        | >= | 6.262833676 | ALB.resultn        | >= | 3.35        | age.yrs       | =            | Missing     | -0.002494461 | 1560 |
| psc.yrs.dur        | >= | 6.262833676 | ALB.resultn        | >= | 3.35        | age.yrs       | <            | 51.76180698 | -0.003880273 | 1560 |
| psc.yrs.dur        | >= | 6.262833676 | ALB.resultn        | >= | 3.35        | age.yrs       | >=           | 51.76180698 | 0            | 1560 |
| Hemoglobin.resultn | =  | Missing     | TBILI.resultn      | =  | Missing     |               |              | 0.000946302 | 1561         |      |
| Hemoglobin.resultn | =  | Missing     | TBILI.resultn      | <  | 0.75        |               |              | -3.56E-05   | 1561         |      |
| Hemoglobin.resultn | =  | Missing     | TBILI.resultn      | >= | 0.75        |               |              | 0.002463837 | 1561         |      |
| Hemoglobin.resultn | <  | 12.35       |                    |    |             |               |              | 0.000306768 | 1561         |      |
| Hemoglobin.resultn | >= | 12.35       | ALK.times.uln      | =  | Missing     |               |              | 0           | 1561         |      |
| Hemoglobin.resultn | >= | 12.35       | ALK.times.uln      | <  | 5.406407841 |               |              | 0.000841571 | 1561         |      |
| Hemoglobin.resultn | >= | 12.35       | ALK.times.uln      | >= | 5.406407841 |               |              | 0.001998762 | 1561         |      |
| Sodium.resultn     | =  | Missing     |                    |    |             | Missing       | -0.001728407 | 1562        |              |      |
| Sodium.resultn     | <  | 140.5       | psc.yrs.dur        | =  | Missing     | Missing       | -0.001495779 | 1562        |              |      |
| Sodium.resultn     | <  | 140.5       | psc.yrs.dur        | <  | 1.232032854 | Missing       | -0.001886467 | 1562        |              |      |
| Sodium.resultn     | <  | 140.5       | psc.yrs.dur        | >= | 1.232032854 | AST.resultn   | =            | Missing     | -0.000878904 | 1562 |
| Sodium.resultn     | <  | 140.5       | psc.yrs.dur        | >= | 1.232032854 | AST.resultn   | <            | 43          | -0.002709953 | 1562 |
| Sodium.resultn     | <  | 140.5       | psc.yrs.dur        | >= | 1.232032854 | AST.resultn   | >=           | 43          | 0            | 1562 |
| Sodium.resultn     | >= | 140.5       |                    |    |             | Missing       | -0.002388474 | 1562        |              |      |
| PLT.resultn        | =  | Missing     |                    |    |             | Missing       | 0.000359495  | 1563        |              |      |
| PLT.resultn        | <  | 171.5       |                    |    |             | Missing       | 0.002091277  | 1563        |              |      |
| PLT.resultn        | >= | 171.5       | Hemoglobin.resultn | =  | Missing     | ALB.resultn   | =            | Missing     | 0.000695282  | 1563 |
| PLT.resultn        | >= | 171.5       | Hemoglobin.resultn | =  | Missing     | ALB.resultn   | <            | 4.05        | 0.001711464  | 1563 |
| PLT.resultn        | >= | 171.5       | Hemoglobin.resultn | =  | Missing     | ALB.resultn   | >=           | 4.05        | 0            | 1563 |
| PLT.resultn        | >= | 171.5       | Hemoglobin.resultn | <  | 12.85       | Missing       | -0.000914613 | 1563        |              |      |
| PLT.resultn        | >= | 171.5       | Hemoglobin.resultn | >= | 12.85       | Missing       | -0.000566021 | 1563        |              |      |
| ALB.resultn        | =  | Missing     |                    |    |             | Missing       | -0.002381926 | 1564        |              |      |
| ALB.resultn        | <  | 2.965       |                    |    |             | Missing       | 0.000232746  | 1564        |              |      |
| ALB.resultn        | >= | 2.965       | TBILI.resultn      | =  | Missing     | Missing       | -0.001727279 | 1564        |              |      |
| ALB.resultn        | >= | 2.965       | TBILI.resultn      | <  | 2.6         | psc.yrs.dur   | =            | Missing     | -0.001721835 | 1564 |
| ALB.resultn        | >= | 2.965       | TBILI.resultn      | <  | 2.6         | psc.yrs.dur   | <            | 6.324435318 | -0.001979121 | 1564 |
| ALB.resultn        | >= | 2.965       | TBILI.resultn      | <  | 2.6         | psc.yrs.dur   | >=           | 6.324435318 | 0            | 1564 |
| ALB.resultn        | >= | 2.965       | TBILI.resultn      | >= | 2.6         | Missing       | -0.001784578 | 1564        |              |      |
| PLT.resultn        | =  | Missing     |                    |    |             | Missing       | -0.001470078 | 1565        |              |      |
| PLT.resultn        | <  | 249.5       | AST.resultn        | =  | Missing     | Missing       | -0.001671056 | 1565        |              |      |
| PLT.resultn        | <  | 249.5       | AST.resultn        | <  | 52.5        | Missing       | -0.002579795 | 1565        |              |      |
| PLT.resultn        | <  | 249.5       | AST.resultn        | >= | 52.5        | age.yrs       | =            | Missing     | -0.001013004 | 1565 |
| PLT.resultn        | <  | 249.5       | AST.resultn        | >= | 52.5        | age.yrs       | <            | 51.58521561 | -0.001678692 | 1565 |
| PLT.resultn        | <  | 249.5       | AST.resultn        | >= | 52.5        | age.yrs       | >=           | 51.58521561 | 0            | 1565 |
| PLT.resultn        | >= | 249.5       |                    |    |             | Missing       | -0.00211663  | 1565        |              |      |
| psc.yrs.dur        | =  | Missing     |                    |    |             | Missing       | -0.000773443 | 1566        |              |      |
| psc.yrs.dur        | <  | 6.258726899 |                    |    |             | Missing       | -0.000875752 | 1566        |              |      |
| psc.yrs.dur        | >= | 6.258726899 | AST.resultn        | =  | Missing     | Missing       | -0.000173412 | 1566        |              |      |
| psc.yrs.dur        | >= | 6.258726899 | AST.resultn        | <  | 44.5        | Missing       | -0.001588611 | 1566        |              |      |
| psc.yrs.dur        | >= | 6.258726899 | AST.resultn        | >= | 44.5        | psc.yrs.dur   | =            | Missing     | 0.000958748  | 1566 |
| psc.yrs.dur        | >= | 6.258726899 | AST.resultn        | >= | 44.5        | psc.yrs.dur   | <            | 10.04654346 | 0.001917496  | 1566 |
| psc.yrs.dur        | >= | 6.258726899 | AST.resultn        | >= | 44.5        | psc.yrs.dur   | >=           | 10.04654346 | 0            | 1566 |
| ALB.resultn        | =  | Missing     |                    |    |             | Missing       | -0.000744797 | 1567        |              |      |
| ALB.resultn        | <  | 3.75        | PLT.resultn        | =  | Missing     | Missing       | -0.000630015 | 1567        |              |      |
| ALB.resultn        | <  | 3.75        | PLT.resultn        | <  | 218         | Missing       | 0.000898821  | 1567        |              |      |
| ALB.resultn        | <  | 3.75        | PLT.resultn        | >= | 218         | ALK.times.uln | =            | Missing     | -0.00115121  | 1567 |
| ALB.resultn        | <  | 3.75        | PLT.resultn        | >= | 218         | ALK.times.uln | <            | 5.776048866 | -0.001620221 | 1567 |
| ALB.resultn        | <  | 3.75        | PLT.resultn        | >= | 218         | ALK.times.uln | >=           | 5.776048866 | 0            | 1567 |
| ALB.resultn        | >= | 3.75        |                    |    |             | Missing       | -0.00128616  | 1567        |              |      |
| AST.resultn        | =  | Missing     |                    |    |             | Missing       | -0.002991597 | 1568        |              |      |
| AST.resultn        | <  | 126.5       | ALK.times.uln      | =  | Missing     | TBILI.resultn | =            | Missing     | -0.001877112 | 1568 |
| AST.resultn        | <  | 126.5       | ALK.times.uln      | =  | Missing     | TBILI.resultn | <            | 1.15        | -0.002429203 | 1568 |
| AST.resultn        | <  | 126.5       | ALK.times.uln      | =  | Missing     | TBILI.resultn | >=           | 1.15        | 0            | 1568 |

|                |    |             |                    |    |             |               |              |             |              |      |
|----------------|----|-------------|--------------------|----|-------------|---------------|--------------|-------------|--------------|------|
| AST.resultn    | <  | 126.5       | ALK.times.uln      | <  | 5.438574341 | Missing       | -0.002190288 | 1568        |              |      |
| AST.resultn    | <  | 126.5       | ALK.times.uln      | >= | 5.438574341 | Missing       | -0.000698317 | 1568        |              |      |
| AST.resultn    | >= | 126.5       |                    |    |             | Missing       | -0.002614479 | 1568        |              |      |
| age.yrs        | =  | Missing     |                    |    |             | Missing       | -0.001588343 | 1569        |              |      |
| age.yrs        | <  | 68.52156057 | PLT.resultn        | =  | Missing     | Missing       | -0.001853005 | 1569        |              |      |
| age.yrs        | <  | 68.52156057 | PLT.resultn        | <  | 185.5       | Missing       | -0.000438101 | 1569        |              |      |
| age.yrs        | <  | 68.52156057 | PLT.resultn        | >= | 185.5       | TBILI.resultn | =            | Missing     | 0            | 1569 |
| age.yrs        | <  | 68.52156057 | PLT.resultn        | >= | 185.5       | TBILI.resultn | <            | 1.15        | -0.001932386 | 1569 |
| age.yrs        | <  | 68.52156057 | PLT.resultn        | >= | 185.5       | TBILI.resultn | >=           | 1.15        | -0.00208179  | 1569 |
| age.yrs        | >= | 68.52156057 |                    |    |             | Missing       | 0.00272499   | 1569        |              |      |
| Sodium.resultn | =  | Missing     | TBILI.resultn      | =  | Missing     |               | -0.001306655 | 1570        |              |      |
| Sodium.resultn | =  | Missing     | TBILI.resultn      | <  | 1.31        |               | -0.001637746 | 1570        |              |      |
| Sodium.resultn | =  | Missing     | TBILI.resultn      | >= | 1.31        |               | 0.00070999   | 1570        |              |      |
| Sodium.resultn | <  | 136.5       |                    |    |             |               | 0.000797326  | 1570        |              |      |
| Sodium.resultn | >= | 136.5       | Hemoglobin.resultn | =  | Missing     |               | 0            | 1570        |              |      |
| Sodium.resultn | >= | 136.5       | Hemoglobin.resultn | <  | 11.75       |               | -0.001224058 | 1570        |              |      |
| Sodium.resultn | >= | 136.5       | Hemoglobin.resultn | >= | 11.75       |               | -0.001069533 | 1570        |              |      |
| ALB.resultn    | =  | Missing     |                    |    |             | Missing       | -0.002878017 | 1571        |              |      |
| ALB.resultn    | <  | 2.915       |                    |    |             | Missing       | -0.000394436 | 1571        |              |      |
| ALB.resultn    | >= | 2.915       | psc.yrs.dur        | =  | Missing     | Missing       | -0.002246296 | 1571        |              |      |
| ALB.resultn    | >= | 2.915       | psc.yrs.dur        | <  | 6.324435318 | Missing       | -0.002327105 | 1571        |              |      |
| ALB.resultn    | >= | 2.915       | psc.yrs.dur        | >= | 6.324435318 | AST.resultn   | =            | Missing     | -0.001692607 | 1571 |
| ALB.resultn    | >= | 2.915       | psc.yrs.dur        | >= | 6.324435318 | AST.resultn   | <            | 54          | -0.002856274 | 1571 |
| ALB.resultn    | >= | 2.915       | psc.yrs.dur        | >= | 6.324435318 | AST.resultn   | >=           | 54          | 0            | 1571 |
| ALK.times.uln  | =  | Missing     | age.yrs            | =  | Missing     | Missing       | -0.000369779 | 1572        |              |      |
| ALK.times.uln  | =  | Missing     | age.yrs            | <  | 51.31416838 | Missing       | -0.001442794 | 1572        |              |      |
| ALK.times.uln  | =  | Missing     | age.yrs            | >= | 51.31416838 | age.yrs       | =            | Missing     | 0.001825024  | 1572 |
| ALK.times.uln  | =  | Missing     | age.yrs            | >= | 51.31416838 | age.yrs       | <            | 55.08008214 | 0.003650047  | 1572 |
| ALK.times.uln  | =  | Missing     | age.yrs            | >= | 51.31416838 | age.yrs       | >=           | 55.08008214 | 0            | 1572 |
| ALK.times.uln  | <  | 5.438574341 |                    |    |             | Missing       | -0.001007927 | 1572        |              |      |
| ALK.times.uln  | >= | 5.438574341 |                    |    |             | Missing       | 0.000366298  | 1572        |              |      |
| psc.yrs.dur    | =  | Missing     |                    |    |             |               | 0.00060571   | 1573        |              |      |
| psc.yrs.dur    | <  | 1.362080767 | TBILI.resultn      | =  | Missing     |               | 0.000243247  | 1573        |              |      |
| psc.yrs.dur    | <  | 1.362080767 | TBILI.resultn      | <  | 2.8         |               | 0.000260257  | 1573        |              |      |
| psc.yrs.dur    | <  | 1.362080767 | TBILI.resultn      | >= | 2.8         |               | 0            | 1573        |              |      |
| psc.yrs.dur    | >= | 1.362080767 | Sodium.resultn     | =  | Missing     |               | 0.000667299  | 1573        |              |      |
| psc.yrs.dur    | >= | 1.362080767 | Sodium.resultn     | <  | 138.5       |               | 0.003039989  | 1573        |              |      |
| psc.yrs.dur    | >= | 1.362080767 | Sodium.resultn     | >= | 138.5       |               | 0.000907866  | 1573        |              |      |
| TBILI.resultn  | =  | Missing     |                    |    |             |               | -0.003406941 | 1574        |              |      |
| TBILI.resultn  | <  | 1.65        | age.yrs            | =  | Missing     |               | -0.002794764 | 1574        |              |      |
| TBILI.resultn  | <  | 1.65        | age.yrs            | <  | 64.89253936 |               | -0.003071169 | 1574        |              |      |
| TBILI.resultn  | <  | 1.65        | age.yrs            | >= | 64.89253936 |               | 0            | 1574        |              |      |
| TBILI.resultn  | >= | 1.65        | Hemoglobin.resultn | =  | Missing     |               | -0.002052958 | 1574        |              |      |
| TBILI.resultn  | >= | 1.65        | Hemoglobin.resultn | <  | 12.9        |               | -0.001723742 | 1574        |              |      |
| TBILI.resultn  | >= | 1.65        | Hemoglobin.resultn | >= | 12.9        |               | -0.002304712 | 1574        |              |      |
| AST.resultn    | =  | Missing     |                    |    |             | Missing       | -0.003321564 | 1575        |              |      |
| AST.resultn    | <  | 133.5       | TBILI.resultn      | =  | Missing     | Missing       | -0.002293012 | 1575        |              |      |
| AST.resultn    | <  | 133.5       | TBILI.resultn      | <  | 1.65        | Missing       | -0.002378839 | 1575        |              |      |
| AST.resultn    | <  | 133.5       | TBILI.resultn      | >= | 1.65        | age.yrs       | =            | Missing     | -0.001024351 | 1575 |
| AST.resultn    | <  | 133.5       | TBILI.resultn      | >= | 1.65        | age.yrs       | <            | 47.4880219  | -0.002048702 | 1575 |
| AST.resultn    | <  | 133.5       | TBILI.resultn      | >= | 1.65        | age.yrs       | >=           | 47.4880219  | 0            | 1575 |
| AST.resultn    | >= | 133.5       |                    |    |             | Missing       | -0.002923759 | 1575        |              |      |
| ALB.resultn    | =  | Missing     |                    |    |             | Missing       | -0.003104953 | 1576        |              |      |
| ALB.resultn    | <  | 2.915       |                    |    |             | Missing       | -0.001301137 | 1576        |              |      |
| ALB.resultn    | >= | 2.915       | age.yrs            | =  | Missing     | Missing       | -0.002523563 | 1576        |              |      |
| ALB.resultn    | >= | 2.915       | age.yrs            | <  | 53.46475017 | Missing       | -0.002757976 | 1576        |              |      |
| ALB.resultn    | >= | 2.915       | age.yrs            | >= | 53.46475017 | AST.resultn   | =            | Missing     | -0.001976601 | 1576 |
| ALB.resultn    | >= | 2.915       | age.yrs            | >= | 53.46475017 | AST.resultn   | <            | 64          | -0.003106088 | 1576 |
| ALB.resultn    | >= | 2.915       | age.yrs            | >= | 53.46475017 | AST.resultn   | >=           | 64          | 0            | 1576 |
| age.yrs        | =  | Missing     |                    |    |             | Missing       | -0.004183964 | 1577        |              |      |
| age.yrs        | <  | 53.64681725 |                    |    |             | Missing       | -0.004378174 | 1577        |              |      |
| age.yrs        | >= | 53.64681725 | AST.resultn        | =  | Missing     | Missing       | -0.00361926  | 1577        |              |      |

|                |    |                                |               |                            |             |              |              |              |      |
|----------------|----|--------------------------------|---------------|----------------------------|-------------|--------------|--------------|--------------|------|
| age.yrs        | >= | 53.64681725 AST.resultn        | <             | 51.5                       | Missing     | -0.004951819 | 1577         |              |      |
| age.yrs        | >= | 53.64681725 AST.resultn        | >=            | 51.5 psc.yrs.dur           | =           | Missing      | -0.0022867   | 1577         |      |
| age.yrs        | >= | 53.64681725 AST.resultn        | >=            | 51.5 psc.yrs.dur           | <           | 0.725530459  | -0.003326109 | 1577         |      |
| age.yrs        | >= | 53.64681725 AST.resultn        | >=            | 51.5 psc.yrs.dur           | >=          | 0.725530459  | 0            | 1577         |      |
| psc.yrs.dur    | =  | Missing                        |               |                            |             | Missing      | -0.001111378 | 1578         |      |
| psc.yrs.dur    | <  | 14.96372348 Hemoglobin.resultn | =             | Missing                    |             | Missing      | -0.000818927 | 1578         |      |
| psc.yrs.dur    | <  | 14.96372348 Hemoglobin.resultn | <             | 13.75 ALK.times.uln        | =           | Missing      | -0.00088538  | 1578         |      |
| psc.yrs.dur    | <  | 14.96372348 Hemoglobin.resultn | <             | 13.75 ALK.times.uln        | <           | 2.905037968  | -0.001360861 | 1578         |      |
| psc.yrs.dur    | <  | 14.96372348 Hemoglobin.resultn | <             | 13.75 ALK.times.uln        | >=          | 2.905037968  | 0            | 1578         |      |
| psc.yrs.dur    | <  | 14.96372348 Hemoglobin.resultn | >=            | 13.75                      |             | Missing      | -0.001914173 | 1578         |      |
| psc.yrs.dur    | >= | 14.96372348                    |               |                            |             | Missing      | 0.002646209  | 1578         |      |
| age.yrs        | =  | Missing                        |               |                            |             | Missing      | 3.10E-05     | 1579         |      |
| age.yrs        | <  | 69.84257358 psc.yrs.dur        | =             | Missing                    |             | Missing      | -0.000138173 | 1579         |      |
| age.yrs        | <  | 69.84257358 psc.yrs.dur        | <             | 1.961670089                |             | Missing      | -0.000398791 | 1579         |      |
| age.yrs        | <  | 69.84257358 psc.yrs.dur        | >=            | 1.961670089 Sodium.resultn | =           | Missing      | 0            | 1579         |      |
| age.yrs        | <  | 69.84257358 psc.yrs.dur        | >=            | 1.961670089 Sodium.resultn | <           | 138.5        | 0.001600742  | 1579         |      |
| age.yrs        | <  | 69.84257358 psc.yrs.dur        | >=            | 1.961670089 Sodium.resultn | >=          | 138.5        | 8.91E-05     | 1579         |      |
| age.yrs        | >= | 69.84257358                    |               |                            |             | Missing      | 0.002727142  | 1579         |      |
| age.yrs        | =  | Missing                        |               |                            |             | Missing      | -0.001773412 | 1580         |      |
| age.yrs        | <  | 49.03353867                    |               |                            |             | Missing      | -0.001999261 | 1580         |      |
| age.yrs        | >= | 49.03353867 AST.resultn        | =             | Missing                    |             | Missing      | -0.001431285 | 1580         |      |
| age.yrs        | >= | 49.03353867 AST.resultn        | <             | 51.5                       |             | Missing      | -0.002442561 | 1580         |      |
| age.yrs        | >= | 49.03353867 AST.resultn        | >=            | 51.5 psc.yrs.dur           | =           | Missing      | -0.00075129  | 1580         |      |
| age.yrs        | >= | 49.03353867 AST.resultn        | >=            | 51.5 psc.yrs.dur           | <           | 0.465434634  | -0.001556243 | 1580         |      |
| age.yrs        | >= | 49.03353867 AST.resultn        | >=            | 51.5 psc.yrs.dur           | >=          | 0.465434634  | 0            | 1580         |      |
| Sodium.resultn | =  | Missing                        |               |                            |             | Missing      | -0.003604538 | 1581         |      |
| Sodium.resultn | <  | 136.5                          |               |                            |             | Missing      | -0.001814523 | 1581         |      |
| Sodium.resultn | >= | 136.5 ALK.times.uln            | =             | Missing                    | psc.yrs.dur | =            | Missing      | -0.00211815  | 1581 |
| Sodium.resultn | >= | 136.5 ALK.times.uln            | =             | Missing                    | psc.yrs.dur | <            | 0.436687201  | -0.004103915 | 1581 |
| Sodium.resultn | >= | 136.5 ALK.times.uln            | =             | Missing                    | psc.yrs.dur | >=           | 0.436687201  | 0            | 1581 |
| Sodium.resultn | >= | 136.5 ALK.times.uln            | <             | 6.02                       |             | Missing      | -0.004486951 | 1581         |      |
| Sodium.resultn | >= | 136.5 ALK.times.uln            | >=            | 6.02                       |             | Missing      | -0.002618672 | 1581         |      |
| ALK.times.uln  | =  | Missing                        | TBILI.resultn | =                          | Missing     |              | -0.000305717 | 1582         |      |
| ALK.times.uln  | =  | Missing                        | TBILI.resultn | <                          | 1.15        |              | 0.000296351  | 1582         |      |
| ALK.times.uln  | =  | Missing                        | TBILI.resultn | >=                         | 1.15        |              | 0.002196866  | 1582         |      |
| ALK.times.uln  | <  | 5.926121601 TBILI.resultn      | =             | Missing                    |             |              | 9.66E-05     | 1582         |      |
| ALK.times.uln  | <  | 5.926121601 TBILI.resultn      | <             | 1.15                       |             |              | 0.000124169  | 1582         |      |
| ALK.times.uln  | <  | 5.926121601 TBILI.resultn      | >=            | 1.15                       |             |              | 0            | 1582         |      |
| ALK.times.uln  | >= | 5.926121601                    |               |                            |             |              | 0.00151894   | 1582         |      |
| ALB.resultn    | =  | Missing                        |               |                            |             | Missing      | -0.00018571  | 1583         |      |
| ALB.resultn    | <  | 2.95                           |               |                            |             | Missing      | 0.000477417  | 1583         |      |
| ALB.resultn    | >= | 2.95 TBILI.resultn             | =             | Missing                    |             | Missing      | -0.00061508  | 1583         |      |
| ALB.resultn    | >= | 2.95 TBILI.resultn             | <             | 0.75                       |             | Missing      | -0.001334903 | 1583         |      |
| ALB.resultn    | >= | 2.95 TBILI.resultn             | >=            | 0.75 Sodium.resultn        | =           | Missing      | 0            | 1583         |      |
| ALB.resultn    | >= | 2.95 TBILI.resultn             | >=            | 0.75 Sodium.resultn        | <           | 141.5        | 0.000167813  | 1583         |      |
| ALB.resultn    | >= | 2.95 TBILI.resultn             | >=            | 0.75 Sodium.resultn        | >=          | 141.5        | -0.000885882 | 1583         |      |
| ALB.resultn    | =  | Missing                        |               |                            |             | Missing      | -0.004081737 | 1584         |      |
| ALB.resultn    | <  | 2.95                           |               |                            |             | Missing      | -0.00190324  | 1584         |      |
| ALB.resultn    | >= | 2.95 psc.yrs.dur               | =             | Missing                    |             | Missing      | -0.003209132 | 1584         |      |
| ALB.resultn    | >= | 2.95 psc.yrs.dur               | <             | 8.020533881                |             | Missing      | -0.003336285 | 1584         |      |
| ALB.resultn    | >= | 2.95 psc.yrs.dur               | >=            | 8.020533881 TBILI.resultn  | =           | Missing      | -0.002191909 | 1584         |      |
| ALB.resultn    | >= | 2.95 psc.yrs.dur               | >=            | 8.020533881 TBILI.resultn  | <           | 0.95         | -0.004046602 | 1584         |      |
| ALB.resultn    | >= | 2.95 psc.yrs.dur               | >=            | 8.020533881 TBILI.resultn  | >=          | 0.95         | 0            | 1584         |      |
| TBILI.resultn  | =  | Missing                        |               |                            |             | Missing      | -0.002727543 | 1585         |      |
| TBILI.resultn  | <  | 1.15                           |               |                            |             | Missing      | -0.00390832  | 1585         |      |
| TBILI.resultn  | >= | 1.15 Hemoglobin.resultn        | =             | Missing                    |             | Missing      | -0.001915345 | 1585         |      |
| TBILI.resultn  | >= | 1.15 Hemoglobin.resultn        | <             | 13.75 Hemoglobin.resultn   | =           | Missing      | -0.001675702 | 1585         |      |
| TBILI.resultn  | >= | 1.15 Hemoglobin.resultn        | <             | 13.75 Hemoglobin.resultn   | <           | 12.65        | -0.003351403 | 1585         |      |
| TBILI.resultn  | >= | 1.15 Hemoglobin.resultn        | <             | 13.75 Hemoglobin.resultn   | >=          | 12.65        | 0            | 1585         |      |
| TBILI.resultn  | >= | 1.15 Hemoglobin.resultn        | >=            | 13.75                      |             | Missing      | -0.003860475 | 1585         |      |
| psc.yrs.dur    | =  | Missing                        |               |                            |             | Missing      | -9.56E-05    | 1586         |      |
| psc.yrs.dur    | <  | 2.366872005                    |               |                            |             | Missing      | -0.000338308 | 1586         |      |

|                |    |                            |    |                         |    |             |              |      |
|----------------|----|----------------------------|----|-------------------------|----|-------------|--------------|------|
| psc.yrs.dur    | >= | 2.366872005 ALB.resultn    | =  | Missing                 |    | Missing     | 0.000422817  | 1586 |
| psc.yrs.dur    | >= | 2.366872005 ALB.resultn    | <  | 3.35                    |    | Missing     | 0.00162212   | 1586 |
| psc.yrs.dur    | >= | 2.366872005 ALB.resultn    | >= | 3.35 ALK.times.uln      | =  | Missing     | 0            | 1586 |
| psc.yrs.dur    | >= | 2.366872005 ALB.resultn    | >= | 3.35 ALK.times.uln      | <  | 2.615901771 | -0.000964745 | 1586 |
| psc.yrs.dur    | >= | 2.366872005 ALB.resultn    | >= | 3.35 ALK.times.uln      | >= | 2.615901771 | 0.002639965  | 1586 |
| ALK.times.uln  | =  | Missing psc.yrs.dur        | =  | Missing                 |    |             | -0.001923804 | 1587 |
| ALK.times.uln  | =  | Missing psc.yrs.dur        | <  | 6.410677618             |    |             | -0.002462469 | 1587 |
| ALK.times.uln  | =  | Missing psc.yrs.dur        | >= | 6.410677618             |    |             | 0            | 1587 |
| ALK.times.uln  | <  | 2.815208295                |    |                         |    |             | -0.002659353 | 1587 |
| ALK.times.uln  | >= | 2.815208295 PLT.resultn    | =  | Missing                 |    |             | -0.00141296  | 1587 |
| ALK.times.uln  | >= | 2.815208295 PLT.resultn    | <  | 209.5                   |    |             | -0.000204686 | 1587 |
| ALK.times.uln  | >= | 2.815208295 PLT.resultn    | >= | 209.5                   |    |             | -0.001722053 | 1587 |
| psc.yrs.dur    | =  | Missing                    |    |                         |    | Missing     | -0.001968406 | 1588 |
| psc.yrs.dur    | <  | 15.25941136 Sodium.resultn | =  | Missing                 |    | Missing     | -0.001839044 | 1588 |
| psc.yrs.dur    | <  | 15.25941136 Sodium.resultn | <  | 137.5 TBILL.resultn     | =  | Missing     | -0.001351663 | 1588 |
| psc.yrs.dur    | <  | 15.25941136 Sodium.resultn | <  | 137.5 TBILL.resultn     | <  | 0.85        | -0.002911273 | 1588 |
| psc.yrs.dur    | <  | 15.25941136 Sodium.resultn | <  | 137.5 TBILL.resultn     | >= | 0.85        | 0            | 1588 |
| psc.yrs.dur    | <  | 15.25941136 Sodium.resultn | >= | 137.5                   |    | Missing     | -0.002362693 | 1588 |
| psc.yrs.dur    | >= | 15.25941136                |    |                         |    | Missing     | -9.37E-05    | 1588 |
| psc.yrs.dur    | =  | Missing                    |    |                         |    |             | 0.000436119  | 1589 |
| psc.yrs.dur    | <  | 7.823408624 psc.yrs.dur    | =  | Missing                 |    |             | 0.000252116  | 1589 |
| psc.yrs.dur    | <  | 7.823408624 psc.yrs.dur    | <  | 0.004106776             |    |             | 0.002339632  | 1589 |
| psc.yrs.dur    | <  | 7.823408624 psc.yrs.dur    | >= | 0.004106776             |    |             | 0            | 1589 |
| psc.yrs.dur    | >= | 7.823408624 psc.yrs.dur    | =  | Missing                 |    |             | 0.00237652   | 1589 |
| psc.yrs.dur    | >= | 7.823408624 psc.yrs.dur    | <  | 9.863107461             |    |             | 0.005153856  | 1589 |
| psc.yrs.dur    | >= | 7.823408624 psc.yrs.dur    | >= | 9.863107461             |    |             | 6.21E-05     | 1589 |
| ALB.resultn    | =  | Missing                    |    |                         |    |             | 1.12E-05     | 1590 |
| ALB.resultn    | <  | 3.615 ALK.times.uln        | =  | Missing                 |    |             | 0.002391945  | 1590 |
| ALB.resultn    | <  | 3.615 ALK.times.uln        | <  | 5.689103147             |    |             | 0.00052117   | 1590 |
| ALB.resultn    | <  | 3.615 ALK.times.uln        | >= | 5.689103147             |    |             | 0.002860901  | 1590 |
| ALB.resultn    | >= | 3.615 PLT.resultn          | =  | Missing                 |    |             | 0            | 1590 |
| ALB.resultn    | >= | 3.615 PLT.resultn          | <  | 206.5                   |    |             | 0.001830059  | 1590 |
| ALB.resultn    | >= | 3.615 PLT.resultn          | >= | 206.5                   |    |             | 0.00032975   | 1590 |
| TBILL.resultn  | =  | Missing                    |    |                         |    |             | 0.002606057  | 1591 |
| TBILL.resultn  | <  | 1.65 AST.resultn           | =  | Missing                 |    |             | 0.000940909  | 1591 |
| TBILL.resultn  | <  | 1.65 AST.resultn           | <  | 111.5                   |    |             | 0.00113558   | 1591 |
| TBILL.resultn  | <  | 1.65 AST.resultn           | >= | 111.5                   |    |             | 0            | 1591 |
| TBILL.resultn  | >= | 1.65 Hemoglobin.resultn    | =  | Missing                 |    |             | 0.0007156    | 1591 |
| TBILL.resultn  | >= | 1.65 Hemoglobin.resultn    | <  | 13.15                   |    |             | 0.001639908  | 1591 |
| TBILL.resultn  | >= | 1.65 Hemoglobin.resultn    | >= | 13.15                   |    |             | 4.59E-06     | 1591 |
| TBILL.resultn  | =  | Missing                    |    |                         |    | Missing     | -0.000913414 | 1592 |
| TBILL.resultn  | <  | 0.85                       |    |                         |    | Missing     | -0.003090816 | 1592 |
| TBILL.resultn  | >= | 0.85 age.yrs               | =  | Missing                 |    | Missing     | -0.002089713 | 1592 |
| TBILL.resultn  | >= | 0.85 age.yrs               | <  | 53.64681725             |    | Missing     | -0.002459544 | 1592 |
| TBILL.resultn  | >= | 0.85 age.yrs               | >= | 53.64681725 psc.yrs.dur | =  | Missing     | -0.001103496 | 1592 |
| TBILL.resultn  | >= | 0.85 age.yrs               | >= | 53.64681725 psc.yrs.dur | <  | 0.73100616  | -0.002069056 | 1592 |
| TBILL.resultn  | >= | 0.85 age.yrs               | >= | 53.64681725 psc.yrs.dur | >= | 0.73100616  | 0            | 1592 |
| TBILL.resultn  | =  | Missing                    |    |                         |    | Missing     | -0.001424686 | 1593 |
| TBILL.resultn  | <  | 0.85                       |    |                         |    | Missing     | -0.001253086 | 1593 |
| TBILL.resultn  | >= | 0.85 ALB.resultn           | =  | Missing                 |    | Missing     | 0.000456937  | 1593 |
| TBILL.resultn  | >= | 0.85 ALB.resultn           | <  | 4.255 Sodium.resultn    | =  | Missing     | 0            | 1593 |
| TBILL.resultn  | >= | 0.85 ALB.resultn           | <  | 4.255 Sodium.resultn    | <  | 138.5       | 0.000750501  | 1593 |
| TBILL.resultn  | >= | 0.85 ALB.resultn           | <  | 4.255 Sodium.resultn    | >= | 138.5       | -0.0007094   | 1593 |
| TBILL.resultn  | >= | 0.85 ALB.resultn           | >= | 4.255                   |    | Missing     | 0.001942128  | 1593 |
| psc.yrs.dur    | =  | Missing                    |    |                         |    |             | 0.000483485  | 1594 |
| psc.yrs.dur    | <  | 7.314168378 TBILL.resultn  | =  | Missing                 |    |             | 0.000345432  | 1594 |
| psc.yrs.dur    | <  | 7.314168378 TBILL.resultn  | <  | 2.65                    |    |             | 0.000375763  | 1594 |
| psc.yrs.dur    | <  | 7.314168378 TBILL.resultn  | >= | 2.65                    |    |             | 0            | 1594 |
| psc.yrs.dur    | >= | 7.314168378 age.yrs        | =  | Missing                 |    |             | 0.001939312  | 1594 |
| psc.yrs.dur    | >= | 7.314168378 age.yrs        | <  | 51.58521561             |    |             | 0.000430062  | 1594 |
| psc.yrs.dur    | >= | 7.314168378 age.yrs        | >= | 51.58521561             |    |             | 0.003750413  | 1594 |
| Sodium.resultn | =  | Missing                    |    |                         |    | Missing     | -0.000121623 | 1595 |

|                    |    |             |                |    |             |               |         |              |              |      |
|--------------------|----|-------------|----------------|----|-------------|---------------|---------|--------------|--------------|------|
| Sodium.resultn     | <  | 136.5       |                |    | Missing     | 0.002952945   | 1595    |              |              |      |
| Sodium.resultn     | >= | 136.5       | ALB.resultn    | =  | Missing     | 4.10E-05      | 1595    |              |              |      |
| Sodium.resultn     | >= | 136.5       | ALB.resultn    | <  | 3.2         | -0.00018512   | 1595    |              |              |      |
| Sodium.resultn     | >= | 136.5       | ALB.resultn    | >= | 3.2         | ALK.times.uln | =       | Missing      | 0            | 1595 |
| Sodium.resultn     | >= | 136.5       | ALB.resultn    | >= | 3.2         | ALK.times.uln | <       | 2.85059761   | -0.000476996 | 1595 |
| Sodium.resultn     | >= | 136.5       | ALB.resultn    | >= | 3.2         | ALK.times.uln | >=      | 2.85059761   | 0.001336005  | 1595 |
| Sodium.resultn     | =  | Missing     |                |    |             | Missing       |         | -0.002417031 | 1596         |      |
| Sodium.resultn     | <  | 136.5       |                |    |             | Missing       |         | -0.000543521 | 1596         |      |
| Sodium.resultn     | >= | 136.5       | PLT.resultn    | =  | Missing     | Missing       |         | -0.002870986 | 1596         |      |
| Sodium.resultn     | >= | 136.5       | PLT.resultn    | <  | 249.5       | AST.resultn   | =       | Missing      | -0.001369507 | 1596 |
| Sodium.resultn     | >= | 136.5       | PLT.resultn    | <  | 249.5       | AST.resultn   | <       | 56           | -0.002836836 | 1596 |
| Sodium.resultn     | >= | 136.5       | PLT.resultn    | <  | 249.5       | AST.resultn   | >=      | 56           | 0            | 1596 |
| Sodium.resultn     | >= | 136.5       | PLT.resultn    | >= | 249.5       |               | Missing |              | -0.002326671 | 1596 |
| Hemoglobin.resultn | =  | Missing     | ALB.resultn    | =  | Missing     |               |         | 5.85E-05     | 1597         |      |
| Hemoglobin.resultn | =  | Missing     | ALB.resultn    | <  | 3.55        |               |         | 0.003669621  | 1597         |      |
| Hemoglobin.resultn | =  | Missing     | ALB.resultn    | >= | 3.55        |               |         | 0.000858033  | 1597         |      |
| Hemoglobin.resultn | <  | 12.35       |                |    |             |               |         | 0.000874375  | 1597         |      |
| Hemoglobin.resultn | >= | 12.35       | TBILL.resultn  | =  | Missing     |               |         | 0.000601328  | 1597         |      |
| Hemoglobin.resultn | >= | 12.35       | TBILL.resultn  | <  | 1.15        |               |         | 0.000782763  | 1597         |      |
| Hemoglobin.resultn | >= | 12.35       | TBILL.resultn  | >= | 1.15        |               |         | 0            | 1597         |      |
| age.yrs            | =  | Missing     |                |    |             | Missing       |         | -0.001191724 | 1598         |      |
| age.yrs            | <  | 67.50581793 | Sodium.resultn | =  | Missing     | Missing       |         | -0.001403412 | 1598         |      |
| age.yrs            | <  | 67.50581793 | Sodium.resultn | <  | 141.5       | TBILL.resultn | =       | Missing      | -0.001105769 | 1598 |
| age.yrs            | <  | 67.50581793 | Sodium.resultn | <  | 141.5       | TBILL.resultn | <       | 2.45         | -0.001210087 | 1598 |
| age.yrs            | <  | 67.50581793 | Sodium.resultn | <  | 141.5       | TBILL.resultn | >=      | 2.45         | 0            | 1598 |
| age.yrs            | <  | 67.50581793 | Sodium.resultn | >= | 141.5       |               | Missing |              | -0.001880515 | 1598 |
| age.yrs            | >= | 67.50581793 |                |    |             | Missing       |         | 0.002226563  | 1598         |      |
| Hemoglobin.resultn | =  | Missing     | ALB.resultn    | =  | Missing     |               |         | 7.33E-05     | 1599         |      |
| Hemoglobin.resultn | =  | Missing     | ALB.resultn    | <  | 3.95        |               |         | 0.00395071   | 1599         |      |
| Hemoglobin.resultn | =  | Missing     | ALB.resultn    | >= | 3.95        |               |         | 0.000658054  | 1599         |      |
| Hemoglobin.resultn | <  | 10.25       |                |    |             |               |         | 1.94E-05     | 1599         |      |
| Hemoglobin.resultn | >= | 10.25       | Sodium.resultn | =  | Missing     |               |         | 0            | 1599         |      |
| Hemoglobin.resultn | >= | 10.25       | Sodium.resultn | <  | 136.5       |               |         | 0.00328874   | 1599         |      |
| Hemoglobin.resultn | >= | 10.25       | Sodium.resultn | >= | 136.5       |               |         | 0.000637179  | 1599         |      |
| ALK.times.uln      | =  | Missing     | ALB.resultn    | =  | Missing     |               |         | -0.001489325 | 1600         |      |
| ALK.times.uln      | =  | Missing     | ALB.resultn    | <  | 3.75        |               |         | 0.001001888  | 1600         |      |
| ALK.times.uln      | =  | Missing     | ALB.resultn    | >= | 3.75        |               |         | -0.001163406 | 1600         |      |
| ALK.times.uln      | <  | 5.926121601 | TBILL.resultn  | =  | Missing     |               |         | -0.000829863 | 1600         |      |
| ALK.times.uln      | <  | 5.926121601 | TBILL.resultn  | <  | 2.85        |               |         | -0.000899018 | 1600         |      |
| ALK.times.uln      | <  | 5.926121601 | TBILL.resultn  | >= | 2.85        |               |         | 0            | 1600         |      |
| ALK.times.uln      | >= | 5.926121601 |                |    |             |               |         | 0.000719409  | 1600         |      |
| Sodium.resultn     | =  | Missing     |                |    |             | Missing       |         | -0.001166348 | 1601         |      |
| Sodium.resultn     | <  | 136.5       |                |    |             | Missing       |         | 0.000435096  | 1601         |      |
| Sodium.resultn     | >= | 136.5       | age.yrs        | =  | Missing     | Missing       |         | -0.000400181 | 1601         |      |
| Sodium.resultn     | >= | 136.5       | age.yrs        | <  | 68.66940452 | psc.yrs.dur   | =       | Missing      | -0.000757065 | 1601 |
| Sodium.resultn     | >= | 136.5       | age.yrs        | <  | 68.66940452 | psc.yrs.dur   | <       | 2.135523614  | -0.001181759 | 1601 |
| Sodium.resultn     | >= | 136.5       | age.yrs        | <  | 68.66940452 | psc.yrs.dur   | >=      | 2.135523614  | 0            | 1601 |
| Sodium.resultn     | >= | 136.5       | age.yrs        | >= | 68.66940452 |               | Missing |              | 0.004167931  | 1601 |
| ALK.times.uln      | =  | Missing     |                |    |             |               |         | -0.00123937  | 1602         |      |
| ALK.times.uln      | <  | 5.462893197 | TBILL.resultn  | =  | Missing     |               |         | -0.000974568 | 1602         |      |
| ALK.times.uln      | <  | 5.462893197 | TBILL.resultn  | <  | 2.45        |               |         | -0.001033993 | 1602         |      |
| ALK.times.uln      | <  | 5.462893197 | TBILL.resultn  | >= | 2.45        |               |         | 0            | 1602         |      |
| ALK.times.uln      | >= | 5.462893197 | ALK.times.uln  | =  | Missing     |               |         | 1.55E-05     | 1602         |      |
| ALK.times.uln      | >= | 5.462893197 | ALK.times.uln  | <  | 7.801810865 |               |         | 0.001040107  | 1602         |      |
| ALK.times.uln      | >= | 5.462893197 | ALK.times.uln  | >= | 7.801810865 |               |         | -0.000851411 | 1602         |      |
| PLT.resultn        | =  | Missing     |                |    |             |               |         | 0.000747222  | 1603         |      |
| PLT.resultn        | <  | 199         | Sodium.resultn | =  | Missing     |               |         | 0.002278277  | 1603         |      |
| PLT.resultn        | <  | 199         | Sodium.resultn | <  | 140.5       |               |         | 0.003556537  | 1603         |      |
| PLT.resultn        | <  | 199         | Sodium.resultn | >= | 140.5       |               |         | 0.000535195  | 1603         |      |
| PLT.resultn        | >= | 199         | ALK.times.uln  | =  | Missing     |               |         | 0            | 1603         |      |
| PLT.resultn        | >= | 199         | ALK.times.uln  | <  | 0.554228541 |               |         | 0.004284376  | 1603         |      |
| PLT.resultn        | >= | 199         | ALK.times.uln  | >= | 0.554228541 |               |         | 0.000580664  | 1603         |      |

|                |    |             |                |    |             |                |             |             |              |      |
|----------------|----|-------------|----------------|----|-------------|----------------|-------------|-------------|--------------|------|
| age.yrs        | =  | Missing     |                |    |             | Missing        | 0.000774111 | 1604        |              |      |
| age.yrs        | <  | 53.4715948  |                |    |             | Missing        | 0.000337704 | 1604        |              |      |
| age.yrs        | >= | 53.4715948  | TBILL.resultn  | =  | Missing     | Missing        | 0.00185616  | 1604        |              |      |
| age.yrs        | >= | 53.4715948  | TBILL.resultn  | <  | 1.31        | Sodium.resultn | =           | Missing     | 0            | 1604 |
| age.yrs        | >= | 53.4715948  | TBILL.resultn  | <  | 1.31        | Sodium.resultn | <           | 141.5       | 0.000787297  | 1604 |
| age.yrs        | >= | 53.4715948  | TBILL.resultn  | <  | 1.31        | Sodium.resultn | >=          | 141.5       | 0.005051465  | 1604 |
| age.yrs        | >= | 53.4715948  | TBILL.resultn  | >= | 1.31        |                | Missing     |             | 0.003765747  | 1604 |
| ALK.times.uln  | =  | Missing     | TBILL.resultn  | =  | Missing     |                |             |             | -0.000887696 | 1605 |
| ALK.times.uln  | =  | Missing     | TBILL.resultn  | <  | 0.95        |                |             |             | -0.000889658 | 1605 |
| ALK.times.uln  | =  | Missing     | TBILL.resultn  | >= | 0.95        |                |             |             | 0.000904538  | 1605 |
| ALK.times.uln  | <  | 5.446215139 | Sodium.resultn | =  | Missing     |                |             |             | 0            | 1605 |
| ALK.times.uln  | <  | 5.446215139 | Sodium.resultn | <  | 137.5       |                |             |             | 0.000736006  | 1605 |
| ALK.times.uln  | <  | 5.446215139 | Sodium.resultn | >= | 137.5       |                |             |             | -0.000913624 | 1605 |
| ALK.times.uln  | >= | 5.446215139 |                |    |             |                |             |             | 0.001139642  | 1605 |
| ALB.resultn    | =  | Missing     |                |    |             | Missing        |             |             | -0.000700008 | 1606 |
| ALB.resultn    | <  | 2.85        |                |    |             | Missing        |             |             | 0.000460285  | 1606 |
| ALB.resultn    | >= | 2.85        | ALB.resultn    | =  | Missing     |                |             |             | -0.000986266 | 1606 |
| ALB.resultn    | >= | 2.85        | ALB.resultn    | <  | 3.155       |                |             |             | -0.001188982 | 1606 |
| ALB.resultn    | >= | 2.85        | ALB.resultn    | >= | 3.155       | TBILL.resultn  | =           | Missing     | -0.000973285 | 1606 |
| ALB.resultn    | >= | 2.85        | ALB.resultn    | >= | 3.155       | TBILL.resultn  | <           | 1.25        | -0.001270326 | 1606 |
| ALB.resultn    | >= | 2.85        | ALB.resultn    | >= | 3.155       | TBILL.resultn  | >=          | 1.25        | 0            | 1606 |
| Sodium.resultn | =  | Missing     | psc.yrs.dur    | =  | Missing     |                |             |             | -0.001533419 | 1607 |
| Sodium.resultn | =  | Missing     | psc.yrs.dur    | <  | 3.208761123 |                |             |             | -0.001840103 | 1607 |
| Sodium.resultn | =  | Missing     | psc.yrs.dur    | >= | 3.208761123 |                |             |             | 0            | 1607 |
| Sodium.resultn | <  | 136.5       |                |    |             |                |             |             | 0.000122314  | 1607 |
| Sodium.resultn | >= | 136.5       | TBILL.resultn  | =  | Missing     |                |             |             | -0.001345718 | 1607 |
| Sodium.resultn | >= | 136.5       | TBILL.resultn  | <  | 3.5         |                |             |             | -0.001428562 | 1607 |
| Sodium.resultn | >= | 136.5       | TBILL.resultn  | >= | 3.5         |                |             |             | -0.000260464 | 1607 |
| ALB.resultn    | =  | Missing     |                |    |             | Missing        |             |             | -0.002228657 | 1608 |
| ALB.resultn    | <  | 2.95        |                |    |             | Missing        |             |             | 0.000102296  | 1608 |
| ALB.resultn    | >= | 2.95        | TBILL.resultn  | =  | Missing     |                |             |             | -0.001447702 | 1608 |
| ALB.resultn    | >= | 2.95        | TBILL.resultn  | <  | 1.45        | AST.resultn    | =           | Missing     | -0.001396167 | 1608 |
| ALB.resultn    | >= | 2.95        | TBILL.resultn  | <  | 1.45        | AST.resultn    | <           | 64.5        | -0.002228744 | 1608 |
| ALB.resultn    | >= | 2.95        | TBILL.resultn  | <  | 1.45        | AST.resultn    | >=          | 64.5        | 0            | 1608 |
| ALB.resultn    | >= | 2.95        | TBILL.resultn  | >= | 1.45        |                | Missing     |             | -0.001681591 | 1608 |
| Sodium.resultn | =  | Missing     | TBILL.resultn  | =  | Missing     |                |             |             | -0.001687837 | 1609 |
| Sodium.resultn | =  | Missing     | TBILL.resultn  | <  | 1.31        |                |             |             | -0.001682905 | 1609 |
| Sodium.resultn | =  | Missing     | TBILL.resultn  | >= | 1.31        |                |             |             | 0.001311684  | 1609 |
| Sodium.resultn | <  | 140.5       | ALK.times.uln  | =  | Missing     |                |             |             | 0            | 1609 |
| Sodium.resultn | <  | 140.5       | ALK.times.uln  | <  | 2.795652174 |                |             |             | -0.001683818 | 1609 |
| Sodium.resultn | <  | 140.5       | ALK.times.uln  | >= | 2.795652174 |                |             |             | 0.000599706  | 1609 |
| Sodium.resultn | >= | 140.5       |                |    |             |                |             |             | -0.00134075  | 1609 |
| ALB.resultn    | =  | Missing     |                |    |             | Missing        |             |             | -0.000540144 | 1610 |
| ALB.resultn    | <  | 3.135       |                |    |             | Missing        |             |             | 0.001544823  | 1610 |
| ALB.resultn    | >= | 3.135       | TBILL.resultn  | =  | Missing     |                |             |             | -1.74E-05    | 1610 |
| ALB.resultn    | >= | 3.135       | TBILL.resultn  | <  | 0.95        |                |             |             | -0.000360373 | 1610 |
| ALB.resultn    | >= | 3.135       | TBILL.resultn  | >= | 0.95        | PLT.resultn    | =           | Missing     | 0.000678314  | 1610 |
| ALB.resultn    | >= | 3.135       | TBILL.resultn  | >= | 0.95        | PLT.resultn    | <           | 268         | 0.001246631  | 1610 |
| ALB.resultn    | >= | 3.135       | TBILL.resultn  | >= | 0.95        | PLT.resultn    | >=          | 268         | 0            | 1610 |
| ALK.times.uln  | =  | Missing     |                |    |             | Missing        |             |             | -0.003825404 | 1611 |
| ALK.times.uln  | <  | 2.795652174 |                |    |             | Missing        |             |             | -0.003902037 | 1611 |
| ALK.times.uln  | >= | 2.795652174 | Sodium.resultn | =  | Missing     |                |             |             | -0.004437065 | 1611 |
| ALK.times.uln  | >= | 2.795652174 | Sodium.resultn | <  | 140.5       | psc.yrs.dur    | =           | Missing     | -0.00191909  | 1611 |
| ALK.times.uln  | >= | 2.795652174 | Sodium.resultn | <  | 140.5       | psc.yrs.dur    | <           | 1.180013689 | -0.003053098 | 1611 |
| ALK.times.uln  | >= | 2.795652174 | Sodium.resultn | <  | 140.5       | psc.yrs.dur    | >=          | 1.180013689 | 0            | 1611 |
| ALK.times.uln  | >= | 2.795652174 | Sodium.resultn | >= | 140.5       |                | Missing     |             | -0.003444194 | 1611 |
| AST.resultn    | =  | Missing     |                |    |             | Missing        |             |             | -0.001219088 | 1612 |
| AST.resultn    | <  | 213.5       | AST.resultn    | =  | Missing     |                |             |             | -0.001292397 | 1612 |
| AST.resultn    | <  | 213.5       | AST.resultn    | <  | 141.5       | AST.resultn    | =           | Missing     | -0.001247758 | 1612 |
| AST.resultn    | <  | 213.5       | AST.resultn    | <  | 141.5       | AST.resultn    | <           | 90          | -0.001463587 | 1612 |
| AST.resultn    | <  | 213.5       | AST.resultn    | <  | 141.5       | AST.resultn    | >=          | 90          | 0            | 1612 |
| AST.resultn    | <  | 213.5       | AST.resultn    | >= | 141.5       |                | Missing     |             | -0.001862197 | 1612 |

|                |    |             |               |    |             |                |              |             |              |      |
|----------------|----|-------------|---------------|----|-------------|----------------|--------------|-------------|--------------|------|
| AST.resultn    | >= | 213.5       |               |    | Missing     | 0.000210435    | 1612         |             |              |      |
| Sodium.resultn | =  | Missing     |               |    |             | 0.000293966    | 1613         |             |              |      |
| Sodium.resultn | <  | 137.5       | AST.resultn   | =  | Missing     | 0.002438458    | 1613         |             |              |      |
| Sodium.resultn | <  | 137.5       | AST.resultn   | <  | 67          | 0.005304334    | 1613         |             |              |      |
| Sodium.resultn | <  | 137.5       | AST.resultn   | >= | 67          | 0.000109933    | 1613         |             |              |      |
| Sodium.resultn | >= | 137.5       | PLT.resultn   | =  | Missing     | 0.000349674    | 1613         |             |              |      |
| Sodium.resultn | >= | 137.5       | PLT.resultn   | <  | 209.5       | 0.001681124    | 1613         |             |              |      |
| Sodium.resultn | >= | 137.5       | PLT.resultn   | >= | 209.5       | 0              | 1613         |             |              |      |
| ALB.resultn    | =  | Missing     |               |    | Missing     | -0.002538179   | 1614         |             |              |      |
| ALB.resultn    | <  | 2.915       |               |    | Missing     | -0.000344406   | 1614         |             |              |      |
| ALB.resultn    | >= | 2.915       | psc.yrs.dur   | =  | Missing     | -0.00190148    | 1614         |             |              |      |
| ALB.resultn    | >= | 2.915       | psc.yrs.dur   | <  | 0.472279261 | Missing        | -0.002528974 | 1614        |              |      |
| ALB.resultn    | >= | 2.915       | psc.yrs.dur   | >= | 0.472279261 | age.yrs        | =            | Missing     | -0.001262365 | 1614 |
| ALB.resultn    | >= | 2.915       | psc.yrs.dur   | >= | 0.472279261 | age.yrs        | <            | 53.56194387 | -0.001842371 | 1614 |
| ALB.resultn    | >= | 2.915       | psc.yrs.dur   | >= | 0.472279261 | age.yrs        | >=           | 53.56194387 | 0            | 1614 |
| Sodium.resultn | =  | Missing     | TBILL.resultn | =  | Missing     |                | 0            | 1615        |              |      |
| Sodium.resultn | =  | Missing     | TBILL.resultn | <  | 1.25        |                | -0.001569536 | 1615        |              |      |
| Sodium.resultn | =  | Missing     | TBILL.resultn | >= | 1.25        |                | 0.000928513  | 1615        |              |      |
| Sodium.resultn | <  | 138.5       | ALK.times.uln | =  | Missing     |                | -0.00055758  | 1615        |              |      |
| Sodium.resultn | <  | 138.5       | ALK.times.uln | <  | 2.823748484 |                | -0.000763757 | 1615        |              |      |
| Sodium.resultn | <  | 138.5       | ALK.times.uln | >= | 2.823748484 |                | 0.001245017  | 1615        |              |      |
| Sodium.resultn | >= | 138.5       |               |    |             |                | -0.001292798 | 1615        |              |      |
| age.yrs        | =  | Missing     |               |    |             | Missing        | -0.00045739  | 1616        |              |      |
| age.yrs        | <  | 53.4715948  |               |    |             | Missing        | -0.00075069  | 1616        |              |      |
| age.yrs        | >= | 53.4715948  | AST.resultn   | =  | Missing     | Missing        | 0.000284007  | 1616        |              |      |
| age.yrs        | >= | 53.4715948  | AST.resultn   | <  | 51.5        | Missing        | -0.001267507 | 1616        |              |      |
| age.yrs        | >= | 53.4715948  | AST.resultn   | >= | 51.5        | AST.resultn    | =            | Missing     | 0.001625856  | 1616 |
| age.yrs        | >= | 53.4715948  | AST.resultn   | >= | 51.5        | AST.resultn    | <            | 72          | 0.004010445  | 1616 |
| age.yrs        | >= | 53.4715948  | AST.resultn   | >= | 51.5        | AST.resultn    | >=           | 72          | 0            | 1616 |
| psc.yrs.dur    | =  | Missing     |               |    |             | Missing        | -0.001406508 | 1617        |              |      |
| psc.yrs.dur    | <  | 1.397672827 |               |    |             | Missing        | -0.001813929 | 1617        |              |      |
| psc.yrs.dur    | >= | 1.397672827 | ALK.times.uln | =  | Missing     | Missing        | -0.00093078  | 1617        |              |      |
| psc.yrs.dur    | >= | 1.397672827 | ALK.times.uln | <  | 2.822501299 | Missing        | -0.001629544 | 1617        |              |      |
| psc.yrs.dur    | >= | 1.397672827 | ALK.times.uln | >= | 2.822501299 | TBILL.resultn  | =            | Missing     | 0.001067232  | 1617 |
| psc.yrs.dur    | >= | 1.397672827 | ALK.times.uln | >= | 2.822501299 | TBILL.resultn  | <            | 1.35        | 0.002134464  | 1617 |
| psc.yrs.dur    | >= | 1.397672827 | ALK.times.uln | >= | 2.822501299 | TBILL.resultn  | >=           | 1.35        | 0            | 1617 |
| ALB.resultn    | =  | Missing     |               |    |             | Missing        | 0.000146979  | 1618        |              |      |
| ALB.resultn    | <  | 2.915       |               |    |             | Missing        | 0.002018199  | 1618        |              |      |
| ALB.resultn    | >= | 2.915       | TBILL.resultn | =  | Missing     | Missing        | 0.000410841  | 1618        |              |      |
| ALB.resultn    | >= | 2.915       | TBILL.resultn | <  | 2.65        | Sodium.resultn | =            | Missing     | 0            | 1618 |
| ALB.resultn    | >= | 2.915       | TBILL.resultn | <  | 2.65        | Sodium.resultn | <            | 137.5       | 0.001703854  | 1618 |
| ALB.resultn    | >= | 2.915       | TBILL.resultn | <  | 2.65        | Sodium.resultn | >=           | 137.5       | 0.000299464  | 1618 |
| ALB.resultn    | >= | 2.915       | TBILL.resultn | >= | 2.65        |                | Missing      |             | -9.77E-06    | 1618 |
| AST.resultn    | =  | Missing     |               |    |             | Missing        | -0.002094961 | 1619        |              |      |
| AST.resultn    | <  | 121.5       | TBILL.resultn | =  | Missing     | Missing        | -0.001067514 | 1619        |              |      |
| AST.resultn    | <  | 121.5       | TBILL.resultn | <  | 1.65        | ALB.resultn    | =            | Missing     | 0            | 1619 |
| AST.resultn    | <  | 121.5       | TBILL.resultn | <  | 1.65        | ALB.resultn    | <            | 3.25        | 0.000161507  | 1619 |
| AST.resultn    | <  | 121.5       | TBILL.resultn | <  | 1.65        | ALB.resultn    | >=           | 3.25        | -0.001379973 | 1619 |
| AST.resultn    | <  | 121.5       | TBILL.resultn | >= | 1.65        |                | Missing      |             | 7.13E-05     | 1619 |
| AST.resultn    | >= | 121.5       |               |    |             | Missing        | -0.00161988  | 1619        |              |      |
| AST.resultn    | =  | Missing     |               |    |             | Missing        | -0.001480688 | 1620        |              |      |
| AST.resultn    | <  | 43.5        |               |    |             | Missing        | -0.002219803 | 1620        |              |      |
| AST.resultn    | >= | 43.5        | AST.resultn   | =  | Missing     | Missing        | -0.000939364 | 1620        |              |      |
| AST.resultn    | >= | 43.5        | AST.resultn   | <  | 133.5       | AST.resultn    | =            | Missing     | -0.000688444 | 1620 |
| AST.resultn    | >= | 43.5        | AST.resultn   | <  | 133.5       | AST.resultn    | <            | 90          | -0.000912396 | 1620 |
| AST.resultn    | >= | 43.5        | AST.resultn   | <  | 133.5       | AST.resultn    | >=           | 90          | 0            | 1620 |
| AST.resultn    | >= | 43.5        | AST.resultn   | >= | 133.5       |                | Missing      |             | -0.001801898 | 1620 |
| ALB.resultn    | =  | Missing     |               |    |             |                | 0.000968394  | 1621        |              |      |
| ALB.resultn    | <  | 3.345       | TBILL.resultn | =  | Missing     |                | 0.001681626  | 1621        |              |      |
| ALB.resultn    | <  | 3.345       | TBILL.resultn | <  | 1.1         |                | -5.27E-05    | 1621        |              |      |
| ALB.resultn    | <  | 3.345       | TBILL.resultn | >= | 1.1         |                | 0.003589337  | 1621        |              |      |
| ALB.resultn    | >= | 3.345       | TBILL.resultn | =  | Missing     |                | 0.000773432  | 1621        |              |      |



|                |    |             |                |    |             |                    |    |              |              |      |
|----------------|----|-------------|----------------|----|-------------|--------------------|----|--------------|--------------|------|
| ALB.resultn    | >= | 3.345       | TBILL.resultn  | <  | 2.85        |                    |    | 0.000812494  | 1621         |      |
| ALB.resultn    | >= | 3.345       | TBILL.resultn  | >= | 2.85        |                    |    | 0            | 1621         |      |
| age.yrs        | =  | Missing     |                |    |             | Missing            |    | -0.002256246 | 1622         |      |
| age.yrs        | <  | 49.02395619 |                |    |             | Missing            |    | -0.002554424 | 1622         |      |
| age.yrs        | >= | 49.02395619 | AST.resultn    | =  | Missing     | Missing            |    | -0.001781596 | 1622         |      |
| age.yrs        | >= | 49.02395619 | AST.resultn    | <  | 51.5        | Missing            |    | -0.002816205 | 1622         |      |
| age.yrs        | >= | 49.02395619 | AST.resultn    | >= | 51.5        | psc.yrs.dur        | =  | Missing      | -0.000929565 | 1622 |
| age.yrs        | >= | 49.02395619 | AST.resultn    | >= | 51.5        | psc.yrs.dur        | <  | 0.476386037  | -0.002061209 | 1622 |
| age.yrs        | >= | 49.02395619 | AST.resultn    | >= | 51.5        | psc.yrs.dur        | >= | 0.476386037  | 0            | 1622 |
| AST.resultn    | =  | Missing     |                |    |             | Missing            |    | -0.002942882 | 1623         |      |
| AST.resultn    | <  | 148.5       | ALK.times.uln  | =  | Missing     | psc.yrs.dur        | =  | Missing      | -0.002143427 | 1623 |
| AST.resultn    | <  | 148.5       | ALK.times.uln  | =  | Missing     | psc.yrs.dur        | <  | 7.80971937   | -0.002939557 | 1623 |
| AST.resultn    | <  | 148.5       | ALK.times.uln  | =  | Missing     | psc.yrs.dur        | >= | 7.80971937   | 0            | 1623 |
| AST.resultn    | <  | 148.5       | ALK.times.uln  | <  | 5.462893197 |                    |    | Missing      | -0.001895163 | 1623 |
| AST.resultn    | <  | 148.5       | ALK.times.uln  | >= | 5.462893197 |                    |    | Missing      | -0.000250153 | 1623 |
| AST.resultn    | >= | 148.5       |                |    |             |                    |    | Missing      | -0.002665704 | 1623 |
| ALK.times.uln  | =  | Missing     |                |    |             |                    |    |              | -0.001134711 | 1624 |
| ALK.times.uln  | <  | 5.438574341 | TBILL.resultn  | =  | Missing     |                    |    |              | -0.00151077  | 1624 |
| ALK.times.uln  | <  | 5.438574341 | TBILL.resultn  | <  | 3.05        |                    |    |              | -0.001606389 | 1624 |
| ALK.times.uln  | <  | 5.438574341 | TBILL.resultn  | >= | 3.05        |                    |    |              | 0            | 1624 |
| ALK.times.uln  | >= | 5.438574341 | ALK.times.uln  | =  | Missing     |                    |    |              | -3.32E-05    | 1624 |
| ALK.times.uln  | >= | 5.438574341 | ALK.times.uln  | <  | 7.72173913  |                    |    |              | 0.001071894  | 1624 |
| ALK.times.uln  | >= | 5.438574341 | ALK.times.uln  | >= | 7.72173913  |                    |    |              | -0.001138315 | 1624 |
| ALB.resultn    | =  | Missing     |                |    |             |                    |    | Missing      | -0.001111064 | 1625 |
| ALB.resultn    | <  | 2.95        |                |    |             |                    |    | Missing      | 1.53E-05     | 1625 |
| ALB.resultn    | >= | 2.95        | age.yrs        | =  | Missing     |                    |    | Missing      | -0.002251448 | 1625 |
| ALB.resultn    | >= | 2.95        | age.yrs        | <  | 53.32511978 |                    |    | Missing      | -0.00247239  | 1625 |
| ALB.resultn    | >= | 2.95        | age.yrs        | >= | 53.32511978 | TBILL.resultn      | =  | Missing      | -0.001624132 | 1625 |
| ALB.resultn    | >= | 2.95        | age.yrs        | >= | 53.32511978 | TBILL.resultn      | <  | 1.15         | -0.002458145 | 1625 |
| ALB.resultn    | >= | 2.95        | age.yrs        | >= | 53.32511978 | TBILL.resultn      | >= | 1.15         | 0            | 1625 |
| AST.resultn    | =  | Missing     |                |    |             |                    |    | Missing      | 2.48E-06     | 1626 |
| AST.resultn    | <  | 221.5       | PLT.resultn    | =  | Missing     |                    |    | Missing      | -3.86E-06    | 1626 |
| AST.resultn    | <  | 221.5       | PLT.resultn    | <  | 209.5       | Hemoglobin.resultn | =  | Missing      | 0.000557086  | 1626 |
| AST.resultn    | <  | 221.5       | PLT.resultn    | <  | 209.5       | Hemoglobin.resultn | <  | 13.8         | 0.00156997   | 1626 |
| AST.resultn    | <  | 221.5       | PLT.resultn    | <  | 209.5       | Hemoglobin.resultn | >= | 13.8         | 0            | 1626 |
| AST.resultn    | <  | 221.5       | PLT.resultn    | >= | 209.5       |                    |    | Missing      | 0.000786877  | 1626 |
| AST.resultn    | >= | 221.5       |                |    |             |                    |    | Missing      | 0.004362535  | 1626 |
| Sodium.resultn | =  | Missing     |                |    |             |                    |    | Missing      | 0.000861121  | 1627 |
| Sodium.resultn | <  | 138.5       | AST.resultn    | =  | Missing     |                    |    | Missing      | 0.002056509  | 1627 |
| Sodium.resultn | <  | 138.5       | AST.resultn    | <  | 65.5        |                    |    | Missing      | 0.003772389  | 1627 |
| Sodium.resultn | <  | 138.5       | AST.resultn    | >= | 65.5        | ALB.resultn        | =  | Missing      | 0.000886592  | 1627 |
| Sodium.resultn | <  | 138.5       | AST.resultn    | >= | 65.5        | ALB.resultn        | <  | 3.815        | 0.001861843  | 1627 |
| Sodium.resultn | <  | 138.5       | AST.resultn    | >= | 65.5        | ALB.resultn        | >= | 3.815        | 0            | 1627 |
| Sodium.resultn | >= | 138.5       |                |    |             |                    |    | Missing      | 0.000716192  | 1627 |
| psc.yrs.dur    | =  | Missing     |                |    |             |                    |    | Missing      | 0.000148068  | 1628 |
| psc.yrs.dur    | <  | 2.05065024  |                |    |             |                    |    | Missing      | -8.33E-05    | 1628 |
| psc.yrs.dur    | >= | 2.05065024  | TBILL.resultn  | =  | Missing     |                    |    | Missing      | 0.000670069  | 1628 |
| psc.yrs.dur    | >= | 2.05065024  | TBILL.resultn  | <  | 2.4         | ALK.times.uln      | =  | Missing      | 0            | 1628 |
| psc.yrs.dur    | >= | 2.05065024  | TBILL.resultn  | <  | 2.4         | ALK.times.uln      | <  | 2.822501299  | -0.000111529 | 1628 |
| psc.yrs.dur    | >= | 2.05065024  | TBILL.resultn  | <  | 2.4         | ALK.times.uln      | >= | 2.822501299  | 0.002227309  | 1628 |
| psc.yrs.dur    | >= | 2.05065024  | TBILL.resultn  | >= | 2.4         |                    |    | Missing      | 0.001598895  | 1628 |
| psc.yrs.dur    | =  | Missing     |                |    |             |                    |    | Missing      | 0.000732728  | 1629 |
| psc.yrs.dur    | <  | 1.397672827 |                |    |             |                    |    | Missing      | 0.000401475  | 1629 |
| psc.yrs.dur    | >= | 1.397672827 | Sodium.resultn | =  | Missing     | PLT.resultn        | =  | Missing      | 0.000639809  | 1629 |
| psc.yrs.dur    | >= | 1.397672827 | Sodium.resultn | =  | Missing     | PLT.resultn        | <  | 222.5        | 0.001535541  | 1629 |
| psc.yrs.dur    | >= | 1.397672827 | Sodium.resultn | =  | Missing     | PLT.resultn        | >= | 222.5        | 0            | 1629 |
| psc.yrs.dur    | >= | 1.397672827 | Sodium.resultn | <  | 138.5       |                    |    | Missing      | 0.003246153  | 1629 |
| psc.yrs.dur    | >= | 1.397672827 | Sodium.resultn | >= | 138.5       |                    |    | Missing      | 0.001138955  | 1629 |
| ALB.resultn    | =  | Missing     |                |    |             |                    |    |              | -0.00042668  | 1630 |
| ALB.resultn    | <  | 3.31        | TBILL.resultn  | =  | Missing     |                    |    |              | 0.000374207  | 1630 |
| ALB.resultn    | <  | 3.31        | TBILL.resultn  | <  | 1.5         |                    |    |              | -0.000372427 | 1630 |
| ALB.resultn    | <  | 3.31        | TBILL.resultn  | >= | 1.5         |                    |    |              | 0.001256593  | 1630 |

|                    |    |             |               |    |             |                         |              |      |
|--------------------|----|-------------|---------------|----|-------------|-------------------------|--------------|------|
| ALB.resultn        | >= | 3.31        | ALK.times.uln | =  | Missing     |                         | 0            | 1630 |
| ALB.resultn        | >= | 3.31        | ALK.times.uln | <  | 5.438574341 |                         | -0.000698594 | 1630 |
| ALB.resultn        | >= | 3.31        | ALK.times.uln | >= | 5.438574341 |                         | 0.000501495  | 1630 |
| Hemoglobin.resultn | =  | Missing     | TBILL.resultn | =  | Missing     | Missing                 | -0.001296136 | 1631 |
| Hemoglobin.resultn | =  | Missing     | TBILL.resultn | <  | 0.95        | Missing                 | -0.002501398 | 1631 |
| Hemoglobin.resultn | =  | Missing     | TBILL.resultn | >= | 0.95        | ALB.resultn = Missing   | 0.000160222  | 1631 |
| Hemoglobin.resultn | =  | Missing     | TBILL.resultn | >= | 0.95        | ALB.resultn < 3.95      | 0.000293741  | 1631 |
| Hemoglobin.resultn | =  | Missing     | TBILL.resultn | >= | 0.95        | ALB.resultn >= 3.95     | 0            | 1631 |
| Hemoglobin.resultn | <  | 12.25       |               |    |             | Missing                 | -0.001971426 | 1631 |
| Hemoglobin.resultn | >= | 12.25       |               |    |             | Missing                 | -0.001574953 | 1631 |
| psc.yrs.dur        | =  | Missing     |               |    |             |                         | 0.000483096  | 1632 |
| psc.yrs.dur        | <  | 7.330595483 | AST.resultn   | =  | Missing     |                         | 0.000375654  | 1632 |
| psc.yrs.dur        | <  | 7.330595483 | AST.resultn   | <  | 73          |                         | 0.000602729  | 1632 |
| psc.yrs.dur        | <  | 7.330595483 | AST.resultn   | >= | 73          |                         | 0            | 1632 |
| psc.yrs.dur        | >= | 7.330595483 | AST.resultn   | =  | Missing     |                         | 0.001255987  | 1632 |
| psc.yrs.dur        | >= | 7.330595483 | AST.resultn   | <  | 40          |                         | -0.000447703 | 1632 |
| psc.yrs.dur        | >= | 7.330595483 | AST.resultn   | >= | 40          |                         | 0.002486431  | 1632 |
| Sodium.resultn     | =  | Missing     |               |    |             |                         | 0.000353956  | 1633 |
| Sodium.resultn     | <  | 137.5       | AST.resultn   | =  | Missing     |                         | 0.001939524  | 1633 |
| Sodium.resultn     | <  | 137.5       | AST.resultn   | <  | 67          |                         | 0.003684967  | 1633 |
| Sodium.resultn     | <  | 137.5       | AST.resultn   | >= | 67          |                         | 0.000469677  | 1633 |
| Sodium.resultn     | >= | 137.5       | TBILL.resultn | =  | Missing     |                         | 0.000458663  | 1633 |
| Sodium.resultn     | >= | 137.5       | TBILL.resultn | <  | 2.15        |                         | 0.000501933  | 1633 |
| Sodium.resultn     | >= | 137.5       | TBILL.resultn | >= | 2.15        |                         | 0            | 1633 |
| age.yrs            | =  | Missing     |               |    |             | Missing                 | -0.001492385 | 1634 |
| age.yrs            | <  | 69.51266256 | ALK.times.uln | =  | Missing     | Missing                 | -0.00155379  | 1634 |
| age.yrs            | <  | 69.51266256 | ALK.times.uln | <  | 4.964143426 | Missing                 | -0.001923651 | 1634 |
| age.yrs            | <  | 69.51266256 | ALK.times.uln | >= | 4.964143426 | TBILL.resultn = Missing | -0.000954372 | 1634 |
| age.yrs            | <  | 69.51266256 | ALK.times.uln | >= | 4.964143426 | TBILL.resultn < 2.05    | -0.001456672 | 1634 |
| age.yrs            | <  | 69.51266256 | ALK.times.uln | >= | 4.964143426 | TBILL.resultn >= 2.05   | 0            | 1634 |
| age.yrs            | >= | 69.51266256 |               |    |             | Missing                 | 0.003681581  | 1634 |
| ALK.times.uln      | =  | Missing     | psc.yrs.dur   | =  | Missing     | Missing                 | 0.00040829   | 1635 |
| ALK.times.uln      | =  | Missing     | psc.yrs.dur   | <  | 0.125941136 | Missing                 | -0.000260915 | 1635 |
| ALK.times.uln      | =  | Missing     | psc.yrs.dur   | >= | 0.125941136 | ALB.resultn = Missing   | 0.000582284  | 1635 |
| ALK.times.uln      | =  | Missing     | psc.yrs.dur   | >= | 0.125941136 | ALB.resultn < 3.95      | 0.002387363  | 1635 |
| ALK.times.uln      | =  | Missing     | psc.yrs.dur   | >= | 0.125941136 | ALB.resultn >= 3.95     | 0            | 1635 |
| ALK.times.uln      | <  | 5.462893197 |               |    |             | Missing                 | 0.000202882  | 1635 |
| ALK.times.uln      | >= | 5.462893197 |               |    |             | Missing                 | 0.001460912  | 1635 |
| psc.yrs.dur        | =  | Missing     |               |    |             | Missing                 | 0.000130808  | 1636 |
| psc.yrs.dur        | <  | 1.397672827 |               |    |             | Missing                 | -0.000295005 | 1636 |
| psc.yrs.dur        | >= | 1.397672827 | ALK.times.uln | =  | Missing     | Missing                 | 0.002343617  | 1636 |
| psc.yrs.dur        | >= | 1.397672827 | ALK.times.uln | <  | 2.773309179 | Missing                 | -0.000799181 | 1636 |
| psc.yrs.dur        | >= | 1.397672827 | ALK.times.uln | >= | 2.773309179 | TBILL.resultn = Missing | 0.002567718  | 1636 |
| psc.yrs.dur        | >= | 1.397672827 | ALK.times.uln | >= | 2.773309179 | TBILL.resultn < 1.35    | 0.004902006  | 1636 |
| psc.yrs.dur        | >= | 1.397672827 | ALK.times.uln | >= | 2.773309179 | TBILL.resultn >= 1.35   | 0            | 1636 |
| ALB.resultn        | =  | Missing     |               |    |             | Missing                 | -0.000765936 | 1637 |
| ALB.resultn        | <  | 3.13        |               |    |             | Missing                 | 0.000537451  | 1637 |
| ALB.resultn        | >= | 3.13        | TBILL.resultn | =  | Missing     | Missing                 | -0.001029779 | 1637 |
| ALB.resultn        | >= | 3.13        | TBILL.resultn | <  | 2.75        | age.yrs = Missing       | -0.000995849 | 1637 |
| ALB.resultn        | >= | 3.13        | TBILL.resultn | <  | 2.75        | age.yrs < 49.41957563   | -0.001490029 | 1637 |
| ALB.resultn        | >= | 3.13        | TBILL.resultn | <  | 2.75        | age.yrs >= 49.41957563  | 0            | 1637 |
| ALB.resultn        | >= | 3.13        | TBILL.resultn | >= | 2.75        | Missing                 | -0.001643604 | 1637 |
| Hemoglobin.resultn | =  | Missing     | ALB.resultn   | =  | Missing     |                         | -0.002244768 | 1638 |
| Hemoglobin.resultn | =  | Missing     | ALB.resultn   | <  | 3.95        |                         | -0.000252315 | 1638 |
| Hemoglobin.resultn | =  | Missing     | ALB.resultn   | >= | 3.95        |                         | -0.00225712  | 1638 |
| Hemoglobin.resultn | <  | 13.75       | ALK.times.uln | =  | Missing     |                         | -0.000981043 | 1638 |
| Hemoglobin.resultn | <  | 13.75       | ALK.times.uln | <  | 2.823748484 |                         | -0.001635071 | 1638 |
| Hemoglobin.resultn | <  | 13.75       | ALK.times.uln | >= | 2.823748484 |                         | 0            | 1638 |
| Hemoglobin.resultn | >= | 13.75       |               |    |             |                         | -0.002256868 | 1638 |
| psc.yrs.dur        | =  | Missing     |               |    |             |                         | 0.000201255  | 1639 |
| psc.yrs.dur        | <  | 6.410677618 | ALK.times.uln | =  | Missing     |                         | 0            | 1639 |
| psc.yrs.dur        | <  | 6.410677618 | ALK.times.uln | <  | 7.405360736 |                         | 0.00013374   | 1639 |

|               |    |                           |             |                         |               |             |              |              |      |
|---------------|----|---------------------------|-------------|-------------------------|---------------|-------------|--------------|--------------|------|
| psc.yrs.dur   | <  | 6.410677618 ALK.times.uln | >=          | 7.405360736             |               |             | -0.000401967 | 1639         |      |
| psc.yrs.dur   | >= | 6.410677618 AST.resultn   | =           | Missing                 |               |             | 0.000992352  | 1639         |      |
| psc.yrs.dur   | >= | 6.410677618 AST.resultn   | <           | 43                      |               |             | -0.000736198 | 1639         |      |
| psc.yrs.dur   | >= | 6.410677618 AST.resultn   | >=          | 43                      |               |             | 0.002828938  | 1639         |      |
| psc.yrs.dur   | =  | Missing                   |             |                         |               | Missing     | 0.000228566  | 1640         |      |
| psc.yrs.dur   | <  | 1.961670089               |             |                         |               | Missing     | -8.15E-05    | 1640         |      |
| psc.yrs.dur   | >= | 1.961670089 ALB.resultn   | =           | Missing                 |               | Missing     | 0.000813485  | 1640         |      |
| psc.yrs.dur   | >= | 1.961670089 ALB.resultn   | <           | 3.35                    |               | Missing     | 0.001961123  | 1640         |      |
| psc.yrs.dur   | >= | 1.961670089 ALB.resultn   | >=          | 3.35 psc.yrs.dur        | =             | Missing     | 0.000613896  | 1640         |      |
| psc.yrs.dur   | >= | 1.961670089 ALB.resultn   | >=          | 3.35 psc.yrs.dur        | <             | 2.933607118 | 0.003850803  | 1640         |      |
| psc.yrs.dur   | >= | 1.961670089 ALB.resultn   | >=          | 3.35 psc.yrs.dur        | >=            | 2.933607118 | 0            | 1640         |      |
| ALB.resultn   | =  | Missing                   |             |                         |               | Missing     | -0.001619582 | 1641         |      |
| ALB.resultn   | <  | 3.03                      |             |                         |               | Missing     | 0.000515329  | 1641         |      |
| ALB.resultn   | >= | 3.03 TBILL.resultn        | =           | Missing                 |               | Missing     | -0.000774668 | 1641         |      |
| ALB.resultn   | >= | 3.03 TBILL.resultn        | <           | 3.35 TBILL.resultn      | =             | Missing     | -0.000762105 | 1641         |      |
| ALB.resultn   | >= | 3.03 TBILL.resultn        | <           | 3.35 TBILL.resultn      | <             | 0.75        | -0.001629608 | 1641         |      |
| ALB.resultn   | >= | 3.03 TBILL.resultn        | <           | 3.35 TBILL.resultn      | >=            | 0.75        | 0            | 1641         |      |
| ALB.resultn   | >= | 3.03 TBILL.resultn        | >=          | 3.35                    |               | Missing     | -0.00100422  | 1641         |      |
| age.yrs       | =  | Missing                   |             |                         |               | Missing     | -0.000413527 | 1642         |      |
| age.yrs       | <  | 69.84257358 ALK.times.uln | =           | Missing                 |               | Missing     | -0.000407502 | 1642         |      |
| age.yrs       | <  | 69.84257358 ALK.times.uln | <           | 5.462893197             |               | Missing     | -0.000805021 | 1642         |      |
| age.yrs       | <  | 69.84257358 ALK.times.uln | >=          | 5.462893197 AST.resultn | =             | Missing     | 0.000678523  | 1642         |      |
| age.yrs       | <  | 69.84257358 ALK.times.uln | >=          | 5.462893197 AST.resultn | <             | 121         | 0.001492751  | 1642         |      |
| age.yrs       | <  | 69.84257358 ALK.times.uln | >=          | 5.462893197 AST.resultn | >=            | 121         | 0            | 1642         |      |
| age.yrs       | >= | 69.84257358               |             |                         |               | Missing     | 0.003244105  | 1642         |      |
| AST.resultn   | =  | Missing                   |             |                         |               | Missing     | -0.002294742 | 1643         |      |
| AST.resultn   | <  | 141.5 Sodium.resultn      | =           | Missing                 | TBILL.resultn | =           | Missing      | -0.001807647 | 1643 |
| AST.resultn   | <  | 141.5 Sodium.resultn      | =           | Missing                 | TBILL.resultn | <           | 1.25         | -0.002300641 | 1643 |
| AST.resultn   | <  | 141.5 Sodium.resultn      | =           | Missing                 | TBILL.resultn | >=          | 1.25         | 0            | 1643 |
| AST.resultn   | <  | 141.5 Sodium.resultn      | <           | 136.5                   |               | Missing     | 0.000907827  | 1643         |      |
| AST.resultn   | <  | 141.5 Sodium.resultn      | >=          | 136.5                   |               | Missing     | -0.001327966 | 1643         |      |
| AST.resultn   | >= | 141.5                     |             |                         |               | Missing     | -0.00204465  | 1643         |      |
| ALK.times.uln | =  | Missing                   | AST.resultn | =                       | Missing       |             | -0.001065951 | 1644         |      |
| ALK.times.uln | =  | Missing                   | AST.resultn | <                       | 110           |             | -0.001525625 | 1644         |      |
| ALK.times.uln | =  | Missing                   | AST.resultn | >=                      | 110           |             | 0.000864681  | 1644         |      |
| ALK.times.uln | <  | 6.02 ALB.resultn          | =           | Missing                 |               |             | 0            | 1644         |      |
| ALK.times.uln | <  | 6.02 ALB.resultn          | <           | 4.25                    |               |             | -0.001549048 | 1644         |      |
| ALK.times.uln | <  | 6.02 ALB.resultn          | >=          | 4.25                    |               |             | -0.000585349 | 1644         |      |
| ALK.times.uln | >= | 6.02                      |             |                         |               |             | -1.04E-05    | 1644         |      |
| ALB.resultn   | =  | Missing                   |             |                         |               | Missing     | -0.002259896 | 1645         |      |
| ALB.resultn   | <  | 2.95                      |             |                         |               | Missing     | -0.000670427 | 1645         |      |
| ALB.resultn   | >= | 2.95 psc.yrs.dur          | =           | Missing                 |               | Missing     | -0.002165669 | 1645         |      |
| ALB.resultn   | >= | 2.95 psc.yrs.dur          | <           | 6.324435318             |               | Missing     | -0.002302038 | 1645         |      |
| ALB.resultn   | >= | 2.95 psc.yrs.dur          | >=          | 6.324435318 AST.resultn | =             | Missing     | -0.001468237 | 1645         |      |
| ALB.resultn   | >= | 2.95 psc.yrs.dur          | >=          | 6.324435318 AST.resultn | <             | 47          | -0.002854905 | 1645         |      |
| ALB.resultn   | >= | 2.95 psc.yrs.dur          | >=          | 6.324435318 AST.resultn | >=            | 47          | 0            | 1645         |      |
| TBILL.resultn | =  | Missing                   |             |                         |               |             | -4.13E-05    | 1646         |      |
| TBILL.resultn | <  | 1.95 PLT.resultn          | =           | Missing                 |               |             | 0            | 1646         |      |
| TBILL.resultn | <  | 1.95 PLT.resultn          | <           | 185.5                   |               |             | 0.000502217  | 1646         |      |
| TBILL.resultn | <  | 1.95 PLT.resultn          | >=          | 185.5                   |               |             | -0.00128623  | 1646         |      |
| TBILL.resultn | >= | 1.95 ALB.resultn          | =           | Missing                 |               |             | 0.000148314  | 1646         |      |
| TBILL.resultn | >= | 1.95 ALB.resultn          | <           | 3.75                    |               |             | 0.001059219  | 1646         |      |
| TBILL.resultn | >= | 1.95 ALB.resultn          | >=          | 3.75                    |               |             | -0.000762592 | 1646         |      |
| ALB.resultn   | =  | Missing                   |             |                         |               | Missing     | -0.002011876 | 1647         |      |
| ALB.resultn   | <  | 2.825                     |             |                         |               | Missing     | 0.000174418  | 1647         |      |
| ALB.resultn   | >= | 2.825 TBILL.resultn       | =           | Missing                 |               | Missing     | -0.001262736 | 1647         |      |
| ALB.resultn   | >= | 2.825 TBILL.resultn       | <           | 0.95                    |               | Missing     | -0.001716931 | 1647         |      |
| ALB.resultn   | >= | 2.825 TBILL.resultn       | >=          | 0.95 Sodium.resultn     | =             | Missing     | 0            | 1647         |      |
| ALB.resultn   | >= | 2.825 TBILL.resultn       | >=          | 0.95 Sodium.resultn     | <             | 141.5       | -0.000431108 | 1647         |      |
| ALB.resultn   | >= | 2.825 TBILL.resultn       | >=          | 0.95 Sodium.resultn     | >=            | 141.5       | -0.001657883 | 1647         |      |
| PLT.resultn   | =  | Missing                   |             |                         |               |             | -0.000532367 | 1648         |      |
| PLT.resultn   | <  | 209.5 TBILL.resultn       | =           | Missing                 |               |             | 0.000270938  | 1648         |      |

|                    |    |             |                    |    |             |                    |         |              |              |      |
|--------------------|----|-------------|--------------------|----|-------------|--------------------|---------|--------------|--------------|------|
| PLT.resultn        | <  | 209.5       | TBILI.resultn      | <  | 1.6         |                    |         | -0.000235873 | 1648         |      |
| PLT.resultn        | <  | 209.5       | TBILI.resultn      | >= | 1.6         |                    |         | 0.002044777  | 1648         |      |
| PLT.resultn        | >= | 209.5       | ALK.times.uln      | =  | Missing     |                    |         | 0            | 1648         |      |
| PLT.resultn        | >= | 209.5       | ALK.times.uln      | <  | 5.689103147 |                    |         | -0.001175945 | 1648         |      |
| PLT.resultn        | >= | 209.5       | ALK.times.uln      | >= | 5.689103147 |                    |         | 0.000435735  | 1648         |      |
| ALB.resultn        | =  | Missing     |                    |    |             | Missing            |         | 0.000140665  | 1649         |      |
| ALB.resultn        | <  | 2.915       |                    |    |             | Missing            |         | 0.00139657   | 1649         |      |
| ALB.resultn        | >= | 2.915       | TBILI.resultn      | =  | Missing     | Missing            |         | 0.000248151  | 1649         |      |
| ALB.resultn        | >= | 2.915       | TBILI.resultn      | <  | 2.65        | Sodium.resultn     | =       | Missing      | 0            | 1649 |
| ALB.resultn        | >= | 2.915       | TBILI.resultn      | <  | 2.65        | Sodium.resultn     | <       | 136.5        | 0.002121665  | 1649 |
| ALB.resultn        | >= | 2.915       | TBILI.resultn      | <  | 2.65        | Sodium.resultn     | >=      | 136.5        | 0.000278247  | 1649 |
| ALB.resultn        | >= | 2.915       | TBILI.resultn      | >= | 2.65        |                    | Missing | -4.44E-06    | 1649         |      |
| psc.yrs.dur        | =  | Missing     |                    |    |             |                    |         | 0.000855731  | 1650         |      |
| psc.yrs.dur        | <  | 8.020533881 | TBILI.resultn      | =  | Missing     |                    |         | 0            | 1650         |      |
| psc.yrs.dur        | <  | 8.020533881 | TBILI.resultn      | <  | 2.65        |                    |         | 0.000848029  | 1650         |      |
| psc.yrs.dur        | <  | 8.020533881 | TBILI.resultn      | >= | 2.65        |                    |         | 0.000434699  | 1650         |      |
| psc.yrs.dur        | >= | 8.020533881 | ALB.resultn        | =  | Missing     |                    |         | 0.001534582  | 1650         |      |
| psc.yrs.dur        | >= | 8.020533881 | ALB.resultn        | <  | 3.515       |                    |         | 0.003880917  | 1650         |      |
| psc.yrs.dur        | >= | 8.020533881 | ALB.resultn        | >= | 3.515       |                    |         | -2.96E-05    | 1650         |      |
| TBILI.resultn      | =  | Missing     |                    |    |             | Missing            |         | -0.000258466 | 1651         |      |
| TBILI.resultn      | <  | 1.55        |                    |    |             | Missing            |         | -0.001144842 | 1651         |      |
| TBILI.resultn      | >= | 1.55        | age.yrs            | =  | Missing     | Missing            |         | -8.42E-05    | 1651         |      |
| TBILI.resultn      | >= | 1.55        | age.yrs            | <  | 50.63244353 | AST.resultn        | =       | Missing      | -0.000812324 | 1651 |
| TBILI.resultn      | >= | 1.55        | age.yrs            | <  | 50.63244353 | AST.resultn        | <       | 122          | -0.001624648 | 1651 |
| TBILI.resultn      | >= | 1.55        | age.yrs            | <  | 50.63244353 | AST.resultn        | >=      | 122          | 0            | 1651 |
| TBILI.resultn      | >= | 1.55        | age.yrs            | >= | 50.63244353 |                    | Missing | 0.001736225  | 1651         |      |
| TBILI.resultn      | =  | Missing     |                    |    |             | Missing            |         | 0.001808394  | 1652         |      |
| TBILI.resultn      | <  | 0.65        |                    |    |             | Missing            |         | -0.000570326 | 1652         |      |
| TBILI.resultn      | >= | 0.65        | Hemoglobin.resultn | =  | Missing     | Missing            |         | 0.001460252  | 1652         |      |
| TBILI.resultn      | >= | 0.65        | Hemoglobin.resultn | <  | 13.85       | PLT.resultn        | =       | Missing      | 0.001124879  | 1652 |
| TBILI.resultn      | >= | 0.65        | Hemoglobin.resultn | <  | 13.85       | PLT.resultn        | <       | 249.5        | 0.002999677  | 1652 |
| TBILI.resultn      | >= | 0.65        | Hemoglobin.resultn | <  | 13.85       | PLT.resultn        | >=      | 249.5        | 0            | 1652 |
| TBILI.resultn      | >= | 0.65        | Hemoglobin.resultn | >= | 13.85       |                    | Missing | -0.000349603 | 1652         |      |
| ALB.resultn        | =  | Missing     |                    |    |             | Missing            |         | -0.000608113 | 1653         |      |
| ALB.resultn        | <  | 2.915       |                    |    |             | Missing            |         | 0.000417809  | 1653         |      |
| ALB.resultn        | >= | 2.915       | TBILI.resultn      | =  | Missing     | Missing            |         | -0.000770559 | 1653         |      |
| ALB.resultn        | >= | 2.915       | TBILI.resultn      | <  | 0.75        | Missing            |         | -0.001502373 | 1653         |      |
| ALB.resultn        | >= | 2.915       | TBILI.resultn      | >= | 0.75        | Hemoglobin.resultn | =       | Missing      | 0            | 1653 |
| ALB.resultn        | >= | 2.915       | TBILI.resultn      | >= | 0.75        | Hemoglobin.resultn | <       | 11.85        | -0.001157469 | 1653 |
| ALB.resultn        | >= | 2.915       | TBILI.resultn      | >= | 0.75        | Hemoglobin.resultn | >=      | 11.85        | -1.43E-05    | 1653 |
| TBILI.resultn      | =  | Missing     |                    |    |             |                    |         | -0.00344747  | 1654         |      |
| TBILI.resultn      | <  | 1.65        | age.yrs            | =  | Missing     |                    |         | -0.002794042 | 1654         |      |
| TBILI.resultn      | <  | 1.65        | age.yrs            | <  | 69.76043806 |                    |         | -0.002983222 | 1654         |      |
| TBILI.resultn      | <  | 1.65        | age.yrs            | >= | 69.76043806 |                    |         | 0            | 1654         |      |
| TBILI.resultn      | >= | 1.65        | PLT.resultn        | =  | Missing     |                    |         | -0.002053987 | 1654         |      |
| TBILI.resultn      | >= | 1.65        | PLT.resultn        | <  | 217         |                    |         | -0.000816741 | 1654         |      |
| TBILI.resultn      | >= | 1.65        | PLT.resultn        | >= | 217         |                    |         | -0.00259192  | 1654         |      |
| Sodium.resultn     | =  | Missing     | TBILI.resultn      | =  | Missing     |                    |         | 0            | 1655         |      |
| Sodium.resultn     | =  | Missing     | TBILI.resultn      | <  | 1.25        |                    |         | -0.001309446 | 1655         |      |
| Sodium.resultn     | =  | Missing     | TBILI.resultn      | >= | 1.25        |                    |         | 0.0009843    | 1655         |      |
| Sodium.resultn     | <  | 136.5       |                    |    |             |                    |         | 0.000760888  | 1655         |      |
| Sodium.resultn     | >= | 136.5       | age.yrs            | =  | Missing     |                    |         | -0.000584245 | 1655         |      |
| Sodium.resultn     | >= | 136.5       | age.yrs            | <  | 64.89253936 |                    |         | -0.00083043  | 1655         |      |
| Sodium.resultn     | >= | 136.5       | age.yrs            | >= | 64.89253936 |                    |         | 0.001789676  | 1655         |      |
| ALB.resultn        | =  | Missing     |                    |    |             | Missing            |         | -0.001625483 | 1656         |      |
| ALB.resultn        | <  | 2.965       |                    |    |             | Missing            |         | -0.000588341 | 1656         |      |
| ALB.resultn        | >= | 2.965       | TBILI.resultn      | =  | Missing     | Missing            |         | -0.002301254 | 1656         |      |
| ALB.resultn        | >= | 2.965       | TBILI.resultn      | <  | 0.95        | Missing            |         | -0.002796027 | 1656         |      |
| ALB.resultn        | >= | 2.965       | TBILI.resultn      | >= | 0.95        | psc.yrs.dur        | =       | Missing      | -0.00147663  | 1656 |
| ALB.resultn        | >= | 2.965       | TBILI.resultn      | >= | 0.95        | psc.yrs.dur        | <       | 6.783025325  | -0.001857696 | 1656 |
| ALB.resultn        | >= | 2.965       | TBILI.resultn      | >= | 0.95        | psc.yrs.dur        | >=      | 6.783025325  | 0            | 1656 |
| Hemoglobin.resultn | =  | Missing     | TBILI.resultn      | =  | Missing     |                    |         | -0.001557584 | 1657         |      |

|                    |    |             |                    |    |             |                    |         |              |              |      |
|--------------------|----|-------------|--------------------|----|-------------|--------------------|---------|--------------|--------------|------|
| Hemoglobin.resultn | =  | Missing     | TBILI.resultn      | <  | 1.15        |                    |         | -0.002133213 | 1657         |      |
| Hemoglobin.resultn | =  | Missing     | TBILI.resultn      | >= | 1.15        |                    |         | 0            | 1657         |      |
| Hemoglobin.resultn | <  | 11.85       | psc.yrs.dur        | =  | Missing     |                    |         | -0.001716097 | 1657         |      |
| Hemoglobin.resultn | <  | 11.85       | psc.yrs.dur        | <  | 2.20807666  |                    |         | -0.002743927 | 1657         |      |
| Hemoglobin.resultn | <  | 11.85       | psc.yrs.dur        | >= | 2.20807666  |                    |         | -0.000277134 | 1657         |      |
| Hemoglobin.resultn | >= | 11.85       |                    |    |             |                    |         | -0.002168183 | 1657         |      |
| AST.resultn        | =  | Missing     |                    |    |             | Missing            |         | -0.003321475 | 1658         |      |
| AST.resultn        | <  | 151.5       | TBILI.resultn      | =  | Missing     | Missing            |         | -0.002263221 | 1658         |      |
| AST.resultn        | <  | 151.5       | TBILI.resultn      | <  | 1.65        | Missing            |         | -0.002375969 | 1658         |      |
| AST.resultn        | <  | 151.5       | TBILI.resultn      | >= | 1.65        | age.yrs            | =       | Missing      | -0.00156794  | 1658 |
| AST.resultn        | <  | 151.5       | TBILI.resultn      | >= | 1.65        | age.yrs            | <       | 51.10746064  | -0.00235191  | 1658 |
| AST.resultn        | <  | 151.5       | TBILI.resultn      | >= | 1.65        | age.yrs            | >=      | 51.10746064  | 0            | 1658 |
| AST.resultn        | >= | 151.5       |                    |    |             | Missing            |         | -0.003072789 | 1658         |      |
| age.yrs            | =  | Missing     |                    |    |             | Missing            |         | -0.001023744 | 1659         |      |
| age.yrs            | <  | 69.22108145 | ALK.times.uln      | =  | Missing     | Missing            |         | -0.000981403 | 1659         |      |
| age.yrs            | <  | 69.22108145 | ALK.times.uln      | <  | 5.963877551 | psc.yrs.dur        | =       | Missing      | -0.001281634 | 1659 |
| age.yrs            | <  | 69.22108145 | ALK.times.uln      | <  | 5.963877551 | psc.yrs.dur        | <       | 2            | -0.001701842 | 1659 |
| age.yrs            | <  | 69.22108145 | ALK.times.uln      | <  | 5.963877551 | psc.yrs.dur        | >=      | 2            | 0            | 1659 |
| age.yrs            | <  | 69.22108145 | ALK.times.uln      | >= | 5.963877551 |                    | Missing | -0.000132229 | 1659         |      |
| age.yrs            | >= | 69.22108145 |                    |    |             | Missing            |         | 0.001533125  | 1659         |      |
| Sodium.resultn     | =  | Missing     | TBILI.resultn      | =  | Missing     |                    |         | -0.00154062  | 1660         |      |
| Sodium.resultn     | =  | Missing     | TBILI.resultn      | <  | 1.25        |                    |         | -0.001518921 | 1660         |      |
| Sodium.resultn     | =  | Missing     | TBILI.resultn      | >= | 1.25        |                    |         | 0.000334142  | 1660         |      |
| Sodium.resultn     | <  | 136.5       |                    |    |             |                    |         | 0.000407937  | 1660         |      |
| Sodium.resultn     | >= | 136.5       | Hemoglobin.resultn | =  | Missing     |                    |         | 0            | 1660         |      |
| Sodium.resultn     | >= | 136.5       | Hemoglobin.resultn | <  | 13.95       |                    |         | -0.000486203 | 1660         |      |
| Sodium.resultn     | >= | 136.5       | Hemoglobin.resultn | >= | 13.95       |                    |         | -0.001539815 | 1660         |      |
| ALK.times.uln      | =  | Missing     | age.yrs            | =  | Missing     | Missing            |         | -0.002686395 | 1661         |      |
| ALK.times.uln      | =  | Missing     | age.yrs            | <  | 53.46475017 |                    | Missing | -0.003136513 | 1661         |      |
| ALK.times.uln      | =  | Missing     | age.yrs            | >= | 53.46475017 | AST.resultn        | =       | Missing      | -0.001704319 | 1661 |
| ALK.times.uln      | =  | Missing     | age.yrs            | >= | 53.46475017 | AST.resultn        | <       | 42           | -0.003124585 | 1661 |
| ALK.times.uln      | =  | Missing     | age.yrs            | >= | 53.46475017 | AST.resultn        | >=      | 42           | 0            | 1661 |
| ALK.times.uln      | <  | 5.446215139 |                    |    |             | Missing            |         | -0.00239986  | 1661         |      |
| ALK.times.uln      | >= | 5.446215139 |                    |    |             | Missing            |         | -0.001403572 | 1661         |      |
| age.yrs            | =  | Missing     |                    |    |             | Missing            |         | -0.002363589 | 1662         |      |
| age.yrs            | <  | 51.53319644 |                    |    |             | Missing            |         | -0.002506937 | 1662         |      |
| age.yrs            | >= | 51.53319644 | AST.resultn        | =  | Missing     | Missing            |         | -0.002001237 | 1662         |      |
| age.yrs            | >= | 51.53319644 | AST.resultn        | <  | 57.5        | Missing            |         | -0.002778383 | 1662         |      |
| age.yrs            | >= | 51.53319644 | AST.resultn        | >= | 57.5        | psc.yrs.dur        | =       | Missing      | -0.000939137 | 1662 |
| age.yrs            | >= | 51.53319644 | AST.resultn        | >= | 57.5        | psc.yrs.dur        | <       | 0.73100616   | -0.001657301 | 1662 |
| age.yrs            | >= | 51.53319644 | AST.resultn        | >= | 57.5        | psc.yrs.dur        | >=      | 0.73100616   | 0            | 1662 |
| ALB.resultn        | =  | Missing     |                    |    |             | Missing            |         | -0.001713316 | 1663         |      |
| ALB.resultn        | <  | 2.965       |                    |    |             | Missing            |         | -0.000406262 | 1663         |      |
| ALB.resultn        | >= | 2.965       | Hemoglobin.resultn | =  | Missing     | TBILI.resultn      | =       | Missing      | -0.001564313 | 1663 |
| ALB.resultn        | >= | 2.965       | Hemoglobin.resultn | =  | Missing     | TBILI.resultn      | <       | 0.95         | -0.002464978 | 1663 |
| ALB.resultn        | >= | 2.965       | Hemoglobin.resultn | =  | Missing     | TBILI.resultn      | >=      | 0.95         | 0            | 1663 |
| ALB.resultn        | >= | 2.965       | Hemoglobin.resultn | <  | 12.25       |                    | Missing | -0.002172272 | 1663         |      |
| ALB.resultn        | >= | 2.965       | Hemoglobin.resultn | >= | 12.25       |                    | Missing | -0.00172144  | 1663         |      |
| psc.yrs.dur        | =  | Missing     |                    |    |             | Missing            |         | 0.000958367  | 1664         |      |
| psc.yrs.dur        | <  | 15.71937029 | TBILI.resultn      | =  | Missing     | Missing            |         | 0.000978212  | 1664         |      |
| psc.yrs.dur        | <  | 15.71937029 | TBILI.resultn      | <  | 3.75        | ALB.resultn        | =       | Missing      | 0            | 1664 |
| psc.yrs.dur        | <  | 15.71937029 | TBILI.resultn      | <  | 3.75        | ALB.resultn        | <       | 3.135        | 0.002186405  | 1664 |
| psc.yrs.dur        | <  | 15.71937029 | TBILI.resultn      | <  | 3.75        | ALB.resultn        | >=      | 3.135        | 0.000824234  | 1664 |
| psc.yrs.dur        | <  | 15.71937029 | TBILI.resultn      | >= | 3.75        |                    | Missing | 0.00069606   | 1664         |      |
| psc.yrs.dur        | >= | 15.71937029 |                    |    |             | Missing            |         | 0.003423478  | 1664         |      |
| ALB.resultn        | =  | Missing     |                    |    |             | Missing            |         | -0.00235159  | 1665         |      |
| ALB.resultn        | <  | 2.915       |                    |    |             | Missing            |         | -3.97E-05    | 1665         |      |
| ALB.resultn        | >= | 2.915       | TBILI.resultn      | =  | Missing     | Missing            |         | -0.002442757 | 1665         |      |
| ALB.resultn        | >= | 2.915       | TBILI.resultn      | <  | 0.85        | Missing            |         | -0.002945364 | 1665         |      |
| ALB.resultn        | >= | 2.915       | TBILI.resultn      | >= | 0.85        | Hemoglobin.resultn | =       | Missing      | 0            | 1665 |
| ALB.resultn        | >= | 2.915       | TBILI.resultn      | >= | 0.85        | Hemoglobin.resultn | <       | 13.75        | -0.00143032  | 1665 |
| ALB.resultn        | >= | 2.915       | TBILI.resultn      | >= | 0.85        | Hemoglobin.resultn | >=      | 13.75        | -0.002612435 | 1665 |

|               |    |                            |    |                         |         |              |              |      |
|---------------|----|----------------------------|----|-------------------------|---------|--------------|--------------|------|
| AST.resultn   | =  | Missing                    |    |                         | Missing | -0.002569587 | 1666         |      |
| AST.resultn   | <  | 139.5 age.yrs              | =  | Missing                 | Missing | -0.001763712 | 1666         |      |
| AST.resultn   | <  | 139.5 age.yrs              | <  | 48.96919918             | Missing | -0.002044739 | 1666         |      |
| AST.resultn   | <  | 139.5 age.yrs              | >= | 48.96919918 AST.resultn | =       | Missing      | -0.001320164 | 1666 |
| AST.resultn   | <  | 139.5 age.yrs              | >= | 48.96919918 AST.resultn | <       | 51.5         | -0.002548223 | 1666 |
| AST.resultn   | <  | 139.5 age.yrs              | >= | 48.96919918 AST.resultn | >=      | 51.5         | 0            | 1666 |
| AST.resultn   | >= | 139.5                      |    |                         | Missing | -0.002172609 | 1666         |      |
| psc.yrs.dur   | =  | Missing                    |    |                         |         | 0.00104384   | 1667         |      |
| psc.yrs.dur   | <  | 6.410677618 TBILL.resultn  | =  | Missing                 |         | 0            | 1667         |      |
| psc.yrs.dur   | <  | 6.410677618 TBILL.resultn  | <  | 1.75                    |         | 0.001016259  | 1667         |      |
| psc.yrs.dur   | <  | 6.410677618 TBILL.resultn  | >= | 1.75                    |         | 0.000342224  | 1667         |      |
| psc.yrs.dur   | >= | 6.410677618 psc.yrs.dur    | =  | Missing                 |         | 0.002036526  | 1667         |      |
| psc.yrs.dur   | >= | 6.410677618 psc.yrs.dur    | <  | 9.58384668              |         | 0.003552344  | 1667         |      |
| psc.yrs.dur   | >= | 6.410677618 psc.yrs.dur    | >= | 9.58384668              |         | 0.001245665  | 1667         |      |
| TBILL.resultn | =  | Missing                    |    |                         |         | -0.002568571 | 1668         |      |
| TBILL.resultn | <  | 1.65 age.yrs               | =  | Missing                 |         | -0.002020226 | 1668         |      |
| TBILL.resultn | <  | 1.65 age.yrs               | <  | 69.84257358             |         | -0.002122776 | 1668         |      |
| TBILL.resultn | <  | 1.65 age.yrs               | >= | 69.84257358             |         | 0            | 1668         |      |
| TBILL.resultn | >= | 1.65 PLT.resultn           | =  | Missing                 |         | -0.001139498 | 1668         |      |
| TBILL.resultn | >= | 1.65 PLT.resultn           | <  | 217                     |         | 2.92E-05     | 1668         |      |
| TBILL.resultn | >= | 1.65 PLT.resultn           | >= | 217                     |         | -0.002029971 | 1668         |      |
| age.yrs       | =  | Missing                    |    |                         |         | -0.000689271 | 1669         |      |
| age.yrs       | <  | 63.31143053 psc.yrs.dur    | =  | Missing                 |         | -0.000786147 | 1669         |      |
| age.yrs       | <  | 63.31143053 psc.yrs.dur    | <  | 1.916495551             |         | -0.001144391 | 1669         |      |
| age.yrs       | <  | 63.31143053 psc.yrs.dur    | >= | 1.916495551             |         | 0            | 1669         |      |
| age.yrs       | >= | 63.31143053 ALB.resultn    | =  | Missing                 |         | 0.00023912   | 1669         |      |
| age.yrs       | >= | 63.31143053 ALB.resultn    | <  | 4                       |         | 0.001526069  | 1669         |      |
| age.yrs       | >= | 63.31143053 ALB.resultn    | >= | 4                       |         | -0.001433913 | 1669         |      |
| ALK.times.uln | =  | Missing PLT.resultn        | =  | Missing                 |         | 0            | 1670         |      |
| ALK.times.uln | =  | Missing PLT.resultn        | <  | 206                     |         | 0.002389106  | 1670         |      |
| ALK.times.uln | =  | Missing PLT.resultn        | >= | 206                     |         | 0.000494756  | 1670         |      |
| ALK.times.uln | <  | 3.593257185                |    |                         |         | 0.000480397  | 1670         |      |
| ALK.times.uln | >= | 3.593257185 PLT.resultn    | =  | Missing                 |         | 0.001763038  | 1670         |      |
| ALK.times.uln | >= | 3.593257185 PLT.resultn    | <  | 273                     |         | 0.003124945  | 1670         |      |
| ALK.times.uln | >= | 3.593257185 PLT.resultn    | >= | 273                     |         | 0.001107305  | 1670         |      |
| ALB.resultn   | =  | Missing                    |    |                         | Missing | 0.000609942  | 1671         |      |
| ALB.resultn   | <  | 2.915                      |    |                         | Missing | 0.00096134   | 1671         |      |
| ALB.resultn   | >= | 2.915 PLT.resultn          | =  | Missing                 | Missing | 0.000279499  | 1671         |      |
| ALB.resultn   | >= | 2.915 PLT.resultn          | <  | 249.5 ALK.times.uln     | =       | Missing      | 0            | 1671 |
| ALB.resultn   | >= | 2.915 PLT.resultn          | <  | 249.5 ALK.times.uln     | <       | 2.85059761   | -0.000224225 | 1671 |
| ALB.resultn   | >= | 2.915 PLT.resultn          | <  | 249.5 ALK.times.uln     | >=      | 2.85059761   | 0.002658766  | 1671 |
| ALB.resultn   | >= | 2.915 PLT.resultn          | >= | 249.5                   | Missing | -0.001043864 | 1671         |      |
| psc.yrs.dur   | =  | Missing                    |    |                         |         | 0.000490774  | 1672         |      |
| psc.yrs.dur   | <  | 6.410677618 psc.yrs.dur    | =  | Missing                 |         | 0.000280094  | 1672         |      |
| psc.yrs.dur   | <  | 6.410677618 psc.yrs.dur    | <  | 0.043805613             |         | 0.001533512  | 1672         |      |
| psc.yrs.dur   | <  | 6.410677618 psc.yrs.dur    | >= | 0.043805613             |         | 0            | 1672         |      |
| psc.yrs.dur   | >= | 6.410677618 Sodium.resultn | =  | Missing                 |         | 0.001809031  | 1672         |      |
| psc.yrs.dur   | >= | 6.410677618 Sodium.resultn | <  | 138.5                   |         | 0.003590414  | 1672         |      |
| psc.yrs.dur   | >= | 6.410677618 Sodium.resultn | >= | 138.5                   |         | 0.000502683  | 1672         |      |
| psc.yrs.dur   | =  | Missing                    |    |                         |         | 0.000807976  | 1673         |      |
| psc.yrs.dur   | <  | 7.823408624 PLT.resultn    | =  | Missing                 |         | 0            | 1673         |      |
| psc.yrs.dur   | <  | 7.823408624 PLT.resultn    | <  | 249.5                   |         | 0.001564381  | 1673         |      |
| psc.yrs.dur   | <  | 7.823408624 PLT.resultn    | >= | 249.5                   |         | 0.000184998  | 1673         |      |
| psc.yrs.dur   | >= | 7.823408624 TBILL.resultn  | =  | Missing                 |         | 0.001788637  | 1673         |      |
| psc.yrs.dur   | >= | 7.823408624 TBILL.resultn  | <  | 0.95                    |         | 0.000977161  | 1673         |      |
| psc.yrs.dur   | >= | 7.823408624 TBILL.resultn  | >= | 0.95                    |         | 0.003264048  | 1673         |      |
| PLT.resultn   | =  | Missing TBILL.resultn      | =  | Missing                 |         | 0.001505872  | 1674         |      |
| PLT.resultn   | =  | Missing TBILL.resultn      | <  | 0.65                    |         | -3.14E-05    | 1674         |      |
| PLT.resultn   | =  | Missing TBILL.resultn      | >= | 0.65                    |         | 0.003881639  | 1674         |      |
| PLT.resultn   | <  | 417 ALB.resultn            | =  | Missing                 |         | 0            | 1674         |      |
| PLT.resultn   | <  | 417 ALB.resultn            | <  | 3.135                   |         | 0.000569317  | 1674         |      |
| PLT.resultn   | <  | 417 ALB.resultn            | >= | 3.135                   |         | 0.000732547  | 1674         |      |

|                    |    |                         |                |                                |                     |             |              |              |      |
|--------------------|----|-------------------------|----------------|--------------------------------|---------------------|-------------|--------------|--------------|------|
| PLT.resultn        | >= | 417                     |                |                                |                     |             |              | 0.003865702  | 1674 |
| TBILL.resultn      | =  | Missing                 |                |                                |                     |             |              | -0.00088266  | 1675 |
| TBILL.resultn      | <  | 2.05 age.yrs            | =              | Missing                        |                     |             |              | -0.001844712 | 1675 |
| TBILL.resultn      | <  | 2.05 age.yrs            | <              | 62.47912389                    |                     |             |              | -0.00205077  | 1675 |
| TBILL.resultn      | <  | 2.05 age.yrs            | >=             | 62.47912389                    |                     |             |              | 0            | 1675 |
| TBILL.resultn      | >= | 2.05 Hemoglobin.resultn | =              | Missing                        |                     |             |              | -0.001120374 | 1675 |
| TBILL.resultn      | >= | 2.05 Hemoglobin.resultn | <              | 12.75                          |                     |             |              | -0.000184577 | 1675 |
| TBILL.resultn      | >= | 2.05 Hemoglobin.resultn | >=             | 12.75                          |                     |             |              | -0.001705247 | 1675 |
| TBILL.resultn      | =  | Missing                 |                |                                |                     |             |              | -0.001175068 | 1676 |
| TBILL.resultn      | <  | 1.95 psc.yrs.dur        | =              | Missing                        |                     |             |              | -0.001727842 | 1676 |
| TBILL.resultn      | <  | 1.95 psc.yrs.dur        | <              | 6.410677618                    |                     |             |              | -0.001953999 | 1676 |
| TBILL.resultn      | <  | 1.95 psc.yrs.dur        | >=             | 6.410677618                    |                     |             |              | 0            | 1676 |
| TBILL.resultn      | >= | 1.95 PLT.resultn        | =              | Missing                        |                     |             |              | -0.000883175 | 1676 |
| TBILL.resultn      | >= | 1.95 PLT.resultn        | <              | 220                            |                     |             |              | 0.00019306   | 1676 |
| TBILL.resultn      | >= | 1.95 PLT.resultn        | >=             | 220                            |                     |             |              | -0.001555821 | 1676 |
| ALK.times.uln      | =  | Missing                 | Sodium.resultn | =                              | Missing             |             | Missing      | -0.001636616 | 1677 |
| ALK.times.uln      | =  | Missing                 | Sodium.resultn | <                              | 140.5 TBILL.resultn | =           | Missing      | -0.001551504 | 1677 |
| ALK.times.uln      | =  | Missing                 | Sodium.resultn | <                              | 140.5 TBILL.resultn | <           | 0.95         | -0.002689273 | 1677 |
| ALK.times.uln      | =  | Missing                 | Sodium.resultn | <                              | 140.5 TBILL.resultn | >=          | 0.95         | 0            | 1677 |
| ALK.times.uln      | =  | Missing                 | Sodium.resultn | >=                             | 140.5               |             | Missing      | -0.002398655 | 1677 |
| ALK.times.uln      | <  | 5.446215139             |                |                                |                     |             | Missing      | -0.002168707 | 1677 |
| ALK.times.uln      | >= | 5.446215139             |                |                                |                     |             | Missing      | -0.000721423 | 1677 |
| ALB.resultn        | =  | Missing                 |                |                                |                     |             | Missing      | 0.00101014   | 1678 |
| ALB.resultn        | <  | 2.95                    |                |                                |                     |             | Missing      | 0.002402551  | 1678 |
| ALB.resultn        | >= | 2.95 TBILL.resultn      | =              | Missing                        |                     |             | Missing      | 0.000743936  | 1678 |
| ALB.resultn        | >= | 2.95 TBILL.resultn      | <              | 3.1 PLT.resultn                | =                   | Missing     |              | 0            | 1678 |
| ALB.resultn        | >= | 2.95 TBILL.resultn      | <              | 3.1 PLT.resultn                | <                   | 209.5       | 0.002059965  | 1678         | 1678 |
| ALB.resultn        | >= | 2.95 TBILL.resultn      | <              | 3.1 PLT.resultn                | >=                  | 209.5       | 0.000527371  | 1678         | 1678 |
| ALB.resultn        | >= | 2.95 TBILL.resultn      | >=             | 3.1                            |                     |             | Missing      | 0.000316149  | 1678 |
| ALK.times.uln      | =  | Missing                 |                |                                |                     |             | Missing      | -0.002211594 | 1679 |
| ALK.times.uln      | <  | 5.462893197 PLT.resultn | =              | Missing                        |                     |             | Missing      | -0.00090597  | 1679 |
| ALK.times.uln      | <  | 5.462893197 PLT.resultn | <              | 209.5 psc.yrs.dur              | =                   | Missing     |              | -0.001882454 | 1679 |
| ALK.times.uln      | <  | 5.462893197 PLT.resultn | <              | 209.5 psc.yrs.dur              | <                   | 1.942505133 | -0.003047783 | 1679         | 1679 |
| ALK.times.uln      | <  | 5.462893197 PLT.resultn | <              | 209.5 psc.yrs.dur              | >=                  | 1.942505133 | 0            | 1679         | 1679 |
| ALK.times.uln      | <  | 5.462893197 PLT.resultn | >=             | 209.5                          |                     |             | Missing      | -0.002866172 | 1679 |
| ALK.times.uln      | >= | 5.462893197             |                |                                |                     |             | Missing      | -0.00118332  | 1679 |
| ALK.times.uln      | =  | Missing                 |                |                                |                     |             | Missing      | 0.000727946  | 1680 |
| ALK.times.uln      | <  | 3.336440678             |                |                                |                     |             | Missing      | 0.000333793  | 1680 |
| ALK.times.uln      | >= | 3.336440678 PLT.resultn | =              | Missing                        |                     |             | Missing      | 0.001518342  | 1680 |
| ALK.times.uln      | >= | 3.336440678 PLT.resultn | <              | 242                            |                     |             | Missing      | 0.003273775  | 1680 |
| ALK.times.uln      | >= | 3.336440678 PLT.resultn | >=             | 242 psc.yrs.dur                | =                   | Missing     |              | 0.001002038  | 1680 |
| ALK.times.uln      | >= | 3.336440678 PLT.resultn | >=             | 242 psc.yrs.dur                | <                   | 0.10403833  | 0.00340693   | 1680         | 1680 |
| ALK.times.uln      | >= | 3.336440678 PLT.resultn | >=             | 242 psc.yrs.dur                | >=                  | 0.10403833  | 0            | 1680         | 1680 |
| TBILL.resultn      | =  | Missing                 |                |                                |                     |             | Missing      | 0.000411117  | 1681 |
| TBILL.resultn      | <  | 0.95                    |                |                                |                     |             | Missing      | -0.002653411 | 1681 |
| TBILL.resultn      | >= | 0.95 psc.yrs.dur        | =              | Missing                        |                     |             | Missing      | -0.001686623 | 1681 |
| TBILL.resultn      | >= | 0.95 psc.yrs.dur        | <              | 7.314168378 Hemoglobin.resultn | =                   | Missing     |              | 0            | 1681 |
| TBILL.resultn      | >= | 0.95 psc.yrs.dur        | <              | 7.314168378 Hemoglobin.resultn | <                   | 12.05       | -0.001550507 | 1681         | 1681 |
| TBILL.resultn      | >= | 0.95 psc.yrs.dur        | <              | 7.314168378 Hemoglobin.resultn | >=                  | 12.05       | -0.002654309 | 1681         | 1681 |
| TBILL.resultn      | >= | 0.95 psc.yrs.dur        | >=             | 7.314168378                    |                     |             | Missing      | 0.000399355  | 1681 |
| TBILL.resultn      | =  | Missing                 |                |                                |                     |             |              | -0.002973772 | 1682 |
| TBILL.resultn      | <  | 2.05 age.yrs            | =              | Missing                        |                     |             |              | -0.002204982 | 1682 |
| TBILL.resultn      | <  | 2.05 age.yrs            | <              | 69.84257358                    |                     |             |              | -0.002371187 | 1682 |
| TBILL.resultn      | <  | 2.05 age.yrs            | >=             | 69.84257358                    |                     |             |              | 0            | 1682 |
| TBILL.resultn      | >= | 2.05 Hemoglobin.resultn | =              | Missing                        |                     |             |              | -0.001654174 | 1682 |
| TBILL.resultn      | >= | 2.05 Hemoglobin.resultn | <              | 12.95                          |                     |             |              | -0.00135955  | 1682 |
| TBILL.resultn      | >= | 2.05 Hemoglobin.resultn | >=             | 12.95                          |                     |             |              | -0.001975583 | 1682 |
| Hemoglobin.resultn | =  | Missing                 | TBILL.resultn  | =                              | Missing             |             |              | -0.001075516 | 1683 |
| Hemoglobin.resultn | =  | Missing                 | TBILL.resultn  | <                              | 1.55                |             |              | -0.001446269 | 1683 |
| Hemoglobin.resultn | =  | Missing                 | TBILL.resultn  | >=                             | 1.55                |             |              | 0.000704099  | 1683 |
| Hemoglobin.resultn | <  | 11.25                   |                |                                |                     |             |              | -0.001949664 | 1683 |
| Hemoglobin.resultn | >= | 11.25 TBILL.resultn     | =              | Missing                        |                     |             |              | -0.001448782 | 1683 |

|                    |    |             |               |    |             |                |         |              |              |      |
|--------------------|----|-------------|---------------|----|-------------|----------------|---------|--------------|--------------|------|
| Hemoglobin.resultn | >= | 11.25       | TBILL.resultn | <  | 2.95        |                |         | -0.001537664 | 1683         |      |
| Hemoglobin.resultn | >= | 11.25       | TBILL.resultn | >= | 2.95        |                |         | 0            | 1683         |      |
| age.yrs            | =  | Missing     |               |    |             |                |         | 0.000398875  | 1684         |      |
| age.yrs            | <  | 63.16084873 | PLT.resultn   | =  | Missing     |                |         | 0            | 1684         |      |
| age.yrs            | <  | 63.16084873 | PLT.resultn   | <  | 512         |                |         | 0.000232089  | 1684         |      |
| age.yrs            | <  | 63.16084873 | PLT.resultn   | >= | 512         |                |         | 0.00186993   | 1684         |      |
| age.yrs            | >= | 63.16084873 | TBILL.resultn | =  | Missing     |                |         | 0.001279953  | 1684         |      |
| age.yrs            | >= | 63.16084873 | TBILL.resultn | <  | 0.65        |                |         | -0.000572303 | 1684         |      |
| age.yrs            | >= | 63.16084873 | TBILL.resultn | >= | 0.65        |                |         | 0.002206082  | 1684         |      |
| TBILL.resultn      | =  | Missing     |               |    |             | Missing        |         | -1.97E-05    | 1685         |      |
| TBILL.resultn      | <  | 2.35        | age.yrs       | =  | Missing     | Missing        |         | 0.00083134   | 1685         |      |
| TBILL.resultn      | <  | 2.35        | age.yrs       | <  | 69.84257358 | TBILL.resultn  | =       | Missing      | 0.000737591  | 1685 |
| TBILL.resultn      | <  | 2.35        | age.yrs       | <  | 69.84257358 | TBILL.resultn  | <       | 1.55         | 0.000811741  | 1685 |
| TBILL.resultn      | <  | 2.35        | age.yrs       | <  | 69.84257358 | TBILL.resultn  | >=      | 1.55         | 0            | 1685 |
| TBILL.resultn      | <  | 2.35        | age.yrs       | >= | 69.84257358 |                | Missing | 0.002331317  | 1685         |      |
| TBILL.resultn      | >= | 2.35        |               |    |             |                | Missing | 0.001739523  | 1685         |      |
| Sodium.resultn     | =  | Missing     | TBILL.resultn | =  | Missing     |                | Missing | -0.002512328 | 1686         |      |
| Sodium.resultn     | =  | Missing     | TBILL.resultn | <  | 1.25        |                | Missing | -0.00250207  | 1686         |      |
| Sodium.resultn     | =  | Missing     | TBILL.resultn | >= | 1.25        | age.yrs        | =       | Missing      | -0.000699134 | 1686 |
| Sodium.resultn     | =  | Missing     | TBILL.resultn | >= | 1.25        | age.yrs        | <       | 46.87748118  | -0.001398268 | 1686 |
| Sodium.resultn     | =  | Missing     | TBILL.resultn | >= | 1.25        | age.yrs        | >=      | 46.87748118  | 0            | 1686 |
| Sodium.resultn     | <  | 136.5       |               |    |             |                | Missing | 0.000214295  | 1686         |      |
| Sodium.resultn     | >= | 136.5       |               |    |             |                | Missing | -0.001846093 | 1686         |      |
| psc.yrs.dur        | =  | Missing     |               |    |             |                | Missing | -0.00230943  | 1687         |      |
| psc.yrs.dur        | <  | 6.379192334 |               |    |             |                | Missing | -0.002562037 | 1687         |      |
| psc.yrs.dur        | >= | 6.379192334 | AST.resultn   | =  | Missing     |                | Missing | -0.00087356  | 1687         |      |
| psc.yrs.dur        | >= | 6.379192334 | AST.resultn   | <  | 85.5        | psc.yrs.dur    | =       | Missing      | -0.001217641 | 1687 |
| psc.yrs.dur        | >= | 6.379192334 | AST.resultn   | <  | 85.5        | psc.yrs.dur    | <       | 8.026009582  | -0.003165867 | 1687 |
| psc.yrs.dur        | >= | 6.379192334 | AST.resultn   | <  | 85.5        | psc.yrs.dur    | >=      | 8.026009582  | 0            | 1687 |
| psc.yrs.dur        | >= | 6.379192334 | AST.resultn   | >= | 85.5        |                | Missing | -0.000128051 | 1687         |      |
| PLT.resultn        | =  | Missing     |               |    |             |                | Missing | -0.003488255 | 1688         |      |
| PLT.resultn        | <  | 249.5       | AST.resultn   | =  | Missing     |                | Missing | -0.003037076 | 1688         |      |
| PLT.resultn        | <  | 249.5       | AST.resultn   | <  | 56.5        |                | Missing | -0.004247557 | 1688         |      |
| PLT.resultn        | <  | 249.5       | AST.resultn   | >= | 56.5        | age.yrs        | =       | Missing      | -0.001692097 | 1688 |
| PLT.resultn        | <  | 249.5       | AST.resultn   | >= | 56.5        | age.yrs        | <       | 51.64818617  | -0.002625668 | 1688 |
| PLT.resultn        | <  | 249.5       | AST.resultn   | >= | 56.5        | age.yrs        | >=      | 51.64818617  | 0            | 1688 |
| PLT.resultn        | >= | 249.5       |               |    |             |                | Missing | -0.004113455 | 1688         |      |
| ALK.times.uln      | =  | Missing     | TBILL.resultn | =  | Missing     |                |         | 0            | 1689         |      |
| ALK.times.uln      | =  | Missing     | TBILL.resultn | <  | 0.95        |                |         | -0.000113999 | 1689         |      |
| ALK.times.uln      | =  | Missing     | TBILL.resultn | >= | 0.95        |                |         | 0.002324064  | 1689         |      |
| ALK.times.uln      | <  | 5.963877551 |               |    |             |                |         | 0.000260055  | 1689         |      |
| ALK.times.uln      | >= | 5.963877551 | ALK.times.uln | =  | Missing     |                |         | 0.001760844  | 1689         |      |
| ALK.times.uln      | >= | 5.963877551 | ALK.times.uln | <  | 8.068738793 |                |         | 0.003583528  | 1689         |      |
| ALK.times.uln      | >= | 5.963877551 | ALK.times.uln | >= | 8.068738793 |                |         | -6.18E-05    | 1689         |      |
| ALB.resultn        | =  | Missing     |               |    |             |                | Missing | -0.00017704  | 1690         |      |
| ALB.resultn        | <  | 2.915       |               |    |             |                | Missing | 0.001074428  | 1690         |      |
| ALB.resultn        | >= | 2.915       | psc.yrs.dur   | =  | Missing     |                | Missing | -0.000181928 | 1690         |      |
| ALB.resultn        | >= | 2.915       | psc.yrs.dur   | <  | 6.783025325 |                | Missing | -0.000421351 | 1690         |      |
| ALB.resultn        | >= | 2.915       | psc.yrs.dur   | >= | 6.783025325 | Sodium.resultn | =       | Missing      | 0.001628112  | 1690 |
| ALB.resultn        | >= | 2.915       | psc.yrs.dur   | >= | 6.783025325 | Sodium.resultn | <       | 138.5        | 0.003256225  | 1690 |
| ALB.resultn        | >= | 2.915       | psc.yrs.dur   | >= | 6.783025325 | Sodium.resultn | >=      | 138.5        | 0            | 1690 |
| ALB.resultn        | =  | Missing     |               |    |             |                | Missing | -0.001462733 | 1691         |      |
| ALB.resultn        | <  | 2.825       |               |    |             |                | Missing | 0.0002743    | 1691         |      |
| ALB.resultn        | >= | 2.825       | age.yrs       | =  | Missing     |                | Missing | -0.001363625 | 1691         |      |
| ALB.resultn        | >= | 2.825       | age.yrs       | <  | 49.22655715 |                | Missing | -0.001665146 | 1691         |      |
| ALB.resultn        | >= | 2.825       | age.yrs       | >= | 49.22655715 | TBILL.resultn  | =       | Missing      | -0.000828029 | 1691 |
| ALB.resultn        | >= | 2.825       | age.yrs       | >= | 49.22655715 | TBILL.resultn  | <       | 0.85         | -0.001380048 | 1691 |
| ALB.resultn        | >= | 2.825       | age.yrs       | >= | 49.22655715 | TBILL.resultn  | >=      | 0.85         | 0            | 1691 |
| ALB.resultn        | =  | Missing     |               |    |             |                | Missing | -0.000499998 | 1692         |      |
| ALB.resultn        | <  | 2.915       |               |    |             |                | Missing | 0.000488152  | 1692         |      |
| ALB.resultn        | >= | 2.915       | ALB.resultn   | =  | Missing     |                | Missing | -0.000761063 | 1692         |      |
| ALB.resultn        | >= | 2.915       | ALB.resultn   | <  | 3.165       |                | Missing | -0.001206379 | 1692         |      |



|               |    |             |                    |    |             |               |    |             |              |      |
|---------------|----|-------------|--------------------|----|-------------|---------------|----|-------------|--------------|------|
| ALB.resultn   | >= | 2.915       | ALB.resultn        | >= | 3.165       | AST.resultn   | =  | Missing     | -0.000739341 | 1692 |
| ALB.resultn   | >= | 2.915       | ALB.resultn        | >= | 3.165       | AST.resultn   | <  | 52.5        | -0.001515648 | 1692 |
| ALB.resultn   | >= | 2.915       | ALB.resultn        | >= | 3.165       | AST.resultn   | >= | 52.5        | 0            | 1692 |
| TBILL.resultn | =  | Missing     |                    |    |             |               |    | Missing     | -0.003241142 | 1693 |
| TBILL.resultn | <  | 2.45        | Sodium.resultn     | =  | Missing     |               |    | Missing     | -0.00402657  | 1693 |
| TBILL.resultn | <  | 2.45        | Sodium.resultn     | <  | 142.5       |               |    | Missing     | -0.00359125  | 1693 |
| TBILL.resultn | <  | 2.45        | Sodium.resultn     | >= | 142.5       | age.yrs       | =  | Missing     | -0.002160404 | 1693 |
| TBILL.resultn | <  | 2.45        | Sodium.resultn     | >= | 142.5       | age.yrs       | <  | 51.72895277 | -0.004320808 | 1693 |
| TBILL.resultn | <  | 2.45        | Sodium.resultn     | >= | 142.5       | age.yrs       | >= | 51.72895277 | 0            | 1693 |
| TBILL.resultn | >= | 2.45        |                    |    |             |               |    | Missing     | -0.002624623 | 1693 |
| ALB.resultn   | =  | Missing     |                    |    |             |               |    | Missing     | -0.002061204 | 1694 |
| ALB.resultn   | <  | 2.825       |                    |    |             |               |    | Missing     | -0.000201087 | 1694 |
| ALB.resultn   | >= | 2.825       | Hemoglobin.resultn | =  | Missing     | TBILL.resultn | =  | Missing     | -0.001111982 | 1694 |
| ALB.resultn   | >= | 2.825       | Hemoglobin.resultn | =  | Missing     | TBILL.resultn | <  | 0.95        | -0.002090527 | 1694 |
| ALB.resultn   | >= | 2.825       | Hemoglobin.resultn | =  | Missing     | TBILL.resultn | >= | 0.95        | 0            | 1694 |
| ALB.resultn   | >= | 2.825       | Hemoglobin.resultn | <  | 11.75       |               |    | Missing     | -0.001637469 | 1694 |
| ALB.resultn   | >= | 2.825       | Hemoglobin.resultn | >= | 11.75       |               |    | Missing     | -0.001289048 | 1694 |
| ALK.times.uln | =  | Missing     | TBILL.resultn      | =  | Missing     |               |    |             | -8.84E-05    | 1695 |
| ALK.times.uln | =  | Missing     | TBILL.resultn      | <  | 1.35        |               |    |             | -0.000557985 | 1695 |
| ALK.times.uln | =  | Missing     | TBILL.resultn      | >= | 1.35        |               |    |             | 0.002071953  | 1695 |
| ALK.times.uln | <  | 5.462893197 | TBILL.resultn      | =  | Missing     |               |    |             | 0.000145428  | 1695 |
| ALK.times.uln | <  | 5.462893197 | TBILL.resultn      | <  | 1.15        |               |    |             | 0.000186062  | 1695 |
| ALK.times.uln | <  | 5.462893197 | TBILL.resultn      | >= | 1.15        |               |    |             | 0            | 1695 |
| ALK.times.uln | >= | 5.462893197 |                    |    |             |               |    |             | 0.00177416   | 1695 |
| ALB.resultn   | =  | Missing     |                    |    |             |               |    | Missing     | -0.002477561 | 1696 |
| ALB.resultn   | <  | 2.915       |                    |    |             |               |    | Missing     | -0.000243074 | 1696 |
| ALB.resultn   | >= | 2.915       | age.yrs            | =  | Missing     |               |    | Missing     | -0.002015293 | 1696 |
| ALB.resultn   | >= | 2.915       | age.yrs            | <  | 53.64681725 |               |    | Missing     | -0.002362969 | 1696 |
| ALB.resultn   | >= | 2.915       | age.yrs            | >= | 53.64681725 | TBILL.resultn | =  | Missing     | -0.001003874 | 1696 |
| ALB.resultn   | >= | 2.915       | age.yrs            | >= | 53.64681725 | TBILL.resultn | <  | 1.15        | -0.001322175 | 1696 |
| ALB.resultn   | >= | 2.915       | age.yrs            | >= | 53.64681725 | TBILL.resultn | >= | 1.15        | 0            | 1696 |
| AST.resultn   | =  | Missing     |                    |    |             |               |    | Missing     | -0.005558087 | 1697 |
| AST.resultn   | <  | 52.5        |                    |    |             |               |    | Missing     | -0.005549022 | 1697 |
| AST.resultn   | >= | 52.5        | AST.resultn        | =  | Missing     |               |    | Missing     | -0.004109754 | 1697 |
| AST.resultn   | >= | 52.5        | AST.resultn        | <  | 72.5        | age.yrs       | =  | Missing     | -0.003172434 | 1697 |
| AST.resultn   | >= | 52.5        | AST.resultn        | <  | 72.5        | age.yrs       | <  | 53.18822724 | -0.004326046 | 1697 |
| AST.resultn   | >= | 52.5        | AST.resultn        | <  | 72.5        | age.yrs       | >= | 53.18822724 | 0            | 1697 |
| AST.resultn   | >= | 52.5        | AST.resultn        | >= | 72.5        |               |    | Missing     | -0.004624137 | 1697 |
| psc.yrs.dur   | =  | Missing     |                    |    |             |               |    | Missing     | 0.000448568  | 1698 |
| psc.yrs.dur   | <  | 6.410677618 |                    |    |             |               |    | Missing     | 0.000266346  | 1698 |
| psc.yrs.dur   | >= | 6.410677618 | psc.yrs.dur        | =  | Missing     |               |    | Missing     | 0.001627648  | 1698 |
| psc.yrs.dur   | >= | 6.410677618 | psc.yrs.dur        | <  | 8.262833676 |               |    | Missing     | 0.003210801  | 1698 |
| psc.yrs.dur   | >= | 6.410677618 | psc.yrs.dur        | >= | 8.262833676 | PLT.resultn   | =  | Missing     | 0.000870488  | 1698 |
| psc.yrs.dur   | >= | 6.410677618 | psc.yrs.dur        | >= | 8.262833676 | PLT.resultn   | <  | 223.5       | 0.001740977  | 1698 |
| psc.yrs.dur   | >= | 6.410677618 | psc.yrs.dur        | >= | 8.262833676 | PLT.resultn   | >= | 223.5       | 0            | 1698 |
| ALB.resultn   | =  | Missing     | psc.yrs.dur        | =  | Missing     |               |    |             | 0.002157632  | 1699 |
| ALB.resultn   | =  | Missing     | psc.yrs.dur        | <  | 0.251882272 |               |    |             | 0.005825607  | 1699 |
| ALB.resultn   | =  | Missing     | psc.yrs.dur        | >= | 0.251882272 |               |    |             | 0            | 1699 |
| ALB.resultn   | <  | 2.95        |                    |    |             |               |    |             | 0.002144232  | 1699 |
| ALB.resultn   | >= | 2.95        | PLT.resultn        | =  | Missing     |               |    |             | -2.78E-05    | 1699 |
| ALB.resultn   | >= | 2.95        | PLT.resultn        | <  | 182.5       |               |    |             | 0.002658236  | 1699 |
| ALB.resultn   | >= | 2.95        | PLT.resultn        | >= | 182.5       |               |    |             | 0.000544406  | 1699 |
| ALB.resultn   | =  | Missing     |                    |    |             |               |    | Missing     | -0.001001524 | 1700 |
| ALB.resultn   | <  | 2.965       |                    |    |             |               |    | Missing     | 0.000927211  | 1700 |
| ALB.resultn   | >= | 2.965       | TBILL.resultn      | =  | Missing     |               |    | Missing     | -0.000711914 | 1700 |
| ALB.resultn   | >= | 2.965       | TBILL.resultn      | <  | 2.6         | AST.resultn   | =  | Missing     | -0.000680125 | 1700 |
| ALB.resultn   | >= | 2.965       | TBILL.resultn      | <  | 2.6         | AST.resultn   | <  | 47.5        | -0.001504276 | 1700 |
| ALB.resultn   | >= | 2.965       | TBILL.resultn      | <  | 2.6         | AST.resultn   | >= | 47.5        | 0            | 1700 |
| ALB.resultn   | >= | 2.965       | TBILL.resultn      | >= | 2.6         |               |    | Missing     | -0.001045706 | 1700 |
| psc.yrs.dur   | =  | Missing     |                    |    |             |               |    |             | 4.56E-05     | 1701 |
| psc.yrs.dur   | <  | 6.410677618 | ALK.times.uln      | =  | Missing     |               |    |             | 0            | 1701 |
| psc.yrs.dur   | <  | 6.410677618 | ALK.times.uln      | <  | 7.868810472 |               |    |             | -7.35E-05    | 1701 |

|               |    |                           |    |                         |    |             |              |      |
|---------------|----|---------------------------|----|-------------------------|----|-------------|--------------|------|
| psc.yrs.dur   | <  | 6.410677618 ALK.times.uln | >= | 7.868810472             |    |             | -0.000587501 | 1701 |
| psc.yrs.dur   | >= | 6.410677618 psc.yrs.dur   | =  | Missing                 |    |             | 0.000868084  | 1701 |
| psc.yrs.dur   | >= | 6.410677618 psc.yrs.dur   | <  | 8.769336071             |    |             | 0.002669429  | 1701 |
| psc.yrs.dur   | >= | 6.410677618 psc.yrs.dur   | >= | 8.769336071             |    |             | 0.000117524  | 1701 |
| psc.yrs.dur   | =  | Missing                   |    |                         |    |             | 0.000880603  | 1702 |
| psc.yrs.dur   | <  | 6.410677618 AST.resultn   | =  | Missing                 |    |             | 0.000821488  | 1702 |
| psc.yrs.dur   | <  | 6.410677618 AST.resultn   | <  | 139.5                   |    |             | 0.000912285  | 1702 |
| psc.yrs.dur   | <  | 6.410677618 AST.resultn   | >= | 139.5                   |    |             | 0            | 1702 |
| psc.yrs.dur   | >= | 6.410677618 AST.resultn   | =  | Missing                 |    |             | 0.001250492  | 1702 |
| psc.yrs.dur   | >= | 6.410677618 AST.resultn   | <  | 43                      |    |             | 3.39E-05     | 1702 |
| psc.yrs.dur   | >= | 6.410677618 AST.resultn   | >= | 43                      |    |             | 0.002619209  | 1702 |
| TBILL.resultn | =  | Missing                   |    |                         |    | Missing     | 0.001885136  | 1703 |
| TBILL.resultn | <  | 2.85 ALK.times.uln        | =  | Missing                 |    | Missing     | 0.000698299  | 1703 |
| TBILL.resultn | <  | 2.85 ALK.times.uln        | <  | 5.412513212 ALB.resultn | =  | Missing     | 0            | 1703 |
| TBILL.resultn | <  | 2.85 ALK.times.uln        | <  | 5.412513212 ALB.resultn | <  | 3.185       | -4.67E-05    | 1703 |
| TBILL.resultn | <  | 2.85 ALK.times.uln        | <  | 5.412513212 ALB.resultn | >= | 3.185       | 0.000682065  | 1703 |
| TBILL.resultn | <  | 2.85 ALK.times.uln        | >= | 5.412513212             |    | Missing     | 0.001914147  | 1703 |
| TBILL.resultn | >= | 2.85                      |    |                         |    | Missing     | 0.001889434  | 1703 |
| AST.resultn   | =  | Missing                   |    |                         |    | Missing     | -0.002228782 | 1704 |
| AST.resultn   | <  | 142 AST.resultn           | =  | Missing                 |    | Missing     | -0.001439986 | 1704 |
| AST.resultn   | <  | 142 AST.resultn           | <  | 52                      |    | Missing     | -0.001987611 | 1704 |
| AST.resultn   | <  | 142 AST.resultn           | >= | 52 age.yrs              | =  | Missing     | -0.000715904 | 1704 |
| AST.resultn   | <  | 142 AST.resultn           | >= | 52 age.yrs              | <  | 49.10198494 | -0.001215686 | 1704 |
| AST.resultn   | <  | 142 AST.resultn           | >= | 52 age.yrs              | >= | 49.10198494 | 0            | 1704 |
| AST.resultn   | >= | 142                       |    |                         |    | Missing     | -0.001794193 | 1704 |
| age.yrs       | =  | Missing                   |    |                         |    |             | 0.000113142  | 1705 |
| age.yrs       | <  | 62.47912389 ALB.resultn   | =  | Missing                 |    |             | 0            | 1705 |
| age.yrs       | <  | 62.47912389 ALB.resultn   | <  | 4.255                   |    |             | -0.000446568 | 1705 |
| age.yrs       | <  | 62.47912389 ALB.resultn   | >= | 4.255                   |    |             | 0.000663803  | 1705 |
| age.yrs       | >= | 62.47912389 AST.resultn   | =  | Missing                 |    |             | 0.001567745  | 1705 |
| age.yrs       | >= | 62.47912389 AST.resultn   | <  | 49                      |    |             | -0.000986341 | 1705 |
| age.yrs       | >= | 62.47912389 AST.resultn   | >= | 49                      |    |             | 0.005282779  | 1705 |
| ALB.resultn   | =  | Missing                   |    |                         |    | Missing     | -0.002401675 | 1706 |
| ALB.resultn   | <  | 2.825                     |    |                         |    | Missing     | -0.00084151  | 1706 |
| ALB.resultn   | >= | 2.825 PLT.resultn         | =  | Missing                 |    | Missing     | -0.001064072 | 1706 |
| ALB.resultn   | >= | 2.825 PLT.resultn         | <  | 198.5 PLT.resultn       | =  | Missing     | -0.001083554 | 1706 |
| ALB.resultn   | >= | 2.825 PLT.resultn         | <  | 198.5 PLT.resultn       | <  | 181.5       | -0.002925597 | 1706 |
| ALB.resultn   | >= | 2.825 PLT.resultn         | <  | 198.5 PLT.resultn       | >= | 181.5       | 0            | 1706 |
| ALB.resultn   | >= | 2.825 PLT.resultn         | >= | 198.5                   |    | Missing     | -0.002437807 | 1706 |
| ALK.times.uln | =  | Missing AST.resultn       | =  | Missing                 |    |             | -0.00186217  | 1707 |
| ALK.times.uln | =  | Missing AST.resultn       | <  | 99.5                    |    |             | -0.002438556 | 1707 |
| ALK.times.uln | =  | Missing AST.resultn       | >= | 99.5                    |    |             | 0            | 1707 |
| ALK.times.uln | <  | 5.963877551 TBILL.resultn | =  | Missing                 |    |             | -0.002362601 | 1707 |
| ALK.times.uln | <  | 5.963877551 TBILL.resultn | <  | 0.65                    |    |             | -0.002955736 | 1707 |
| ALK.times.uln | <  | 5.963877551 TBILL.resultn | >= | 0.65                    |    |             | -0.001944582 | 1707 |
| ALK.times.uln | >= | 5.963877551               |    |                         |    |             | -0.00059897  | 1707 |
| ALB.resultn   | =  | Missing                   |    |                         |    | Missing     | -1.61E-05    | 1708 |
| ALB.resultn   | <  | 3.34                      |    |                         |    | Missing     | 0.002247708  | 1708 |
| ALB.resultn   | >= | 3.34 ALK.times.uln        | =  | Missing Sodium.resultn  | =  | Missing     | 0            | 1708 |
| ALB.resultn   | >= | 3.34 ALK.times.uln        | =  | Missing Sodium.resultn  | <  | 139.5       | 6.46E-05     | 1708 |
| ALB.resultn   | >= | 3.34 ALK.times.uln        | =  | Missing Sodium.resultn  | >= | 139.5       | 0.002944143  | 1708 |
| ALB.resultn   | >= | 3.34 ALK.times.uln        | <  | 5.511432351             |    | Missing     | 0.00029733   | 1708 |
| ALB.resultn   | >= | 3.34 ALK.times.uln        | >= | 5.511432351             |    | Missing     | 0.002069237  | 1708 |
| TBILL.resultn | =  | Missing                   |    |                         |    | Missing     | -0.000322553 | 1709 |
| TBILL.resultn | <  | 1.65                      |    |                         |    | Missing     | 0.000358415  | 1709 |
| TBILL.resultn | >= | 1.65 psc.yrs.dur          | =  | Missing                 |    | Missing     | 0.001518898  | 1709 |
| TBILL.resultn | >= | 1.65 psc.yrs.dur          | <  | 2.20807666 AST.resultn  | =  | Missing     | 0.000871457  | 1709 |
| TBILL.resultn | >= | 1.65 psc.yrs.dur          | <  | 2.20807666 AST.resultn  | <  | 135.5       | 0.001416117  | 1709 |
| TBILL.resultn | >= | 1.65 psc.yrs.dur          | <  | 2.20807666 AST.resultn  | >= | 135.5       | 0            | 1709 |
| TBILL.resultn | >= | 1.65 psc.yrs.dur          | >= | 2.20807666              |    | Missing     | 0.002921687  | 1709 |
| PLT.resultn   | =  | Missing                   |    |                         |    | Missing     | -0.001992378 | 1710 |
| PLT.resultn   | <  | 186.5                     |    |                         |    | Missing     | 0.000227061  | 1710 |

|                |    |             |               |    |             |                |              |              |              |      |
|----------------|----|-------------|---------------|----|-------------|----------------|--------------|--------------|--------------|------|
| PLT.resultn    | >= | 186.5       | TBILL.resultn | =  | Missing     | Missing        | -0.001917667 | 1710         |              |      |
| PLT.resultn    | >= | 186.5       | TBILL.resultn | <  | 2.75        | psc.yrs.dur    | =            | Missing      | -0.001917646 | 1710 |
| PLT.resultn    | >= | 186.5       | TBILL.resultn | <  | 2.75        | psc.yrs.dur    | <            | 6.410677618  | -0.002245049 | 1710 |
| PLT.resultn    | >= | 186.5       | TBILL.resultn | <  | 2.75        | psc.yrs.dur    | >=           | 6.410677618  | 0            | 1710 |
| PLT.resultn    | >= | 186.5       | TBILL.resultn | >= | 2.75        |                | Missing      | -0.001918071 | 1710         |      |
| age.yrs        | =  | Missing     |               |    |             |                | Missing      | -0.002156964 | 1711         |      |
| age.yrs        | <  | 54.96783025 |               |    |             |                | Missing      | -0.00227425  | 1711         |      |
| age.yrs        | >= | 54.96783025 | AST.resultn   | =  | Missing     |                | Missing      | -0.001801382 | 1711         |      |
| age.yrs        | >= | 54.96783025 | AST.resultn   | <  | 51          |                | Missing      | -0.0029175   | 1711         |      |
| age.yrs        | >= | 54.96783025 | AST.resultn   | >= | 51          | psc.yrs.dur    | =            | Missing      | -0.0007899   | 1711 |
| age.yrs        | >= | 54.96783025 | AST.resultn   | >= | 51          | psc.yrs.dur    | <            | 0.454483231  | -0.001805486 | 1711 |
| age.yrs        | >= | 54.96783025 | AST.resultn   | >= | 51          | psc.yrs.dur    | >=           | 0.454483231  | 0            | 1711 |
| PLT.resultn    | =  | Missing     |               |    |             |                | Missing      | 0.000590738  | 1712         |      |
| PLT.resultn    | <  | 183         |               |    |             |                | Missing      | 0.003179139  | 1712         |      |
| PLT.resultn    | >= | 183         | ALK.times.uln | =  | Missing     | Sodium.resultn | =            | Missing      | 0            | 1712 |
| PLT.resultn    | >= | 183         | ALK.times.uln | =  | Missing     | Sodium.resultn | <            | 140.5        | 0.001736834  | 1712 |
| PLT.resultn    | >= | 183         | ALK.times.uln | =  | Missing     | Sodium.resultn | >=           | 140.5        | 0.000323017  | 1712 |
| PLT.resultn    | >= | 183         | ALK.times.uln | <  | 6.02        |                | Missing      | 0.000476898  | 1712         |      |
| PLT.resultn    | >= | 183         | ALK.times.uln | >= | 6.02        |                | Missing      | 0.001619911  | 1712         |      |
| Sodium.resultn | =  | Missing     |               |    |             |                | Missing      | -0.001594497 | 1713         |      |
| Sodium.resultn | <  | 141.5       | PLT.resultn   | =  | Missing     |                | Missing      | -0.000945119 | 1713         |      |
| Sodium.resultn | <  | 141.5       | PLT.resultn   | <  | 197.5       |                | Missing      | 0.000465137  | 1713         |      |
| Sodium.resultn | <  | 141.5       | PLT.resultn   | >= | 197.5       | PLT.resultn    | =            | Missing      | -0.001182489 | 1713 |
| Sodium.resultn | <  | 141.5       | PLT.resultn   | >= | 197.5       | PLT.resultn    | <            | 417          | -0.001357174 | 1713 |
| Sodium.resultn | <  | 141.5       | PLT.resultn   | >= | 197.5       | PLT.resultn    | >=           | 417          | 0            | 1713 |
| Sodium.resultn | >= | 141.5       |               |    |             |                | Missing      | -0.001736967 | 1713         |      |
| ALB.resultn    | =  | Missing     |               |    |             |                |              | 0.000908169  | 1714         |      |
| ALB.resultn    | <  | 3.33        | psc.yrs.dur   | =  | Missing     |                |              | 0.001964703  | 1714         |      |
| ALB.resultn    | <  | 3.33        | psc.yrs.dur   | <  | 0.610540726 |                |              | 0.000617397  | 1714         |      |
| ALB.resultn    | <  | 3.33        | psc.yrs.dur   | >= | 0.610540726 |                |              | 0.003119537  | 1714         |      |
| ALB.resultn    | >= | 3.33        | PLT.resultn   | =  | Missing     |                |              | 0            | 1714         |      |
| ALB.resultn    | >= | 3.33        | PLT.resultn   | <  | 267.5       |                |              | 0.001463517  | 1714         |      |
| ALB.resultn    | >= | 3.33        | PLT.resultn   | >= | 267.5       |                |              | 4.46E-06     | 1714         |      |
| ALB.resultn    | =  | Missing     |               |    |             |                |              | Missing      | -0.001811266 | 1715 |
| ALB.resultn    | <  | 2.915       |               |    |             |                | Missing      | -0.000297847 | 1715         |      |
| ALB.resultn    | >= | 2.915       | ALK.times.uln | =  | Missing     | age.yrs        | =            | Missing      | -0.001769289 | 1715 |
| ALB.resultn    | >= | 2.915       | ALK.times.uln | =  | Missing     | age.yrs        | <            | 54.39972621  | -0.002486568 | 1715 |
| ALB.resultn    | >= | 2.915       | ALK.times.uln | =  | Missing     | age.yrs        | >=           | 54.39972621  | 0            | 1715 |
| ALB.resultn    | >= | 2.915       | ALK.times.uln | <  | 6.338830603 |                | Missing      | -0.001523823 | 1715         |      |
| ALB.resultn    | >= | 2.915       | ALK.times.uln | >= | 6.338830603 |                | Missing      | -0.002187663 | 1715         |      |
| psc.yrs.dur    | =  | Missing     |               |    |             |                |              | 0.000244219  | 1716         |      |
| psc.yrs.dur    | <  | 7.823408624 | ALK.times.uln | =  | Missing     |                |              | 0            | 1716         |      |
| psc.yrs.dur    | <  | 7.823408624 | ALK.times.uln | <  | 5.462893197 |                |              | -7.55E-05    | 1716         |      |
| psc.yrs.dur    | <  | 7.823408624 | ALK.times.uln | >= | 5.462893197 |                |              | 0.001291988  | 1716         |      |
| psc.yrs.dur    | >= | 7.823408624 | psc.yrs.dur   | =  | Missing     |                |              | 0.002078392  | 1716         |      |
| psc.yrs.dur    | >= | 7.823408624 | psc.yrs.dur   | <  | 9.876796715 |                |              | 0.00449503   | 1716         |      |
| psc.yrs.dur    | >= | 7.823408624 | psc.yrs.dur   | >= | 9.876796715 |                |              | 0.000306191  | 1716         |      |
| psc.yrs.dur    | =  | Missing     |               |    |             |                |              | 0.000827243  | 1717         |      |
| psc.yrs.dur    | <  | 6.379192334 | AST.resultn   | =  | Missing     |                |              | 0.000617613  | 1717         |      |
| psc.yrs.dur    | <  | 6.379192334 | AST.resultn   | <  | 63.5        |                |              | 0.001200915  | 1717         |      |
| psc.yrs.dur    | <  | 6.379192334 | AST.resultn   | >= | 63.5        |                |              | 0            | 1717         |      |
| psc.yrs.dur    | >= | 6.379192334 | psc.yrs.dur   | =  | Missing     |                |              | 0.002138927  | 1717         |      |
| psc.yrs.dur    | >= | 6.379192334 | psc.yrs.dur   | <  | 8.379192334 |                |              | 0.004600283  | 1717         |      |
| psc.yrs.dur    | >= | 6.379192334 | psc.yrs.dur   | >= | 8.379192334 |                |              | 0.001154384  | 1717         |      |
| age.yrs        | =  | Missing     |               |    |             |                | Missing      | -0.000592538 | 1718         |      |
| age.yrs        | <  | 69.22108145 | psc.yrs.dur   | =  | Missing     |                | Missing      | -0.000680592 | 1718         |      |
| age.yrs        | <  | 69.22108145 | psc.yrs.dur   | <  | 1.916495551 |                | Missing      | -0.000880764 | 1718         |      |
| age.yrs        | <  | 69.22108145 | psc.yrs.dur   | >= | 1.916495551 | ALK.times.uln  | =            | Missing      | 0            | 1718 |
| age.yrs        | <  | 69.22108145 | psc.yrs.dur   | >= | 1.916495551 | ALK.times.uln  | <            | 2.781735492  | -0.000914504 | 1718 |
| age.yrs        | <  | 69.22108145 | psc.yrs.dur   | >= | 1.916495551 | ALK.times.uln  | >=           | 2.781735492  | 0.000452752  | 1718 |
| age.yrs        | >= | 69.22108145 |               |    |             |                | Missing      | 0.001555968  | 1718         |      |
| ALK.times.uln  | =  | Missing     |               |    |             |                |              | -0.000496045 | 1719         |      |

|                |    |             |               |    |             |               |         |              |              |      |
|----------------|----|-------------|---------------|----|-------------|---------------|---------|--------------|--------------|------|
| ALK.times.uln  | <  | 5.438574341 | TBILL.resultn | =  | Missing     |               |         | -0.000859728 | 1719         |      |
| ALK.times.uln  | <  | 5.438574341 | TBILL.resultn | <  | 0.95        |               |         | -0.00127424  | 1719         |      |
| ALK.times.uln  | <  | 5.438574341 | TBILL.resultn | >= | 0.95        |               |         | 0            | 1719         |      |
| ALK.times.uln  | >= | 5.438574341 | ALK.times.uln | =  | Missing     |               |         | 0.000558677  | 1719         |      |
| ALK.times.uln  | >= | 5.438574341 | ALK.times.uln | <  | 8.080406408 |               |         | 0.002117328  | 1719         |      |
| ALK.times.uln  | >= | 5.438574341 | ALK.times.uln | >= | 8.080406408 |               |         | -0.000740199 | 1719         |      |
| age.yrs        | =  | Missing     |               |    |             | Missing       |         | -5.88E-05    | 1720         |      |
| age.yrs        | <  | 69.84257358 | AST.resultn   | =  | Missing     | Missing       |         | -0.001029125 | 1720         |      |
| age.yrs        | <  | 69.84257358 | AST.resultn   | <  | 131.5       | ALK.times.uln | =       | Missing      | 0            | 1720 |
| age.yrs        | <  | 69.84257358 | AST.resultn   | <  | 131.5       | ALK.times.uln | <       | 5.545134278  | -0.000148097 | 1720 |
| age.yrs        | <  | 69.84257358 | AST.resultn   | <  | 131.5       | ALK.times.uln | >=      | 5.545134278  | 0.001301837  | 1720 |
| age.yrs        | <  | 69.84257358 | AST.resultn   | >= | 131.5       |               | Missing | -0.000637891 | 1720         |      |
| age.yrs        | >= | 69.84257358 |               |    |             |               | Missing | 0.002412987  | 1720         |      |
| ALB.resultn    | =  | Missing     |               |    |             | Missing       |         | -0.005143247 | 1721         |      |
| ALB.resultn    | <  | 2.915       |               |    |             | Missing       |         | -0.00439775  | 1721         |      |
| ALB.resultn    | >= | 2.915       | PLT.resultn   | =  | Missing     | Missing       |         | -0.006636803 | 1721         |      |
| ALB.resultn    | >= | 2.915       | PLT.resultn   | <  | 209.5       | ALK.times.uln | =       | Missing      | -0.003975204 | 1721 |
| ALB.resultn    | >= | 2.915       | PLT.resultn   | <  | 209.5       | ALK.times.uln | <       | 2.379525377  | -0.00662534  | 1721 |
| ALB.resultn    | >= | 2.915       | PLT.resultn   | <  | 209.5       | ALK.times.uln | >=      | 2.379525377  | 0            | 1721 |
| ALB.resultn    | >= | 2.915       | PLT.resultn   | >= | 209.5       |               | Missing | -0.006144413 | 1721         |      |
| ALK.times.uln  | =  | Missing     | age.yrs       | =  | Missing     |               |         | 0.000567247  | 1722         |      |
| ALK.times.uln  | =  | Missing     | age.yrs       | <  | 53.44969199 |               |         | -0.000140749 | 1722         |      |
| ALK.times.uln  | =  | Missing     | age.yrs       | >= | 53.44969199 |               |         | 0.002573236  | 1722         |      |
| ALK.times.uln  | <  | 5.438574341 | age.yrs       | =  | Missing     |               |         | 0.000488414  | 1722         |      |
| ALK.times.uln  | <  | 5.438574341 | age.yrs       | <  | 36.12046543 |               |         | 0.00120667   | 1722         |      |
| ALK.times.uln  | <  | 5.438574341 | age.yrs       | >= | 36.12046543 |               |         | 0            | 1722         |      |
| ALK.times.uln  | >= | 5.438574341 |               |    |             |               |         | 0.001871736  | 1722         |      |
| TBILL.resultn  | =  | Missing     |               |    |             | Missing       |         | -0.000159358 | 1723         |      |
| TBILL.resultn  | <  | 4.4         | psc.yrs.dur   | =  | Missing     | Missing       |         | -0.002120208 | 1723         |      |
| TBILL.resultn  | <  | 4.4         | psc.yrs.dur   | <  | 6.410677618 |               |         | -0.002263346 | 1723         |      |
| TBILL.resultn  | <  | 4.4         | psc.yrs.dur   | >= | 6.410677618 | AST.resultn   | =       | Missing      | -0.001322721 | 1723 |
| TBILL.resultn  | <  | 4.4         | psc.yrs.dur   | >= | 6.410677618 | AST.resultn   | <       | 42           | -0.002998167 | 1723 |
| TBILL.resultn  | <  | 4.4         | psc.yrs.dur   | >= | 6.410677618 | AST.resultn   | >=      | 42           | 0            | 1723 |
| TBILL.resultn  | >= | 4.4         |               |    |             |               | Missing | -0.00271209  | 1723         |      |
| age.yrs        | =  | Missing     |               |    |             | Missing       |         | -0.000938015 | 1724         |      |
| age.yrs        | <  | 69.43052704 | TBILL.resultn | =  | Missing     | Missing       |         | -0.000831312 | 1724         |      |
| age.yrs        | <  | 69.43052704 | TBILL.resultn | <  | 3.5         | TBILL.resultn | =       | Missing      | -0.001179869 | 1724 |
| age.yrs        | <  | 69.43052704 | TBILL.resultn | <  | 3.5         | TBILL.resultn | <       | 2            | -0.001281171 | 1724 |
| age.yrs        | <  | 69.43052704 | TBILL.resultn | <  | 3.5         | TBILL.resultn | >=      | 2            | 0            | 1724 |
| age.yrs        | <  | 69.43052704 | TBILL.resultn | >= | 3.5         |               | Missing | -0.001539866 | 1724         |      |
| age.yrs        | >= | 69.43052704 |               |    |             |               | Missing | 0.005015235  | 1724         |      |
| psc.yrs.dur    | =  | Missing     |               |    |             | Missing       |         | -0.003560457 | 1725         |      |
| psc.yrs.dur    | <  | 1.954825462 |               |    |             | Missing       |         | -0.003771882 | 1725         |      |
| psc.yrs.dur    | >= | 1.954825462 | AST.resultn   | =  | Missing     | Missing       |         | -0.003046179 | 1725         |      |
| psc.yrs.dur    | >= | 1.954825462 | AST.resultn   | <  | 63.5        |               | Missing | -0.004075177 | 1725         |      |
| psc.yrs.dur    | >= | 1.954825462 | AST.resultn   | >= | 63.5        | age.yrs       | =       | Missing      | -0.001923636 | 1725 |
| psc.yrs.dur    | >= | 1.954825462 | AST.resultn   | >= | 63.5        | age.yrs       | <       | 51.76180698  | -0.00276     | 1725 |
| psc.yrs.dur    | >= | 1.954825462 | AST.resultn   | >= | 63.5        | age.yrs       | >=      | 51.76180698  | 0            | 1725 |
| TBILL.resultn  | =  | Missing     |               |    |             |               |         | -0.000427127 | 1726         |      |
| TBILL.resultn  | <  | 2.35        | ALK.times.uln | =  | Missing     |               |         | 0            | 1726         |      |
| TBILL.resultn  | <  | 2.35        | ALK.times.uln | <  | 2.822501299 |               |         | -0.000481341 | 1726         |      |
| TBILL.resultn  | <  | 2.35        | ALK.times.uln | >= | 2.822501299 |               |         | 0.001307918  | 1726         |      |
| TBILL.resultn  | >= | 2.35        | psc.yrs.dur   | =  | Missing     |               |         | 0.001451664  | 1726         |      |
| TBILL.resultn  | >= | 2.35        | psc.yrs.dur   | <  | 1.364818617 |               |         | 0.000366327  | 1726         |      |
| TBILL.resultn  | >= | 2.35        | psc.yrs.dur   | >= | 1.364818617 |               |         | 0.002754068  | 1726         |      |
| Sodium.resultn | =  | Missing     |               |    |             | Missing       |         | -0.000357916 | 1727         |      |
| Sodium.resultn | <  | 136.5       |               |    |             | Missing       |         | 0.002188267  | 1727         |      |
| Sodium.resultn | >= | 136.5       | ALK.times.uln | =  | Missing     | Missing       |         | -3.33E-05    | 1727         |      |
| Sodium.resultn | >= | 136.5       | ALK.times.uln | <  | 2.905037968 |               |         | -0.000853713 | 1727         |      |
| Sodium.resultn | >= | 136.5       | ALK.times.uln | >= | 2.905037968 | PLT.resultn   | =       | Missing      | 0.000476261  | 1727 |
| Sodium.resultn | >= | 136.5       | ALK.times.uln | >= | 2.905037968 | PLT.resultn   | <       | 267.5        | 0.001462802  | 1727 |
| Sodium.resultn | >= | 136.5       | ALK.times.uln | >= | 2.905037968 | PLT.resultn   | >=      | 267.5        | 0            | 1727 |

|               |    |             |                    |    |             |               |              |              |              |      |
|---------------|----|-------------|--------------------|----|-------------|---------------|--------------|--------------|--------------|------|
| psc.yrs.dur   | =  | Missing     |                    |    | Missing     | -0.003763646  | 1728         |              |              |      |
| psc.yrs.dur   | <  | 0.476386037 |                    |    | Missing     | -0.004389284  | 1728         |              |              |      |
| psc.yrs.dur   | >= | 0.476386037 | age.yrs            | =  | Missing     | -0.003147784  | 1728         |              |              |      |
| psc.yrs.dur   | >= | 0.476386037 | age.yrs            | <  | 53.35934292 | -0.003632968  | 1728         |              |              |      |
| psc.yrs.dur   | >= | 0.476386037 | age.yrs            | >= | 53.35934292 | AST.resultn   | =            | Missing      | -0.002118247 | 1728 |
| psc.yrs.dur   | >= | 0.476386037 | age.yrs            | >= | 53.35934292 | AST.resultn   | <            | 54.5         | -0.004459468 | 1728 |
| psc.yrs.dur   | >= | 0.476386037 | age.yrs            | >= | 53.35934292 | AST.resultn   | >=           | 54.5         | 0            | 1728 |
| age.yrs       | =  | Missing     |                    |    | Missing     | -0.001893057  | 1729         |              |              |      |
| age.yrs       | <  | 70.37645448 | Sodium.resultn     | =  | Missing     | -0.002170321  | 1729         |              |              |      |
| age.yrs       | <  | 70.37645448 | Sodium.resultn     | <  | 138.5       | psc.yrs.dur   | =            | Missing      | -0.001075621 | 1729 |
| age.yrs       | <  | 70.37645448 | Sodium.resultn     | <  | 138.5       | psc.yrs.dur   | <            | 1.232032854  | -0.002249026 | 1729 |
| age.yrs       | <  | 70.37645448 | Sodium.resultn     | <  | 138.5       | psc.yrs.dur   | >=           | 1.232032854  | 0            | 1729 |
| age.yrs       | <  | 70.37645448 | Sodium.resultn     | >= | 138.5       |               | Missing      | -0.00226498  | 1729         |      |
| age.yrs       | >= | 70.37645448 |                    |    |             | Missing       | 0.000877817  | 1729         |              |      |
| TBILL.resultn | =  | Missing     |                    |    | Missing     | -0.000381757  | 1730         |              |              |      |
| TBILL.resultn | <  | 2.25        | ALB.resultn        | =  | Missing     | -0.001118051  | 1730         |              |              |      |
| TBILL.resultn | <  | 2.25        | ALB.resultn        | <  | 3.465       | -0.001123704  | 1730         |              |              |      |
| TBILL.resultn | <  | 2.25        | ALB.resultn        | >= | 3.465       | ALK.times.uln | =            | Missing      | 0            | 1730 |
| TBILL.resultn | <  | 2.25        | ALB.resultn        | >= | 3.465       | ALK.times.uln | <            | 3.635579421  | -0.000910157 | 1730 |
| TBILL.resultn | <  | 2.25        | ALB.resultn        | >= | 3.465       | ALK.times.uln | >=           | 3.635579421  | 0.000783739  | 1730 |
| TBILL.resultn | >= | 2.25        |                    |    |             | Missing       | 0.001150376  | 1730         |              |      |
| psc.yrs.dur   | =  | Missing     |                    |    |             | -0.000144132  | 1731         |              |              |      |
| psc.yrs.dur   | <  | 8.026009582 | PLT.resultn        | =  | Missing     | 0             | 1731         |              |              |      |
| psc.yrs.dur   | <  | 8.026009582 | PLT.resultn        | <  | 267.5       | 0.000193182   | 1731         |              |              |      |
| psc.yrs.dur   | <  | 8.026009582 | PLT.resultn        | >= | 267.5       | -0.000796939  | 1731         |              |              |      |
| psc.yrs.dur   | >= | 8.026009582 | AST.resultn        | =  | Missing     | 0.000747858   | 1731         |              |              |      |
| psc.yrs.dur   | >= | 8.026009582 | AST.resultn        | <  | 42          | -0.001084726  | 1731         |              |              |      |
| psc.yrs.dur   | >= | 8.026009582 | AST.resultn        | >= | 42          | 0.002885873   | 1731         |              |              |      |
| TBILL.resultn | =  | Missing     |                    |    |             | 0.000459346   | 1732         |              |              |      |
| TBILL.resultn | <  | 1.65        | age.yrs            | =  | Missing     | -0.001837976  | 1732         |              |              |      |
| TBILL.resultn | <  | 1.65        | age.yrs            | <  | 64.89253936 | -0.002066425  | 1732         |              |              |      |
| TBILL.resultn | <  | 1.65        | age.yrs            | >= | 64.89253936 | 0             | 1732         |              |              |      |
| TBILL.resultn | >= | 1.65        | ALK.times.uln      | =  | Missing     | -0.001122071  | 1732         |              |              |      |
| TBILL.resultn | >= | 1.65        | ALK.times.uln      | <  | 5.021912351 | -0.000964684  | 1732         |              |              |      |
| TBILL.resultn | >= | 1.65        | ALK.times.uln      | >= | 5.021912351 | -0.001339992  | 1732         |              |              |      |
| AST.resultn   | =  | Missing     |                    |    |             | Missing       | -0.010493946 | 1733         |              |      |
| AST.resultn   | <  | 52.5        |                    |    |             | Missing       | -0.010496191 | 1733         |              |      |
| AST.resultn   | >= | 52.5        | AST.resultn        | =  | Missing     | -0.008432309  | 1733         |              |              |      |
| AST.resultn   | >= | 52.5        | AST.resultn        | <  | 65.5        | TBILL.resultn | =            | Missing      | -0.004105009 | 1733 |
| AST.resultn   | >= | 52.5        | AST.resultn        | <  | 65.5        | TBILL.resultn | <            | 0.65         | -0.00944152  | 1733 |
| AST.resultn   | >= | 52.5        | AST.resultn        | <  | 65.5        | TBILL.resultn | >=           | 0.65         | 0            | 1733 |
| AST.resultn   | >= | 52.5        | AST.resultn        | >= | 65.5        |               | Missing      | -0.009491116 | 1733         |      |
| TBILL.resultn | =  | Missing     |                    |    |             | -0.000358017  | 1734         |              |              |      |
| TBILL.resultn | <  | 1.65        | ALK.times.uln      | =  | Missing     | 0             | 1734         |              |              |      |
| TBILL.resultn | <  | 1.65        | ALK.times.uln      | <  | 2.822501299 | -0.000381455  | 1734         |              |              |      |
| TBILL.resultn | <  | 1.65        | ALK.times.uln      | >= | 2.822501299 | 0.001390538   | 1734         |              |              |      |
| TBILL.resultn | >= | 1.65        | PLT.resultn        | =  | Missing     | 0.000849194   | 1734         |              |              |      |
| TBILL.resultn | >= | 1.65        | PLT.resultn        | <  | 217         | 0.00167319    | 1734         |              |              |      |
| TBILL.resultn | >= | 1.65        | PLT.resultn        | >= | 217         | 0.000142913   | 1734         |              |              |      |
| ALB.resultn   | =  | Missing     |                    |    |             | Missing       | -0.001447353 | 1735         |              |      |
| ALB.resultn   | <  | 2.915       |                    |    |             | Missing       | -0.001012389 | 1735         |              |      |
| ALB.resultn   | >= | 2.915       | Hemoglobin.resultn | =  | Missing     | TBILL.resultn | =            | Missing      | -0.001863501 | 1735 |
| ALB.resultn   | >= | 2.915       | Hemoglobin.resultn | =  | Missing     | TBILL.resultn | <            | 0.95         | -0.002875116 | 1735 |
| ALB.resultn   | >= | 2.915       | Hemoglobin.resultn | =  | Missing     | TBILL.resultn | >=           | 0.95         | 0            | 1735 |
| ALB.resultn   | >= | 2.915       | Hemoglobin.resultn | <  | 11.45       |               | Missing      | -0.002357081 | 1735         |      |
| ALB.resultn   | >= | 2.915       | Hemoglobin.resultn | >= | 11.45       |               | Missing      | -0.002221    | 1735         |      |
| ALB.resultn   | =  | Missing     |                    |    |             | Missing       | -0.000316202 | 1736         |              |      |
| ALB.resultn   | <  | 2.95        |                    |    |             | Missing       | 0.00155951   | 1736         |              |      |
| ALB.resultn   | >= | 2.95        | PLT.resultn        | =  | Missing     | Missing       | 0.000490304  | 1736         |              |      |
| ALB.resultn   | >= | 2.95        | PLT.resultn        | <  | 185.5       | Missing       | 0.002127603  | 1736         |              |      |
| ALB.resultn   | >= | 2.95        | PLT.resultn        | >= | 185.5       | ALB.resultn   | =            | Missing      | -3.08E-05    | 1736 |
| ALB.resultn   | >= | 2.95        | PLT.resultn        | >= | 185.5       | ALB.resultn   | <            | 3.165        | -0.000526825 | 1736 |

|                |    |             |                    |    |             |               |    |             |              |      |
|----------------|----|-------------|--------------------|----|-------------|---------------|----|-------------|--------------|------|
| ALB.resultn    | >= | 2.95        | PLT.resultn        | >= | 185.5       | ALB.resultn   | >= | 3.165       | 0            | 1736 |
| PLT.resultn    | =  | Missing     |                    |    |             |               |    | Missing     | 0.000449579  | 1737 |
| PLT.resultn    | <  | 170         |                    |    |             |               |    | Missing     | 0.002450159  | 1737 |
| PLT.resultn    | >= | 170         | Hemoglobin.resultn | =  | Missing     | ALB.resultn   | =  | Missing     | 0.000804885  | 1737 |
| PLT.resultn    | >= | 170         | Hemoglobin.resultn | =  | Missing     | ALB.resultn   | <  | 3.95        | 0.002253679  | 1737 |
| PLT.resultn    | >= | 170         | Hemoglobin.resultn | =  | Missing     | ALB.resultn   | >= | 3.95        | 0            | 1737 |
| PLT.resultn    | >= | 170         | Hemoglobin.resultn | <  | 12.35       |               |    | Missing     | 0.000431305  | 1737 |
| PLT.resultn    | >= | 170         | Hemoglobin.resultn | >= | 12.35       |               |    | Missing     | 0.001015165  | 1737 |
| ALK.times.uln  | =  | Missing     | AST.resultn        | =  | Missing     |               |    |             | 0.00086392   | 1738 |
| ALK.times.uln  | =  | Missing     | AST.resultn        | <  | 143         |               |    |             | 0.001043904  | 1738 |
| ALK.times.uln  | =  | Missing     | AST.resultn        | >= | 143         |               |    |             | 0            | 1738 |
| ALK.times.uln  | <  | 5.336800235 |                    |    |             |               |    |             | 0.000184002  | 1738 |
| ALK.times.uln  | >= | 5.336800235 | ALK.times.uln      | =  | Missing     |               |    |             | 0.001621524  | 1738 |
| ALK.times.uln  | >= | 5.336800235 | ALK.times.uln      | <  | 7.728571429 |               |    |             | 0.002456445  | 1738 |
| ALK.times.uln  | >= | 5.336800235 | ALK.times.uln      | >= | 7.728571429 |               |    |             | 0.000452633  | 1738 |
| Sodium.resultn | =  | Missing     |                    |    |             |               |    |             | 0.000465071  | 1739 |
| Sodium.resultn | <  | 138.5       | ALK.times.uln      | =  | Missing     |               |    |             | 0.000645221  | 1739 |
| Sodium.resultn | <  | 138.5       | ALK.times.uln      | <  | 2.795652174 |               |    |             | 0.000761753  | 1739 |
| Sodium.resultn | <  | 138.5       | ALK.times.uln      | >= | 2.795652174 |               |    |             | 0.002066759  | 1739 |
| Sodium.resultn | >= | 138.5       | AST.resultn        | =  | Missing     |               |    |             | 0.000533132  | 1739 |
| Sodium.resultn | >= | 138.5       | AST.resultn        | <  | 140.5       |               |    |             | 0.000616995  | 1739 |
| Sodium.resultn | >= | 138.5       | AST.resultn        | >= | 140.5       |               |    |             | 0            | 1739 |
| ALK.times.uln  | =  | Missing     | ALB.resultn        | =  | Missing     |               |    |             | 0            | 1740 |
| ALK.times.uln  | =  | Missing     | ALB.resultn        | <  | 3.95        |               |    |             | 0.002399292  | 1740 |
| ALK.times.uln  | =  | Missing     | ALB.resultn        | >= | 3.95        |               |    |             | 2.20E-05     | 1740 |
| ALK.times.uln  | <  | 5.462893197 |                    |    |             |               |    |             | 0.000652712  | 1740 |
| ALK.times.uln  | >= | 5.462893197 | TBILL.resultn      | =  | Missing     |               |    |             | 0.001556694  | 1740 |
| ALK.times.uln  | >= | 5.462893197 | TBILL.resultn      | <  | 1.7         |               |    |             | 0.001901944  | 1740 |
| ALK.times.uln  | >= | 5.462893197 | TBILL.resultn      | >= | 1.7         |               |    |             | 0.001117285  | 1740 |
| PLT.resultn    | =  | Missing     |                    |    |             |               |    | Missing     | -0.002410263 | 1741 |
| PLT.resultn    | <  | 248.5       | ALB.resultn        | =  | Missing     |               |    | Missing     | -0.001867134 | 1741 |
| PLT.resultn    | <  | 248.5       | ALB.resultn        | <  | 3.75        |               |    | Missing     | 0.000277603  | 1741 |
| PLT.resultn    | <  | 248.5       | ALB.resultn        | >= | 3.75        | PLT.resultn   | =  | Missing     | -0.002475343 | 1741 |
| PLT.resultn    | <  | 248.5       | ALB.resultn        | >= | 3.75        | PLT.resultn   | <  | 241         | -0.00307126  | 1741 |
| PLT.resultn    | <  | 248.5       | ALB.resultn        | >= | 3.75        | PLT.resultn   | >= | 241         | 0            | 1741 |
| PLT.resultn    | >= | 248.5       |                    |    |             |               |    | Missing     | -0.003000491 | 1741 |
| TBILL.resultn  | =  | Missing     |                    |    |             |               |    | Missing     | -0.001577251 | 1742 |
| TBILL.resultn  | <  | 1.55        |                    |    |             |               |    | Missing     | -0.003307902 | 1742 |
| TBILL.resultn  | >= | 1.55        | PLT.resultn        | =  | Missing     |               |    | Missing     | -0.001506316 | 1742 |
| TBILL.resultn  | >= | 1.55        | PLT.resultn        | <  | 219         |               |    | Missing     | -0.001195517 | 1742 |
| TBILL.resultn  | >= | 1.55        | PLT.resultn        | >= | 219         | ALB.resultn   | =  | Missing     | -0.001669116 | 1742 |
| TBILL.resultn  | >= | 1.55        | PLT.resultn        | >= | 219         | ALB.resultn   | <  | 3.95        | -0.003338233 | 1742 |
| TBILL.resultn  | >= | 1.55        | PLT.resultn        | >= | 219         | ALB.resultn   | >= | 3.95        | 0            | 1742 |
| TBILL.resultn  | =  | Missing     |                    |    |             |               |    |             | -0.001803413 | 1743 |
| TBILL.resultn  | <  | 2.35        | ALB.resultn        | =  | Missing     |               |    |             | 0            | 1743 |
| TBILL.resultn  | <  | 2.35        | ALB.resultn        | <  | 3.465       |               |    |             | -0.001488579 | 1743 |
| TBILL.resultn  | <  | 2.35        | ALB.resultn        | >= | 3.465       |               |    |             | -0.000762023 | 1743 |
| TBILL.resultn  | >= | 2.35        | PLT.resultn        | =  | Missing     |               |    |             | -4.10E-05    | 1743 |
| TBILL.resultn  | >= | 2.35        | PLT.resultn        | <  | 249.5       |               |    |             | 0.001180883  | 1743 |
| TBILL.resultn  | >= | 2.35        | PLT.resultn        | >= | 249.5       |               |    |             | -0.001262908 | 1743 |
| psc.yrs.dur    | =  | Missing     |                    |    |             |               |    | Missing     | -0.00292514  | 1744 |
| psc.yrs.dur    | <  | 1.397672827 |                    |    |             |               |    | Missing     | -0.003173414 | 1744 |
| psc.yrs.dur    | >= | 1.397672827 | AST.resultn        | =  | Missing     |               |    | Missing     | -0.002464857 | 1744 |
| psc.yrs.dur    | >= | 1.397672827 | AST.resultn        | <  | 47          |               |    | Missing     | -0.003686085 | 1744 |
| psc.yrs.dur    | >= | 1.397672827 | AST.resultn        | >= | 47          | age.yrs       | =  | Missing     | -0.001592551 | 1744 |
| psc.yrs.dur    | >= | 1.397672827 | AST.resultn        | >= | 47          | age.yrs       | <  | 56.57084189 | -0.002167638 | 1744 |
| psc.yrs.dur    | >= | 1.397672827 | AST.resultn        | >= | 47          | age.yrs       | >= | 56.57084189 | 0            | 1744 |
| PLT.resultn    | =  | Missing     |                    |    |             |               |    | Missing     | -0.000744345 | 1745 |
| PLT.resultn    | <  | 170.5       |                    |    |             |               |    | Missing     | 0.001389794  | 1745 |
| PLT.resultn    | >= | 170.5       | age.yrs            | =  | Missing     |               |    | Missing     | -0.000840758 | 1745 |
| PLT.resultn    | >= | 170.5       | age.yrs            | <  | 53.64681725 |               |    | Missing     | -0.000954164 | 1745 |
| PLT.resultn    | >= | 170.5       | age.yrs            | >= | 53.64681725 | ALK.times.uln | =  | Missing     | 0            | 1745 |

|                |    |                            |    |                           |    |            |              |      |
|----------------|----|----------------------------|----|---------------------------|----|------------|--------------|------|
| PLT.resultn    | >= | 170.5 age.yrs              | >= | 53.64681725 ALK.times.uln | <  | 3.33040955 | -0.001498181 | 1745 |
| PLT.resultn    | >= | 170.5 age.yrs              | >= | 53.64681725 ALK.times.uln | >= | 3.33040955 | 0.000893804  | 1745 |
| age.yrs        | =  | Missing                    |    |                           |    | Missing    | 0.000171927  | 1746 |
| age.yrs        | <  | 69.50444901 Sodium.resultn | =  | Missing                   |    | Missing    | -0.000380394 | 1746 |
| age.yrs        | <  | 69.50444901 Sodium.resultn | <  | 140.5 PLT.resultn         | =  | Missing    | 0.000738919  | 1746 |
| age.yrs        | <  | 69.50444901 Sodium.resultn | <  | 140.5 PLT.resultn         | <  | 250        | 0.002073741  | 1746 |
| age.yrs        | <  | 69.50444901 Sodium.resultn | <  | 140.5 PLT.resultn         | >= | 250        | 0            | 1746 |
| age.yrs        | <  | 69.50444901 Sodium.resultn | >= | 140.5                     |    | Missing    | -0.00021522  | 1746 |
| age.yrs        | >= | 69.50444901                |    |                           |    | Missing    | 0.002567185  | 1746 |
| psc.yrs.dur    | =  | Missing                    |    |                           |    | Missing    | -0.004095379 | 1747 |
| psc.yrs.dur    | <  | 0.836413415                |    |                           |    | Missing    | -0.004468041 | 1747 |
| psc.yrs.dur    | >= | 0.836413415 age.yrs        | =  | Missing                   |    | Missing    | -0.003607531 | 1747 |
| psc.yrs.dur    | >= | 0.836413415 age.yrs        | <  | 53.4715948                |    | Missing    | -0.004015998 | 1747 |
| psc.yrs.dur    | >= | 0.836413415 age.yrs        | >= | 53.4715948 AST.resultn    | =  | Missing    | -0.002694487 | 1747 |
| psc.yrs.dur    | >= | 0.836413415 age.yrs        | >= | 53.4715948 AST.resultn    | <  | 53.5       | -0.004821714 | 1747 |
| psc.yrs.dur    | >= | 0.836413415 age.yrs        | >= | 53.4715948 AST.resultn    | >= | 53.5       | 0            | 1747 |
| ALB.resultn    | =  | Missing                    |    |                           |    | Missing    | 0.001209072  | 1748 |
| ALB.resultn    | <  | 2.95                       |    |                           |    | Missing    | 0.00249493   | 1748 |
| ALB.resultn    | >= | 2.95 ALB.resultn           | =  | Missing                   |    | Missing    | 0.000812171  | 1748 |
| ALB.resultn    | >= | 2.95 ALB.resultn           | <  | 3.13                      |    | Missing    | 0.000535896  | 1748 |
| ALB.resultn    | >= | 2.95 ALB.resultn           | >= | 3.13 PLT.resultn          | =  | Missing    | 0            | 1748 |
| ALB.resultn    | >= | 2.95 ALB.resultn           | >= | 3.13 PLT.resultn          | <  | 267.5      | 0.001683004  | 1748 |
| ALB.resultn    | >= | 2.95 ALB.resultn           | >= | 3.13 PLT.resultn          | >= | 267.5      | 2.10E-06     | 1748 |
| TBILI.resultn  | =  | Missing                    |    |                           |    | Missing    | 0.000696871  | 1749 |
| TBILI.resultn  | <  | 3.75 PLT.resultn           | =  | Missing                   |    | Missing    | -4.31E-05    | 1749 |
| TBILI.resultn  | <  | 3.75 PLT.resultn           | <  | 206.5 Hemoglobin.resultn  | =  | Missing    | 0.000740357  | 1749 |
| TBILI.resultn  | <  | 3.75 PLT.resultn           | <  | 206.5 Hemoglobin.resultn  | <  | 14.15      | 0.001850893  | 1749 |
| TBILI.resultn  | <  | 3.75 PLT.resultn           | <  | 206.5 Hemoglobin.resultn  | >= | 14.15      | 0            | 1749 |
| TBILI.resultn  | <  | 3.75 PLT.resultn           | >= | 206.5                     |    | Missing    | 0.000672436  | 1749 |
| TBILI.resultn  | >= | 3.75                       |    |                           |    | Missing    | 0.001791414  | 1749 |
| AST.resultn    | =  | Missing                    |    |                           |    | Missing    | -0.003467369 | 1750 |
| AST.resultn    | <  | 47.5                       |    |                           |    | Missing    | -0.003486532 | 1750 |
| AST.resultn    | >= | 47.5 age.yrs               | =  | Missing                   |    | Missing    | -0.002219737 | 1750 |
| AST.resultn    | >= | 47.5 age.yrs               | <  | 51.63175907               |    | Missing    | -0.002717342 | 1750 |
| AST.resultn    | >= | 47.5 age.yrs               | >= | 51.63175907 PLT.resultn   | =  | Missing    | -0.001112563 | 1750 |
| AST.resultn    | >= | 47.5 age.yrs               | >= | 51.63175907 PLT.resultn   | <  | 236.5      | -0.002058242 | 1750 |
| AST.resultn    | >= | 47.5 age.yrs               | >= | 51.63175907 PLT.resultn   | >= | 236.5      | 0            | 1750 |
| ALB.resultn    | =  | Missing                    |    |                           |    | Missing    | -0.000364709 | 1751 |
| ALB.resultn    | <  | 2.965                      |    |                           |    | Missing    | 0.001772527  | 1751 |
| ALB.resultn    | >= | 2.965 psc.yrs.dur          | =  | Missing                   |    | Missing    | 0.000615113  | 1751 |
| ALB.resultn    | >= | 2.965 psc.yrs.dur          | <  | 12.63107461 TBILI.resultn | =  | Missing    | 0.000501949  | 1751 |
| ALB.resultn    | >= | 2.965 psc.yrs.dur          | <  | 12.63107461 TBILI.resultn | <  | 2.85       | 0.000532998  | 1751 |
| ALB.resultn    | >= | 2.965 psc.yrs.dur          | <  | 12.63107461 TBILI.resultn | >= | 2.85       | 0            | 1751 |
| ALB.resultn    | >= | 2.965 psc.yrs.dur          | >= | 12.63107461               |    | Missing    | 0.002980244  | 1751 |
| Sodium.resultn | =  | Missing                    |    |                           |    |            | -7.25E-05    | 1752 |
| Sodium.resultn | <  | 140.5 TBILI.resultn        | =  | Missing                   |    |            | 0.00084574   | 1752 |
| Sodium.resultn | <  | 140.5 TBILI.resultn        | <  | 3.3                       |    |            | 0.000654362  | 1752 |
| Sodium.resultn | <  | 140.5 TBILI.resultn        | >= | 3.3                       |    |            | 0.002338488  | 1752 |
| Sodium.resultn | >= | 140.5 ALB.resultn          | =  | Missing                   |    |            | -1.77E-05    | 1752 |
| Sodium.resultn | >= | 140.5 ALB.resultn          | <  | 3.35                      |    |            | -0.000109616 | 1752 |
| Sodium.resultn | >= | 140.5 ALB.resultn          | >= | 3.35                      |    |            | 0            | 1752 |
| ALK.times.uln  | =  | Missing psc.yrs.dur        | =  | Missing                   |    | Missing    | 0.000933373  | 1753 |
| ALK.times.uln  | =  | Missing psc.yrs.dur        | <  | 0.106776181               |    | Missing    | 0.000315285  | 1753 |
| ALK.times.uln  | =  | Missing psc.yrs.dur        | >= | 0.106776181 TBILI.resultn | =  | Missing    | 0            | 1753 |
| ALK.times.uln  | =  | Missing psc.yrs.dur        | >= | 0.106776181 TBILI.resultn | <  | 0.75       | -5.44E-06    | 1753 |
| ALK.times.uln  | =  | Missing psc.yrs.dur        | >= | 0.106776181 TBILI.resultn | >= | 0.75       | 0.002917688  | 1753 |
| ALK.times.uln  | <  | 5.462893197                |    |                           |    | Missing    | 0.000687963  | 1753 |
| ALK.times.uln  | >= | 5.462893197                |    |                           |    | Missing    | 0.001784129  | 1753 |
| ALK.times.uln  | =  | Missing AST.resultn        | =  | Missing                   |    |            | -0.001112533 | 1754 |
| ALK.times.uln  | =  | Missing AST.resultn        | <  | 65                        |    |            | -0.00189785  | 1754 |
| ALK.times.uln  | =  | Missing AST.resultn        | >= | 65                        |    |            | 0            | 1754 |
| ALK.times.uln  | <  | 7.740239044 ALK.times.uln  | =  | Missing                   |    |            | -0.001062209 | 1754 |

|                |    |             |                    |    |             |               |    |              |              |      |
|----------------|----|-------------|--------------------|----|-------------|---------------|----|--------------|--------------|------|
| ALK.times.uln  | <  | 7.740239044 | ALK.times.uln      | <  | 5.859702093 |               |    | -0.001170795 | 1754         |      |
| ALK.times.uln  | <  | 7.740239044 | ALK.times.uln      | >= | 5.859702093 |               |    | 0.000794602  | 1754         |      |
| ALK.times.uln  | >= | 7.740239044 |                    |    |             |               |    | -0.001454593 | 1754         |      |
| age.yrs        | =  | Missing     |                    |    |             | Missing       |    | -0.000390638 | 1755         |      |
| age.yrs        | <  | 51.63175907 |                    |    |             | Missing       |    | -0.0005751   | 1755         |      |
| age.yrs        | >= | 51.63175907 | AST.resultn        | =  | Missing     | Missing       |    | 4.14E-05     | 1755         |      |
| age.yrs        | >= | 51.63175907 | AST.resultn        | <  | 51.5        | Missing       |    | -0.001107349 | 1755         |      |
| age.yrs        | >= | 51.63175907 | AST.resultn        | >= | 51.5        | PLT.resultn   | =  | Missing      | 0.001159083  | 1755 |
| age.yrs        | >= | 51.63175907 | AST.resultn        | >= | 51.5        | PLT.resultn   | <  | 251.5        | 0.00187661   | 1755 |
| age.yrs        | >= | 51.63175907 | AST.resultn        | >= | 51.5        | PLT.resultn   | >= | 251.5        | 0            | 1755 |
| ALB.resultn    | =  | Missing     |                    |    |             | Missing       |    | 0.000174995  | 1756         |      |
| ALB.resultn    | <  | 2.95        |                    |    |             | Missing       |    | 0.001500884  | 1756         |      |
| ALB.resultn    | >= | 2.95        | PLT.resultn        | =  | Missing     | Missing       |    | 0.000661938  | 1756         |      |
| ALB.resultn    | >= | 2.95        | PLT.resultn        | <  | 185.5       | Missing       |    | 0.001509834  | 1756         |      |
| ALB.resultn    | >= | 2.95        | PLT.resultn        | >= | 185.5       | ALB.resultn   | =  | Missing      | -1.29E-05    | 1756 |
| ALB.resultn    | >= | 2.95        | PLT.resultn        | >= | 185.5       | ALB.resultn   | <  | 3.135        | -0.000225192 | 1756 |
| ALB.resultn    | >= | 2.95        | PLT.resultn        | >= | 185.5       | ALB.resultn   | >= | 3.135        | 0            | 1756 |
| Sodium.resultn | =  | Missing     |                    |    |             | Missing       |    | -0.001791722 | 1757         |      |
| Sodium.resultn | <  | 138.5       | psc.yrs.dur        | =  | Missing     | Missing       |    | -0.000156269 | 1757         |      |
| Sodium.resultn | <  | 138.5       | psc.yrs.dur        | <  | 7.227926078 | age.yrs       | =  | Missing      | -0.001267118 | 1757 |
| Sodium.resultn | <  | 138.5       | psc.yrs.dur        | <  | 7.227926078 | age.yrs       | <  | 56.41615332  | -0.001663092 | 1757 |
| Sodium.resultn | <  | 138.5       | psc.yrs.dur        | <  | 7.227926078 | age.yrs       | >= | 56.41615332  | 0            | 1757 |
| Sodium.resultn | <  | 138.5       | psc.yrs.dur        | >= | 7.227926078 |               |    | Missing      | 0.004509297  | 1757 |
| Sodium.resultn | >= | 138.5       |                    |    |             | Missing       |    | Missing      | -0.001629968 | 1757 |
| ALK.times.uln  | =  | Missing     | psc.yrs.dur        | =  | Missing     | Missing       |    | 0.000532639  | 1758         |      |
| ALK.times.uln  | =  | Missing     | psc.yrs.dur        | <  | 0.472279261 |               |    | Missing      | 0.000196491  | 1758 |
| ALK.times.uln  | =  | Missing     | psc.yrs.dur        | >= | 0.472279261 | ALB.resultn   | =  | Missing      | 0.000850112  | 1758 |
| ALK.times.uln  | =  | Missing     | psc.yrs.dur        | >= | 0.472279261 | ALB.resultn   | <  | 3.95         | 0.002295303  | 1758 |
| ALK.times.uln  | =  | Missing     | psc.yrs.dur        | >= | 0.472279261 | ALB.resultn   | >= | 3.95         | 0            | 1758 |
| ALK.times.uln  | <  | 5.446215139 |                    |    |             | Missing       |    | 0.000646781  | 1758         |      |
| ALK.times.uln  | >= | 5.446215139 |                    |    |             | Missing       |    | 0.001794951  | 1758         |      |
| Sodium.resultn | =  | Missing     |                    |    |             | Missing       |    | -0.002302756 | 1759         |      |
| Sodium.resultn | <  | 138.5       | AST.resultn        | =  | Missing     | Missing       |    | -0.001397205 | 1759         |      |
| Sodium.resultn | <  | 138.5       | AST.resultn        | <  | 47          |               |    | Missing      | -0.003004766 | 1759 |
| Sodium.resultn | <  | 138.5       | AST.resultn        | >= | 47          | TBILI.resultn | =  | Missing      | -0.000486255 | 1759 |
| Sodium.resultn | <  | 138.5       | AST.resultn        | >= | 47          | TBILI.resultn | <  | 0.9          | -0.001410139 | 1759 |
| Sodium.resultn | <  | 138.5       | AST.resultn        | >= | 47          | TBILI.resultn | >= | 0.9          | 0            | 1759 |
| Sodium.resultn | >= | 138.5       |                    |    |             | Missing       |    | -0.002239683 | 1759         |      |
| Sodium.resultn | =  | Missing     |                    |    |             | Missing       |    | -0.00377179  | 1760         |      |
| Sodium.resultn | <  | 136.5       |                    |    |             | Missing       |    | -0.001306174 | 1760         |      |
| Sodium.resultn | >= | 136.5       | PLT.resultn        | =  | Missing     | Missing       |    | -0.004051209 | 1760         |      |
| Sodium.resultn | >= | 136.5       | PLT.resultn        | <  | 249.5       | age.yrs       | =  | Missing      | -0.002114601 | 1760 |
| Sodium.resultn | >= | 136.5       | PLT.resultn        | <  | 249.5       | age.yrs       | <  | 53.44969199  | -0.003257629 | 1760 |
| Sodium.resultn | >= | 136.5       | PLT.resultn        | <  | 249.5       | age.yrs       | >= | 53.44969199  | 0            | 1760 |
| Sodium.resultn | >= | 136.5       | PLT.resultn        | >= | 249.5       |               |    | Missing      | -0.004032871 | 1760 |
| Sodium.resultn | =  | Missing     |                    |    |             | Missing       |    | Missing      | -0.001507706 | 1761 |
| Sodium.resultn | <  | 136.5       |                    |    |             | Missing       |    | 0.001050195  | 1761         |      |
| Sodium.resultn | >= | 136.5       | psc.yrs.dur        | =  | Missing     | Missing       |    | -0.001096726 | 1761         |      |
| Sodium.resultn | >= | 136.5       | psc.yrs.dur        | <  | 0.476386037 |               |    | Missing      | -0.001793458 | 1761 |
| Sodium.resultn | >= | 136.5       | psc.yrs.dur        | >= | 0.476386037 | TBILI.resultn | =  | Missing      | -0.000418329 | 1761 |
| Sodium.resultn | >= | 136.5       | psc.yrs.dur        | >= | 0.476386037 | TBILI.resultn | <  | 1.95         | -0.00049801  | 1761 |
| Sodium.resultn | >= | 136.5       | psc.yrs.dur        | >= | 0.476386037 | TBILI.resultn | >= | 1.95         | 0            | 1761 |
| ALK.times.uln  | =  | Missing     | psc.yrs.dur        | =  | Missing     |               |    | -0.000606106 | 1762         |      |
| ALK.times.uln  | =  | Missing     | psc.yrs.dur        | <  | 0.472279261 |               |    | -0.001481593 | 1762         |      |
| ALK.times.uln  | =  | Missing     | psc.yrs.dur        | >= | 0.472279261 |               |    | 0            | 1762         |      |
| ALK.times.uln  | <  | 2.81254114  |                    |    |             |               |    | -0.001563775 | 1762         |      |
| ALK.times.uln  | >= | 2.81254114  | Sodium.resultn     | =  | Missing     |               |    | -0.001024098 | 1762         |      |
| ALK.times.uln  | >= | 2.81254114  | Sodium.resultn     | <  | 138.5       |               |    | 0.001617368  | 1762         |      |
| ALK.times.uln  | >= | 2.81254114  | Sodium.resultn     | >= | 138.5       |               |    | -7.40E-05    | 1762         |      |
| AST.resultn    | =  | Missing     |                    |    |             | Missing       |    | 0.000399943  | 1763         |      |
| AST.resultn    | <  | 208         | Hemoglobin.resultn | =  | Missing     | Missing       |    | 0.000264808  | 1763         |      |
| AST.resultn    | <  | 208         | Hemoglobin.resultn | <  | 11.05       | Missing       |    | 0.001557413  | 1763         |      |



|               |    |                           |             |                      |             |         |              |      |
|---------------|----|---------------------------|-------------|----------------------|-------------|---------|--------------|------|
| AST.resultn   | <  | 208 Hemoglobin.resultn    | >=          | 11.05 TBILI.resultn  | =           | Missing | 0.000205189  | 1763 |
| AST.resultn   | <  | 208 Hemoglobin.resultn    | >=          | 11.05 TBILI.resultn  | <           | 2.6     | 0.0002186    | 1763 |
| AST.resultn   | <  | 208 Hemoglobin.resultn    | >=          | 11.05 TBILI.resultn  | >=          | 2.6     | 0            | 1763 |
| AST.resultn   | >= | 208                       |             |                      |             | Missing | 0.002280274  | 1763 |
| age.yrs       | =  | Missing                   |             |                      |             | Missing | -0.000305471 | 1764 |
| age.yrs       | <  | 71.28678987 PLT.resultn   | =           | Missing              |             | Missing | -0.001118512 | 1764 |
| age.yrs       | <  | 71.28678987 PLT.resultn   | <           | 209.5 ALB.resultn    | =           | Missing | 0.000356839  | 1764 |
| age.yrs       | <  | 71.28678987 PLT.resultn   | <           | 209.5 ALB.resultn    | <           | 3.75    | 0.001498725  | 1764 |
| age.yrs       | <  | 71.28678987 PLT.resultn   | <           | 209.5 ALB.resultn    | >=          | 3.75    | 0            | 1764 |
| age.yrs       | <  | 71.28678987 PLT.resultn   | >=          | 209.5                |             | Missing | -0.000511832 | 1764 |
| age.yrs       | >= | 71.28678987               |             |                      |             | Missing | 0.002727637  | 1764 |
| AST.resultn   | =  | Missing                   |             |                      |             | Missing | -0.002422867 | 1765 |
| AST.resultn   | <  | 143.5 ALB.resultn         | =           | Missing              |             | Missing | -0.002664517 | 1765 |
| AST.resultn   | <  | 143.5 ALB.resultn         | <           | 3.735 TBILI.resultn  | =           | Missing | -0.00153781  | 1765 |
| AST.resultn   | <  | 143.5 ALB.resultn         | <           | 3.735 TBILI.resultn  | <           | 1.31    | -0.002473869 | 1765 |
| AST.resultn   | <  | 143.5 ALB.resultn         | <           | 3.735 TBILI.resultn  | >=          | 1.31    | 0            | 1765 |
| AST.resultn   | <  | 143.5 ALB.resultn         | >=          | 3.735                |             | Missing | -0.002495298 | 1765 |
| AST.resultn   | >= | 143.5                     |             |                      |             | Missing | -0.003113806 | 1765 |
| ALK.times.uln | =  | Missing                   | age.yrs     | =                    | Missing     |         | 0.00040453   | 1766 |
| ALK.times.uln | =  | Missing                   | age.yrs     | <                    | 56.47091034 |         | 0.00048385   | 1766 |
| ALK.times.uln | =  | Missing                   | age.yrs     | >=                   | 56.47091034 |         | 0            | 1766 |
| ALK.times.uln | <  | 5.446215139 ALB.resultn   | =           | Missing              |             |         | 0.000839912  | 1766 |
| ALK.times.uln | <  | 5.446215139 ALB.resultn   | <           | 3.31                 |             |         | 0.002214891  | 1766 |
| ALK.times.uln | <  | 5.446215139 ALB.resultn   | >=          | 3.31                 |             |         | 0.000183982  | 1766 |
| ALK.times.uln | >= | 5.446215139               |             |                      |             |         | 0.001532219  | 1766 |
| psc.yrs.dur   | =  | Missing                   |             |                      |             |         | 0.000938163  | 1767 |
| psc.yrs.dur   | <  | 2.047912389 TBILI.resultn | =           | Missing              |             |         | 0            | 1767 |
| psc.yrs.dur   | <  | 2.047912389 TBILI.resultn | <           | 2.6                  |             |         | 0.000872988  | 1767 |
| psc.yrs.dur   | <  | 2.047912389 TBILI.resultn | >=          | 2.6                  |             |         | 0.000273298  | 1767 |
| psc.yrs.dur   | >= | 2.047912389 ALK.times.uln | =           | Missing              |             |         | 0.001182977  | 1767 |
| psc.yrs.dur   | >= | 2.047912389 ALK.times.uln | <           | 2.773309179          |             |         | 0.000808099  | 1767 |
| psc.yrs.dur   | >= | 2.047912389 ALK.times.uln | >=          | 2.773309179          |             |         | 0.002317462  | 1767 |
| ALK.times.uln | =  | Missing                   | psc.yrs.dur | =                    | Missing     |         | -0.000447779 | 1768 |
| ALK.times.uln | =  | Missing                   | psc.yrs.dur | <                    | 0.399726215 |         | -0.0011398   | 1768 |
| ALK.times.uln | =  | Missing                   | psc.yrs.dur | >=                   | 0.399726215 |         | 0            | 1768 |
| ALK.times.uln | <  | 7.861978174 TBILI.resultn | =           | Missing              |             |         | -0.000309564 | 1768 |
| ALK.times.uln | <  | 7.861978174 TBILI.resultn | <           | 2.45                 |             |         | -0.000402632 | 1768 |
| ALK.times.uln | <  | 7.861978174 TBILI.resultn | >=          | 2.45                 |             |         | 0.000900319  | 1768 |
| ALK.times.uln | >= | 7.861978174               |             |                      |             |         | -0.001062052 | 1768 |
| AST.resultn   | =  | Missing                   |             |                      |             | Missing | -0.000700285 | 1769 |
| AST.resultn   | <  | 216 Sodium.resultn        | =           | Missing              |             | Missing | -0.000333365 | 1769 |
| AST.resultn   | <  | 216 Sodium.resultn        | <           | 137.5 AST.resultn    | =           | Missing | 0.001427628  | 1769 |
| AST.resultn   | <  | 216 Sodium.resultn        | <           | 137.5 AST.resultn    | <           | 67      | 0.003633961  | 1769 |
| AST.resultn   | <  | 216 Sodium.resultn        | <           | 137.5 AST.resultn    | >=          | 67      | 0            | 1769 |
| AST.resultn   | <  | 216 Sodium.resultn        | >=          | 137.5                |             | Missing | 0.000145755  | 1769 |
| AST.resultn   | >= | 216                       |             |                      |             | Missing | 0.00213603   | 1769 |
| ALB.resultn   | =  | Missing                   |             |                      |             | Missing | -0.000528701 | 1770 |
| ALB.resultn   | <  | 2.95                      |             |                      |             | Missing | 0.001553834  | 1770 |
| ALB.resultn   | >= | 2.95 ALB.resultn          | =           | Missing              |             | Missing | 0.000471421  | 1770 |
| ALB.resultn   | >= | 2.95 ALB.resultn          | <           | 3.185                |             | Missing | -0.000258505 | 1770 |
| ALB.resultn   | >= | 2.95 ALB.resultn          | >=          | 3.185 Sodium.resultn | =           | Missing | 0            | 1770 |
| ALB.resultn   | >= | 2.95 ALB.resultn          | >=          | 3.185 Sodium.resultn | <           | 137.5   | 0.001801302  | 1770 |
| ALB.resultn   | >= | 2.95 ALB.resultn          | >=          | 3.185 Sodium.resultn | >=          | 137.5   | 0.000534296  | 1770 |
| TBILI.resultn | =  | Missing                   |             |                      |             |         | 0.000828491  | 1771 |
| TBILI.resultn | <  | 2.05 ALK.times.uln        | =           | Missing              |             |         | 0            | 1771 |
| TBILI.resultn | <  | 2.05 ALK.times.uln        | <           | 6.115825908          |             |         | -0.000154562 | 1771 |
| TBILI.resultn | <  | 2.05 ALK.times.uln        | >=          | 6.115825908          |             |         | 0.001822509  | 1771 |
| TBILI.resultn | >= | 2.05 PLT.resultn          | =           | Missing              |             |         | 0.001079025  | 1771 |
| TBILI.resultn | >= | 2.05 PLT.resultn          | <           | 229                  |             |         | 0.001629263  | 1771 |
| TBILI.resultn | >= | 2.05 PLT.resultn          | >=          | 229                  |             |         | 0.000578809  | 1771 |
| PLT.resultn   | =  | Missing                   |             |                      |             | Missing | -0.001237142 | 1772 |
| PLT.resultn   | <  | 185.5                     |             |                      |             | Missing | 0.000192726  | 1772 |

|               |    |             |                |    |             |               |              |              |              |      |
|---------------|----|-------------|----------------|----|-------------|---------------|--------------|--------------|--------------|------|
| PLT.resultn   | >= | 185.5       | AST.resultn    | =  | Missing     | Missing       | -0.001329031 | 1772         |              |      |
| PLT.resultn   | >= | 185.5       | AST.resultn    | <  | 144.5       | TBILL.resultn | =            | Missing      | -0.00129231  | 1772 |
| PLT.resultn   | >= | 185.5       | AST.resultn    | <  | 144.5       | TBILL.resultn | <            | 1.65         | -0.001473399 | 1772 |
| PLT.resultn   | >= | 185.5       | AST.resultn    | <  | 144.5       | TBILL.resultn | >=           | 1.65         | 0            | 1772 |
| PLT.resultn   | >= | 185.5       | AST.resultn    | >= | 144.5       | Missing       | -0.001650775 | 1772         |              |      |
| ALK.times.uln | =  | Missing     | AST.resultn    | =  | Missing     |               | 0.000737334  | 1773         |              |      |
| ALK.times.uln | =  | Missing     | AST.resultn    | <  | 109         |               | 0.000926395  | 1773         |              |      |
| ALK.times.uln | =  | Missing     | AST.resultn    | >= | 109         |               | 0            | 1773         |              |      |
| ALK.times.uln | <  | 5.462893197 | age.yrs        | =  | Missing     |               | 0.00033525   | 1773         |              |      |
| ALK.times.uln | <  | 5.462893197 | age.yrs        | <  | 69.76043806 |               | 9.39E-05     | 1773         |              |      |
| ALK.times.uln | <  | 5.462893197 | age.yrs        | >= | 69.76043806 |               | 0.004413606  | 1773         |              |      |
| ALK.times.uln | >= | 5.462893197 |                |    |             |               | 0.001503755  | 1773         |              |      |
| age.yrs       | =  | Missing     |                |    |             |               | 0.000253299  | 1774         |              |      |
| age.yrs       | <  | 49.02395619 | PLT.resultn    | =  | Missing     |               | 0            | 1774         |              |      |
| age.yrs       | <  | 49.02395619 | PLT.resultn    | <  | 187.5       |               | 0.001575783  | 1774         |              |      |
| age.yrs       | <  | 49.02395619 | PLT.resultn    | >= | 187.5       |               | -0.00034842  | 1774         |              |      |
| age.yrs       | >= | 49.02395619 | Sodium.resultn | =  | Missing     |               | 0.000129859  | 1774         |              |      |
| age.yrs       | >= | 49.02395619 | Sodium.resultn | <  | 138.5       |               | 0.003493917  | 1774         |              |      |
| age.yrs       | >= | 49.02395619 | Sodium.resultn | >= | 138.5       |               | 0.000528422  | 1774         |              |      |
| ALK.times.uln | =  | Missing     | TBILL.resultn  | =  | Missing     |               | -0.000447499 | 1775         |              |      |
| ALK.times.uln | =  | Missing     | TBILL.resultn  | <  | 1.5         |               | 0.000344248  | 1775         |              |      |
| ALK.times.uln | =  | Missing     | TBILL.resultn  | >= | 1.5         |               | 0.002617322  | 1775         |              |      |
| ALK.times.uln | <  | 7.861978174 | Sodium.resultn | =  | Missing     |               | 0            | 1775         |              |      |
| ALK.times.uln | <  | 7.861978174 | Sodium.resultn | <  | 137.5       |               | 0.002644465  | 1775         |              |      |
| ALK.times.uln | <  | 7.861978174 | Sodium.resultn | >= | 137.5       |               | 0.000363014  | 1775         |              |      |
| ALK.times.uln | >= | 7.861978174 |                |    |             |               | 2.06E-05     | 1775         |              |      |
| ALB.resultn   | =  | Missing     |                |    |             | Missing       | -0.000555575 | 1776         |              |      |
| ALB.resultn   | <  | 2.95        |                |    |             | Missing       | 0.000362926  | 1776         |              |      |
| ALB.resultn   | >= | 2.95        | TBILL.resultn  | =  | Missing     | Missing       | -0.000893154 | 1776         |              |      |
| ALB.resultn   | >= | 2.95        | TBILL.resultn  | <  | 2.65        | AST.resultn   | =            | Missing      | -0.000895437 | 1776 |
| ALB.resultn   | >= | 2.95        | TBILL.resultn  | <  | 2.65        | AST.resultn   | <            | 64.5         | -0.001557283 | 1776 |
| ALB.resultn   | >= | 2.95        | TBILL.resultn  | <  | 2.65        | AST.resultn   | >=           | 64.5         | 0            | 1776 |
| ALB.resultn   | >= | 2.95        | TBILL.resultn  | >= | 2.65        |               | Missing      | -0.000854713 | 1776         |      |
| age.yrs       | =  | Missing     |                |    |             | Missing       | 0.000318143  | 1777         |              |      |
| age.yrs       | <  | 69.22108145 | TBILL.resultn  | =  | Missing     | Missing       | 0.001725837  | 1777         |              |      |
| age.yrs       | <  | 69.22108145 | TBILL.resultn  | <  | 2.45        | ALK.times.uln | =            | Missing      | 0            | 1777 |
| age.yrs       | <  | 69.22108145 | TBILL.resultn  | <  | 2.45        | ALK.times.uln | <            | 6.338830603  | 8.89E-05     | 1777 |
| age.yrs       | <  | 69.22108145 | TBILL.resultn  | <  | 2.45        | ALK.times.uln | >=           | 6.338830603  | -0.000542109 | 1777 |
| age.yrs       | <  | 69.22108145 | TBILL.resultn  | >= | 2.45        |               | Missing      | 0.001121033  | 1777         |      |
| age.yrs       | >= | 69.22108145 |                |    |             |               | Missing      | 0.002752536  | 1777         |      |
| ALB.resultn   | =  | Missing     |                |    |             |               | Missing      | 0.001654448  | 1778         |      |
| ALB.resultn   | <  | 3.05        |                |    |             |               | Missing      | 0.001755869  | 1778         |      |
| ALB.resultn   | >= | 3.05        | ALK.times.uln  | =  | Missing     | ALB.resultn   | =            | Missing      | 0.000772425  | 1778 |
| ALB.resultn   | >= | 3.05        | ALK.times.uln  | =  | Missing     | ALB.resultn   | <            | 3.95         | 0.002648313  | 1778 |
| ALB.resultn   | >= | 3.05        | ALK.times.uln  | =  | Missing     | ALB.resultn   | >=           | 3.95         | 0            | 1778 |
| ALB.resultn   | >= | 3.05        | ALK.times.uln  | <  | 5.561812335 |               | Missing      | 0.000536254  | 1778         |      |
| ALB.resultn   | >= | 3.05        | ALK.times.uln  | >= | 5.561812335 |               | Missing      | 0.000318269  | 1778         |      |
| TBILL.resultn | =  | Missing     |                |    |             |               | Missing      | -0.000436647 | 1779         |      |
| TBILL.resultn | <  | 1.65        |                |    |             |               | Missing      | 0.000163835  | 1779         |      |
| TBILL.resultn | >= | 1.65        | psc.yrs.dur    | =  | Missing     |               | Missing      | 0.001571177  | 1779         |      |
| TBILL.resultn | >= | 1.65        | psc.yrs.dur    | <  | 2.203969884 | TBILL.resultn | =            | Missing      | 0.001024963  | 1779 |
| TBILL.resultn | >= | 1.65        | psc.yrs.dur    | <  | 2.203969884 | TBILL.resultn | <            | 2.8          | 0.002152421  | 1779 |
| TBILL.resultn | >= | 1.65        | psc.yrs.dur    | <  | 2.203969884 | TBILL.resultn | >=           | 2.8          | 0            | 1779 |
| TBILL.resultn | >= | 1.65        | psc.yrs.dur    | >= | 2.203969884 |               | Missing      | 0.002718226  | 1779         |      |
| age.yrs       | =  | Missing     |                |    |             |               | Missing      | -0.002146433 | 1780         |      |
| age.yrs       | <  | 53.4715948  |                |    |             |               | Missing      | -0.002247374 | 1780         |      |
| age.yrs       | >= | 53.4715948  | AST.resultn    | =  | Missing     |               | Missing      | -0.001891279 | 1780         |      |
| age.yrs       | >= | 53.4715948  | AST.resultn    | <  | 54.5        |               | Missing      | -0.002925231 | 1780         |      |
| age.yrs       | >= | 53.4715948  | AST.resultn    | >= | 54.5        | psc.yrs.dur   | =            | Missing      | -0.000886869 | 1780 |
| age.yrs       | >= | 53.4715948  | AST.resultn    | >= | 54.5        | psc.yrs.dur   | <            | 0.73100616   | -0.001825906 | 1780 |
| age.yrs       | >= | 53.4715948  | AST.resultn    | >= | 54.5        | psc.yrs.dur   | >=           | 0.73100616   | 0            | 1780 |
| ALB.resultn   | =  | Missing     |                |    |             |               | Missing      | -0.001094343 | 1781         |      |

|                |    |                           |    |                         |         |         |              |              |      |
|----------------|----|---------------------------|----|-------------------------|---------|---------|--------------|--------------|------|
| ALB.resultn    | <  | 2.965                     |    |                         |         | Missing | 0.001235013  | 1781         |      |
| ALB.resultn    | >= | 2.965 Sodium.resultn      | =  | Missing                 |         | Missing | -0.000738825 | 1781         |      |
| ALB.resultn    | >= | 2.965 Sodium.resultn      | <  | 136.5                   |         | Missing | 0.002233683  | 1781         |      |
| ALB.resultn    | >= | 2.965 Sodium.resultn      | >= | 136.5 ALB.resultn       | =       | Missing | -6.07E-05    | 1781         |      |
| ALB.resultn    | >= | 2.965 Sodium.resultn      | >= | 136.5 ALB.resultn       | <       | 3.295   | -0.000770993 | 1781         |      |
| ALB.resultn    | >= | 2.965 Sodium.resultn      | >= | 136.5 ALB.resultn       | >=      | 3.295   | 0            | 1781         |      |
| PLT.resultn    | =  | Missing                   |    |                         |         | Missing | -6.46E-06    | 1782         |      |
| PLT.resultn    | <  | 209.5 ALB.resultn         | =  | Missing                 |         | Missing | 0.000558409  | 1782         |      |
| PLT.resultn    | <  | 209.5 ALB.resultn         | <  | 3.62                    |         | Missing | 0.002242314  | 1782         |      |
| PLT.resultn    | <  | 209.5 ALB.resultn         | >= | 3.62 Hemoglobin.resultn | =       | Missing | -2.89E-06    | 1782         |      |
| PLT.resultn    | <  | 209.5 ALB.resultn         | >= | 3.62 Hemoglobin.resultn | <       | 15.35   | -4.66E-06    | 1782         |      |
| PLT.resultn    | <  | 209.5 ALB.resultn         | >= | 3.62 Hemoglobin.resultn | >=      | 15.35   | 0            | 1782         |      |
| PLT.resultn    | >= | 209.5                     |    |                         |         | Missing | 0.000755606  | 1782         |      |
| TBILL.resultn  | =  | Missing                   |    |                         |         |         | 0.001277811  | 1783         |      |
| TBILL.resultn  | <  | 1.95 TBILL.resultn        | =  | Missing                 |         |         | 0.00093561   | 1783         |      |
| TBILL.resultn  | <  | 1.95 TBILL.resultn        | <  | 1.45                    |         |         | 0.00099673   | 1783         |      |
| TBILL.resultn  | <  | 1.95 TBILL.resultn        | >= | 1.45                    |         |         | 0            | 1783         |      |
| TBILL.resultn  | >= | 1.95 ALK.times.uln        | =  | Missing                 |         |         | 0.001322036  | 1783         |      |
| TBILL.resultn  | >= | 1.95 ALK.times.uln        | <  | 4.321484017             |         |         | 0.001102093  | 1783         |      |
| TBILL.resultn  | >= | 1.95 ALK.times.uln        | >= | 4.321484017             |         |         | 0.00154198   | 1783         |      |
| PLT.resultn    | =  | Missing                   |    |                         |         | Missing | -0.002376579 | 1784         |      |
| PLT.resultn    | <  | 185.5                     |    |                         |         | Missing | -0.000585171 | 1784         |      |
| PLT.resultn    | >= | 185.5 TBILL.resultn       | =  | Missing                 |         | Missing | -0.002619489 | 1784         |      |
| PLT.resultn    | >= | 185.5 TBILL.resultn       | <  | 0.95                    |         | Missing | -0.003144364 | 1784         |      |
| PLT.resultn    | >= | 185.5 TBILL.resultn       | >= | 0.95 Hemoglobin.resultn | =       | Missing | 0            | 1784         |      |
| PLT.resultn    | >= | 185.5 TBILL.resultn       | >= | 0.95 Hemoglobin.resultn | <       | 12.1    | -0.002313155 | 1784         |      |
| PLT.resultn    | >= | 185.5 TBILL.resultn       | >= | 0.95 Hemoglobin.resultn | >=      | 12.1    | -0.001813357 | 1784         |      |
| Sodium.resultn | =  | Missing                   |    |                         |         |         | 0.000443257  | 1785         |      |
| Sodium.resultn | <  | 138.5 age.yrs             | =  | Missing                 |         |         | 0.001298211  | 1785         |      |
| Sodium.resultn | <  | 138.5 age.yrs             | <  | 46.10403833             |         |         | 0.000362214  | 1785         |      |
| Sodium.resultn | <  | 138.5 age.yrs             | >= | 46.10403833             |         |         | 0.002323349  | 1785         |      |
| Sodium.resultn | >= | 138.5 age.yrs             | =  | Missing                 |         |         | 0.00048795   | 1785         |      |
| Sodium.resultn | >= | 138.5 age.yrs             | <  | 30.70362765             |         |         | 0.002588255  | 1785         |      |
| Sodium.resultn | >= | 138.5 age.yrs             | >= | 30.70362765             |         |         | 0            | 1785         |      |
| ALB.resultn    | =  | Missing                   |    |                         |         | Missing | -0.00016483  | 1786         |      |
| ALB.resultn    | <  | 3.615 PLT.resultn         | =  | Missing                 |         | Missing | 0.001211446  | 1786         |      |
| ALB.resultn    | <  | 3.615 PLT.resultn         | <  | 223.5                   |         | Missing | 0.003585323  | 1786         |      |
| ALB.resultn    | <  | 3.615 PLT.resultn         | >= | 223.5 TBILL.resultn     | =       | Missing | 0.000420154  | 1786         |      |
| ALB.resultn    | <  | 3.615 PLT.resultn         | >= | 223.5 TBILL.resultn     | <       | 0.65    | 0.001302476  | 1786         |      |
| ALB.resultn    | <  | 3.615 PLT.resultn         | >= | 223.5 TBILL.resultn     | >=      | 0.65    | 0            | 1786         |      |
| ALB.resultn    | >= | 3.615                     |    |                         |         | Missing | -9.18E-05    | 1786         |      |
| ALB.resultn    | =  | Missing                   |    |                         |         | Missing | -0.000440112 | 1787         |      |
| ALB.resultn    | <  | 2.915                     |    |                         |         | Missing | 0.002215731  | 1787         |      |
| ALB.resultn    | >= | 2.915 TBILL.resultn       | =  | Missing                 |         | Missing | 0.000384583  | 1787         |      |
| ALB.resultn    | >= | 2.915 TBILL.resultn       | <  | 2.75 Sodium.resultn     | =       | Missing | 0            | 1787         |      |
| ALB.resultn    | >= | 2.915 TBILL.resultn       | <  | 2.75 Sodium.resultn     | <       | 136.5   | 0.001379984  | 1787         |      |
| ALB.resultn    | >= | 2.915 TBILL.resultn       | <  | 2.75 Sodium.resultn     | >=      | 136.5   | 0.000476832  | 1787         |      |
| ALB.resultn    | >= | 2.915 TBILL.resultn       | >= | 2.75                    |         | Missing | 0.000142795  | 1787         |      |
| age.yrs        | =  | Missing                   |    |                         |         | Missing | 1.60E-05     | 1788         |      |
| age.yrs        | <  | 51.63175907               |    |                         |         | Missing | -0.000295825 | 1788         |      |
| age.yrs        | >= | 51.63175907 ALK.times.uln | =  | Missing                 | age.yrs | =       | Missing      | 0.0013016    | 1788 |
| age.yrs        | >= | 51.63175907 ALK.times.uln | =  | Missing                 | age.yrs | <       | 56.27104723  | 0.002603199  | 1788 |
| age.yrs        | >= | 51.63175907 ALK.times.uln | =  | Missing                 | age.yrs | >=      | 56.27104723  | 0            | 1788 |
| age.yrs        | >= | 51.63175907 ALK.times.uln | <  | 3.904220484             |         | Missing | 3.10E-05     | 1788         |      |
| age.yrs        | >= | 51.63175907 ALK.times.uln | >= | 3.904220484             |         | Missing | 0.001487186  | 1788         |      |
| PLT.resultn    | =  | Missing                   |    |                         |         | Missing | -0.000744591 | 1789         |      |
| PLT.resultn    | <  | 248.5 ALK.times.uln       | =  | Missing                 | age.yrs | =       | Missing      | -0.001224871 | 1789 |
| PLT.resultn    | <  | 248.5 ALK.times.uln       | =  | Missing                 | age.yrs | <       | 53.46475017  | -0.002167079 | 1789 |
| PLT.resultn    | <  | 248.5 ALK.times.uln       | =  | Missing                 | age.yrs | >=      | 53.46475017  | 0            | 1789 |
| PLT.resultn    | <  | 248.5 ALK.times.uln       | <  | 2.905037968             |         | Missing | -0.001928469 | 1789         |      |
| PLT.resultn    | <  | 248.5 ALK.times.uln       | >= | 2.905037968             |         | Missing | 0.001301403  | 1789         |      |
| PLT.resultn    | >= | 248.5                     |    |                         |         | Missing | -0.001944992 | 1789         |      |

|                    |    |             |                    |    |             |               |              |              |              |      |
|--------------------|----|-------------|--------------------|----|-------------|---------------|--------------|--------------|--------------|------|
| age.yrs            | =  | Missing     |                    |    |             | Missing       | -0.001977726 | 1790         |              |      |
| age.yrs            | <  | 54.36824093 |                    |    |             | Missing       | -0.002173829 | 1790         |              |      |
| age.yrs            | >= | 54.36824093 | ALK.times.uln      | =  | Missing     | psc.yrs.dur   | =            | Missing      | -0.001118962 | 1790 |
| age.yrs            | >= | 54.36824093 | ALK.times.uln      | =  | Missing     | psc.yrs.dur   | <            | 0.725530459  | -0.00205143  | 1790 |
| age.yrs            | >= | 54.36824093 | ALK.times.uln      | =  | Missing     | psc.yrs.dur   | >=           | 0.725530459  | 0            | 1790 |
| age.yrs            | >= | 54.36824093 | ALK.times.uln      | <  | 2.086956522 |               | Missing      | -0.002767514 | 1790         |      |
| age.yrs            | >= | 54.36824093 | ALK.times.uln      | >= | 2.086956522 |               | Missing      | 0.001151267  | 1790         |      |
| ALK.times.uln      | =  | Missing     | TBILI.resultn      | =  | Missing     |               |              | -0.000905687 | 1791         |      |
| ALK.times.uln      | =  | Missing     | TBILI.resultn      | <  | 1.55        |               |              | -0.001097779 | 1791         |      |
| ALK.times.uln      | =  | Missing     | TBILI.resultn      | >= | 1.55        |               |              | 1.64E-05     | 1791         |      |
| ALK.times.uln      | <  | 5.446215139 | ALB.resultn        | =  | Missing     |               |              | 0            | 1791         |      |
| ALK.times.uln      | <  | 5.446215139 | ALB.resultn        | <  | 3.11        |               |              | -0.001459284 | 1791         |      |
| ALK.times.uln      | <  | 5.446215139 | ALB.resultn        | >= | 3.11        |               |              | -0.000679567 | 1791         |      |
| ALK.times.uln      | >= | 5.446215139 |                    |    |             |               |              | 0.000611975  | 1791         |      |
| age.yrs            | =  | Missing     |                    |    |             | Missing       | -0.001145304 | 1792         |              |      |
| age.yrs            | <  | 69.84257358 | Sodium.resultn     | =  | Missing     |               | Missing      | -0.001585635 | 1792         |      |
| age.yrs            | <  | 69.84257358 | Sodium.resultn     | <  | 141.5       | TBILI.resultn | =            | Missing      | -0.000908245 | 1792 |
| age.yrs            | <  | 69.84257358 | Sodium.resultn     | <  | 141.5       | TBILI.resultn | <            | 2.05         | -0.001032906 | 1792 |
| age.yrs            | <  | 69.84257358 | Sodium.resultn     | <  | 141.5       | TBILI.resultn | >=           | 2.05         | 0            | 1792 |
| age.yrs            | <  | 69.84257358 | Sodium.resultn     | >= | 141.5       |               | Missing      | -0.00184816  | 1792         |      |
| age.yrs            | >= | 69.84257358 |                    |    |             |               | Missing      | 0.001656722  | 1792         |      |
| age.yrs            | =  | Missing     |                    |    |             | Missing       | Missing      | -0.000188549 | 1793         |      |
| age.yrs            | <  | 69.84257358 | AST.resultn        | =  | Missing     |               | Missing      | -0.001081858 | 1793         |      |
| age.yrs            | <  | 69.84257358 | AST.resultn        | <  | 142.5       | ALK.times.uln | =            | Missing      | 0            | 1793 |
| age.yrs            | <  | 69.84257358 | AST.resultn        | <  | 142.5       | ALK.times.uln | <            | 2.822501299  | -0.000690277 | 1793 |
| age.yrs            | <  | 69.84257358 | AST.resultn        | <  | 142.5       | ALK.times.uln | >=           | 2.822501299  | 0.000818019  | 1793 |
| age.yrs            | <  | 69.84257358 | AST.resultn        | >= | 142.5       |               | Missing      | -0.00086013  | 1793         |      |
| age.yrs            | >= | 69.84257358 |                    |    |             |               | Missing      | 0.003796042  | 1793         |      |
| PLT.resultn        | =  | Missing     |                    |    |             | Missing       | Missing      | 0.000860161  | 1794         |      |
| PLT.resultn        | <  | 171.5       |                    |    |             | Missing       | Missing      | 0.003176465  | 1794         |      |
| PLT.resultn        | >= | 171.5       | ALK.times.uln      | =  | Missing     |               | Missing      | 0.000957161  | 1794         |      |
| PLT.resultn        | >= | 171.5       | ALK.times.uln      | <  | 6.068687487 | TBILI.resultn | =            | Missing      | 0.00117978   | 1794 |
| PLT.resultn        | >= | 171.5       | ALK.times.uln      | <  | 6.068687487 | TBILI.resultn | <            | 1.15         | 0.001472204  | 1794 |
| PLT.resultn        | >= | 171.5       | ALK.times.uln      | <  | 6.068687487 | TBILI.resultn | >=           | 1.15         | 0            | 1794 |
| PLT.resultn        | >= | 171.5       | ALK.times.uln      | >= | 6.068687487 |               | Missing      | 0.000543312  | 1794         |      |
| psc.yrs.dur        | =  | Missing     |                    |    |             |               |              | -2.48E-06    | 1795         |      |
| psc.yrs.dur        | <  | 7.823408624 | Hemoglobin.resultn | =  | Missing     |               |              | 0            | 1795         |      |
| psc.yrs.dur        | <  | 7.823408624 | Hemoglobin.resultn | <  | 12.15       |               |              | -0.000674559 | 1795         |      |
| psc.yrs.dur        | <  | 7.823408624 | Hemoglobin.resultn | >= | 12.15       |               |              | 4.11E-05     | 1795         |      |
| psc.yrs.dur        | >= | 7.823408624 | AST.resultn        | =  | Missing     |               |              | 0.000493656  | 1795         |      |
| psc.yrs.dur        | >= | 7.823408624 | AST.resultn        | <  | 43          |               |              | -0.000871245 | 1795         |      |
| psc.yrs.dur        | >= | 7.823408624 | AST.resultn        | >= | 43          |               |              | 0.001376827  | 1795         |      |
| ALB.resultn        | =  | Missing     |                    |    |             | Missing       | Missing      | -0.000572705 | 1796         |      |
| ALB.resultn        | <  | 2.915       |                    |    |             | Missing       | Missing      | 0.001160083  | 1796         |      |
| ALB.resultn        | >= | 2.915       | TBILI.resultn      | =  | Missing     |               | Missing      | -0.000836825 | 1796         |      |
| ALB.resultn        | >= | 2.915       | TBILI.resultn      | <  | 0.85        |               | Missing      | -0.001236845 | 1796         |      |
| ALB.resultn        | >= | 2.915       | TBILI.resultn      | >= | 0.85        | ALK.times.uln | =            | Missing      | 0            | 1796 |
| ALB.resultn        | >= | 2.915       | TBILI.resultn      | >= | 0.85        | ALK.times.uln | <            | 2.84063745   | -0.001235111 | 1796 |
| ALB.resultn        | >= | 2.915       | TBILI.resultn      | >= | 0.85        | ALK.times.uln | >=           | 2.84063745   | 0.001036898  | 1796 |
| Hemoglobin.resultn | =  | Missing     | TBILI.resultn      | =  | Missing     |               |              | -0.000149302 | 1797         |      |
| Hemoglobin.resultn | =  | Missing     | TBILI.resultn      | <  | 1.4         |               |              | -0.000734321 | 1797         |      |
| Hemoglobin.resultn | =  | Missing     | TBILI.resultn      | >= | 1.4         |               |              | 0.002541785  | 1797         |      |
| Hemoglobin.resultn | <  | 13.85       | ALB.resultn        | =  | Missing     |               |              | -0.000143956 | 1797         |      |
| Hemoglobin.resultn | <  | 13.85       | ALB.resultn        | <  | 3.15        |               |              | -0.001112389 | 1797         |      |
| Hemoglobin.resultn | <  | 13.85       | ALB.resultn        | >= | 3.15        |               |              | 0            | 1797         |      |
| Hemoglobin.resultn | >= | 13.85       |                    |    |             |               |              | -0.001777027 | 1797         |      |
| age.yrs            | =  | Missing     |                    |    |             |               |              | -0.000619554 | 1798         |      |
| age.yrs            | <  | 62.51608487 | Hemoglobin.resultn | =  | Missing     |               |              | 0            | 1798         |      |
| age.yrs            | <  | 62.51608487 | Hemoglobin.resultn | <  | 11.35       |               |              | -0.0012156   | 1798         |      |
| age.yrs            | <  | 62.51608487 | Hemoglobin.resultn | >= | 11.35       |               |              | -0.001248706 | 1798         |      |
| age.yrs            | >= | 62.51608487 | PLT.resultn        | =  | Missing     |               |              | 0.001901551  | 1798         |      |
| age.yrs            | >= | 62.51608487 | PLT.resultn        | <  | 235         |               |              | -0.000991672 | 1798         |      |

|                |    |             |               |    |             |               |         |              |              |      |
|----------------|----|-------------|---------------|----|-------------|---------------|---------|--------------|--------------|------|
| age.yrs        | >= | 62.51608487 | PLT.resultn   | >= | 235         |               |         | 0.005239885  | 1798         |      |
| ALB.resultn    | =  | Missing     | psc.yrs.dur   | =  | Missing     |               |         | 0.0015341    | 1799         |      |
| ALB.resultn    | =  | Missing     | psc.yrs.dur   | <  | 0.366872005 |               |         | 0.00414207   | 1799         |      |
| ALB.resultn    | =  | Missing     | psc.yrs.dur   | >= | 0.366872005 |               |         | 0            | 1799         |      |
| ALB.resultn    | <  | 3.31        | psc.yrs.dur   | =  | Missing     |               |         | 0.001830728  | 1799         |      |
| ALB.resultn    | <  | 3.31        | psc.yrs.dur   | <  | 2.205338809 |               |         | 0.000780825  | 1799         |      |
| ALB.resultn    | <  | 3.31        | psc.yrs.dur   | >= | 2.205338809 |               |         | 0.002799869  | 1799         |      |
| ALB.resultn    | >= | 3.31        |               |    |             |               |         | 0.000514782  | 1799         |      |
| ALK.times.uln  | =  | Missing     | ALB.resultn   | =  | Missing     |               |         | -0.000428524 | 1800         |      |
| ALK.times.uln  | =  | Missing     | ALB.resultn   | <  | 3.95        |               |         | 0.000946426  | 1800         |      |
| ALK.times.uln  | =  | Missing     | ALB.resultn   | >= | 3.95        |               |         | -0.00100745  | 1800         |      |
| ALK.times.uln  | <  | 6.02173913  | TBILL.resultn | =  | Missing     |               |         | -0.001217539 | 1800         |      |
| ALK.times.uln  | <  | 6.02173913  | TBILL.resultn | <  | 1.65        |               |         | -0.00137264  | 1800         |      |
| ALK.times.uln  | <  | 6.02173913  | TBILL.resultn | >= | 1.65        |               |         | 0            | 1800         |      |
| ALK.times.uln  | >= | 6.02173913  |               |    |             |               |         | 0.000207043  | 1800         |      |
| age.yrs        | =  | Missing     |               |    |             | Missing       |         | -0.000564948 | 1801         |      |
| age.yrs        | <  | 69.70978782 | psc.yrs.dur   | =  | Missing     | Missing       |         | -0.000700817 | 1801         |      |
| age.yrs        | <  | 69.70978782 | psc.yrs.dur   | <  | 8.026009582 | TBILL.resultn | =       | Missing      | 0            | 1801 |
| age.yrs        | <  | 69.70978782 | psc.yrs.dur   | <  | 8.026009582 | TBILL.resultn | <       | 3            | -0.000886014 | 1801 |
| age.yrs        | <  | 69.70978782 | psc.yrs.dur   | <  | 8.026009582 | TBILL.resultn | >=      | 3            | -0.001151689 | 1801 |
| age.yrs        | <  | 69.70978782 | psc.yrs.dur   | >= | 8.026009582 |               | Missing |              | 0.000654888  | 1801 |
| age.yrs        | >= | 69.70978782 |               |    |             |               | Missing |              | 0.002750245  | 1801 |
| psc.yrs.dur    | =  | Missing     |               |    |             |               |         | -0.000804804 | 1802         |      |
| psc.yrs.dur    | <  | 1.397672827 | ALB.resultn   | =  | Missing     |               |         | 0            | 1802         |      |
| psc.yrs.dur    | <  | 1.397672827 | ALB.resultn   | <  | 3.185       |               |         | -0.001219798 | 1802         |      |
| psc.yrs.dur    | <  | 1.397672827 | ALB.resultn   | >= | 3.185       |               |         | -0.001206175 | 1802         |      |
| psc.yrs.dur    | >= | 1.397672827 | ALK.times.uln | =  | Missing     |               |         | -0.000563363 | 1802         |      |
| psc.yrs.dur    | >= | 1.397672827 | ALK.times.uln | <  | 2.822501299 |               |         | -0.000800914 | 1802         |      |
| psc.yrs.dur    | >= | 1.397672827 | ALK.times.uln | >= | 2.822501299 |               |         | 0.001337463  | 1802         |      |
| ALK.times.uln  | =  | Missing     |               |    |             | Missing       |         | -0.00425701  | 1803         |      |
| ALK.times.uln  | <  | 2.905037968 |               |    |             | Missing       |         | -0.004599273 | 1803         |      |
| ALK.times.uln  | >= | 2.905037968 | PLT.resultn   | =  | Missing     |               |         | -0.002786551 | 1803         |      |
| ALK.times.uln  | >= | 2.905037968 | PLT.resultn   | <  | 220.5       |               |         | -0.000856844 | 1803         |      |
| ALK.times.uln  | >= | 2.905037968 | PLT.resultn   | >= | 220.5       | ALB.resultn   | =       | Missing      | -0.003268978 | 1803 |
| ALK.times.uln  | >= | 2.905037968 | PLT.resultn   | >= | 220.5       | ALB.resultn   | <       | 4.05         | -0.004396212 | 1803 |
| ALK.times.uln  | >= | 2.905037968 | PLT.resultn   | >= | 220.5       | ALB.resultn   | >=      | 4.05         | 0            | 1803 |
| age.yrs        | =  | Missing     |               |    |             | Missing       |         | -0.001068572 | 1804         |      |
| age.yrs        | <  | 69.84257358 | AST.resultn   | =  | Missing     | Missing       |         | -0.001223354 | 1804         |      |
| age.yrs        | <  | 69.84257358 | AST.resultn   | <  | 150         | TBILL.resultn | =       | Missing      | 0            | 1804 |
| age.yrs        | <  | 69.84257358 | AST.resultn   | <  | 150         | TBILL.resultn | <       | 2.2          | -0.001295731 | 1804 |
| age.yrs        | <  | 69.84257358 | AST.resultn   | <  | 150         | TBILL.resultn | >=      | 2.2          | -7.08E-05    | 1804 |
| age.yrs        | <  | 69.84257358 | AST.resultn   | >= | 150         |               | Missing |              | -0.001749835 | 1804 |
| age.yrs        | >= | 69.84257358 |               |    |             |               | Missing |              | 0.002052878  | 1804 |
| ALK.times.uln  | =  | Missing     |               |    |             | Missing       |         | 0.000598282  | 1805         |      |
| ALK.times.uln  | <  | 5.906840514 | PLT.resultn   | =  | Missing     | Missing       |         | 0.002118823  | 1805         |      |
| ALK.times.uln  | <  | 5.906840514 | PLT.resultn   | <  | 185.5       |               | Missing |              | 0.002543313  | 1805 |
| ALK.times.uln  | <  | 5.906840514 | PLT.resultn   | >= | 185.5       | ALB.resultn   | =       | Missing      | -1.69E-05    | 1805 |
| ALK.times.uln  | <  | 5.906840514 | PLT.resultn   | >= | 185.5       | ALB.resultn   | <       | 3.23         | -0.000238135 | 1805 |
| ALK.times.uln  | <  | 5.906840514 | PLT.resultn   | >= | 185.5       | ALB.resultn   | >=      | 3.23         | 0            | 1805 |
| ALK.times.uln  | >= | 5.906840514 |               |    |             |               | Missing |              | 0.001995007  | 1805 |
| Sodium.resultn | =  | Missing     |               |    |             | Missing       |         | -0.002200158 | 1806         |      |
| Sodium.resultn | <  | 141.5       | ALB.resultn   | =  | Missing     | Missing       |         | -0.001791127 | 1806         |      |
| Sodium.resultn | <  | 141.5       | ALB.resultn   | <  | 3.81        | TBILL.resultn | =       | Missing      | -0.001259747 | 1806 |
| Sodium.resultn | <  | 141.5       | ALB.resultn   | <  | 3.81        | TBILL.resultn | <       | 1.35         | -0.001828665 | 1806 |
| Sodium.resultn | <  | 141.5       | ALB.resultn   | <  | 3.81        | TBILL.resultn | >=      | 1.35         | 0            | 1806 |
| Sodium.resultn | <  | 141.5       | ALB.resultn   | >= | 3.81        |               | Missing |              | -0.002181359 | 1806 |
| Sodium.resultn | >= | 141.5       |               |    |             |               | Missing |              | -0.002553369 | 1806 |
| age.yrs        | =  | Missing     |               |    |             | Missing       |         | 0.000428228  | 1807         |      |
| age.yrs        | <  | 69.84257358 | PLT.resultn   | =  | Missing     | Missing       |         | -0.000576492 | 1807         |      |
| age.yrs        | <  | 69.84257358 | PLT.resultn   | <  | 170.5       |               | Missing |              | 0.001913751  | 1807 |
| age.yrs        | <  | 69.84257358 | PLT.resultn   | >= | 170.5       | TBILL.resultn | =       | Missing      | 0.000351274  | 1807 |
| age.yrs        | <  | 69.84257358 | PLT.resultn   | >= | 170.5       | TBILL.resultn | <       | 3.15         | 0.000374308  | 1807 |

|               |    |             |                |    |             |                |    |             |              |      |
|---------------|----|-------------|----------------|----|-------------|----------------|----|-------------|--------------|------|
| age.yrs       | <  | 69.84257358 | PLT.resultn    | >= | 170.5       | TBILI.resultn  | >= | 3.15        | 0            | 1807 |
| age.yrs       | >= | 69.84257358 |                |    |             |                |    | Missing     | 0.002531013  | 1807 |
| ALB.resultn   | =  | Missing     |                |    |             |                |    | Missing     | -0.001382217 | 1808 |
| ALB.resultn   | <  | 2.965       |                |    |             |                |    | Missing     | -0.000305263 | 1808 |
| ALB.resultn   | >= | 2.965       | ALB.resultn    | =  | Missing     |                |    | Missing     | -0.00128461  | 1808 |
| ALB.resultn   | >= | 2.965       | ALB.resultn    | <  | 3.18        |                |    | Missing     | -0.001646565 | 1808 |
| ALB.resultn   | >= | 2.965       | ALB.resultn    | >= | 3.18        | TBILI.resultn  | =  | Missing     | -0.001266954 | 1808 |
| ALB.resultn   | >= | 2.965       | ALB.resultn    | >= | 3.18        | TBILI.resultn  | <  | 2.05        | -0.001397074 | 1808 |
| ALB.resultn   | >= | 2.965       | ALB.resultn    | >= | 3.18        | TBILI.resultn  | >= | 2.05        | 0            | 1808 |
| age.yrs       | =  | Missing     |                |    |             |                |    | Missing     | -0.001249693 | 1809 |
| age.yrs       | <  | 69.71800137 | Sodium.resultn | =  | Missing     | TBILI.resultn  | =  | Missing     | -0.00178803  | 1809 |
| age.yrs       | <  | 69.71800137 | Sodium.resultn | =  | Missing     | TBILI.resultn  | <  | 1.55        | -0.002047165 | 1809 |
| age.yrs       | <  | 69.71800137 | Sodium.resultn | =  | Missing     | TBILI.resultn  | >= | 1.55        | 0            | 1809 |
| age.yrs       | <  | 69.71800137 | Sodium.resultn | <  | 136.5       |                |    | Missing     | 0.00042836   | 1809 |
| age.yrs       | <  | 69.71800137 | Sodium.resultn | >= | 136.5       |                |    | Missing     | -0.001423983 | 1809 |
| age.yrs       | >= | 69.71800137 |                |    |             |                |    | Missing     | 0.002650204  | 1809 |
| age.yrs       | =  | Missing     |                |    |             |                |    | Missing     | -0.001429771 | 1810 |
| age.yrs       | <  | 69.84257358 | TBILI.resultn  | =  | Missing     |                |    | Missing     | -0.001113832 | 1810 |
| age.yrs       | <  | 69.84257358 | TBILI.resultn  | <  | 2.35        |                |    | Missing     | -0.001705554 | 1810 |
| age.yrs       | <  | 69.84257358 | TBILI.resultn  | >= | 2.35        | psc.yrs.dur    | =  | Missing     | -0.000484531 | 1810 |
| age.yrs       | <  | 69.84257358 | TBILI.resultn  | >= | 2.35        | psc.yrs.dur    | <  | 0.884325804 | -0.000969061 | 1810 |
| age.yrs       | <  | 69.84257358 | TBILI.resultn  | >= | 2.35        | psc.yrs.dur    | >= | 0.884325804 | 0            | 1810 |
| age.yrs       | >= | 69.84257358 |                |    |             |                |    | Missing     | 0.000893993  | 1810 |
| AST.resultn   | =  | Missing     |                |    |             |                |    | Missing     | -0.001028171 | 1811 |
| AST.resultn   | <  | 56.5        |                |    |             |                |    | Missing     | -0.001017097 | 1811 |
| AST.resultn   | >= | 56.5        | AST.resultn    | =  | Missing     |                |    | Missing     | 0.000462032  | 1811 |
| AST.resultn   | >= | 56.5        | AST.resultn    | <  | 65.5        |                |    | Missing     | 0.002291204  | 1811 |
| AST.resultn   | >= | 56.5        | AST.resultn    | >= | 65.5        | ALB.resultn    | =  | Missing     | 0.000147336  | 1811 |
| AST.resultn   | >= | 56.5        | AST.resultn    | >= | 65.5        | ALB.resultn    | <  | 3.31        | 0.001267086  | 1811 |
| AST.resultn   | >= | 56.5        | AST.resultn    | >= | 65.5        | ALB.resultn    | >= | 3.31        | 0            | 1811 |
| ALK.times.uln | =  | Missing     |                |    |             |                |    | Missing     | -0.000108797 | 1812 |
| ALK.times.uln | <  | 6.02173913  | ALB.resultn    | =  | Missing     |                |    | Missing     | 0.002041908  | 1812 |
| ALK.times.uln | <  | 6.02173913  | ALB.resultn    | <  | 3.34        |                |    | Missing     | 0.002168147  | 1812 |
| ALK.times.uln | <  | 6.02173913  | ALB.resultn    | >= | 3.34        | Sodium.resultn | =  | Missing     | 0            | 1812 |
| ALK.times.uln | <  | 6.02173913  | ALB.resultn    | >= | 3.34        | Sodium.resultn | <  | 137.5       | 0.002236009  | 1812 |
| ALK.times.uln | <  | 6.02173913  | ALB.resultn    | >= | 3.34        | Sodium.resultn | >= | 137.5       | -0.000436767 | 1812 |
| ALK.times.uln | >= | 6.02173913  |                |    |             |                |    | Missing     | 0.001704645  | 1812 |
| ALB.resultn   | =  | Missing     | psc.yrs.dur    | =  | Missing     |                |    |             | 0.001610057  | 1813 |
| ALB.resultn   | =  | Missing     | psc.yrs.dur    | <  | 0.102669405 |                |    |             | 0.004347154  | 1813 |
| ALB.resultn   | =  | Missing     | psc.yrs.dur    | >= | 0.102669405 |                |    |             | 0            | 1813 |
| ALB.resultn   | <  | 2.95        |                |    |             |                |    |             | 0.001892382  | 1813 |
| ALB.resultn   | >= | 2.95        | TBILI.resultn  | =  | Missing     |                |    |             | 0.000927194  | 1813 |
| ALB.resultn   | >= | 2.95        | TBILI.resultn  | <  | 2.75        |                |    |             | 0.000961191  | 1813 |
| ALB.resultn   | >= | 2.95        | TBILI.resultn  | >= | 2.75        |                |    |             | 0.000473901  | 1813 |
| ALK.times.uln | =  | Missing     | TBILI.resultn  | =  | Missing     |                |    | Missing     | -0.00227811  | 1814 |
| ALK.times.uln | =  | Missing     | TBILI.resultn  | <  | 0.95        |                |    | Missing     | -0.003052382 | 1814 |
| ALK.times.uln | =  | Missing     | TBILI.resultn  | >= | 0.95        | age.yrs        | =  | Missing     | -0.000923134 | 1814 |
| ALK.times.uln | =  | Missing     | TBILI.resultn  | >= | 0.95        | age.yrs        | <  | 39.44969199 | -0.001846268 | 1814 |
| ALK.times.uln | =  | Missing     | TBILI.resultn  | >= | 0.95        | age.yrs        | >= | 39.44969199 | 0            | 1814 |
| ALK.times.uln | <  | 7.868810472 |                |    |             |                |    | Missing     | -0.001944639 | 1814 |
| ALK.times.uln | >= | 7.868810472 |                |    |             |                |    | Missing     | -0.002776448 | 1814 |
| psc.yrs.dur   | =  | Missing     |                |    |             |                |    |             | -0.00056348  | 1815 |
| psc.yrs.dur   | <  | 8.020533881 | ALB.resultn    | =  | Missing     |                |    |             | 0            | 1815 |
| psc.yrs.dur   | <  | 8.020533881 | ALB.resultn    | <  | 3.135       |                |    |             | -0.00117387  | 1815 |
| psc.yrs.dur   | <  | 8.020533881 | ALB.resultn    | >= | 3.135       |                |    |             | -0.000761872 | 1815 |
| psc.yrs.dur   | >= | 8.020533881 | ALB.resultn    | =  | Missing     |                |    |             | 0.000782749  | 1815 |
| psc.yrs.dur   | >= | 8.020533881 | ALB.resultn    | <  | 3.665       |                |    |             | 0.002456089  | 1815 |
| psc.yrs.dur   | >= | 8.020533881 | ALB.resultn    | >= | 3.665       |                |    |             | -0.000504435 | 1815 |
| age.yrs       | =  | Missing     |                |    |             |                |    | Missing     | 0.000832773  | 1816 |
| age.yrs       | <  | 70.4202601  | ALK.times.uln  | =  | Missing     |                |    | Missing     | 0.001098201  | 1816 |
| age.yrs       | <  | 70.4202601  | ALK.times.uln  | <  | 5.462893197 |                |    | Missing     | 0.0003957    | 1816 |
| age.yrs       | <  | 70.4202601  | ALK.times.uln  | >= | 5.462893197 | ALK.times.uln  | =  | Missing     | 0.001364597  | 1816 |

|                    |    |             |                    |    |             |               |    |             |              |      |
|--------------------|----|-------------|--------------------|----|-------------|---------------|----|-------------|--------------|------|
| age.yrs            | <  | 70.4202601  | ALK.times.uln      | >= | 5.462893197 | ALK.times.uln | <  | 7.794978567 | 0.002729194  | 1816 |
| age.yrs            | <  | 70.4202601  | ALK.times.uln      | >= | 5.462893197 | ALK.times.uln | >= | 7.794978567 | 0            | 1816 |
| age.yrs            | >= | 70.4202601  |                    |    |             |               |    | Missing     | 0.005010268  | 1816 |
| AST.resultn        | =  | Missing     |                    |    |             |               |    | Missing     | -0.001270326 | 1817 |
| AST.resultn        | <  | 211.5       | Sodium.resultn     | =  | Missing     |               |    | Missing     | -0.00116534  | 1817 |
| AST.resultn        | <  | 211.5       | Sodium.resultn     | <  | 141.5       | age.yrs       | =  | Missing     | -0.001238098 | 1817 |
| AST.resultn        | <  | 211.5       | Sodium.resultn     | <  | 141.5       | age.yrs       | <  | 51.53319644 | -0.001711938 | 1817 |
| AST.resultn        | <  | 211.5       | Sodium.resultn     | <  | 141.5       | age.yrs       | >= | 51.53319644 | 0            | 1817 |
| AST.resultn        | <  | 211.5       | Sodium.resultn     | >= | 141.5       |               |    | Missing     | -0.00196481  | 1817 |
| AST.resultn        | >= | 211.5       |                    |    |             |               |    | Missing     | 0.000207448  | 1817 |
| Hemoglobin.resultn | =  | Missing     | ALB.resultn        | =  | Missing     |               |    |             | -0.002056784 | 1818 |
| Hemoglobin.resultn | =  | Missing     | ALB.resultn        | <  | 3.75        |               |    |             | 0.001624191  | 1818 |
| Hemoglobin.resultn | =  | Missing     | ALB.resultn        | >= | 3.75        |               |    |             | -0.000468897 | 1818 |
| Hemoglobin.resultn | <  | 12.25       |                    |    |             |               |    |             | -0.001397604 | 1818 |
| Hemoglobin.resultn | >= | 12.25       | TBILL.resultn      | =  | Missing     |               |    |             | -0.001876264 | 1818 |
| Hemoglobin.resultn | >= | 12.25       | TBILL.resultn      | <  | 2.05        |               |    |             | -0.002072291 | 1818 |
| Hemoglobin.resultn | >= | 12.25       | TBILL.resultn      | >= | 2.05        |               |    |             | 0            | 1818 |
| PLT.resultn        | =  | Missing     |                    |    |             |               |    | Missing     | -0.003965352 | 1819 |
| PLT.resultn        | <  | 249.5       | age.yrs            | =  | Missing     |               |    | Missing     | -0.002894336 | 1819 |
| PLT.resultn        | <  | 249.5       | age.yrs            | <  | 53.35934292 |               |    | Missing     | -0.003587971 | 1819 |
| PLT.resultn        | <  | 249.5       | age.yrs            | >= | 53.35934292 | psc.yrs.dur   | =  | Missing     | -0.001572094 | 1819 |
| PLT.resultn        | <  | 249.5       | age.yrs            | >= | 53.35934292 | psc.yrs.dur   | <  | 0.425735797 | -0.004573364 | 1819 |
| PLT.resultn        | <  | 249.5       | age.yrs            | >= | 53.35934292 | psc.yrs.dur   | >= | 0.425735797 | 0            | 1819 |
| PLT.resultn        | >= | 249.5       |                    |    |             |               |    | Missing     | -0.00424677  | 1819 |
| ALB.resultn        | =  | Missing     |                    |    |             |               |    |             | 0.000376968  | 1820 |
| ALB.resultn        | <  | 3.31        | TBILL.resultn      | =  | Missing     |               |    |             | 0.001194647  | 1820 |
| ALB.resultn        | <  | 3.31        | TBILL.resultn      | <  | 1.31        |               |    |             | 0.000786216  | 1820 |
| ALB.resultn        | <  | 3.31        | TBILL.resultn      | >= | 1.31        |               |    |             | 0.001807293  | 1820 |
| ALB.resultn        | >= | 3.31        | TBILL.resultn      | =  | Missing     |               |    |             | 0.000473291  | 1820 |
| ALB.resultn        | >= | 3.31        | TBILL.resultn      | <  | 2.65        |               |    |             | 0.000506731  | 1820 |
| ALB.resultn        | >= | 3.31        | TBILL.resultn      | >= | 2.65        |               |    |             | 0            | 1820 |
| psc.yrs.dur        | =  | Missing     |                    |    |             |               |    |             | 0.000241383  | 1821 |
| psc.yrs.dur        | <  | 7.823408624 | ALK.times.uln      | =  | Missing     |               |    |             | 0            | 1821 |
| psc.yrs.dur        | <  | 7.823408624 | ALK.times.uln      | <  | 6.338830603 |               |    |             | 0.000254424  | 1821 |
| psc.yrs.dur        | <  | 7.823408624 | ALK.times.uln      | >= | 6.338830603 |               |    |             | -0.000341042 | 1821 |
| psc.yrs.dur        | >= | 7.823408624 | age.yrs            | =  | Missing     |               |    |             | 0.00105871   | 1821 |
| psc.yrs.dur        | >= | 7.823408624 | age.yrs            | <  | 54.65571526 |               |    |             | 0.00270205   | 1821 |
| psc.yrs.dur        | >= | 7.823408624 | age.yrs            | >= | 54.65571526 |               |    |             | -0.000748964 | 1821 |
| age.yrs            | =  | Missing     |                    |    |             |               |    | Missing     | -2.33E-05    | 1822 |
| age.yrs            | <  | 69.84257358 | psc.yrs.dur        | =  | Missing     |               |    | Missing     | -0.000207798 | 1822 |
| age.yrs            | <  | 69.84257358 | psc.yrs.dur        | <  | 1.397672827 |               |    | Missing     | -0.000556845 | 1822 |
| age.yrs            | <  | 69.84257358 | psc.yrs.dur        | >= | 1.397672827 | psc.yrs.dur   | =  | Missing     | 0.000414067  | 1822 |
| age.yrs            | <  | 69.84257358 | psc.yrs.dur        | >= | 1.397672827 | psc.yrs.dur   | <  | 2.92128679  | 0.001440952  | 1822 |
| age.yrs            | <  | 69.84257358 | psc.yrs.dur        | >= | 1.397672827 | psc.yrs.dur   | >= | 2.92128679  | 0            | 1822 |
| age.yrs            | >= | 69.84257358 |                    |    |             |               |    | Missing     | 0.003697657  | 1822 |
| PLT.resultn        | =  | Missing     |                    |    |             |               |    | Missing     | -0.001632654 | 1823 |
| PLT.resultn        | <  | 249.5       | Hemoglobin.resultn | =  | Missing     | age.yrs       | =  | Missing     | -0.001219    | 1823 |
| PLT.resultn        | <  | 249.5       | Hemoglobin.resultn | =  | Missing     | age.yrs       | <  | 53.46475017 | -0.002234832 | 1823 |
| PLT.resultn        | <  | 249.5       | Hemoglobin.resultn | =  | Missing     | age.yrs       | >= | 53.46475017 | 0            | 1823 |
| PLT.resultn        | <  | 249.5       | Hemoglobin.resultn | <  | 14.15       |               |    | Missing     | 0.00054852   | 1823 |
| PLT.resultn        | <  | 249.5       | Hemoglobin.resultn | >= | 14.15       |               |    | Missing     | -0.002316304 | 1823 |
| PLT.resultn        | >= | 249.5       |                    |    |             |               |    | Missing     | -0.001965897 | 1823 |
| age.yrs            | =  | Missing     |                    |    |             |               |    | Missing     | -0.000361333 | 1824 |
| age.yrs            | <  | 68.58726899 | ALK.times.uln      | =  | Missing     |               |    | Missing     | -0.00069753  | 1824 |
| age.yrs            | <  | 68.58726899 | ALK.times.uln      | <  | 5.88491132  | ALB.resultn   | =  | Missing     | 0            | 1824 |
| age.yrs            | <  | 68.58726899 | ALK.times.uln      | <  | 5.88491132  | ALB.resultn   | <  | 3.345       | 0.001060242  | 1824 |
| age.yrs            | <  | 68.58726899 | ALK.times.uln      | <  | 5.88491132  | ALB.resultn   | >= | 3.345       | -0.000548735 | 1824 |
| age.yrs            | <  | 68.58726899 | ALK.times.uln      | >= | 5.88491132  |               |    | Missing     | 0.000407795  | 1824 |
| age.yrs            | >= | 68.58726899 |                    |    |             |               |    | Missing     | 0.001569423  | 1824 |
| PLT.resultn        | =  | Missing     |                    |    |             |               |    | Missing     | -0.000484938 | 1825 |
| PLT.resultn        | <  | 413         | ALB.resultn        | =  | Missing     |               |    | Missing     | 0.000258047  | 1825 |
| PLT.resultn        | <  | 413         | ALB.resultn        | <  | 3.27        |               |    | Missing     | -0.000742158 | 1825 |

|                    |    |             |                    |    |         |               |    |             |              |      |
|--------------------|----|-------------|--------------------|----|---------|---------------|----|-------------|--------------|------|
| PLT.resultn        | <  | 413         | ALB.resultn        | >= | 3.27    | ALK.times.uln | =  | Missing     | 0            | 1825 |
| PLT.resultn        | <  | 413         | ALB.resultn        | >= | 3.27    | ALK.times.uln | <  | 3.17826087  | -0.000753015 | 1825 |
| PLT.resultn        | <  | 413         | ALB.resultn        | >= | 3.27    | ALK.times.uln | >= | 3.17826087  | 0.001021463  | 1825 |
| PLT.resultn        | >= | 413         |                    |    |         |               |    | Missing     | 0.000690321  | 1825 |
| Sodium.resultn     | =  | Missing     |                    |    |         |               |    | Missing     | -0.000684716 | 1826 |
| Sodium.resultn     | <  | 138.5       | ALB.resultn        | =  | Missing |               |    | Missing     | -0.000278685 | 1826 |
| Sodium.resultn     | <  | 138.5       | ALB.resultn        | <  | 3.535   |               |    | Missing     | 0.001092932  | 1826 |
| Sodium.resultn     | <  | 138.5       | ALB.resultn        | >= | 3.535   | TBILL.resultn | =  | Missing     | -0.000697791 | 1826 |
| Sodium.resultn     | <  | 138.5       | ALB.resultn        | >= | 3.535   | TBILL.resultn | <  | 0.95        | -0.001395581 | 1826 |
| Sodium.resultn     | <  | 138.5       | ALB.resultn        | >= | 3.535   | TBILL.resultn | >= | 0.95        | 0            | 1826 |
| Sodium.resultn     | >= | 138.5       |                    |    |         |               |    | Missing     | -0.000771933 | 1826 |
| age.yrs            | =  | Missing     |                    |    |         |               |    | Missing     | -0.000563334 | 1827 |
| age.yrs            | <  | 69.84257358 | Sodium.resultn     | =  | Missing | TBILL.resultn | =  | Missing     | 0            | 1827 |
| age.yrs            | <  | 69.84257358 | Sodium.resultn     | =  | Missing | TBILL.resultn | <  | 1.6         | -0.001486453 | 1827 |
| age.yrs            | <  | 69.84257358 | Sodium.resultn     | =  | Missing | TBILL.resultn | >= | 1.6         | 0.000202572  | 1827 |
| age.yrs            | <  | 69.84257358 | Sodium.resultn     | <  | 136.5   |               |    | Missing     | 0.001205551  | 1827 |
| age.yrs            | <  | 69.84257358 | Sodium.resultn     | >= | 136.5   |               |    | Missing     | -0.000878065 | 1827 |
| age.yrs            | >= | 69.84257358 |                    |    |         |               |    | Missing     | 0.003962482  | 1827 |
| TBILL.resultn      | =  | Missing     |                    |    |         |               |    | Missing     | -0.001616266 | 1828 |
| TBILL.resultn      | <  | 1.65        |                    |    |         |               |    | Missing     | -0.000946995 | 1828 |
| TBILL.resultn      | >= | 1.65        | ALB.resultn        | =  | Missing |               |    | Missing     | 7.61E-05     | 1828 |
| TBILL.resultn      | >= | 1.65        | ALB.resultn        | <  | 3.545   |               |    | Missing     | 0.001268107  | 1828 |
| TBILL.resultn      | >= | 1.65        | ALB.resultn        | >= | 3.545   | ALB.resultn   | =  | Missing     | -0.000519957 | 1828 |
| TBILL.resultn      | >= | 1.65        | ALB.resultn        | >= | 3.545   | ALB.resultn   | <  | 4.05        | -0.001039914 | 1828 |
| TBILL.resultn      | >= | 1.65        | ALB.resultn        | >= | 3.545   | ALB.resultn   | >= | 4.05        | 0            | 1828 |
| Hemoglobin.resultn | =  | Missing     |                    |    |         |               |    | Missing     | -0.0004574   | 1829 |
| Hemoglobin.resultn | <  | 14.15       | PLT.resultn        | =  | Missing |               |    | Missing     | 0.000109195  | 1829 |
| Hemoglobin.resultn | <  | 14.15       | PLT.resultn        | <  | 250     | psc.yrs.dur   | =  | Missing     | 0.001768623  | 1829 |
| Hemoglobin.resultn | <  | 14.15       | PLT.resultn        | <  | 250     | psc.yrs.dur   | <  | 2.707734428 | 0.003017063  | 1829 |
| Hemoglobin.resultn | <  | 14.15       | PLT.resultn        | <  | 250     | psc.yrs.dur   | >= | 2.707734428 | 0            | 1829 |
| Hemoglobin.resultn | <  | 14.15       | PLT.resultn        | >= | 250     |               |    | Missing     | -0.000499962 | 1829 |
| Hemoglobin.resultn | >= | 14.15       |                    |    |         |               |    | Missing     | -0.001015317 | 1829 |
| psc.yrs.dur        | =  | Missing     |                    |    |         |               |    | Missing     | -0.000879538 | 1830 |
| psc.yrs.dur        | <  | 13.06228611 | TBILL.resultn      | =  | Missing |               |    | Missing     | -0.00172559  | 1830 |
| psc.yrs.dur        | <  | 13.06228611 | TBILL.resultn      | <  | 3.75    | TBILL.resultn | =  | Missing     | -0.000933939 | 1830 |
| psc.yrs.dur        | <  | 13.06228611 | TBILL.resultn      | <  | 3.75    | TBILL.resultn | <  | 2.25        | -0.001006832 | 1830 |
| psc.yrs.dur        | <  | 13.06228611 | TBILL.resultn      | <  | 3.75    | TBILL.resultn | >= | 2.25        | 0            | 1830 |
| psc.yrs.dur        | <  | 13.06228611 | TBILL.resultn      | >= | 3.75    |               |    | Missing     | -0.001400167 | 1830 |
| psc.yrs.dur        | >= | 13.06228611 |                    |    |         |               |    | Missing     | 0.001910674  | 1830 |
| TBILL.resultn      | =  | Missing     |                    |    |         |               |    | Missing     | -0.000510332 | 1831 |
| TBILL.resultn      | <  | 3.75        | AST.resultn        | =  | Missing |               |    | Missing     | -0.002165057 | 1831 |
| TBILL.resultn      | <  | 3.75        | AST.resultn        | <  | 47.5    |               |    | Missing     | -0.002952979 | 1831 |
| TBILL.resultn      | <  | 3.75        | AST.resultn        | >= | 47.5    | age.yrs       | =  | Missing     | -0.001498846 | 1831 |
| TBILL.resultn      | <  | 3.75        | AST.resultn        | >= | 47.5    | age.yrs       | <  | 55.80971937 | -0.001881205 | 1831 |
| TBILL.resultn      | <  | 3.75        | AST.resultn        | >= | 47.5    | age.yrs       | >= | 55.80971937 | 0            | 1831 |
| TBILL.resultn      | >= | 3.75        |                    |    |         |               |    | Missing     | -0.002573464 | 1831 |
| age.yrs            | =  | Missing     |                    |    |         |               |    | Missing     | -0.000620885 | 1832 |
| age.yrs            | <  | 53.64681725 |                    |    |         |               |    | Missing     | -0.000992634 | 1832 |
| age.yrs            | >= | 53.64681725 | AST.resultn        | =  | Missing |               |    | Missing     | 0.000416683  | 1832 |
| age.yrs            | >= | 53.64681725 | AST.resultn        | <  | 51      |               |    | Missing     | -0.001491065 | 1832 |
| age.yrs            | >= | 53.64681725 | AST.resultn        | >= | 51      | AST.resultn   | =  | Missing     | 0.002324431  | 1832 |
| age.yrs            | >= | 53.64681725 | AST.resultn        | >= | 51      | AST.resultn   | <  | 72          | 0.005479015  | 1832 |
| age.yrs            | >= | 53.64681725 | AST.resultn        | >= | 51      | AST.resultn   | >= | 72          | 0            | 1832 |
| ALB.resultn        | =  | Missing     |                    |    |         |               |    | Missing     | 0.000135207  | 1833 |
| ALB.resultn        | <  | 2.915       |                    |    |         |               |    | Missing     | 0.001399216  | 1833 |
| ALB.resultn        | >= | 2.915       | Hemoglobin.resultn | =  | Missing |               |    | Missing     | 0.001090715  | 1833 |
| ALB.resultn        | >= | 2.915       | Hemoglobin.resultn | <  | 12.35   | ALK.times.uln | =  | Missing     | 0.000325677  | 1833 |
| ALB.resultn        | >= | 2.915       | Hemoglobin.resultn | <  | 12.35   | ALK.times.uln | <  | 2.328461538 | 0.000537367  | 1833 |
| ALB.resultn        | >= | 2.915       | Hemoglobin.resultn | <  | 12.35   | ALK.times.uln | >= | 2.328461538 | 0            | 1833 |
| ALB.resultn        | >= | 2.915       | Hemoglobin.resultn | >= | 12.35   |               |    | Missing     | 0.000572506  | 1833 |
| age.yrs            | =  | Missing     |                    |    |         |               |    | Missing     | -0.001055245 | 1834 |
| age.yrs            | <  | 49.03353867 |                    |    |         |               |    | Missing     | -0.001465713 | 1834 |



|               |    |             |                |    |                  |               |              |              |              |      |
|---------------|----|-------------|----------------|----|------------------|---------------|--------------|--------------|--------------|------|
| age.yrs       | >= | 49.03353867 | ALB.resultn    | =  | Missing          | Missing       | -0.000379684 | 1834         |              |      |
| age.yrs       | >= | 49.03353867 | ALB.resultn    | <  | 3.31             | Missing       | 0.001972557  | 1834         |              |      |
| age.yrs       | >= | 49.03353867 | ALB.resultn    | >= | 3.31 psc.yrs.dur | =             | Missing      | -0.000741567 | 1834         |      |
| age.yrs       | >= | 49.03353867 | ALB.resultn    | >= | 3.31 psc.yrs.dur | <             | 1.954825462  | -0.001377195 | 1834         |      |
| age.yrs       | >= | 49.03353867 | ALB.resultn    | >= | 3.31 psc.yrs.dur | >=            | 1.954825462  | 0            | 1834         |      |
| AST.resultn   | =  | Missing     |                |    |                  | Missing       | -0.001479088 | 1835         |              |      |
| AST.resultn   | <  | 213.5       | TBILL.resultn  | =  | Missing          | Missing       | -0.000428992 | 1835         |              |      |
| AST.resultn   | <  | 213.5       | TBILL.resultn  | <  | 3 ALB.resultn    | =             | Missing      | 0            | 1835         |      |
| AST.resultn   | <  | 213.5       | TBILL.resultn  | <  | 3 ALB.resultn    | <             | 3.185        | -0.001059195 | 1835         |      |
| AST.resultn   | <  | 213.5       | TBILL.resultn  | <  | 3 ALB.resultn    | >=            | 3.185        | -0.000396703 | 1835         |      |
| AST.resultn   | <  | 213.5       | TBILL.resultn  | >= | 3                | Missing       | -0.000851601 | 1835         |              |      |
| AST.resultn   | >= | 213.5       |                |    |                  | Missing       | 0.002358017  | 1835         |              |      |
| AST.resultn   | =  | Missing     |                |    |                  | Missing       | -0.001087403 | 1836         |              |      |
| AST.resultn   | <  | 136         | ALK.times.uln  | =  | Missing          | TBILL.resultn | =            | Missing      | -0.001049856 | 1836 |
| AST.resultn   | <  | 136         | ALK.times.uln  | =  | Missing          | TBILL.resultn | <            | 1.15         | -0.001490118 | 1836 |
| AST.resultn   | <  | 136         | ALK.times.uln  | =  | Missing          | TBILL.resultn | >=           | 1.15         | 0            | 1836 |
| AST.resultn   | <  | 136         | ALK.times.uln  | <  | 5.462893197      |               | Missing      | -0.001060617 | 1836         |      |
| AST.resultn   | <  | 136         | ALK.times.uln  | >= | 5.462893197      |               | Missing      | 0.000168474  | 1836         |      |
| AST.resultn   | >= | 136         |                |    |                  | Missing       | -0.001667104 | 1836         |              |      |
| AST.resultn   | =  | Missing     |                |    |                  | Missing       | -0.000590826 | 1837         |              |      |
| AST.resultn   | <  | 213.5       | Sodium.resultn | =  | Missing          |               | Missing      | -2.51E-05    | 1837         |      |
| AST.resultn   | <  | 213.5       | Sodium.resultn | <  | 136.5            |               | Missing      | 0.001673272  | 1837         |      |
| AST.resultn   | <  | 213.5       | Sodium.resultn | >= | 136.5            | TBILL.resultn | =            | Missing      | 0.000289019  | 1837 |
| AST.resultn   | <  | 213.5       | Sodium.resultn | >= | 136.5            | TBILL.resultn | <            | 1.15         | 0.000408396  | 1837 |
| AST.resultn   | <  | 213.5       | Sodium.resultn | >= | 136.5            | TBILL.resultn | >=           | 1.15         | 0            | 1837 |
| AST.resultn   | >= | 213.5       |                |    |                  | Missing       | 0.003099799  | 1837         |              |      |
| age.yrs       | =  | Missing     |                |    |                  | Missing       | 0.000144368  | 1838         |              |      |
| age.yrs       | <  | 69.76043806 | ALK.times.uln  | =  | Missing          |               | Missing      | -1.52E-05    | 1838         |      |
| age.yrs       | <  | 69.76043806 | ALK.times.uln  | <  | 5.462893197      |               | Missing      | -0.000157893 | 1838         |      |
| age.yrs       | <  | 69.76043806 | ALK.times.uln  | >= | 5.462893197      | ALK.times.uln | =            | Missing      | 0.000812516  | 1838 |
| age.yrs       | <  | 69.76043806 | ALK.times.uln  | >= | 5.462893197      | ALK.times.uln | <            | 7.801810865  | 0.001698898  | 1838 |
| age.yrs       | <  | 69.76043806 | ALK.times.uln  | >= | 5.462893197      | ALK.times.uln | >=           | 7.801810865  | 0            | 1838 |
| age.yrs       | >= | 69.76043806 |                |    |                  |               | Missing      | 0.003975541  | 1838         |      |
| ALK.times.uln | =  | Missing     |                |    |                  |               | Missing      | 0.0010325    | 1839         |      |
| ALK.times.uln | <  | 5.963877551 | PLT.resultn    | =  | Missing          |               | Missing      | -1.69E-05    | 1839         |      |
| ALK.times.uln | <  | 5.963877551 | PLT.resultn    | <  | 185.5            |               | Missing      | 0.002880361  | 1839         |      |
| ALK.times.uln | <  | 5.963877551 | PLT.resultn    | >= | 185.5            | TBILL.resultn | =            | Missing      | 0.000417688  | 1839 |
| ALK.times.uln | <  | 5.963877551 | PLT.resultn    | >= | 185.5            | TBILL.resultn | <            | 1.15         | 0.000544144  | 1839 |
| ALK.times.uln | <  | 5.963877551 | PLT.resultn    | >= | 185.5            | TBILL.resultn | >=           | 1.15         | 0            | 1839 |
| ALK.times.uln | >= | 5.963877551 |                |    |                  |               | Missing      | 0.001765355  | 1839         |      |
| ALK.times.uln | =  | Missing     | psc.yrs.dur    | =  | Missing          |               |              | -0.001586465 | 1840         |      |
| ALK.times.uln | =  | Missing     | psc.yrs.dur    | <  | 10.32580424      |               |              | -0.001924011 | 1840         |      |
| ALK.times.uln | =  | Missing     | psc.yrs.dur    | >= | 10.32580424      |               |              | 0            | 1840         |      |
| ALK.times.uln | <  | 5.92438247  | TBILL.resultn  | =  | Missing          |               |              | -0.0014709   | 1840         |      |
| ALK.times.uln | <  | 5.92438247  | TBILL.resultn  | <  | 2.65             |               |              | -0.001572098 | 1840         |      |
| ALK.times.uln | <  | 5.92438247  | TBILL.resultn  | >= | 2.65             |               |              | 0.000229238  | 1840         |      |
| ALK.times.uln | >= | 5.92438247  |                |    |                  |               |              | -0.000358551 | 1840         |      |
| ALB.resultn   | =  | Missing     |                |    |                  |               | Missing      | -0.004362292 | 1841         |      |
| ALB.resultn   | <  | 3.615       | PLT.resultn    | =  | Missing          |               | Missing      | -0.003326838 | 1841         |      |
| ALB.resultn   | <  | 3.615       | PLT.resultn    | <  | 268              | TBILL.resultn | =            | Missing      | -0.002155718 | 1841 |
| ALB.resultn   | <  | 3.615       | PLT.resultn    | <  | 268              | TBILL.resultn | <            | 1            | -0.004311436 | 1841 |
| ALB.resultn   | <  | 3.615       | PLT.resultn    | <  | 268              | TBILL.resultn | >=           | 1            | 0            | 1841 |
| ALB.resultn   | <  | 3.615       | PLT.resultn    | >= | 268              |               | Missing      | -0.004357424 | 1841         |      |
| ALB.resultn   | >= | 3.615       |                |    |                  |               | Missing      | -0.003424791 | 1841         |      |
| TBILL.resultn | =  | Missing     |                |    |                  |               | Missing      | -0.000734599 | 1842         |      |
| TBILL.resultn | <  | 3.5         | psc.yrs.dur    | =  | Missing          |               | Missing      | -0.000637003 | 1842         |      |
| TBILL.resultn | <  | 3.5         | psc.yrs.dur    | <  | 0.004106776      |               | Missing      | 0.00097336   | 1842         |      |
| TBILL.resultn | <  | 3.5         | psc.yrs.dur    | >= | 0.004106776      | PLT.resultn   | =            | Missing      | 0            | 1842 |
| TBILL.resultn | <  | 3.5         | psc.yrs.dur    | >= | 0.004106776      | PLT.resultn   | <            | 183.5        | -0.001110327 | 1842 |
| TBILL.resultn | <  | 3.5         | psc.yrs.dur    | >= | 0.004106776      | PLT.resultn   | >=           | 183.5        | -0.000852969 | 1842 |
| TBILL.resultn | >= | 3.5         |                |    |                  |               | Missing      | 0.00063829   | 1842         |      |
| ALK.times.uln | =  | Missing     | ALB.resultn    | =  | Missing          |               |              | 0            | 1843         |      |

|                    |    |             |                    |    |             |             |         |              |              |      |
|--------------------|----|-------------|--------------------|----|-------------|-------------|---------|--------------|--------------|------|
| ALK.times.uln      | =  | Missing     | ALB.resultn        | <  | 3.95        |             |         | 0.001574912  | 1843         |      |
| ALK.times.uln      | =  | Missing     | ALB.resultn        | >= | 3.95        |             |         | 8.69E-06     | 1843         |      |
| ALK.times.uln      | <  | 5.446215139 |                    |    |             |             |         | 0.000522991  | 1843         |      |
| ALK.times.uln      | >= | 5.446215139 | AST.resultn        | =  | Missing     |             |         | 0.00290497   | 1843         |      |
| ALK.times.uln      | >= | 5.446215139 | AST.resultn        | <  | 130         |             |         | 0.005053814  | 1843         |      |
| ALK.times.uln      | >= | 5.446215139 | AST.resultn        | >= | 130         |             |         | 0.000756126  | 1843         |      |
| psc.yrs.dur        | =  | Missing     |                    |    |             |             | Missing | -0.002201747 | 1844         |      |
| psc.yrs.dur        | <  | 6.410677618 |                    |    |             |             | Missing | -0.00228097  | 1844         |      |
| psc.yrs.dur        | >= | 6.410677618 | AST.resultn        | =  | Missing     |             | Missing | -0.001765005 | 1844         |      |
| psc.yrs.dur        | >= | 6.410677618 | AST.resultn        | <  | 43          |             | Missing | -0.00307264  | 1844         |      |
| psc.yrs.dur        | >= | 6.410677618 | AST.resultn        | >= | 43          | age.yrs     | =       | Missing      | -0.000653515 | 1844 |
| psc.yrs.dur        | >= | 6.410677618 | AST.resultn        | >= | 43          | age.yrs     | <       | 49.66735113  | -0.00130703  | 1844 |
| psc.yrs.dur        | >= | 6.410677618 | AST.resultn        | >= | 43          | age.yrs     | >=      | 49.66735113  | 0            | 1844 |
| PLT.resultn        | =  | Missing     | TBILL.resultn      | =  | Missing     |             |         | -0.00180537  | 1845         |      |
| PLT.resultn        | =  | Missing     | TBILL.resultn      | <  | 0.85        |             |         | -0.002867352 | 1845         |      |
| PLT.resultn        | =  | Missing     | TBILL.resultn      | >= | 0.85        |             |         | 0            | 1845         |      |
| PLT.resultn        | <  | 209.5       | ALK.times.uln      | =  | Missing     |             |         | -0.001303072 | 1845         |      |
| PLT.resultn        | <  | 209.5       | ALK.times.uln      | <  | 2.525312974 |             |         | -0.002858153 | 1845         |      |
| PLT.resultn        | <  | 209.5       | ALK.times.uln      | >= | 2.525312974 |             |         | 0.002596194  | 1845         |      |
| PLT.resultn        | >= | 209.5       |                    |    |             |             |         | -0.002268509 | 1845         |      |
| TBILL.resultn      | =  | Missing     |                    |    |             |             | Missing | 0.000298472  | 1846         |      |
| TBILL.resultn      | <  | 4.3         | TBILL.resultn      | =  | Missing     |             | Missing | 0.000289462  | 1846         |      |
| TBILL.resultn      | <  | 4.3         | TBILL.resultn      | <  | 1.65        |             | Missing | 0.000162056  | 1846         |      |
| TBILL.resultn      | <  | 4.3         | TBILL.resultn      | >= | 1.65        | ALB.resultn | =       | Missing      | 0.001264604  | 1846 |
| TBILL.resultn      | <  | 4.3         | TBILL.resultn      | >= | 1.65        | ALB.resultn | <       | 3.75         | 0.002908589  | 1846 |
| TBILL.resultn      | <  | 4.3         | TBILL.resultn      | >= | 1.65        | ALB.resultn | >=      | 3.75         | 0            | 1846 |
| TBILL.resultn      | >= | 4.3         |                    |    |             |             | Missing | -0.000111842 | 1846         |      |
| Sodium.resultn     | =  | Missing     |                    |    |             |             |         | -0.000496865 | 1847         |      |
| Sodium.resultn     | <  | 140.5       | PLT.resultn        | =  | Missing     |             |         | 0.000457343  | 1847         |      |
| Sodium.resultn     | <  | 140.5       | PLT.resultn        | <  | 249.5       |             |         | 0.001200526  | 1847         |      |
| Sodium.resultn     | <  | 140.5       | PLT.resultn        | >= | 249.5       |             |         | 0            | 1847         |      |
| Sodium.resultn     | >= | 140.5       | TBILL.resultn      | =  | Missing     |             |         | -0.000415238 | 1847         |      |
| Sodium.resultn     | >= | 140.5       | TBILL.resultn      | <  | 1.45        |             |         | -0.000375449 | 1847         |      |
| Sodium.resultn     | >= | 140.5       | TBILL.resultn      | >= | 1.45        |             |         | -0.000602247 | 1847         |      |
| TBILL.resultn      | =  | Missing     |                    |    |             |             | Missing | 0.001013339  | 1848         |      |
| TBILL.resultn      | <  | 3.75        | ALK.times.uln      | =  | Missing     | ALB.resultn | =       | Missing      | 0.001045522  | 1848 |
| TBILL.resultn      | <  | 3.75        | ALK.times.uln      | =  | Missing     | ALB.resultn | <       | 3.95         | 0.002423709  | 1848 |
| TBILL.resultn      | <  | 3.75        | ALK.times.uln      | =  | Missing     | ALB.resultn | >=      | 3.95         | 0            | 1848 |
| TBILL.resultn      | <  | 3.75        | ALK.times.uln      | <  | 5.963877551 |             | Missing | 0.000674333  | 1848         |      |
| TBILL.resultn      | <  | 3.75        | ALK.times.uln      | >= | 5.963877551 |             | Missing | 0.00243291   | 1848         |      |
| TBILL.resultn      | >= | 3.75        |                    |    |             |             | Missing | 0.000439389  | 1848         |      |
| Hemoglobin.resultn | =  | Missing     | TBILL.resultn      | =  | Missing     |             |         | 0.000937057  | 1849         |      |
| Hemoglobin.resultn | =  | Missing     | TBILL.resultn      | <  | 1.55        |             |         | 0.000500092  | 1849         |      |
| Hemoglobin.resultn | =  | Missing     | TBILL.resultn      | >= | 1.55        |             |         | 0.002843814  | 1849         |      |
| Hemoglobin.resultn | <  | 13.85       | PLT.resultn        | =  | Missing     |             |         | 0.001200054  | 1849         |      |
| Hemoglobin.resultn | <  | 13.85       | PLT.resultn        | <  | 272         |             |         | 0.002945586  | 1849         |      |
| Hemoglobin.resultn | <  | 13.85       | PLT.resultn        | >= | 272         |             |         | 0            | 1849         |      |
| Hemoglobin.resultn | >= | 13.85       |                    |    |             |             |         | -0.000341816 | 1849         |      |
| ALB.resultn        | =  | Missing     |                    |    |             |             | Missing | -0.00053362  | 1850         |      |
| ALB.resultn        | <  | 3.05        |                    |    |             |             | Missing | 0.000684919  | 1850         |      |
| ALB.resultn        | >= | 3.05        | TBILL.resultn      | =  | Missing     |             | Missing | -0.000401852 | 1850         |      |
| ALB.resultn        | >= | 3.05        | TBILL.resultn      | <  | 0.75        |             | Missing | -0.001067288 | 1850         |      |
| ALB.resultn        | >= | 3.05        | TBILL.resultn      | >= | 0.75        | PLT.resultn | =       | Missing      | 0.000156437  | 1850 |
| ALB.resultn        | >= | 3.05        | TBILL.resultn      | >= | 0.75        | PLT.resultn | <       | 195.5        | 0.000661849  | 1850 |
| ALB.resultn        | >= | 3.05        | TBILL.resultn      | >= | 0.75        | PLT.resultn | >=      | 195.5        | 0            | 1850 |
| ALB.resultn        | =  | Missing     |                    |    |             |             | Missing | 0.000222601  | 1851         |      |
| ALB.resultn        | <  | 2.95        |                    |    |             |             | Missing | 0.001866626  | 1851         |      |
| ALB.resultn        | >= | 2.95        | Hemoglobin.resultn | =  | Missing     | ALB.resultn | =       | Missing      | 0.000492417  | 1851 |
| ALB.resultn        | >= | 2.95        | Hemoglobin.resultn | =  | Missing     | ALB.resultn | <       | 3.95         | 0.002007548  | 1851 |
| ALB.resultn        | >= | 2.95        | Hemoglobin.resultn | =  | Missing     | ALB.resultn | >=      | 3.95         | 0            | 1851 |
| ALB.resultn        | >= | 2.95        | Hemoglobin.resultn | <  | 11.3        |             | Missing | -6.48E-05    | 1851         |      |
| ALB.resultn        | >= | 2.95        | Hemoglobin.resultn | >= | 11.3        |             | Missing | -4.15E-05    | 1851         |      |

|                |    |                            |    |                     |         |             |              |      |
|----------------|----|----------------------------|----|---------------------|---------|-------------|--------------|------|
| ALB.resultn    | =  | Missing                    |    |                     | Missing |             | -0.002477504 | 1852 |
| ALB.resultn    | <  | 2.965                      |    |                     | Missing |             | -0.000328621 | 1852 |
| ALB.resultn    | >= | 2.965 PLT.resultn          | =  | Missing             | Missing |             | -0.00071913  | 1852 |
| ALB.resultn    | >= | 2.965 PLT.resultn          | <  | 206.5 TBILL.resultn | =       | Missing     | -0.001717088 | 1852 |
| ALB.resultn    | >= | 2.965 PLT.resultn          | <  | 206.5 TBILL.resultn | <       | 1.3         | -0.002463649 | 1852 |
| ALB.resultn    | >= | 2.965 PLT.resultn          | <  | 206.5 TBILL.resultn | >=      | 1.3         | 0            | 1852 |
| ALB.resultn    | >= | 2.965 PLT.resultn          | >= | 206.5               | Missing |             | -0.002048724 | 1852 |
| ALK.times.uln  | =  | Missing TBILL.resultn      | =  | Missing             |         |             | 0            | 1853 |
| ALK.times.uln  | =  | Missing TBILL.resultn      | <  | 1.15                |         |             | -2.37E-06    | 1853 |
| ALK.times.uln  | =  | Missing TBILL.resultn      | >= | 1.15                |         |             | 0.002426971  | 1853 |
| ALK.times.uln  | <  | 7.794978567 TBILL.resultn  | =  | Missing             |         |             | 0.000802526  | 1853 |
| ALK.times.uln  | <  | 7.794978567 TBILL.resultn  | <  | 2.05                |         |             | 0.000662917  | 1853 |
| ALK.times.uln  | <  | 7.794978567 TBILL.resultn  | >= | 2.05                |         |             | 0.001912422  | 1853 |
| ALK.times.uln  | >= | 7.794978567                |    |                     |         |             | 0.000377346  | 1853 |
| ALB.resultn    | =  | Missing                    |    |                     | Missing |             | 0.001684941  | 1854 |
| ALB.resultn    | <  | 3.03                       |    |                     | Missing |             | 0.001908737  | 1854 |
| ALB.resultn    | >= | 3.03 PLT.resultn           | =  | Missing             | Missing |             | -0.000475285 | 1854 |
| ALB.resultn    | >= | 3.03 PLT.resultn           | <  | 185.5               | Missing |             | 0.001269299  | 1854 |
| ALB.resultn    | >= | 3.03 PLT.resultn           | >= | 185.5 TBILL.resultn | =       | Missing     | 0.000128662  | 1854 |
| ALB.resultn    | >= | 3.03 PLT.resultn           | >= | 185.5 TBILL.resultn | <       | 1.95        | 0.000136795  | 1854 |
| ALB.resultn    | >= | 3.03 PLT.resultn           | >= | 185.5 TBILL.resultn | >=      | 1.95        | 0            | 1854 |
| AST.resultn    | =  | Missing                    |    |                     | Missing |             | -0.003118951 | 1855 |
| AST.resultn    | <  | 123.5 AST.resultn          | =  | Missing             | Missing |             | -0.002159051 | 1855 |
| AST.resultn    | <  | 123.5 AST.resultn          | <  | 52.5                | Missing |             | -0.002882975 | 1855 |
| AST.resultn    | <  | 123.5 AST.resultn          | >= | 52.5 age.yrs        | =       | Missing     | -0.001390805 | 1855 |
| AST.resultn    | <  | 123.5 AST.resultn          | >= | 52.5 age.yrs        | <       | 51.63175907 | -0.002034311 | 1855 |
| AST.resultn    | <  | 123.5 AST.resultn          | >= | 52.5 age.yrs        | >=      | 51.63175907 | 0            | 1855 |
| AST.resultn    | >= | 123.5                      |    |                     | Missing |             | -0.002795522 | 1855 |
| age.yrs        | =  | Missing                    |    |                     | Missing |             | 0.000781515  | 1856 |
| age.yrs        | <  | 69.84257358 Sodium.resultn | =  | Missing             | Missing |             | 0.000611041  | 1856 |
| age.yrs        | <  | 69.84257358 Sodium.resultn | <  | 136.5               | Missing |             | 0.001454603  | 1856 |
| age.yrs        | <  | 69.84257358 Sodium.resultn | >= | 136.5 TBILL.resultn | =       | Missing     | 0.000518526  | 1856 |
| age.yrs        | <  | 69.84257358 Sodium.resultn | >= | 136.5 TBILL.resultn | <       | 1.25        | 0.000700277  | 1856 |
| age.yrs        | <  | 69.84257358 Sodium.resultn | >= | 136.5 TBILL.resultn | >=      | 1.25        | 0            | 1856 |
| age.yrs        | >= | 69.84257358                |    |                     | Missing |             | 0.003864354  | 1856 |
| Sodium.resultn | =  | Missing                    |    |                     |         |             | -0.000313354 | 1857 |
| Sodium.resultn | <  | 138.5 ALK.times.uln        | =  | Missing             |         |             | 0.000477114  | 1857 |
| Sodium.resultn | <  | 138.5 ALK.times.uln        | <  | 2.823748484         |         |             | 0.001102188  | 1857 |
| Sodium.resultn | <  | 138.5 ALK.times.uln        | >= | 2.823748484         |         |             | 0.002273026  | 1857 |
| Sodium.resultn | >= | 138.5 PLT.resultn          | =  | Missing             |         |             | 0.000220238  | 1857 |
| Sodium.resultn | >= | 138.5 PLT.resultn          | <  | 191.5               |         |             | 0.002312501  | 1857 |
| Sodium.resultn | >= | 138.5 PLT.resultn          | >= | 191.5               |         |             | 0            | 1857 |
| age.yrs        | =  | Missing                    |    |                     | Missing |             | 0.000811236  | 1858 |
| age.yrs        | <  | 69.71800137 PLT.resultn    | =  | Missing             | Missing |             | -0.000162291 | 1858 |
| age.yrs        | <  | 69.71800137 PLT.resultn    | <  | 198.5 ALB.resultn   | =       | Missing     | 0.001627167  | 1858 |
| age.yrs        | <  | 69.71800137 PLT.resultn    | <  | 198.5 ALB.resultn   | <       | 4.35        | 0.003138107  | 1858 |
| age.yrs        | <  | 69.71800137 PLT.resultn    | <  | 198.5 ALB.resultn   | >=      | 4.35        | 0            | 1858 |
| age.yrs        | <  | 69.71800137 PLT.resultn    | >= | 198.5               | Missing |             | 0.000638982  | 1858 |
| age.yrs        | >= | 69.71800137                |    |                     | Missing |             | 0.00368666   | 1858 |
| age.yrs        | =  | Missing                    |    |                     | Missing |             | -0.001959937 | 1859 |
| age.yrs        | <  | 69.71800137 PLT.resultn    | =  | Missing             | Missing |             | -0.001546924 | 1859 |
| age.yrs        | <  | 69.71800137 PLT.resultn    | <  | 198.5 TBILL.resultn | =       | Missing     | -0.001316208 | 1859 |
| age.yrs        | <  | 69.71800137 PLT.resultn    | <  | 198.5 TBILL.resultn | <       | 0.85        | -0.002726432 | 1859 |
| age.yrs        | <  | 69.71800137 PLT.resultn    | <  | 198.5 TBILL.resultn | >=      | 0.85        | 0            | 1859 |
| age.yrs        | <  | 69.71800137 PLT.resultn    | >= | 198.5               | Missing |             | -0.002277911 | 1859 |
| age.yrs        | >= | 69.71800137                |    |                     | Missing |             | 0.000889838  | 1859 |
| Sodium.resultn | =  | Missing                    |    |                     | Missing |             | -0.000627086 | 1860 |
| Sodium.resultn | <  | 136.5                      |    |                     | Missing |             | 0.000529587  | 1860 |
| Sodium.resultn | >= | 136.5 ALB.resultn          | =  | Missing             | Missing |             | -0.00053368  | 1860 |
| Sodium.resultn | >= | 136.5 ALB.resultn          | <  | 3.45                | Missing |             | -0.000935712 | 1860 |
| Sodium.resultn | >= | 136.5 ALB.resultn          | >= | 3.45 ALK.times.uln  | =       | Missing     | 0            | 1860 |
| Sodium.resultn | >= | 136.5 ALB.resultn          | >= | 3.45 ALK.times.uln  | <       | 2.85059761  | -0.00144761  | 1860 |

|                |    |             |                |    |             |               |    |            |              |      |
|----------------|----|-------------|----------------|----|-------------|---------------|----|------------|--------------|------|
| Sodium.resultn | >= | 136.5       | ALB.resultn    | >= | 3.45        | ALK.times.uln | >= | 2.85059761 | 0.001597556  | 1860 |
| ALB.resultn    | =  | Missing     |                |    |             |               |    | Missing    | -0.000604284 | 1861 |
| ALB.resultn    | <  | 2.965       |                |    |             |               |    | Missing    | 0.000495243  | 1861 |
| ALB.resultn    | >= | 2.965       | TBILL.resultn  | =  | Missing     |               |    | Missing    | -0.00082371  | 1861 |
| ALB.resultn    | >= | 2.965       | TBILL.resultn  | <  | 2.65        | TBILL.resultn | =  | Missing    | -0.000803821 | 1861 |
| ALB.resultn    | >= | 2.965       | TBILL.resultn  | <  | 2.65        | TBILL.resultn | <  | 0.75       | -0.001623718 | 1861 |
| ALB.resultn    | >= | 2.965       | TBILL.resultn  | <  | 2.65        | TBILL.resultn | >= | 0.75       | 0            | 1861 |
| ALB.resultn    | >= | 2.965       | TBILL.resultn  | >= | 2.65        |               |    | Missing    | -0.001091557 | 1861 |
| psc.yrs.dur    | =  | Missing     |                |    |             |               |    | Missing    | -0.001779529 | 1862 |
| psc.yrs.dur    | <  | 2.05065024  |                |    |             |               |    | Missing    | -0.002105144 | 1862 |
| psc.yrs.dur    | >= | 2.05065024  | Sodium.resultn | =  | Missing     |               |    | Missing    | -0.001313739 | 1862 |
| psc.yrs.dur    | >= | 2.05065024  | Sodium.resultn | <  | 140.5       | ALB.resultn   | =  | Missing    | 0.000543769  | 1862 |
| psc.yrs.dur    | >= | 2.05065024  | Sodium.resultn | <  | 140.5       | ALB.resultn   | <  | 3.81       | 0.001196292  | 1862 |
| psc.yrs.dur    | >= | 2.05065024  | Sodium.resultn | <  | 140.5       | ALB.resultn   | >= | 3.81       | 0            | 1862 |
| psc.yrs.dur    | >= | 2.05065024  | Sodium.resultn | >= | 140.5       |               |    | Missing    | -0.00207308  | 1862 |
| Sodium.resultn | =  | Missing     |                |    |             |               |    |            | 0.000881977  | 1863 |
| Sodium.resultn | <  | 138.5       | ALK.times.uln  | =  | Missing     |               |    |            | 0.00121897   | 1863 |
| Sodium.resultn | <  | 138.5       | ALK.times.uln  | <  | 2.795652174 |               |    |            | 0.001425833  | 1863 |
| Sodium.resultn | <  | 138.5       | ALK.times.uln  | >= | 2.795652174 |               |    |            | 0.003183315  | 1863 |
| Sodium.resultn | >= | 138.5       | ALB.resultn    | =  | Missing     |               |    |            | 6.59E-05     | 1863 |
| Sodium.resultn | >= | 138.5       | ALB.resultn    | <  | 3.13        |               |    |            | 0.000718212  | 1863 |
| Sodium.resultn | >= | 138.5       | ALB.resultn    | >= | 3.13        |               |    |            | 0            | 1863 |
| age.yrs        | =  | Missing     |                |    |             |               |    | Missing    | -0.00073285  | 1864 |
| age.yrs        | <  | 69.43052704 | AST.resultn    | =  | Missing     |               |    | Missing    | -0.001575696 | 1864 |
| age.yrs        | <  | 69.43052704 | AST.resultn    | <  | 141.5       | TBILL.resultn | =  | Missing    | -0.000790108 | 1864 |
| age.yrs        | <  | 69.43052704 | AST.resultn    | <  | 141.5       | TBILL.resultn | <  | 0.75       | -0.001564413 | 1864 |
| age.yrs        | <  | 69.43052704 | AST.resultn    | <  | 141.5       | TBILL.resultn | >= | 0.75       | 0            | 1864 |
| age.yrs        | <  | 69.43052704 | AST.resultn    | >= | 141.5       |               |    | Missing    | -0.001150163 | 1864 |
| age.yrs        | >= | 69.43052704 |                |    |             |               |    | Missing    | 0.002529979  | 1864 |
| age.yrs        | =  | Missing     |                |    |             |               |    |            | -0.000259216 | 1865 |
| age.yrs        | <  | 63.16084873 | TBILL.resultn  | =  | Missing     |               |    |            | 0            | 1865 |
| age.yrs        | <  | 63.16084873 | TBILL.resultn  | <  | 2.6         |               |    |            | -0.000363397 | 1865 |
| age.yrs        | <  | 63.16084873 | TBILL.resultn  | >= | 2.6         |               |    |            | -0.000721683 | 1865 |
| age.yrs        | >= | 63.16084873 | ALB.resultn    | =  | Missing     |               |    |            | 0.000720682  | 1865 |
| age.yrs        | >= | 63.16084873 | ALB.resultn    | <  | 3.95        |               |    |            | 0.002418072  | 1865 |
| age.yrs        | >= | 63.16084873 | ALB.resultn    | >= | 3.95        |               |    |            | -0.001285324 | 1865 |
| age.yrs        | =  | Missing     |                |    |             |               |    | Missing    | 0.000761281  | 1866 |
| age.yrs        | <  | 54.36824093 |                |    |             |               |    | Missing    | 0.000563657  | 1866 |
| age.yrs        | >= | 54.36824093 | psc.yrs.dur    | =  | Missing     |               |    | Missing    | 0.001400265  | 1866 |
| age.yrs        | >= | 54.36824093 | psc.yrs.dur    | <  | 6.324435318 | ALB.resultn   | =  | Missing    | 0.00063205   | 1866 |
| age.yrs        | >= | 54.36824093 | psc.yrs.dur    | <  | 6.324435318 | ALB.resultn   | <  | 3.805      | 0.001563491  | 1866 |
| age.yrs        | >= | 54.36824093 | psc.yrs.dur    | <  | 6.324435318 | ALB.resultn   | >= | 3.805      | 0            | 1866 |
| age.yrs        | >= | 54.36824093 | psc.yrs.dur    | >= | 6.324435318 |               |    | Missing    | 0.004822318  | 1866 |
| age.yrs        | =  | Missing     |                |    |             |               |    | Missing    | -0.000570541 | 1867 |
| age.yrs        | <  | 54.39972621 |                |    |             |               |    | Missing    | -0.000848011 | 1867 |
| age.yrs        | >= | 54.39972621 | AST.resultn    | =  | Missing     |               |    | Missing    | 0.000457122  | 1867 |
| age.yrs        | >= | 54.39972621 | AST.resultn    | <  | 50.5        |               |    | Missing    | -0.001459595 | 1867 |
| age.yrs        | >= | 54.39972621 | AST.resultn    | >= | 50.5        | AST.resultn   | =  | Missing    | 0.002373839  | 1867 |
| age.yrs        | >= | 54.39972621 | AST.resultn    | >= | 50.5        | AST.resultn   | <  | 72         | 0.003857489  | 1867 |
| age.yrs        | >= | 54.39972621 | AST.resultn    | >= | 50.5        | AST.resultn   | >= | 72         | 0            | 1867 |
| age.yrs        | =  | Missing     |                |    |             |               |    | Missing    | -0.000586332 | 1868 |
| age.yrs        | <  | 54.30527036 |                |    |             |               |    | Missing    | -0.000833412 | 1868 |
| age.yrs        | >= | 54.30527036 | AST.resultn    | =  | Missing     |               |    | Missing    | 0.000132102  | 1868 |
| age.yrs        | >= | 54.30527036 | AST.resultn    | <  | 51.5        |               |    | Missing    | -0.001315415 | 1868 |
| age.yrs        | >= | 54.30527036 | AST.resultn    | >= | 51.5        | AST.resultn   | =  | Missing    | 0.001579619  | 1868 |
| age.yrs        | >= | 54.30527036 | AST.resultn    | >= | 51.5        | AST.resultn   | <  | 67         | 0.004595255  | 1868 |
| age.yrs        | >= | 54.30527036 | AST.resultn    | >= | 51.5        | AST.resultn   | >= | 67         | 0            | 1868 |
| PLT.resultn    | =  | Missing     |                |    |             |               |    | Missing    | -0.001429795 | 1869 |
| PLT.resultn    | <  | 169.5       |                |    |             |               |    | Missing    | 0.001379396  | 1869 |
| PLT.resultn    | >= | 169.5       | Sodium.resultn | =  | Missing     |               |    | Missing    | -0.001540696 | 1869 |
| PLT.resultn    | >= | 169.5       | Sodium.resultn | <  | 141.5       | TBILL.resultn | =  | Missing    | -0.001013039 | 1869 |
| PLT.resultn    | >= | 169.5       | Sodium.resultn | <  | 141.5       | TBILL.resultn | <  | 0.85       | -0.002008305 | 1869 |

|               |    |                            |    |                          |         |             |              |      |
|---------------|----|----------------------------|----|--------------------------|---------|-------------|--------------|------|
| PLT.resultn   | >= | 169.5 Sodium.resultn       | <  | 141.5 TBILI.resultn      | >=      | 0.85        | 0            | 1869 |
| PLT.resultn   | >= | 169.5 Sodium.resultn       | >= | 141.5                    | Missing |             | -0.001555458 | 1869 |
| psc.yrs.dur   | =  | Missing                    |    |                          |         |             | -0.001405359 | 1870 |
| psc.yrs.dur   | <  | 6.410677618 TBILI.resultn  | =  | Missing                  |         |             | 0            | 1870 |
| psc.yrs.dur   | <  | 6.410677618 TBILI.resultn  | <  | 3.05                     |         |             | -0.00164069  | 1870 |
| psc.yrs.dur   | <  | 6.410677618 TBILI.resultn  | >= | 3.05                     |         |             | -0.001938042 | 1870 |
| psc.yrs.dur   | >= | 6.410677618 AST.resultn    | =  | Missing                  |         |             | -0.000210509 | 1870 |
| psc.yrs.dur   | >= | 6.410677618 AST.resultn    | <  | 42                       |         |             | -0.002370768 | 1870 |
| psc.yrs.dur   | >= | 6.410677618 AST.resultn    | >= | 42                       |         |             | 0.001229664  | 1870 |
| psc.yrs.dur   | =  | Missing                    |    |                          |         |             | -0.000269284 | 1871 |
| psc.yrs.dur   | <  | 2.05065024 TBILI.resultn   | =  | Missing                  |         |             | 0            | 1871 |
| psc.yrs.dur   | <  | 2.05065024 TBILI.resultn   | <  | 2.8                      |         |             | -0.000388946 | 1871 |
| psc.yrs.dur   | <  | 2.05065024 TBILI.resultn   | >= | 2.8                      |         |             | -0.000765485 | 1871 |
| psc.yrs.dur   | >= | 2.05065024 AST.resultn     | =  | Missing                  |         |             | 3.70E-05     | 1871 |
| psc.yrs.dur   | >= | 2.05065024 AST.resultn     | <  | 86.5                     |         |             | -0.000420262 | 1871 |
| psc.yrs.dur   | >= | 2.05065024 AST.resultn     | >= | 86.5                     |         |             | 0.001382056  | 1871 |
| PLT.resultn   | =  | Missing                    |    |                          | Missing |             | -0.003871634 | 1872 |
| PLT.resultn   | <  | 209.5 TBILI.resultn        | =  | Missing                  | Missing |             | -0.002975529 | 1872 |
| PLT.resultn   | <  | 209.5 TBILI.resultn        | <  | 1.65 ALK.times.uln       | =       | Missing     | -0.003309789 | 1872 |
| PLT.resultn   | <  | 209.5 TBILI.resultn        | <  | 1.65 ALK.times.uln       | <       | 1.675707398 | -0.005051783 | 1872 |
| PLT.resultn   | <  | 209.5 TBILI.resultn        | <  | 1.65 ALK.times.uln       | >=      | 1.675707398 | 0            | 1872 |
| PLT.resultn   | <  | 209.5 TBILI.resultn        | >= | 1.65                     | Missing |             | -0.001839046 | 1872 |
| PLT.resultn   | >= | 209.5                      |    |                          | Missing |             | -0.004566119 | 1872 |
| ALB.resultn   | =  | Missing                    |    |                          | Missing |             | -0.002010214 | 1873 |
| ALB.resultn   | <  | 3.105                      |    |                          | Missing |             | -0.000700083 | 1873 |
| ALB.resultn   | >= | 3.105 Hemoglobin.resultn   | =  | Missing TBILI.resultn    | =       | Missing     | -0.001628802 | 1873 |
| ALB.resultn   | >= | 3.105 Hemoglobin.resultn   | =  | Missing TBILI.resultn    | <       | 1.25        | -0.002069018 | 1873 |
| ALB.resultn   | >= | 3.105 Hemoglobin.resultn   | =  | Missing TBILI.resultn    | >=      | 1.25        | 0            | 1873 |
| ALB.resultn   | >= | 3.105 Hemoglobin.resultn   | <  | 15.35                    | Missing |             | -0.00216651  | 1873 |
| ALB.resultn   | >= | 3.105 Hemoglobin.resultn   | >= | 15.35                    | Missing |             | -2.90E-05    | 1873 |
| ALB.resultn   | =  | Missing                    |    |                          | Missing |             | -0.002117462 | 1874 |
| ALB.resultn   | <  | 2.915                      |    |                          | Missing |             | -0.000258386 | 1874 |
| ALB.resultn   | >= | 2.915 TBILI.resultn        | =  | Missing                  | Missing |             | -0.001537042 | 1874 |
| ALB.resultn   | >= | 2.915 TBILI.resultn        | <  | 0.75                     | Missing |             | -0.002140953 | 1874 |
| ALB.resultn   | >= | 2.915 TBILI.resultn        | >= | 0.75 psc.yrs.dur         | =       | Missing     | -0.001034628 | 1874 |
| ALB.resultn   | >= | 2.915 TBILI.resultn        | >= | 0.75 psc.yrs.dur         | <       | 6.324435318 | -0.001256334 | 1874 |
| ALB.resultn   | >= | 2.915 TBILI.resultn        | >= | 0.75 psc.yrs.dur         | >=      | 6.324435318 | 0            | 1874 |
| ALK.times.uln | =  | Missing TBILI.resultn      | =  | Missing                  | Missing |             | -0.002534671 | 1875 |
| ALK.times.uln | =  | Missing TBILI.resultn      | <  | 1.55 TBILI.resultn       | =       | Missing     | -0.00191118  | 1875 |
| ALK.times.uln | =  | Missing TBILI.resultn      | <  | 1.55 TBILI.resultn       | <       | 0.95        | -0.002615299 | 1875 |
| ALK.times.uln | =  | Missing TBILI.resultn      | <  | 1.55 TBILI.resultn       | >=      | 0.95        | 0            | 1875 |
| ALK.times.uln | =  | Missing TBILI.resultn      | >= | 1.55                     | Missing |             | 1.52E-05     | 1875 |
| ALK.times.uln | <  | 5.963877551                |    |                          | Missing |             | -0.002257296 | 1875 |
| ALK.times.uln | >= | 5.963877551                |    |                          | Missing |             | -8.00E-05    | 1875 |
| TBILI.resultn | =  | Missing                    |    |                          | Missing |             | 0.003720189  | 1876 |
| TBILI.resultn | <  | 1.65                       |    |                          | Missing |             | 0.000477615  | 1876 |
| TBILI.resultn | >= | 1.65 PLT.resultn           | =  | Missing                  | Missing |             | 0.000726656  | 1876 |
| TBILI.resultn | >= | 1.65 PLT.resultn           | <  | 212.5                    | Missing |             | 0.002308365  | 1876 |
| TBILI.resultn | >= | 1.65 PLT.resultn           | >= | 212.5 Hemoglobin.resultn | =       | Missing     | 3.07E-05     | 1876 |
| TBILI.resultn | >= | 1.65 PLT.resultn           | >= | 212.5 Hemoglobin.resultn | <       | 12.9        | 7.37E-05     | 1876 |
| TBILI.resultn | >= | 1.65 PLT.resultn           | >= | 212.5 Hemoglobin.resultn | >=      | 12.9        | 0            | 1876 |
| ALB.resultn   | =  | Missing                    |    |                          | Missing |             | 0.000348827  | 1877 |
| ALB.resultn   | <  | 2.915                      |    |                          | Missing |             | 0.001480603  | 1877 |
| ALB.resultn   | >= | 2.915 TBILI.resultn        | =  | Missing                  | Missing |             | -0.000644042 | 1877 |
| ALB.resultn   | >= | 2.915 TBILI.resultn        | <  | 3.15 ALK.times.uln       | =       | Missing     | 0            | 1877 |
| ALB.resultn   | >= | 2.915 TBILI.resultn        | <  | 3.15 ALK.times.uln       | <       | 5.406407841 | -0.000943565 | 1877 |
| ALB.resultn   | >= | 2.915 TBILI.resultn        | <  | 3.15 ALK.times.uln       | >=      | 5.406407841 | 0.000792441  | 1877 |
| ALB.resultn   | >= | 2.915 TBILI.resultn        | >= | 3.15                     | Missing |             | -0.000738282 | 1877 |
| ALK.times.uln | =  | Missing TBILI.resultn      | =  | Missing                  |         |             | -0.000434539 | 1878 |
| ALK.times.uln | =  | Missing TBILI.resultn      | <  | 1.15                     |         |             | -0.000507091 | 1878 |
| ALK.times.uln | =  | Missing TBILI.resultn      | >= | 1.15                     |         |             | 0.001708786  | 1878 |
| ALK.times.uln | <  | 5.406701831 Sodium.resultn | =  | Missing                  |         |             | 0            | 1878 |

|               |    |                            |    |                           |         |              |              |      |
|---------------|----|----------------------------|----|---------------------------|---------|--------------|--------------|------|
| ALK.times.uln | <  | 5.406701831 Sodium.resultn | <  | 137.5                     |         | 0.003300572  | 1878         |      |
| ALK.times.uln | <  | 5.406701831 Sodium.resultn | >= | 137.5                     |         | 0.000244027  | 1878         |      |
| ALK.times.uln | >= | 5.406701831                |    |                           |         | -5.41E-05    | 1878         |      |
| AST.resultn   | =  | Missing                    |    |                           | Missing | -0.000307336 | 1879         |      |
| AST.resultn   | <  | 99.5                       |    |                           | Missing | 0.000148736  | 1879         |      |
| AST.resultn   | >= | 99.5 psc.yrs.dur           | =  | Missing                   | Missing | 0.001066945  | 1879         |      |
| AST.resultn   | >= | 99.5 psc.yrs.dur           | <  | 2.310746064 AST.resultn   | =       | Missing      | 0.000500946  | 1879 |
| AST.resultn   | >= | 99.5 psc.yrs.dur           | <  | 2.310746064 AST.resultn   | <       | 121.5        | 0.001912704  | 1879 |
| AST.resultn   | >= | 99.5 psc.yrs.dur           | <  | 2.310746064 AST.resultn   | >=      | 121.5        | 0            | 1879 |
| AST.resultn   | >= | 99.5 psc.yrs.dur           | >= | 2.310746064               | Missing | 0.00255269   | 1879         |      |
| age.yrs       | =  | Missing                    |    |                           |         | -0.000480747 | 1880         |      |
| age.yrs       | <  | 62.47091034 PLT.resultn    | =  | Missing                   |         | 0            | 1880         |      |
| age.yrs       | <  | 62.47091034 PLT.resultn    | <  | 170                       |         | 0.000888522  | 1880         |      |
| age.yrs       | <  | 62.47091034 PLT.resultn    | >= | 170                       |         | -0.000787635 | 1880         |      |
| age.yrs       | >= | 62.47091034 AST.resultn    | =  | Missing                   |         | 0.000931224  | 1880         |      |
| age.yrs       | >= | 62.47091034 AST.resultn    | <  | 49                        |         | -0.001458587 | 1880         |      |
| age.yrs       | >= | 62.47091034 AST.resultn    | >= | 49                        |         | 0.00276954   | 1880         |      |
| ALK.times.uln | =  | Missing ALB.resultn        | =  | Missing                   | Missing | -0.001924057 | 1881         |      |
| ALK.times.uln | =  | Missing ALB.resultn        | <  | 3.95 age.yrs              | =       | Missing      | -0.000945795 | 1881 |
| ALK.times.uln | =  | Missing ALB.resultn        | <  | 3.95 age.yrs              | <       | 51.93566051  | -0.001891591 | 1881 |
| ALK.times.uln | =  | Missing ALB.resultn        | <  | 3.95 age.yrs              | >=      | 51.93566051  | 0            | 1881 |
| ALK.times.uln | =  | Missing ALB.resultn        | >= | 3.95                      | Missing | -0.00186333  | 1881         |      |
| ALK.times.uln | <  | 5.859702093                |    |                           | Missing | -0.001346405 | 1881         |      |
| ALK.times.uln | >= | 5.859702093                |    |                           | Missing | -0.000185756 | 1881         |      |
| ALB.resultn   | =  | Missing                    |    |                           |         | 6.23E-05     | 1882         |      |
| ALB.resultn   | <  | 3.31 psc.yrs.dur           | =  | Missing                   |         | 0.001663338  | 1882         |      |
| ALB.resultn   | <  | 3.31 psc.yrs.dur           | <  | 2.205338809               |         | 0.000607735  | 1882         |      |
| ALB.resultn   | <  | 3.31 psc.yrs.dur           | >= | 2.205338809               |         | 0.002814904  | 1882         |      |
| ALB.resultn   | >= | 3.31 TBILL.resultn         | =  | Missing                   |         | 0.000106178  | 1882         |      |
| ALB.resultn   | >= | 3.31 TBILL.resultn         | <  | 2.55                      |         | 0.000112391  | 1882         |      |
| ALB.resultn   | >= | 3.31 TBILL.resultn         | >= | 2.55                      |         | 0            | 1882         |      |
| AST.resultn   | =  | Missing                    |    |                           | Missing | -0.002183727 | 1883         |      |
| AST.resultn   | <  | 213.5 AST.resultn          | =  | Missing                   | Missing | -0.002289867 | 1883         |      |
| AST.resultn   | <  | 213.5 AST.resultn          | <  | 126.5 AST.resultn         | =       | Missing      | -0.002249113 | 1883 |
| AST.resultn   | <  | 213.5 AST.resultn          | <  | 126.5 AST.resultn         | <       | 107.5        | -0.002386814 | 1883 |
| AST.resultn   | <  | 213.5 AST.resultn          | <  | 126.5 AST.resultn         | >=      | 107.5        | 0            | 1883 |
| AST.resultn   | <  | 213.5 AST.resultn          | >= | 126.5                     | Missing | -0.00264307  | 1883         |      |
| AST.resultn   | >= | 213.5                      |    |                           | Missing | -0.000289541 | 1883         |      |
| psc.yrs.dur   | =  | Missing                    |    |                           | Missing | 0.000469441  | 1884         |      |
| psc.yrs.dur   | <  | 13.31416838 ALB.resultn    | =  | Missing                   | Missing | 0.000519807  | 1884         |      |
| psc.yrs.dur   | <  | 13.31416838 ALB.resultn    | <  | 3.05                      | Missing | 0.001572146  | 1884         |      |
| psc.yrs.dur   | <  | 13.31416838 ALB.resultn    | >= | 3.05 TBILL.resultn        | =       | Missing      | 0.000279106  | 1884 |
| psc.yrs.dur   | <  | 13.31416838 ALB.resultn    | >= | 3.05 TBILL.resultn        | <       | 2.6          | 0.000301258  | 1884 |
| psc.yrs.dur   | <  | 13.31416838 ALB.resultn    | >= | 3.05 TBILL.resultn        | >=      | 2.6          | 0            | 1884 |
| psc.yrs.dur   | >= | 13.31416838                |    |                           | Missing | 0.003122534  | 1884         |      |
| ALB.resultn   | =  | Missing                    |    |                           | Missing | 0.00085558   | 1885         |      |
| ALB.resultn   | <  | 2.915                      |    |                           | Missing | 0.001828061  | 1885         |      |
| ALB.resultn   | >= | 2.915 Hemoglobin.resultn   | =  | Missing ALB.resultn       | =       | Missing      | 0.000625826  | 1885 |
| ALB.resultn   | >= | 2.915 Hemoglobin.resultn   | =  | Missing ALB.resultn       | <       | 3.95         | 0.002555457  | 1885 |
| ALB.resultn   | >= | 2.915 Hemoglobin.resultn   | =  | Missing ALB.resultn       | >=      | 3.95         | 0            | 1885 |
| ALB.resultn   | >= | 2.915 Hemoglobin.resultn   | <  | 15.35                     | Missing | 0.00023666   | 1885         |      |
| ALB.resultn   | >= | 2.915 Hemoglobin.resultn   | >= | 15.35                     | Missing | 0.001887119  | 1885         |      |
| ALK.times.uln | =  | Missing psc.yrs.dur        | =  | Missing                   | Missing | -0.001691577 | 1886         |      |
| ALK.times.uln | =  | Missing psc.yrs.dur        | <  | 0.839151266               | Missing | -0.002362119 | 1886         |      |
| ALK.times.uln | =  | Missing psc.yrs.dur        | >= | 0.839151266 TBILL.resultn | =       | Missing      | -0.001021034 | 1886 |
| ALK.times.uln | =  | Missing psc.yrs.dur        | >= | 0.839151266 TBILL.resultn | <       | 1.15         | -0.001588275 | 1886 |
| ALK.times.uln | =  | Missing psc.yrs.dur        | >= | 0.839151266 TBILL.resultn | >=      | 1.15         | 0            | 1886 |
| ALK.times.uln | <  | 7.216643422                |    |                           | Missing | -0.001981038 | 1886         |      |
| ALK.times.uln | >= | 7.216643422                |    |                           | Missing | -0.000254752 | 1886         |      |
| psc.yrs.dur   | =  | Missing                    |    |                           |         | -0.001840065 | 1887         |      |
| psc.yrs.dur   | <  | 6.592744695 age.yrs        | =  | Missing                   |         | -0.001960651 | 1887         |      |
| psc.yrs.dur   | <  | 6.592744695 age.yrs        | <  | 69.70978782               |         | -0.002104114 | 1887         |      |

|               |    |                                |    |                     |               |             |         |              |      |
|---------------|----|--------------------------------|----|---------------------|---------------|-------------|---------|--------------|------|
| psc.yrs.dur   | <  | 6.592744695 age.yrs            | >= | 69.70978782         |               |             |         | 0            | 1887 |
| psc.yrs.dur   | >= | 6.592744695 ALK.times.uln      | =  | Missing             |               |             |         | -0.001374458 | 1887 |
| psc.yrs.dur   | >= | 6.592744695 ALK.times.uln      | <  | 2.815208295         |               |             |         | -0.001086753 | 1887 |
| psc.yrs.dur   | >= | 6.592744695 ALK.times.uln      | >= | 2.815208295         |               |             |         | -0.000592326 | 1887 |
| TBILL.resultn | =  | Missing                        |    |                     |               |             |         | -0.001137867 | 1888 |
| TBILL.resultn | <  | 1.95 AST.resultn               | =  | Missing             |               |             |         | -0.000575667 | 1888 |
| TBILL.resultn | <  | 1.95 AST.resultn               | <  | 47.5                |               |             |         | -0.001151334 | 1888 |
| TBILL.resultn | <  | 1.95 AST.resultn               | >= | 47.5                |               |             |         | 0            | 1888 |
| TBILL.resultn | >= | 1.95 ALB.resultn               | =  | Missing             |               |             |         | 0.000648133  | 1888 |
| TBILL.resultn | >= | 1.95 ALB.resultn               | <  | 3.755               |               |             |         | 0.001334181  | 1888 |
| TBILL.resultn | >= | 1.95 ALB.resultn               | >= | 3.755               |               |             |         | 7.64E-05     | 1888 |
| ALB.resultn   | =  | Missing                        |    |                     |               |             | Missing | -0.001238069 | 1889 |
| ALB.resultn   | <  | 2.95                           |    |                     |               |             | Missing | 0.000104935  | 1889 |
| ALB.resultn   | >= | 2.95 TBILL.resultn             | =  | Missing             |               |             | Missing | -0.000982348 | 1889 |
| ALB.resultn   | >= | 2.95 TBILL.resultn             | <  | 2.85 TBILL.resultn  | =             | Missing     |         | -0.000955974 | 1889 |
| ALB.resultn   | >= | 2.95 TBILL.resultn             | <  | 2.85 TBILL.resultn  | <             | 0.85        |         | -0.001588151 | 1889 |
| ALB.resultn   | >= | 2.95 TBILL.resultn             | <  | 2.85 TBILL.resultn  | >=            | 0.85        |         | 0            | 1889 |
| ALB.resultn   | >= | 2.95 TBILL.resultn             | >= | 2.85                |               |             | Missing | -0.001525637 | 1889 |
| AST.resultn   | =  | Missing                        |    |                     |               |             | Missing | -0.001401197 | 1890 |
| AST.resultn   | <  | 213.5 TBILL.resultn            | =  | Missing             |               |             | Missing | 0.000853272  | 1890 |
| AST.resultn   | <  | 213.5 TBILL.resultn            | <  | 2.6 AST.resultn     | =             | Missing     |         | -0.000757983 | 1890 |
| AST.resultn   | <  | 213.5 TBILL.resultn            | <  | 2.6 AST.resultn     | <             | 56.5        |         | -0.001388518 | 1890 |
| AST.resultn   | <  | 213.5 TBILL.resultn            | <  | 2.6 AST.resultn     | >=            | 56.5        |         | 0            | 1890 |
| AST.resultn   | <  | 213.5 TBILL.resultn            | >= | 2.6                 |               |             | Missing | -0.000887098 | 1890 |
| AST.resultn   | >= | 213.5                          |    |                     |               |             | Missing | 0.001367978  | 1890 |
| age.yrs       | =  | Missing                        |    |                     |               |             | Missing | 0.000861801  | 1891 |
| age.yrs       | <  | 69.84257358 Hemoglobin.resultn | =  | Missing             | ALB.resultn   | =           | Missing | 0            | 1891 |
| age.yrs       | <  | 69.84257358 Hemoglobin.resultn | =  | Missing             | ALB.resultn   | <           | 3.95    | 0.002408671  | 1891 |
| age.yrs       | <  | 69.84257358 Hemoglobin.resultn | =  | Missing             | ALB.resultn   | >=          | 3.95    | 0.000751122  | 1891 |
| age.yrs       | <  | 69.84257358 Hemoglobin.resultn | <  | 11.35               |               |             | Missing | 0.000375358  | 1891 |
| age.yrs       | <  | 69.84257358 Hemoglobin.resultn | >= | 11.35               |               |             | Missing | 0.000551995  | 1891 |
| age.yrs       | >= | 69.84257358                    |    |                     |               |             | Missing | 0.00505188   | 1891 |
| ALB.resultn   | =  | Missing                        |    |                     |               |             | Missing | -0.002466215 | 1892 |
| ALB.resultn   | <  | 2.915                          |    |                     |               |             | Missing | -0.000925642 | 1892 |
| ALB.resultn   | >= | 2.915 Hemoglobin.resultn       | =  | Missing             |               |             | Missing | -0.001799273 | 1892 |
| ALB.resultn   | >= | 2.915 Hemoglobin.resultn       | <  | 12.35               |               |             | Missing | -0.002757865 | 1892 |
| ALB.resultn   | >= | 2.915 Hemoglobin.resultn       | >= | 12.35 ALK.times.uln | =             | Missing     |         | -0.002249971 | 1892 |
| ALB.resultn   | >= | 2.915 Hemoglobin.resultn       | >= | 12.35 ALK.times.uln | <             | 5.182608696 |         | -0.002454514 | 1892 |
| ALB.resultn   | >= | 2.915 Hemoglobin.resultn       | >= | 12.35 ALK.times.uln | >=            | 5.182608696 |         | 0            | 1892 |
| age.yrs       | =  | Missing                        |    |                     |               |             | Missing | -0.0010573   | 1893 |
| age.yrs       | <  | 69.84257358 Sodium.resultn     | =  | Missing             | TBILL.resultn | =           | Missing | -0.001563969 | 1893 |
| age.yrs       | <  | 69.84257358 Sodium.resultn     | =  | Missing             | TBILL.resultn | <           | 1.25    | -0.001809735 | 1893 |
| age.yrs       | <  | 69.84257358 Sodium.resultn     | =  | Missing             | TBILL.resultn | >=          | 1.25    | 0            | 1893 |
| age.yrs       | <  | 69.84257358 Sodium.resultn     | <  | 136.5               |               |             | Missing | 0.000391045  | 1893 |
| age.yrs       | <  | 69.84257358 Sodium.resultn     | >= | 136.5               |               |             | Missing | -0.00109012  | 1893 |
| age.yrs       | >= | 69.84257358                    |    |                     |               |             | Missing | 0.001487232  | 1893 |
| PLT.resultn   | =  | Missing                        |    |                     |               |             | Missing | 0.000524764  | 1894 |
| PLT.resultn   | <  | 413 ALB.resultn                | =  | Missing             |               |             | Missing | -0.001274817 | 1894 |
| PLT.resultn   | <  | 413 ALB.resultn                | <  | 3.135               |               |             | Missing | -0.00089728  | 1894 |
| PLT.resultn   | <  | 413 ALB.resultn                | >= | 3.135 ALK.times.uln | =             | Missing     |         | 0            | 1894 |
| PLT.resultn   | <  | 413 ALB.resultn                | >= | 3.135 ALK.times.uln | <             | 2.815208295 |         | -0.001295036 | 1894 |
| PLT.resultn   | <  | 413 ALB.resultn                | >= | 3.135 ALK.times.uln | >=            | 2.815208295 |         | 0.001013267  | 1894 |
| PLT.resultn   | >= | 413                            |    |                     |               |             | Missing | 0.000598011  | 1894 |
| age.yrs       | =  | Missing                        |    |                     |               |             | Missing | -0.000461383 | 1895 |
| age.yrs       | <  | 53.64681725                    |    |                     |               |             | Missing | -0.000689252 | 1895 |
| age.yrs       | >= | 53.64681725 AST.resultn        | =  | Missing             |               |             | Missing | 0.000187697  | 1895 |
| age.yrs       | >= | 53.64681725 AST.resultn        | <  | 51.5                |               |             | Missing | -0.00115928  | 1895 |
| age.yrs       | >= | 53.64681725 AST.resultn        | >= | 51.5 AST.resultn    | =             | Missing     |         | 0.002015737  | 1895 |
| age.yrs       | >= | 53.64681725 AST.resultn        | >= | 51.5 AST.resultn    | <             | 74.5        |         | 0.004341587  | 1895 |
| age.yrs       | >= | 53.64681725 AST.resultn        | >= | 51.5 AST.resultn    | >=            | 74.5        |         | 0            | 1895 |
| ALB.resultn   | =  | Missing                        |    |                     |               |             | Missing | -0.002246824 | 1896 |
| ALB.resultn   | <  | 2.915                          |    |                     |               |             | Missing | -0.001119962 | 1896 |

|                    |    |         |                    |    |             |                    |              |             |              |      |
|--------------------|----|---------|--------------------|----|-------------|--------------------|--------------|-------------|--------------|------|
| ALB.resultn        | >= | 2.915   | ALK.times.uln      | =  | Missing     | Missing            | -0.002141886 | 1896        |              |      |
| ALB.resultn        | >= | 2.915   | ALK.times.uln      | <  | 7.72173913  | ALK.times.uln      | =            | Missing     | -0.002161586 | 1896 |
| ALB.resultn        | >= | 2.915   | ALK.times.uln      | <  | 7.72173913  | ALK.times.uln      | <            | 4.997016628 | -0.002307639 | 1896 |
| ALB.resultn        | >= | 2.915   | ALK.times.uln      | <  | 7.72173913  | ALK.times.uln      | >=           | 4.997016628 | 0            | 1896 |
| ALB.resultn        | >= | 2.915   | ALK.times.uln      | >= | 7.72173913  | Missing            |              |             | -0.002679392 | 1896 |
| Hemoglobin.resultn | =  | Missing | ALB.resultn        | =  | Missing     |                    |              |             | -0.000413816 | 1897 |
| Hemoglobin.resultn | =  | Missing | ALB.resultn        | <  | 3.75        |                    |              |             | 0.003282798  | 1897 |
| Hemoglobin.resultn | =  | Missing | ALB.resultn        | >= | 3.75        |                    |              |             | 0.000808626  | 1897 |
| Hemoglobin.resultn | <  | 11.75   |                    |    |             |                    |              |             | 8.32E-05     | 1897 |
| Hemoglobin.resultn | >= | 11.75   | psc.yrs.dur        | =  | Missing     |                    |              |             | 0.000424333  | 1897 |
| Hemoglobin.resultn | >= | 11.75   | psc.yrs.dur        | <  | 0.042436687 |                    |              |             | 0.002385044  | 1897 |
| Hemoglobin.resultn | >= | 11.75   | psc.yrs.dur        | >= | 0.042436687 |                    |              |             | 0            | 1897 |
| TBILL.resultn      | =  | Missing |                    |    |             | Missing            |              |             | 0.000861512  | 1898 |
| TBILL.resultn      | <  | 1.55    |                    |    |             | Missing            |              |             | 0.0004547    | 1898 |
| TBILL.resultn      | >= | 1.55    | ALB.resultn        | =  | Missing     | Missing            |              |             | 0.001599801  | 1898 |
| TBILL.resultn      | >= | 1.55    | ALB.resultn        | <  | 3.55        | Missing            |              |             | 0.002764213  | 1898 |
| TBILL.resultn      | >= | 1.55    | ALB.resultn        | >= | 3.55        | Hemoglobin.resultn | =            | Missing     | 0.001040883  | 1898 |
| TBILL.resultn      | >= | 1.55    | ALB.resultn        | >= | 3.55        | Hemoglobin.resultn | <            | 13.9        | 0.002081767  | 1898 |
| TBILL.resultn      | >= | 1.55    | ALB.resultn        | >= | 3.55        | Hemoglobin.resultn | >=           | 13.9        | 0            | 1898 |
| ALB.resultn        | =  | Missing |                    |    |             | Missing            |              |             | -0.001384488 | 1899 |
| ALB.resultn        | <  | 2.965   |                    |    |             | Missing            |              |             | -0.000290961 | 1899 |
| ALB.resultn        | >= | 2.965   | TBILL.resultn      | =  | Missing     | Missing            |              |             | -0.00134374  | 1899 |
| ALB.resultn        | >= | 2.965   | TBILL.resultn      | <  | 3.75        | TBILL.resultn      | =            | Missing     | -0.00132565  | 1899 |
| ALB.resultn        | >= | 2.965   | TBILL.resultn      | <  | 3.75        | TBILL.resultn      | <            | 1.65        | -0.001508751 | 1899 |
| ALB.resultn        | >= | 2.965   | TBILL.resultn      | <  | 3.75        | TBILL.resultn      | >=           | 1.65        | 0            | 1899 |
| ALB.resultn        | >= | 2.965   | TBILL.resultn      | >= | 3.75        | Missing            |              |             | -0.001716385 | 1899 |
| Sodium.resultn     | =  | Missing | psc.yrs.dur        | =  | Missing     |                    |              |             | -0.001764333 | 1900 |
| Sodium.resultn     | =  | Missing | psc.yrs.dur        | <  | 3.403148528 |                    |              |             | -0.002168217 | 1900 |
| Sodium.resultn     | =  | Missing | psc.yrs.dur        | >= | 3.403148528 |                    |              |             | 0            | 1900 |
| Sodium.resultn     | <  | 136.5   |                    |    |             |                    |              |             | 0.000945302  | 1900 |
| Sodium.resultn     | >= | 136.5   | age.yrs            | =  | Missing     |                    |              |             | -0.00145525  | 1900 |
| Sodium.resultn     | >= | 136.5   | age.yrs            | <  | 64.62149213 |                    |              |             | -0.001797319 | 1900 |
| Sodium.resultn     | >= | 136.5   | age.yrs            | >= | 64.62149213 |                    |              |             | 0.001574511  | 1900 |
| TBILL.resultn      | =  | Missing |                    |    |             |                    |              |             | -0.001586392 | 1901 |
| TBILL.resultn      | <  | 2.05    | age.yrs            | =  | Missing     |                    |              |             | -0.002067222 | 1901 |
| TBILL.resultn      | <  | 2.05    | age.yrs            | <  | 68.99931554 |                    |              |             | -0.002219973 | 1901 |
| TBILL.resultn      | <  | 2.05    | age.yrs            | >= | 68.99931554 |                    |              |             | 0            | 1901 |
| TBILL.resultn      | >= | 2.05    | psc.yrs.dur        | =  | Missing     |                    |              |             | -0.000882965 | 1901 |
| TBILL.resultn      | >= | 2.05    | psc.yrs.dur        | <  | 1.141683778 |                    |              |             | -0.001410825 | 1901 |
| TBILL.resultn      | >= | 2.05    | psc.yrs.dur        | >= | 1.141683778 |                    |              |             | -0.00030232  | 1901 |
| ALB.resultn        | =  | Missing |                    |    |             |                    |              |             | 0.001128809  | 1902 |
| ALB.resultn        | <  | 3.31    | psc.yrs.dur        | =  | Missing     |                    |              |             | 0.001869176  | 1902 |
| ALB.resultn        | <  | 3.31    | psc.yrs.dur        | <  | 2.205338809 |                    |              |             | 0.000908683  | 1902 |
| ALB.resultn        | <  | 3.31    | psc.yrs.dur        | >= | 2.205338809 |                    |              |             | 0.002903554  | 1902 |
| ALB.resultn        | >= | 3.31    | TBILL.resultn      | =  | Missing     |                    |              |             | 0.000658067  | 1902 |
| ALB.resultn        | >= | 3.31    | TBILL.resultn      | <  | 2.6         |                    |              |             | 0.000694224  | 1902 |
| ALB.resultn        | >= | 3.31    | TBILL.resultn      | >= | 2.6         |                    |              |             | 0            | 1902 |
| TBILL.resultn      | =  | Missing |                    |    |             |                    |              |             | 0.001566601  | 1903 |
| TBILL.resultn      | <  | 1.31    | ALB.resultn        | =  | Missing     |                    |              |             | 0            | 1903 |
| TBILL.resultn      | <  | 1.31    | ALB.resultn        | <  | 3.27        |                    |              |             | -4.05E-05    | 1903 |
| TBILL.resultn      | <  | 1.31    | ALB.resultn        | >= | 3.27        |                    |              |             | 0.000598004  | 1903 |
| TBILL.resultn      | >= | 1.31    | Hemoglobin.resultn | =  | Missing     |                    |              |             | 0.000801917  | 1903 |
| TBILL.resultn      | >= | 1.31    | Hemoglobin.resultn | <  | 13.3        |                    |              |             | 0.002122747  | 1903 |
| TBILL.resultn      | >= | 1.31    | Hemoglobin.resultn | >= | 13.3        |                    |              |             | -5.95E-05    | 1903 |
| ALB.resultn        | =  | Missing |                    |    |             | Missing            |              |             | -0.000677491 | 1904 |
| ALB.resultn        | <  | 3.03    |                    |    |             | Missing            |              |             | 0.000616272  | 1904 |
| ALB.resultn        | >= | 3.03    | TBILL.resultn      | =  | Missing     | Missing            |              |             | -0.000801733 | 1904 |
| ALB.resultn        | >= | 3.03    | TBILL.resultn      | <  | 3.1         | TBILL.resultn      | =            | Missing     | -0.000784235 | 1904 |
| ALB.resultn        | >= | 3.03    | TBILL.resultn      | <  | 3.1         | TBILL.resultn      | <            | 0.75        | -0.001583552 | 1904 |
| ALB.resultn        | >= | 3.03    | TBILL.resultn      | <  | 3.1         | TBILL.resultn      | >=           | 0.75        | 0            | 1904 |
| ALB.resultn        | >= | 3.03    | TBILL.resultn      | >= | 3.1         | Missing            |              |             | -0.001169182 | 1904 |
| ALB.resultn        | =  | Missing |                    |    |             | Missing            |              |             | -0.001832513 | 1905 |



|                |    |             |                    |    |             |               |              |              |              |      |
|----------------|----|-------------|--------------------|----|-------------|---------------|--------------|--------------|--------------|------|
| ALB.resultn    | <  | 3.62        | PLT.resultn        | =  | Missing     | Missing       | -0.000977311 | 1905         |              |      |
| ALB.resultn    | <  | 3.62        | PLT.resultn        | <  | 215         | Missing       | 8.61E-05     | 1905         |              |      |
| ALB.resultn    | <  | 3.62        | PLT.resultn        | >= | 215         | ALK.times.uln | =            | Missing      | -0.0013045   | 1905 |
| ALB.resultn    | <  | 3.62        | PLT.resultn        | >= | 215         | ALK.times.uln | <            | 4.942639192  | -0.001848042 | 1905 |
| ALB.resultn    | <  | 3.62        | PLT.resultn        | >= | 215         | ALK.times.uln | >=           | 4.942639192  | 0            | 1905 |
| ALB.resultn    | >= | 3.62        |                    |    |             | Missing       | -0.001248576 | 1905         |              |      |
| ALB.resultn    | =  | Missing     |                    |    |             | Missing       | -0.000254684 | 1906         |              |      |
| ALB.resultn    | <  | 2.915       |                    |    |             | Missing       | 0.001212076  | 1906         |              |      |
| ALB.resultn    | >= | 2.915       | PLT.resultn        | =  | Missing     | Missing       | 0.001113656  | 1906         |              |      |
| ALB.resultn    | >= | 2.915       | PLT.resultn        | <  | 185.5       | Missing       | 0.001461826  | 1906         |              |      |
| ALB.resultn    | >= | 2.915       | PLT.resultn        | >= | 185.5       | ALB.resultn   | =            | Missing      | -2.30E-05    | 1906 |
| ALB.resultn    | >= | 2.915       | PLT.resultn        | >= | 185.5       | ALB.resultn   | <            | 3.135        | -0.000371415 | 1906 |
| ALB.resultn    | >= | 2.915       | PLT.resultn        | >= | 185.5       | ALB.resultn   | >=           | 3.135        | 0            | 1906 |
| ALB.resultn    | =  | Missing     |                    |    |             | Missing       | 0.000352703  | 1907         |              |      |
| ALB.resultn    | <  | 3.65        | PLT.resultn        | =  | Missing     | Missing       | -0.000852777 | 1907         |              |      |
| ALB.resultn    | <  | 3.65        | PLT.resultn        | <  | 220.5       | Missing       | 0.00052834   | 1907         |              |      |
| ALB.resultn    | <  | 3.65        | PLT.resultn        | >= | 220.5       | ALK.times.uln | =            | Missing      | -0.001198056 | 1907 |
| ALB.resultn    | <  | 3.65        | PLT.resultn        | >= | 220.5       | ALK.times.uln | <            | 5.265120427  | -0.001742627 | 1907 |
| ALB.resultn    | <  | 3.65        | PLT.resultn        | >= | 220.5       | ALK.times.uln | >=           | 5.265120427  | 0            | 1907 |
| ALB.resultn    | >= | 3.65        |                    |    |             | Missing       | -0.001343443 | 1907         |              |      |
| ALB.resultn    | =  | Missing     | psc.yrs.dur        | =  | Missing     |               | -0.000106002 | 1908         |              |      |
| ALB.resultn    | =  | Missing     | psc.yrs.dur        | <  | 0.245037645 |               | 0.00297335   | 1908         |              |      |
| ALB.resultn    | =  | Missing     | psc.yrs.dur        | >= | 0.245037645 |               | -0.001645678 | 1908         |              |      |
| ALB.resultn    | <  | 2.85        |                    |    |             |               | 0.000211803  | 1908         |              |      |
| ALB.resultn    | >= | 2.85        | PLT.resultn        | =  | Missing     |               | 0            | 1908         |              |      |
| ALB.resultn    | >= | 2.85        | PLT.resultn        | <  | 209.5       |               | -0.000158156 | 1908         |              |      |
| ALB.resultn    | >= | 2.85        | PLT.resultn        | >= | 209.5       |               | -0.001288179 | 1908         |              |      |
| psc.yrs.dur    | =  | Missing     |                    |    |             |               | 0.000257424  | 1909         |              |      |
| psc.yrs.dur    | <  | 6.592744695 | PLT.resultn        | =  | Missing     |               | 0            | 1909         |              |      |
| psc.yrs.dur    | <  | 6.592744695 | PLT.resultn        | <  | 209.5       |               | 0.001302207  | 1909         |              |      |
| psc.yrs.dur    | <  | 6.592744695 | PLT.resultn        | >= | 209.5       |               | -0.000227398 | 1909         |              |      |
| psc.yrs.dur    | >= | 6.592744695 | ALK.times.uln      | =  | Missing     |               | 0.000909461  | 1909         |              |      |
| psc.yrs.dur    | >= | 6.592744695 | ALK.times.uln      | <  | 2.815208295 |               | 0.001061479  | 1909         |              |      |
| psc.yrs.dur    | >= | 6.592744695 | ALK.times.uln      | >= | 2.815208295 |               | 0.002473325  | 1909         |              |      |
| Sodium.resultn | =  | Missing     |                    |    |             | Missing       | -0.002846592 | 1910         |              |      |
| Sodium.resultn | <  | 136.5       |                    |    |             | Missing       | -0.000859842 | 1910         |              |      |
| Sodium.resultn | >= | 136.5       | Hemoglobin.resultn | =  | Missing     | psc.yrs.dur   | =            | Missing      | -0.001277497 | 1910 |
| Sodium.resultn | >= | 136.5       | Hemoglobin.resultn | =  | Missing     | psc.yrs.dur   | <            | 0.425735797  | -0.003135675 | 1910 |
| Sodium.resultn | >= | 136.5       | Hemoglobin.resultn | =  | Missing     | psc.yrs.dur   | >=           | 0.425735797  | 0            | 1910 |
| Sodium.resultn | >= | 136.5       | Hemoglobin.resultn | <  | 11.55       |               | Missing      | -0.002458192 | 1910         |      |
| Sodium.resultn | >= | 136.5       | Hemoglobin.resultn | >= | 11.55       |               | Missing      | -0.002092382 | 1910         |      |
| psc.yrs.dur    | =  | Missing     |                    |    |             |               | 0.000716678  | 1911         |              |      |
| psc.yrs.dur    | <  | 6.783025325 | ALB.resultn        | =  | Missing     |               | 0            | 1911         |              |      |
| psc.yrs.dur    | <  | 6.783025325 | ALB.resultn        | <  | 2.915       |               | 0.001516269  | 1911         |              |      |
| psc.yrs.dur    | <  | 6.783025325 | ALB.resultn        | >= | 2.915       |               | 0.00064427   | 1911         |              |      |
| psc.yrs.dur    | >= | 6.783025325 | AST.resultn        | =  | Missing     |               | 0.001554099  | 1911         |              |      |
| psc.yrs.dur    | >= | 6.783025325 | AST.resultn        | <  | 42          |               | -1.60E-05    | 1911         |              |      |
| psc.yrs.dur    | >= | 6.783025325 | AST.resultn        | >= | 42          |               | 0.002787772  | 1911         |              |      |
| psc.yrs.dur    | =  | Missing     |                    |    |             | Missing       | -0.002593555 | 1912         |              |      |
| psc.yrs.dur    | <  | 6.592744695 |                    |    |             | Missing       | -0.002697431 | 1912         |              |      |
| psc.yrs.dur    | >= | 6.592744695 | AST.resultn        | =  | Missing     |               | Missing      | -0.002003103 | 1912         |      |
| psc.yrs.dur    | >= | 6.592744695 | AST.resultn        | <  | 47          |               | Missing      | -0.003480288 | 1912         |      |
| psc.yrs.dur    | >= | 6.592744695 | AST.resultn        | >= | 47          | age.yrs       | =            | Missing      | -0.000947971 | 1912 |
| psc.yrs.dur    | >= | 6.592744695 | AST.resultn        | >= | 47          | age.yrs       | <            | 51.51813826  | -0.001990739 | 1912 |
| psc.yrs.dur    | >= | 6.592744695 | AST.resultn        | >= | 47          | age.yrs       | >=           | 51.51813826  | 0            | 1912 |
| age.yrs        | =  | Missing     |                    |    |             | Missing       | -0.000457726 | 1913         |              |      |
| age.yrs        | <  | 69.76043806 | TBILL.resultn      | =  | Missing     |               | Missing      | -0.001140289 | 1913         |      |
| age.yrs        | <  | 69.76043806 | TBILL.resultn      | <  | 2.05        |               | Missing      | -0.000650473 | 1913         |      |
| age.yrs        | <  | 69.76043806 | TBILL.resultn      | >= | 2.05        | PLT.resultn   | =            | Missing      | 0.000240125  | 1913 |
| age.yrs        | <  | 69.76043806 | TBILL.resultn      | >= | 2.05        | PLT.resultn   | <            | 224.5        | 0.0005763    | 1913 |
| age.yrs        | <  | 69.76043806 | TBILL.resultn      | >= | 2.05        | PLT.resultn   | >=           | 224.5        | 0            | 1913 |
| age.yrs        | >= | 69.76043806 |                    |    |             | Missing       | 0.002615487  | 1913         |              |      |

|                    |    |             |                |    |             |               |              |              |              |      |
|--------------------|----|-------------|----------------|----|-------------|---------------|--------------|--------------|--------------|------|
| age.yrs            | =  | Missing     |                |    | Missing     | -0.00040659   | 1914         |              |              |      |
| age.yrs            | <  | 69.89459274 | TBILL.resultn  | =  | Missing     | Missing       | 0.00080228   | 1914         |              |      |
| age.yrs            | <  | 69.89459274 | TBILL.resultn  | <  | 1.05        | Missing       | -0.001056925 | 1914         |              |      |
| age.yrs            | <  | 69.89459274 | TBILL.resultn  | >= | 1.05        | PLT.resultn   | =            | Missing      | 0.000371542  | 1914 |
| age.yrs            | <  | 69.89459274 | TBILL.resultn  | >= | 1.05        | PLT.resultn   | <            | 209.5        | 0.00185771   | 1914 |
| age.yrs            | <  | 69.89459274 | TBILL.resultn  | >= | 1.05        | PLT.resultn   | >=           | 209.5        | 0            | 1914 |
| age.yrs            | >= | 69.89459274 |                |    |             | Missing       | 0.002573746  | 1914         |              |      |
| ALK.times.uln      | =  | Missing     |                |    |             | Missing       | -0.000796158 | 1915         |              |      |
| ALK.times.uln      | <  | 8.257538256 | ALK.times.uln  | =  | Missing     | Missing       | -0.001031158 | 1915         |              |      |
| ALK.times.uln      | <  | 8.257538256 | ALK.times.uln  | <  | 5.462893197 | psc.yrs.dur   | =            | Missing      | -0.001166743 | 1915 |
| ALK.times.uln      | <  | 8.257538256 | ALK.times.uln  | <  | 5.462893197 | psc.yrs.dur   | <            | 2.05065024   | -0.001555658 | 1915 |
| ALK.times.uln      | <  | 8.257538256 | ALK.times.uln  | <  | 5.462893197 | psc.yrs.dur   | >=           | 2.05065024   | 0            | 1915 |
| ALK.times.uln      | <  | 8.257538256 | ALK.times.uln  | >= | 5.462893197 |               | Missing      | 0.000451235  | 1915         |      |
| ALK.times.uln      | >= | 8.257538256 |                |    |             | Missing       | -0.001337651 | 1915         |              |      |
| Hemoglobin.resultn | =  | Missing     | TBILL.resultn  | =  | Missing     |               | 0.000822202  | 1916         |              |      |
| Hemoglobin.resultn | =  | Missing     | TBILL.resultn  | <  | 1.15        |               | 4.01E-05     | 1916         |              |      |
| Hemoglobin.resultn | =  | Missing     | TBILL.resultn  | >= | 1.15        |               | 0.00258186   | 1916         |              |      |
| Hemoglobin.resultn | <  | 11.95       | ALK.times.uln  | =  | Missing     |               | 0.000637031  | 1916         |              |      |
| Hemoglobin.resultn | <  | 11.95       | ALK.times.uln  | <  | 2.981025039 |               | 0.001274061  | 1916         |              |      |
| Hemoglobin.resultn | <  | 11.95       | ALK.times.uln  | >= | 2.981025039 |               | 0            | 1916         |              |      |
| Hemoglobin.resultn | >= | 11.95       |                |    |             |               | 0.000165991  | 1916         |              |      |
| TBILL.resultn      | =  | Missing     |                |    |             | Missing       | -0.0013408   | 1917         |              |      |
| TBILL.resultn      | <  | 3.35        | age.yrs        | =  | Missing     | Missing       | -0.002721993 | 1917         |              |      |
| TBILL.resultn      | <  | 3.35        | age.yrs        | <  | 53.33470226 |               | Missing      | -0.003067146 | 1917         |      |
| TBILL.resultn      | <  | 3.35        | age.yrs        | >= | 53.33470226 | TBILL.resultn | =            | Missing      | -0.001686531 | 1917 |
| TBILL.resultn      | <  | 3.35        | age.yrs        | >= | 53.33470226 | TBILL.resultn | <            | 0.75         | -0.003314906 | 1917 |
| TBILL.resultn      | <  | 3.35        | age.yrs        | >= | 53.33470226 | TBILL.resultn | >=           | 0.75         | 0            | 1917 |
| TBILL.resultn      | >= | 3.35        |                |    |             | Missing       | -0.00153509  | 1917         |              |      |
| psc.yrs.dur        | =  | Missing     |                |    |             | Missing       | 0.000828545  | 1918         |              |      |
| psc.yrs.dur        | <  | 6.561259411 |                |    |             | Missing       | 0.000723152  | 1918         |              |      |
| psc.yrs.dur        | >= | 6.561259411 | ALB.resultn    | =  | Missing     | Missing       | 0.001376073  | 1918         |              |      |
| psc.yrs.dur        | >= | 6.561259411 | ALB.resultn    | <  | 3.35        | Missing       | 0.002671028  | 1918         |              |      |
| psc.yrs.dur        | >= | 6.561259411 | ALB.resultn    | >= | 3.35        | psc.yrs.dur   | =            | Missing      | 0.000913589  | 1918 |
| psc.yrs.dur        | >= | 6.561259411 | ALB.resultn    | >= | 3.35        | psc.yrs.dur   | <            | 9.954825462  | 0.002558049  | 1918 |
| psc.yrs.dur        | >= | 6.561259411 | ALB.resultn    | >= | 3.35        | psc.yrs.dur   | >=           | 9.954825462  | 0            | 1918 |
| Hemoglobin.resultn | =  | Missing     |                |    |             | Missing       | -0.00189955  | 1919         |              |      |
| Hemoglobin.resultn | <  | 13.85       | PLT.resultn    | =  | Missing     | Missing       | -0.002276152 | 1919         |              |      |
| Hemoglobin.resultn | <  | 13.85       | PLT.resultn    | <  | 246.5       | ALK.times.uln | =            | Missing      | -0.001613668 | 1919 |
| Hemoglobin.resultn | <  | 13.85       | PLT.resultn    | <  | 246.5       | ALK.times.uln | <            | 1.613620325  | -0.003103207 | 1919 |
| Hemoglobin.resultn | <  | 13.85       | PLT.resultn    | <  | 246.5       | ALK.times.uln | >=           | 1.613620325  | 0            | 1919 |
| Hemoglobin.resultn | <  | 13.85       | PLT.resultn    | >= | 246.5       |               | Missing      | -0.002533235 | 1919         |      |
| Hemoglobin.resultn | >= | 13.85       |                |    |             | Missing       | -0.003103997 | 1919         |              |      |
| age.yrs            | =  | Missing     |                |    |             | Missing       | -0.002372967 | 1920         |              |      |
| age.yrs            | <  | 49.02395619 |                |    |             | Missing       | -0.002563272 | 1920         |              |      |
| age.yrs            | >= | 49.02395619 | psc.yrs.dur    | =  | Missing     | Missing       | -0.002001208 | 1920         |              |      |
| age.yrs            | >= | 49.02395619 | psc.yrs.dur    | <  | 0.476386037 |               | Missing      | -0.002746337 | 1920         |      |
| age.yrs            | >= | 49.02395619 | psc.yrs.dur    | >= | 0.476386037 | AST.resultn   | =            | Missing      | -0.00143856  | 1920 |
| age.yrs            | >= | 49.02395619 | psc.yrs.dur    | >= | 0.476386037 | AST.resultn   | <            | 58.5         | -0.002937059 | 1920 |
| age.yrs            | >= | 49.02395619 | psc.yrs.dur    | >= | 0.476386037 | AST.resultn   | >=           | 58.5         | 0            | 1920 |
| PLT.resultn        | =  | Missing     |                |    |             | Missing       | -0.000691797 | 1921         |              |      |
| PLT.resultn        | <  | 249.5       | ALK.times.uln  | =  | Missing     | AST.resultn   | =            | Missing      | 0.001232657  | 1921 |
| PLT.resultn        | <  | 249.5       | ALK.times.uln  | =  | Missing     | AST.resultn   | <            | 70.5         | 0.002362593  | 1921 |
| PLT.resultn        | <  | 249.5       | ALK.times.uln  | =  | Missing     | AST.resultn   | >=           | 70.5         | 0            | 1921 |
| PLT.resultn        | <  | 249.5       | ALK.times.uln  | <  | 2.85059761  |               | Missing      | 0.000565357  | 1921         |      |
| PLT.resultn        | <  | 249.5       | ALK.times.uln  | >= | 2.85059761  |               | Missing      | 0.001785596  | 1921         |      |
| PLT.resultn        | >= | 249.5       |                |    |             | Missing       | -0.000468904 | 1921         |              |      |
| AST.resultn        | =  | Missing     |                |    |             | Missing       | -0.000421354 | 1922         |              |      |
| AST.resultn        | <  | 213.5       | Sodium.resultn | =  | Missing     | Missing       | 0.000244906  | 1922         |              |      |
| AST.resultn        | <  | 213.5       | Sodium.resultn | <  | 136.5       | Missing       | 0.001093443  | 1922         |              |      |
| AST.resultn        | <  | 213.5       | Sodium.resultn | >= | 136.5       | TBILL.resultn | =            | Missing      | 0.000476277  | 1922 |
| AST.resultn        | <  | 213.5       | Sodium.resultn | >= | 136.5       | TBILL.resultn | <            | 1.45         | 0.000582589  | 1922 |
| AST.resultn        | <  | 213.5       | Sodium.resultn | >= | 136.5       | TBILL.resultn | >=           | 1.45         | 0            | 1922 |

|               |    |             |                |    |             |               |              |              |              |      |
|---------------|----|-------------|----------------|----|-------------|---------------|--------------|--------------|--------------|------|
| AST.resultn   | >= | 213.5       |                |    |             | Missing       | 0.003115612  | 1922         |              |      |
| PLT.resultn   | =  | Missing     |                |    |             | Missing       | -0.002415865 | 1923         |              |      |
| PLT.resultn   | <  | 185.5       |                |    |             | Missing       | -0.000327163 | 1923         |              |      |
| PLT.resultn   | >= | 185.5       | AST.resultn    | =  | Missing     | Missing       | -0.002091024 | 1923         |              |      |
| PLT.resultn   | >= | 185.5       | AST.resultn    | <  | 117.5       | AST.resultn   | =            | Missing      | -0.002016831 | 1923 |
| PLT.resultn   | >= | 185.5       | AST.resultn    | <  | 117.5       | AST.resultn   | <            | 99           | -0.002159044 | 1923 |
| PLT.resultn   | >= | 185.5       | AST.resultn    | <  | 117.5       | AST.resultn   | >=           | 99           | 0            | 1923 |
| PLT.resultn   | >= | 185.5       | AST.resultn    | >= | 117.5       |               | Missing      | -0.002490705 | 1923         |      |
| ALB.resultn   | =  | Missing     |                |    |             | Missing       | -0.001833298 | 1924         |              |      |
| ALB.resultn   | <  | 3.05        |                |    |             | Missing       | -0.000527073 | 1924         |              |      |
| ALB.resultn   | >= | 3.05        | Sodium.resultn | =  | Missing     | Missing       | -0.001887057 | 1924         |              |      |
| ALB.resultn   | >= | 3.05        | Sodium.resultn | <  | 137.5       | age.yrs       | =            | Missing      | -0.001152175 | 1924 |
| ALB.resultn   | >= | 3.05        | Sodium.resultn | <  | 137.5       | age.yrs       | <            | 49.69062286  | -0.001675891 | 1924 |
| ALB.resultn   | >= | 3.05        | Sodium.resultn | <  | 137.5       | age.yrs       | >=           | 49.69062286  | 0            | 1924 |
| ALB.resultn   | >= | 3.05        | Sodium.resultn | >= | 137.5       |               | Missing      | -0.002037063 | 1924         |      |
| TBILL.resultn | =  | Missing     |                |    |             |               | 0.001956724  | 1925         |              |      |
| TBILL.resultn | <  | 1.95        | AST.resultn    | =  | Missing     |               | 0.000853184  | 1925         |              |      |
| TBILL.resultn | <  | 1.95        | AST.resultn    | <  | 96.5        |               | 0.001042242  | 1925         |              |      |
| TBILL.resultn | <  | 1.95        | AST.resultn    | >= | 96.5        |               | 0            | 1925         |              |      |
| TBILL.resultn | >= | 1.95        | psc.yrs.dur    | =  | Missing     |               | 0.001356116  | 1925         |              |      |
| TBILL.resultn | >= | 1.95        | psc.yrs.dur    | <  | 0.704996578 |               | 0.00086734   | 1925         |              |      |
| TBILL.resultn | >= | 1.95        | psc.yrs.dur    | >= | 0.704996578 |               | 0.001942648  | 1925         |              |      |
| ALB.resultn   | =  | Missing     |                |    |             | Missing       | -0.00199634  | 1926         |              |      |
| ALB.resultn   | <  | 3.75        | AST.resultn    | =  | Missing     | Missing       | -0.001382761 | 1926         |              |      |
| ALB.resultn   | <  | 3.75        | AST.resultn    | <  | 53          |               | Missing      | -0.002720093 | 1926         |      |
| ALB.resultn   | <  | 3.75        | AST.resultn    | >= | 53          | psc.yrs.dur   | =            | Missing      | -0.000949032 | 1926 |
| ALB.resultn   | <  | 3.75        | AST.resultn    | >= | 53          | psc.yrs.dur   | <            | 0.454483231  | -0.001848115 | 1926 |
| ALB.resultn   | <  | 3.75        | AST.resultn    | >= | 53          | psc.yrs.dur   | >=           | 0.454483231  | 0            | 1926 |
| ALB.resultn   | >= | 3.75        |                |    |             | Missing       | -0.002196438 | 1926         |              |      |
| age.yrs       | =  | Missing     |                |    |             | Missing       | -0.002511468 | 1927         |              |      |
| age.yrs       | <  | 53.4715948  |                |    |             | Missing       | -0.002619441 | 1927         |              |      |
| age.yrs       | >= | 53.4715948  | psc.yrs.dur    | =  | Missing     | Missing       | -0.002253771 | 1927         |              |      |
| age.yrs       | >= | 53.4715948  | psc.yrs.dur    | <  | 0.76659822  |               | Missing      | -0.00266775  | 1927         |      |
| age.yrs       | >= | 53.4715948  | psc.yrs.dur    | >= | 0.76659822  | AST.resultn   | =            | Missing      | -0.001780651 | 1927 |
| age.yrs       | >= | 53.4715948  | psc.yrs.dur    | >= | 0.76659822  | AST.resultn   | <            | 57.5         | -0.003186429 | 1927 |
| age.yrs       | >= | 53.4715948  | psc.yrs.dur    | >= | 0.76659822  | AST.resultn   | >=           | 57.5         | 0            | 1927 |
| ALB.resultn   | =  | Missing     |                |    |             | Missing       | -0.001702323 | 1928         |              |      |
| ALB.resultn   | <  | 2.915       |                |    |             | Missing       | -0.000293929 | 1928         |              |      |
| ALB.resultn   | >= | 2.915       | age.yrs        | =  | Missing     | Missing       | -0.001655112 | 1928         |              |      |
| ALB.resultn   | >= | 2.915       | age.yrs        | <  | 53.4715948  |               | Missing      | -0.001930892 | 1928         |      |
| ALB.resultn   | >= | 2.915       | age.yrs        | >= | 53.4715948  | TBILL.resultn | =            | Missing      | -0.000921257 | 1928 |
| ALB.resultn   | >= | 2.915       | age.yrs        | >= | 53.4715948  | TBILL.resultn | <            | 1.25         | -0.001113186 | 1928 |
| ALB.resultn   | >= | 2.915       | age.yrs        | >= | 53.4715948  | TBILL.resultn | >=           | 1.25         | 0            | 1928 |
| ALK.times.uln | =  | Missing     | Sodium.resultn | =  | Missing     |               | 0            | 1929         |              |      |
| ALK.times.uln | =  | Missing     | Sodium.resultn | <  | 140.5       |               | 0.001387259  | 1929         |              |      |
| ALK.times.uln | =  | Missing     | Sodium.resultn | >= | 140.5       |               | 0.00045234   | 1929         |              |      |
| ALK.times.uln | <  | 6.02        | PLT.resultn    | =  | Missing     |               | 0.002507804  | 1929         |              |      |
| ALK.times.uln | <  | 6.02        | PLT.resultn    | <  | 185.5       |               | 0.00251763   | 1929         |              |      |
| ALK.times.uln | <  | 6.02        | PLT.resultn    | >= | 185.5       |               | 0.000403018  | 1929         |              |      |
| ALK.times.uln | >= | 6.02        |                |    |             |               | 0.001787657  | 1929         |              |      |
| psc.yrs.dur   | =  | Missing     |                |    |             | Missing       | -0.001470058 | 1930         |              |      |
| psc.yrs.dur   | <  | 1.916495551 |                |    |             | Missing       | -0.001686716 | 1930         |              |      |
| psc.yrs.dur   | >= | 1.916495551 | psc.yrs.dur    | =  | Missing     | Missing       | -0.001054175 | 1930         |              |      |
| psc.yrs.dur   | >= | 1.916495551 | psc.yrs.dur    | <  | 9.863107461 | AST.resultn   | =            | Missing      | -0.000679098 | 1930 |
| psc.yrs.dur   | >= | 1.916495551 | psc.yrs.dur    | <  | 9.863107461 | AST.resultn   | <            | 44.5         | -0.002180261 | 1930 |
| psc.yrs.dur   | >= | 1.916495551 | psc.yrs.dur    | <  | 9.863107461 | AST.resultn   | >=           | 44.5         | 0            | 1930 |
| psc.yrs.dur   | >= | 1.916495551 | psc.yrs.dur    | >= | 9.863107461 |               | Missing      | -0.002232991 | 1930         |      |
| ALK.times.uln | =  | Missing     | TBILL.resultn  | =  | Missing     |               | 0            | 1931         |              |      |
| ALK.times.uln | =  | Missing     | TBILL.resultn  | <  | 1.45        |               | -4.58E-05    | 1931         |              |      |
| ALK.times.uln | =  | Missing     | TBILL.resultn  | >= | 1.45        |               | 0.002249538  | 1931         |              |      |
| ALK.times.uln | <  | 7.794978567 | TBILL.resultn  | =  | Missing     |               | 0.001093888  | 1931         |              |      |
| ALK.times.uln | <  | 7.794978567 | TBILL.resultn  | <  | 2.75        |               | 0.001019186  | 1931         |              |      |

|               |    |             |               |    |             |                    |         |             |              |      |
|---------------|----|-------------|---------------|----|-------------|--------------------|---------|-------------|--------------|------|
| ALK.times.uln | <  | 7.794978567 | TBILL.resultn | >= | 2.75        |                    |         | 0.002261944 | 1931         |      |
| ALK.times.uln | >= | 7.794978567 |               |    |             |                    |         | 0.000505057 | 1931         |      |
| age.yrs       | =  | Missing     |               |    |             |                    | Missing | 0.000674168 | 1932         |      |
| age.yrs       | <  | 69.70978782 | TBILL.resultn | =  | Missing     |                    | Missing | -1.04E-05   | 1932         |      |
| age.yrs       | <  | 69.70978782 | TBILL.resultn | <  | 2.75        | Sodium.resultn     | =       | Missing     | 0            | 1932 |
| age.yrs       | <  | 69.70978782 | TBILL.resultn | <  | 2.75        | Sodium.resultn     | <       | 142.5       | 0.00038293   | 1932 |
| age.yrs       | <  | 69.70978782 | TBILL.resultn | <  | 2.75        | Sodium.resultn     | >=      | 142.5       | 0.003279561  | 1932 |
| age.yrs       | <  | 69.70978782 | TBILL.resultn | >= | 2.75        |                    |         | Missing     | 0.001437214  | 1932 |
| age.yrs       | >= | 69.70978782 |               |    |             |                    |         | Missing     | 0.003031834  | 1932 |
| AST.resultn   | =  | Missing     |               |    |             |                    |         | Missing     | 0.000761623  | 1933 |
| AST.resultn   | <  | 43          |               |    |             |                    |         | Missing     | -1.55E-05    | 1933 |
| AST.resultn   | >= | 43          | PLT.resultn   | =  | Missing     |                    |         | Missing     | 0.000866399  | 1933 |
| AST.resultn   | >= | 43          | PLT.resultn   | <  | 209.5       |                    |         | Missing     | 0.002274037  | 1933 |
| AST.resultn   | >= | 43          | PLT.resultn   | >= | 209.5       | TBILL.resultn      | =       | Missing     | 0.001065111  | 1933 |
| AST.resultn   | >= | 43          | PLT.resultn   | >= | 209.5       | TBILL.resultn      | <       | 2.2         | 0.001301802  | 1933 |
| AST.resultn   | >= | 43          | PLT.resultn   | >= | 209.5       | TBILL.resultn      | >=      | 2.2         | 0            | 1933 |
| TBILL.resultn | =  | Missing     |               |    |             |                    |         |             | -0.001485673 | 1934 |
| TBILL.resultn | <  | 2.05        | age.yrs       | =  | Missing     |                    |         |             | -0.00075209  | 1934 |
| TBILL.resultn | <  | 2.05        | age.yrs       | <  | 69.84257358 |                    |         |             | -0.000863664 | 1934 |
| TBILL.resultn | <  | 2.05        | age.yrs       | >= | 69.84257358 |                    |         |             | 0.001144672  | 1934 |
| TBILL.resultn | >= | 2.05        | PLT.resultn   | =  | Missing     |                    |         |             | 0.000411317  | 1934 |
| TBILL.resultn | >= | 2.05        | PLT.resultn   | <  | 254.5       |                    |         |             | 0.000754081  | 1934 |
| TBILL.resultn | >= | 2.05        | PLT.resultn   | >= | 254.5       |                    |         |             | 0            | 1934 |
| age.yrs       | =  | Missing     |               |    |             |                    |         | Missing     | -0.000979244 | 1935 |
| age.yrs       | <  | 49.10198494 |               |    |             |                    |         | Missing     | -0.001232343 | 1935 |
| age.yrs       | >= | 49.10198494 | TBILL.resultn | =  | Missing     |                    |         | Missing     | -0.000555636 | 1935 |
| age.yrs       | >= | 49.10198494 | TBILL.resultn | <  | 1.5         | TBILL.resultn      | =       | Missing     | -0.000755549 | 1935 |
| age.yrs       | >= | 49.10198494 | TBILL.resultn | <  | 1.5         | TBILL.resultn      | <       | 0.75        | -0.001723597 | 1935 |
| age.yrs       | >= | 49.10198494 | TBILL.resultn | <  | 1.5         | TBILL.resultn      | >=      | 0.75        | 0            | 1935 |
| age.yrs       | >= | 49.10198494 | TBILL.resultn | >= | 1.5         |                    |         | Missing     | 0.000302818  | 1935 |
| PLT.resultn   | =  | Missing     |               |    |             |                    |         | Missing     | -0.001071799 | 1936 |
| PLT.resultn   | <  | 249.5       | PLT.resultn   | =  | Missing     |                    |         | Missing     | -0.000520638 | 1936 |
| PLT.resultn   | <  | 249.5       | PLT.resultn   | <  | 238         | TBILL.resultn      | =       | Missing     | -0.00090011  | 1936 |
| PLT.resultn   | <  | 249.5       | PLT.resultn   | <  | 238         | TBILL.resultn      | <       | 1.65        | -0.001121876 | 1936 |
| PLT.resultn   | <  | 249.5       | PLT.resultn   | <  | 238         | TBILL.resultn      | >=      | 1.65        | 0            | 1936 |
| PLT.resultn   | >= | 249.5       |               |    |             |                    |         | Missing     | 0.001443687  | 1936 |
| AST.resultn   | =  | Missing     |               |    |             |                    |         | Missing     | -0.001580423 | 1936 |
| AST.resultn   | <  | 208.5       | PLT.resultn   | =  | Missing     |                    |         | Missing     | -0.002299977 | 1937 |
| AST.resultn   | <  | 208.5       | PLT.resultn   | <  | 204.5       | AST.resultn        | =       | Missing     | -0.00109241  | 1937 |
| AST.resultn   | <  | 208.5       | PLT.resultn   | <  | 204.5       | AST.resultn        | <       | 52.5        | -0.000981897 | 1937 |
| AST.resultn   | <  | 208.5       | PLT.resultn   | <  | 204.5       | AST.resultn        | >=      | 52.5        | -0.002291093 | 1937 |
| AST.resultn   | <  | 208.5       | PLT.resultn   | >= | 204.5       |                    |         | Missing     | 0            | 1937 |
| AST.resultn   | >= | 208.5       |               |    |             |                    |         | Missing     | -0.001685205 | 1937 |
| TBILL.resultn | =  | Missing     |               |    |             |                    |         | Missing     | 0.000174731  | 1937 |
| TBILL.resultn | <  | 2.75        | ALK.times.uln | =  | Missing     | ALB.resultn        | =       | Missing     | 0.001110515  | 1938 |
| TBILL.resultn | <  | 2.75        | ALK.times.uln | =  | Missing     | ALB.resultn        | <       | 3.95        | 0.000627094  | 1938 |
| TBILL.resultn | <  | 2.75        | ALK.times.uln | =  | Missing     | ALB.resultn        | >=      | 3.95        | 0            | 1938 |
| TBILL.resultn | <  | 2.75        | ALK.times.uln | <  | 6.115825908 |                    |         | Missing     | 0.000579123  | 1938 |
| TBILL.resultn | <  | 2.75        | ALK.times.uln | >= | 6.115825908 |                    |         | Missing     | 0.002259145  | 1938 |
| TBILL.resultn | >= | 2.75        |               |    |             |                    |         | Missing     | 0.000578582  | 1938 |
| TBILL.resultn | =  | Missing     |               |    |             |                    |         |             | 0.001158518  | 1939 |
| TBILL.resultn | <  | 1.95        | ALK.times.uln | =  | Missing     |                    |         |             | 0            | 1939 |
| TBILL.resultn | <  | 1.95        | ALK.times.uln | <  | 2.81254114  |                    |         |             | 2.19E-05     | 1939 |
| TBILL.resultn | <  | 1.95        | ALK.times.uln | >= | 2.81254114  |                    |         |             | 0.001190273  | 1939 |
| TBILL.resultn | >= | 1.95        | ALB.resultn   | =  | Missing     |                    |         |             | 0.001189333  | 1939 |
| TBILL.resultn | >= | 1.95        | ALB.resultn   | <  | 3.49        |                    |         |             | 0.001801067  | 1939 |
| TBILL.resultn | >= | 1.95        | ALB.resultn   | >= | 3.49        |                    |         |             | 0.00078151   | 1939 |
| ALB.resultn   | =  | Missing     |               |    |             |                    |         | Missing     | -0.000572643 | 1940 |
| ALB.resultn   | <  | 2.875       |               |    |             |                    |         | Missing     | 0.000473238  | 1940 |
| ALB.resultn   | >= | 2.875       | TBILL.resultn | =  | Missing     |                    |         | Missing     | -0.000479338 | 1940 |
| ALB.resultn   | >= | 2.875       | TBILL.resultn | <  | 3.75        | Hemoglobin.resultn | =       | Missing     | 0            | 1940 |

|               |    |             |                    |    |             |                    |         |         |              |      |
|---------------|----|-------------|--------------------|----|-------------|--------------------|---------|---------|--------------|------|
| ALB.resultn   | >= | 2.875       | TBILL.resultn      | <  | 3.75        | Hemoglobin.resultn | <       | 14.15   | 5.84E-05     | 1940 |
| ALB.resultn   | >= | 2.875       | TBILL.resultn      | <  | 3.75        | Hemoglobin.resultn | >=      | 14.15   | -0.001326092 | 1940 |
| ALB.resultn   | >= | 2.875       | TBILL.resultn      | >= | 3.75        |                    | Missing |         | -0.000658294 | 1940 |
| PLT.resultn   | =  | Missing     |                    |    |             |                    | Missing |         | -0.000575039 | 1941 |
| PLT.resultn   | <  | 171.5       |                    |    |             |                    | Missing |         | 0.001905535  | 1941 |
| PLT.resultn   | >= | 171.5       | PLT.resultn        | =  | Missing     |                    | Missing |         | -0.000945879 | 1941 |
| PLT.resultn   | >= | 171.5       | PLT.resultn        | <  | 417         | ALB.resultn        | =       | Missing | 0            | 1941 |
| PLT.resultn   | >= | 171.5       | PLT.resultn        | <  | 417         | ALB.resultn        | <       | 3.815   | -0.001614257 | 1941 |
| PLT.resultn   | >= | 171.5       | PLT.resultn        | <  | 417         | ALB.resultn        | >=      | 3.815   | -0.000995768 | 1941 |
| PLT.resultn   | >= | 171.5       | PLT.resultn        | >= | 417         |                    | Missing |         | 0.000490663  | 1941 |
| TBILL.resultn | =  | Missing     |                    |    |             |                    | Missing |         | 0.001491237  | 1942 |
| TBILL.resultn | <  | 3.5         | PLT.resultn        | =  | Missing     |                    | Missing |         | 0.001429507  | 1942 |
| TBILL.resultn | <  | 3.5         | PLT.resultn        | <  | 238         |                    | Missing |         | -2.57E-05    | 1942 |
| TBILL.resultn | <  | 3.5         | PLT.resultn        | >= | 238         | PLT.resultn        | =       | Missing | 0.000526011  | 1942 |
| TBILL.resultn | <  | 3.5         | PLT.resultn        | >= | 238         | PLT.resultn        | <       | 250     | 0.003349859  | 1942 |
| TBILL.resultn | <  | 3.5         | PLT.resultn        | >= | 238         | PLT.resultn        | >=      | 250     | 0            | 1942 |
| TBILL.resultn | >= | 3.5         |                    |    |             |                    | Missing |         | 0.001382094  | 1942 |
| psc.yrs.dur   | =  | Missing     |                    |    |             |                    | Missing |         | 5.41E-05     | 1943 |
| psc.yrs.dur   | <  | 15.25941136 | AST.resultn        | =  | Missing     |                    | Missing |         | -5.28E-05    | 1943 |
| psc.yrs.dur   | <  | 15.25941136 | AST.resultn        | <  | 123.5       | Sodium.resultn     | =       | Missing | 0            | 1943 |
| psc.yrs.dur   | <  | 15.25941136 | AST.resultn        | <  | 123.5       | Sodium.resultn     | <       | 136.5   | 0.001146939  | 1943 |
| psc.yrs.dur   | <  | 15.25941136 | AST.resultn        | <  | 123.5       | Sodium.resultn     | >=      | 136.5   | -1.56E-05    | 1943 |
| psc.yrs.dur   | <  | 15.25941136 | AST.resultn        | >= | 123.5       |                    | Missing |         | -0.000665576 | 1943 |
| psc.yrs.dur   | >= | 15.25941136 |                    |    |             |                    | Missing |         | 0.002662138  | 1943 |
| AST.resultn   | =  | Missing     |                    |    |             |                    | Missing |         | -0.003717719 | 1944 |
| AST.resultn   | <  | 43.5        |                    |    |             |                    | Missing |         | -0.003707436 | 1944 |
| AST.resultn   | >= | 43.5        | AST.resultn        | =  | Missing     |                    | Missing |         | -0.002155682 | 1944 |
| AST.resultn   | >= | 43.5        | AST.resultn        | <  | 73          | TBILL.resultn      | =       | Missing | -0.000944707 | 1944 |
| AST.resultn   | >= | 43.5        | AST.resultn        | <  | 73          | TBILL.resultn      | <       | 0.55    | -0.003011255 | 1944 |
| AST.resultn   | >= | 43.5        | AST.resultn        | <  | 73          | TBILL.resultn      | >=      | 0.55    | 0            | 1944 |
| AST.resultn   | >= | 43.5        | AST.resultn        | >= | 73          |                    | Missing |         | -0.002890431 | 1944 |
| ALK.times.uln | =  | Missing     |                    |    |             |                    | Missing |         | 0.000720861  | 1945 |
| ALK.times.uln | <  | 6.02        | TBILL.resultn      | =  | Missing     |                    | Missing |         | 0.000661069  | 1945 |
| ALK.times.uln | <  | 6.02        | TBILL.resultn      | <  | 1.05        | Sodium.resultn     | =       | Missing | 0            | 1945 |
| ALK.times.uln | <  | 6.02        | TBILL.resultn      | <  | 1.05        | Sodium.resultn     | <       | 137.5   | 0.003608392  | 1945 |
| ALK.times.uln | <  | 6.02        | TBILL.resultn      | <  | 1.05        | Sodium.resultn     | >=      | 137.5   | 0.000579196  | 1945 |
| ALK.times.uln | <  | 6.02        | TBILL.resultn      | >= | 1.05        |                    | Missing |         | 0.000392275  | 1945 |
| ALK.times.uln | >= | 6.02        |                    |    |             |                    | Missing |         | 0.002034643  | 1945 |
| ALK.times.uln | =  | Missing     | TBILL.resultn      | =  | Missing     |                    |         |         | -0.000968215 | 1946 |
| ALK.times.uln | =  | Missing     | TBILL.resultn      | <  | 1.26        |                    |         |         | -0.001494553 | 1946 |
| ALK.times.uln | =  | Missing     | TBILL.resultn      | >= | 1.26        |                    |         |         | 0.001041442  | 1946 |
| ALK.times.uln | <  | 4.959168023 |                    |    |             |                    |         |         | -0.001688344 | 1946 |
| ALK.times.uln | >= | 4.959168023 | Sodium.resultn     | =  | Missing     |                    |         |         | -0.000193831 | 1946 |
| ALK.times.uln | >= | 4.959168023 | Sodium.resultn     | <  | 139.5       |                    |         |         | -0.000387662 | 1946 |
| ALK.times.uln | >= | 4.959168023 | Sodium.resultn     | >= | 139.5       |                    |         |         | 0            | 1946 |
| ALB.resultn   | =  | Missing     |                    |    |             |                    | Missing |         | -0.000997143 | 1947 |
| ALB.resultn   | <  | 2.95        |                    |    |             |                    | Missing |         | 2.02E-05     | 1947 |
| ALB.resultn   | >= | 2.95        | TBILL.resultn      | =  | Missing     |                    | Missing |         | -0.00122869  | 1947 |
| ALB.resultn   | >= | 2.95        | TBILL.resultn      | <  | 2.65        | TBILL.resultn      | =       | Missing | -0.001228212 | 1947 |
| ALB.resultn   | >= | 2.95        | TBILL.resultn      | <  | 2.65        | TBILL.resultn      | <       | 1.05    | -0.001629588 | 1947 |
| ALB.resultn   | >= | 2.95        | TBILL.resultn      | <  | 2.65        | TBILL.resultn      | >=      | 1.05    | 0            | 1947 |
| ALB.resultn   | >= | 2.95        | TBILL.resultn      | >= | 2.65        |                    | Missing |         | -0.001235161 | 1947 |
| TBILL.resultn | =  | Missing     |                    |    |             |                    |         |         | -0.000821482 | 1948 |
| TBILL.resultn | <  | 2.35        | Hemoglobin.resultn | =  | Missing     |                    |         |         | 0            | 1948 |
| TBILL.resultn | <  | 2.35        | Hemoglobin.resultn | <  | 13.75       |                    |         |         | 0.000751813  | 1948 |
| TBILL.resultn | <  | 2.35        | Hemoglobin.resultn | >= | 13.75       |                    |         |         | -0.000819296 | 1948 |
| TBILL.resultn | >= | 2.35        | PLT.resultn        | =  | Missing     |                    |         |         | 0.000573503  | 1948 |
| TBILL.resultn | >= | 2.35        | PLT.resultn        | <  | 229.5       |                    |         |         | 0.001244088  | 1948 |
| TBILL.resultn | >= | 2.35        | PLT.resultn        | >= | 229.5       |                    |         |         | 5.77E-05     | 1948 |
| PLT.resultn   | =  | Missing     | psc.yrs.dur        | =  | Missing     |                    |         |         | 0.000414526  | 1949 |
| PLT.resultn   | =  | Missing     | psc.yrs.dur        | <  | 0.280629706 |                    |         |         | -0.001446808 | 1949 |
| PLT.resultn   | =  | Missing     | psc.yrs.dur        | >= | 0.280629706 |                    |         |         | 0.00215177   | 1949 |

|               |    |                          |    |                         |    |         |  |              |      |
|---------------|----|--------------------------|----|-------------------------|----|---------|--|--------------|------|
| PLT.resultn   | <  | 185.5                    |    |                         |    |         |  | 0.000394551  | 1949 |
| PLT.resultn   | >= | 185.5 Hemoglobin.resultn | =  | Missing                 |    |         |  | 0            | 1949 |
| PLT.resultn   | >= | 185.5 Hemoglobin.resultn | <  | 12.95                   |    |         |  | -0.001098443 | 1949 |
| PLT.resultn   | >= | 185.5 Hemoglobin.resultn | >= | 12.95                   |    |         |  | -0.000431682 | 1949 |
| ALK.times.uln | =  | Missing                  |    |                         |    | Missing |  | 9.39E-05     | 1950 |
| ALK.times.uln | <  | 2.81254114               |    |                         |    | Missing |  | -0.000210069 | 1950 |
| ALK.times.uln | >= | 2.81254114 AST.resultn   | =  | Missing                 |    | Missing |  | 0.002884935  | 1950 |
| ALK.times.uln | >= | 2.81254114 AST.resultn   | <  | 69.5                    |    | Missing |  | 0.013500909  | 1950 |
| ALK.times.uln | >= | 2.81254114 AST.resultn   | >= | 69.5 PLT.resultn        | =  | Missing |  | 0.00052583   | 1950 |
| ALK.times.uln | >= | 2.81254114 AST.resultn   | >= | 69.5 PLT.resultn        | <  | 211.5   |  | 0.002155901  | 1950 |
| ALK.times.uln | >= | 2.81254114 AST.resultn   | >= | 69.5 PLT.resultn        | >= | 211.5   |  | 0            | 1950 |
| ALK.times.uln | =  | Missing ALB.resultn      | =  | Missing                 |    | Missing |  | -0.001503652 | 1951 |
| ALK.times.uln | =  | Missing ALB.resultn      | <  | 3.95 TBILL.resultn      | =  | Missing |  | -0.000120056 | 1951 |
| ALK.times.uln | =  | Missing ALB.resultn      | <  | 3.95 TBILL.resultn      | <  | 0.95    |  | -0.000240111 | 1951 |
| ALK.times.uln | =  | Missing ALB.resultn      | <  | 3.95 TBILL.resultn      | >= | 0.95    |  | 0            | 1951 |
| ALK.times.uln | =  | Missing ALB.resultn      | >= | 3.95                    |    | Missing |  | -0.001494082 | 1951 |
| ALK.times.uln | <  | 5.951330827              |    |                         |    | Missing |  | -0.000753751 | 1951 |
| ALK.times.uln | >= | 5.951330827              |    |                         |    | Missing |  | 0.000175599  | 1951 |
| ALB.resultn   | =  | Missing                  |    |                         |    | Missing |  | -0.00246677  | 1952 |
| ALB.resultn   | <  | 2.965                    |    |                         |    | Missing |  | -0.001562198 | 1952 |
| ALB.resultn   | >= | 2.965 psc.yrs.dur        | =  | Missing                 |    | Missing |  | -0.003413307 | 1952 |
| ALB.resultn   | >= | 2.965 psc.yrs.dur        | <  | 6.410677618             |    | Missing |  | -0.003671504 | 1952 |
| ALB.resultn   | >= | 2.965 psc.yrs.dur        | >= | 6.410677618 PLT.resultn | =  | Missing |  | -0.001803884 | 1952 |
| ALB.resultn   | >= | 2.965 psc.yrs.dur        | >= | 6.410677618 PLT.resultn | <  | 244     |  | -0.003156797 | 1952 |
| ALB.resultn   | >= | 2.965 psc.yrs.dur        | >= | 6.410677618 PLT.resultn | >= | 244     |  | 0            | 1952 |
| ALB.resultn   | =  | Missing                  |    |                         |    |         |  | -0.00078641  | 1953 |
| ALB.resultn   | <  | 3.31 TBILL.resultn       | =  | Missing                 |    |         |  | 0.000550409  | 1953 |
| ALB.resultn   | <  | 3.31 TBILL.resultn       | <  | 1.31                    |    |         |  | -0.000768697 | 1953 |
| ALB.resultn   | <  | 3.31 TBILL.resultn       | >= | 1.31                    |    |         |  | 0.002072454  | 1953 |
| ALB.resultn   | >= | 3.31 ALK.times.uln       | =  | Missing                 |    |         |  | 0            | 1953 |
| ALB.resultn   | >= | 3.31 ALK.times.uln       | <  | 5.462893197             |    |         |  | -0.000662466 | 1953 |
| ALB.resultn   | >= | 3.31 ALK.times.uln       | >= | 5.462893197             |    |         |  | 0.000734806  | 1953 |
| AST.resultn   | =  | Missing                  |    |                         |    | Missing |  | -0.000690808 | 1954 |
| AST.resultn   | <  | 47.5                     |    |                         |    | Missing |  | -0.0006924   | 1954 |
| AST.resultn   | >= | 47.5 AST.resultn         | =  | Missing                 |    | Missing |  | 0.000551009  | 1954 |
| AST.resultn   | >= | 47.5 AST.resultn         | <  | 65.5                    |    | Missing |  | 0.002282009  | 1954 |
| AST.resultn   | >= | 47.5 AST.resultn         | >= | 65.5 ALB.resultn        | =  | Missing |  | 0.000118259  | 1954 |
| AST.resultn   | >= | 47.5 AST.resultn         | >= | 65.5 ALB.resultn        | <  | 3.31    |  | 0.001139582  | 1954 |
| AST.resultn   | >= | 47.5 AST.resultn         | >= | 65.5 ALB.resultn        | >= | 3.31    |  | 0            | 1954 |
| ALB.resultn   | =  | Missing                  |    |                         |    | Missing |  | -0.002136679 | 1955 |
| ALB.resultn   | <  | 2.95                     |    |                         |    | Missing |  | 2.32E-06     | 1955 |
| ALB.resultn   | >= | 2.95 TBILL.resultn       | =  | Missing                 |    | Missing |  | -0.001779914 | 1955 |
| ALB.resultn   | >= | 2.95 TBILL.resultn       | <  | 0.95                    |    | Missing |  | -0.002154203 | 1955 |
| ALB.resultn   | >= | 2.95 TBILL.resultn       | >= | 0.95 Hemoglobin.resultn | =  | Missing |  | 0            | 1955 |
| ALB.resultn   | >= | 2.95 TBILL.resultn       | >= | 0.95 Hemoglobin.resultn | <  | 13.25   |  | -0.00034204  | 1955 |
| ALB.resultn   | >= | 2.95 TBILL.resultn       | >= | 0.95 Hemoglobin.resultn | >= | 13.25   |  | -0.001827715 | 1955 |
| ALB.resultn   | =  | Missing                  |    |                         |    | Missing |  | -0.001403563 | 1956 |
| ALB.resultn   | <  | 3.03                     |    |                         |    | Missing |  | 0.000352033  | 1956 |
| ALB.resultn   | >= | 3.03 TBILL.resultn       | =  | Missing                 |    | Missing |  | -0.001254287 | 1956 |
| ALB.resultn   | >= | 3.03 TBILL.resultn       | <  | 2.75 TBILL.resultn      | =  | Missing |  | -0.001238334 | 1956 |
| ALB.resultn   | >= | 3.03 TBILL.resultn       | <  | 2.75 TBILL.resultn      | <  | 0.95    |  | -0.001711308 | 1956 |
| ALB.resultn   | >= | 3.03 TBILL.resultn       | <  | 2.75 TBILL.resultn      | >= | 0.95    |  | 0            | 1956 |
| ALB.resultn   | >= | 3.03 TBILL.resultn       | >= | 2.75                    |    | Missing |  | -0.001542907 | 1956 |
| PLT.resultn   | =  | Missing                  |    |                         |    | Missing |  | -0.00156196  | 1957 |
| PLT.resultn   | <  | 170                      |    |                         |    | Missing |  | 0.001486418  | 1957 |
| PLT.resultn   | >= | 170 age.yrs              | =  | Missing                 |    | Missing |  | -0.00175057  | 1957 |
| PLT.resultn   | >= | 170 age.yrs              | <  | 51.9945243              |    | Missing |  | -0.002013502 | 1957 |
| PLT.resultn   | >= | 170 age.yrs              | >= | 51.9945243 AST.resultn  | =  | Missing |  | -0.001260238 | 1957 |
| PLT.resultn   | >= | 170 age.yrs              | >= | 51.9945243 AST.resultn  | <  | 57      |  | -0.002110166 | 1957 |
| PLT.resultn   | >= | 170 age.yrs              | >= | 51.9945243 AST.resultn  | >= | 57      |  | 0            | 1957 |
| TBILL.resultn | =  | Missing                  |    |                         |    |         |  | 0.000421415  | 1958 |
| TBILL.resultn | <  | 2.05 Sodium.resultn      | =  | Missing                 |    |         |  | 0            | 1958 |

|                    |    |             |                    |    |             |             |              |              |              |      |
|--------------------|----|-------------|--------------------|----|-------------|-------------|--------------|--------------|--------------|------|
| TBILL.resultn      | <  | 2.05        | Sodium.resultn     | <  | 137.5       |             | 0.001207698  | 1958         |              |      |
| TBILL.resultn      | <  | 2.05        | Sodium.resultn     | >= | 137.5       |             | -0.000646715 | 1958         |              |      |
| TBILL.resultn      | >= | 2.05        | Hemoglobin.resultn | =  | Missing     |             | -4.70E-06    | 1958         |              |      |
| TBILL.resultn      | >= | 2.05        | Hemoglobin.resultn | <  | 12.75       |             | 0.000861412  | 1958         |              |      |
| TBILL.resultn      | >= | 2.05        | Hemoglobin.resultn | >= | 12.75       |             | -0.000870819 | 1958         |              |      |
| Sodium.resultn     | =  | Missing     |                    |    |             | Missing     | -0.001066708 | 1959         |              |      |
| Sodium.resultn     | <  | 141.5       | TBILL.resultn      | =  | Missing     | Missing     | -0.000777976 | 1959         |              |      |
| Sodium.resultn     | <  | 141.5       | TBILL.resultn      | <  | 3.3 age.yrs | =           | Missing      | -0.0009303   | 1959         |      |
| Sodium.resultn     | <  | 141.5       | TBILL.resultn      | <  | 3.3 age.yrs | <           | 48.98425736  | -0.001540809 | 1959         |      |
| Sodium.resultn     | <  | 141.5       | TBILL.resultn      | <  | 3.3 age.yrs | >=          | 48.98425736  | 0            | 1959         |      |
| Sodium.resultn     | <  | 141.5       | TBILL.resultn      | >= | 3.3         | Missing     | 0.000836656  | 1959         |              |      |
| Sodium.resultn     | >= | 141.5       |                    |    |             | Missing     | -0.001435615 | 1959         |              |      |
| age.yrs            | =  | Missing     |                    |    |             |             | 0.000837236  | 1960         |              |      |
| age.yrs            | <  | 62.47912389 | ALB.resultn        | =  | Missing     |             | 0            | 1960         |              |      |
| age.yrs            | <  | 62.47912389 | ALB.resultn        | <  | 3.03        |             | 0.001857318  | 1960         |              |      |
| age.yrs            | <  | 62.47912389 | ALB.resultn        | >= | 3.03        |             | 0.000635578  | 1960         |              |      |
| age.yrs            | >= | 62.47912389 | AST.resultn        | =  | Missing     |             | 0.002733563  | 1960         |              |      |
| age.yrs            | >= | 62.47912389 | AST.resultn        | <  | 51.5        |             | 8.65E-05     | 1960         |              |      |
| age.yrs            | >= | 62.47912389 | AST.resultn        | >= | 51.5        |             | 0.005601207  | 1960         |              |      |
| AST.resultn        | =  | Missing     |                    |    |             | Missing     | -0.001964928 | 1961         |              |      |
| AST.resultn        | <  | 213.5       | age.yrs            | =  | Missing     | Missing     | -0.001247305 | 1961         |              |      |
| AST.resultn        | <  | 213.5       | age.yrs            | >= | 53.33470226 | Missing     | -0.001364204 | 1961         |              |      |
| AST.resultn        | <  | 213.5       | age.yrs            | >= | 53.33470226 | AST.resultn | =            | Missing      | -0.000976767 | 1961 |
| AST.resultn        | <  | 213.5       | age.yrs            | >= | 53.33470226 | AST.resultn | <            | 51           | -0.001953534 | 1961 |
| AST.resultn        | <  | 213.5       | age.yrs            | >= | 53.33470226 | AST.resultn | >=           | 51           | 0            | 1961 |
| AST.resultn        | >= | 213.5       |                    |    |             | Missing     | 0.000576631  | 1961         |              |      |
| ALK.times.uln      | =  | Missing     | psc.yrs.dur        | =  | Missing     |             | -0.000408487 | 1962         |              |      |
| ALK.times.uln      | =  | Missing     | psc.yrs.dur        | <  | 0.399726215 |             | -0.001072279 | 1962         |              |      |
| ALK.times.uln      | =  | Missing     | psc.yrs.dur        | >= | 0.399726215 |             | 0            | 1962         |              |      |
| ALK.times.uln      | <  | 5.446215139 | age.yrs            | =  | Missing     |             | -0.000600521 | 1962         |              |      |
| ALK.times.uln      | <  | 5.446215139 | age.yrs            | <  | 69.76043806 |             | -0.000806074 | 1962         |              |      |
| ALK.times.uln      | <  | 5.446215139 | age.yrs            | >= | 69.76043806 |             | 0.002749987  | 1962         |              |      |
| ALK.times.uln      | >= | 5.446215139 |                    |    |             |             | 0.000229953  | 1962         |              |      |
| Hemoglobin.resultn | =  | Missing     | ALB.resultn        | =  | Missing     |             | 0.001077481  | 1963         |              |      |
| Hemoglobin.resultn | =  | Missing     | ALB.resultn        | <  | 3.95        |             | 0.002597482  | 1963         |              |      |
| Hemoglobin.resultn | =  | Missing     | ALB.resultn        | >= | 3.95        |             | 0.000202328  | 1963         |              |      |
| Hemoglobin.resultn | <  | 13.15       |                    |    |             |             | 0.000318592  | 1963         |              |      |
| Hemoglobin.resultn | >= | 13.15       | Hemoglobin.resultn | =  | Missing     |             | 0.000835547  | 1963         |              |      |
| Hemoglobin.resultn | >= | 13.15       | Hemoglobin.resultn | <  | 13.85       |             | 0.003557815  | 1963         |              |      |
| Hemoglobin.resultn | >= | 13.15       | Hemoglobin.resultn | >= | 13.85       |             | 0            | 1963         |              |      |
| ALB.resultn        | =  | Missing     |                    |    |             | Missing     | -0.001544784 | 1964         |              |      |
| ALB.resultn        | <  | 2.965       |                    |    |             | Missing     | -0.000269801 | 1964         |              |      |
| ALB.resultn        | >= | 2.965       | PLT.resultn        | =  | Missing     | Missing     | -0.001342999 | 1964         |              |      |
| ALB.resultn        | >= | 2.965       | PLT.resultn        | <  | 205.5       | AST.resultn | =            | Missing      | -0.001285852 | 1964 |
| ALB.resultn        | >= | 2.965       | PLT.resultn        | <  | 205.5       | AST.resultn | <            | 51.5         | -0.002410972 | 1964 |
| ALB.resultn        | >= | 2.965       | PLT.resultn        | <  | 205.5       | AST.resultn | >=           | 51.5         | 0            | 1964 |
| ALB.resultn        | >= | 2.965       | PLT.resultn        | >= | 205.5       |             | Missing      | -0.002093735 | 1964         |      |
| age.yrs            | =  | Missing     |                    |    |             | Missing     | -0.002407915 | 1965         |              |      |
| age.yrs            | <  | 51.58521561 |                    |    |             | Missing     | -0.002477657 | 1965         |              |      |
| age.yrs            | >= | 51.58521561 | AST.resultn        | =  | Missing     | Missing     | -0.002231623 | 1965         |              |      |
| age.yrs            | >= | 51.58521561 | AST.resultn        | <  | 58.5        | Missing     | -0.002948313 | 1965         |              |      |
| age.yrs            | >= | 51.58521561 | AST.resultn        | >= | 58.5        | psc.yrs.dur | =            | Missing      | -0.001218373 | 1965 |
| age.yrs            | >= | 51.58521561 | AST.resultn        | >= | 58.5        | psc.yrs.dur | <            | 0.73100616   | -0.002944401 | 1965 |
| age.yrs            | >= | 51.58521561 | AST.resultn        | >= | 58.5        | psc.yrs.dur | >=           | 0.73100616   | 0            | 1965 |
| ALK.times.uln      | =  | Missing     | TBILL.resultn      | =  | Missing     |             | 0            | 1966         |              |      |
| ALK.times.uln      | =  | Missing     | TBILL.resultn      | <  | 1.15        |             | 2.56E-05     | 1966         |              |      |
| ALK.times.uln      | =  | Missing     | TBILL.resultn      | >= | 1.15        |             | 0.002693905  | 1966         |              |      |
| ALK.times.uln      | <  | 7.069499779 | TBILL.resultn      | =  | Missing     |             | 0.00117505   | 1966         |              |      |
| ALK.times.uln      | <  | 7.069499779 | TBILL.resultn      | <  | 1.15        |             | 0.001408103  | 1966         |              |      |
| ALK.times.uln      | <  | 7.069499779 | TBILL.resultn      | >= | 1.15        |             | 0.000497569  | 1966         |              |      |
| ALK.times.uln      | >= | 7.069499779 |                    |    |             |             | 0.000463107  | 1966         |              |      |
| PLT.resultn        | =  | Missing     |                    |    |             | Missing     | 0.000596013  | 1967         |              |      |

|               |    |             |                    |    |             |                |             |              |              |      |
|---------------|----|-------------|--------------------|----|-------------|----------------|-------------|--------------|--------------|------|
| PLT.resultn   | <  | 170         |                    |    |             | Missing        | 0.002583219 | 1967         |              |      |
| PLT.resultn   | >= | 170         | TBILL.resultn      | =  | Missing     | Missing        | 0.000419744 | 1967         |              |      |
| PLT.resultn   | >= | 170         | TBILL.resultn      | <  | 2.75        | Sodium.resultn | =           | Missing      | 0            | 1967 |
| PLT.resultn   | >= | 170         | TBILL.resultn      | <  | 2.75        | Sodium.resultn | <           | 136.5        | 0.001614476  | 1967 |
| PLT.resultn   | >= | 170         | TBILL.resultn      | <  | 2.75        | Sodium.resultn | >=          | 136.5        | 0.000505957  | 1967 |
| PLT.resultn   | >= | 170         | TBILL.resultn      | >= | 2.75        |                | Missing     | 4.90E-05     |              | 1967 |
| age.yrs       | =  | Missing     |                    |    |             | Missing        | Missing     | -0.001914537 |              | 1968 |
| age.yrs       | <  | 69.84257358 | PLT.resultn        | =  | Missing     | Missing        | Missing     | -0.002770008 |              | 1968 |
| age.yrs       | <  | 69.84257358 | PLT.resultn        | <  | 197.5       | TBILL.resultn  | =           | Missing      | -0.001200688 | 1968 |
| age.yrs       | <  | 69.84257358 | PLT.resultn        | <  | 197.5       | TBILL.resultn  | <           | 1.45         | -0.001861067 | 1968 |
| age.yrs       | <  | 69.84257358 | PLT.resultn        | <  | 197.5       | TBILL.resultn  | >=          | 1.45         | 0            | 1968 |
| age.yrs       | <  | 69.84257358 | PLT.resultn        | >= | 197.5       |                | Missing     | -0.00202672  |              | 1968 |
| age.yrs       | >= | 69.84257358 |                    |    |             | Missing        | Missing     | -7.35E-06    |              | 1968 |
| ALK.times.uln | =  | Missing     | age.yrs            | =  | Missing     |                |             | 0.000769297  |              | 1969 |
| ALK.times.uln | =  | Missing     | age.yrs            | <  | 56.56125941 |                |             | 0.000965392  |              | 1969 |
| ALK.times.uln | =  | Missing     | age.yrs            | >= | 56.56125941 |                |             | 0            |              | 1969 |
| ALK.times.uln | <  | 6.02173913  | age.yrs            | =  | Missing     |                |             | 0.000435872  |              | 1969 |
| ALK.times.uln | <  | 6.02173913  | age.yrs            | <  | 68.5174538  |                |             | 0.000125089  |              | 1969 |
| ALK.times.uln | <  | 6.02173913  | age.yrs            | >= | 68.5174538  |                |             | 0.005501639  |              | 1969 |
| ALK.times.uln | >= | 6.02173913  |                    |    |             |                |             | 0.00151261   |              | 1969 |
| TBILL.resultn | =  | Missing     |                    |    |             | Missing        | Missing     | -0.002643388 |              | 1970 |
| TBILL.resultn | <  | 0.95        |                    |    |             | Missing        | Missing     | -0.002497065 |              | 1970 |
| TBILL.resultn | >= | 0.95        | Sodium.resultn     | =  | Missing     | Missing        | Missing     | -0.001040826 |              | 1970 |
| TBILL.resultn | >= | 0.95        | Sodium.resultn     | <  | 141.5       | ALK.times.uln  | =           | Missing      | -0.000799853 | 1970 |
| TBILL.resultn | >= | 0.95        | Sodium.resultn     | <  | 141.5       | ALK.times.uln  | <           | 2.781735492  | -0.00177745  | 1970 |
| TBILL.resultn | >= | 0.95        | Sodium.resultn     | <  | 141.5       | ALK.times.uln  | >=          | 2.781735492  | 0            | 1970 |
| TBILL.resultn | >= | 0.95        | Sodium.resultn     | >= | 141.5       |                | Missing     | -0.002203681 |              | 1970 |
| PLT.resultn   | =  | Missing     |                    |    |             |                |             | -0.002315099 |              | 1971 |
| PLT.resultn   | <  | 204.5       | ALK.times.uln      | =  | Missing     |                |             | -0.000931134 |              | 1971 |
| PLT.resultn   | <  | 204.5       | ALK.times.uln      | <  | 2.463695652 |                |             | -0.002292014 |              | 1971 |
| PLT.resultn   | <  | 204.5       | ALK.times.uln      | >= | 2.463695652 |                |             | 0.00151845   |              | 1971 |
| PLT.resultn   | >= | 204.5       | age.yrs            | =  | Missing     |                |             | -0.001657816 |              | 1971 |
| PLT.resultn   | >= | 204.5       | age.yrs            | <  | 53.28405202 |                |             | -0.002075015 |              | 1971 |
| PLT.resultn   | >= | 204.5       | age.yrs            | >= | 53.28405202 |                |             | 0            |              | 1971 |
| psc.yrs.dur   | =  | Missing     |                    |    |             |                |             | 0.000837201  |              | 1972 |
| psc.yrs.dur   | <  | 6.324435318 | AST.resultn        | =  | Missing     |                |             | 0            |              | 1972 |
| psc.yrs.dur   | <  | 6.324435318 | AST.resultn        | <  | 141         |                |             | 0.000881024  |              | 1972 |
| psc.yrs.dur   | <  | 6.324435318 | AST.resultn        | >= | 141         |                |             | 0.00017167   |              | 1972 |
| psc.yrs.dur   | >= | 6.324435318 | AST.resultn        | =  | Missing     |                |             | 0.001330796  |              | 1972 |
| psc.yrs.dur   | >= | 6.324435318 | AST.resultn        | <  | 42.5        |                |             | -1.71E-05    |              | 1972 |
| psc.yrs.dur   | >= | 6.324435318 | AST.resultn        | >= | 42.5        |                |             | 0.002903295  |              | 1972 |
| PLT.resultn   | =  | Missing     |                    |    |             | Missing        | Missing     | -0.00367855  |              | 1973 |
| PLT.resultn   | <  | 185.5       |                    |    |             | Missing        | Missing     | -0.002341491 |              | 1973 |
| PLT.resultn   | >= | 185.5       | ALK.times.uln      | =  | Missing     | Missing        | Missing     | -0.004657882 |              | 1973 |
| PLT.resultn   | >= | 185.5       | ALK.times.uln      | <  | 6.02        | age.yrs        | =           | Missing      | -0.00401408  | 1973 |
| PLT.resultn   | >= | 185.5       | ALK.times.uln      | <  | 6.02        | age.yrs        | <           | 67.45653662  | -0.00431589  | 1973 |
| PLT.resultn   | >= | 185.5       | ALK.times.uln      | <  | 6.02        | age.yrs        | >=          | 67.45653662  | 0            | 1973 |
| PLT.resultn   | >= | 185.5       | ALK.times.uln      | >= | 6.02        |                | Missing     | -0.003003773 |              | 1973 |
| TBILL.resultn | =  | Missing     |                    |    |             |                |             | 0.002229984  |              | 1974 |
| TBILL.resultn | <  | 1.65        | ALK.times.uln      | =  | Missing     |                |             | 0            |              | 1974 |
| TBILL.resultn | <  | 1.65        | ALK.times.uln      | <  | 2.85059761  |                |             | -0.000450063 |              | 1974 |
| TBILL.resultn | <  | 1.65        | ALK.times.uln      | >= | 2.85059761  |                |             | 0.001218677  |              | 1974 |
| TBILL.resultn | >= | 1.65        | Hemoglobin.resultn | =  | Missing     |                |             | 0.001092113  |              | 1974 |
| TBILL.resultn | >= | 1.65        | Hemoglobin.resultn | <  | 12.75       |                |             | 0.001596925  |              | 1974 |
| TBILL.resultn | >= | 1.65        | Hemoglobin.resultn | >= | 12.75       |                |             | 0.000688265  |              | 1974 |
| ALK.times.uln | =  | Missing     | TBILL.resultn      | =  | Missing     |                |             | -0.000862639 |              | 1975 |
| ALK.times.uln | =  | Missing     | TBILL.resultn      | <  | 1.15        |                |             | -0.001487419 |              | 1975 |
| ALK.times.uln | =  | Missing     | TBILL.resultn      | >= | 1.15        |                |             | 0.000699312  |              | 1975 |
| ALK.times.uln | <  | 4.883584738 | TBILL.resultn      | =  | Missing     |                |             | -0.000493739 |              | 1975 |
| ALK.times.uln | <  | 4.883584738 | TBILL.resultn      | <  | 0.65        |                |             | -0.001490194 |              | 1975 |
| ALK.times.uln | <  | 4.883584738 | TBILL.resultn      | >= | 0.65        |                |             | 0            |              | 1975 |
| ALK.times.uln | >= | 4.883584738 |                    |    |             |                |             | -0.001015396 |              | 1975 |



|                    |    |             |                    |    |         |               |    |              |              |      |
|--------------------|----|-------------|--------------------|----|---------|---------------|----|--------------|--------------|------|
| Hemoglobin.resultn | =  | Missing     | ALB.resultn        | =  | Missing |               |    | -0.000603329 | 1976         |      |
| Hemoglobin.resultn | =  | Missing     | ALB.resultn        | <  | 3.95    |               |    | 0.001913248  | 1976         |      |
| Hemoglobin.resultn | =  | Missing     | ALB.resultn        | >= | 3.95    |               |    | 0.000288819  | 1976         |      |
| Hemoglobin.resultn | <  | 11.55       | TBILL.resultn      | =  | Missing |               |    | 0.000847031  | 1976         |      |
| Hemoglobin.resultn | <  | 11.55       | TBILL.resultn      | <  | 0.95    |               |    | 0.001694062  | 1976         |      |
| Hemoglobin.resultn | <  | 11.55       | TBILL.resultn      | >= | 0.95    |               |    | 0            | 1976         |      |
| Hemoglobin.resultn | >= | 11.55       |                    |    |         |               |    | 8.43E-05     | 1976         |      |
| ALB.resultn        | =  | Missing     |                    |    |         | Missing       |    | -0.001182865 | 1977         |      |
| ALB.resultn        | <  | 3.615       | PLT.resultn        | =  | Missing | Missing       |    | -0.000963714 | 1977         |      |
| ALB.resultn        | <  | 3.615       | PLT.resultn        | <  | 218     | Missing       |    | 0.000595429  | 1977         |      |
| ALB.resultn        | <  | 3.615       | PLT.resultn        | >= | 218     | ALK.times.uln | =  | Missing      | -0.001420048 | 1977 |
| ALB.resultn        | <  | 3.615       | PLT.resultn        | >= | 218     | ALK.times.uln | <  | 5.619495541  | -0.001977925 | 1977 |
| ALB.resultn        | <  | 3.615       | PLT.resultn        | >= | 218     | ALK.times.uln | >= | 5.619495541  | 0            | 1977 |
| ALB.resultn        | >= | 3.615       |                    |    |         | Missing       |    | -0.00137273  | 1977         |      |
| TBILL.resultn      | =  | Missing     |                    |    |         | Missing       |    | -0.000889342 | 1978         |      |
| TBILL.resultn      | <  | 0.95        |                    |    |         | Missing       |    | -0.001546023 | 1978         |      |
| TBILL.resultn      | >= | 0.95        | Hemoglobin.resultn | =  | Missing | ALB.resultn   | =  | Missing      | 0.000382035  | 1978 |
| TBILL.resultn      | >= | 0.95        | Hemoglobin.resultn | =  | Missing | ALB.resultn   | <  | 3.95         | 0.000764071  | 1978 |
| TBILL.resultn      | >= | 0.95        | Hemoglobin.resultn | =  | Missing | ALB.resultn   | >= | 3.95         | 0            | 1978 |
| TBILL.resultn      | >= | 0.95        | Hemoglobin.resultn | <  | 14.95   | Missing       |    | -0.000302842 | 1978         |      |
| TBILL.resultn      | >= | 0.95        | Hemoglobin.resultn | >= | 14.95   | Missing       |    | -0.00178964  | 1978         |      |
| psc.yrs.dur        | =  | Missing     |                    |    |         |               |    | -0.001716053 | 1979         |      |
| psc.yrs.dur        | <  | 6.410677618 | TBILL.resultn      | =  | Missing |               |    | 0            | 1979         |      |
| psc.yrs.dur        | <  | 6.410677618 | TBILL.resultn      | <  | 2.65    |               |    | -0.001962166 | 1979         |      |
| psc.yrs.dur        | <  | 6.410677618 | TBILL.resultn      | >= | 2.65    |               |    | -0.002560299 | 1979         |      |
| psc.yrs.dur        | >= | 6.410677618 | AST.resultn        | =  | Missing |               |    | -0.000366417 | 1979         |      |
| psc.yrs.dur        | >= | 6.410677618 | AST.resultn        | <  | 66.5    |               |    | -0.001345002 | 1979         |      |
| psc.yrs.dur        | >= | 6.410677618 | AST.resultn        | >= | 66.5    |               |    | 0.001786471  | 1979         |      |
| age.yrs            | =  | Missing     |                    |    |         | Missing       |    | -0.000374448 | 1980         |      |
| age.yrs            | <  | 68.09034908 | TBILL.resultn      | =  | Missing | Missing       |    | -0.000401582 | 1980         |      |
| age.yrs            | <  | 68.09034908 | TBILL.resultn      | <  | 4.85    | ALK.times.uln | =  | Missing      | 0            | 1980 |
| age.yrs            | <  | 68.09034908 | TBILL.resultn      | <  | 4.85    | ALK.times.uln | <  | 5.269478607  | -0.000743563 | 1980 |
| age.yrs            | <  | 68.09034908 | TBILL.resultn      | <  | 4.85    | ALK.times.uln | >= | 5.269478607  | 0.00094601   | 1980 |
| age.yrs            | <  | 68.09034908 | TBILL.resultn      | >= | 4.85    | Missing       |    | -0.000705932 | 1980         |      |
| age.yrs            | >= | 68.09034908 |                    |    |         | Missing       |    | 0.001875617  | 1980         |      |
| TBILL.resultn      | =  | Missing     |                    |    |         |               |    | -0.002037073 | 1981         |      |
| TBILL.resultn      | <  | 1.65        | PLT.resultn        | =  | Missing |               |    | 0            | 1981         |      |
| TBILL.resultn      | <  | 1.65        | PLT.resultn        | <  | 483.5   |               |    | -0.002017759 | 1981         |      |
| TBILL.resultn      | <  | 1.65        | PLT.resultn        | >= | 483.5   |               |    | -0.000878384 | 1981         |      |
| TBILL.resultn      | >= | 1.65        | PLT.resultn        | =  | Missing |               |    | -0.000430053 | 1981         |      |
| TBILL.resultn      | >= | 1.65        | PLT.resultn        | <  | 211     |               |    | 0.00087353   | 1981         |      |
| TBILL.resultn      | >= | 1.65        | PLT.resultn        | >= | 211     |               |    | -0.001081845 | 1981         |      |
| age.yrs            | =  | Missing     |                    |    |         | Missing       |    | -0.0009457   | 1982         |      |
| age.yrs            | <  | 70.76659822 | Sodium.resultn     | =  | Missing | TBILL.resultn | =  | Missing      | -0.001367253 | 1982 |
| age.yrs            | <  | 70.76659822 | Sodium.resultn     | =  | Missing | TBILL.resultn | <  | 1.25         | -0.001685655 | 1982 |
| age.yrs            | <  | 70.76659822 | Sodium.resultn     | =  | Missing | TBILL.resultn | >= | 1.25         | 0            | 1982 |
| age.yrs            | <  | 70.76659822 | Sodium.resultn     | <  | 136.5   | Missing       |    | 0.000446432  | 1982         |      |
| age.yrs            | <  | 70.76659822 | Sodium.resultn     | >= | 136.5   | Missing       |    | -0.001004894 | 1982         |      |
| age.yrs            | >= | 70.76659822 |                    |    |         | Missing       |    | 0.001945429  | 1982         |      |
| ALB.resultn        | =  | Missing     |                    |    |         | Missing       |    | 0.000165932  | 1983         |      |
| ALB.resultn        | <  | 3.615       | Hemoglobin.resultn | =  | Missing | Missing       |    | 0.001490155  | 1983         |      |
| ALB.resultn        | <  | 3.615       | Hemoglobin.resultn | <  | 13.05   | AST.resultn   | =  | Missing      | 0.001134817  | 1983 |
| ALB.resultn        | <  | 3.615       | Hemoglobin.resultn | <  | 13.05   | AST.resultn   | <  | 67           | 0.002610078  | 1983 |
| ALB.resultn        | <  | 3.615       | Hemoglobin.resultn | <  | 13.05   | AST.resultn   | >= | 67           | 0            | 1983 |
| ALB.resultn        | <  | 3.615       | Hemoglobin.resultn | >= | 13.05   | Missing       |    | 0.001939004  | 1983         |      |
| ALB.resultn        | >= | 3.615       |                    |    |         | Missing       |    | -0.000332086 | 1983         |      |
| age.yrs            | =  | Missing     |                    |    |         | Missing       |    | 0.000146432  | 1984         |      |
| age.yrs            | <  | 69.76043806 | AST.resultn        | =  | Missing | Missing       |    | -0.000869158 | 1984         |      |
| age.yrs            | <  | 69.76043806 | AST.resultn        | <  | 216.5   | ALK.times.uln | =  | Missing      | 0            | 1984 |
| age.yrs            | <  | 69.76043806 | AST.resultn        | <  | 216.5   | ALK.times.uln | <  | 7.405360736  | 4.45E-05     | 1984 |
| age.yrs            | <  | 69.76043806 | AST.resultn        | <  | 216.5   | ALK.times.uln | >= | 7.405360736  | -0.000353361 | 1984 |
| age.yrs            | <  | 69.76043806 | AST.resultn        | >= | 216.5   | Missing       |    | 0.001717877  | 1984         |      |

|               |    |             |               |    |             |                    |              |             |              |      |
|---------------|----|-------------|---------------|----|-------------|--------------------|--------------|-------------|--------------|------|
| age.yrs       | >= | 69.76043806 |               |    |             | Missing            | 0.002108361  | 1984        |              |      |
| ALB.resultn   | =  | Missing     |               |    |             | Missing            | -0.001921657 | 1985        |              |      |
| ALB.resultn   | <  | 2.915       |               |    |             | Missing            | -0.001052431 | 1985        |              |      |
| ALB.resultn   | >= | 2.915       | TBILL.resultn | =  | Missing     | Missing            | -0.002554114 | 1985        |              |      |
| ALB.resultn   | >= | 2.915       | TBILL.resultn | <  | 3.1         | TBILL.resultn      | =            | Missing     | -0.002541425 | 1985 |
| ALB.resultn   | >= | 2.915       | TBILL.resultn | <  | 3.1         | TBILL.resultn      | <            | 2.05        | -0.002702785 | 1985 |
| ALB.resultn   | >= | 2.915       | TBILL.resultn | <  | 3.1         | TBILL.resultn      | >=           | 2.05        | 0            | 1985 |
| ALB.resultn   | >= | 2.915       | TBILL.resultn | >= | 3.1         | Missing            | -0.002785987 | 1985        |              |      |
| age.yrs       | =  | Missing     |               |    |             | Missing            | -0.001670355 | 1986        |              |      |
| age.yrs       | <  | 70.88295688 | TBILL.resultn | =  | Missing     | Missing            | -0.000800396 | 1986        |              |      |
| age.yrs       | <  | 70.88295688 | TBILL.resultn | <  | 2.35        | Missing            | -0.001896315 | 1986        |              |      |
| age.yrs       | <  | 70.88295688 | TBILL.resultn | >= | 2.35        | psc.yrs.dur        | =            | Missing     | -0.001137851 | 1986 |
| age.yrs       | <  | 70.88295688 | TBILL.resultn | >= | 2.35        | psc.yrs.dur        | <            | 0.454483231 | -0.002389487 | 1986 |
| age.yrs       | <  | 70.88295688 | TBILL.resultn | >= | 2.35        | psc.yrs.dur        | >=           | 0.454483231 | 0            | 1986 |
| age.yrs       | >= | 70.88295688 |               |    |             | Missing            | 0.001154376  | 1986        |              |      |
| psc.yrs.dur   | =  | Missing     |               |    |             |                    | 0.001120851  | 1987        |              |      |
| psc.yrs.dur   | <  | 7.404517454 | AST.resultn   | =  | Missing     |                    | 0            | 1987        |              |      |
| psc.yrs.dur   | <  | 7.404517454 | AST.resultn   | <  | 72.5        |                    | 0.001399679  | 1987        |              |      |
| psc.yrs.dur   | <  | 7.404517454 | AST.resultn   | >= | 72.5        |                    | 0.000454062  | 1987        |              |      |
| psc.yrs.dur   | >= | 7.404517454 | psc.yrs.dur   | =  | Missing     |                    | 0.002011678  | 1987        |              |      |
| psc.yrs.dur   | >= | 7.404517454 | psc.yrs.dur   | <  | 10.04654346 |                    | 0.003524986  | 1987        |              |      |
| psc.yrs.dur   | >= | 7.404517454 | psc.yrs.dur   | >= | 10.04654346 |                    | 0.000901918  | 1987        |              |      |
| ALK.times.uln | =  | Missing     | AST.resultn   | =  | Missing     |                    | 0.000742773  | 1988        |              |      |
| ALK.times.uln | =  | Missing     | AST.resultn   | <  | 125         |                    | 0.000866568  | 1988        |              |      |
| ALK.times.uln | =  | Missing     | AST.resultn   | >= | 125         |                    | 0            | 1988        |              |      |
| ALK.times.uln | <  | 4.964143426 |               |    |             |                    | 0.000402209  | 1988        |              |      |
| ALK.times.uln | >= | 4.964143426 | AST.resultn   | =  | Missing     |                    | 0.001474848  | 1988        |              |      |
| ALK.times.uln | >= | 4.964143426 | AST.resultn   | <  | 134         |                    | 0.002514657  | 1988        |              |      |
| ALK.times.uln | >= | 4.964143426 | AST.resultn   | >= | 134         |                    | 0.000435038  | 1988        |              |      |
| ALB.resultn   | =  | Missing     |               |    |             | Missing            | -0.001097672 | 1989        |              |      |
| ALB.resultn   | <  | 2.915       |               |    |             | Missing            | 0.000173212  | 1989        |              |      |
| ALB.resultn   | >= | 2.915       | TBILL.resultn | =  | Missing     | Missing            | -0.001297129 | 1989        |              |      |
| ALB.resultn   | >= | 2.915       | TBILL.resultn | <  | 2.65        | age.yrs            | =            | Missing     | -0.001292997 | 1989 |
| ALB.resultn   | >= | 2.915       | TBILL.resultn | <  | 2.65        | age.yrs            | <            | 53.64681725 | -0.001726776 | 1989 |
| ALB.resultn   | >= | 2.915       | TBILL.resultn | <  | 2.65        | age.yrs            | >=           | 53.64681725 | 0            | 1989 |
| ALB.resultn   | >= | 2.915       | TBILL.resultn | >= | 2.65        | Missing            | -0.001362927 | 1989        |              |      |
| ALK.times.uln | =  | Missing     | TBILL.resultn | =  | Missing     |                    | 0            | 1990        |              |      |
| ALK.times.uln | =  | Missing     | TBILL.resultn | <  | 1.15        |                    | 0.000739339  | 1990        |              |      |
| ALK.times.uln | =  | Missing     | TBILL.resultn | >= | 1.15        |                    | 0.002752267  | 1990        |              |      |
| ALK.times.uln | <  | 8.257538256 | ALK.times.uln | =  | Missing     |                    | 0.000718828  | 1990        |              |      |
| ALK.times.uln | <  | 8.257538256 | ALK.times.uln | <  | 5.462893197 |                    | 0.000609458  | 1990        |              |      |
| ALK.times.uln | <  | 8.257538256 | ALK.times.uln | >= | 5.462893197 |                    | 0.002132225  | 1990        |              |      |
| ALK.times.uln | >= | 8.257538256 |               |    |             |                    | -8.97E-05    | 1990        |              |      |
| ALB.resultn   | =  | Missing     |               |    |             | Missing            | -0.000523797 | 1991        |              |      |
| ALB.resultn   | <  | 2.95        |               |    |             | Missing            | 0.001454782  | 1991        |              |      |
| ALB.resultn   | >= | 2.95        | PLT.resultn   | =  | Missing     | Missing            | 0.000380051  | 1991        |              |      |
| ALB.resultn   | >= | 2.95        | PLT.resultn   | <  | 194.5       | Missing            | 0.002199923  | 1991        |              |      |
| ALB.resultn   | >= | 2.95        | PLT.resultn   | >= | 194.5       | TBILL.resultn      | =            | Missing     | 0.000175915  | 1991 |
| ALB.resultn   | >= | 2.95        | PLT.resultn   | >= | 194.5       | TBILL.resultn      | <            | 3.55        | 0.000186774  | 1991 |
| ALB.resultn   | >= | 2.95        | PLT.resultn   | >= | 194.5       | TBILL.resultn      | >=           | 3.55        | 0            | 1991 |
| age.yrs       | =  | Missing     |               |    |             | Missing            | 0.000865071  | 1992        |              |      |
| age.yrs       | <  | 69.76043806 | PLT.resultn   | =  | Missing     | Missing            | -5.88E-06    | 1992        |              |      |
| age.yrs       | <  | 69.76043806 | PLT.resultn   | <  | 209.5       | Hemoglobin.resultn | =            | Missing     | 0.001791424  | 1992 |
| age.yrs       | <  | 69.76043806 | PLT.resultn   | <  | 209.5       | Hemoglobin.resultn | <            | 13.95       | 0.004299418  | 1992 |
| age.yrs       | <  | 69.76043806 | PLT.resultn   | <  | 209.5       | Hemoglobin.resultn | >=           | 13.95       | 0            | 1992 |
| age.yrs       | <  | 69.76043806 | PLT.resultn   | >= | 209.5       |                    | Missing      | 0.000713342 | 1992         |      |
| age.yrs       | >= | 69.76043806 |               |    |             | Missing            | 0.002715256  | 1992        |              |      |
| psc.yrs.dur   | =  | Missing     |               |    |             |                    | -4.51E-05    | 1993        |              |      |
| psc.yrs.dur   | <  | 6.592744695 | TBILL.resultn | =  | Missing     |                    | 0            | 1993        |              |      |
| psc.yrs.dur   | <  | 6.592744695 | TBILL.resultn | <  | 3.15        |                    | -0.000122956 | 1993        |              |      |
| psc.yrs.dur   | <  | 6.592744695 | TBILL.resultn | >= | 3.15        |                    | -0.000623923 | 1993        |              |      |
| psc.yrs.dur   | >= | 6.592744695 | AST.resultn   | =  | Missing     |                    | 0.000773838  | 1993        |              |      |

|                    |    |             |                    |    |             |               |         |              |              |      |
|--------------------|----|-------------|--------------------|----|-------------|---------------|---------|--------------|--------------|------|
| psc.yrs.dur        | >= | 6.592744695 | AST.resultn        | <  | 42          |               |         | -0.001000478 | 1993         |      |
| psc.yrs.dur        | >= | 6.592744695 | AST.resultn        | >= | 42          |               |         | 0.002411668  | 1993         |      |
| PLT.resultn        | =  | Missing     |                    |    |             |               | Missing | -0.002504155 | 1994         |      |
| PLT.resultn        | <  | 170         |                    |    |             |               | Missing | 0.000367765  | 1994         |      |
| PLT.resultn        | >= | 170         | psc.yrs.dur        | =  | Missing     |               | Missing | -0.001772509 | 1994         |      |
| PLT.resultn        | >= | 170         | psc.yrs.dur        | <  | 0.839151266 |               | Missing | -0.00226692  | 1994         |      |
| PLT.resultn        | >= | 170         | psc.yrs.dur        | >= | 0.839151266 | age.yrs       | =       | Missing      | -0.001175095 | 1994 |
| PLT.resultn        | >= | 170         | psc.yrs.dur        | >= | 0.839151266 | age.yrs       | <       | 56.60643395  | -0.001484331 | 1994 |
| PLT.resultn        | >= | 170         | psc.yrs.dur        | >= | 0.839151266 | age.yrs       | >=      | 56.60643395  | 0            | 1994 |
| TBILI.resultn      | =  | Missing     |                    |    |             |               | Missing | 0.000629916  | 1995         |      |
| TBILI.resultn      | <  | 3.5         | ALK.times.uln      | =  | Missing     | AST.resultn   | =       | Missing      | 0.000822317  | 1995 |
| TBILI.resultn      | <  | 3.5         | ALK.times.uln      | =  | Missing     | AST.resultn   | <       | 68.5         | 0.00145276   | 1995 |
| TBILI.resultn      | <  | 3.5         | ALK.times.uln      | =  | Missing     | AST.resultn   | >=      | 68.5         | 0            | 1995 |
| TBILI.resultn      | <  | 3.5         | ALK.times.uln      | <  | 5.412513212 |               | Missing | 8.77E-05     | 1995         |      |
| TBILI.resultn      | <  | 3.5         | ALK.times.uln      | >= | 5.412513212 |               | Missing | 0.001212212  | 1995         |      |
| TBILI.resultn      | >= | 3.5         |                    |    |             |               | Missing | 0.001640281  | 1995         |      |
| psc.yrs.dur        | =  | Missing     |                    |    |             |               | Missing | -0.000411652 | 1996         |      |
| psc.yrs.dur        | <  | 6.324435318 |                    |    |             |               | Missing | -0.000481451 | 1996         |      |
| psc.yrs.dur        | >= | 6.324435318 | AST.resultn        | =  | Missing     |               | Missing | -4.90E-05    | 1996         |      |
| psc.yrs.dur        | >= | 6.324435318 | AST.resultn        | <  | 43          |               | Missing | -0.001247308 | 1996         |      |
| psc.yrs.dur        | >= | 6.324435318 | AST.resultn        | >= | 43          | psc.yrs.dur   | =       | Missing      | 0.000799741  | 1996 |
| psc.yrs.dur        | >= | 6.324435318 | AST.resultn        | >= | 43          | psc.yrs.dur   | <       | 10.12457221  | 0.001919379  | 1996 |
| psc.yrs.dur        | >= | 6.324435318 | AST.resultn        | >= | 43          | psc.yrs.dur   | >=      | 10.12457221  | 0            | 1996 |
| age.yrs            | =  | Missing     |                    |    |             |               | Missing | 0.00083098   | 1997         |      |
| age.yrs            | <  | 69.71800137 | Hemoglobin.resultn | =  | Missing     | TBILI.resultn | =       | Missing      | 0            | 1997 |
| age.yrs            | <  | 69.71800137 | Hemoglobin.resultn | =  | Missing     | TBILI.resultn | <       | 1.2          | 0.000738212  | 1997 |
| age.yrs            | <  | 69.71800137 | Hemoglobin.resultn | =  | Missing     | TBILI.resultn | >=      | 1.2          | 0.00253704   | 1997 |
| age.yrs            | <  | 69.71800137 | Hemoglobin.resultn | <  | 13.75       |               | Missing | 0.001138856  | 1997         |      |
| age.yrs            | <  | 69.71800137 | Hemoglobin.resultn | >= | 13.75       |               | Missing | -3.79E-06    | 1997         |      |
| age.yrs            | >= | 69.71800137 |                    |    |             |               | Missing | 0.006151329  | 1997         |      |
| psc.yrs.dur        | =  | Missing     |                    |    |             |               | Missing | -0.002227568 | 1998         |      |
| psc.yrs.dur        | <  | 1.916495551 |                    |    |             |               | Missing | -0.002523648 | 1998         |      |
| psc.yrs.dur        | >= | 1.916495551 | age.yrs            | =  | Missing     |               | Missing | -0.001571694 | 1998         |      |
| psc.yrs.dur        | >= | 1.916495551 | age.yrs            | <  | 53.35934292 |               | Missing | -0.002076594 | 1998         |      |
| psc.yrs.dur        | >= | 1.916495551 | age.yrs            | >= | 53.35934292 | AST.resultn   | =       | Missing      | -0.000177208 | 1998 |
| psc.yrs.dur        | >= | 1.916495551 | age.yrs            | >= | 53.35934292 | AST.resultn   | <       | 63.5         | -0.000338306 | 1998 |
| psc.yrs.dur        | >= | 1.916495551 | age.yrs            | >= | 53.35934292 | AST.resultn   | >=      | 63.5         | 0            | 1998 |
| psc.yrs.dur        | =  | Missing     |                    |    |             |               |         | -0.000460812 | 1999         |      |
| psc.yrs.dur        | <  | 6.379192334 | ALB.resultn        | =  | Missing     |               |         | 0            | 1999         |      |
| psc.yrs.dur        | <  | 6.379192334 | ALB.resultn        | <  | 3.03        |               |         | 0.000217228  | 1999         |      |
| psc.yrs.dur        | <  | 6.379192334 | ALB.resultn        | >= | 3.03        |               |         | -0.00071575  | 1999         |      |
| psc.yrs.dur        | >= | 6.379192334 | TBILI.resultn      | =  | Missing     |               |         | 0.000448738  | 1999         |      |
| psc.yrs.dur        | >= | 6.379192334 | TBILI.resultn      | <  | 0.75        |               |         | -0.001313389 | 1999         |      |
| psc.yrs.dur        | >= | 6.379192334 | TBILI.resultn      | >= | 0.75        |               |         | 0.001880466  | 1999         |      |
| ALK.times.uln      | =  | Missing     |                    |    |             |               | Missing | -0.001199756 | 2000         |      |
| ALK.times.uln      | <  | 7.728571429 | ALK.times.uln      | =  | Missing     |               | Missing | -0.000963377 | 2000         |      |
| ALK.times.uln      | <  | 7.728571429 | ALK.times.uln      | <  | 5.446215139 | TBILI.resultn | =       | Missing      | -0.001084672 | 2000 |
| ALK.times.uln      | <  | 7.728571429 | ALK.times.uln      | <  | 5.446215139 | TBILI.resultn | <       | 2.8          | -0.001155566 | 2000 |
| ALK.times.uln      | <  | 7.728571429 | ALK.times.uln      | <  | 5.446215139 | TBILI.resultn | >=      | 2.8          | 0            | 2000 |
| ALK.times.uln      | <  | 7.728571429 | ALK.times.uln      | >= | 5.446215139 |               | Missing | 0.000856048  | 2000         |      |
| ALK.times.uln      | >= | 7.728571429 |                    |    |             |               | Missing | -0.001683245 | 2000         |      |
| ALB.resultn        | =  | Missing     |                    |    |             |               | Missing | -0.000811733 | 2001         |      |
| ALB.resultn        | <  | 2.95        |                    |    |             |               | Missing | 0.000543519  | 2001         |      |
| ALB.resultn        | >= | 2.95        | TBILI.resultn      | =  | Missing     |               | Missing | -0.0008534   | 2001         |      |
| ALB.resultn        | >= | 2.95        | TBILI.resultn      | <  | 2.75        | ALK.times.uln | =       | Missing      | 0            | 2001 |
| ALB.resultn        | >= | 2.95        | TBILI.resultn      | <  | 2.75        | ALK.times.uln | <       | 3.635579421  | -0.001522254 | 2001 |
| ALB.resultn        | >= | 2.95        | TBILI.resultn      | <  | 2.75        | ALK.times.uln | >=      | 3.635579421  | 0.000274482  | 2001 |
| ALB.resultn        | >= | 2.95        | TBILI.resultn      | >= | 2.75        |               | Missing | -0.001148384 | 2001         |      |
| Hemoglobin.resultn | =  | Missing     | ALB.resultn        | =  | Missing     |               |         | -0.001634222 | 2002         |      |
| Hemoglobin.resultn | =  | Missing     | ALB.resultn        | <  | 3.95        |               |         | 0.000167984  | 2002         |      |
| Hemoglobin.resultn | =  | Missing     | ALB.resultn        | >= | 3.95        |               |         | -0.001147408 | 2002         |      |
| Hemoglobin.resultn | <  | 14.15       | TBILI.resultn      | =  | Missing     |               |         | -0.000454651 | 2002         |      |

|                    |    |             |                    |    |             |               |         |              |              |      |
|--------------------|----|-------------|--------------------|----|-------------|---------------|---------|--------------|--------------|------|
| Hemoglobin.resultn | <  | 14.15       | TBILL.resultn      | <  | 0.55        |               |         | -0.001618557 | 2002         |      |
| Hemoglobin.resultn | <  | 14.15       | TBILL.resultn      | >= | 0.55        |               |         | 0            | 2002         |      |
| Hemoglobin.resultn | >= | 14.15       |                    |    |             |               |         | -0.001356993 | 2002         |      |
| ALB.resultn        | =  | Missing     |                    |    |             |               |         | -0.000750763 | 2003         |      |
| ALB.resultn        | <  | 3.33        | psc.yrs.dur        | =  | Missing     |               |         | 0.001421706  | 2003         |      |
| ALB.resultn        | <  | 3.33        | psc.yrs.dur        | <  | 1.712525667 |               |         | 0.000226811  | 2003         |      |
| ALB.resultn        | <  | 3.33        | psc.yrs.dur        | >= | 1.712525667 |               |         | 0.002517026  | 2003         |      |
| ALB.resultn        | >= | 3.33        | ALK.times.uln      | =  | Missing     |               |         | 0            | 2003         |      |
| ALB.resultn        | >= | 3.33        | ALK.times.uln      | <  | 5.848260021 |               |         | -0.000467152 | 2003         |      |
| ALB.resultn        | >= | 3.33        | ALK.times.uln      | >= | 5.848260021 |               |         | 0.001353029  | 2003         |      |
| Hemoglobin.resultn | =  | Missing     | TBILL.resultn      | =  | Missing     |               |         | 0.001005491  | 2004         |      |
| Hemoglobin.resultn | =  | Missing     | TBILL.resultn      | <  | 1.15        |               |         | 0.000464995  | 2004         |      |
| Hemoglobin.resultn | =  | Missing     | TBILL.resultn      | >= | 1.15        |               |         | 0.002672018  | 2004         |      |
| Hemoglobin.resultn | <  | 11.75       |                    |    |             |               |         | 0.000233006  | 2004         |      |
| Hemoglobin.resultn | >= | 11.75       | ALK.times.uln      | =  | Missing     |               |         | 0            | 2004         |      |
| Hemoglobin.resultn | >= | 11.75       | ALK.times.uln      | <  | 2.809831802 |               |         | 6.11E-05     | 2004         |      |
| Hemoglobin.resultn | >= | 11.75       | ALK.times.uln      | >= | 2.809831802 |               |         | 0.001077228  | 2004         |      |
| age.yrs            | =  | Missing     |                    |    |             | Missing       |         | 0.000873119  | 2005         |      |
| age.yrs            | <  | 69.84257358 | Hemoglobin.resultn | =  | Missing     | ALB.resultn   | =       | Missing      | 0            | 2005 |
| age.yrs            | <  | 69.84257358 | Hemoglobin.resultn | =  | Missing     | ALB.resultn   | <       | 3.95         | 0.002362706  | 2005 |
| age.yrs            | <  | 69.84257358 | Hemoglobin.resultn | =  | Missing     | ALB.resultn   | >=      | 3.95         | 0.000858181  | 2005 |
| age.yrs            | <  | 69.84257358 | Hemoglobin.resultn | <  | 11.35       |               | Missing | 0.000552492  | 2005         |      |
| age.yrs            | <  | 69.84257358 | Hemoglobin.resultn | >= | 11.35       |               | Missing | 0.000596114  | 2005         |      |
| age.yrs            | >= | 69.84257358 |                    |    |             |               | Missing | 0.005131538  | 2005         |      |
| PLT.resultn        | =  | Missing     |                    |    |             |               | Missing | 0.000284218  | 2006         |      |
| PLT.resultn        | <  | 170         |                    |    |             |               | Missing | 0.002040228  | 2006         |      |
| PLT.resultn        | >= | 170         | ALB.resultn        | =  | Missing     |               | Missing | 0.00357194   | 2006         |      |
| PLT.resultn        | >= | 170         | ALB.resultn        | <  | 3.595       | age.yrs       | =       | Missing      | 0.000505595  | 2006 |
| PLT.resultn        | >= | 170         | ALB.resultn        | <  | 3.595       | age.yrs       | <       | 40.13278576  | 0.001232389  | 2006 |
| PLT.resultn        | >= | 170         | ALB.resultn        | <  | 3.595       | age.yrs       | >=      | 40.13278576  | 0            | 2006 |
| PLT.resultn        | >= | 170         | ALB.resultn        | >= | 3.595       |               | Missing | 0.000432723  | 2006         |      |
| AST.resultn        | =  | Missing     |                    |    |             |               | Missing | -0.00206079  | 2007         |      |
| AST.resultn        | <  | 141.5       | ALK.times.uln      | =  | Missing     |               | Missing | -0.001039543 | 2007         |      |
| AST.resultn        | <  | 141.5       | ALK.times.uln      | <  | 5.965616681 | PLT.resultn   | =       | Missing      | 0            | 2007 |
| AST.resultn        | <  | 141.5       | ALK.times.uln      | <  | 5.965616681 | PLT.resultn   | <       | 194.5        | 0.001118555  | 2007 |
| AST.resultn        | <  | 141.5       | ALK.times.uln      | <  | 5.965616681 | PLT.resultn   | >=      | 194.5        | -0.001625511 | 2007 |
| AST.resultn        | <  | 141.5       | ALK.times.uln      | >= | 5.965616681 |               | Missing | 2.39E-05     | 2007         |      |
| AST.resultn        | >= | 141.5       |                    |    |             |               | Missing | -0.00157896  | 2007         |      |
| ALB.resultn        | =  | Missing     |                    |    |             |               | Missing | -0.00126083  | 2008         |      |
| ALB.resultn        | <  | 3.105       |                    |    |             |               | Missing | -1.54E-06    | 2008         |      |
| ALB.resultn        | >= | 3.105       | Hemoglobin.resultn | =  | Missing     | TBILL.resultn | =       | Missing      | -0.001442368 | 2008 |
| ALB.resultn        | >= | 3.105       | Hemoglobin.resultn | =  | Missing     | TBILL.resultn | <       | 0.95         | -0.002136842 | 2008 |
| ALB.resultn        | >= | 3.105       | Hemoglobin.resultn | =  | Missing     | TBILL.resultn | >=      | 0.95         | 0            | 2008 |
| ALB.resultn        | >= | 3.105       | Hemoglobin.resultn | <  | 13.15       |               | Missing | -0.002122629 | 2008         |      |
| ALB.resultn        | >= | 3.105       | Hemoglobin.resultn | >= | 13.15       |               | Missing | -0.001547274 | 2008         |      |
| ALB.resultn        | =  | Missing     |                    |    |             |               | Missing | -1.68E-05    | 2009         |      |
| ALB.resultn        | <  | 2.915       |                    |    |             |               | Missing | 0.000102787  | 2009         |      |
| ALB.resultn        | >= | 2.915       | ALK.times.uln      | =  | Missing     |               | Missing | -0.000889502 | 2009         |      |
| ALB.resultn        | >= | 2.915       | ALK.times.uln      | <  | 7.582826997 | TBILL.resultn | =       | Missing      | -0.000958539 | 2009 |
| ALB.resultn        | >= | 2.915       | ALK.times.uln      | <  | 7.582826997 | TBILL.resultn | <       | 0.85         | -0.001680401 | 2009 |
| ALB.resultn        | >= | 2.915       | ALK.times.uln      | <  | 7.582826997 | TBILL.resultn | >=      | 0.85         | 0            | 2009 |
| ALB.resultn        | >= | 2.915       | ALK.times.uln      | >= | 7.582826997 |               | Missing | -0.001336152 | 2009         |      |
| age.yrs            | =  | Missing     |                    |    |             |               | Missing | -0.000441136 | 2010         |      |
| age.yrs            | <  | 53.64681725 |                    |    |             |               | Missing | -0.000578802 | 2010         |      |
| age.yrs            | >= | 53.64681725 | AST.resultn        | =  | Missing     |               | Missing | -0.000136181 | 2010         |      |
| age.yrs            | >= | 53.64681725 | AST.resultn        | <  | 51.5        |               | Missing | -0.001159148 | 2010         |      |
| age.yrs            | >= | 53.64681725 | AST.resultn        | >= | 51.5        | PLT.resultn   | =       | Missing      | 0.000940626  | 2010 |
| age.yrs            | >= | 53.64681725 | AST.resultn        | >= | 51.5        | PLT.resultn   | <       | 251.5        | 0.001496451  | 2010 |
| age.yrs            | >= | 53.64681725 | AST.resultn        | >= | 51.5        | PLT.resultn   | >=      | 251.5        | 0            | 2010 |
| Sodium.resultn     | =  | Missing     | TBILL.resultn      | =  | Missing     |               |         | 0.001025338  | 2011         |      |
| Sodium.resultn     | =  | Missing     | TBILL.resultn      | <  | 1.55        |               |         | -0.001288868 | 2011         |      |
| Sodium.resultn     | =  | Missing     | TBILL.resultn      | >= | 1.55        |               |         | 0.000646324  | 2011         |      |

|                    |    |             |                    |    |             |               |         |              |              |      |
|--------------------|----|-------------|--------------------|----|-------------|---------------|---------|--------------|--------------|------|
| Sodium.resultn     | <  | 136.5       |                    |    |             |               |         | 0.001500477  | 2011         |      |
| Sodium.resultn     | >= | 136.5       | Hemoglobin.resultn | =  | Missing     |               |         | 0            | 2011         |      |
| Sodium.resultn     | >= | 136.5       | Hemoglobin.resultn | <  | 12.85       |               |         | -0.000761641 | 2011         |      |
| Sodium.resultn     | >= | 136.5       | Hemoglobin.resultn | >= | 12.85       |               |         | -7.42E-05    | 2011         |      |
| AST.resultn        | =  | Missing     |                    |    |             | Missing       |         | -0.002145559 | 2012         |      |
| AST.resultn        | <  | 213.5       | age.yrs            | =  | Missing     | Missing       |         | -0.001484473 | 2012         |      |
| AST.resultn        | <  | 213.5       | age.yrs            | <  | 53.56194387 | Missing       |         | -0.001653553 | 2012         |      |
| AST.resultn        | <  | 213.5       | age.yrs            | >= | 53.56194387 | AST.resultn   | =       | Missing      | -0.00110874  | 2012 |
| AST.resultn        | <  | 213.5       | age.yrs            | >= | 53.56194387 | AST.resultn   | <       | 51.5         | -0.002100771 | 2012 |
| AST.resultn        | <  | 213.5       | age.yrs            | >= | 53.56194387 | AST.resultn   | >=      | 51.5         | 0            | 2012 |
| AST.resultn        | >= | 213.5       |                    |    |             | Missing       |         | 0.000738911  | 2012         |      |
| TBILI.resultn      | =  | Missing     |                    |    |             | Missing       |         | -0.00213219  | 2013         |      |
| TBILI.resultn      | <  | 0.85        |                    |    |             | Missing       |         | -0.003165288 | 2013         |      |
| TBILI.resultn      | >= | 0.85        | Hemoglobin.resultn | =  | Missing     | Missing       |         | -0.000930508 | 2013         |      |
| TBILI.resultn      | >= | 0.85        | Hemoglobin.resultn | <  | 12.55       | Missing       |         | -0.002406412 | 2013         |      |
| TBILI.resultn      | >= | 0.85        | Hemoglobin.resultn | >= | 12.55       | ALK.times.uln | =       | Missing      | -0.001911711 | 2013 |
| TBILI.resultn      | >= | 0.85        | Hemoglobin.resultn | >= | 12.55       | ALK.times.uln | <       | 2.776684566  | -0.003167979 | 2013 |
| TBILI.resultn      | >= | 0.85        | Hemoglobin.resultn | >= | 12.55       | ALK.times.uln | >=      | 2.776684566  | 0            | 2013 |
| ALK.times.uln      | =  | Missing     | AST.resultn        | =  | Missing     | Missing       |         | -0.001819499 | 2014         |      |
| ALK.times.uln      | =  | Missing     | AST.resultn        | <  | 89.5        | TBILI.resultn | =       | Missing      | -0.001696802 | 2014 |
| ALK.times.uln      | =  | Missing     | AST.resultn        | <  | 89.5        | TBILI.resultn | <       | 0.95         | -0.00241468  | 2014 |
| ALK.times.uln      | =  | Missing     | AST.resultn        | <  | 89.5        | TBILI.resultn | >=      | 0.95         | 0            | 2014 |
| ALK.times.uln      | =  | Missing     | AST.resultn        | >= | 89.5        |               | Missing | -0.002084265 | 2014         |      |
| ALK.times.uln      | <  | 5.85173913  |                    |    |             | Missing       |         | -0.001662427 | 2014         |      |
| ALK.times.uln      | >= | 5.85173913  |                    |    |             | Missing       |         | -0.000717574 | 2014         |      |
| ALB.resultn        | =  | Missing     |                    |    |             | Missing       |         | -0.000818604 | 2015         |      |
| ALB.resultn        | <  | 2.915       |                    |    |             | Missing       |         | 0.00040822   | 2015         |      |
| ALB.resultn        | >= | 2.915       | TBILI.resultn      | =  | Missing     | Missing       |         | -0.001505477 | 2015         |      |
| ALB.resultn        | >= | 2.915       | TBILI.resultn      | <  | 3.75        | psc.yrs.dur   | =       | Missing      | -0.001507162 | 2015 |
| ALB.resultn        | >= | 2.915       | TBILI.resultn      | <  | 3.75        | psc.yrs.dur   | <       | 7.070499658  | -0.001736321 | 2015 |
| ALB.resultn        | >= | 2.915       | TBILI.resultn      | <  | 3.75        | psc.yrs.dur   | >=      | 7.070499658  | 0            | 2015 |
| ALB.resultn        | >= | 2.915       | TBILI.resultn      | >= | 3.75        |               | Missing | -0.001472282 | 2015         |      |
| PLT.resultn        | =  | Missing     |                    |    |             | Missing       |         | -0.002207604 | 2016         |      |
| PLT.resultn        | <  | 249.5       | ALK.times.uln      | =  | Missing     | PLT.resultn   | =       | Missing      | -0.001134833 | 2016 |
| PLT.resultn        | <  | 249.5       | ALK.times.uln      | =  | Missing     | PLT.resultn   | <       | 214.5        | -0.002356961 | 2016 |
| PLT.resultn        | <  | 249.5       | ALK.times.uln      | =  | Missing     | PLT.resultn   | >=      | 214.5        | 0            | 2016 |
| PLT.resultn        | <  | 249.5       | ALK.times.uln      | <  | 3.17826087  |               | Missing | -0.002220842 | 2016         |      |
| PLT.resultn        | <  | 249.5       | ALK.times.uln      | >= | 3.17826087  |               | Missing | -3.14E-05    | 2016         |      |
| PLT.resultn        | >= | 249.5       |                    |    |             | Missing       |         | -0.002715796 | 2016         |      |
| ALK.times.uln      | =  | Missing     |                    |    |             | Missing       |         | -0.001123469 | 2017         |      |
| ALK.times.uln      | <  | 7.850310559 | ALK.times.uln      | =  | Missing     | Missing       |         | -0.00081845  | 2017         |      |
| ALK.times.uln      | <  | 7.850310559 | ALK.times.uln      | <  | 5.297286927 | ALB.resultn   | =       | Missing      | 0            | 2017 |
| ALK.times.uln      | <  | 7.850310559 | ALK.times.uln      | <  | 5.297286927 | ALB.resultn   | <       | 3.34         | 0.000576497  | 2017 |
| ALK.times.uln      | <  | 7.850310559 | ALK.times.uln      | <  | 5.297286927 | ALB.resultn   | >=      | 3.34         | -0.001167592 | 2017 |
| ALK.times.uln      | <  | 7.850310559 | ALK.times.uln      | >= | 5.297286927 |               | Missing | 0.000587041  | 2017         |      |
| ALK.times.uln      | >= | 7.850310559 |                    |    |             | Missing       |         | -0.001286847 | 2017         |      |
| Hemoglobin.resultn | =  | Missing     | AST.resultn        | =  | Missing     | Missing       |         | -0.000736015 | 2018         |      |
| Hemoglobin.resultn | =  | Missing     | AST.resultn        | <  | 62          | Missing       |         | -0.001949649 | 2018         |      |
| Hemoglobin.resultn | =  | Missing     | AST.resultn        | >= | 62          | ALB.resultn   | =       | Missing      | 0.000863775  | 2018 |
| Hemoglobin.resultn | =  | Missing     | AST.resultn        | >= | 62          | ALB.resultn   | <       | 4.05         | 0.00172755   | 2018 |
| Hemoglobin.resultn | =  | Missing     | AST.resultn        | >= | 62          | ALB.resultn   | >=      | 4.05         | 0            | 2018 |
| Hemoglobin.resultn | <  | 13.55       |                    |    |             | Missing       |         | -0.000912721 | 2018         |      |
| Hemoglobin.resultn | >= | 13.55       |                    |    |             | Missing       |         | -0.001647551 | 2018         |      |
| ALK.times.uln      | =  | Missing     | TBILI.resultn      | =  | Missing     |               |         | 0.000887692  | 2019         |      |
| ALK.times.uln      | =  | Missing     | TBILI.resultn      | <  | 1.65        |               |         | 0.00038419   | 2019         |      |
| ALK.times.uln      | =  | Missing     | TBILI.resultn      | >= | 1.65        |               |         | 0.003254151  | 2019         |      |
| ALK.times.uln      | <  | 5.963877551 | TBILI.resultn      | =  | Missing     |               |         | 0.000575991  | 2019         |      |
| ALK.times.uln      | <  | 5.963877551 | TBILI.resultn      | <  | 2           |               |         | 0.000623383  | 2019         |      |
| ALK.times.uln      | <  | 5.963877551 | TBILI.resultn      | >= | 2           |               |         | 0            | 2019         |      |
| ALK.times.uln      | >= | 5.963877551 |                    |    |             |               |         | 0.001752821  | 2019         |      |
| psc.yrs.dur        | =  | Missing     |                    |    |             |               |         | -0.000681808 | 2020         |      |
| psc.yrs.dur        | <  | 0.006844627 | Hemoglobin.resultn | =  | Missing     |               |         | 0.001054109  | 2020         |      |

|                    |    |             |                    |    |             |               |    |              |              |      |
|--------------------|----|-------------|--------------------|----|-------------|---------------|----|--------------|--------------|------|
| psc.yrs.dur        | <  | 0.006844627 | Hemoglobin.resultn | <  | 13.85       |               |    | 0.003979419  | 2020         |      |
| psc.yrs.dur        | <  | 0.006844627 | Hemoglobin.resultn | >= | 13.85       |               |    | -0.001605264 | 2020         |      |
| psc.yrs.dur        | >= | 0.006844627 | age.yrs            | =  | Missing     |               |    | -0.000879764 | 2020         |      |
| psc.yrs.dur        | >= | 0.006844627 | age.yrs            | <  | 54.36824093 |               |    | -0.001146206 | 2020         |      |
| psc.yrs.dur        | >= | 0.006844627 | age.yrs            | >= | 54.36824093 |               |    | 0            | 2020         |      |
| ALK.times.uln      | =  | Missing     | TBILL.resultn      | =  | Missing     |               |    | -0.000476745 | 2021         |      |
| ALK.times.uln      | =  | Missing     | TBILL.resultn      | <  | 1.1         |               |    | -0.001180321 | 2021         |      |
| ALK.times.uln      | =  | Missing     | TBILL.resultn      | >= | 1.1         |               |    | 0.001382705  | 2021         |      |
| ALK.times.uln      | <  | 5.92438247  | Hemoglobin.resultn | =  | Missing     |               |    | 0            | 2021         |      |
| ALK.times.uln      | <  | 5.92438247  | Hemoglobin.resultn | <  | 11.55       |               |    | 0.002248507  | 2021         |      |
| ALK.times.uln      | <  | 5.92438247  | Hemoglobin.resultn | >= | 11.55       |               |    | -0.000913275 | 2021         |      |
| ALK.times.uln      | >= | 5.92438247  |                    |    |             |               |    | 0.000457249  | 2021         |      |
| age.yrs            | =  | Missing     |                    |    |             |               |    | 0.000599947  | 2022         |      |
| age.yrs            | <  | 49.15811088 | ALK.times.uln      | =  | Missing     |               |    | 0            | 2022         |      |
| age.yrs            | <  | 49.15811088 | ALK.times.uln      | <  | 5.446215139 |               |    | 0.000158556  | 2022         |      |
| age.yrs            | <  | 49.15811088 | ALK.times.uln      | >= | 5.446215139 |               |    | 0.001630333  | 2022         |      |
| age.yrs            | >= | 49.15811088 | TBILL.resultn      | =  | Missing     |               |    | 0.001267107  | 2022         |      |
| age.yrs            | >= | 49.15811088 | TBILL.resultn      | <  | 1.5         |               |    | 0.001088545  | 2022         |      |
| age.yrs            | >= | 49.15811088 | TBILL.resultn      | >= | 1.5         |               |    | 0.0022492    | 2022         |      |
| Hemoglobin.resultn | =  | Missing     | ALB.resultn        | =  | Missing     |               |    | -0.002658678 | 2023         |      |
| Hemoglobin.resultn | =  | Missing     | ALB.resultn        | <  | 3.95        |               |    | 0.000380238  | 2023         |      |
| Hemoglobin.resultn | =  | Missing     | ALB.resultn        | >= | 3.95        |               |    | -0.00193462  | 2023         |      |
| Hemoglobin.resultn | <  | 11.75       |                    |    |             |               |    | -0.002040814 | 2023         |      |
| Hemoglobin.resultn | >= | 11.75       | TBILL.resultn      | =  | Missing     |               |    | -0.001926367 | 2023         |      |
| Hemoglobin.resultn | >= | 11.75       | TBILL.resultn      | <  | 3           |               |    | -0.002053941 | 2023         |      |
| Hemoglobin.resultn | >= | 11.75       | TBILL.resultn      | >= | 3           |               |    | 0            | 2023         |      |
| psc.yrs.dur        | =  | Missing     |                    |    |             |               |    | -0.001918516 | 2024         |      |
| psc.yrs.dur        | <  | 7.817932923 | age.yrs            | =  | Missing     |               |    | -0.002026937 | 2024         |      |
| psc.yrs.dur        | <  | 7.817932923 | age.yrs            | <  | 69.42231348 |               |    | -0.002120344 | 2024         |      |
| psc.yrs.dur        | <  | 7.817932923 | age.yrs            | >= | 69.42231348 |               |    | 0            | 2024         |      |
| psc.yrs.dur        | >= | 7.817932923 | psc.yrs.dur        | =  | Missing     |               |    | -0.001006971 | 2024         |      |
| psc.yrs.dur        | >= | 7.817932923 | psc.yrs.dur        | <  | 10.28610541 |               |    | 0.000655626  | 2024         |      |
| psc.yrs.dur        | >= | 7.817932923 | psc.yrs.dur        | >= | 10.28610541 |               |    | -0.00198497  | 2024         |      |
| TBILL.resultn      | =  | Missing     |                    |    |             | Missing       |    | -0.006087349 | 2025         |      |
| TBILL.resultn      | <  | 0.75        |                    |    |             | Missing       |    | -0.006922283 | 2025         |      |
| TBILL.resultn      | >= | 0.75        | psc.yrs.dur        | =  | Missing     | Missing       |    | -0.005178624 | 2025         |      |
| TBILL.resultn      | >= | 0.75        | psc.yrs.dur        | <  | 0.824093087 | Missing       |    | -0.006101629 | 2025         |      |
| TBILL.resultn      | >= | 0.75        | psc.yrs.dur        | >= | 0.824093087 | ALB.resultn   | =  | Missing      | -0.003997178 | 2025 |
| TBILL.resultn      | >= | 0.75        | psc.yrs.dur        | >= | 0.824093087 | ALB.resultn   | <  | 4.25         | -0.00536764  | 2025 |
| TBILL.resultn      | >= | 0.75        | psc.yrs.dur        | >= | 0.824093087 | ALB.resultn   | >= | 4.25         | 0            | 2025 |
| AST.resultn        | =  | Missing     |                    |    |             | Missing       |    | -0.003298545 | 2026         |      |
| AST.resultn        | <  | 43          |                    |    |             | Missing       |    | -0.003293335 | 2026         |      |
| AST.resultn        | >= | 43          | AST.resultn        | =  | Missing     | Missing       |    | -0.001893894 | 2026         |      |
| AST.resultn        | >= | 43          | AST.resultn        | <  | 72.5        | TBILL.resultn | =  | Missing      | -0.001036547 | 2026 |
| AST.resultn        | >= | 43          | AST.resultn        | <  | 72.5        | TBILL.resultn | <  | 0.85         | -0.002149875 | 2026 |
| AST.resultn        | >= | 43          | AST.resultn        | <  | 72.5        | TBILL.resultn | >= | 0.85         | 0            | 2026 |
| AST.resultn        | >= | 43          | AST.resultn        | >= | 72.5        |               |    | Missing      | -0.002488994 | 2026 |
| Sodium.resultn     | =  | Missing     |                    |    |             | Missing       |    | -0.002339066 | 2027         |      |
| Sodium.resultn     | <  | 142.5       | PLT.resultn        | =  | Missing     | Missing       |    | -0.003009177 | 2027         |      |
| Sodium.resultn     | <  | 142.5       | PLT.resultn        | <  | 210.5       | TBILL.resultn | =  | Missing      | -0.001397914 | 2027 |
| Sodium.resultn     | <  | 142.5       | PLT.resultn        | <  | 210.5       | TBILL.resultn | <  | 1.05         | -0.003010893 | 2027 |
| Sodium.resultn     | <  | 142.5       | PLT.resultn        | <  | 210.5       | TBILL.resultn | >= | 1.05         | 0            | 2027 |
| Sodium.resultn     | <  | 142.5       | PLT.resultn        | >= | 210.5       |               |    | Missing      | -0.002235537 | 2027 |
| Sodium.resultn     | >= | 142.5       |                    |    |             | Missing       |    | Missing      | 0.000416801  | 2027 |
| psc.yrs.dur        | =  | Missing     |                    |    |             | Missing       |    | Missing      | 0.000512456  | 2028 |
| psc.yrs.dur        | <  | 15.54004107 | AST.resultn        | =  | Missing     | Missing       |    | Missing      | 0.000437918  | 2028 |
| psc.yrs.dur        | <  | 15.54004107 | AST.resultn        | <  | 213.5       | TBILL.resultn | =  | Missing      | 0.000382872  | 2028 |
| psc.yrs.dur        | <  | 15.54004107 | AST.resultn        | <  | 213.5       | TBILL.resultn | <  | 2.6          | 0.000413349  | 2028 |
| psc.yrs.dur        | <  | 15.54004107 | AST.resultn        | <  | 213.5       | TBILL.resultn | >= | 2.6          | 0            | 2028 |
| psc.yrs.dur        | <  | 15.54004107 | AST.resultn        | >= | 213.5       |               |    | Missing      | 0.001681969  | 2028 |
| psc.yrs.dur        | >= | 15.54004107 |                    |    |             | Missing       |    | Missing      | 0.002331167  | 2028 |
| AST.resultn        | =  | Missing     |                    |    |             | Missing       |    | Missing      | -0.001403854 | 2029 |

|                |    |             |               |    |             |                |              |              |              |      |
|----------------|----|-------------|---------------|----|-------------|----------------|--------------|--------------|--------------|------|
| AST.resultn    | <  | 133.5       | TBILL.resultn | =  | Missing     | Missing        | -0.000412319 | 2029         |              |      |
| AST.resultn    | <  | 133.5       | TBILL.resultn | <  | 1.65        | Missing        | -0.000699216 | 2029         |              |      |
| AST.resultn    | <  | 133.5       | TBILL.resultn | >= | 1.65        | ALB.resultn    | =            | Missing      | 0.001745645  | 2029 |
| AST.resultn    | <  | 133.5       | TBILL.resultn | >= | 1.65        | ALB.resultn    | <            | 3.545        | 0.00349129   | 2029 |
| AST.resultn    | <  | 133.5       | TBILL.resultn | >= | 1.65        | ALB.resultn    | >=           | 3.545        | 0            | 2029 |
| AST.resultn    | >= | 133.5       |               |    |             | Missing        | -0.000885954 | 2029         |              |      |
| psc.yrs.dur    | =  | Missing     |               |    |             | Missing        | 0.000872805  | 2030         |              |      |
| psc.yrs.dur    | <  | 16.5065024  | TBILL.resultn | =  | Missing     | Missing        | 0.001582735  | 2030         |              |      |
| psc.yrs.dur    | <  | 16.5065024  | TBILL.resultn | <  | 2.65        | Sodium.resultn | =            | Missing      | 0            | 2030 |
| psc.yrs.dur    | <  | 16.5065024  | TBILL.resultn | <  | 2.65        | Sodium.resultn | <            | 136.5        | 0.002129711  | 2030 |
| psc.yrs.dur    | <  | 16.5065024  | TBILL.resultn | <  | 2.65        | Sodium.resultn | >=           | 136.5        | 0.001182498  | 2030 |
| psc.yrs.dur    | <  | 16.5065024  | TBILL.resultn | >= | 2.65        |                | Missing      | 0.000250979  | 2030         |      |
| psc.yrs.dur    | >= | 16.5065024  |               |    |             | Missing        | 0.002565219  | 2030         |              |      |
| PLT.resultn    | =  | Missing     |               |    |             | Missing        | -0.001784181 | 2031         |              |      |
| PLT.resultn    | <  | 170         |               |    |             | Missing        | 0.000387048  | 2031         |              |      |
| PLT.resultn    | >= | 170         | TBILL.resultn | =  | Missing     | Missing        | -0.001545061 | 2031         |              |      |
| PLT.resultn    | >= | 170         | TBILL.resultn | <  | 2.55        | TBILL.resultn  | =            | Missing      | -0.001525079 | 2031 |
| PLT.resultn    | >= | 170         | TBILL.resultn | <  | 2.55        | TBILL.resultn  | <            | 1.55         | -0.001698591 | 2031 |
| PLT.resultn    | >= | 170         | TBILL.resultn | <  | 2.55        | TBILL.resultn  | >=           | 1.55         | 0            | 2031 |
| PLT.resultn    | >= | 170         | TBILL.resultn | >= | 2.55        |                | Missing      | -0.001751547 | 2031         |      |
| ALB.resultn    | =  | Missing     |               |    |             | Missing        | -0.00029214  | 2032         |              |      |
| ALB.resultn    | <  | 2.915       |               |    |             | Missing        | 0.000439975  | 2032         |              |      |
| ALB.resultn    | >= | 2.915       | AST.resultn   | =  | Missing     | Missing        | -0.000854408 | 2032         |              |      |
| ALB.resultn    | >= | 2.915       | AST.resultn   | <  | 144.5       | TBILL.resultn  | =            | Missing      | -0.000800472 | 2032 |
| ALB.resultn    | >= | 2.915       | AST.resultn   | <  | 144.5       | TBILL.resultn  | <            | 0.75         | -0.001528173 | 2032 |
| ALB.resultn    | >= | 2.915       | AST.resultn   | <  | 144.5       | TBILL.resultn  | >=           | 0.75         | 0            | 2032 |
| ALB.resultn    | >= | 2.915       | AST.resultn   | >= | 144.5       |                | Missing      | -0.001322674 | 2032         |      |
| age.yrs        | =  | Missing     |               |    |             | Missing        | 0.001134906  | 2033         |              |      |
| age.yrs        | <  | 68.91718001 | TBILL.resultn | =  | Missing     | Missing        | 0.001174274  | 2033         |              |      |
| age.yrs        | <  | 68.91718001 | TBILL.resultn | <  | 3.95        | ALB.resultn    | =            | Missing      | 0            | 2033 |
| age.yrs        | <  | 68.91718001 | TBILL.resultn | <  | 3.95        | ALB.resultn    | <            | 4.255        | 0.000607065  | 2033 |
| age.yrs        | <  | 68.91718001 | TBILL.resultn | <  | 3.95        | ALB.resultn    | >=           | 4.255        | 0.001870427  | 2033 |
| age.yrs        | <  | 68.91718001 | TBILL.resultn | >= | 3.95        |                | Missing      | 0.000295748  | 2033         |      |
| age.yrs        | >= | 68.91718001 |               |    |             | Missing        | 0.003230697  | 2033         |              |      |
| Sodium.resultn | =  | Missing     |               |    |             | Missing        | -0.001204536 | 2034         |              |      |
| Sodium.resultn | <  | 136.5       |               |    |             | Missing        | -0.000132979 | 2034         |              |      |
| Sodium.resultn | >= | 136.5       | age.yrs       | =  | Missing     | Missing        | -0.001365936 | 2034         |              |      |
| Sodium.resultn | >= | 136.5       | age.yrs       | <  | 67.2881588  | AST.resultn    | =            | Missing      | -0.001530037 | 2034 |
| Sodium.resultn | >= | 136.5       | age.yrs       | <  | 67.2881588  | AST.resultn    | <            | 109          | -0.001905329 | 2034 |
| Sodium.resultn | >= | 136.5       | age.yrs       | <  | 67.2881588  | AST.resultn    | >=           | 109          | 0            | 2034 |
| Sodium.resultn | >= | 136.5       | age.yrs       | >= | 67.2881588  |                | Missing      | 0.000833014  | 2034         |      |
| age.yrs        | =  | Missing     |               |    |             | Missing        | -0.001172067 | 2035         |              |      |
| age.yrs        | <  | 69.84257358 | ALB.resultn   | =  | Missing     | Missing        | -0.001978895 | 2035         |              |      |
| age.yrs        | <  | 69.84257358 | ALB.resultn   | <  | 3.225       |                | Missing      | -0.001519098 | 2035         |      |
| age.yrs        | <  | 69.84257358 | ALB.resultn   | >= | 3.225       | age.yrs        | =            | Missing      | -0.001187872 | 2035 |
| age.yrs        | <  | 69.84257358 | ALB.resultn   | >= | 3.225       | age.yrs        | <            | 51.58521561  | -0.001659766 | 2035 |
| age.yrs        | <  | 69.84257358 | ALB.resultn   | >= | 3.225       | age.yrs        | >=           | 51.58521561  | 0            | 2035 |
| age.yrs        | >= | 69.84257358 |               |    |             | Missing        | 0.001733948  | 2035         |              |      |
| TBILL.resultn  | =  | Missing     |               |    |             |                | -0.000625128 | 2036         |              |      |
| TBILL.resultn  | <  | 1.95        | ALK.times.uln | =  | Missing     |                | 0            | 2036         |              |      |
| TBILL.resultn  | <  | 1.95        | ALK.times.uln | <  | 3.635579421 |                | -0.000413467 | 2036         |              |      |
| TBILL.resultn  | <  | 1.95        | ALK.times.uln | >= | 3.635579421 |                | 0.000914219  | 2036         |              |      |
| TBILL.resultn  | >= | 1.95        | ALB.resultn   | =  | Missing     |                | 0.001113711  | 2036         |              |      |
| TBILL.resultn  | >= | 1.95        | ALB.resultn   | <  | 3.35        |                | 0.001874661  | 2036         |              |      |
| TBILL.resultn  | >= | 1.95        | ALB.resultn   | >= | 3.35        |                | 0.000590558  | 2036         |              |      |
| Sodium.resultn | =  | Missing     |               |    |             | Missing        | -0.003445842 | 2037         |              |      |
| Sodium.resultn | <  | 135.5       |               |    |             | Missing        | -0.00371834  | 2037         |              |      |
| Sodium.resultn | >= | 135.5       | age.yrs       | =  | Missing     | Missing        | -0.002526728 | 2037         |              |      |
| Sodium.resultn | >= | 135.5       | age.yrs       | <  | 53.46475017 |                | Missing      | -0.002945487 | 2037         |      |
| Sodium.resultn | >= | 135.5       | age.yrs       | >= | 53.46475017 | AST.resultn    | =            | Missing      | -0.00173194  | 2037 |
| Sodium.resultn | >= | 135.5       | age.yrs       | >= | 53.46475017 | AST.resultn    | <            | 51.5         | -0.003689784 | 2037 |
| Sodium.resultn | >= | 135.5       | age.yrs       | >= | 53.46475017 | AST.resultn    | >=           | 51.5         | 0            | 2037 |

|               |    |             |                |    |             |                |         |              |              |      |
|---------------|----|-------------|----------------|----|-------------|----------------|---------|--------------|--------------|------|
| ALK.times.uln | =  | Missing     | AST.resultn    | =  | Missing     |                |         | -0.001473065 | 2038         |      |
| ALK.times.uln | =  | Missing     | AST.resultn    | <  | 112.5       |                |         | -0.00191185  | 2038         |      |
| ALK.times.uln | =  | Missing     | AST.resultn    | >= | 112.5       |                |         | 0            | 2038         |      |
| ALK.times.uln | <  | 5.462893197 |                |    |             |                |         | -0.001439513 | 2038         |      |
| ALK.times.uln | >= | 5.462893197 | ALK.times.uln  | =  | Missing     |                |         | -0.00030888  | 2038         |      |
| ALK.times.uln | >= | 5.462893197 | ALK.times.uln  | <  | 7.850310559 |                |         | 0.000753625  | 2038         |      |
| ALK.times.uln | >= | 5.462893197 | ALK.times.uln  | >= | 7.850310559 |                |         | -0.001371384 | 2038         |      |
| age.yrs       | =  | Missing     |                |    |             | Missing        |         | -0.002832866 | 2039         |      |
| age.yrs       | <  | 69.76043806 | PLT.resultn    | =  | Missing     | Missing        |         | -0.002683804 | 2039         |      |
| age.yrs       | <  | 69.76043806 | PLT.resultn    | <  | 182.5       | age.yrs        | =       | Missing      | -0.001793176 | 2039 |
| age.yrs       | <  | 69.76043806 | PLT.resultn    | <  | 182.5       | age.yrs        | <       | 46.32991102  | -0.003944988 | 2039 |
| age.yrs       | <  | 69.76043806 | PLT.resultn    | <  | 182.5       | age.yrs        | >=      | 46.32991102  | 0            | 2039 |
| age.yrs       | <  | 69.76043806 | PLT.resultn    | >= | 182.5       |                | Missing | -0.003214187 | 2039         |      |
| age.yrs       | >= | 69.76043806 |                |    |             |                | Missing | 0.000296614  | 2039         |      |
| psc.yrs.dur   | =  | Missing     |                |    |             |                |         | 0.000879673  | 2040         |      |
| psc.yrs.dur   | <  | 6.592744695 | PLT.resultn    | =  | Missing     |                |         | 0            | 2040         |      |
| psc.yrs.dur   | <  | 6.592744695 | PLT.resultn    | <  | 185.5       |                |         | 0.002193211  | 2040         |      |
| psc.yrs.dur   | <  | 6.592744695 | PLT.resultn    | >= | 185.5       |                |         | 0.000792738  | 2040         |      |
| psc.yrs.dur   | >= | 6.592744695 | ALK.times.uln  | =  | Missing     |                |         | 0.001042506  | 2040         |      |
| psc.yrs.dur   | >= | 6.592744695 | ALK.times.uln  | <  | 2.11293294  |                |         | 4.32E-05     | 2040         |      |
| psc.yrs.dur   | >= | 6.592744695 | ALK.times.uln  | >= | 2.11293294  |                |         | 0.004194029  | 2040         |      |
| TBILL.resultn | =  | Missing     |                |    |             |                |         | -0.000735642 | 2041         |      |
| TBILL.resultn | <  | 2.45        | age.yrs        | =  | Missing     |                |         | -0.001204692 | 2041         |      |
| TBILL.resultn | <  | 2.45        | age.yrs        | <  | 56.10403833 |                |         | -0.00148533  | 2041         |      |
| TBILL.resultn | <  | 2.45        | age.yrs        | >= | 56.10403833 |                |         | 0            | 2041         |      |
| TBILL.resultn | >= | 2.45        | PLT.resultn    | =  | Missing     |                |         | -6.82E-05    | 2041         |      |
| TBILL.resultn | >= | 2.45        | PLT.resultn    | <  | 231         |                |         | 0.000490611  | 2041         |      |
| TBILL.resultn | >= | 2.45        | PLT.resultn    | >= | 231         |                |         | -0.000576238 | 2041         |      |
| age.yrs       | =  | Missing     |                |    |             | Missing        |         | 0.000756951  | 2042         |      |
| age.yrs       | <  | 69.71800137 | ALK.times.uln  | =  | Missing     | Sodium.resultn | =       | Missing      | 0            | 2042 |
| age.yrs       | <  | 69.71800137 | ALK.times.uln  | =  | Missing     | Sodium.resultn | <       | 140.5        | 0.001918595  | 2042 |
| age.yrs       | <  | 69.71800137 | ALK.times.uln  | =  | Missing     | Sodium.resultn | >=      | 140.5        | 0.000754796  | 2042 |
| age.yrs       | <  | 69.71800137 | ALK.times.uln  | <  | 5.462893197 |                | Missing | 0.000468746  | 2042         |      |
| age.yrs       | <  | 69.71800137 | ALK.times.uln  | >= | 5.462893197 |                | Missing | 0.001627705  | 2042         |      |
| age.yrs       | >= | 69.71800137 |                |    |             |                | Missing | 0.002372809  | 2042         |      |
| psc.yrs.dur   | =  | Missing     |                |    |             |                |         | 0.000659593  | 2043         |      |
| psc.yrs.dur   | <  | 6.324435318 | AST.resultn    | =  | Missing     |                |         | 0.000517305  | 2043         |      |
| psc.yrs.dur   | <  | 6.324435318 | AST.resultn    | <  | 64          |                |         | 0.000932041  | 2043         |      |
| psc.yrs.dur   | <  | 6.324435318 | AST.resultn    | >= | 64          |                |         | 0            | 2043         |      |
| psc.yrs.dur   | >= | 6.324435318 | AST.resultn    | =  | Missing     |                |         | 0.00149409   | 2043         |      |
| psc.yrs.dur   | >= | 6.324435318 | AST.resultn    | <  | 44.5        |                |         | 5.73E-05     | 2043         |      |
| psc.yrs.dur   | >= | 6.324435318 | AST.resultn    | >= | 44.5        |                |         | 0.003099944  | 2043         |      |
| ALK.times.uln | =  | Missing     | TBILL.resultn  | =  | Missing     |                |         | 5.70E-05     | 2044         |      |
| ALK.times.uln | =  | Missing     | TBILL.resultn  | <  | 1.45        |                |         | 0.000324201  | 2044         |      |
| ALK.times.uln | =  | Missing     | TBILL.resultn  | >= | 1.45        |                |         | 0.002542296  | 2044         |      |
| ALK.times.uln | <  | 5.462893197 | TBILL.resultn  | =  | Missing     |                |         | 0.000513217  | 2044         |      |
| ALK.times.uln | <  | 5.462893197 | TBILL.resultn  | <  | 2.45        |                |         | 0.000543766  | 2044         |      |
| ALK.times.uln | <  | 5.462893197 | TBILL.resultn  | >= | 2.45        |                |         | 0            | 2044         |      |
| ALK.times.uln | >= | 5.462893197 |                |    |             |                |         | 0.001896931  | 2044         |      |
| TBILL.resultn | =  | Missing     |                |    |             |                |         | 2.85E-05     | 2045         |      |
| TBILL.resultn | <  | 2.05        | Sodium.resultn | =  | Missing     |                |         | 0            | 2045         |      |
| TBILL.resultn | <  | 2.05        | Sodium.resultn | <  | 136.5       |                |         | 1.94E-05     | 2045         |      |
| TBILL.resultn | <  | 2.05        | Sodium.resultn | >= | 136.5       |                |         | 0.001311532  | 2045         |      |
| TBILL.resultn | >= | 2.05        | AST.resultn    | =  | Missing     |                |         | 0.001560508  | 2045         |      |
| TBILL.resultn | >= | 2.05        | AST.resultn    | <  | 148         |                |         | 0.002021577  | 2045         |      |
| TBILL.resultn | >= | 2.05        | AST.resultn    | >= | 148         |                |         | 0.001141354  | 2045         |      |
| PLT.resultn   | =  | Missing     |                |    |             |                |         | 0.000645585  | 2046         |      |
| PLT.resultn   | <  | 217         | TBILL.resultn  | =  | Missing     |                |         | 0.001120706  | 2046         |      |
| PLT.resultn   | <  | 217         | TBILL.resultn  | <  | 1.6         |                |         | 0.000938374  | 2046         |      |
| PLT.resultn   | <  | 217         | TBILL.resultn  | >= | 1.6         |                |         | 0.0016014    | 2046         |      |
| PLT.resultn   | >= | 217         | psc.yrs.dur    | =  | Missing     |                |         | 0.000232252  | 2046         |      |
| PLT.resultn   | >= | 217         | psc.yrs.dur    | <  | 0.042436687 |                |         | 0.001556948  | 2046         |      |



|                |    |                         |    |                           |    |             |              |      |
|----------------|----|-------------------------|----|---------------------------|----|-------------|--------------|------|
| PLT.resultn    | >= | 217 psc.yrs.dur         | >= | 0.042436687               |    |             | 0            | 2046 |
| TBILL.resultn  | =  | Missing                 |    |                           |    | Missing     | -0.00248995  | 2047 |
| TBILL.resultn  | <  | 3.5 AST.resultn         | =  | Missing                   |    | Missing     | -0.002992148 | 2047 |
| TBILL.resultn  | <  | 3.5 AST.resultn         | <  | 57.5                      |    | Missing     | -0.003788545 | 2047 |
| TBILL.resultn  | <  | 3.5 AST.resultn         | >= | 57.5 PLT.resultn          | =  | Missing     | 0            | 2047 |
| TBILL.resultn  | <  | 3.5 AST.resultn         | >= | 57.5 PLT.resultn          | <  | 249.5       | -0.001293932 | 2047 |
| TBILL.resultn  | <  | 3.5 AST.resultn         | >= | 57.5 PLT.resultn          | >= | 249.5       | -0.003255639 | 2047 |
| TBILL.resultn  | >= | 3.5                     |    |                           |    | Missing     | -0.00349522  | 2047 |
| TBILL.resultn  | =  | Missing                 |    |                           |    | Missing     | 0.001618797  | 2048 |
| TBILL.resultn  | <  | 3.5 ALK.times.uln       | =  | Missing AST.resultn       | =  | Missing     | 0.000567209  | 2048 |
| TBILL.resultn  | <  | 3.5 ALK.times.uln       | =  | Missing AST.resultn       | <  | 77.5        | 0.000784084  | 2048 |
| TBILL.resultn  | <  | 3.5 ALK.times.uln       | =  | Missing AST.resultn       | >= | 77.5        | 0            | 2048 |
| TBILL.resultn  | <  | 3.5 ALK.times.uln       | <  | 5.462893197               |    | Missing     | 0.00010232   | 2048 |
| TBILL.resultn  | <  | 3.5 ALK.times.uln       | >= | 5.462893197               |    | Missing     | 0.001461715  | 2048 |
| TBILL.resultn  | >= | 3.5                     |    |                           |    | Missing     | 0.001596811  | 2048 |
| Sodium.resultn | =  | Missing                 |    |                           |    | Missing     | -0.002259153 | 2049 |
| Sodium.resultn | <  | 136.5                   |    |                           |    | Missing     | 8.25E-05     | 2049 |
| Sodium.resultn | >= | 136.5 psc.yrs.dur       | =  | Missing                   |    | Missing     | -0.001944942 | 2049 |
| Sodium.resultn | >= | 136.5 psc.yrs.dur       | <  | 0.832306639               |    | Missing     | -0.002389236 | 2049 |
| Sodium.resultn | >= | 136.5 psc.yrs.dur       | >= | 0.832306639 AST.resultn   | =  | Missing     | -0.001375689 | 2049 |
| Sodium.resultn | >= | 136.5 psc.yrs.dur       | >= | 0.832306639 AST.resultn   | <  | 88          | -0.002063534 | 2049 |
| Sodium.resultn | >= | 136.5 psc.yrs.dur       | >= | 0.832306639 AST.resultn   | >= | 88          | 0            | 2049 |
| psc.yrs.dur    | =  | Missing                 |    |                           |    | Missing     | -0.000995303 | 2050 |
| psc.yrs.dur    | <  | 1.916495551             |    |                           |    | Missing     | -0.001297349 | 2050 |
| psc.yrs.dur    | >= | 1.916495551 psc.yrs.dur | =  | Missing                   |    | Missing     | -0.000361743 | 2050 |
| psc.yrs.dur    | >= | 1.916495551 psc.yrs.dur | <  | 2.902121834               |    | Missing     | 0.00259088   | 2050 |
| psc.yrs.dur    | >= | 1.916495551 psc.yrs.dur | >= | 2.902121834 AST.resultn   | =  | Missing     | -0.000867907 | 2050 |
| psc.yrs.dur    | >= | 1.916495551 psc.yrs.dur | >= | 2.902121834 AST.resultn   | <  | 98          | -0.001145637 | 2050 |
| psc.yrs.dur    | >= | 1.916495551 psc.yrs.dur | >= | 2.902121834 AST.resultn   | >= | 98          | 0            | 2050 |
| Sodium.resultn | =  | Missing                 |    |                           |    |             | 0.000649535  | 2051 |
| Sodium.resultn | <  | 138.5 age.yrs           | =  | Missing                   |    |             | 0.001268689  | 2051 |
| Sodium.resultn | <  | 138.5 age.yrs           | <  | 48.76933607               |    |             | 0.000152373  | 2051 |
| Sodium.resultn | <  | 138.5 age.yrs           | >= | 48.76933607               |    |             | 0.003067198  | 2051 |
| Sodium.resultn | >= | 138.5 ALK.times.uln     | =  | Missing                   |    |             | 0            | 2051 |
| Sodium.resultn | >= | 138.5 ALK.times.uln     | <  | 5.963877551               |    |             | -0.000345925 | 2051 |
| Sodium.resultn | >= | 138.5 ALK.times.uln     | >= | 5.963877551               |    |             | 0.001435295  | 2051 |
| TBILL.resultn  | =  | Missing                 |    |                           |    | Missing     | -0.001013212 | 2052 |
| TBILL.resultn  | <  | 0.75                    |    |                           |    | Missing     | -0.00222647  | 2052 |
| TBILL.resultn  | >= | 0.75 Hemoglobin.resultn | =  | Missing                   |    | Missing     | 0.000132547  | 2052 |
| TBILL.resultn  | >= | 0.75 Hemoglobin.resultn | <  | 12.25                     |    | Missing     | -0.00138773  | 2052 |
| TBILL.resultn  | >= | 0.75 Hemoglobin.resultn | >= | 12.25 ALK.times.uln       | =  | Missing     | -0.001322807 | 2052 |
| TBILL.resultn  | >= | 0.75 Hemoglobin.resultn | >= | 12.25 ALK.times.uln       | <  | 2.815208295 | -0.00185193  | 2052 |
| TBILL.resultn  | >= | 0.75 Hemoglobin.resultn | >= | 12.25 ALK.times.uln       | >= | 2.815208295 | 0            | 2052 |
| Sodium.resultn | =  | Missing                 |    |                           |    |             | 0.00040676   | 2053 |
| Sodium.resultn | <  | 141.5 ALK.times.uln     | =  | Missing                   |    |             | 0.001045355  | 2053 |
| Sodium.resultn | <  | 141.5 ALK.times.uln     | <  | 5.265120427               |    |             | 0.000715324  | 2053 |
| Sodium.resultn | <  | 141.5 ALK.times.uln     | >= | 5.265120427               |    |             | 0.001961542  | 2053 |
| Sodium.resultn | >= | 141.5 AST.resultn       | =  | Missing                   |    |             | -0.000285805 | 2053 |
| Sodium.resultn | >= | 141.5 AST.resultn       | <  | 78                        |    |             | -0.000378    | 2053 |
| Sodium.resultn | >= | 141.5 AST.resultn       | >= | 78                        |    |             | 0            | 2053 |
| AST.resultn    | =  | Missing                 |    |                           |    | Missing     | -0.001035757 | 2054 |
| AST.resultn    | <  | 71.5 AST.resultn        | =  | Missing                   |    | Missing     | 0.00020399   | 2054 |
| AST.resultn    | <  | 71.5 AST.resultn        | <  | 57.5                      |    | Missing     | -0.000379529 | 2054 |
| AST.resultn    | <  | 71.5 AST.resultn        | >= | 57.5 PLT.resultn          | =  | Missing     | 0.002499167  | 2054 |
| AST.resultn    | <  | 71.5 AST.resultn        | >= | 57.5 PLT.resultn          | <  | 259         | 0.005907122  | 2054 |
| AST.resultn    | <  | 71.5 AST.resultn        | >= | 57.5 PLT.resultn          | >= | 259         | 0            | 2054 |
| AST.resultn    | >= | 71.5                    |    |                           |    | Missing     | -0.000414992 | 2054 |
| ALB.resultn    | =  | Missing                 |    |                           |    | Missing     | 0.001537866  | 2055 |
| ALB.resultn    | <  | 2.915                   |    |                           |    | Missing     | 0.001612882  | 2055 |
| ALB.resultn    | >= | 2.915 psc.yrs.dur       | =  | Missing                   |    | Missing     | 0.000516518  | 2055 |
| ALB.resultn    | >= | 2.915 psc.yrs.dur       | <  | 6.324435318 TBILL.resultn | =  | Missing     | 0.000309024  | 2055 |
| ALB.resultn    | >= | 2.915 psc.yrs.dur       | <  | 6.324435318 TBILL.resultn | <  | 2.65        | 0.000327909  | 2055 |

|                |    |                            |    |                           |               |             |              |              |      |
|----------------|----|----------------------------|----|---------------------------|---------------|-------------|--------------|--------------|------|
| ALB.resultn    | >= | 2.915 psc.yrs.dur          | <  | 6.324435318 TBILI.resultn | >=            | 2.65        | 0            | 2055         |      |
| ALB.resultn    | >= | 2.915 psc.yrs.dur          | >= | 6.324435318               | Missing       |             | 0.001897423  | 2055         |      |
| AST.resultn    | =  | Missing                    |    |                           | Missing       |             | -0.003293853 | 2056         |      |
| AST.resultn    | <  | 58.5                       |    |                           | Missing       |             | -0.003269903 | 2056         |      |
| AST.resultn    | >= | 58.5 PLT.resultn           | =  | Missing                   | Missing       |             | -0.001090359 | 2056         |      |
| AST.resultn    | >= | 58.5 PLT.resultn           | <  | 218.5 TBILI.resultn       | =             | Missing     | -0.001190822 | 2056         |      |
| AST.resultn    | >= | 58.5 PLT.resultn           | <  | 218.5 TBILI.resultn       | <             | 1.65        | -0.00181757  | 2056         |      |
| AST.resultn    | >= | 58.5 PLT.resultn           | <  | 218.5 TBILI.resultn       | >=            | 1.65        | 0            | 2056         |      |
| AST.resultn    | >= | 58.5 PLT.resultn           | >= | 218.5                     | Missing       |             | -0.002256498 | 2056         |      |
| age.yrs        | =  | Missing                    |    |                           | Missing       |             | 0.000493375  | 2057         |      |
| age.yrs        | <  | 69.51266256 Sodium.resultn | =  | Missing                   | Missing       |             | -0.000165439 | 2057         |      |
| age.yrs        | <  | 69.51266256 Sodium.resultn | <  | 136.5                     | Missing       |             | 0.001389045  | 2057         |      |
| age.yrs        | <  | 69.51266256 Sodium.resultn | >= | 136.5 TBILI.resultn       | =             | Missing     | 0.000592438  | 2057         |      |
| age.yrs        | <  | 69.51266256 Sodium.resultn | >= | 136.5 TBILI.resultn       | <             | 1.45        | 0.000813855  | 2057         |      |
| age.yrs        | <  | 69.51266256 Sodium.resultn | >= | 136.5 TBILI.resultn       | >=            | 1.45        | 0            | 2057         |      |
| age.yrs        | >= | 69.51266256                |    |                           | Missing       |             | 0.002849201  | 2057         |      |
| TBILI.resultn  | =  | Missing                    |    |                           | Missing       |             | -0.000347566 | 2058         |      |
| TBILI.resultn  | <  | 1.25                       |    |                           | Missing       |             | -0.00054397  | 2058         |      |
| TBILI.resultn  | >= | 1.25 Hemoglobin.resultn    | =  | Missing                   | AST.resultn   | =           | Missing      | 0.001306969  | 2058 |
| TBILI.resultn  | >= | 1.25 Hemoglobin.resultn    | =  | Missing                   | AST.resultn   | <           | 78           | 0.002613938  | 2058 |
| TBILI.resultn  | >= | 1.25 Hemoglobin.resultn    | =  | Missing                   | AST.resultn   | >=          | 78           | 0            | 2058 |
| TBILI.resultn  | >= | 1.25 Hemoglobin.resultn    | <  | 13.75                     | Missing       |             | 0.000470616  | 2058         |      |
| TBILI.resultn  | >= | 1.25 Hemoglobin.resultn    | >= | 13.75                     | Missing       |             | -0.000970635 | 2058         |      |
| TBILI.resultn  | =  | Missing                    |    |                           | Missing       |             | 0.001746692  | 2059         |      |
| TBILI.resultn  | <  | 3.25 ALK.times.uln         | =  | Missing                   | ALB.resultn   | =           | Missing      | 0.000763365  | 2059 |
| TBILI.resultn  | <  | 3.25 ALK.times.uln         | =  | Missing                   | ALB.resultn   | <           | 3.95         | 0.002835355  | 2059 |
| TBILI.resultn  | <  | 3.25 ALK.times.uln         | =  | Missing                   | ALB.resultn   | >=          | 3.95         | 0            | 2059 |
| TBILI.resultn  | <  | 3.25 ALK.times.uln         | <  | 7.005248571               | Missing       |             | 0.000878813  | 2059         |      |
| TBILI.resultn  | <  | 3.25 ALK.times.uln         | >= | 7.005248571               | Missing       |             | 0.002216406  | 2059         |      |
| TBILI.resultn  | >= | 3.25                       |    |                           | Missing       |             | 0.000411026  | 2059         |      |
| ALB.resultn    | =  | Missing                    |    |                           |               |             | -0.000378763 | 2060         |      |
| ALB.resultn    | <  | 3.31 TBILI.resultn         | =  | Missing                   |               |             | 0.001058429  | 2060         |      |
| ALB.resultn    | <  | 3.31 TBILI.resultn         | <  | 1.2                       |               |             | 0.000553548  | 2060         |      |
| ALB.resultn    | <  | 3.31 TBILI.resultn         | >= | 1.2                       |               |             | 0.001765264  | 2060         |      |
| ALB.resultn    | >= | 3.31 TBILI.resultn         | =  | Missing                   |               |             | 0.000577025  | 2060         |      |
| ALB.resultn    | >= | 3.31 TBILI.resultn         | <  | 2.6                       |               |             | 0.000617139  | 2060         |      |
| ALB.resultn    | >= | 3.31 TBILI.resultn         | >= | 2.6                       |               |             | 0            | 2060         |      |
| AST.resultn    | =  | Missing                    |    |                           | Missing       |             | -0.002670062 | 2061         |      |
| AST.resultn    | <  | 213.5 Hemoglobin.resultn   | =  | Missing                   | TBILI.resultn | =           | Missing      | -0.002113416 | 2061 |
| AST.resultn    | <  | 213.5 Hemoglobin.resultn   | =  | Missing                   | TBILI.resultn | <           | 1.15         | -0.002669578 | 2061 |
| AST.resultn    | <  | 213.5 Hemoglobin.resultn   | =  | Missing                   | TBILI.resultn | >=          | 1.15         | 0            | 2061 |
| AST.resultn    | <  | 213.5 Hemoglobin.resultn   | <  | 14.15                     | Missing       |             | -0.001353291 | 2061         |      |
| AST.resultn    | <  | 213.5 Hemoglobin.resultn   | >= | 14.15                     | Missing       |             | -0.002677965 | 2061         |      |
| AST.resultn    | >= | 213.5                      |    |                           | Missing       |             | -0.000284424 | 2061         |      |
| ALK.times.uln  | =  | Missing                    |    |                           | Missing       |             | 0.000716679  | 2062         |      |
| ALK.times.uln  | <  | 5.446215139 ALB.resultn    | =  | Missing                   | Missing       |             | 0.000770374  | 2062         |      |
| ALK.times.uln  | <  | 5.446215139 ALB.resultn    | <  | 4.25                      | Missing       |             | 0.0005097    | 2062         |      |
| ALK.times.uln  | <  | 5.446215139 ALB.resultn    | >= | 4.25 ALB.resultn          | =             | Missing     | 0.001136097  | 2062         |      |
| ALK.times.uln  | <  | 5.446215139 ALB.resultn    | >= | 4.25 ALB.resultn          | <             | 4.35        | 0.005074568  | 2062         |      |
| ALK.times.uln  | <  | 5.446215139 ALB.resultn    | >= | 4.25 ALB.resultn          | >=            | 4.35        | 0            | 2062         |      |
| ALK.times.uln  | >= | 5.446215139                |    |                           | Missing       |             | 0.001947203  | 2062         |      |
| Sodium.resultn | =  | Missing                    |    |                           | Missing       |             | -0.003076892 | 2063         |      |
| Sodium.resultn | <  | 138.5 TBILI.resultn        | =  | Missing                   | Missing       |             | -0.002190742 | 2063         |      |
| Sodium.resultn | <  | 138.5 TBILI.resultn        | <  | 0.75                      | Missing       |             | -0.003437205 | 2063         |      |
| Sodium.resultn | <  | 138.5 TBILI.resultn        | >= | 0.75 psc.yrs.dur          | =             | Missing     | -0.001246452 | 2063         |      |
| Sodium.resultn | <  | 138.5 TBILI.resultn        | >= | 0.75 psc.yrs.dur          | <             | 1.745379877 | -0.002419583 | 2063         |      |
| Sodium.resultn | <  | 138.5 TBILI.resultn        | >= | 0.75 psc.yrs.dur          | >=            | 1.745379877 | 0            | 2063         |      |
| Sodium.resultn | >= | 138.5                      |    |                           | Missing       |             | -0.002621167 | 2063         |      |
| PLT.resultn    | =  | Missing                    |    |                           | Missing       |             | -0.002323882 | 2064         |      |
| PLT.resultn    | <  | 170                        |    |                           | Missing       |             | 6.14E-05     | 2064         |      |
| PLT.resultn    | >= | 170 TBILI.resultn          | =  | Missing                   | Missing       |             | -0.000703362 | 2064         |      |
| PLT.resultn    | >= | 170 TBILI.resultn          | <  | 1.15 psc.yrs.dur          | =             | Missing     | -0.001927311 | 2064         |      |

|               |    |             |                    |    |             |               |         |             |              |      |
|---------------|----|-------------|--------------------|----|-------------|---------------|---------|-------------|--------------|------|
| PLT.resultn   | >= | 170         | TBILL.resultn      | <  | 1.15        | psc.yrs.dur   | <       | 1.891854894 | -0.002647801 | 2064 |
| PLT.resultn   | >= | 170         | TBILL.resultn      | <  | 1.15        | psc.yrs.dur   | >=      | 1.891854894 | 0            | 2064 |
| PLT.resultn   | >= | 170         | TBILL.resultn      | >= | 1.15        |               | Missing |             | -0.002356954 | 2064 |
| psc.yrs.dur   | =  | Missing     |                    |    |             |               |         |             | 0.000337369  | 2065 |
| psc.yrs.dur   | <  | 7.823408624 | Sodium.resultn     | =  | Missing     |               |         |             | 0            | 2065 |
| psc.yrs.dur   | <  | 7.823408624 | Sodium.resultn     | <  | 137.5       |               |         |             | 0.001167779  | 2065 |
| psc.yrs.dur   | <  | 7.823408624 | Sodium.resultn     | >= | 137.5       |               |         |             | 9.25E-05     | 2065 |
| psc.yrs.dur   | >= | 7.823408624 | ALB.resultn        | =  | Missing     |               |         |             | 0.001594777  | 2065 |
| psc.yrs.dur   | >= | 7.823408624 | ALB.resultn        | <  | 3.95        |               |         |             | 0.002924482  | 2065 |
| psc.yrs.dur   | >= | 7.823408624 | ALB.resultn        | >= | 3.95        |               |         |             | 0.000571926  | 2065 |
| ALB.resultn   | =  | Missing     |                    |    |             |               | Missing |             | -0.002289893 | 2066 |
| ALB.resultn   | <  | 2.95        |                    |    |             |               | Missing |             | -0.001424216 | 2066 |
| ALB.resultn   | >= | 2.95        | age.yrs            | =  | Missing     |               | Missing |             | -0.002398902 | 2066 |
| ALB.resultn   | >= | 2.95        | age.yrs            | <  | 53.56741958 |               | Missing |             | -0.002633143 | 2066 |
| ALB.resultn   | >= | 2.95        | age.yrs            | >= | 53.56741958 | TBILL.resultn | =       | Missing     | -0.001799861 | 2066 |
| ALB.resultn   | >= | 2.95        | age.yrs            | >= | 53.56741958 | TBILL.resultn | <       | 1.35        | -0.002159834 | 2066 |
| ALB.resultn   | >= | 2.95        | age.yrs            | >= | 53.56741958 | TBILL.resultn | >=      | 1.35        | 0            | 2066 |
| psc.yrs.dur   | =  | Missing     |                    |    |             |               | Missing |             | -0.003589807 | 2067 |
| psc.yrs.dur   | <  | 1.916495551 |                    |    |             |               | Missing |             | -0.003980704 | 2067 |
| psc.yrs.dur   | >= | 1.916495551 | age.yrs            | =  | Missing     |               | Missing |             | -0.002739606 | 2067 |
| psc.yrs.dur   | >= | 1.916495551 | age.yrs            | <  | 53.4715948  |               | Missing |             | -0.003040074 | 2067 |
| psc.yrs.dur   | >= | 1.916495551 | age.yrs            | >= | 53.4715948  | AST.resultn   | =       | Missing     | -0.002038513 | 2067 |
| psc.yrs.dur   | >= | 1.916495551 | age.yrs            | >= | 53.4715948  | AST.resultn   | <       | 57.5        | -0.004077027 | 2067 |
| psc.yrs.dur   | >= | 1.916495551 | age.yrs            | >= | 53.4715948  | AST.resultn   | >=      | 57.5        | 0            | 2067 |
| ALK.times.uln | =  | Missing     |                    |    |             |               |         |             | 0.000374473  | 2068 |
| ALK.times.uln | <  | 5.462893197 | Sodium.resultn     | =  | Missing     |               |         |             | 0            | 2068 |
| ALK.times.uln | <  | 5.462893197 | Sodium.resultn     | <  | 138.5       |               |         |             | 0.001784222  | 2068 |
| ALK.times.uln | <  | 5.462893197 | Sodium.resultn     | >= | 138.5       |               |         |             | -0.000292249 | 2068 |
| ALK.times.uln | >= | 5.462893197 | Hemoglobin.resultn | =  | Missing     |               |         |             | 0.001668112  | 2068 |
| ALK.times.uln | >= | 5.462893197 | Hemoglobin.resultn | <  | 12.4        |               |         |             | 0.000962976  | 2068 |
| ALK.times.uln | >= | 5.462893197 | Hemoglobin.resultn | >= | 12.4        |               |         |             | 0.002309146  | 2068 |
| TBILL.resultn | =  | Missing     |                    |    |             |               |         |             | 0.000530161  | 2069 |
| TBILL.resultn | <  | 2.65        | ALB.resultn        | =  | Missing     |               |         |             | -0.000491566 | 2069 |
| TBILL.resultn | <  | 2.65        | ALB.resultn        | <  | 3.135       |               |         |             | 0.002614111  | 2069 |
| TBILL.resultn | <  | 2.65        | ALB.resultn        | >= | 3.135       |               |         |             | 0.00060537   | 2069 |
| TBILL.resultn | >= | 2.65        | age.yrs            | =  | Missing     |               |         |             | 0.000234125  | 2069 |
| TBILL.resultn | >= | 2.65        | age.yrs            | <  | 47.42915811 |               |         |             | 0.00046825   | 2069 |
| TBILL.resultn | >= | 2.65        | age.yrs            | >= | 47.42915811 |               |         |             | 0            | 2069 |
| ALK.times.uln | =  | Missing     |                    |    |             |               | Missing |             | 0.000619192  | 2070 |
| ALK.times.uln | <  | 5.462893197 | age.yrs            | =  | Missing     |               | Missing |             | 0.000473659  | 2070 |
| ALK.times.uln | <  | 5.462893197 | age.yrs            | <  | 69.84257358 | PLT.resultn   | =       | Missing     | 0.00027725   | 2070 |
| ALK.times.uln | <  | 5.462893197 | age.yrs            | <  | 69.84257358 | PLT.resultn   | <       | 209.5       | 0.001813677  | 2070 |
| ALK.times.uln | <  | 5.462893197 | age.yrs            | <  | 69.84257358 | PLT.resultn   | >=      | 209.5       | 0            | 2070 |
| ALK.times.uln | <  | 5.462893197 | age.yrs            | >= | 69.84257358 |               | Missing |             | 0.003734043  | 2070 |
| ALK.times.uln | >= | 5.462893197 |                    |    |             |               | Missing |             | 0.00216496   | 2070 |
| ALB.resultn   | =  | Missing     |                    |    |             |               | Missing |             | -0.001020779 | 2071 |
| ALB.resultn   | <  | 2.95        |                    |    |             |               | Missing |             | -4.25E-05    | 2071 |
| ALB.resultn   | >= | 2.95        | ALB.resultn        | =  | Missing     |               | Missing |             | -0.000786275 | 2071 |
| ALB.resultn   | >= | 2.95        | ALB.resultn        | <  | 3.185       |               | Missing |             | -0.001177798 | 2071 |
| ALB.resultn   | >= | 2.95        | ALB.resultn        | >= | 3.185       | TBILL.resultn | =       | Missing     | -0.000766699 | 2071 |
| ALB.resultn   | >= | 2.95        | ALB.resultn        | >= | 3.185       | TBILL.resultn | <       | 0.75        | -0.001556868 | 2071 |
| ALB.resultn   | >= | 2.95        | ALB.resultn        | >= | 3.185       | TBILL.resultn | >=      | 0.75        | 0            | 2071 |
| TBILL.resultn | =  | Missing     |                    |    |             |               |         |             | 0.000846849  | 2072 |
| TBILL.resultn | <  | 2.45        | ALK.times.uln      | =  | Missing     |               |         |             | 0            | 2072 |
| TBILL.resultn | <  | 2.45        | ALK.times.uln      | <  | 3.832160896 |               |         |             | -0.001095794 | 2072 |
| TBILL.resultn | <  | 2.45        | ALK.times.uln      | >= | 3.832160896 |               |         |             | -0.001416391 | 2072 |
| TBILL.resultn | >= | 2.45        | age.yrs            | =  | Missing     |               |         |             | -0.000290515 | 2072 |
| TBILL.resultn | >= | 2.45        | age.yrs            | <  | 45.46748802 |               |         |             | -0.001421811 | 2072 |
| TBILL.resultn | >= | 2.45        | age.yrs            | >= | 45.46748802 |               |         |             | 0.000840781  | 2072 |
| PLT.resultn   | =  | Missing     |                    |    |             |               |         |             | -0.00124239  | 2073 |
| PLT.resultn   | <  | 209.5       | ALK.times.uln      | =  | Missing     |               |         |             | -0.001277593 | 2073 |
| PLT.resultn   | <  | 209.5       | ALK.times.uln      | <  | 2.440694925 |               |         |             | -0.001770992 | 2073 |

|                |    |             |                    |    |             |                |         |              |              |      |
|----------------|----|-------------|--------------------|----|-------------|----------------|---------|--------------|--------------|------|
| PLT.resultn    | <  | 209.5       | ALK.times.uln      | >= | 2.440694925 |                |         | 0.000803854  | 2073         |      |
| PLT.resultn    | >= | 209.5       | age.yrs            | =  | Missing     |                |         | -0.001791674 | 2073         |      |
| PLT.resultn    | >= | 209.5       | age.yrs            | <  | 56.60643395 |                |         | -0.002175604 | 2073         |      |
| PLT.resultn    | >= | 209.5       | age.yrs            | >= | 56.60643395 |                |         | 0            | 2073         |      |
| ALB.resultn    | =  | Missing     |                    |    |             | Missing        |         | 1.04E-05     | 2074         |      |
| ALB.resultn    | <  | 2.95        |                    |    |             | Missing        |         | 0.002147466  | 2074         |      |
| ALB.resultn    | >= | 2.95        | TBILL.resultn      | =  | Missing     | Missing        |         | 0.000679667  | 2074         |      |
| ALB.resultn    | >= | 2.95        | TBILL.resultn      | <  | 1.95        | Sodium.resultn | =       | Missing      | 0            | 2074 |
| ALB.resultn    | >= | 2.95        | TBILL.resultn      | <  | 1.95        | Sodium.resultn | <       | 136.5        | 0.002122694  | 2074 |
| ALB.resultn    | >= | 2.95        | TBILL.resultn      | <  | 1.95        | Sodium.resultn | >=      | 136.5        | 0.000956835  | 2074 |
| ALB.resultn    | >= | 2.95        | TBILL.resultn      | >= | 1.95        |                | Missing |              | 0.000428217  | 2074 |
| psc.yrs.dur    | =  | Missing     |                    |    |             |                |         | -0.001578726 | 2075         |      |
| psc.yrs.dur    | <  | 7.330595483 | TBILL.resultn      | =  | Missing     |                |         | 0            | 2075         |      |
| psc.yrs.dur    | <  | 7.330595483 | TBILL.resultn      | <  | 1.95        |                |         | -0.001781266 | 2075         |      |
| psc.yrs.dur    | <  | 7.330595483 | TBILL.resultn      | >= | 1.95        |                |         | -0.001835785 | 2075         |      |
| psc.yrs.dur    | >= | 7.330595483 | AST.resultn        | =  | Missing     |                |         | -0.001195638 | 2075         |      |
| psc.yrs.dur    | >= | 7.330595483 | AST.resultn        | <  | 43          |                |         | -0.002313912 | 2075         |      |
| psc.yrs.dur    | >= | 7.330595483 | AST.resultn        | >= | 43          |                |         | -0.000195077 | 2075         |      |
| ALB.resultn    | =  | Missing     |                    |    |             | Missing        |         | -0.00184066  | 2076         |      |
| ALB.resultn    | <  | 2.915       |                    |    |             | Missing        |         | -0.000484267 | 2076         |      |
| ALB.resultn    | >= | 2.915       | age.yrs            | =  | Missing     | Missing        |         | -0.002204155 | 2076         |      |
| ALB.resultn    | >= | 2.915       | age.yrs            | <  | 54.3504449  | Missing        |         | -0.002412269 | 2076         |      |
| ALB.resultn    | >= | 2.915       | age.yrs            | >= | 54.3504449  | TBILL.resultn  | =       | Missing      | -0.001516107 | 2076 |
| ALB.resultn    | >= | 2.915       | age.yrs            | >= | 54.3504449  | TBILL.resultn  | <       | 1.25         | -0.001954981 | 2076 |
| ALB.resultn    | >= | 2.915       | age.yrs            | >= | 54.3504449  | TBILL.resultn  | >=      | 1.25         | 0            | 2076 |
| psc.yrs.dur    | =  | Missing     |                    |    |             |                |         | 4.46E-05     | 2077         |      |
| psc.yrs.dur    | <  | 8.202600958 | Hemoglobin.resultn | =  | Missing     |                |         | 0            | 2077         |      |
| psc.yrs.dur    | <  | 8.202600958 | Hemoglobin.resultn | <  | 11.75       |                |         | -0.001006586 | 2077         |      |
| psc.yrs.dur    | <  | 8.202600958 | Hemoglobin.resultn | >= | 11.75       |                |         | -9.47E-05    | 2077         |      |
| psc.yrs.dur    | >= | 8.202600958 | Sodium.resultn     | =  | Missing     |                |         | 0.001418584  | 2077         |      |
| psc.yrs.dur    | >= | 8.202600958 | Sodium.resultn     | <  | 140.5       |                |         | 0.003183304  | 2077         |      |
| psc.yrs.dur    | >= | 8.202600958 | Sodium.resultn     | >= | 140.5       |                |         | -0.000506566 | 2077         |      |
| psc.yrs.dur    | =  | Missing     |                    |    |             |                |         | 0.000132779  | 2078         |      |
| psc.yrs.dur    | <  | 6.324435318 | ALB.resultn        | =  | Missing     |                |         | 0            | 2078         |      |
| psc.yrs.dur    | <  | 6.324435318 | ALB.resultn        | <  | 3.135       |                |         | -0.000288152 | 2078         |      |
| psc.yrs.dur    | <  | 6.324435318 | ALB.resultn        | >= | 3.135       |                |         | 0.00012566   | 2078         |      |
| psc.yrs.dur    | >= | 6.324435318 | AST.resultn        | =  | Missing     |                |         | 0.000476312  | 2078         |      |
| psc.yrs.dur    | >= | 6.324435318 | AST.resultn        | <  | 62.5        |                |         | -0.000143675 | 2078         |      |
| psc.yrs.dur    | >= | 6.324435318 | AST.resultn        | >= | 62.5        |                |         | 0.001964282  | 2078         |      |
| psc.yrs.dur    | =  | Missing     |                    |    |             | Missing        |         | -0.002967549 | 2079         |      |
| psc.yrs.dur    | <  | 6.410677618 |                    |    |             | Missing        |         | -0.003264936 | 2079         |      |
| psc.yrs.dur    | >= | 6.410677618 | psc.yrs.dur        | =  | Missing     | Missing        |         | -0.001508274 | 2079         |      |
| psc.yrs.dur    | >= | 6.410677618 | psc.yrs.dur        | <  | 9.863107461 | Missing        |         | -0.000731166 | 2079         |      |
| psc.yrs.dur    | >= | 6.410677618 | psc.yrs.dur        | >= | 9.863107461 | psc.yrs.dur    | =       | Missing      | -0.002123484 | 2079 |
| psc.yrs.dur    | >= | 6.410677618 | psc.yrs.dur        | >= | 9.863107461 | psc.yrs.dur    | <       | 13.78644764  | -0.003640259 | 2079 |
| psc.yrs.dur    | >= | 6.410677618 | psc.yrs.dur        | >= | 9.863107461 | psc.yrs.dur    | >=      | 13.78644764  | 0            | 2079 |
| Sodium.resultn | =  | Missing     |                    |    |             | Missing        |         | -0.001994261 | 2080         |      |
| Sodium.resultn | <  | 143.5       | PLT.resultn        | =  | Missing     | Missing        |         | -0.001731541 | 2080         |      |
| Sodium.resultn | <  | 143.5       | PLT.resultn        | <  | 249.5       | AST.resultn    | =       | Missing      | -0.001071025 | 2080 |
| Sodium.resultn | <  | 143.5       | PLT.resultn        | <  | 249.5       | AST.resultn    | <       | 53.5         | -0.002722189 | 2080 |
| Sodium.resultn | <  | 143.5       | PLT.resultn        | <  | 249.5       | AST.resultn    | >=      | 53.5         | 0            | 2080 |
| Sodium.resultn | <  | 143.5       | PLT.resultn        | >= | 249.5       |                | Missing |              | -0.002211201 | 2080 |
| Sodium.resultn | >= | 143.5       |                    |    |             | Missing        |         | -0.002426834 | 2080         |      |
| age.yrs        | =  | Missing     |                    |    |             |                |         | 0.000969882  | 2081         |      |
| age.yrs        | <  | 62.51608487 | ALB.resultn        | =  | Missing     |                |         | 0            | 2081         |      |
| age.yrs        | <  | 62.51608487 | ALB.resultn        | <  | 3.135       |                |         | 0.000645086  | 2081         |      |
| age.yrs        | <  | 62.51608487 | ALB.resultn        | >= | 3.135       |                |         | 0.00101756   | 2081         |      |
| age.yrs        | >= | 62.51608487 | AST.resultn        | =  | Missing     |                |         | 0.001620321  | 2081         |      |
| age.yrs        | >= | 62.51608487 | AST.resultn        | <  | 51          |                |         | 1.18E-06     | 2081         |      |
| age.yrs        | >= | 62.51608487 | AST.resultn        | >= | 51          |                |         | 0.003347405  | 2081         |      |
| ALK.times.uln  | =  | Missing     | TBILL.resultn      | =  | Missing     |                |         | -0.000335328 | 2082         |      |
| ALK.times.uln  | =  | Missing     | TBILL.resultn      | <  | 1.15        |                |         | -0.001167706 | 2082         |      |

|                |    |             |                |    |             |               |    |              |              |      |
|----------------|----|-------------|----------------|----|-------------|---------------|----|--------------|--------------|------|
| ALK.times.uln  | =  | Missing     | TBILI.resultn  | >= | 1.15        |               |    | 0.001717872  | 2082         |      |
| ALK.times.uln  | <  | 6.02        | ALB.resultn    | =  | Missing     |               |    | -0.000617787 | 2082         |      |
| ALK.times.uln  | <  | 6.02        | ALB.resultn    | <  | 4.15        |               |    | -0.001235575 | 2082         |      |
| ALK.times.uln  | <  | 6.02        | ALB.resultn    | >= | 4.15        |               |    | 0            | 2082         |      |
| ALK.times.uln  | >= | 6.02        |                |    |             |               |    | 0.000939483  | 2082         |      |
| TBILI.resultn  | =  | Missing     |                |    |             | Missing       |    | -0.001229361 | 2083         |      |
| TBILI.resultn  | <  | 1.55        |                |    |             | Missing       |    | -0.001333683 | 2083         |      |
| TBILI.resultn  | >= | 1.55        | psc.yrs.dur    | =  | Missing     | Missing       |    | -0.000736863 | 2083         |      |
| TBILI.resultn  | >= | 1.55        | psc.yrs.dur    | <  | 0.476386037 | Missing       |    | -0.001681473 | 2083         |      |
| TBILI.resultn  | >= | 1.55        | psc.yrs.dur    | >= | 0.476386037 | PLT.resultn   | =  | Missing      | 0.000252727  | 2083 |
| TBILI.resultn  | >= | 1.55        | psc.yrs.dur    | >= | 0.476386037 | PLT.resultn   | <  | 235          | 0.000505455  | 2083 |
| TBILI.resultn  | >= | 1.55        | psc.yrs.dur    | >= | 0.476386037 | PLT.resultn   | >= | 235          | 0            | 2083 |
| ALK.times.uln  | =  | Missing     |                |    |             | Missing       |    | -0.000683075 | 2084         |      |
| ALK.times.uln  | <  | 2.81254114  |                |    |             | Missing       |    | -0.000578436 | 2084         |      |
| ALK.times.uln  | >= | 2.81254114  | Sodium.resultn | =  | Missing     | Missing       |    | -9.03E-05    | 2084         |      |
| ALK.times.uln  | >= | 2.81254114  | Sodium.resultn | <  | 138.5       | AST.resultn   | =  | Missing      | 0.001981618  | 2084 |
| ALK.times.uln  | >= | 2.81254114  | Sodium.resultn | <  | 138.5       | AST.resultn   | <  | 93           | 0.003963237  | 2084 |
| ALK.times.uln  | >= | 2.81254114  | Sodium.resultn | <  | 138.5       | AST.resultn   | >= | 93           | 0            | 2084 |
| ALK.times.uln  | >= | 2.81254114  | Sodium.resultn | >= | 138.5       |               |    | Missing      | -0.000471557 | 2084 |
| ALB.resultn    | =  | Missing     |                |    |             | Missing       |    | -0.000823341 | 2085         |      |
| ALB.resultn    | <  | 3.615       | PLT.resultn    | =  | Missing     | Missing       |    | -0.000868509 | 2085         |      |
| ALB.resultn    | <  | 3.615       | PLT.resultn    | <  | 218         |               |    | Missing      | 0.001272194  | 2085 |
| ALB.resultn    | <  | 3.615       | PLT.resultn    | >= | 218         | ALK.times.uln | =  | Missing      | -0.001447078 | 2085 |
| ALB.resultn    | <  | 3.615       | PLT.resultn    | >= | 218         | ALK.times.uln | <  | 4.456632653  | -0.002170617 | 2085 |
| ALB.resultn    | <  | 3.615       | PLT.resultn    | >= | 218         | ALK.times.uln | >= | 4.456632653  | 0            | 2085 |
| ALB.resultn    | >= | 3.615       |                |    |             | Missing       |    | -0.001619007 | 2085         |      |
| ALB.resultn    | =  | Missing     |                |    |             | Missing       |    | -0.000979794 | 2086         |      |
| ALB.resultn    | <  | 2.825       |                |    |             | Missing       |    | -0.000642946 | 2086         |      |
| ALB.resultn    | >= | 2.825       | ALK.times.uln  | =  | Missing     | TBILI.resultn | =  | Missing      | -0.001358611 | 2086 |
| ALB.resultn    | >= | 2.825       | ALK.times.uln  | =  | Missing     | TBILI.resultn | <  | 1.55         | -0.001716141 | 2086 |
| ALB.resultn    | >= | 2.825       | ALK.times.uln  | =  | Missing     | TBILI.resultn | >= | 1.55         | 0            | 2086 |
| ALB.resultn    | >= | 2.825       | ALK.times.uln  | <  | 6.066948357 |               |    | Missing      | -0.001661132 | 2086 |
| ALB.resultn    | >= | 2.825       | ALK.times.uln  | >= | 6.066948357 |               |    | Missing      | -0.002104244 | 2086 |
| TBILI.resultn  | =  | Missing     |                |    |             | Missing       |    | Missing      | 1.42E-05     | 2087 |
| TBILI.resultn  | <  | 2.6         | ALK.times.uln  | =  | Missing     | ALB.resultn   | =  | Missing      | 0.000929668  | 2087 |
| TBILI.resultn  | <  | 2.6         | ALK.times.uln  | =  | Missing     | ALB.resultn   | <  | 3.95         | 0.002201844  | 2087 |
| TBILI.resultn  | <  | 2.6         | ALK.times.uln  | =  | Missing     | ALB.resultn   | >= | 3.95         | 0            | 2087 |
| TBILI.resultn  | <  | 2.6         | ALK.times.uln  | <  | 6.012755102 |               |    | Missing      | 0.000727171  | 2087 |
| TBILI.resultn  | <  | 2.6         | ALK.times.uln  | >= | 6.012755102 |               |    | Missing      | 0.003413929  | 2087 |
| TBILI.resultn  | >= | 2.6         |                |    |             | Missing       |    | Missing      | 0.000589839  | 2087 |
| AST.resultn    | =  | Missing     |                |    |             | Missing       |    | Missing      | -0.001625261 | 2088 |
| AST.resultn    | <  | 150         | AST.resultn    | =  | Missing     |               |    | Missing      | -0.000847997 | 2088 |
| AST.resultn    | <  | 150         | AST.resultn    | <  | 43          |               |    | Missing      | -0.001621434 | 2088 |
| AST.resultn    | <  | 150         | AST.resultn    | >= | 43          | TBILI.resultn | =  | Missing      | -0.000336339 | 2088 |
| AST.resultn    | <  | 150         | AST.resultn    | >= | 43          | TBILI.resultn | <  | 0.65         | -0.001086632 | 2088 |
| AST.resultn    | <  | 150         | AST.resultn    | >= | 43          | TBILI.resultn | >= | 0.65         | 0            | 2088 |
| AST.resultn    | >= | 150         |                |    |             | Missing       |    | Missing      | -0.001176697 | 2088 |
| ALK.times.uln  | =  | Missing     |                |    |             | Missing       |    | Missing      | 0.000115754  | 2089 |
| ALK.times.uln  | <  | 2.893313702 |                |    |             | Missing       |    | Missing      | -4.12E-05    | 2089 |
| ALK.times.uln  | >= | 2.893313702 | psc.yrs.dur    | =  | Missing     |               |    | Missing      | 0.000885706  | 2089 |
| ALK.times.uln  | >= | 2.893313702 | psc.yrs.dur    | <  | 2.135523614 | psc.yrs.dur   | =  | Missing      | 0.000539122  | 2089 |
| ALK.times.uln  | >= | 2.893313702 | psc.yrs.dur    | <  | 2.135523614 | psc.yrs.dur   | <  | 0.045174538  | 0.002210401  | 2089 |
| ALK.times.uln  | >= | 2.893313702 | psc.yrs.dur    | <  | 2.135523614 | psc.yrs.dur   | >= | 0.045174538  | 0            | 2089 |
| ALK.times.uln  | >= | 2.893313702 | psc.yrs.dur    | >= | 2.135523614 |               |    | Missing      | 0.0019007    | 2089 |
| psc.yrs.dur    | =  | Missing     |                |    |             | Missing       |    | Missing      | -0.000834277 | 2090 |
| psc.yrs.dur    | <  | 6.379192334 |                |    |             | Missing       |    | Missing      | -0.000967377 | 2090 |
| psc.yrs.dur    | >= | 6.379192334 | AST.resultn    | =  | Missing     |               |    | Missing      | 8.91E-05     | 2090 |
| psc.yrs.dur    | >= | 6.379192334 | AST.resultn    | <  | 43          |               |    | Missing      | -0.001597149 | 2090 |
| psc.yrs.dur    | >= | 6.379192334 | AST.resultn    | >= | 43          | psc.yrs.dur   | =  | Missing      | 0.001016537  | 2090 |
| psc.yrs.dur    | >= | 6.379192334 | AST.resultn    | >= | 43          | psc.yrs.dur   | <  | 9.863107461  | 0.002033074  | 2090 |
| psc.yrs.dur    | >= | 6.379192334 | AST.resultn    | >= | 43          | psc.yrs.dur   | >= | 9.863107461  | 0            | 2090 |
| Sodium.resultn | =  | Missing     |                |    |             | Missing       |    | Missing      | -0.001547891 | 2091 |

|                |    |             |                    |    |             |               |    |             |              |      |
|----------------|----|-------------|--------------------|----|-------------|---------------|----|-------------|--------------|------|
| Sodium.resultn | <  | 143.5       | ALK.times.uln      | =  | Missing     | TBILL.resultn | =  | Missing     | -0.001377279 | 2091 |
| Sodium.resultn | <  | 143.5       | ALK.times.uln      | =  | Missing     | TBILL.resultn | <  | 0.95        | -0.002038374 | 2091 |
| Sodium.resultn | <  | 143.5       | ALK.times.uln      | =  | Missing     | TBILL.resultn | >= | 0.95        | 0            | 2091 |
| Sodium.resultn | <  | 143.5       | ALK.times.uln      | <  | 5.406407841 |               |    | Missing     | -0.001076239 | 2091 |
| Sodium.resultn | <  | 143.5       | ALK.times.uln      | >= | 5.406407841 |               |    | Missing     | -0.00022507  | 2091 |
| Sodium.resultn | >= | 143.5       |                    |    |             |               |    | Missing     | -0.001669255 | 2091 |
| TBILL.resultn  | =  | Missing     |                    |    |             |               |    |             | 0.000926153  | 2092 |
| TBILL.resultn  | <  | 1.65        | ALK.times.uln      | =  | Missing     |               |    |             | 0            | 2092 |
| TBILL.resultn  | <  | 1.65        | ALK.times.uln      | <  | 5.963877551 |               |    |             | -0.000595532 | 2092 |
| TBILL.resultn  | <  | 1.65        | ALK.times.uln      | >= | 5.963877551 |               |    |             | 0.001306762  | 2092 |
| TBILL.resultn  | >= | 1.65        | Hemoglobin.resultn | =  | Missing     |               |    |             | 0.001135737  | 2092 |
| TBILL.resultn  | >= | 1.65        | Hemoglobin.resultn | <  | 12.95       |               |    |             | 0.003529507  | 2092 |
| TBILL.resultn  | >= | 1.65        | Hemoglobin.resultn | >= | 12.95       |               |    |             | -0.000574099 | 2092 |
| ALB.resultn    | =  | Missing     |                    |    |             |               |    | Missing     | -0.000271061 | 2093 |
| ALB.resultn    | <  | 2.95        |                    |    |             |               |    | Missing     | 0.001228651  | 2093 |
| ALB.resultn    | >= | 2.95        | ALB.resultn        | =  | Missing     |               |    | Missing     | -0.000352389 | 2093 |
| ALB.resultn    | >= | 2.95        | ALB.resultn        | <  | 3.15        |               |    | Missing     | -0.000543347 | 2093 |
| ALB.resultn    | >= | 2.95        | ALB.resultn        | >= | 3.15        | ALK.times.uln | =  | Missing     | 0            | 2093 |
| ALB.resultn    | >= | 2.95        | ALB.resultn        | >= | 3.15        | ALK.times.uln | <  | 6.02        | -0.000595021 | 2093 |
| ALB.resultn    | >= | 2.95        | ALB.resultn        | >= | 3.15        | ALK.times.uln | >= | 6.02        | 0.001341985  | 2093 |
| psc.yrs.dur    | =  | Missing     |                    |    |             |               |    | Missing     | 0.0002807    | 2094 |
| psc.yrs.dur    | <  | 2.05065024  |                    |    |             |               |    | Missing     | 8.21E-05     | 2094 |
| psc.yrs.dur    | >= | 2.05065024  | AST.resultn        | =  | Missing     |               |    | Missing     | 0.000802774  | 2094 |
| psc.yrs.dur    | >= | 2.05065024  | AST.resultn        | <  | 111.5       | psc.yrs.dur   | =  | Missing     | 0.000439612  | 2094 |
| psc.yrs.dur    | >= | 2.05065024  | AST.resultn        | <  | 111.5       | psc.yrs.dur   | <  | 2.911704312 | 0.00219806   | 2094 |
| psc.yrs.dur    | >= | 2.05065024  | AST.resultn        | <  | 111.5       | psc.yrs.dur   | >= | 2.911704312 | 0            | 2094 |
| psc.yrs.dur    | >= | 2.05065024  | AST.resultn        | >= | 111.5       |               |    | Missing     | 0.002134368  | 2094 |
| age.yrs        | =  | Missing     |                    |    |             |               |    | Missing     | -0.000125567 | 2095 |
| age.yrs        | <  | 53.46475017 |                    |    |             |               |    | Missing     | -0.000370316 | 2095 |
| age.yrs        | >= | 53.46475017 | AST.resultn        | =  | Missing     |               |    | Missing     | 0.000447662  | 2095 |
| age.yrs        | >= | 53.46475017 | AST.resultn        | <  | 51.5        |               |    | Missing     | -0.000882338 | 2095 |
| age.yrs        | >= | 53.46475017 | AST.resultn        | >= | 51.5        | PLT.resultn   | =  | Missing     | 0.001741716  | 2095 |
| age.yrs        | >= | 53.46475017 | AST.resultn        | >= | 51.5        | PLT.resultn   | <  | 251.5       | 0.002933416  | 2095 |
| age.yrs        | >= | 53.46475017 | AST.resultn        | >= | 51.5        | PLT.resultn   | >= | 251.5       | 0            | 2095 |
| ALK.times.uln  | =  | Missing     |                    |    |             |               |    |             | -0.000904791 | 2096 |
| ALK.times.uln  | <  | 5.462893197 | TBILL.resultn      | =  | Missing     |               |    |             | -0.001096524 | 2096 |
| ALK.times.uln  | <  | 5.462893197 | TBILL.resultn      | <  | 2.45        |               |    |             | -0.001165488 | 2096 |
| ALK.times.uln  | <  | 5.462893197 | TBILL.resultn      | >= | 2.45        |               |    |             | 0            | 2096 |
| ALK.times.uln  | >= | 5.462893197 | TBILL.resultn      | =  | Missing     |               |    |             | -0.000122138 | 2096 |
| ALK.times.uln  | >= | 5.462893197 | TBILL.resultn      | <  | 1.5         |               |    |             | -0.000225883 | 2096 |
| ALK.times.uln  | >= | 5.462893197 | TBILL.resultn      | >= | 1.5         |               |    |             | -1.84E-05    | 2096 |
| ALB.resultn    | =  | Missing     |                    |    |             |               |    | Missing     | -0.001996443 | 2097 |
| ALB.resultn    | <  | 2.915       |                    |    |             |               |    | Missing     | -0.000596347 | 2097 |
| ALB.resultn    | >= | 2.915       | Hemoglobin.resultn | =  | Missing     | psc.yrs.dur   | =  | Missing     | -0.001533819 | 2097 |
| ALB.resultn    | >= | 2.915       | Hemoglobin.resultn | =  | Missing     | psc.yrs.dur   | <  | 4.895277207 | -0.00197782  | 2097 |
| ALB.resultn    | >= | 2.915       | Hemoglobin.resultn | =  | Missing     | psc.yrs.dur   | >= | 4.895277207 | 0            | 2097 |
| ALB.resultn    | >= | 2.915       | Hemoglobin.resultn | <  | 13.65       |               |    | Missing     | -0.002199944 | 2097 |
| ALB.resultn    | >= | 2.915       | Hemoglobin.resultn | >= | 13.65       |               |    | Missing     | -0.002973417 | 2097 |
| ALB.resultn    | =  | Missing     |                    |    |             |               |    | Missing     | 0.000625462  | 2098 |
| ALB.resultn    | <  | 3.135       |                    |    |             |               |    | Missing     | -0.000301184 | 2098 |
| ALB.resultn    | >= | 3.135       | TBILL.resultn      | =  | Missing     |               |    | Missing     | 0.000179072  | 2098 |
| ALB.resultn    | >= | 3.135       | TBILL.resultn      | <  | 1.65        |               |    | Missing     | 8.44E-05     | 2098 |
| ALB.resultn    | >= | 3.135       | TBILL.resultn      | >= | 1.65        | PLT.resultn   | =  | Missing     | 0.001009519  | 2098 |
| ALB.resultn    | >= | 3.135       | TBILL.resultn      | >= | 1.65        | PLT.resultn   | <  | 227.5       | 0.002220942  | 2098 |
| ALB.resultn    | >= | 3.135       | TBILL.resultn      | >= | 1.65        | PLT.resultn   | >= | 227.5       | 0            | 2098 |
| ALB.resultn    | =  | Missing     |                    |    |             |               |    | Missing     | -0.002215102 | 2099 |
| ALB.resultn    | <  | 2.95        |                    |    |             |               |    | Missing     | -0.000247526 | 2099 |
| ALB.resultn    | >= | 2.95        | PLT.resultn        | =  | Missing     |               |    | Missing     | -0.002244454 | 2099 |
| ALB.resultn    | >= | 2.95        | PLT.resultn        | <  | 249.5       | ALK.times.uln | =  | Missing     | 0            | 2099 |
| ALB.resultn    | >= | 2.95        | PLT.resultn        | <  | 249.5       | ALK.times.uln | <  | 3.458288585 | -0.001766365 | 2099 |
| ALB.resultn    | >= | 2.95        | PLT.resultn        | <  | 249.5       | ALK.times.uln | >= | 3.458288585 | 0.000303398  | 2099 |
| ALB.resultn    | >= | 2.95        | PLT.resultn        | >= | 249.5       |               |    | Missing     | -0.001932608 | 2099 |

|                |    |             |               |    |             |               |              |              |              |      |
|----------------|----|-------------|---------------|----|-------------|---------------|--------------|--------------|--------------|------|
| PLT.resultn    | =  | Missing     |               |    |             | Missing       | -0.001811982 | 2100         |              |      |
| PLT.resultn    | <  | 185.5       |               |    |             | Missing       | 0.000941605  | 2100         |              |      |
| PLT.resultn    | >= | 185.5       | TBILL.resultn | =  | Missing     | Missing       | 0.002272049  | 2100         |              |      |
| PLT.resultn    | >= | 185.5       | TBILL.resultn | <  | 3.05        | TBILL.resultn | =            | Missing      | -0.001193077 | 2100 |
| PLT.resultn    | >= | 185.5       | TBILL.resultn | <  | 3.05        | TBILL.resultn | <            | 1.95         | -0.001256203 | 2100 |
| PLT.resultn    | >= | 185.5       | TBILL.resultn | <  | 3.05        | TBILL.resultn | >=           | 1.95         | 0            | 2100 |
| PLT.resultn    | >= | 185.5       | TBILL.resultn | >= | 3.05        |               | Missing      | -0.001383319 | 2100         |      |
| ALK.times.uln  | =  | Missing     |               |    |             | Missing       | -0.001377196 | 2101         |              |      |
| ALK.times.uln  | <  | 8.257538256 | TBILL.resultn | =  | Missing     | Missing       | -0.001150106 | 2101         |              |      |
| ALK.times.uln  | <  | 8.257538256 | TBILL.resultn | <  | 0.85        |               | Missing      | -0.001230257 | 2101         |      |
| ALK.times.uln  | <  | 8.257538256 | TBILL.resultn | >= | 0.85        | ALK.times.uln | =            | Missing      | -0.001054926 | 2101 |
| ALK.times.uln  | <  | 8.257538256 | TBILL.resultn | >= | 0.85        | ALK.times.uln | <            | 2.795652174  | -0.002109853 | 2101 |
| ALK.times.uln  | <  | 8.257538256 | TBILL.resultn | >= | 0.85        | ALK.times.uln | >=           | 2.795652174  | 0            | 2101 |
| ALK.times.uln  | >= | 8.257538256 |               |    |             |               | Missing      | -0.001712167 | 2101         |      |
| PLT.resultn    | =  | Missing     |               |    |             |               | -0.000703025 | 2102         |              |      |
| PLT.resultn    | <  | 197.5       | TBILL.resultn | =  | Missing     |               | -1.85E-05    | 2102         |              |      |
| PLT.resultn    | <  | 197.5       | TBILL.resultn | <  | 1.35        |               | -0.000698833 | 2102         |              |      |
| PLT.resultn    | <  | 197.5       | TBILL.resultn | >= | 1.35        |               | 0.001342054  | 2102         |              |      |
| PLT.resultn    | >= | 197.5       | ALK.times.uln | =  | Missing     |               | 0            | 2102         |              |      |
| PLT.resultn    | >= | 197.5       | ALK.times.uln | <  | 6.068687487 |               | -0.000826263 | 2102         |              |      |
| PLT.resultn    | >= | 197.5       | ALK.times.uln | >= | 6.068687487 |               | -0.000949322 | 2102         |              |      |
| ALK.times.uln  | =  | Missing     | TBILL.resultn | =  | Missing     |               | 0            | 2103         |              |      |
| ALK.times.uln  | =  | Missing     | TBILL.resultn | <  | 0.95        |               | -8.21E-05    | 2103         |              |      |
| ALK.times.uln  | =  | Missing     | TBILL.resultn | >= | 0.95        |               | 0.001848886  | 2103         |              |      |
| ALK.times.uln  | <  | 7.81347848  | TBILL.resultn | =  | Missing     |               | 0.000968025  | 2103         |              |      |
| ALK.times.uln  | <  | 7.81347848  | TBILL.resultn | <  | 2.45        |               | 0.000840107  | 2103         |              |      |
| ALK.times.uln  | <  | 7.81347848  | TBILL.resultn | >= | 2.45        |               | 0.002898426  | 2103         |              |      |
| ALK.times.uln  | >= | 7.81347848  |               |    |             |               | 0.000514259  | 2103         |              |      |
| Sodium.resultn | =  | Missing     | TBILL.resultn | =  | Missing     |               | 0            | 2104         |              |      |
| Sodium.resultn | =  | Missing     | TBILL.resultn | <  | 1.31        |               | -0.002431899 | 2104         |              |      |
| Sodium.resultn | =  | Missing     | TBILL.resultn | >= | 1.31        |               | -0.000904584 | 2104         |              |      |
| Sodium.resultn | <  | 136.5       |               |    |             |               | -1.68E-05    | 2104         |              |      |
| Sodium.resultn | >= | 136.5       | TBILL.resultn | =  | Missing     |               | -0.001544418 | 2104         |              |      |
| Sodium.resultn | >= | 136.5       | TBILL.resultn | <  | 2.55        |               | -0.001505936 | 2104         |              |      |
| Sodium.resultn | >= | 136.5       | TBILL.resultn | >= | 2.55        |               | -0.001840252 | 2104         |              |      |
| TBILL.resultn  | =  | Missing     |               |    |             | Missing       | -0.00168563  | 2105         |              |      |
| TBILL.resultn  | <  | 0.75        |               |    |             | Missing       | -0.002340939 | 2105         |              |      |
| TBILL.resultn  | >= | 0.75        | ALK.times.uln | =  | Missing     |               | -0.000567555 | 2105         |              |      |
| TBILL.resultn  | >= | 0.75        | ALK.times.uln | <  | 6.066948357 | psc.yrs.dur   | =            | Missing      | -0.000896916 | 2105 |
| TBILL.resultn  | >= | 0.75        | ALK.times.uln | <  | 6.066948357 | psc.yrs.dur   | <            | 2.05065024   | -0.001323319 | 2105 |
| TBILL.resultn  | >= | 0.75        | ALK.times.uln | <  | 6.066948357 | psc.yrs.dur   | >=           | 2.05065024   | 0            | 2105 |
| TBILL.resultn  | >= | 0.75        | ALK.times.uln | >= | 6.066948357 |               | Missing      | -0.002343087 | 2105         |      |
| psc.yrs.dur    | =  | Missing     |               |    |             | Missing       | -8.54E-05    | 2106         |              |      |
| psc.yrs.dur    | <  | 13.02121834 | TBILL.resultn | =  | Missing     |               | 0.002194125  | 2106         |              |      |
| psc.yrs.dur    | <  | 13.02121834 | TBILL.resultn | <  | 4.65        | ALK.times.uln | =            | Missing      | 0            | 2106 |
| psc.yrs.dur    | <  | 13.02121834 | TBILL.resultn | <  | 4.65        | ALK.times.uln | <            | 2.822501299  | -0.000753528 | 2106 |
| psc.yrs.dur    | <  | 13.02121834 | TBILL.resultn | <  | 4.65        | ALK.times.uln | >=           | 2.822501299  | 0.000674904  | 2106 |
| psc.yrs.dur    | <  | 13.02121834 | TBILL.resultn | >= | 4.65        |               | Missing      | -0.000187581 | 2106         |      |
| psc.yrs.dur    | >= | 13.02121834 |               |    |             |               | Missing      | 0.002089418  | 2106         |      |
| TBILL.resultn  | =  | Missing     |               |    |             |               | Missing      | -0.000333135 | 2107         |      |
| TBILL.resultn  | <  | 2.75        | ALK.times.uln | =  | Missing     |               | Missing      | -0.000155348 | 2107         |      |
| TBILL.resultn  | <  | 2.75        | ALK.times.uln | <  | 2.815208295 |               | Missing      | -0.000638705 | 2107         |      |
| TBILL.resultn  | <  | 2.75        | ALK.times.uln | >= | 2.815208295 | age.yrs       | =            | Missing      | 0.000956633  | 2107 |
| TBILL.resultn  | <  | 2.75        | ALK.times.uln | >= | 2.815208295 | age.yrs       | <            | 33.42778919  | 0.003635206  | 2107 |
| TBILL.resultn  | <  | 2.75        | ALK.times.uln | >= | 2.815208295 | age.yrs       | >=           | 33.42778919  | 0            | 2107 |
| TBILL.resultn  | >= | 2.75        |               |    |             |               | Missing      | -0.000768262 | 2107         |      |
| PLT.resultn    | =  | Missing     |               |    |             |               | Missing      | -0.00092823  | 2108         |      |
| PLT.resultn    | <  | 194.5       |               |    |             |               | Missing      | 0.000872208  | 2108         |      |
| PLT.resultn    | >= | 194.5       | TBILL.resultn | =  | Missing     |               | Missing      | 0.001565267  | 2108         |      |
| PLT.resultn    | >= | 194.5       | TBILL.resultn | <  | 2.85        | ALK.times.uln | =            | Missing      | 0            | 2108 |
| PLT.resultn    | >= | 194.5       | TBILL.resultn | <  | 2.85        | ALK.times.uln | <            | 5.406407841  | -0.000974255 | 2108 |
| PLT.resultn    | >= | 194.5       | TBILL.resultn | <  | 2.85        | ALK.times.uln | >=           | 5.406407841  | 0.000774227  | 2108 |

|                |    |             |                |    |             |               |              |              |              |      |
|----------------|----|-------------|----------------|----|-------------|---------------|--------------|--------------|--------------|------|
| PLT.resultn    | >= | 194.5       | TBILI.resultn  | >= | 2.85        | Missing       | -0.000968126 | 2108         |              |      |
| PLT.resultn    | =  | Missing     |                |    |             | Missing       | -4.69E-05    | 2109         |              |      |
| PLT.resultn    | <  | 171.5       |                |    |             | Missing       | 0.001817695  | 2109         |              |      |
| PLT.resultn    | >= | 171.5       | AST.resultn    | =  | Missing     | Missing       | -0.000316611 | 2109         |              |      |
| PLT.resultn    | >= | 171.5       | AST.resultn    | <  | 144.5       | ALK.times.uln | =            | Missing      | 0            | 2109 |
| PLT.resultn    | >= | 171.5       | AST.resultn    | <  | 144.5       | ALK.times.uln | <            | 2.822501299  | -0.000873464 | 2109 |
| PLT.resultn    | >= | 171.5       | AST.resultn    | <  | 144.5       | ALK.times.uln | >=           | 2.822501299  | 0.001257057  | 2109 |
| PLT.resultn    | >= | 171.5       | AST.resultn    | >= | 144.5       |               | Missing      | -0.000712666 | 2109         |      |
| PLT.resultn    | =  | Missing     |                |    |             | Missing       | -0.002683635 | 2110         |              |      |
| PLT.resultn    | <  | 172.5       |                |    |             | Missing       | -0.001124945 | 2110         |              |      |
| PLT.resultn    | >= | 172.5       | psc.yrs.dur    | =  | Missing     | Missing       | -0.002390197 | 2110         |              |      |
| PLT.resultn    | >= | 172.5       | psc.yrs.dur    | <  | 0.042436687 | ALK.times.uln | =            | Missing      | -0.001367388 | 2110 |
| PLT.resultn    | >= | 172.5       | psc.yrs.dur    | <  | 0.042436687 | ALK.times.uln | <            | 3.748495558  | -0.002087066 | 2110 |
| PLT.resultn    | >= | 172.5       | psc.yrs.dur    | <  | 0.042436687 | ALK.times.uln | >=           | 3.748495558  | 0            | 2110 |
| PLT.resultn    | >= | 172.5       | psc.yrs.dur    | >= | 0.042436687 |               | Missing      | -0.002583395 | 2110         |      |
| psc.yrs.dur    | =  | Missing     |                |    |             |               | -0.000454565 | 2111         |              |      |
| psc.yrs.dur    | <  | 1.385352498 | TBILI.resultn  | =  | Missing     |               | 0            | 2111         |              |      |
| psc.yrs.dur    | <  | 1.385352498 | TBILI.resultn  | <  | 2.2         |               | -0.000789615 | 2111         |              |      |
| psc.yrs.dur    | <  | 1.385352498 | TBILI.resultn  | >= | 2.2         |               | -0.001131678 | 2111         |              |      |
| psc.yrs.dur    | >= | 1.385352498 | Sodium.resultn | =  | Missing     |               | -0.000131756 | 2111         |              |      |
| psc.yrs.dur    | >= | 1.385352498 | Sodium.resultn | <  | 138.5       |               | 0.001100005  | 2111         |              |      |
| psc.yrs.dur    | >= | 1.385352498 | Sodium.resultn | >= | 138.5       |               | -0.000117706 | 2111         |              |      |
| age.yrs        | =  | Missing     |                |    |             | Missing       | 0.001016081  | 2112         |              |      |
| age.yrs        | <  | 69.76043806 | TBILI.resultn  | =  | Missing     | Missing       | 0.00093928   | 2112         |              |      |
| age.yrs        | <  | 69.76043806 | TBILI.resultn  | <  | 3.75        | ALB.resultn   | =            | Missing      | 0            | 2112 |
| age.yrs        | <  | 69.76043806 | TBILI.resultn  | <  | 3.75        | ALB.resultn   | <            | 4.255        | 0.000360691  | 2112 |
| age.yrs        | <  | 69.76043806 | TBILI.resultn  | <  | 3.75        | ALB.resultn   | >=           | 4.255        | 0.001795156  | 2112 |
| age.yrs        | <  | 69.76043806 | TBILI.resultn  | >= | 3.75        |               | Missing      | 0.001839399  | 2112         |      |
| age.yrs        | >= | 69.76043806 |                |    |             | Missing       | 0.002712676  | 2112         |              |      |
| ALK.times.uln  | =  | Missing     | psc.yrs.dur    | =  | Missing     | Missing       | 0.000655179  | 2113         |              |      |
| ALK.times.uln  | =  | Missing     | psc.yrs.dur    | <  | 0.396988364 |               | Missing      | 0.000273413  | 2113         |      |
| ALK.times.uln  | =  | Missing     | psc.yrs.dur    | >= | 0.396988364 | ALB.resultn   | =            | Missing      | 0            | 2113 |
| ALK.times.uln  | =  | Missing     | psc.yrs.dur    | >= | 0.396988364 | ALB.resultn   | <            | 3.95         | 0.002779159  | 2113 |
| ALK.times.uln  | =  | Missing     | psc.yrs.dur    | >= | 0.396988364 | ALB.resultn   | >=           | 3.95         | 8.35E-05     | 2113 |
| ALK.times.uln  | <  | 6.115825908 |                |    |             | Missing       | 0.000608428  | 2113         |              |      |
| ALK.times.uln  | >= | 6.115825908 |                |    |             | Missing       | 0.001931483  | 2113         |              |      |
| Sodium.resultn | =  | Missing     |                |    |             |               | -0.000272246 | 2114         |              |      |
| Sodium.resultn | <  | 138.5       | age.yrs        | =  | Missing     |               | 0.001034053  | 2114         |              |      |
| Sodium.resultn | <  | 138.5       | age.yrs        | <  | 54.3504449  |               | 0.000628513  | 2114         |              |      |
| Sodium.resultn | <  | 138.5       | age.yrs        | >= | 54.3504449  |               | 0.00240665   | 2114         |              |      |
| Sodium.resultn | >= | 138.5       | psc.yrs.dur    | =  | Missing     |               | 0.00033719   | 2114         |              |      |
| Sodium.resultn | >= | 138.5       | psc.yrs.dur    | <  | 0.001368925 |               | 0.003090908  | 2114         |              |      |
| Sodium.resultn | >= | 138.5       | psc.yrs.dur    | >= | 0.001368925 |               | 0            | 2114         |              |      |
| age.yrs        | =  | Missing     |                |    |             | Missing       | -0.002378263 | 2115         |              |      |
| age.yrs        | <  | 51.63175907 |                |    |             | Missing       | -0.00277872  | 2115         |              |      |
| age.yrs        | >= | 51.63175907 | TBILI.resultn  | =  | Missing     | Missing       | -0.001404179 | 2115         |              |      |
| age.yrs        | >= | 51.63175907 | TBILI.resultn  | <  | 1.65        | ALB.resultn   | =            | Missing      | -0.001606912 | 2115 |
| age.yrs        | >= | 51.63175907 | TBILI.resultn  | <  | 1.65        | ALB.resultn   | <            | 4.45         | -0.002142549 | 2115 |
| age.yrs        | >= | 51.63175907 | TBILI.resultn  | <  | 1.65        | ALB.resultn   | >=           | 4.45         | 0            | 2115 |
| age.yrs        | >= | 51.63175907 | TBILI.resultn  | >= | 1.65        |               | Missing      | -0.000484082 | 2115         |      |
| AST.resultn    | =  | Missing     |                |    |             | Missing       | -0.000625225 | 2116         |              |      |
| AST.resultn    | <  | 141.5       | ALB.resultn    | =  | Missing     | Missing       | -0.000335605 | 2116         |              |      |
| AST.resultn    | <  | 141.5       | ALB.resultn    | <  | 3.735       | PLT.resultn   | =            | Missing      | 0.000777454  | 2116 |
| AST.resultn    | <  | 141.5       | ALB.resultn    | <  | 3.735       | PLT.resultn   | <            | 215          | 0.003109817  | 2116 |
| AST.resultn    | <  | 141.5       | ALB.resultn    | <  | 3.735       | PLT.resultn   | >=           | 215          | 0            | 2116 |
| AST.resultn    | <  | 141.5       | ALB.resultn    | >= | 3.735       |               | Missing      | -0.000986323 | 2116         |      |
| AST.resultn    | >= | 141.5       |                |    |             | Missing       | -0.001068009 | 2116         |              |      |
| TBILI.resultn  | =  | Missing     |                |    |             | Missing       | -0.000541913 | 2117         |              |      |
| TBILI.resultn  | <  | 2.85        | ALK.times.uln  | =  | Missing     | ALB.resultn   | =            | Missing      | 0.000404456  | 2117 |
| TBILI.resultn  | <  | 2.85        | ALK.times.uln  | =  | Missing     | ALB.resultn   | <            | 3.95         | 0.001402115  | 2117 |
| TBILI.resultn  | <  | 2.85        | ALK.times.uln  | =  | Missing     | ALB.resultn   | >=           | 3.95         | 0            | 2117 |
| TBILI.resultn  | <  | 2.85        | ALK.times.uln  | <  | 5.438574341 |               | Missing      | 0.000198202  | 2117         |      |



|               |    |             |                |    |             |                    |              |              |
|---------------|----|-------------|----------------|----|-------------|--------------------|--------------|--------------|
| TBILL.resultn | <  | 2.85        | ALK.times.uln  | >= | 5.438574341 | Missing            | 0.001967128  | 2117         |
| TBILL.resultn | >= | 2.85        |                |    |             | Missing            | 7.03E-05     | 2117         |
| age.yrs       | =  | Missing     |                |    |             | Missing            | -0.001315795 | 2118         |
| age.yrs       | <  | 69.76043806 | AST.resultn    | =  | Missing     | Missing            | -0.002292287 | 2118         |
| age.yrs       | <  | 69.76043806 | AST.resultn    | <  | 141         | TBILL.resultn      | =            | Missing      |
| age.yrs       | <  | 69.76043806 | AST.resultn    | <  | 141         | TBILL.resultn      | <            | 2.05         |
| age.yrs       | <  | 69.76043806 | AST.resultn    | <  | 141         | TBILL.resultn      | >=           | 2.05         |
| age.yrs       | <  | 69.76043806 | AST.resultn    | >= | 141         |                    | Missing      | -0.001768823 |
| age.yrs       | >= | 69.76043806 |                |    |             | Missing            | 0.001750035  | 2118         |
| ALK.times.uln | =  | Missing     | TBILL.resultn  | =  | Missing     |                    | -0.000320679 | 2119         |
| ALK.times.uln | =  | Missing     | TBILL.resultn  | <  | 1.55        |                    | 0.000310955  | 2119         |
| ALK.times.uln | =  | Missing     | TBILL.resultn  | >= | 1.55        |                    | 0.001432523  | 2119         |
| ALK.times.uln | <  | 5.412513212 | TBILL.resultn  | =  | Missing     |                    | 0.000246231  | 2119         |
| ALK.times.uln | <  | 5.412513212 | TBILL.resultn  | <  | 2.05        |                    | 0.000272851  | 2119         |
| ALK.times.uln | <  | 5.412513212 | TBILL.resultn  | >= | 2.05        |                    | 0            | 2119         |
| ALK.times.uln | >= | 5.412513212 |                |    |             |                    | 0.00140691   | 2119         |
| age.yrs       | =  | Missing     |                |    |             | Missing            | 0.000788546  | 2120         |
| age.yrs       | <  | 53.4715948  |                |    |             | Missing            | 0.000579368  | 2120         |
| age.yrs       | >= | 53.4715948  | Sodium.resultn | =  | Missing     | Missing            | -6.11E-06    | 2120         |
| age.yrs       | >= | 53.4715948  | Sodium.resultn | <  | 138.5       | Missing            | 0.003184925  | 2120         |
| age.yrs       | >= | 53.4715948  | Sodium.resultn | >= | 138.5       | ALB.resultn        | =            | Missing      |
| age.yrs       | >= | 53.4715948  | Sodium.resultn | >= | 138.5       | ALB.resultn        | <            | 4.15         |
| age.yrs       | >= | 53.4715948  | Sodium.resultn | >= | 138.5       | ALB.resultn        | >=           | 4.15         |
| age.yrs       | =  | Missing     |                |    |             | Missing            | -0.002361477 | 2121         |
| age.yrs       | <  | 53.46475017 |                |    |             | Missing            | -0.002505444 | 2121         |
| age.yrs       | >= | 53.46475017 | psc.yrs.dur    | =  | Missing     | Missing            | -0.002030538 | 2121         |
| age.yrs       | >= | 53.46475017 | psc.yrs.dur    | <  | 0.476386037 | Missing            | -0.003143201 | 2121         |
| age.yrs       | >= | 53.46475017 | psc.yrs.dur    | >= | 0.476386037 | AST.resultn        | =            | Missing      |
| age.yrs       | >= | 53.46475017 | psc.yrs.dur    | >= | 0.476386037 | AST.resultn        | <            | 64           |
| age.yrs       | >= | 53.46475017 | psc.yrs.dur    | >= | 0.476386037 | AST.resultn        | >=           | 64           |
| TBILL.resultn | =  | Missing     |                |    |             | Missing            | 0.001129153  | 2122         |
| TBILL.resultn | <  | 3.75        | TBILL.resultn  | =  | Missing     | Missing            | 0.001175258  | 2122         |
| TBILL.resultn | <  | 3.75        | TBILL.resultn  | <  | 1.65        | Missing            | 0.001028267  | 2122         |
| TBILL.resultn | <  | 3.75        | TBILL.resultn  | >= | 1.65        | Hemoglobin.resultn | =            | Missing      |
| TBILL.resultn | <  | 3.75        | TBILL.resultn  | >= | 1.65        | Hemoglobin.resultn | <            | 14.05        |
| TBILL.resultn | <  | 3.75        | TBILL.resultn  | >= | 1.65        | Hemoglobin.resultn | >=           | 14.05        |
| TBILL.resultn | >= | 3.75        |                |    |             | Missing            | 0.000573624  | 2122         |
| ALK.times.uln | =  | Missing     | psc.yrs.dur    | =  | Missing     |                    | -0.000185928 | 2123         |
| ALK.times.uln | =  | Missing     | psc.yrs.dur    | <  | 0.124572211 |                    | -0.000945132 | 2123         |
| ALK.times.uln | =  | Missing     | psc.yrs.dur    | >= | 0.124572211 |                    | 0            | 2123         |
| ALK.times.uln | <  | 5.462893197 | TBILL.resultn  | =  | Missing     |                    | -0.000562955 | 2123         |
| ALK.times.uln | <  | 5.462893197 | TBILL.resultn  | <  | 2.85        |                    | -0.000669236 | 2123         |
| ALK.times.uln | <  | 5.462893197 | TBILL.resultn  | >= | 2.85        |                    | 0.000973284  | 2123         |
| ALK.times.uln | >= | 5.462893197 |                |    |             |                    | 0.000355716  | 2123         |
| ALK.times.uln | =  | Missing     | ALB.resultn    | =  | Missing     |                    | -0.000410994 | 2124         |
| ALK.times.uln | =  | Missing     | ALB.resultn    | <  | 3.95        |                    | 0.003634382  | 2124         |
| ALK.times.uln | =  | Missing     | ALB.resultn    | >= | 3.95        |                    | -0.000390542 | 2124         |
| ALK.times.uln | <  | 5.446215139 | TBILL.resultn  | =  | Missing     |                    | -0.00032191  | 2124         |
| ALK.times.uln | <  | 5.446215139 | TBILL.resultn  | <  | 1.25        |                    | -0.000400651 | 2124         |
| ALK.times.uln | <  | 5.446215139 | TBILL.resultn  | >= | 1.25        |                    | 0            | 2124         |
| ALK.times.uln | >= | 5.446215139 |                |    |             |                    | 0.001370091  | 2124         |
| ALB.resultn   | =  | Missing     |                |    |             | Missing            | -0.001807898 | 2125         |
| ALB.resultn   | <  | 3.05        |                |    |             | Missing            | 0.000258922  | 2125         |
| ALB.resultn   | >= | 3.05        | TBILL.resultn  | =  | Missing     | Missing            | -0.000996361 | 2125         |
| ALB.resultn   | >= | 3.05        | TBILL.resultn  | <  | 2.85        | TBILL.resultn      | =            | Missing      |
| ALB.resultn   | >= | 3.05        | TBILL.resultn  | <  | 2.85        | TBILL.resultn      | <            | 1.25         |
| ALB.resultn   | >= | 3.05        | TBILL.resultn  | <  | 2.85        | TBILL.resultn      | >=           | 1.25         |
| ALB.resultn   | >= | 3.05        | TBILL.resultn  | >= | 2.85        |                    | Missing      | -0.001136237 |
| ALK.times.uln | =  | Missing     |                |    |             | Missing            | -0.002925662 | 2126         |
| ALK.times.uln | <  | 5.462893197 | PLT.resultn    | =  | Missing     | Missing            | -0.00145653  | 2126         |
| ALK.times.uln | <  | 5.462893197 | PLT.resultn    | <  | 209.5       | ALK.times.uln      | =            | Missing      |
| ALK.times.uln | <  | 5.462893197 | PLT.resultn    | <  | 209.5       | ALK.times.uln      | <            | 2.228306349  |

|                    |    |             |               |    |             |               |    |             |              |      |
|--------------------|----|-------------|---------------|----|-------------|---------------|----|-------------|--------------|------|
| ALK.times.uln      | <  | 5.462893197 | PLT.resultn   | <  | 209.5       | ALK.times.uln | >= | 2.228306349 | 0            | 2126 |
| ALK.times.uln      | <  | 5.462893197 | PLT.resultn   | >= | 209.5       | Missing       |    | Missing     | -0.003096487 | 2126 |
| ALK.times.uln      | >= | 5.462893197 |               |    |             | Missing       |    | Missing     | -0.0017684   | 2126 |
| psc.yrs.dur        | =  | Missing     |               |    |             | Missing       |    | Missing     | -0.000272374 | 2127 |
| psc.yrs.dur        | <  | 13.34291581 | TBILL.resultn | =  | Missing     | Missing       |    | Missing     | 0.000673535  | 2127 |
| psc.yrs.dur        | <  | 13.34291581 | TBILL.resultn | <  | 3.15        | ALK.times.uln | =  | Missing     | 0            | 2127 |
| psc.yrs.dur        | <  | 13.34291581 | TBILL.resultn | <  | 3.15        | ALK.times.uln | <  | 5.462893197 | -0.000608252 | 2127 |
| psc.yrs.dur        | <  | 13.34291581 | TBILL.resultn | <  | 3.15        | ALK.times.uln | >= | 5.462893197 | 0.000877102  | 2127 |
| psc.yrs.dur        | <  | 13.34291581 | TBILL.resultn | >= | 3.15        | Missing       |    | Missing     | -0.000421822 | 2127 |
| psc.yrs.dur        | >= | 13.34291581 |               |    |             | Missing       |    | Missing     | 0.001674093  | 2127 |
| ALB.resultn        | =  | Missing     |               |    |             | Missing       |    | Missing     | -0.000854368 | 2128 |
| ALB.resultn        | <  | 2.965       |               |    |             | Missing       |    | Missing     | 0.000288627  | 2128 |
| ALB.resultn        | >= | 2.965       | TBILL.resultn | =  | Missing     | Missing       |    | Missing     | -0.000989754 | 2128 |
| ALB.resultn        | >= | 2.965       | TBILL.resultn | <  | 2.75        | TBILL.resultn | =  | Missing     | -0.000980433 | 2128 |
| ALB.resultn        | >= | 2.965       | TBILL.resultn | <  | 2.75        | TBILL.resultn | <  | 0.85        | -0.001699417 | 2128 |
| ALB.resultn        | >= | 2.965       | TBILL.resultn | <  | 2.75        | TBILL.resultn | >= | 0.85        | 0            | 2128 |
| ALB.resultn        | >= | 2.965       | TBILL.resultn | >= | 2.75        | Missing       |    | Missing     | -0.001138892 | 2128 |
| ALB.resultn        | =  | Missing     |               |    |             | Missing       |    | Missing     | -0.001954804 | 2129 |
| ALB.resultn        | <  | 2.95        |               |    |             | Missing       |    | Missing     | 0.000264122  | 2129 |
| ALB.resultn        | >= | 2.95        | TBILL.resultn | =  | Missing     | Missing       |    | Missing     | -0.001122303 | 2129 |
| ALB.resultn        | >= | 2.95        | TBILL.resultn | <  | 3.15        | psc.yrs.dur   | =  | Missing     | -0.001104999 | 2129 |
| ALB.resultn        | >= | 2.95        | TBILL.resultn | <  | 3.15        | psc.yrs.dur   | <  | 2.05065024  | -0.001576362 | 2129 |
| ALB.resultn        | >= | 2.95        | TBILL.resultn | <  | 3.15        | psc.yrs.dur   | >= | 2.05065024  | 0            | 2129 |
| ALB.resultn        | >= | 2.95        | TBILL.resultn | >= | 3.15        | Missing       |    | Missing     | -0.001475317 | 2129 |
| Sodium.resultn     | =  | Missing     |               |    |             |               |    |             | -0.000673266 | 2130 |
| Sodium.resultn     | <  | 141.5       | ALK.times.uln | =  | Missing     |               |    |             | 0            | 2130 |
| Sodium.resultn     | <  | 141.5       | ALK.times.uln | <  | 2.795652174 |               |    |             | -0.000870469 | 2130 |
| Sodium.resultn     | <  | 141.5       | ALK.times.uln | >= | 2.795652174 |               |    |             | 0.000956345  | 2130 |
| Sodium.resultn     | >= | 141.5       | ALB.resultn   | =  | Missing     |               |    |             | -0.001186475 | 2130 |
| Sodium.resultn     | >= | 141.5       | ALB.resultn   | <  | 3.38        |               |    |             | -0.00079748  | 2130 |
| Sodium.resultn     | >= | 141.5       | ALB.resultn   | >= | 3.38        |               |    |             | -0.00131614  | 2130 |
| Sodium.resultn     | =  | Missing     |               |    |             | Missing       |    | Missing     | -0.002398557 | 2131 |
| Sodium.resultn     | <  | 136.5       |               |    |             | Missing       |    | Missing     | -0.000928756 | 2131 |
| Sodium.resultn     | >= | 136.5       | ALK.times.uln | =  | Missing     |               |    | Missing     | -0.001865964 | 2131 |
| Sodium.resultn     | >= | 136.5       | ALK.times.uln | <  | 2.843304606 |               |    | Missing     | -0.002887589 | 2131 |
| Sodium.resultn     | >= | 136.5       | ALK.times.uln | >= | 2.843304606 | age.yrs       | =  | Missing     | -0.001591691 | 2131 |
| Sodium.resultn     | >= | 136.5       | ALK.times.uln | >= | 2.843304606 | age.yrs       | <  | 46.56947296 | -0.002893983 | 2131 |
| Sodium.resultn     | >= | 136.5       | ALK.times.uln | >= | 2.843304606 | age.yrs       | >= | 46.56947296 | 0            | 2131 |
| Hemoglobin.resultn | =  | Missing     |               |    |             | Missing       |    | Missing     | 0.000568474  | 2132 |
| Hemoglobin.resultn | <  | 13.85       | PLT.resultn   | =  | Missing     |               |    | Missing     | 0.001283648  | 2132 |
| Hemoglobin.resultn | <  | 13.85       | PLT.resultn   | <  | 209.5       |               |    | Missing     | 0.002767814  | 2132 |
| Hemoglobin.resultn | <  | 13.85       | PLT.resultn   | >= | 209.5       | TBILL.resultn | =  | Missing     | 0.0010138    | 2132 |
| Hemoglobin.resultn | <  | 13.85       | PLT.resultn   | >= | 209.5       | TBILL.resultn | <  | 1.95        | 0.00121002   | 2132 |
| Hemoglobin.resultn | <  | 13.85       | PLT.resultn   | >= | 209.5       | TBILL.resultn | >= | 1.95        | 0            | 2132 |
| Hemoglobin.resultn | >= | 13.85       |               |    |             | Missing       |    | Missing     | -0.000100028 | 2132 |
| AST.resultn        | =  | Missing     |               |    |             | Missing       |    | Missing     | -0.009452427 | 2133 |
| AST.resultn        | <  | 43          |               |    |             | Missing       |    | Missing     | -0.009446638 | 2133 |
| AST.resultn        | >= | 43          | AST.resultn   | =  | Missing     |               |    | Missing     | -0.007577106 | 2133 |
| AST.resultn        | >= | 43          | AST.resultn   | <  | 59.5        | PLT.resultn   | =  | Missing     | -0.004491976 | 2133 |
| AST.resultn        | >= | 43          | AST.resultn   | <  | 59.5        | PLT.resultn   | <  | 270         | -0.007134315 | 2133 |
| AST.resultn        | >= | 43          | AST.resultn   | <  | 59.5        | PLT.resultn   | >= | 270         | 0            | 2133 |
| AST.resultn        | >= | 43          | AST.resultn   | >= | 59.5        | Missing       |    | Missing     | -0.008408749 | 2133 |
| age.yrs            | =  | Missing     |               |    |             | Missing       |    | Missing     | -0.001112575 | 2134 |
| age.yrs            | <  | 54.96783025 |               |    |             | Missing       |    | Missing     | -0.001222264 | 2134 |
| age.yrs            | >= | 54.96783025 | AST.resultn   | =  | Missing     |               |    | Missing     | -0.000665041 | 2134 |
| age.yrs            | >= | 54.96783025 | AST.resultn   | <  | 51.5        |               |    | Missing     | -0.001886574 | 2134 |
| age.yrs            | >= | 54.96783025 | AST.resultn   | >= | 51.5        | ALB.resultn   | =  | Missing     | 0.000458769  | 2134 |
| age.yrs            | >= | 54.96783025 | AST.resultn   | >= | 51.5        | ALB.resultn   | <  | 4           | 0.001055169  | 2134 |
| age.yrs            | >= | 54.96783025 | AST.resultn   | >= | 51.5        | ALB.resultn   | >= | 4           | 0            | 2134 |
| psc.yrs.dur        | =  | Missing     |               |    |             | Missing       |    | Missing     | -0.000271528 | 2135 |
| psc.yrs.dur        | <  | 1.961670089 |               |    |             | Missing       |    | Missing     | -0.000589757 | 2135 |
| psc.yrs.dur        | >= | 1.961670089 | psc.yrs.dur   | =  | Missing     |               |    | Missing     | 0.000408148  | 2135 |

|               |    |             |               |    |             |               |         |             |              |      |
|---------------|----|-------------|---------------|----|-------------|---------------|---------|-------------|--------------|------|
| psc.yrs.dur   | >= | 1.961670089 | psc.yrs.dur   | <  | 2.480492813 |               | Missing | 0.002307671 | 2135         |      |
| psc.yrs.dur   | >= | 1.961670089 | psc.yrs.dur   | >= | 2.480492813 | PLT.resultn   | =       | Missing     | 0.000140609  | 2135 |
| psc.yrs.dur   | >= | 1.961670089 | psc.yrs.dur   | >= | 2.480492813 | PLT.resultn   | <       | 204.5       | 0.000928022  | 2135 |
| psc.yrs.dur   | >= | 1.961670089 | psc.yrs.dur   | >= | 2.480492813 | PLT.resultn   | >=      | 204.5       | 0            | 2135 |
| age.yrs       | =  | Missing     |               |    |             |               |         | Missing     | -0.003108297 | 2136 |
| age.yrs       | <  | 53.35934292 |               |    |             |               |         | Missing     | -0.003273921 | 2136 |
| age.yrs       | >= | 53.35934292 | psc.yrs.dur   | =  | Missing     |               |         | Missing     | -0.002713009 | 2136 |
| age.yrs       | >= | 53.35934292 | psc.yrs.dur   | <  | 0.746064339 |               |         | Missing     | -0.003169138 | 2136 |
| age.yrs       | >= | 53.35934292 | psc.yrs.dur   | >= | 0.746064339 | AST.resultn   | =       | Missing     | -0.002218869 | 2136 |
| age.yrs       | >= | 53.35934292 | psc.yrs.dur   | >= | 0.746064339 | AST.resultn   | <       | 57.5        | -0.003883021 | 2136 |
| age.yrs       | >= | 53.35934292 | psc.yrs.dur   | >= | 0.746064339 | AST.resultn   | >=      | 57.5        | 0            | 2136 |
| ALK.times.uln | =  | Missing     | TBILL.resultn | =  | Missing     |               |         |             | -0.000611808 | 2137 |
| ALK.times.uln | =  | Missing     | TBILL.resultn | <  | 1.1         |               |         |             | -0.001167936 | 2137 |
| ALK.times.uln | =  | Missing     | TBILL.resultn | >= | 1.1         |               |         |             | 0.000937404  | 2137 |
| ALK.times.uln | <  | 3.593257185 |               |    |             |               |         |             | -0.000954868 | 2137 |
| ALK.times.uln | >= | 3.593257185 | AST.resultn   | =  | Missing     |               |         |             | 0.000531997  | 2137 |
| ALK.times.uln | >= | 3.593257185 | AST.resultn   | <  | 75.5        |               |         |             | 0.001808791  | 2137 |
| ALK.times.uln | >= | 3.593257185 | AST.resultn   | >= | 75.5        |               |         |             | 0            | 2137 |
| PLT.resultn   | =  | Missing     | psc.yrs.dur   | =  | Missing     |               |         |             | 0.000452793  | 2138 |
| PLT.resultn   | =  | Missing     | psc.yrs.dur   | <  | 0.288843258 |               |         |             | -0.001080793 | 2138 |
| PLT.resultn   | =  | Missing     | psc.yrs.dur   | >= | 0.288843258 |               |         |             | 0.002088618  | 2138 |
| PLT.resultn   | <  | 171.5       |               |    |             |               |         |             | 0.001593647  | 2138 |
| PLT.resultn   | >= | 171.5       | ALK.times.uln | =  | Missing     |               |         |             | 0            | 2138 |
| PLT.resultn   | >= | 171.5       | ALK.times.uln | <  | 7.861978174 |               |         |             | -0.000164483 | 2138 |
| PLT.resultn   | >= | 171.5       | ALK.times.uln | >= | 7.861978174 |               |         |             | -0.000693579 | 2138 |
| ALK.times.uln | =  | Missing     |               |    |             |               |         |             | -0.001019271 | 2139 |
| ALK.times.uln | <  | 5.462893197 | psc.yrs.dur   | =  | Missing     |               |         |             | -0.000819163 | 2139 |
| ALK.times.uln | <  | 5.462893197 | psc.yrs.dur   | <  | 2.05065024  |               |         |             | -0.001171199 | 2139 |
| ALK.times.uln | <  | 5.462893197 | psc.yrs.dur   | >= | 2.05065024  |               |         |             | 0            | 2139 |
| ALK.times.uln | >= | 5.462893197 | AST.resultn   | =  | Missing     |               |         |             | 0.000285835  | 2139 |
| ALK.times.uln | >= | 5.462893197 | AST.resultn   | <  | 112.5       |               |         |             | 0.001449522  | 2139 |
| ALK.times.uln | >= | 5.462893197 | AST.resultn   | >= | 112.5       |               |         |             | -0.000683905 | 2139 |
| AST.resultn   | =  | Missing     |               |    |             |               |         | Missing     | -0.001094093 | 2140 |
| AST.resultn   | <  | 52.5        |               |    |             |               |         | Missing     | -0.001076275 | 2140 |
| AST.resultn   | >= | 52.5        | AST.resultn   | =  | Missing     |               |         | Missing     | 0.000427289  | 2140 |
| AST.resultn   | >= | 52.5        | AST.resultn   | <  | 65.5        |               |         | Missing     | 0.002975737  | 2140 |
| AST.resultn   | >= | 52.5        | AST.resultn   | >= | 65.5        | PLT.resultn   | =       | Missing     | 0            | 2140 |
| AST.resultn   | >= | 52.5        | AST.resultn   | >= | 65.5        | PLT.resultn   | <       | 210.5       | 0.001022012  | 2140 |
| AST.resultn   | >= | 52.5        | AST.resultn   | >= | 65.5        | PLT.resultn   | >=      | 210.5       | -0.000669311 | 2140 |
| ALK.times.uln | =  | Missing     | psc.yrs.dur   | =  | Missing     |               |         | Missing     | -0.002044588 | 2141 |
| ALK.times.uln | =  | Missing     | psc.yrs.dur   | <  | 0.106776181 |               |         | Missing     | -0.002715893 | 2141 |
| ALK.times.uln | =  | Missing     | psc.yrs.dur   | >= | 0.106776181 | TBILL.resultn | =       | Missing     | -0.001873917 | 2141 |
| ALK.times.uln | =  | Missing     | psc.yrs.dur   | >= | 0.106776181 | TBILL.resultn | <       | 1.31        | -0.002602662 | 2141 |
| ALK.times.uln | =  | Missing     | psc.yrs.dur   | >= | 0.106776181 | TBILL.resultn | >=      | 1.31        | 0            | 2141 |
| ALK.times.uln | <  | 6.02        |               |    |             |               |         | Missing     | -0.002448511 | 2141 |
| ALK.times.uln | >= | 6.02        |               |    |             |               |         | Missing     | -0.001014481 | 2141 |
| PLT.resultn   | =  | Missing     |               |    |             |               |         | Missing     | -0.003035782 | 2142 |
| PLT.resultn   | <  | 185.5       |               |    |             |               |         | Missing     | -0.000457527 | 2142 |
| PLT.resultn   | >= | 185.5       | ALB.resultn   | =  | Missing     |               |         | Missing     | 0.000221633  | 2142 |
| PLT.resultn   | >= | 185.5       | ALB.resultn   | <  | 3.135       |               |         | Missing     | -0.002536999 | 2142 |
| PLT.resultn   | >= | 185.5       | ALB.resultn   | >= | 3.135       | psc.yrs.dur   | =       | Missing     | -0.002261714 | 2142 |
| PLT.resultn   | >= | 185.5       | ALB.resultn   | >= | 3.135       | psc.yrs.dur   | <       | 6.262833676 | -0.002519378 | 2142 |
| PLT.resultn   | >= | 185.5       | ALB.resultn   | >= | 3.135       | psc.yrs.dur   | >=      | 6.262833676 | 0            | 2142 |
| PLT.resultn   | =  | Missing     |               |    |             |               |         | Missing     | -0.000675723 | 2143 |
| PLT.resultn   | <  | 170         |               |    |             |               |         | Missing     | 0.001016701  | 2143 |
| PLT.resultn   | >= | 170         | TBILL.resultn | =  | Missing     |               |         | Missing     | -0.000599883 | 2143 |
| PLT.resultn   | >= | 170         | TBILL.resultn | <  | 3.15        | TBILL.resultn | =       | Missing     | -0.001305857 | 2143 |
| PLT.resultn   | >= | 170         | TBILL.resultn | <  | 3.15        | TBILL.resultn | <       | 1.55        | -0.001466225 | 2143 |
| PLT.resultn   | >= | 170         | TBILL.resultn | <  | 3.15        | TBILL.resultn | >=      | 1.55        | 0            | 2143 |
| PLT.resultn   | >= | 170         | TBILL.resultn | >= | 3.15        |               |         | Missing     | -0.001671052 | 2143 |
| TBILL.resultn | =  | Missing     |               |    |             |               |         | Missing     | -0.002374822 | 2144 |
| TBILL.resultn | <  | 0.75        |               |    |             |               |         | Missing     | -0.00218395  | 2144 |

|                    |    |                                |    |                         |    |             |              |      |
|--------------------|----|--------------------------------|----|-------------------------|----|-------------|--------------|------|
| TBILL.resultn      | >= | 0.75 age.yrs                   | =  | Missing                 |    | Missing     | -0.001228407 | 2144 |
| TBILL.resultn      | >= | 0.75 age.yrs                   | <  | 53.64681725             |    | Missing     | -0.001433957 | 2144 |
| TBILL.resultn      | >= | 0.75 age.yrs                   | >= | 53.64681725 AST.resultn | =  | Missing     | -0.00074308  | 2144 |
| TBILL.resultn      | >= | 0.75 age.yrs                   | >= | 53.64681725 AST.resultn | <  | 50          | -0.002364346 | 2144 |
| TBILL.resultn      | >= | 0.75 age.yrs                   | >= | 53.64681725 AST.resultn | >= | 50          | 0            | 2144 |
| Sodium.resultn     | =  | Missing                        |    |                         |    | Missing     | 2.46E-05     | 2145 |
| Sodium.resultn     | <  | 136.5                          |    |                         |    | Missing     | 0.001684651  | 2145 |
| Sodium.resultn     | >= | 136.5 psc.yrs.dur              | =  | Missing                 |    | Missing     | 1.22E-05     | 2145 |
| Sodium.resultn     | >= | 136.5 psc.yrs.dur              | <  | 9.856262834 ALB.resultn | =  | Missing     | 7.44E-05     | 2145 |
| Sodium.resultn     | >= | 136.5 psc.yrs.dur              | <  | 9.856262834 ALB.resultn | <  | 3.13        | 0.000907459  | 2145 |
| Sodium.resultn     | >= | 136.5 psc.yrs.dur              | <  | 9.856262834 ALB.resultn | >= | 3.13        | 0            | 2145 |
| Sodium.resultn     | >= | 136.5 psc.yrs.dur              | >= | 9.856262834             |    | Missing     | -0.000452282 | 2145 |
| PLT.resultn        | =  | Missing                        |    |                         |    | Missing     | -0.001823131 | 2146 |
| PLT.resultn        | <  | 246.5 ALK.times.uln            | =  | Missing age.yrs         | =  | Missing     | -0.000969724 | 2146 |
| PLT.resultn        | <  | 246.5 ALK.times.uln            | =  | Missing age.yrs         | <  | 53.44969199 | -0.002181878 | 2146 |
| PLT.resultn        | <  | 246.5 ALK.times.uln            | =  | Missing age.yrs         | >= | 53.44969199 | 0            | 2146 |
| PLT.resultn        | <  | 246.5 ALK.times.uln            | <  | 2.823748484             |    | Missing     | -0.002422432 | 2146 |
| PLT.resultn        | <  | 246.5 ALK.times.uln            | >= | 2.823748484             |    | Missing     | -6.72E-05    | 2146 |
| PLT.resultn        | >= | 246.5                          |    |                         |    | Missing     | -0.002209912 | 2146 |
| PLT.resultn        | =  | Missing TBILL.resultn          | =  | Missing                 |    |             | -0.001597671 | 2147 |
| PLT.resultn        | =  | Missing TBILL.resultn          | <  | 0.95                    |    |             | -0.002738865 | 2147 |
| PLT.resultn        | =  | Missing TBILL.resultn          | >= | 0.95                    |    |             | 0            | 2147 |
| PLT.resultn        | <  | 170                            |    |                         |    |             | 0.000229019  | 2147 |
| PLT.resultn        | >= | 170 TBILL.resultn              | =  | Missing                 |    |             | -0.000399543 | 2147 |
| PLT.resultn        | >= | 170 TBILL.resultn              | <  | 3.15                    |    |             | -0.001876233 | 2147 |
| PLT.resultn        | >= | 170 TBILL.resultn              | >= | 3.15                    |    |             | -0.002238964 | 2147 |
| age.yrs            | =  | Missing                        |    |                         |    | Missing     | -0.003252493 | 2148 |
| age.yrs            | <  | 53.4715948                     |    |                         |    | Missing     | -0.003341214 | 2148 |
| age.yrs            | >= | 53.4715948 psc.yrs.dur         | =  | Missing                 |    | Missing     | -0.002989105 | 2148 |
| age.yrs            | >= | 53.4715948 psc.yrs.dur         | <  | 0.76659822              |    | Missing     | -0.003410943 | 2148 |
| age.yrs            | >= | 53.4715948 psc.yrs.dur         | >= | 0.76659822 AST.resultn  | =  | Missing     | -0.002331038 | 2148 |
| age.yrs            | >= | 53.4715948 psc.yrs.dur         | >= | 0.76659822 AST.resultn  | <  | 57          | -0.003885064 | 2148 |
| age.yrs            | >= | 53.4715948 psc.yrs.dur         | >= | 0.76659822 AST.resultn  | >= | 57          | 0            | 2148 |
| Hemoglobin.resultn | =  | Missing TBILL.resultn          | =  | Missing                 |    |             | 0.000693962  | 2149 |
| Hemoglobin.resultn | =  | Missing TBILL.resultn          | <  | 1.15                    |    |             | 2.85E-05     | 2149 |
| Hemoglobin.resultn | =  | Missing TBILL.resultn          | >= | 1.15                    |    |             | 0.001929738  | 2149 |
| Hemoglobin.resultn | <  | 11.25                          |    |                         |    |             | -0.000192691 | 2149 |
| Hemoglobin.resultn | >= | 11.25 psc.yrs.dur              | =  | Missing                 |    |             | 0.000191307  | 2149 |
| Hemoglobin.resultn | >= | 11.25 psc.yrs.dur              | <  | 0.001368925             |    |             | 0.002710183  | 2149 |
| Hemoglobin.resultn | >= | 11.25 psc.yrs.dur              | >= | 0.001368925             |    |             | 0            | 2149 |
| age.yrs            | =  | Missing                        |    |                         |    | Missing     | 0.000950026  | 2150 |
| age.yrs            | <  | 69.84257358 Hemoglobin.resultn | =  | Missing ALB.resultn     | =  | Missing     | 0            | 2150 |
| age.yrs            | <  | 69.84257358 Hemoglobin.resultn | =  | Missing ALB.resultn     | <  | 3.95        | 0.002901252  | 2150 |
| age.yrs            | <  | 69.84257358 Hemoglobin.resultn | =  | Missing ALB.resultn     | >= | 3.95        | 0.000639863  | 2150 |
| age.yrs            | <  | 69.84257358 Hemoglobin.resultn | <  | 12.15                   |    | Missing     | 0.00026836   | 2150 |
| age.yrs            | <  | 69.84257358 Hemoglobin.resultn | >= | 12.15                   |    | Missing     | 0.000873058  | 2150 |
| age.yrs            | >= | 69.84257358                    |    |                         |    | Missing     | 0.003473253  | 2150 |
| TBILL.resultn      | =  | Missing                        |    |                         |    | Missing     | -0.000899227 | 2151 |
| TBILL.resultn      | <  | 3.95 ALK.times.uln             | =  | Missing ALB.resultn     | =  | Missing     | 0.0002633    | 2151 |
| TBILL.resultn      | <  | 3.95 ALK.times.uln             | =  | Missing ALB.resultn     | <  | 3.55        | 0.0013165    | 2151 |
| TBILL.resultn      | <  | 3.95 ALK.times.uln             | =  | Missing ALB.resultn     | >= | 3.55        | 0            | 2151 |
| TBILL.resultn      | <  | 3.95 ALK.times.uln             | <  | 5.462893197             |    | Missing     | -0.000245209 | 2151 |
| TBILL.resultn      | <  | 3.95 ALK.times.uln             | >= | 5.462893197             |    | Missing     | 0.001199445  | 2151 |
| TBILL.resultn      | >= | 3.95                           |    |                         |    | Missing     | -0.000226428 | 2151 |
| psc.yrs.dur        | =  | Missing                        |    |                         |    |             | -0.000797575 | 2152 |
| psc.yrs.dur        | <  | 2.683093771 TBILL.resultn      | =  | Missing                 |    |             | 0            | 2152 |
| psc.yrs.dur        | <  | 2.683093771 TBILL.resultn      | <  | 3.05                    |    |             | -0.001067343 | 2152 |
| psc.yrs.dur        | <  | 2.683093771 TBILL.resultn      | >= | 3.05                    |    |             | -0.00146419  | 2152 |
| psc.yrs.dur        | >= | 2.683093771 TBILL.resultn      | =  | Missing                 |    |             | -0.000178584 | 2152 |
| psc.yrs.dur        | >= | 2.683093771 TBILL.resultn      | <  | 1.65                    |    |             | -0.000445995 | 2152 |
| psc.yrs.dur        | >= | 2.683093771 TBILL.resultn      | >= | 1.65                    |    |             | 0.000911631  | 2152 |
| ALB.resultn        | =  | Missing                        |    |                         |    | Missing     | -0.001116434 | 2153 |

|               |    |             |                    |    |             |                    |              |             |              |      |
|---------------|----|-------------|--------------------|----|-------------|--------------------|--------------|-------------|--------------|------|
| ALB.resultn   | <  | 2.965       |                    |    |             | Missing            | -0.000567437 | 2153        |              |      |
| ALB.resultn   | >= | 2.965       | ALB.resultn        | =  | Missing     | Missing            | -0.001842538 | 2153        |              |      |
| ALB.resultn   | >= | 2.965       | ALB.resultn        | <  | 3.135       | Missing            | -0.002222942 | 2153        |              |      |
| ALB.resultn   | >= | 2.965       | ALB.resultn        | >= | 3.135       | psc.yrs.dur        | =            | Missing     | -0.001823891 | 2153 |
| ALB.resultn   | >= | 2.965       | ALB.resultn        | >= | 3.135       | psc.yrs.dur        | <            | 8.020533881 | -0.001979116 | 2153 |
| ALB.resultn   | >= | 2.965       | ALB.resultn        | >= | 3.135       | psc.yrs.dur        | >=           | 8.020533881 | 0            | 2153 |
| ALK.times.uln | =  | Missing     | ALB.resultn        | =  | Missing     | Missing            | -0.003239734 | 2154        |              |      |
| ALK.times.uln | =  | Missing     | ALB.resultn        | <  | 3.86        | Missing            | -0.002698685 | 2154        |              |      |
| ALK.times.uln | =  | Missing     | ALB.resultn        | >= | 3.86        | TBILI.resultn      | =            | Missing     | -0.002371419 | 2154 |
| ALK.times.uln | =  | Missing     | ALB.resultn        | >= | 3.86        | TBILI.resultn      | <            | 0.95        | -0.003240939 | 2154 |
| ALK.times.uln | =  | Missing     | ALB.resultn        | >= | 3.86        | TBILI.resultn      | >=           | 0.95        | 0            | 2154 |
| ALK.times.uln | <  | 5.963877551 |                    |    |             | Missing            | -0.002521246 | 2154        |              |      |
| ALK.times.uln | >= | 5.963877551 |                    |    |             | Missing            | -0.001085845 | 2154        |              |      |
| ALB.resultn   | =  | Missing     |                    |    |             | Missing            | -0.001942672 | 2155        |              |      |
| ALB.resultn   | <  | 2.965       |                    |    |             | Missing            | -0.000496154 | 2155        |              |      |
| ALB.resultn   | >= | 2.965       | Hemoglobin.resultn | =  | Missing     | TBILI.resultn      | =            | Missing     | -0.001538782 | 2155 |
| ALB.resultn   | >= | 2.965       | Hemoglobin.resultn | =  | Missing     | TBILI.resultn      | <            | 1.15        | -0.002065208 | 2155 |
| ALB.resultn   | >= | 2.965       | Hemoglobin.resultn | =  | Missing     | TBILI.resultn      | >=           | 1.15        | 0            | 2155 |
| ALB.resultn   | >= | 2.965       | Hemoglobin.resultn | <  | 11.3        | Missing            | -0.00221509  | 2155        |              |      |
| ALB.resultn   | >= | 2.965       | Hemoglobin.resultn | >= | 11.3        | Missing            | -0.001946572 | 2155        |              |      |
| age.yrs       | =  | Missing     |                    |    |             | Missing            | -0.000690554 | 2156        |              |      |
| age.yrs       | <  | 69.76043806 | Sodium.resultn     | =  | Missing     | Missing            | -0.00106513  | 2156        |              |      |
| age.yrs       | <  | 69.76043806 | Sodium.resultn     | <  | 136.5       | Missing            | 0.000194149  | 2156        |              |      |
| age.yrs       | <  | 69.76043806 | Sodium.resultn     | >= | 136.5       | Hemoglobin.resultn | =            | Missing     | 0            | 2156 |
| age.yrs       | <  | 69.76043806 | Sodium.resultn     | >= | 136.5       | Hemoglobin.resultn | <            | 11.55       | -0.00115822  | 2156 |
| age.yrs       | <  | 69.76043806 | Sodium.resultn     | >= | 136.5       | Hemoglobin.resultn | >=           | 11.55       | -0.000974101 | 2156 |
| age.yrs       | >= | 69.76043806 |                    |    |             | Missing            | 0.001790931  | 2156        |              |      |
| ALK.times.uln | =  | Missing     | TBILI.resultn      | =  | Missing     |                    | 0            | 2157        |              |      |
| ALK.times.uln | =  | Missing     | TBILI.resultn      | <  | 1.31        |                    | 0.000578933  | 2157        |              |      |
| ALK.times.uln | =  | Missing     | TBILI.resultn      | >= | 1.31        |                    | 0.002027005  | 2157        |              |      |
| ALK.times.uln | <  | 6.338830603 | TBILI.resultn      | =  | Missing     |                    | 0.001057855  | 2157        |              |      |
| ALK.times.uln | <  | 6.338830603 | TBILI.resultn      | <  | 2.05        |                    | 0.000963058  | 2157        |              |      |
| ALK.times.uln | <  | 6.338830603 | TBILI.resultn      | >= | 2.05        |                    | 0.002024775  | 2157        |              |      |
| ALK.times.uln | >= | 6.338830603 |                    |    |             |                    | 0.000449209  | 2157        |              |      |
| ALK.times.uln | =  | Missing     |                    |    |             | Missing            | -0.001434029 | 2158        |              |      |
| ALK.times.uln | <  | 7.868810472 | TBILI.resultn      | =  | Missing     | Missing            | -0.001497522 | 2158        |              |      |
| ALK.times.uln | <  | 7.868810472 | TBILI.resultn      | <  | 0.75        | Missing            | -0.002060374 | 2158        |              |      |
| ALK.times.uln | <  | 7.868810472 | TBILI.resultn      | >= | 0.75        | ALK.times.uln      | =            | Missing     | -0.000996521 | 2158 |
| ALK.times.uln | <  | 7.868810472 | TBILI.resultn      | >= | 0.75        | ALK.times.uln      | <            | 6.02        | -0.001119548 | 2158 |
| ALK.times.uln | <  | 7.868810472 | TBILI.resultn      | >= | 0.75        | ALK.times.uln      | >=           | 6.02        | 0            | 2158 |
| ALK.times.uln | >= | 7.868810472 |                    |    |             | Missing            | -0.001818783 | 2158        |              |      |
| ALB.resultn   | =  | Missing     |                    |    |             | Missing            | -0.000457037 | 2159        |              |      |
| ALB.resultn   | <  | 3.135       |                    |    |             | Missing            | -0.000663302 | 2159        |              |      |
| ALB.resultn   | >= | 3.135       | TBILI.resultn      | =  | Missing     | Missing            | -0.000557331 | 2159        |              |      |
| ALB.resultn   | >= | 3.135       | TBILI.resultn      | <  | 0.75        | Missing            | -0.001310733 | 2159        |              |      |
| ALB.resultn   | >= | 3.135       | TBILI.resultn      | >= | 0.75        | Sodium.resultn     | =            | Missing     | 0            | 2159 |
| ALB.resultn   | >= | 3.135       | TBILI.resultn      | >= | 0.75        | Sodium.resultn     | <            | 137.5       | 0.001445738  | 2159 |
| ALB.resultn   | >= | 3.135       | TBILI.resultn      | >= | 0.75        | Sodium.resultn     | >=           | 137.5       | 6.94E-05     | 2159 |
| ALB.resultn   | =  | Missing     |                    |    |             | Missing            | -0.000152674 | 2160        |              |      |
| ALB.resultn   | <  | 2.95        |                    |    |             | Missing            | 0.000772124  | 2160        |              |      |
| ALB.resultn   | >= | 2.95        | TBILI.resultn      | =  | Missing     | Missing            | -0.000165513 | 2160        |              |      |
| ALB.resultn   | >= | 2.95        | TBILI.resultn      | <  | 2.9         | Sodium.resultn     | =            | Missing     | 0            | 2160 |
| ALB.resultn   | >= | 2.95        | TBILI.resultn      | <  | 2.9         | Sodium.resultn     | <            | 137.5       | 0.00070889   | 2160 |
| ALB.resultn   | >= | 2.95        | TBILI.resultn      | <  | 2.9         | Sodium.resultn     | >=           | 137.5       | -0.000504244 | 2160 |
| ALB.resultn   | >= | 2.95        | TBILI.resultn      | >= | 2.9         | Missing            | -0.000246788 | 2160        |              |      |
| TBILI.resultn | =  | Missing     |                    |    |             |                    | -0.000453068 | 2161        |              |      |
| TBILI.resultn | <  | 1.55        | ALK.times.uln      | =  | Missing     |                    | 0            | 2161        |              |      |
| TBILI.resultn | <  | 1.55        | ALK.times.uln      | <  | 2.822501299 |                    | -0.000139551 | 2161        |              |      |
| TBILI.resultn | <  | 1.55        | ALK.times.uln      | >= | 2.822501299 |                    | 0.001229647  | 2161        |              |      |
| TBILI.resultn | >= | 1.55        | Hemoglobin.resultn | =  | Missing     |                    | 0.000446495  | 2161        |              |      |
| TBILI.resultn | >= | 1.55        | Hemoglobin.resultn | <  | 13.75       |                    | 0.001259405  | 2161        |              |      |
| TBILI.resultn | >= | 1.55        | Hemoglobin.resultn | >= | 13.75       |                    | -0.000482545 | 2161        |              |      |

|                |    |                     |               |    |                         |                    |              |              |              |      |
|----------------|----|---------------------|---------------|----|-------------------------|--------------------|--------------|--------------|--------------|------|
| ALK.times.uln  | =  | Missing             | psc.yrs.dur   | =  | Missing                 | Missing            | -0.00247738  | 2162         |              |      |
| ALK.times.uln  | =  | Missing             | psc.yrs.dur   | <  | 0.847364819             | Missing            | -0.003243334 | 2162         |              |      |
| ALK.times.uln  | =  | Missing             | psc.yrs.dur   | >= | 0.847364819 age.yrs     | =                  | Missing      | -0.001445007 | 2162         |      |
| ALK.times.uln  | =  | Missing             | psc.yrs.dur   | >= | 0.847364819 age.yrs     | <                  | 51.56194387  | -0.002556551 | 2162         |      |
| ALK.times.uln  | =  | Missing             | psc.yrs.dur   | >= | 0.847364819 age.yrs     | >=                 | 51.56194387  | 0            | 2162         |      |
| ALK.times.uln  | <  | 5.963877551         |               |    |                         | Missing            | -0.003105975 | 2162         |              |      |
| ALK.times.uln  | >= | 5.963877551         |               |    |                         | Missing            | -0.001988553 | 2162         |              |      |
| psc.yrs.dur    | =  | Missing             |               |    |                         | Missing            | -0.002957328 | 2163         |              |      |
| psc.yrs.dur    | <  | 0.839151266         |               |    |                         | Missing            | -0.003286566 | 2163         |              |      |
| psc.yrs.dur    | >= | 0.839151266 age.yrs |               | =  | Missing                 | Missing            | -0.002546509 | 2163         |              |      |
| psc.yrs.dur    | >= | 0.839151266 age.yrs |               | <  | 53.46475017             | Missing            | -0.002756403 | 2163         |              |      |
| psc.yrs.dur    | >= | 0.839151266 age.yrs |               | >= | 53.46475017 AST.resultn | =                  | Missing      | -0.002015216 | 2163         |      |
| psc.yrs.dur    | >= | 0.839151266 age.yrs |               | >= | 53.46475017 AST.resultn | <                  | 54.5         | -0.003674805 | 2163         |      |
| psc.yrs.dur    | >= | 0.839151266 age.yrs |               | >= | 53.46475017 AST.resultn | >=                 | 54.5         | 0            | 2163         |      |
| ALK.times.uln  | =  | Missing             | TBILL.resultn | =  | Missing                 |                    | -0.000826717 | 2164         |              |      |
| ALK.times.uln  | =  | Missing             | TBILL.resultn | <  | 1.15                    |                    | -0.000370938 | 2164         |              |      |
| ALK.times.uln  | =  | Missing             | TBILL.resultn | >= | 1.15                    |                    | 0.001551285  | 2164         |              |      |
| ALK.times.uln  | <  | 7.861978174         | PLT.resultn   | =  | Missing                 |                    | 0.000121201  | 2164         |              |      |
| ALK.times.uln  | <  | 7.861978174         | PLT.resultn   | <  | 185.5                   |                    | 0.001519675  | 2164         |              |      |
| ALK.times.uln  | <  | 7.861978174         | PLT.resultn   | >= | 185.5                   |                    | 0            | 2164         |              |      |
| ALK.times.uln  | >= | 7.861978174         |               |    |                         |                    | -0.000310677 | 2164         |              |      |
| age.yrs        | =  | Missing             |               |    |                         | Missing            | -0.002392729 | 2165         |              |      |
| age.yrs        | <  | 70.96783025         | PLT.resultn   | =  | Missing                 | Missing            | -0.003298593 | 2165         |              |      |
| age.yrs        | <  | 70.96783025         | PLT.resultn   | <  | 249.5                   | PLT.resultn        | =            | Missing      | -0.001894028 | 2165 |
| age.yrs        | <  | 70.96783025         | PLT.resultn   | <  | 249.5                   | PLT.resultn        | <            | 242.5        | -0.002185417 | 2165 |
| age.yrs        | <  | 70.96783025         | PLT.resultn   | <  | 249.5                   | PLT.resultn        | >=           | 242.5        | 0            | 2165 |
| age.yrs        | <  | 70.96783025         | PLT.resultn   | >= | 249.5                   |                    | Missing      | -0.002692416 | 2165         |      |
| age.yrs        | >= | 70.96783025         |               |    |                         | Missing            | -0.000386716 | 2165         |              |      |
| PLT.resultn    | =  | Missing             |               |    |                         | Missing            | 0.001225359  | 2166         |              |      |
| PLT.resultn    | <  | 209.5               | TBILL.resultn | =  | Missing                 | Missing            | 0.001311344  | 2166         |              |      |
| PLT.resultn    | <  | 209.5               | TBILL.resultn | <  | 1.65                    | Hemoglobin.resultn | =            | Missing      | 0.001096172  | 2166 |
| PLT.resultn    | <  | 209.5               | TBILL.resultn | <  | 1.65                    | Hemoglobin.resultn | <            | 13.85        | 0.003288515  | 2166 |
| PLT.resultn    | <  | 209.5               | TBILL.resultn | <  | 1.65                    | Hemoglobin.resultn | >=           | 13.85        | 0            | 2166 |
| PLT.resultn    | <  | 209.5               | TBILL.resultn | >= | 1.65                    |                    | Missing      | 0.002128997  | 2166         |      |
| PLT.resultn    | >= | 209.5               |               |    |                         | Missing            | 0.000590465  | 2166         |              |      |
| ALK.times.uln  | =  | Missing             | TBILL.resultn | =  | Missing                 |                    | -0.003354887 | 2167         |              |      |
| ALK.times.uln  | =  | Missing             | TBILL.resultn | <  | 1.5                     |                    | -0.003562393 | 2167         |              |      |
| ALK.times.uln  | =  | Missing             | TBILL.resultn | >= | 1.5                     |                    | -0.00246261  | 2167         |              |      |
| ALK.times.uln  | <  | 5.446215139         | age.yrs       | =  | Missing                 |                    | -0.003296522 | 2167         |              |      |
| ALK.times.uln  | <  | 5.446215139         | age.yrs       | <  | 69.43052704             |                    | -0.003496311 | 2167         |              |      |
| ALK.times.uln  | <  | 5.446215139         | age.yrs       | >= | 69.43052704             |                    | 0            | 2167         |              |      |
| ALK.times.uln  | >= | 5.446215139         |               |    |                         |                    | -0.001735352 | 2167         |              |      |
| ALK.times.uln  | =  | Missing             | age.yrs       | =  | Missing                 |                    | -0.001174128 | 2168         |              |      |
| ALK.times.uln  | =  | Missing             | age.yrs       | <  | 53.46475017             |                    | -0.001556402 | 2168         |              |      |
| ALK.times.uln  | =  | Missing             | age.yrs       | >= | 53.46475017             |                    | 0            | 2168         |              |      |
| ALK.times.uln  | <  | 6.02173913          | PLT.resultn   | =  | Missing                 |                    | -0.000702794 | 2168         |              |      |
| ALK.times.uln  | <  | 6.02173913          | PLT.resultn   | <  | 186.5                   |                    | 0.001610607  | 2168         |              |      |
| ALK.times.uln  | <  | 6.02173913          | PLT.resultn   | >= | 186.5                   |                    | -0.001219671 | 2168         |              |      |
| ALK.times.uln  | >= | 6.02173913          |               |    |                         |                    | 0.000192307  | 2168         |              |      |
| PLT.resultn    | =  | Missing             |               |    |                         | Missing            | -0.002372295 | 2169         |              |      |
| PLT.resultn    | <  | 249.5               | ALK.times.uln | =  | Missing                 | Missing            | -0.001517278 | 2169         |              |      |
| PLT.resultn    | <  | 249.5               | ALK.times.uln | <  | 2.85059761              |                    | Missing      | -0.002497954 | 2169         |      |
| PLT.resultn    | <  | 249.5               | ALK.times.uln | >= | 2.85059761 age.yrs      | =                  | Missing      | -0.000673007 | 2169         |      |
| PLT.resultn    | <  | 249.5               | ALK.times.uln | >= | 2.85059761 age.yrs      | <                  | 46.74743326  | -0.001346014 | 2169         |      |
| PLT.resultn    | <  | 249.5               | ALK.times.uln | >= | 2.85059761 age.yrs      | >=                 | 46.74743326  | 0            | 2169         |      |
| PLT.resultn    | >= | 249.5               |               |    |                         | Missing            | -0.002462827 | 2169         |              |      |
| Sodium.resultn | =  | Missing             |               |    |                         | Missing            | -0.000580225 | 2170         |              |      |
| Sodium.resultn | <  | 136.5               |               |    |                         | Missing            | 0.000784995  | 2170         |              |      |
| Sodium.resultn | >= | 136.5               | ALB.resultn   | =  | Missing                 | Missing            | -0.000856873 | 2170         |              |      |
| Sodium.resultn | >= | 136.5               | ALB.resultn   | <  | 3.13                    | Missing            | -0.001077855 | 2170         |              |      |
| Sodium.resultn | >= | 136.5               | ALB.resultn   | >= | 3.13                    | ALK.times.uln      | =            | Missing      | 0            | 2170 |
| Sodium.resultn | >= | 136.5               | ALB.resultn   | >= | 3.13                    | ALK.times.uln      | <            | 2.905037968  | -0.001537272 | 2170 |

|                    |    |             |                    |    |             |                |    |             |              |      |
|--------------------|----|-------------|--------------------|----|-------------|----------------|----|-------------|--------------|------|
| Sodium.resultn     | >= | 136.5       | ALB.resultn        | >= | 3.13        | ALK.times.uln  | >= | 2.905037968 | 6.54E-05     | 2170 |
| TBILL.resultn      | =  | Missing     |                    |    |             |                |    |             | 3.75E-05     | 2171 |
| TBILL.resultn      | <  | 2.05        | ALB.resultn        | =  | Missing     |                |    |             | 0            | 2171 |
| TBILL.resultn      | <  | 2.05        | ALB.resultn        | <  | 3.225       |                |    |             | 0.00175552   | 2171 |
| TBILL.resultn      | <  | 2.05        | ALB.resultn        | >= | 3.225       |                |    |             | 0.000503971  | 2171 |
| TBILL.resultn      | >= | 2.05        | PLT.resultn        | =  | Missing     |                |    |             | 0.001826784  | 2171 |
| TBILL.resultn      | >= | 2.05        | PLT.resultn        | <  | 249.5       |                |    |             | 0.00260267   | 2171 |
| TBILL.resultn      | >= | 2.05        | PLT.resultn        | >= | 249.5       |                |    |             | 0.001121433  | 2171 |
| ALK.times.uln      | =  | Missing     | psc.yrs.dur        | =  | Missing     |                |    |             | -0.000839539 | 2172 |
| ALK.times.uln      | =  | Missing     | psc.yrs.dur        | <  | 0.431211499 |                |    |             | -0.001939623 | 2172 |
| ALK.times.uln      | =  | Missing     | psc.yrs.dur        | >= | 0.431211499 |                |    |             | 0            | 2172 |
| ALK.times.uln      | <  | 2.905037968 |                    |    |             |                |    |             | -0.002291213 | 2172 |
| ALK.times.uln      | >= | 2.905037968 | PLT.resultn        | =  | Missing     |                |    |             | -0.000889358 | 2172 |
| ALK.times.uln      | >= | 2.905037968 | PLT.resultn        | <  | 249.5       |                |    |             | 0.000504665  | 2172 |
| ALK.times.uln      | >= | 2.905037968 | PLT.resultn        | >= | 249.5       |                |    |             | -0.001649726 | 2172 |
| TBILL.resultn      | =  | Missing     |                    |    |             |                |    | Missing     | 0.00186724   | 2173 |
| TBILL.resultn      | <  | 3.25        | TBILL.resultn      | =  | Missing     |                |    | Missing     | 0.000200339  | 2173 |
| TBILL.resultn      | <  | 3.25        | TBILL.resultn      | <  | 1.65        | ALK.times.uln  | =  | Missing     | 0            | 2173 |
| TBILL.resultn      | <  | 3.25        | TBILL.resultn      | <  | 1.65        | ALK.times.uln  | <  | 2.822501299 | -0.000100462 | 2173 |
| TBILL.resultn      | <  | 3.25        | TBILL.resultn      | <  | 1.65        | ALK.times.uln  | >= | 2.822501299 | 0.001195887  | 2173 |
| TBILL.resultn      | <  | 3.25        | TBILL.resultn      | >= | 1.65        |                |    | Missing     | 0.001079743  | 2173 |
| TBILL.resultn      | >= | 3.25        |                    |    |             |                |    | Missing     | 8.42E-05     | 2173 |
| ALB.resultn        | =  | Missing     |                    |    |             |                |    |             | 3.97E-05     | 2174 |
| ALB.resultn        | <  | 3.35        | TBILL.resultn      | =  | Missing     |                |    |             | 0.001528354  | 2174 |
| ALB.resultn        | <  | 3.35        | TBILL.resultn      | <  | 0.95        |                |    |             | 0.000531431  | 2174 |
| ALB.resultn        | <  | 3.35        | TBILL.resultn      | >= | 0.95        |                |    |             | 0.00262497   | 2174 |
| ALB.resultn        | >= | 3.35        | ALK.times.uln      | =  | Missing     |                |    |             | 0            | 2174 |
| ALB.resultn        | >= | 3.35        | ALK.times.uln      | <  | 6.02173913  |                |    |             | -7.83E-05    | 2174 |
| ALB.resultn        | >= | 3.35        | ALK.times.uln      | >= | 6.02173913  |                |    |             | 0.00116202   | 2174 |
| Hemoglobin.resultn | =  | Missing     | ALB.resultn        | =  | Missing     |                |    |             | -0.005319954 | 2175 |
| Hemoglobin.resultn | =  | Missing     | ALB.resultn        | <  | 3.55        |                |    |             | -0.001660562 | 2175 |
| Hemoglobin.resultn | =  | Missing     | ALB.resultn        | >= | 3.55        |                |    |             | -0.003888141 | 2175 |
| Hemoglobin.resultn | <  | 11.3        |                    |    |             |                |    |             | -0.00481336  | 2175 |
| Hemoglobin.resultn | >= | 11.3        | age.yrs            | =  | Missing     |                |    |             | -0.004379362 | 2175 |
| Hemoglobin.resultn | >= | 11.3        | age.yrs            | <  | 67.10061602 |                |    |             | -0.004646396 | 2175 |
| Hemoglobin.resultn | >= | 11.3        | age.yrs            | >= | 67.10061602 |                |    |             | 0            | 2175 |
| Hemoglobin.resultn | =  | Missing     | TBILL.resultn      | =  | Missing     |                |    |             | -0.000405367 | 2176 |
| Hemoglobin.resultn | =  | Missing     | TBILL.resultn      | <  | 0.95        |                |    |             | -0.000403726 | 2176 |
| Hemoglobin.resultn | =  | Missing     | TBILL.resultn      | >= | 0.95        |                |    |             | 0.002333982  | 2176 |
| Hemoglobin.resultn | <  | 12.75       |                    |    |             |                |    |             | 0.000135352  | 2176 |
| Hemoglobin.resultn | >= | 12.75       | Hemoglobin.resultn | =  | Missing     |                |    |             | 0.000748402  | 2176 |
| Hemoglobin.resultn | >= | 12.75       | Hemoglobin.resultn | <  | 13.85       |                |    |             | 0.002757269  | 2176 |
| Hemoglobin.resultn | >= | 12.75       | Hemoglobin.resultn | >= | 13.85       |                |    |             | 0            | 2176 |
| Hemoglobin.resultn | =  | Missing     | TBILL.resultn      | =  | Missing     |                |    |             | -0.001165966 | 2177 |
| Hemoglobin.resultn | =  | Missing     | TBILL.resultn      | <  | 1.15        |                |    |             | -0.001603993 | 2177 |
| Hemoglobin.resultn | =  | Missing     | TBILL.resultn      | >= | 1.15        |                |    |             | -0.000180405 | 2177 |
| Hemoglobin.resultn | <  | 12.35       |                    |    |             |                |    |             | -0.00169994  | 2177 |
| Hemoglobin.resultn | >= | 12.35       | ALK.times.uln      | =  | Missing     |                |    |             | -0.001510384 | 2177 |
| Hemoglobin.resultn | >= | 12.35       | ALK.times.uln      | <  | 5.391217738 |                |    |             | -0.00164464  | 2177 |
| Hemoglobin.resultn | >= | 12.35       | ALK.times.uln      | >= | 5.391217738 |                |    |             | 0            | 2177 |
| age.yrs            | =  | Missing     |                    |    |             |                |    | Missing     | -0.00125966  | 2178 |
| age.yrs            | <  | 69.84257358 | psc.yrs.dur        | =  | Missing     |                |    | Missing     | -0.001379373 | 2178 |
| age.yrs            | <  | 69.84257358 | psc.yrs.dur        | <  | 2.366872005 |                |    | Missing     | -0.001701268 | 2178 |
| age.yrs            | <  | 69.84257358 | psc.yrs.dur        | >= | 2.366872005 | TBILL.resultn  | =  | Missing     | -0.000798482 | 2178 |
| age.yrs            | <  | 69.84257358 | psc.yrs.dur        | >= | 2.366872005 | TBILL.resultn  | <  | 2.15        | -0.000907863 | 2178 |
| age.yrs            | <  | 69.84257358 | psc.yrs.dur        | >= | 2.366872005 | TBILL.resultn  | >= | 2.15        | 0            | 2178 |
| age.yrs            | >= | 69.84257358 |                    |    |             |                |    | Missing     | 0.001661346  | 2178 |
| Hemoglobin.resultn | =  | Missing     |                    |    |             |                |    | Missing     | -0.000190845 | 2179 |
| Hemoglobin.resultn | <  | 12.15       |                    |    |             |                |    | Missing     | -0.000775886 | 2179 |
| Hemoglobin.resultn | >= | 12.15       | ALK.times.uln      | =  | Missing     |                |    | Missing     | -0.001263167 | 2179 |
| Hemoglobin.resultn | >= | 12.15       | ALK.times.uln      | <  | 2.822501299 |                |    | Missing     | -0.000771748 | 2179 |
| Hemoglobin.resultn | >= | 12.15       | ALK.times.uln      | >= | 2.822501299 | Sodium.resultn | =  | Missing     | 0            | 2179 |

|                    |    |             |                    |    |             |                |         |             |              |      |
|--------------------|----|-------------|--------------------|----|-------------|----------------|---------|-------------|--------------|------|
| Hemoglobin.resultn | >= | 12.15       | ALK.times.uln      | >= | 2.822501299 | Sodium.resultn | <       | 138.5       | 0.003181578  | 2179 |
| Hemoglobin.resultn | >= | 12.15       | ALK.times.uln      | >= | 2.822501299 | Sodium.resultn | >=      | 138.5       | -0.000267687 | 2179 |
| psc.yrs.dur        | =  | Missing     |                    |    |             |                |         |             | -0.000330228 | 2180 |
| psc.yrs.dur        | <  | 6.379192334 | TBILL.resultn      | =  | Missing     |                |         |             | 0            | 2180 |
| psc.yrs.dur        | <  | 6.379192334 | TBILL.resultn      | <  | 1.55        |                |         |             | -0.000356004 | 2180 |
| psc.yrs.dur        | <  | 6.379192334 | TBILL.resultn      | >= | 1.55        |                |         |             | -0.000861483 | 2180 |
| psc.yrs.dur        | >= | 6.379192334 | AST.resultn        | =  | Missing     |                |         |             | 0.000166876  | 2180 |
| psc.yrs.dur        | >= | 6.379192334 | AST.resultn        | <  | 43          |                |         |             | -0.001252871 | 2180 |
| psc.yrs.dur        | >= | 6.379192334 | AST.resultn        | >= | 43          |                |         |             | 0.001670138  | 2180 |
| age.yrs            | =  | Missing     |                    |    |             |                | Missing |             | 0.000917207  | 2181 |
| age.yrs            | <  | 69.76043806 | Hemoglobin.resultn | =  | Missing     |                | Missing |             | 0.001050453  | 2181 |
| age.yrs            | <  | 69.76043806 | Hemoglobin.resultn | <  | 11.85       |                | Missing |             | 0.00041943   | 2181 |
| age.yrs            | <  | 69.76043806 | Hemoglobin.resultn | >= | 11.85       | ALK.times.uln  | =       | Missing     | 0            | 2181 |
| age.yrs            | <  | 69.76043806 | Hemoglobin.resultn | >= | 11.85       | ALK.times.uln  | <       | 5.412513212 | 0.000670581  | 2181 |
| age.yrs            | <  | 69.76043806 | Hemoglobin.resultn | >= | 11.85       | ALK.times.uln  | >=      | 5.412513212 | 0.001942372  | 2181 |
| age.yrs            | >= | 69.76043806 |                    |    |             |                | Missing |             | 0.003688787  | 2181 |
| ALK.times.uln      | =  | Missing     | TBILL.resultn      | =  | Missing     |                |         |             | 0.000122156  | 2182 |
| ALK.times.uln      | =  | Missing     | TBILL.resultn      | <  | 1.31        |                |         |             | 0.000867686  | 2182 |
| ALK.times.uln      | =  | Missing     | TBILL.resultn      | >= | 1.31        |                |         |             | 0.003219955  | 2182 |
| ALK.times.uln      | <  | 6.02        | ALB.resultn        | =  | Missing     |                |         |             | 0            | 2182 |
| ALK.times.uln      | <  | 6.02        | ALB.resultn        | <  | 3.235       |                |         |             | -7.00E-05    | 2182 |
| ALK.times.uln      | <  | 6.02        | ALB.resultn        | >= | 3.235       |                |         |             | 0.000540198  | 2182 |
| ALK.times.uln      | >= | 6.02        |                    |    |             |                |         |             | 0.001950669  | 2182 |
| TBILL.resultn      | =  | Missing     |                    |    |             |                | Missing |             | 0.001588114  | 2183 |
| TBILL.resultn      | <  | 0.95        |                    |    |             |                | Missing |             | -1.01E-06    | 2183 |
| TBILL.resultn      | >= | 0.95        | Hemoglobin.resultn | =  | Missing     |                | Missing |             | 0.003480758  | 2183 |
| TBILL.resultn      | >= | 0.95        | Hemoglobin.resultn | <  | 13.35       | PLT.resultn    | =       | Missing     | 0.000710287  | 2183 |
| TBILL.resultn      | >= | 0.95        | Hemoglobin.resultn | <  | 13.35       | PLT.resultn    | <       | 249.5       | 0.001808004  | 2183 |
| TBILL.resultn      | >= | 0.95        | Hemoglobin.resultn | <  | 13.35       | PLT.resultn    | >=      | 249.5       | 0            | 2183 |
| TBILL.resultn      | >= | 0.95        | Hemoglobin.resultn | >= | 13.35       |                | Missing |             | 0.000393807  | 2183 |
| Sodium.resultn     | =  | Missing     |                    |    |             |                | Missing |             | -0.000569572 | 2184 |
| Sodium.resultn     | <  | 136.5       |                    |    |             |                | Missing |             | 0.001731402  | 2184 |
| Sodium.resultn     | >= | 136.5       | ALB.resultn        | =  | Missing     |                | Missing |             | -9.54E-05    | 2184 |
| Sodium.resultn     | >= | 136.5       | ALB.resultn        | <  | 3.62        | PLT.resultn    | =       | Missing     | 0.00093603   | 2184 |
| Sodium.resultn     | >= | 136.5       | ALB.resultn        | <  | 3.62        | PLT.resultn    | <       | 251         | 0.002808091  | 2184 |
| Sodium.resultn     | >= | 136.5       | ALB.resultn        | <  | 3.62        | PLT.resultn    | >=      | 251         | 0            | 2184 |
| Sodium.resultn     | >= | 136.5       | ALB.resultn        | >= | 3.62        |                | Missing |             | -0.000405843 | 2184 |
| AST.resultn        | =  | Missing     |                    |    |             |                | Missing |             | -0.000740493 | 2185 |
| AST.resultn        | <  | 211.5       | ALB.resultn        | =  | Missing     |                | Missing |             | 0.001274508  | 2185 |
| AST.resultn        | <  | 211.5       | ALB.resultn        | <  | 3.27        |                | Missing |             | -0.001088257 | 2185 |
| AST.resultn        | <  | 211.5       | ALB.resultn        | >= | 3.27        | ALK.times.uln  | =       | Missing     | 0            | 2185 |
| AST.resultn        | <  | 211.5       | ALB.resultn        | >= | 3.27        | ALK.times.uln  | <       | 5.537493479 | -0.001203939 | 2185 |
| AST.resultn        | <  | 211.5       | ALB.resultn        | >= | 3.27        | ALK.times.uln  | >=      | 5.537493479 | -0.00176999  | 2185 |
| AST.resultn        | >= | 211.5       |                    |    |             |                | Missing |             | 0.000736563  | 2185 |
| age.yrs            | =  | Missing     |                    |    |             |                |         |             | -0.000612522 | 2186 |
| age.yrs            | <  | 60.37919233 | Hemoglobin.resultn | =  | Missing     |                |         |             | 0            | 2186 |
| age.yrs            | <  | 60.37919233 | Hemoglobin.resultn | <  | 11.35       |                |         |             | -0.001004335 | 2186 |
| age.yrs            | <  | 60.37919233 | Hemoglobin.resultn | >= | 11.35       |                |         |             | -0.000838527 | 2186 |
| age.yrs            | >= | 60.37919233 | AST.resultn        | =  | Missing     |                |         |             | -0.00034848  | 2186 |
| age.yrs            | >= | 60.37919233 | AST.resultn        | <  | 49.5        |                |         |             | -0.001481925 | 2186 |
| age.yrs            | >= | 60.37919233 | AST.resultn        | >= | 49.5        |                |         |             | 0.001068326  | 2186 |
| Hemoglobin.resultn | =  | Missing     | TBILL.resultn      | =  | Missing     |                |         |             | -0.001566908 | 2187 |
| Hemoglobin.resultn | =  | Missing     | TBILL.resultn      | <  | 1.15        |                |         |             | -0.002214109 | 2187 |
| Hemoglobin.resultn | =  | Missing     | TBILL.resultn      | >= | 1.15        |                |         |             | 0            | 2187 |
| Hemoglobin.resultn | <  | 10.8        |                    |    |             |                |         |             | 0.000191532  | 2187 |
| Hemoglobin.resultn | >= | 10.8        | ALB.resultn        | =  | Missing     |                |         |             | 0.000273249  | 2187 |
| Hemoglobin.resultn | >= | 10.8        | ALB.resultn        | <  | 3.165       |                |         |             | -0.002313376 | 2187 |
| Hemoglobin.resultn | >= | 10.8        | ALB.resultn        | >= | 3.165       |                |         |             | -0.002058152 | 2187 |
| TBILL.resultn      | =  | Missing     |                    |    |             |                |         |             | -0.001041844 | 2188 |
| TBILL.resultn      | <  | 2.05        | ALK.times.uln      | =  | Missing     |                |         |             | 0            | 2188 |
| TBILL.resultn      | <  | 2.05        | ALK.times.uln      | <  | 5.963877551 |                |         |             | -0.000829756 | 2188 |
| TBILL.resultn      | <  | 2.05        | ALK.times.uln      | >= | 5.963877551 |                |         |             | 0.001002315  | 2188 |



|                |    |             |               |    |             |               |         |              |              |      |
|----------------|----|-------------|---------------|----|-------------|---------------|---------|--------------|--------------|------|
| TBILL.resultn  | >= | 2.05        | AST.resultn   | =  | Missing     |               |         | 0.00091229   | 2188         |      |
| TBILL.resultn  | >= | 2.05        | AST.resultn   | <  | 120         |               |         | 0.0016437    | 2188         |      |
| TBILL.resultn  | >= | 2.05        | AST.resultn   | >= | 120         |               |         | -0.000111684 | 2188         |      |
| AST.resultn    | =  | Missing     |               |    |             | Missing       |         | -0.000183554 | 2189         |      |
| AST.resultn    | <  | 141.5       | psc.yrs.dur   | =  | Missing     | Missing       |         | -0.000128356 | 2189         |      |
| AST.resultn    | <  | 141.5       | psc.yrs.dur   | <  | 1.336071184 | Missing       |         | -0.000438861 | 2189         |      |
| AST.resultn    | <  | 141.5       | psc.yrs.dur   | >= | 1.336071184 | ALK.times.uln | =       | Missing      | 0            | 2189 |
| AST.resultn    | <  | 141.5       | psc.yrs.dur   | >= | 1.336071184 | ALK.times.uln | <       | 2.731526287  | 0.000482883  | 2189 |
| AST.resultn    | <  | 141.5       | psc.yrs.dur   | >= | 1.336071184 | ALK.times.uln | >=      | 2.731526287  | 0.000878881  | 2189 |
| AST.resultn    | >= | 141.5       |               |    |             | Missing       |         | -0.000671501 | 2189         |      |
| age.yrs        | =  | Missing     |               |    |             | Missing       |         | 0.001085552  | 2190         |      |
| age.yrs        | <  | 70.76659822 | TBILL.resultn | =  | Missing     | Missing       |         | 0.002861235  | 2190         |      |
| age.yrs        | <  | 70.76659822 | TBILL.resultn | <  | 2.75        | PLT.resultn   | =       | Missing      | 0            | 2190 |
| age.yrs        | <  | 70.76659822 | TBILL.resultn | <  | 2.75        | PLT.resultn   | <       | 209.5        | 0.001996547  | 2190 |
| age.yrs        | <  | 70.76659822 | TBILL.resultn | <  | 2.75        | PLT.resultn   | >=      | 209.5        | 0.00066288   | 2190 |
| age.yrs        | <  | 70.76659822 | TBILL.resultn | >= | 2.75        |               | Missing | 0.000765269  | 2190         |      |
| age.yrs        | >= | 70.76659822 |               |    |             | Missing       |         | 0.004270357  | 2190         |      |
| age.yrs        | =  | Missing     |               |    |             | Missing       |         | -0.000912558 | 2191         |      |
| age.yrs        | <  | 69.76043806 | ALK.times.uln | =  | Missing     | Missing       |         | -0.00049081  | 2191         |      |
| age.yrs        | <  | 69.76043806 | ALK.times.uln | <  | 6.338830603 | TBILL.resultn | =       | Missing      | -0.001224607 | 2191 |
| age.yrs        | <  | 69.76043806 | ALK.times.uln | <  | 6.338830603 | TBILL.resultn | <       | 1.35         | -0.001494741 | 2191 |
| age.yrs        | <  | 69.76043806 | ALK.times.uln | <  | 6.338830603 | TBILL.resultn | >=      | 1.35         | 0            | 2191 |
| age.yrs        | <  | 69.76043806 | ALK.times.uln | >= | 6.338830603 |               | Missing | -0.001352323 | 2191         |      |
| age.yrs        | >= | 69.76043806 |               |    |             | Missing       |         | 0.001307227  | 2191         |      |
| Sodium.resultn | =  | Missing     |               |    |             |               |         | 0.00034038   | 2192         |      |
| Sodium.resultn | <  | 137.5       | AST.resultn   | =  | Missing     |               |         | 0.001517136  | 2192         |      |
| Sodium.resultn | <  | 137.5       | AST.resultn   | <  | 65.5        |               |         | 0.002872445  | 2192         |      |
| Sodium.resultn | <  | 137.5       | AST.resultn   | >= | 65.5        |               |         | -4.67E-05    | 2192         |      |
| Sodium.resultn | >= | 137.5       | PLT.resultn   | =  | Missing     |               |         | 0.000158057  | 2192         |      |
| Sodium.resultn | >= | 137.5       | PLT.resultn   | <  | 185.5       |               |         | 0.001839213  | 2192         |      |
| Sodium.resultn | >= | 137.5       | PLT.resultn   | >= | 185.5       |               |         | 0            | 2192         |      |
| psc.yrs.dur    | =  | Missing     |               |    |             | Missing       |         | -9.74E-05    | 2193         |      |
| psc.yrs.dur    | <  | 7.80971937  | ALK.times.uln | =  | Missing     | Missing       |         | -0.000228659 | 2193         |      |
| psc.yrs.dur    | <  | 7.80971937  | ALK.times.uln | <  | 3.336440678 |               |         | -0.00056454  | 2193         |      |
| psc.yrs.dur    | <  | 7.80971937  | ALK.times.uln | >= | 3.336440678 | PLT.resultn   | =       | Missing      | 0.000451704  | 2193 |
| psc.yrs.dur    | <  | 7.80971937  | ALK.times.uln | >= | 3.336440678 | PLT.resultn   | <       | 249.5        | 0.001242187  | 2193 |
| psc.yrs.dur    | <  | 7.80971937  | ALK.times.uln | >= | 3.336440678 | PLT.resultn   | >=      | 249.5        | 0            | 2193 |
| psc.yrs.dur    | >= | 7.80971937  |               |    |             | Missing       |         | 0.002176624  | 2193         |      |
| TBILL.resultn  | =  | Missing     |               |    |             | Missing       |         | -0.000378746 | 2194         |      |
| TBILL.resultn  | <  | 4.5         | ALK.times.uln | =  | Missing     | TBILL.resultn | =       | Missing      | -0.001465437 | 2194 |
| TBILL.resultn  | <  | 4.5         | ALK.times.uln | =  | Missing     | TBILL.resultn | <       | 0.75         | -0.002686635 | 2194 |
| TBILL.resultn  | <  | 4.5         | ALK.times.uln | =  | Missing     | TBILL.resultn | >=      | 0.75         | 0            | 2194 |
| TBILL.resultn  | <  | 4.5         | ALK.times.uln | <  | 3.920665165 |               | Missing | -0.001768161 | 2194         |      |
| TBILL.resultn  | <  | 4.5         | ALK.times.uln | >= | 3.920665165 |               | Missing | -0.002156762 | 2194         |      |
| TBILL.resultn  | >= | 4.5         |               |    |             | Missing       |         | -0.002207165 | 2194         |      |
| psc.yrs.dur    | =  | Missing     |               |    |             | Missing       |         | 0.000621766  | 2195         |      |
| psc.yrs.dur    | <  | 2.043805613 |               |    |             | Missing       |         | 0.000270458  | 2195         |      |
| psc.yrs.dur    | >= | 2.043805613 | ALB.resultn   | =  | Missing     | Missing       |         | 0.001563681  | 2195         |      |
| psc.yrs.dur    | >= | 2.043805613 | ALB.resultn   | <  | 3.35        |               | Missing | 0.001902916  | 2195         |      |
| psc.yrs.dur    | >= | 2.043805613 | ALB.resultn   | >= | 3.35        | TBILL.resultn | =       | Missing      | 0.001490513  | 2195 |
| psc.yrs.dur    | >= | 2.043805613 | ALB.resultn   | >= | 3.35        | TBILL.resultn | <       | 1.15         | 0.002714863  | 2195 |
| psc.yrs.dur    | >= | 2.043805613 | ALB.resultn   | >= | 3.35        | TBILL.resultn | >=      | 1.15         | 0            | 2195 |
| ALB.resultn    | =  | Missing     |               |    |             | Missing       |         | -0.002761078 | 2196         |      |
| ALB.resultn    | <  | 3.135       |               |    |             | Missing       |         | -0.003464948 | 2196         |      |
| ALB.resultn    | >= | 3.135       | psc.yrs.dur   | =  | Missing     | Missing       |         | -0.00312266  | 2196         |      |
| ALB.resultn    | >= | 3.135       | psc.yrs.dur   | <  | 6.410677618 |               | Missing | -0.003277691 | 2196         |      |
| ALB.resultn    | >= | 3.135       | psc.yrs.dur   | >= | 6.410677618 | AST.resultn   | =       | Missing      | -0.002037441 | 2196 |
| ALB.resultn    | >= | 3.135       | psc.yrs.dur   | >= | 6.410677618 | AST.resultn   | <       | 44.5         | -0.004074881 | 2196 |
| ALB.resultn    | >= | 3.135       | psc.yrs.dur   | >= | 6.410677618 | AST.resultn   | >=      | 44.5         | 0            | 2196 |
| ALK.times.uln  | =  | Missing     |               |    |             | Missing       |         | 0.000644953  | 2197         |      |
| ALK.times.uln  | <  | 5.462893197 | PLT.resultn   | =  | Missing     | Missing       |         | 0.001960753  | 2197         |      |
| ALK.times.uln  | <  | 5.462893197 | PLT.resultn   | <  | 186.5       | Missing       |         | 0.002429305  | 2197         |      |

|                    |    |             |                |    |             |                |    |             |              |   |      |
|--------------------|----|-------------|----------------|----|-------------|----------------|----|-------------|--------------|---|------|
| ALK.times.uln      | <  | 5.462893197 | PLT.resultn    | >= | 186.5       | ALB.resultn    | =  | Missing     |              | 0 | 2197 |
| ALK.times.uln      | <  | 5.462893197 | PLT.resultn    | >= | 186.5       | ALB.resultn    | <  | 3.23        | -2.00E-05    |   | 2197 |
| ALK.times.uln      | <  | 5.462893197 | PLT.resultn    | >= | 186.5       | ALB.resultn    | >= | 3.23        | 0.000713686  |   | 2197 |
| ALK.times.uln      | >= | 5.462893197 |                |    |             |                |    | Missing     | 0.001735926  |   | 2197 |
| TBILL.resultn      | =  | Missing     |                |    |             |                |    | Missing     | -0.001192676 |   | 2198 |
| TBILL.resultn      | <  | 4.2         | ALB.resultn    | =  | Missing     |                |    | Missing     | -0.0026982   |   | 2198 |
| TBILL.resultn      | <  | 4.2         | ALB.resultn    | <  | 3.465       |                |    | Missing     | -0.002140873 |   | 2198 |
| TBILL.resultn      | <  | 4.2         | ALB.resultn    | >= | 3.465       | age.yrs        | =  | Missing     | -0.001638008 |   | 2198 |
| TBILL.resultn      | <  | 4.2         | ALB.resultn    | >= | 3.465       | age.yrs        | <  | 56.10403833 | -0.002055755 |   | 2198 |
| TBILL.resultn      | <  | 4.2         | ALB.resultn    | >= | 3.465       | age.yrs        | >= | 56.10403833 | 0            |   | 2198 |
| TBILL.resultn      | >= | 4.2         |                |    |             |                |    | Missing     | -0.000599867 |   | 2198 |
| ALK.times.uln      | =  | Missing     |                |    |             |                |    | Missing     | -0.000760599 |   | 2199 |
| ALK.times.uln      | <  | 6.068877551 | TBILL.resultn  | =  | Missing     |                |    | Missing     | -0.000981735 |   | 2199 |
| ALK.times.uln      | <  | 6.068877551 | TBILL.resultn  | <  | 0.85        |                |    | Missing     | -0.001447973 |   | 2199 |
| ALK.times.uln      | <  | 6.068877551 | TBILL.resultn  | >= | 0.85        | Sodium.resultn | =  | Missing     | 0            |   | 2199 |
| ALK.times.uln      | <  | 6.068877551 | TBILL.resultn  | >= | 0.85        | Sodium.resultn | <  | 138.5       | 0.001146863  |   | 2199 |
| ALK.times.uln      | <  | 6.068877551 | TBILL.resultn  | >= | 0.85        | Sodium.resultn | >= | 138.5       | -0.001445703 |   | 2199 |
| ALK.times.uln      | >= | 6.068877551 |                |    |             |                |    | Missing     | 0.001329531  |   | 2199 |
| psc.yrs.dur        | =  | Missing     |                |    |             |                |    |             | -0.000144982 |   | 2200 |
| psc.yrs.dur        | <  | 6.410677618 | ALB.resultn    | =  | Missing     |                |    |             | 0            |   | 2200 |
| psc.yrs.dur        | <  | 6.410677618 | ALB.resultn    | <  | 3.27        |                |    |             | -0.001271252 |   | 2200 |
| psc.yrs.dur        | <  | 6.410677618 | ALB.resultn    | >= | 3.27        |                |    |             | -0.000616726 |   | 2200 |
| psc.yrs.dur        | >= | 6.410677618 | PLT.resultn    | =  | Missing     |                |    |             | 0.002189406  |   | 2200 |
| psc.yrs.dur        | >= | 6.410677618 | PLT.resultn    | <  | 243.5       |                |    |             | -0.000497148 |   | 2200 |
| psc.yrs.dur        | >= | 6.410677618 | PLT.resultn    | >= | 243.5       |                |    |             | 0.005643547  |   | 2200 |
| Hemoglobin.resultn | =  | Missing     | ALB.resultn    | =  | Missing     |                |    |             | 4.68E-05     |   | 2201 |
| Hemoglobin.resultn | =  | Missing     | ALB.resultn    | <  | 3.95        |                |    |             | 0.00198766   |   | 2201 |
| Hemoglobin.resultn | =  | Missing     | ALB.resultn    | >= | 3.95        |                |    |             | 1.64E-05     |   | 2201 |
| Hemoglobin.resultn | <  | 13.15       |                |    |             |                |    |             | 0.000608353  |   | 2201 |
| Hemoglobin.resultn | >= | 13.15       | Sodium.resultn | =  | Missing     |                |    |             | 0            |   | 2201 |
| Hemoglobin.resultn | >= | 13.15       | Sodium.resultn | <  | 138.5       |                |    |             | 0.004099315  |   | 2201 |
| Hemoglobin.resultn | >= | 13.15       | Sodium.resultn | >= | 138.5       |                |    |             | 0.001103181  |   | 2201 |
| psc.yrs.dur        | =  | Missing     |                |    |             |                |    | Missing     | 0.000298142  |   | 2202 |
| psc.yrs.dur        | <  | 10.04654346 | psc.yrs.dur    | =  | Missing     |                |    | Missing     | 0.000342431  |   | 2202 |
| psc.yrs.dur        | <  | 10.04654346 | psc.yrs.dur    | <  | 6.324435318 | PLT.resultn    | =  | Missing     | 0            |   | 2202 |
| psc.yrs.dur        | <  | 10.04654346 | psc.yrs.dur    | <  | 6.324435318 | PLT.resultn    | <  | 173         | 0.002409209  |   | 2202 |
| psc.yrs.dur        | <  | 10.04654346 | psc.yrs.dur    | <  | 6.324435318 | PLT.resultn    | >= | 173         | 5.73E-05     |   | 2202 |
| psc.yrs.dur        | <  | 10.04654346 | psc.yrs.dur    | >= | 6.324435318 |                |    | Missing     | 0.003339011  |   | 2202 |
| psc.yrs.dur        | >= | 10.04654346 |                |    |             |                |    | Missing     | -0.000360668 |   | 2202 |
| ALK.times.uln      | =  | Missing     |                |    |             |                |    |             | -0.000491047 |   | 2203 |
| ALK.times.uln      | <  | 5.462893197 | age.yrs        | =  | Missing     |                |    |             | -0.000200349 |   | 2203 |
| ALK.times.uln      | <  | 5.462893197 | age.yrs        | <  | 68.50102669 |                |    |             | -0.000569887 |   | 2203 |
| ALK.times.uln      | <  | 5.462893197 | age.yrs        | >= | 68.50102669 |                |    |             | 0.005675303  |   | 2203 |
| ALK.times.uln      | >= | 5.462893197 | AST.resultn    | =  | Missing     |                |    |             | 0.000630744  |   | 2203 |
| ALK.times.uln      | >= | 5.462893197 | AST.resultn    | <  | 112.5       |                |    |             | 0.001261488  |   | 2203 |
| ALK.times.uln      | >= | 5.462893197 | AST.resultn    | >= | 112.5       |                |    |             | 0            |   | 2203 |
| PLT.resultn        | =  | Missing     |                |    |             |                |    |             | -1.76E-05    |   | 2204 |
| PLT.resultn        | <  | 209.5       | ALB.resultn    | =  | Missing     |                |    |             | 0.001586155  |   | 2204 |
| PLT.resultn        | <  | 209.5       | ALB.resultn    | <  | 3.635       |                |    |             | 0.002946858  |   | 2204 |
| PLT.resultn        | <  | 209.5       | ALB.resultn    | >= | 3.635       |                |    |             | 0.001116948  |   | 2204 |
| PLT.resultn        | >= | 209.5       | ALK.times.uln  | =  | Missing     |                |    |             | 0            |   | 2204 |
| PLT.resultn        | >= | 209.5       | ALK.times.uln  | <  | 6.02173913  |                |    |             | 0.000237302  |   | 2204 |
| PLT.resultn        | >= | 209.5       | ALK.times.uln  | >= | 6.02173913  |                |    |             | 0.002159339  |   | 2204 |
| TBILL.resultn      | =  | Missing     |                |    |             |                |    | Missing     | 0.001354191  |   | 2205 |
| TBILL.resultn      | <  | 3.8         | TBILL.resultn  | =  | Missing     |                |    | Missing     | -0.000128157 |   | 2205 |
| TBILL.resultn      | <  | 3.8         | TBILL.resultn  | <  | 2.05        | ALK.times.uln  | =  | Missing     | 0            |   | 2205 |
| TBILL.resultn      | <  | 3.8         | TBILL.resultn  | <  | 2.05        | ALK.times.uln  | <  | 5.963877551 | -0.000376937 |   | 2205 |
| TBILL.resultn      | <  | 3.8         | TBILL.resultn  | <  | 2.05        | ALK.times.uln  | >= | 5.963877551 | 0.000926768  |   | 2205 |
| TBILL.resultn      | <  | 3.8         | TBILL.resultn  | >= | 2.05        |                |    | Missing     | 0.001367943  |   | 2205 |
| TBILL.resultn      | >= | 3.8         |                |    |             |                |    | Missing     | -0.000491932 |   | 2205 |
| TBILL.resultn      | =  | Missing     |                |    |             |                |    | Missing     | -0.002296665 |   | 2206 |
| TBILL.resultn      | <  | 3.25        | Sodium.resultn | =  | Missing     |                |    | Missing     | -0.004343275 |   | 2206 |

|                |    |             |                |    |             |                    |    |             |              |      |
|----------------|----|-------------|----------------|----|-------------|--------------------|----|-------------|--------------|------|
| TBILL.resultn  | <  | 3.25        | Sodium.resultn | <  | 138.5       | Hemoglobin.resultn | =  | Missing     | -0.001531048 | 2206 |
| TBILL.resultn  | <  | 3.25        | Sodium.resultn | <  | 138.5       | Hemoglobin.resultn | <  | 13.25       | -0.003886506 | 2206 |
| TBILL.resultn  | <  | 3.25        | Sodium.resultn | <  | 138.5       | Hemoglobin.resultn | >= | 13.25       | 0            | 2206 |
| TBILL.resultn  | <  | 3.25        | Sodium.resultn | >= | 138.5       |                    |    | Missing     | -0.004318777 | 2206 |
| TBILL.resultn  | >= | 3.25        |                |    |             |                    |    | Missing     | -0.003073489 | 2206 |
| ALK.times.uln  | =  | Missing     | psc.yrs.dur    | =  | Missing     |                    |    |             | -0.001419569 | 2207 |
| ALK.times.uln  | =  | Missing     | psc.yrs.dur    | <  | 6.410677618 |                    |    |             | -0.002018943 | 2207 |
| ALK.times.uln  | =  | Missing     | psc.yrs.dur    | >= | 6.410677618 |                    |    |             | 0            | 2207 |
| ALK.times.uln  | <  | 7.72173913  | ALK.times.uln  | =  | Missing     |                    |    |             | -0.001709892 | 2207 |
| ALK.times.uln  | <  | 7.72173913  | ALK.times.uln  | <  | 5.446215139 |                    |    |             | -0.001779568 | 2207 |
| ALK.times.uln  | <  | 7.72173913  | ALK.times.uln  | >= | 5.446215139 |                    |    |             | -0.000639417 | 2207 |
| ALK.times.uln  | >= | 7.72173913  |                |    |             |                    |    |             | -0.002092683 | 2207 |
| psc.yrs.dur    | =  | Missing     |                |    |             |                    |    | Missing     | 0.000162845  | 2208 |
| psc.yrs.dur    | <  | 1.916495551 |                |    |             |                    |    | Missing     | -0.000139153 | 2208 |
| psc.yrs.dur    | >= | 1.916495551 | AST.resultn    | =  | Missing     |                    |    | Missing     | 0.000819693  | 2208 |
| psc.yrs.dur    | >= | 1.916495551 | AST.resultn    | <  | 86.5        | psc.yrs.dur        | =  | Missing     | 0.000500694  | 2208 |
| psc.yrs.dur    | >= | 1.916495551 | AST.resultn    | <  | 86.5        | psc.yrs.dur        | <  | 3.026694045 | 0.002853955  | 2208 |
| psc.yrs.dur    | >= | 1.916495551 | AST.resultn    | <  | 86.5        | psc.yrs.dur        | >= | 3.026694045 | 0            | 2208 |
| psc.yrs.dur    | >= | 1.916495551 | AST.resultn    | >= | 86.5        |                    |    | Missing     | 0.001829857  | 2208 |
| TBILL.resultn  | =  | Missing     |                |    |             |                    |    |             | 0.001505993  | 2209 |
| TBILL.resultn  | <  | 1.65        | Sodium.resultn | =  | Missing     |                    |    |             | 0            | 2209 |
| TBILL.resultn  | <  | 1.65        | Sodium.resultn | <  | 142.5       |                    |    |             | 0.000249005  | 2209 |
| TBILL.resultn  | <  | 1.65        | Sodium.resultn | >= | 142.5       |                    |    |             | 0.003775366  | 2209 |
| TBILL.resultn  | >= | 1.65        | PLT.resultn    | =  | Missing     |                    |    |             | 0.001473985  | 2209 |
| TBILL.resultn  | >= | 1.65        | PLT.resultn    | <  | 222         |                    |    |             | 0.003117564  | 2209 |
| TBILL.resultn  | >= | 1.65        | PLT.resultn    | >= | 222         |                    |    |             | 0.000691328  | 2209 |
| age.yrs        | =  | Missing     |                |    |             |                    |    |             | 0.000817967  | 2210 |
| age.yrs        | <  | 62.47091034 | ALB.resultn    | =  | Missing     |                    |    |             | 0            | 2210 |
| age.yrs        | <  | 62.47091034 | ALB.resultn    | <  | 3.03        |                    |    |             | 0.001790138  | 2210 |
| age.yrs        | <  | 62.47091034 | ALB.resultn    | >= | 3.03        |                    |    |             | 0.000728016  | 2210 |
| age.yrs        | >= | 62.47091034 | ALB.resultn    | =  | Missing     |                    |    |             | 0.001691719  | 2210 |
| age.yrs        | >= | 62.47091034 | ALB.resultn    | <  | 3.95        |                    |    |             | 0.00348905   | 2210 |
| age.yrs        | >= | 62.47091034 | ALB.resultn    | >= | 3.95        |                    |    |             | 3.26E-05     | 2210 |
| ALK.times.uln  | =  | Missing     | PLT.resultn    | =  | Missing     |                    |    |             | 0            | 2211 |
| ALK.times.uln  | =  | Missing     | PLT.resultn    | <  | 231.5       |                    |    |             | -0.00066804  | 2211 |
| ALK.times.uln  | =  | Missing     | PLT.resultn    | >= | 231.5       |                    |    |             | 0.001264861  | 2211 |
| ALK.times.uln  | <  | 5.438574341 |                |    |             |                    |    |             | -0.000459922 | 2211 |
| ALK.times.uln  | >= | 5.438574341 | AST.resultn    | =  | Missing     |                    |    |             | 0.000972737  | 2211 |
| ALK.times.uln  | >= | 5.438574341 | AST.resultn    | <  | 114.5       |                    |    |             | 0.002251112  | 2211 |
| ALK.times.uln  | >= | 5.438574341 | AST.resultn    | >= | 114.5       |                    |    |             | -0.000108964 | 2211 |
| psc.yrs.dur    | =  | Missing     |                |    |             |                    |    |             | 0.00061936   | 2212 |
| psc.yrs.dur    | <  | 6.410677618 | TBILL.resultn  | =  | Missing     |                    |    |             | 0.000477874  | 2212 |
| psc.yrs.dur    | <  | 6.410677618 | TBILL.resultn  | <  | 3.05        |                    |    |             | 0.000501531  | 2212 |
| psc.yrs.dur    | <  | 6.410677618 | TBILL.resultn  | >= | 3.05        |                    |    |             | 0            | 2212 |
| psc.yrs.dur    | >= | 6.410677618 | psc.yrs.dur    | =  | Missing     |                    |    |             | 0.001534857  | 2212 |
| psc.yrs.dur    | >= | 6.410677618 | psc.yrs.dur    | <  | 8.262833676 |                    |    |             | 0.003230958  | 2212 |
| psc.yrs.dur    | >= | 6.410677618 | psc.yrs.dur    | >= | 8.262833676 |                    |    |             | 0.000347587  | 2212 |
| AST.resultn    | =  | Missing     |                |    |             |                    |    | Missing     | -0.00428451  | 2213 |
| AST.resultn    | <  | 52.5        |                |    |             |                    |    | Missing     | -0.005218021 | 2213 |
| AST.resultn    | >= | 52.5        | AST.resultn    | =  | Missing     |                    |    | Missing     | -0.003584377 | 2213 |
| AST.resultn    | >= | 52.5        | AST.resultn    | <  | 72.5        | TBILL.resultn      | =  | Missing     | -0.001921349 | 2213 |
| AST.resultn    | >= | 52.5        | AST.resultn    | <  | 72.5        | TBILL.resultn      | <  | 0.65        | -0.004449439 | 2213 |
| AST.resultn    | >= | 52.5        | AST.resultn    | <  | 72.5        | TBILL.resultn      | >= | 0.65        | 0            | 2213 |
| AST.resultn    | >= | 52.5        | AST.resultn    | >= | 72.5        |                    |    | Missing     | -0.004372127 | 2213 |
| ALK.times.uln  | =  | Missing     |                |    |             |                    |    | Missing     | 0.000666897  | 2214 |
| ALK.times.uln  | <  | 2.781086957 |                |    |             |                    |    | Missing     | -0.000354258 | 2214 |
| ALK.times.uln  | >= | 2.781086957 | AST.resultn    | =  | Missing     |                    |    | Missing     | 0.001162481  | 2214 |
| ALK.times.uln  | >= | 2.781086957 | AST.resultn    | <  | 64          |                    |    | Missing     | 0.003899333  | 2214 |
| ALK.times.uln  | >= | 2.781086957 | AST.resultn    | >= | 64          | PLT.resultn        | =  | Missing     | 0.00046371   | 2214 |
| ALK.times.uln  | >= | 2.781086957 | AST.resultn    | >= | 64          | PLT.resultn        | <  | 267.5       | 0.001200191  | 2214 |
| ALK.times.uln  | >= | 2.781086957 | AST.resultn    | >= | 64          | PLT.resultn        | >= | 267.5       | 0            | 2214 |
| Sodium.resultn | =  | Missing     |                |    |             |                    |    |             | 0.000356043  | 2215 |

|                    |    |             |                |    |             |                    |    |              |              |      |
|--------------------|----|-------------|----------------|----|-------------|--------------------|----|--------------|--------------|------|
| Sodium.resultn     | <  | 138.5       | ALK.times.uln  | =  | Missing     |                    |    | 0.001171413  | 2215         |      |
| Sodium.resultn     | <  | 138.5       | ALK.times.uln  | <  | 2.795652174 |                    |    | 0.000567516  | 2215         |      |
| Sodium.resultn     | <  | 138.5       | ALK.times.uln  | >= | 2.795652174 |                    |    | 0.00190951   | 2215         |      |
| Sodium.resultn     | >= | 138.5       | psc.yrs.dur    | =  | Missing     |                    |    | 0.000504766  | 2215         |      |
| Sodium.resultn     | >= | 138.5       | psc.yrs.dur    | <  | 10.25735797 |                    |    | 0.000555242  | 2215         |      |
| Sodium.resultn     | >= | 138.5       | psc.yrs.dur    | >= | 10.25735797 |                    |    | 0            | 2215         |      |
| TBILL.resultn      | =  | Missing     |                |    |             | Missing            |    | -0.000873967 | 2216         |      |
| TBILL.resultn      | <  | 3.75        | TBILL.resultn  | =  | Missing     | Missing            |    | -0.001453285 | 2216         |      |
| TBILL.resultn      | <  | 3.75        | TBILL.resultn  | <  | 0.85        | Missing            |    | -0.001998258 | 2216         |      |
| TBILL.resultn      | <  | 3.75        | TBILL.resultn  | >= | 0.85        | Hemoglobin.resultn | =  | Missing      | 0            | 2216 |
| TBILL.resultn      | <  | 3.75        | TBILL.resultn  | >= | 0.85        | Hemoglobin.resultn | <  | 13.75        | -0.000149049 | 2216 |
| TBILL.resultn      | <  | 3.75        | TBILL.resultn  | >= | 0.85        | Hemoglobin.resultn | >= | 13.75        | -0.001423877 | 2216 |
| TBILL.resultn      | >= | 3.75        |                |    |             | Missing            |    | -0.001860533 | 2216         |      |
| psc.yrs.dur        | =  | Missing     |                |    |             |                    |    | 1.98E-05     | 2217         |      |
| psc.yrs.dur        | <  | 6.324435318 | TBILL.resultn  | =  | Missing     |                    |    | 0            | 2217         |      |
| psc.yrs.dur        | <  | 6.324435318 | TBILL.resultn  | <  | 3           |                    |    | -5.31E-05    | 2217         |      |
| psc.yrs.dur        | <  | 6.324435318 | TBILL.resultn  | >= | 3           |                    |    | -0.000374212 | 2217         |      |
| psc.yrs.dur        | >= | 6.324435318 | AST.resultn    | =  | Missing     |                    |    | 0.000632876  | 2217         |      |
| psc.yrs.dur        | >= | 6.324435318 | AST.resultn    | <  | 70.5        |                    |    | 0.000235404  | 2217         |      |
| psc.yrs.dur        | >= | 6.324435318 | AST.resultn    | >= | 70.5        |                    |    | 0.00142782   | 2217         |      |
| ALK.times.uln      | =  | Missing     | TBILL.resultn  | =  | Missing     |                    |    | -0.00190098  | 2218         |      |
| ALK.times.uln      | =  | Missing     | TBILL.resultn  | <  | 0.95        |                    |    | -0.002738979 | 2218         |      |
| ALK.times.uln      | =  | Missing     | TBILL.resultn  | >= | 0.95        |                    |    | -0.000224981 | 2218         |      |
| ALK.times.uln      | <  | 7.868810472 | PLT.resultn    | =  | Missing     |                    |    | 0            | 2218         |      |
| ALK.times.uln      | <  | 7.868810472 | PLT.resultn    | <  | 183         |                    |    | -0.000676715 | 2218         |      |
| ALK.times.uln      | <  | 7.868810472 | PLT.resultn    | >= | 183         |                    |    | -0.002089559 | 2218         |      |
| ALK.times.uln      | >= | 7.868810472 |                |    |             |                    |    | -0.002148185 | 2218         |      |
| ALK.times.uln      | =  | Missing     | TBILL.resultn  | =  | Missing     |                    |    | 0            | 2219         |      |
| ALK.times.uln      | =  | Missing     | TBILL.resultn  | <  | 1.31        |                    |    | 0.00085511   | 2219         |      |
| ALK.times.uln      | =  | Missing     | TBILL.resultn  | >= | 1.31        |                    |    | 0.003304569  | 2219         |      |
| ALK.times.uln      | <  | 7.850310559 | TBILL.resultn  | =  | Missing     |                    |    | 0.000571404  | 2219         |      |
| ALK.times.uln      | <  | 7.850310559 | TBILL.resultn  | <  | 0.85        |                    |    | -3.02E-05    | 2219         |      |
| ALK.times.uln      | <  | 7.850310559 | TBILL.resultn  | >= | 0.85        |                    |    | 0.001277005  | 2219         |      |
| ALK.times.uln      | >= | 7.850310559 |                |    |             |                    |    | 0.000414365  | 2219         |      |
| PLT.resultn        | =  | Missing     |                |    |             | Missing            |    | -0.004457152 | 2220         |      |
| PLT.resultn        | <  | 249.5       | PLT.resultn    | =  | Missing     | Missing            |    | -0.003677278 | 2220         |      |
| PLT.resultn        | <  | 249.5       | PLT.resultn    | <  | 232.5       | Missing            |    | -0.004149305 | 2220         |      |
| PLT.resultn        | <  | 249.5       | PLT.resultn    | >= | 232.5       | age.yrs            | =  | Missing      | -0.002418537 | 2220 |
| PLT.resultn        | <  | 249.5       | PLT.resultn    | >= | 232.5       | age.yrs            | <  | 52.98288843  | -0.004081282 | 2220 |
| PLT.resultn        | <  | 249.5       | PLT.resultn    | >= | 232.5       | age.yrs            | >= | 52.98288843  | 0            | 2220 |
| PLT.resultn        | >= | 249.5       |                |    |             | Missing            |    | -0.004859387 | 2220         |      |
| Hemoglobin.resultn | =  | Missing     | ALB.resultn    | =  | Missing     |                    |    | -0.000843421 | 2221         |      |
| Hemoglobin.resultn | =  | Missing     | ALB.resultn    | <  | 3.95        |                    |    | 0.002189278  | 2221         |      |
| Hemoglobin.resultn | =  | Missing     | ALB.resultn    | >= | 3.95        |                    |    | -0.000190666 | 2221         |      |
| Hemoglobin.resultn | <  | 13.75       | TBILL.resultn  | =  | Missing     |                    |    | 0.000463669  | 2221         |      |
| Hemoglobin.resultn | <  | 13.75       | TBILL.resultn  | <  | 2.65        |                    |    | 0.000520913  | 2221         |      |
| Hemoglobin.resultn | <  | 13.75       | TBILL.resultn  | >= | 2.65        |                    |    | 0            | 2221         |      |
| Hemoglobin.resultn | >= | 13.75       |                |    |             |                    |    | -0.000883408 | 2221         |      |
| ALK.times.uln      | =  | Missing     | Sodium.resultn | =  | Missing     | Missing            |    | -0.000105834 | 2222         |      |
| ALK.times.uln      | =  | Missing     | Sodium.resultn | <  | 140.5       | ALB.resultn        | =  | Missing      | 0.001395967  | 2222 |
| ALK.times.uln      | =  | Missing     | Sodium.resultn | <  | 140.5       | ALB.resultn        | <  | 3.95         | 0.003629513  | 2222 |
| ALK.times.uln      | =  | Missing     | Sodium.resultn | <  | 140.5       | ALB.resultn        | >= | 3.95         | 0            | 2222 |
| ALK.times.uln      | =  | Missing     | Sodium.resultn | >= | 140.5       |                    |    | Missing      | 0.000352245  | 2222 |
| ALK.times.uln      | <  | 5.859702093 |                |    |             | Missing            |    | Missing      | 0.00067411   | 2222 |
| ALK.times.uln      | >= | 5.859702093 |                |    |             | Missing            |    | Missing      | 0.001410526  | 2222 |
| ALB.resultn        | =  | Missing     | psc.yrs.dur    | =  | Missing     |                    |    | 0.000898987  | 2223         |      |
| ALB.resultn        | =  | Missing     | psc.yrs.dur    | <  | 0.168377823 |                    |    | 0.002337366  | 2223         |      |
| ALB.resultn        | =  | Missing     | psc.yrs.dur    | >= | 0.168377823 |                    |    | 0            | 2223         |      |
| ALB.resultn        | <  | 2.915       |                |    |             |                    |    | 0.001687261  | 2223         |      |
| ALB.resultn        | >= | 2.915       | TBILL.resultn  | =  | Missing     |                    |    | 0.000700101  | 2223         |      |
| ALB.resultn        | >= | 2.915       | TBILL.resultn  | <  | 2.05        |                    |    | 0.000630269  | 2223         |      |
| ALB.resultn        | >= | 2.915       | TBILL.resultn  | >= | 2.05        |                    |    | 0.001568646  | 2223         |      |

|                    |    |             |                    |    |             |               |              |              |              |      |
|--------------------|----|-------------|--------------------|----|-------------|---------------|--------------|--------------|--------------|------|
| psc.yrs.dur        | =  | Missing     |                    |    |             | Missing       | -0.001081112 | 2224         |              |      |
| psc.yrs.dur        | <  | 14.25188227 | Hemoglobin.resultn | =  | Missing     | Missing       | -0.000431839 | 2224         |              |      |
| psc.yrs.dur        | <  | 14.25188227 | Hemoglobin.resultn | <  | 13.35       | TBILL.resultn | =            | Missing      | -0.00105734  | 2224 |
| psc.yrs.dur        | <  | 14.25188227 | Hemoglobin.resultn | <  | 13.35       | TBILL.resultn | <            | 1.05         | -0.001691744 | 2224 |
| psc.yrs.dur        | <  | 14.25188227 | Hemoglobin.resultn | <  | 13.35       | TBILL.resultn | >=           | 1.05         | 0            | 2224 |
| psc.yrs.dur        | <  | 14.25188227 | Hemoglobin.resultn | >= | 13.35       |               | Missing      | -0.001723323 | 2224         |      |
| psc.yrs.dur        | >= | 14.25188227 |                    |    |             | Missing       | 0.001798706  | 2224         |              |      |
| Sodium.resultn     | =  | Missing     |                    |    |             |               | 0.000280781  | 2225         |              |      |
| Sodium.resultn     | <  | 141.5       | ALB.resultn        | =  | Missing     |               | 0.000999437  | 2225         |              |      |
| Sodium.resultn     | <  | 141.5       | ALB.resultn        | <  | 3.31        |               | 0.002019991  | 2225         |              |      |
| Sodium.resultn     | <  | 141.5       | ALB.resultn        | >= | 3.31        |               | 0.000776558  | 2225         |              |      |
| Sodium.resultn     | >= | 141.5       | TBILL.resultn      | =  | Missing     |               | 0.000541633  | 2225         |              |      |
| Sodium.resultn     | >= | 141.5       | TBILL.resultn      | <  | 1.45        |               | 0.000677041  | 2225         |              |      |
| Sodium.resultn     | >= | 141.5       | TBILL.resultn      | >= | 1.45        |               | 0            | 2225         |              |      |
| ALB.resultn        | =  | Missing     |                    |    |             | Missing       | 1.17E-05     | 2226         |              |      |
| ALB.resultn        | <  | 3.05        |                    |    |             | Missing       | 0.002679216  | 2226         |              |      |
| ALB.resultn        | >= | 3.05        | TBILL.resultn      | =  | Missing     | Missing       | 0.0010904    | 2226         |              |      |
| ALB.resultn        | >= | 3.05        | TBILL.resultn      | <  | 2.75        | AST.resultn   | =            | Missing      | 0.001143122  | 2226 |
| ALB.resultn        | >= | 3.05        | TBILL.resultn      | <  | 2.75        | AST.resultn   | <            | 102          | 0.001463487  | 2226 |
| ALB.resultn        | >= | 3.05        | TBILL.resultn      | <  | 2.75        | AST.resultn   | >=           | 102          | 0            | 2226 |
| ALB.resultn        | >= | 3.05        | TBILL.resultn      | >= | 2.75        |               | Missing      | 2.01E-05     | 2226         |      |
| AST.resultn        | =  | Missing     |                    |    |             |               | 0.000634647  | 2227         |              |      |
| AST.resultn        | <  | 139         | AST.resultn        | =  | Missing     |               | 0.0007096    | 2227         |              |      |
| AST.resultn        | <  | 139         | AST.resultn        | <  | 107.5       |               | 0.000581276  | 2227         |              |      |
| AST.resultn        | <  | 139         | AST.resultn        | >= | 107.5       |               | 0.002092643  | 2227         |              |      |
| AST.resultn        | >= | 139         | Sodium.resultn     | =  | Missing     |               | 0.000153134  | 2227         |              |      |
| AST.resultn        | >= | 139         | Sodium.resultn     | <  | 139.5       |               | 0.000255224  | 2227         |              |      |
| AST.resultn        | >= | 139         | Sodium.resultn     | >= | 139.5       |               | 0            | 2227         |              |      |
| Hemoglobin.resultn | =  | Missing     | TBILL.resultn      | =  | Missing     |               | 0.000614334  | 2228         |              |      |
| Hemoglobin.resultn | =  | Missing     | TBILL.resultn      | <  | 1.05        |               | 0.000171686  | 2228         |              |      |
| Hemoglobin.resultn | =  | Missing     | TBILL.resultn      | >= | 1.05        |               | 0.002384927  | 2228         |              |      |
| Hemoglobin.resultn | <  | 11.85       |                    |    |             |               | -0.000443771 | 2228         |              |      |
| Hemoglobin.resultn | >= | 11.85       | psc.yrs.dur        | =  | Missing     |               | 0.000419227  | 2228         |              |      |
| Hemoglobin.resultn | >= | 11.85       | psc.yrs.dur        | <  | 0.045174538 |               | 0.002547613  | 2228         |              |      |
| Hemoglobin.resultn | >= | 11.85       | psc.yrs.dur        | >= | 0.045174538 |               | 0            | 2228         |              |      |
| ALB.resultn        | =  | Missing     |                    |    |             | Missing       | 0.000863516  | 2229         |              |      |
| ALB.resultn        | <  | 2.965       |                    |    |             | Missing       | 0.001505445  | 2229         |              |      |
| ALB.resultn        | >= | 2.965       | psc.yrs.dur        | =  | Missing     | Missing       | 0.000272715  | 2229         |              |      |
| ALB.resultn        | >= | 2.965       | psc.yrs.dur        | <  | 6.324435318 | TBILL.resultn | =            | Missing      | 7.38E-05     | 2229 |
| ALB.resultn        | >= | 2.965       | psc.yrs.dur        | <  | 6.324435318 | TBILL.resultn | <            | 2.65         | 7.91E-05     | 2229 |
| ALB.resultn        | >= | 2.965       | psc.yrs.dur        | <  | 6.324435318 | TBILL.resultn | >=           | 2.65         | 0            | 2229 |
| ALB.resultn        | >= | 2.965       | psc.yrs.dur        | >= | 6.324435318 |               | Missing      | 0.001888911  | 2229         |      |
| ALB.resultn        | =  | Missing     |                    |    |             | Missing       | 0.000344894  | 2230         |              |      |
| ALB.resultn        | <  | 3.05        |                    |    |             | Missing       | 5.09E-05     | 2230         |              |      |
| ALB.resultn        | >= | 3.05        | TBILL.resultn      | =  | Missing     | Missing       | -0.00131272  | 2230         |              |      |
| ALB.resultn        | >= | 3.05        | TBILL.resultn      | <  | 1.75        | TBILL.resultn | =            | Missing      | -0.001293758 | 2230 |
| ALB.resultn        | >= | 3.05        | TBILL.resultn      | <  | 1.75        | TBILL.resultn | <            | 1.25         | -0.001541329 | 2230 |
| ALB.resultn        | >= | 3.05        | TBILL.resultn      | <  | 1.75        | TBILL.resultn | >=           | 1.25         | 0            | 2230 |
| ALB.resultn        | >= | 3.05        | TBILL.resultn      | >= | 1.75        |               | Missing      | -0.001453479 | 2230         |      |
| psc.yrs.dur        | =  | Missing     |                    |    |             |               | 0.000158143  | 2231         |              |      |
| psc.yrs.dur        | <  | 7.823408624 | ALK.times.uln      | =  | Missing     |               | 0            | 2231         |              |      |
| psc.yrs.dur        | <  | 7.823408624 | ALK.times.uln      | <  | 5.462893197 |               | 1.88E-05     | 2231         |              |      |
| psc.yrs.dur        | <  | 7.823408624 | ALK.times.uln      | >= | 5.462893197 |               | 0.000988552  | 2231         |              |      |
| psc.yrs.dur        | >= | 7.823408624 | AST.resultn        | =  | Missing     |               | 0.000635866  | 2231         |              |      |
| psc.yrs.dur        | >= | 7.823408624 | AST.resultn        | <  | 43          |               | -0.000579388 | 2231         |              |      |
| psc.yrs.dur        | >= | 7.823408624 | AST.resultn        | >= | 43          |               | 0.002111533  | 2231         |              |      |
| ALK.times.uln      | =  | Missing     | age.yrs            | =  | Missing     | Missing       | 0.000864949  | 2232         |              |      |
| ALK.times.uln      | =  | Missing     | age.yrs            | <  | 63.35797399 | age.yrs       | =            | Missing      | 0.000579503  | 2232 |
| ALK.times.uln      | =  | Missing     | age.yrs            | <  | 63.35797399 | age.yrs       | <            | 55.4770705   | 0.000700233  | 2232 |
| ALK.times.uln      | =  | Missing     | age.yrs            | <  | 63.35797399 | age.yrs       | >=           | 55.4770705   | 0            | 2232 |
| ALK.times.uln      | =  | Missing     | age.yrs            | >= | 63.35797399 |               | Missing      | 0.002520537  | 2232         |      |
| ALK.times.uln      | <  | 6.02173913  |                    |    |             | Missing       | 0.000499856  | 2232         |              |      |

|               |    |             |                    |    |             |                    |              |              |              |      |
|---------------|----|-------------|--------------------|----|-------------|--------------------|--------------|--------------|--------------|------|
| ALK.times.uln | >= | 6.02173913  |                    |    |             | Missing            | 0.001469033  | 2232         |              |      |
| age.yrs       | =  | Missing     |                    |    |             | Missing            | -0.001856746 | 2233         |              |      |
| age.yrs       | <  | 69.43052704 | psc.yrs.dur        | =  | Missing     | Missing            | -0.001937233 | 2233         |              |      |
| age.yrs       | <  | 69.43052704 | psc.yrs.dur        | <  | 6.324435318 | Missing            | -0.002030694 | 2233         |              |      |
| age.yrs       | <  | 69.43052704 | psc.yrs.dur        | >= | 6.324435318 | AST.resultn        | =            | Missing      | -0.001460583 | 2233 |
| age.yrs       | <  | 69.43052704 | psc.yrs.dur        | >= | 6.324435318 | AST.resultn        | <            | 89.5         | -0.002001539 | 2233 |
| age.yrs       | <  | 69.43052704 | psc.yrs.dur        | >= | 6.324435318 | AST.resultn        | >=           | 89.5         | 0            | 2233 |
| age.yrs       | >= | 69.43052704 |                    |    |             | Missing            | 0.000107136  | 2233         |              |      |
| age.yrs       | =  | Missing     |                    |    |             |                    | -8.89E-05    | 2234         |              |      |
| age.yrs       | <  | 62.51608487 | ALK.times.uln      | =  | Missing     |                    | 0            | 2234         |              |      |
| age.yrs       | <  | 62.51608487 | ALK.times.uln      | <  | 6.02        |                    | -0.000477926 | 2234         |              |      |
| age.yrs       | <  | 62.51608487 | ALK.times.uln      | >= | 6.02        |                    | 0.000659425  | 2234         |              |      |
| age.yrs       | >= | 62.51608487 | AST.resultn        | =  | Missing     |                    | 0.001243654  | 2234         |              |      |
| age.yrs       | >= | 62.51608487 | AST.resultn        | <  | 51.5        |                    | -0.000796942 | 2234         |              |      |
| age.yrs       | >= | 62.51608487 | AST.resultn        | >= | 51.5        |                    | 0.003430006  | 2234         |              |      |
| ALK.times.uln | =  | Missing     | Sodium.resultn     | =  | Missing     |                    | 0            | 2235         |              |      |
| ALK.times.uln | =  | Missing     | Sodium.resultn     | <  | 140.5       |                    | -0.000273167 | 2235         |              |      |
| ALK.times.uln | =  | Missing     | Sodium.resultn     | >= | 140.5       |                    | 0.002078357  | 2235         |              |      |
| ALK.times.uln | <  | 6.338830603 | TBILL.resultn      | =  | Missing     |                    | 0.000313435  | 2235         |              |      |
| ALK.times.uln | <  | 6.338830603 | TBILL.resultn      | <  | 2.05        |                    | 0.000223921  | 2235         |              |      |
| ALK.times.uln | <  | 6.338830603 | TBILL.resultn      | >= | 2.05        |                    | 0.001304474  | 2235         |              |      |
| ALK.times.uln | >= | 6.338830603 |                    |    |             |                    | -0.00049378  | 2235         |              |      |
| TBILL.resultn | =  | Missing     |                    |    |             | Missing            | 0.001258445  | 2236         |              |      |
| TBILL.resultn | <  | 3.95        | Hemoglobin.resultn | =  | Missing     | ALB.resultn        | =            | Missing      | 0.001032559  | 2236 |
| TBILL.resultn | <  | 3.95        | Hemoglobin.resultn | =  | Missing     | ALB.resultn        | <            | 3.95         | 0.002581399  | 2236 |
| TBILL.resultn | <  | 3.95        | Hemoglobin.resultn | =  | Missing     | ALB.resultn        | >=           | 3.95         | 0            | 2236 |
| TBILL.resultn | <  | 3.95        | Hemoglobin.resultn | <  | 14.15       |                    | Missing      | 0.000594864  | 2236         |      |
| TBILL.resultn | <  | 3.95        | Hemoglobin.resultn | >= | 14.15       |                    | Missing      | -0.000642791 | 2236         |      |
| TBILL.resultn | >= | 3.95        |                    |    |             |                    | Missing      | -6.93E-05    | 2236         |      |
| ALB.resultn   | =  | Missing     |                    |    |             |                    | Missing      | -0.000949074 | 2237         |      |
| ALB.resultn   | <  | 2.95        |                    |    |             |                    | Missing      | 0.000236419  | 2237         |      |
| ALB.resultn   | >= | 2.95        | TBILL.resultn      | =  | Missing     |                    | Missing      | -0.000756015 | 2237         |      |
| ALB.resultn   | >= | 2.95        | TBILL.resultn      | <  | 0.75        |                    | Missing      | -0.001534667 | 2237         |      |
| ALB.resultn   | >= | 2.95        | TBILL.resultn      | >= | 0.75        | Hemoglobin.resultn | =            | Missing      | 0            | 2237 |
| ALB.resultn   | >= | 2.95        | TBILL.resultn      | >= | 0.75        | Hemoglobin.resultn | <            | 13.15        | -0.001154608 | 2237 |
| ALB.resultn   | >= | 2.95        | TBILL.resultn      | >= | 0.75        | Hemoglobin.resultn | >=           | 13.15        | 5.74E-05     | 2237 |
| age.yrs       | =  | Missing     |                    |    |             |                    | Missing      | 0.000652112  | 2238         |      |
| age.yrs       | <  | 69.76043806 | ALK.times.uln      | =  | Missing     | Sodium.resultn     | =            | Missing      | 0            | 2238 |
| age.yrs       | <  | 69.76043806 | ALK.times.uln      | =  | Missing     | Sodium.resultn     | <            | 140.5        | 0.001699612  | 2238 |
| age.yrs       | <  | 69.76043806 | ALK.times.uln      | =  | Missing     | Sodium.resultn     | >=           | 140.5        | 0.000445069  | 2238 |
| age.yrs       | <  | 69.76043806 | ALK.times.uln      | <  | 6.012755102 |                    | Missing      | 0.000285873  | 2238         |      |
| age.yrs       | <  | 69.76043806 | ALK.times.uln      | >= | 6.012755102 |                    | Missing      | 0.001719439  | 2238         |      |
| age.yrs       | >= | 69.76043806 |                    |    |             |                    | Missing      | 0.003809424  | 2238         |      |
| age.yrs       | =  | Missing     |                    |    |             |                    | Missing      | -0.001276765 | 2239         |      |
| age.yrs       | <  | 69.70978782 | Hemoglobin.resultn | =  | Missing     | TBILL.resultn      | =            | Missing      | -0.001566243 | 2239 |
| age.yrs       | <  | 69.70978782 | Hemoglobin.resultn | =  | Missing     | TBILL.resultn      | <            | 1.35         | -0.001949102 | 2239 |
| age.yrs       | <  | 69.70978782 | Hemoglobin.resultn | =  | Missing     | TBILL.resultn      | >=           | 1.35         | 0            | 2239 |
| age.yrs       | <  | 69.70978782 | Hemoglobin.resultn | <  | 11.75       |                    | Missing      | -0.002251228 | 2239         |      |
| age.yrs       | <  | 69.70978782 | Hemoglobin.resultn | >= | 11.75       |                    | Missing      | -0.001224571 | 2239         |      |
| age.yrs       | >= | 69.70978782 |                    |    |             |                    | Missing      | 0.000885526  | 2239         |      |
| ALB.resultn   | =  | Missing     |                    |    |             |                    | Missing      | -0.003114054 | 2240         |      |
| ALB.resultn   | <  | 3.03        |                    |    |             |                    | Missing      | -0.00109713  | 2240         |      |
| ALB.resultn   | >= | 3.03        | TBILL.resultn      | =  | Missing     |                    | Missing      | -0.002198782 | 2240         |      |
| ALB.resultn   | >= | 3.03        | TBILL.resultn      | <  | 2.65        | TBILL.resultn      | =            | Missing      | -0.002182655 | 2240 |
| ALB.resultn   | >= | 3.03        | TBILL.resultn      | <  | 2.65        | TBILL.resultn      | <            | 1.85         | -0.00229814  | 2240 |
| ALB.resultn   | >= | 3.03        | TBILL.resultn      | >= | 2.65        | TBILL.resultn      | >=           | 1.85         | 0            | 2240 |
| ALB.resultn   | >= | 3.03        | TBILL.resultn      | >= | 2.65        |                    | Missing      | -0.002412728 | 2240         |      |
| PLT.resultn   | =  | Missing     |                    |    |             |                    | Missing      | -0.001273108 | 2241         |      |
| PLT.resultn   | <  | 436         | psc.yrs.dur        | =  | Missing     |                    | Missing      | -0.000544583 | 2241         |      |
| PLT.resultn   | <  | 436         | psc.yrs.dur        | <  | 2.043805613 |                    | Missing      | -0.000877125 | 2241         |      |
| PLT.resultn   | <  | 436         | psc.yrs.dur        | >= | 2.043805613 | psc.yrs.dur        | =            | Missing      | 0.000196081  | 2241 |
| PLT.resultn   | <  | 436         | psc.yrs.dur        | >= | 2.043805613 | psc.yrs.dur        | <            | 2.985626283  | 0.001294134  | 2241 |

|                |    |                           |               |                         |               |             |              |              |      |
|----------------|----|---------------------------|---------------|-------------------------|---------------|-------------|--------------|--------------|------|
| PLT.resultn    | <  | 436 psc.yrs.dur           | >=            | 2.043805613 psc.yrs.dur | >=            | 2.985626283 | 0            | 2241         |      |
| PLT.resultn    | >= | 436                       |               |                         |               | Missing     | 0.001192858  | 2241         |      |
| ALB.resultn    | =  | Missing                   |               |                         |               | Missing     | -0.002719291 | 2242         |      |
| ALB.resultn    | <  | 2.95                      |               |                         |               | Missing     | -0.000491631 | 2242         |      |
| ALB.resultn    | >= | 2.95 Hemoglobin.resultn   | =             | Missing                 | TBILI.resultn | =           | Missing      | -0.001733232 | 2242 |
| ALB.resultn    | >= | 2.95 Hemoglobin.resultn   | =             | Missing                 | TBILI.resultn | <           | 1.15         | -0.002708175 | 2242 |
| ALB.resultn    | >= | 2.95 Hemoglobin.resultn   | =             | Missing                 | TBILI.resultn | >=          | 1.15         | 0            | 2242 |
| ALB.resultn    | >= | 2.95 Hemoglobin.resultn   | <             | 14.15                   |               | Missing     | -0.001840485 | 2242         |      |
| ALB.resultn    | >= | 2.95 Hemoglobin.resultn   | >=            | 14.15                   |               | Missing     | -0.002741346 | 2242         |      |
| ALB.resultn    | =  | Missing                   |               |                         |               | Missing     | -0.001069101 | 2243         |      |
| ALB.resultn    | <  | 2.95                      |               |                         |               | Missing     | -3.03E-05    | 2243         |      |
| ALB.resultn    | >= | 2.95 TBILI.resultn        | =             | Missing                 |               | Missing     | -0.001358374 | 2243         |      |
| ALB.resultn    | >= | 2.95 TBILI.resultn        | <             | 0.85                    |               | Missing     | -0.001819346 | 2243         |      |
| ALB.resultn    | >= | 2.95 TBILI.resultn        | >=            | 0.85 age.yrs            | =             | Missing     | -0.000755187 | 2243         |      |
| ALB.resultn    | >= | 2.95 TBILI.resultn        | >=            | 0.85 age.yrs            | <             | 53.4715948  | -0.001043935 | 2243         |      |
| ALB.resultn    | >= | 2.95 TBILI.resultn        | >=            | 0.85 age.yrs            | >=            | 53.4715948  | 0            | 2243         |      |
| Sodium.resultn | =  | Missing                   |               |                         |               | Missing     | -0.003685996 | 2244         |      |
| Sodium.resultn | <  | 136.5                     |               |                         |               | Missing     | -0.002208208 | 2244         |      |
| Sodium.resultn | >= | 136.5 Hemoglobin.resultn  | =             | Missing                 | TBILI.resultn | =           | Missing      | -0.002463433 | 2244 |
| Sodium.resultn | >= | 136.5 Hemoglobin.resultn  | =             | Missing                 | TBILI.resultn | <           | 1.05         | -0.003448806 | 2244 |
| Sodium.resultn | >= | 136.5 Hemoglobin.resultn  | =             | Missing                 | TBILI.resultn | >=          | 1.05         | 0            | 2244 |
| Sodium.resultn | >= | 136.5 Hemoglobin.resultn  | <             | 12.35                   |               | Missing     | -0.003510914 | 2244         |      |
| Sodium.resultn | >= | 136.5 Hemoglobin.resultn  | >=            | 12.35                   |               | Missing     | -0.003506707 | 2244         |      |
| ALB.resultn    | =  | Missing                   |               |                         |               | Missing     | 0.000750908  | 2245         |      |
| ALB.resultn    | <  | 2.85                      |               |                         |               | Missing     | 0.001791338  | 2245         |      |
| ALB.resultn    | >= | 2.85 TBILI.resultn        | =             | Missing                 |               | Missing     | 0.000840303  | 2245         |      |
| ALB.resultn    | >= | 2.85 TBILI.resultn        | <             | 3.75 Sodium.resultn     | =             | Missing     | 0            | 2245         |      |
| ALB.resultn    | >= | 2.85 TBILI.resultn        | <             | 3.75 Sodium.resultn     | <             | 138.5       | 0.001929254  | 2245         |      |
| ALB.resultn    | >= | 2.85 TBILI.resultn        | <             | 3.75 Sodium.resultn     | >=            | 138.5       | 0.001015612  | 2245         |      |
| ALB.resultn    | >= | 2.85 TBILI.resultn        | >=            | 3.75                    |               | Missing     | 0.000256666  | 2245         |      |
| ALK.times.uln  | =  | Missing                   | TBILI.resultn | =                       | Missing       | Missing     | -0.001844958 | 2246         |      |
| ALK.times.uln  | =  | Missing                   | TBILI.resultn | <                       | 0.75          | Missing     | -0.002365051 | 2246         |      |
| ALK.times.uln  | =  | Missing                   | TBILI.resultn | >=                      | 0.75 age.yrs  | =           | Missing      | -0.001304062 | 2246 |
| ALK.times.uln  | =  | Missing                   | TBILI.resultn | >=                      | 0.75 age.yrs  | <           | 50.98151951  | -0.002328682 | 2246 |
| ALK.times.uln  | =  | Missing                   | TBILI.resultn | >=                      | 0.75 age.yrs  | >=          | 50.98151951  | 0            | 2246 |
| ALK.times.uln  | <  | 6.068877551               |               |                         |               | Missing     | -0.001701108 | 2246         |      |
| ALK.times.uln  | >= | 6.068877551               |               |                         |               | Missing     | -0.000785507 | 2246         |      |
| age.yrs        | =  | Missing                   |               |                         |               |             | -1.75E-05    | 2247         |      |
| age.yrs        | <  | 56.60643395 ALK.times.uln | =             | Missing                 |               |             | 0            | 2247         |      |
| age.yrs        | <  | 56.60643395 ALK.times.uln | <             | 7.868810472             |               |             | -0.000512224 | 2247         |      |
| age.yrs        | <  | 56.60643395 ALK.times.uln | >=            | 7.868810472             |               |             | -0.000690717 | 2247         |      |
| age.yrs        | >= | 56.60643395 psc.yrs.dur   | =             | Missing                 |               |             | 0.001876143  | 2247         |      |
| age.yrs        | >= | 56.60643395 psc.yrs.dur   | <             | 0.774811773             |               |             | -0.000134586 | 2247         |      |
| age.yrs        | >= | 56.60643395 psc.yrs.dur   | >=            | 0.774811773             |               |             | 0.004445409  | 2247         |      |
| psc.yrs.dur    | =  | Missing                   |               |                         |               |             | 0.000924633  | 2248         |      |
| psc.yrs.dur    | <  | 6.410677618 PLT.resultn   | =             | Missing                 |               |             | 0            | 2248         |      |
| psc.yrs.dur    | <  | 6.410677618 PLT.resultn   | <             | 249.5                   |               |             | 0.001503879  | 2248         |      |
| psc.yrs.dur    | <  | 6.410677618 PLT.resultn   | >=            | 249.5                   |               |             | 0.00031253   | 2248         |      |
| psc.yrs.dur    | >= | 6.410677618 PLT.resultn   | =             | Missing                 |               |             | 0.002307997  | 2248         |      |
| psc.yrs.dur    | >= | 6.410677618 PLT.resultn   | <             | 234.5                   |               |             | 0.001093672  | 2248         |      |
| psc.yrs.dur    | >= | 6.410677618 PLT.resultn   | >=            | 234.5                   |               |             | 0.004129483  | 2248         |      |
| AST.resultn    | =  | Missing                   |               |                         |               | Missing     | 0.001019971  | 2249         |      |
| AST.resultn    | <  | 118 Sodium.resultn        | =             | Missing                 |               | Missing     | 0.00074887   | 2249         |      |
| AST.resultn    | <  | 118 Sodium.resultn        | <             | 137.5 AST.resultn       | =             | Missing     | 0.00197182   | 2249         |      |
| AST.resultn    | <  | 118 Sodium.resultn        | <             | 137.5 AST.resultn       | <             | 67          | 0.004122896  | 2249         |      |
| AST.resultn    | <  | 118 Sodium.resultn        | >=            | 137.5 AST.resultn       | >=            | 67          | 0            | 2249         |      |
| AST.resultn    | >= | 118                       |               |                         |               | Missing     | 0.001338231  | 2249         |      |
| AST.resultn    | >= | 118                       |               |                         |               | Missing     | 0.000312895  | 2249         |      |
| ALK.times.uln  | =  | Missing                   | TBILI.resultn | =                       | Missing       |             | -0.002179938 | 2250         |      |
| ALK.times.uln  | =  | Missing                   | TBILI.resultn | <                       | 1.65          |             | -0.001025733 | 2250         |      |
| ALK.times.uln  | =  | Missing                   | TBILI.resultn | >=                      | 1.65          |             | 0.000905151  | 2250         |      |
| ALK.times.uln  | <  | 5.438574341               |               |                         |               |             | -0.001916394 | 2250         |      |

|                    |    |             |                |    |             |               |    |              |              |      |
|--------------------|----|-------------|----------------|----|-------------|---------------|----|--------------|--------------|------|
| ALK.times.uln      | >= | 5.438574341 | ALB.resultn    | =  | Missing     |               |    | -0.000583062 | 2250         |      |
| ALK.times.uln      | >= | 5.438574341 | ALB.resultn    | <  | 3.57        |               |    | -0.00122443  | 2250         |      |
| ALK.times.uln      | >= | 5.438574341 | ALB.resultn    | >= | 3.57        |               |    | 0            | 2250         |      |
| TBILL.resultn      | =  | Missing     |                |    |             |               |    | -0.000800666 | 2251         |      |
| TBILL.resultn      | <  | 1.95        | ALB.resultn    | =  | Missing     |               |    | 0            | 2251         |      |
| TBILL.resultn      | <  | 1.95        | ALB.resultn    | <  | 3.615       |               |    | -1.92E-05    | 2251         |      |
| TBILL.resultn      | <  | 1.95        | ALB.resultn    | >= | 3.615       |               |    | -0.001327767 | 2251         |      |
| TBILL.resultn      | >= | 1.95        | PLT.resultn    | =  | Missing     |               |    | -0.000272822 | 2251         |      |
| TBILL.resultn      | >= | 1.95        | PLT.resultn    | <  | 225.5       |               |    | 0.000644473  | 2251         |      |
| TBILL.resultn      | >= | 1.95        | PLT.resultn    | >= | 225.5       |               |    | -0.000884352 | 2251         |      |
| Hemoglobin.resultn | =  | Missing     | TBILL.resultn  | =  | Missing     |               |    | 0.000425995  | 2252         |      |
| Hemoglobin.resultn | =  | Missing     | TBILL.resultn  | <  | 1.15        |               |    | -0.000383595 | 2252         |      |
| Hemoglobin.resultn | =  | Missing     | TBILL.resultn  | >= | 1.15        |               |    | 0.002854764  | 2252         |      |
| Hemoglobin.resultn | <  | 11.05       |                |    |             |               |    | 0.001284801  | 2252         |      |
| Hemoglobin.resultn | >= | 11.05       | TBILL.resultn  | =  | Missing     |               |    | 0.000536447  | 2252         |      |
| Hemoglobin.resultn | >= | 11.05       | TBILL.resultn  | <  | 1.25        |               |    | 0.000767599  | 2252         |      |
| Hemoglobin.resultn | >= | 11.05       | TBILL.resultn  | >= | 1.25        |               |    | 0            | 2252         |      |
| PLT.resultn        | =  | Missing     |                |    |             | Missing       |    | -0.000479455 | 2253         |      |
| PLT.resultn        | <  | 249.5       | ALK.times.uln  | =  | Missing     | TBILL.resultn | =  | Missing      | -0.000709601 | 2253 |
| PLT.resultn        | <  | 249.5       | ALK.times.uln  | =  | Missing     | TBILL.resultn | <  | 0.75         | -0.001774003 | 2253 |
| PLT.resultn        | <  | 249.5       | ALK.times.uln  | =  | Missing     | TBILL.resultn | >= | 0.75         | 0            | 2253 |
| PLT.resultn        | <  | 249.5       | ALK.times.uln  | <  | 2.905037968 |               |    | Missing      | -0.001059778 | 2253 |
| PLT.resultn        | <  | 249.5       | ALK.times.uln  | >= | 2.905037968 |               |    | Missing      | 0.000108304  | 2253 |
| PLT.resultn        | >= | 249.5       |                |    |             |               |    | Missing      | -0.001471159 | 2253 |
| ALK.times.uln      | =  | Missing     |                |    |             |               |    | Missing      | 6.15E-05     | 2254 |
| ALK.times.uln      | <  | 2.822501299 |                |    |             |               |    | Missing      | -0.000167466 | 2254 |
| ALK.times.uln      | >= | 2.822501299 | PLT.resultn    | =  | Missing     |               |    | Missing      | 0.000881301  | 2254 |
| ALK.times.uln      | >= | 2.822501299 | PLT.resultn    | <  | 209.5       |               |    | Missing      | 0.002335589  | 2254 |
| ALK.times.uln      | >= | 2.822501299 | PLT.resultn    | >= | 209.5       | AST.resultn   | =  | Missing      | 0.000540935  | 2254 |
| ALK.times.uln      | >= | 2.822501299 | PLT.resultn    | >= | 209.5       | AST.resultn   | <  | 64           | 0.00231127   | 2254 |
| ALK.times.uln      | >= | 2.822501299 | PLT.resultn    | >= | 209.5       | AST.resultn   | >= | 64           | 0            | 2254 |
| ALK.times.uln      | =  | Missing     | Sodium.resultn | =  | Missing     |               |    | Missing      | -0.002601201 | 2255 |
| ALK.times.uln      | =  | Missing     | Sodium.resultn | <  | 138.5       |               |    | Missing      | -0.003200355 | 2255 |
| ALK.times.uln      | =  | Missing     | Sodium.resultn | >= | 138.5       | AST.resultn   | =  | Missing      | -0.001698361 | 2255 |
| ALK.times.uln      | =  | Missing     | Sodium.resultn | >= | 138.5       | AST.resultn   | <  | 51           | -0.003255191 | 2255 |
| ALK.times.uln      | =  | Missing     | Sodium.resultn | >= | 138.5       | AST.resultn   | >= | 51           | 0            | 2255 |
| ALK.times.uln      | <  | 7.850310559 |                |    |             |               |    | Missing      | -0.002174769 | 2255 |
| ALK.times.uln      | >= | 7.850310559 |                |    |             |               |    | Missing      | -0.002897276 | 2255 |
| ALK.times.uln      | =  | Missing     | TBILL.resultn  | =  | Missing     |               |    |              | 0.000118903  | 2256 |
| ALK.times.uln      | =  | Missing     | TBILL.resultn  | <  | 1.15        |               |    |              | 0.000572904  | 2256 |
| ALK.times.uln      | =  | Missing     | TBILL.resultn  | >= | 1.15        |               |    |              | 0.003031594  | 2256 |
| ALK.times.uln      | <  | 5.446215139 |                |    |             |               |    |              | 0.00035799   | 2256 |
| ALK.times.uln      | >= | 5.446215139 | ALK.times.uln  | =  | Missing     |               |    |              | 0.001526658  | 2256 |
| ALK.times.uln      | >= | 5.446215139 | ALK.times.uln  | <  | 8.257538256 |               |    |              | 0.002701011  | 2256 |
| ALK.times.uln      | >= | 5.446215139 | ALK.times.uln  | >= | 8.257538256 |               |    |              | 0            | 2256 |
| AST.resultn        | =  | Missing     |                |    |             |               |    | Missing      | -0.001059624 | 2257 |
| AST.resultn        | <  | 149         | TBILL.resultn  | =  | Missing     |               |    | Missing      | -8.24E-05    | 2257 |
| AST.resultn        | <  | 149         | TBILL.resultn  | <  | 2.05        | ALK.times.uln | =  | Missing      | 0            | 2257 |
| AST.resultn        | <  | 149         | TBILL.resultn  | <  | 2.05        | ALK.times.uln | <  | 3.593257185  | -0.000369012 | 2257 |
| AST.resultn        | <  | 149         | TBILL.resultn  | <  | 2.05        | ALK.times.uln | >= | 3.593257185  | 0.001097607  | 2257 |
| AST.resultn        | <  | 149         | TBILL.resultn  | >= | 2.05        |               |    | Missing      | 0.000650077  | 2257 |
| AST.resultn        | >= | 149         |                |    |             |               |    | Missing      | -0.000788469 | 2257 |
| ALK.times.uln      | =  | Missing     |                |    |             |               |    | Missing      | 0.000699905  | 2258 |
| ALK.times.uln      | <  | 2.822501299 |                |    |             |               |    | Missing      | -0.000539031 | 2258 |
| ALK.times.uln      | >= | 2.822501299 | psc.yrs.dur    | =  | Missing     |               |    | Missing      | 0.000885666  | 2258 |
| ALK.times.uln      | >= | 2.822501299 | psc.yrs.dur    | <  | 2.683093771 | AST.resultn   | =  | Missing      | 0.000370535  | 2258 |
| ALK.times.uln      | >= | 2.822501299 | psc.yrs.dur    | <  | 2.683093771 | AST.resultn   | <  | 65.5         | 0.001741513  | 2258 |
| ALK.times.uln      | >= | 2.822501299 | psc.yrs.dur    | <  | 2.683093771 | AST.resultn   | >= | 65.5         | 0            | 2258 |
| ALK.times.uln      | >= | 2.822501299 | psc.yrs.dur    | >= | 2.683093771 |               |    | Missing      | 0.002230733  | 2258 |
| age.yrs            | =  | Missing     |                |    |             |               |    | Missing      | -0.006897142 | 2259 |
| age.yrs            | <  | 56.84188912 |                |    |             |               |    | Missing      | -0.007391126 | 2259 |
| age.yrs            | >= | 56.84188912 | TBILL.resultn  | =  | Missing     |               |    | Missing      | -0.004663475 | 2259 |



|                |    |             |               |    |             |               |              |             |              |      |
|----------------|----|-------------|---------------|----|-------------|---------------|--------------|-------------|--------------|------|
| age.yrs        | >= | 56.84188912 | TBILL.resultn | <  | 0.65        | Missing       | -0.008169313 | 2259        |              |      |
| age.yrs        | >= | 56.84188912 | TBILL.resultn | >= | 0.65        | PLT.resultn   | =            | Missing     | -0.003080193 | 2259 |
| age.yrs        | >= | 56.84188912 | TBILL.resultn | >= | 0.65        | PLT.resultn   | <            | 236         | -0.007560474 | 2259 |
| age.yrs        | >= | 56.84188912 | TBILL.resultn | >= | 0.65        | PLT.resultn   | >=           | 236         | 0            | 2259 |
| ALB.resultn    | =  | Missing     |               |    |             | Missing       |              |             | 0.000200414  | 2260 |
| ALB.resultn    | <  | 2.875       |               |    |             | Missing       |              |             | 0.000664158  | 2260 |
| ALB.resultn    | >= | 2.875       | ALB.resultn   | =  | Missing     |               |              |             | -0.000236184 | 2260 |
| ALB.resultn    | >= | 2.875       | ALB.resultn   | <  | 3.45        |               |              |             | -0.000593787 | 2260 |
| ALB.resultn    | >= | 2.875       | ALB.resultn   | >= | 3.45        | ALK.times.uln | =            | Missing     | 0            | 2260 |
| ALB.resultn    | >= | 2.875       | ALB.resultn   | >= | 3.45        | ALK.times.uln | <            | 5.462893197 | -0.000372615 | 2260 |
| ALB.resultn    | >= | 2.875       | ALB.resultn   | >= | 3.45        | ALK.times.uln | >=           | 5.462893197 | 0.001573185  | 2260 |
| psc.yrs.dur    | =  | Missing     |               |    |             | Missing       |              |             | -0.001175383 | 2261 |
| psc.yrs.dur    | <  | 1.961670089 |               |    |             | Missing       |              |             | -0.001553108 | 2261 |
| psc.yrs.dur    | >= | 1.961670089 | psc.yrs.dur   | =  | Missing     |               |              |             | -0.000238834 | 2261 |
| psc.yrs.dur    | >= | 1.961670089 | psc.yrs.dur   | <  | 2.373716632 |               |              |             | 0.004287132  | 2261 |
| psc.yrs.dur    | >= | 1.961670089 | psc.yrs.dur   | >= | 2.373716632 | age.yrs       | =            | Missing     | -0.001041827 | 2261 |
| psc.yrs.dur    | >= | 1.961670089 | psc.yrs.dur   | >= | 2.373716632 | age.yrs       | <            | 60.04928131 | -0.001242179 | 2261 |
| psc.yrs.dur    | >= | 1.961670089 | psc.yrs.dur   | >= | 2.373716632 | age.yrs       | >=           | 60.04928131 | 0            | 2261 |
| Sodium.resultn | =  | Missing     |               |    |             | Missing       |              |             | 0.000196605  | 2262 |
| Sodium.resultn | <  | 141.5       | ALB.resultn   | =  | Missing     |               |              |             | -0.000788417 | 2262 |
| Sodium.resultn | <  | 141.5       | ALB.resultn   | <  | 3.35        |               |              |             | 0.001069931  | 2262 |
| Sodium.resultn | <  | 141.5       | ALB.resultn   | >= | 3.35        | psc.yrs.dur   | =            | Missing     | 0.00036361   | 2262 |
| Sodium.resultn | <  | 141.5       | ALB.resultn   | >= | 3.35        | psc.yrs.dur   | <            | 0.043805613 | 0.002181658  | 2262 |
| Sodium.resultn | <  | 141.5       | ALB.resultn   | >= | 3.35        | psc.yrs.dur   | >=           | 0.043805613 | 0            | 2262 |
| Sodium.resultn | >= | 141.5       |               |    |             | Missing       |              |             | -0.000411233 | 2262 |
| AST.resultn    | =  | Missing     |               |    |             | Missing       |              |             | -0.000290218 | 2263 |
| AST.resultn    | <  | 123.5       | TBILL.resultn | =  | Missing     |               |              |             | -0.000268312 | 2263 |
| AST.resultn    | <  | 123.5       | TBILL.resultn | <  | 1.65        | ALK.times.uln | =            | Missing     | 0            | 2263 |
| AST.resultn    | <  | 123.5       | TBILL.resultn | <  | 1.65        | ALK.times.uln | <            | 2.893313702 | -0.000974834 | 2263 |
| AST.resultn    | <  | 123.5       | TBILL.resultn | <  | 1.65        | ALK.times.uln | >=           | 2.893313702 | 0.001118008  | 2263 |
| AST.resultn    | <  | 123.5       | TBILL.resultn | >= | 1.65        |               |              |             | 0.001129125  | 2263 |
| AST.resultn    | >= | 123.5       |               |    |             | Missing       |              |             | -0.000403034 | 2263 |
| TBILL.resultn  | =  | Missing     |               |    |             | Missing       |              |             | 0.001050631  | 2264 |
| TBILL.resultn  | <  | 0.85        |               |    |             | Missing       |              |             | -7.92E-06    | 2264 |
| TBILL.resultn  | >= | 0.85        | ALB.resultn   | =  | Missing     |               |              |             | 0.001540156  | 2264 |
| TBILL.resultn  | >= | 0.85        | ALB.resultn   | <  | 3.615       | PLT.resultn   | =            | Missing     | 0.001867227  | 2264 |
| TBILL.resultn  | >= | 0.85        | ALB.resultn   | <  | 3.615       | PLT.resultn   | <            | 268         | 0.00359082   | 2264 |
| TBILL.resultn  | >= | 0.85        | ALB.resultn   | <  | 3.615       | PLT.resultn   | >=           | 268         | 0            | 2264 |
| TBILL.resultn  | >= | 0.85        | ALB.resultn   | >= | 3.615       |               |              |             | 0.001411131  | 2264 |
| age.yrs        | =  | Missing     |               |    |             | Missing       |              |             | -0.002131259 | 2265 |
| age.yrs        | <  | 49.10198494 |               |    |             | Missing       |              |             | -0.002392658 | 2265 |
| age.yrs        | >= | 49.10198494 | AST.resultn   | =  | Missing     |               |              |             | -0.001693761 | 2265 |
| age.yrs        | >= | 49.10198494 | AST.resultn   | <  | 51.5        |               |              |             | -0.002625626 | 2265 |
| age.yrs        | >= | 49.10198494 | AST.resultn   | >= | 51.5        | psc.yrs.dur   | =            | Missing     | -0.00080155  | 2265 |
| age.yrs        | >= | 49.10198494 | AST.resultn   | >= | 51.5        | psc.yrs.dur   | <            | 0.465434634 | -0.001569702 | 2265 |
| age.yrs        | >= | 49.10198494 | AST.resultn   | >= | 51.5        | psc.yrs.dur   | >=           | 0.465434634 | 0            | 2265 |
| ALB.resultn    | =  | Missing     |               |    |             | Missing       |              |             | -0.001614056 | 2266 |
| ALB.resultn    | <  | 3.15        |               |    |             | Missing       |              |             | 0.000193842  | 2266 |
| ALB.resultn    | >= | 3.15        | TBILL.resultn | =  | Missing     |               |              |             | -0.001256356 | 2266 |
| ALB.resultn    | >= | 3.15        | TBILL.resultn | <  | 0.85        |               |              |             | -0.001633351 | 2266 |
| ALB.resultn    | >= | 3.15        | TBILL.resultn | >= | 0.85        | age.yrs       | =            | Missing     | -0.000690864 | 2266 |
| ALB.resultn    | >= | 3.15        | TBILL.resultn | >= | 0.85        | age.yrs       | <            | 49.15811088 | -0.001261578 | 2266 |
| ALB.resultn    | >= | 3.15        | TBILL.resultn | >= | 0.85        | age.yrs       | >=           | 49.15811088 | 0            | 2266 |
| ALK.times.uln  | =  | Missing     |               |    |             | Missing       |              |             | 0.000792738  | 2267 |
| ALK.times.uln  | <  | 2.781735492 |               |    |             | Missing       |              |             | 0.000595926  | 2267 |
| ALK.times.uln  | >= | 2.781735492 | PLT.resultn   | =  | Missing     |               |              |             | 0.001545377  | 2267 |
| ALK.times.uln  | >= | 2.781735492 | PLT.resultn   | <  | 218.5       |               |              |             | 0.00283086   | 2267 |
| ALK.times.uln  | >= | 2.781735492 | PLT.resultn   | >= | 218.5       | TBILL.resultn | =            | Missing     | 0.001246427  | 2267 |
| ALK.times.uln  | >= | 2.781735492 | PLT.resultn   | >= | 218.5       | TBILL.resultn | <            | 1.5         | 0.001938887  | 2267 |
| ALK.times.uln  | >= | 2.781735492 | PLT.resultn   | >= | 218.5       | TBILL.resultn | >=           | 1.5         | 0            | 2267 |
| psc.yrs.dur    | =  | Missing     |               |    |             |               |              |             | 0.000854413  | 2268 |
| psc.yrs.dur    | <  | 6.262833676 | AST.resultn   | =  | Missing     |               |              |             | 0            | 2268 |

|             |    |                         |    |                          |         |              |              |      |
|-------------|----|-------------------------|----|--------------------------|---------|--------------|--------------|------|
| psc.yrs.dur | <  | 6.262833676 AST.resultn | <  | 141                      |         | 0.000848364  | 2268         |      |
| psc.yrs.dur | <  | 6.262833676 AST.resultn | >= | 141                      |         | 0.000256078  | 2268         |      |
| psc.yrs.dur | >= | 6.262833676 AST.resultn | =  | Missing                  |         | 0.001452236  | 2268         |      |
| psc.yrs.dur | >= | 6.262833676 AST.resultn | <  | 57                       |         | 0.000796375  | 2268         |      |
| psc.yrs.dur | >= | 6.262833676 AST.resultn | >= | 57                       |         | 0.002142615  | 2268         |      |
| ALB.resultn | =  | Missing                 |    |                          | Missing | -0.002152495 | 2269         |      |
| ALB.resultn | <  | 2.825                   |    |                          | Missing | -0.000109246 | 2269         |      |
| ALB.resultn | >= | 2.825 Sodium.resultn    | =  | Missing                  | Missing | -0.001234576 | 2269         |      |
| ALB.resultn | >= | 2.825 Sodium.resultn    | <  | 136.5                    | Missing | -4.10E-06    | 2269         |      |
| ALB.resultn | >= | 2.825 Sodium.resultn    | >= | 136.5 Hemoglobin.resultn | =       | Missing      | 0            | 2269 |
| ALB.resultn | >= | 2.825 Sodium.resultn    | >= | 136.5 Hemoglobin.resultn | <       | 15.45        | -0.001925532 | 2269 |
| ALB.resultn | >= | 2.825 Sodium.resultn    | >= | 136.5 Hemoglobin.resultn | >=      | 15.45        | -0.000148378 | 2269 |
| ALB.resultn | =  | Missing                 |    |                          |         | -0.000692631 | 2270         |      |
| ALB.resultn | <  | 3.33 Hemoglobin.resultn | =  | Missing                  |         | 0.000500848  | 2270         |      |
| ALB.resultn | <  | 3.33 Hemoglobin.resultn | <  | 11.75                    |         | 0.00034312   | 2270         |      |
| ALB.resultn | <  | 3.33 Hemoglobin.resultn | >= | 11.75                    |         | 0.000690123  | 2270         |      |
| ALB.resultn | >= | 3.33 TBILL.resultn      | =  | Missing                  |         | -0.000893036 | 2270         |      |
| ALB.resultn | >= | 3.33 TBILL.resultn      | <  | 0.95                     |         | -0.001399324 | 2270         |      |
| ALB.resultn | >= | 3.33 TBILL.resultn      | >= | 0.95                     |         | 0            | 2270         |      |
| AST.resultn | =  | Missing                 |    |                          | Missing | -0.002026654 | 2271         |      |
| AST.resultn | <  | 111.5 AST.resultn       | =  | Missing                  | Missing | -0.001265823 | 2271         |      |
| AST.resultn | <  | 111.5 AST.resultn       | <  | 43.5                     | Missing | -0.002024822 | 2271         |      |
| AST.resultn | <  | 111.5 AST.resultn       | >= | 43.5 Hemoglobin.resultn  | =       | Missing      | 0            | 2271 |
| AST.resultn | <  | 111.5 AST.resultn       | >= | 43.5 Hemoglobin.resultn  | <       | 14.15        | -1.79E-05    | 2271 |
| AST.resultn | <  | 111.5 AST.resultn       | >= | 43.5 Hemoglobin.resultn  | >=      | 14.15        | -0.00141739  | 2271 |
| AST.resultn | >= | 111.5                   |    |                          | Missing | -0.001457914 | 2271         |      |
| psc.yrs.dur | =  | Missing                 |    |                          |         | 0.000333112  | 2272         |      |
| psc.yrs.dur | <  | 7.823408624 psc.yrs.dur | =  | Missing                  |         | 0.000184813  | 2272         |      |
| psc.yrs.dur | <  | 7.823408624 psc.yrs.dur | <  | 0.004106776              |         | 0.001570906  | 2272         |      |
| psc.yrs.dur | <  | 7.823408624 psc.yrs.dur | >= | 0.004106776              |         | 0            | 2272         |      |
| psc.yrs.dur | >= | 7.823408624 ALB.resultn | =  | Missing                  |         | 0.001326265  | 2272         |      |
| psc.yrs.dur | >= | 7.823408624 ALB.resultn | <  | 3.965                    |         | 0.00222199   | 2272         |      |
| psc.yrs.dur | >= | 7.823408624 ALB.resultn | >= | 3.965                    |         | 0.000760544  | 2272         |      |
| ALB.resultn | =  | Missing                 |    |                          | Missing | -0.000600491 | 2273         |      |
| ALB.resultn | <  | 2.95                    |    |                          | Missing | -0.000622048 | 2273         |      |
| ALB.resultn | >= | 2.95 psc.yrs.dur        | =  | Missing                  | Missing | -0.002159687 | 2273         |      |
| ALB.resultn | >= | 2.95 psc.yrs.dur        | <  | 7.404517454              | Missing | -0.002313914 | 2273         |      |
| ALB.resultn | >= | 2.95 psc.yrs.dur        | >= | 7.404517454 age.yrs      | =       | Missing      | -0.001118656 | 2273 |
| ALB.resultn | >= | 2.95 psc.yrs.dur        | >= | 7.404517454 age.yrs      | <       | 51.63175907  | -0.002610196 | 2273 |
| ALB.resultn | >= | 2.95 psc.yrs.dur        | >= | 7.404517454 age.yrs      | >=      | 51.63175907  | 0            | 2273 |
| AST.resultn | =  | Missing                 |    |                          | Missing | -0.002150266 | 2274         |      |
| AST.resultn | <  | 106.5                   |    |                          | Missing | -0.001572658 | 2274         |      |
| AST.resultn | >= | 106.5 psc.yrs.dur       | =  | Missing                  | Missing | -0.001050369 | 2274         |      |
| AST.resultn | >= | 106.5 psc.yrs.dur       | <  | 2.20807666               | Missing | -0.001529436 | 2274         |      |
| AST.resultn | >= | 106.5 psc.yrs.dur       | >= | 2.20807666 age.yrs       | =       | Missing      | -0.000411614 | 2274 |
| AST.resultn | >= | 106.5 psc.yrs.dur       | >= | 2.20807666 age.yrs       | <       | 43.82477755  | -0.000864389 | 2274 |
| AST.resultn | >= | 106.5 psc.yrs.dur       | >= | 2.20807666 age.yrs       | >=      | 43.82477755  | 0            | 2274 |
| ALB.resultn | =  | Missing                 |    |                          | Missing | -6.69E-05    | 2275         |      |
| ALB.resultn | <  | 2.95                    |    |                          | Missing | 0.000778928  | 2275         |      |
| ALB.resultn | >= | 2.95 Sodium.resultn     | =  | Missing                  | Missing | -0.000526443 | 2275         |      |
| ALB.resultn | >= | 2.95 Sodium.resultn     | <  | 138.5 ALK.times.uln      | =       | Missing      | 0            | 2275 |
| ALB.resultn | >= | 2.95 Sodium.resultn     | <  | 138.5 ALK.times.uln      | <       | 2.795652174  | -0.000954149 | 2275 |
| ALB.resultn | >= | 2.95 Sodium.resultn     | <  | 138.5 ALK.times.uln      | >=      | 2.795652174  | 0.003921501  | 2275 |
| ALB.resultn | >= | 2.95 Sodium.resultn     | >= | 138.5                    | Missing | -0.000346084 | 2275         |      |
| ALB.resultn | =  | Missing                 |    |                          | Missing | -0.002004657 | 2276         |      |
| ALB.resultn | <  | 2.915                   |    |                          | Missing | -0.001145382 | 2276         |      |
| ALB.resultn | >= | 2.915 ALB.resultn       | =  | Missing                  | Missing | -0.001817165 | 2276         |      |
| ALB.resultn | >= | 2.915 ALB.resultn       | <  | 3.15                     | Missing | -0.002448699 | 2276         |      |
| ALB.resultn | >= | 2.915 ALB.resultn       | >= | 3.15 psc.yrs.dur         | =       | Missing      | -0.001775909 | 2276 |
| ALB.resultn | >= | 2.915 ALB.resultn       | >= | 3.15 psc.yrs.dur         | <       | 6.324435318  | -0.002031068 | 2276 |
| ALB.resultn | >= | 2.915 ALB.resultn       | >= | 3.15 psc.yrs.dur         | >=      | 6.324435318  | 0            | 2276 |
| age.yrs     | =  | Missing                 |    |                          |         | 0.000309003  | 2277         |      |

|               |    |             |                |    |             |               |         |              |              |      |
|---------------|----|-------------|----------------|----|-------------|---------------|---------|--------------|--------------|------|
| age.yrs       | <  | 62.51608487 | ALK.times.uln  | =  | Missing     |               |         | 0            | 2277         |      |
| age.yrs       | <  | 62.51608487 | ALK.times.uln  | <  | 7.861978174 |               |         | 0.000397034  | 2277         |      |
| age.yrs       | <  | 62.51608487 | ALK.times.uln  | >= | 7.861978174 |               |         | -0.00013712  | 2277         |      |
| age.yrs       | >= | 62.51608487 | AST.resultn    | =  | Missing     |               |         | 0.000719325  | 2277         |      |
| age.yrs       | >= | 62.51608487 | AST.resultn    | <  | 51.5        |               |         | -0.000643815 | 2277         |      |
| age.yrs       | >= | 62.51608487 | AST.resultn    | >= | 51.5        |               |         | 0.002082465  | 2277         |      |
| TBILL.resultn | =  | Missing     |                |    |             |               |         | -0.000796474 | 2278         |      |
| TBILL.resultn | <  | 2.35        | age.yrs        | =  | Missing     |               |         | -0.002373144 | 2278         |      |
| TBILL.resultn | <  | 2.35        | age.yrs        | <  | 68.66940452 |               |         | -0.002488345 | 2278         |      |
| TBILL.resultn | <  | 2.35        | age.yrs        | >= | 68.66940452 |               |         | 0            | 2278         |      |
| TBILL.resultn | >= | 2.35        | psc.yrs.dur    | =  | Missing     |               |         | -0.001883025 | 2278         |      |
| TBILL.resultn | >= | 2.35        | psc.yrs.dur    | <  | 2.156057495 |               |         | -0.002502023 | 2278         |      |
| TBILL.resultn | >= | 2.35        | psc.yrs.dur    | >= | 2.156057495 |               |         | -0.001078327 | 2278         |      |
| ALK.times.uln | =  | Missing     | TBILL.resultn  | =  | Missing     |               |         | -0.000786757 | 2279         |      |
| ALK.times.uln | =  | Missing     | TBILL.resultn  | <  | 1.26        |               |         | -0.000750331 | 2279         |      |
| ALK.times.uln | =  | Missing     | TBILL.resultn  | >= | 1.26        |               |         | 0.002347879  | 2279         |      |
| ALK.times.uln | <  | 7.861978174 | psc.yrs.dur    | =  | Missing     |               |         | 0.000325468  | 2279         |      |
| ALK.times.uln | <  | 7.861978174 | psc.yrs.dur    | <  | 0.043805613 |               |         | 0.001646483  | 2279         |      |
| ALK.times.uln | <  | 7.861978174 | psc.yrs.dur    | >= | 0.043805613 |               |         | 0            | 2279         |      |
| ALK.times.uln | >= | 7.861978174 |                |    |             |               |         | -0.000233944 | 2279         |      |
| AST.resultn   | =  | Missing     |                |    |             | Missing       |         | -0.002031327 | 2280         |      |
| AST.resultn   | <  | 139.5       | TBILL.resultn  | =  | Missing     | Missing       |         | -0.00189985  | 2280         |      |
| AST.resultn   | <  | 139.5       | TBILL.resultn  | <  | 1.65        | Missing       |         | -0.002028544 | 2280         |      |
| AST.resultn   | <  | 139.5       | TBILL.resultn  | >= | 1.65        | psc.yrs.dur   | =       | Missing      | -0.000875891 | 2280 |
| AST.resultn   | <  | 139.5       | TBILL.resultn  | >= | 1.65        | psc.yrs.dur   | <       | 0.847364819  | -0.001678792 | 2280 |
| AST.resultn   | <  | 139.5       | TBILL.resultn  | >= | 1.65        | psc.yrs.dur   | >=      | 0.847364819  | 0            | 2280 |
| AST.resultn   | >= | 139.5       |                |    |             | Missing       |         | -0.002794623 | 2280         |      |
| ALB.resultn   | =  | Missing     |                |    |             | Missing       |         | -0.000866989 | 2281         |      |
| ALB.resultn   | <  | 2.915       |                |    |             | Missing       |         | 0.000873039  | 2281         |      |
| ALB.resultn   | >= | 2.915       | AST.resultn    | =  | Missing     | Missing       |         | 5.39E-05     | 2281         |      |
| ALB.resultn   | >= | 2.915       | AST.resultn    | <  | 213.5       | ALB.resultn   | =       | Missing      | -2.26E-05    | 2281 |
| ALB.resultn   | >= | 2.915       | AST.resultn    | <  | 213.5       | ALB.resultn   | <       | 3.165        | -0.000450408 | 2281 |
| ALB.resultn   | >= | 2.915       | AST.resultn    | <  | 213.5       | ALB.resultn   | >=      | 3.165        | 0            | 2281 |
| ALB.resultn   | >= | 2.915       | AST.resultn    | >= | 213.5       |               | Missing | 0.001438057  | 2281         |      |
| ALB.resultn   | =  | Missing     |                |    |             |               |         | -0.000338892 | 2282         |      |
| ALB.resultn   | <  | 3.31        | psc.yrs.dur    | =  | Missing     |               |         | 0.001206951  | 2282         |      |
| ALB.resultn   | <  | 3.31        | psc.yrs.dur    | <  | 1.497604381 |               |         | 0.00048996   | 2282         |      |
| ALB.resultn   | <  | 3.31        | psc.yrs.dur    | >= | 1.497604381 |               |         | 0.001758483  | 2282         |      |
| ALB.resultn   | >= | 3.31        | Sodium.resultn | =  | Missing     |               |         | 0            | 2282         |      |
| ALB.resultn   | >= | 3.31        | Sodium.resultn | <  | 142.5       |               |         | 0.000375428  | 2282         |      |
| ALB.resultn   | >= | 3.31        | Sodium.resultn | >= | 142.5       |               |         | 0.001887022  | 2282         |      |
| ALB.resultn   | =  | Missing     |                |    |             | Missing       |         | -0.00084586  | 2283         |      |
| ALB.resultn   | <  | 3.615       | PLT.resultn    | =  | Missing     | Missing       |         | 0.001000418  | 2283         |      |
| ALB.resultn   | <  | 3.615       | PLT.resultn    | <  | 223.5       | Missing       |         | 0.002827463  | 2283         |      |
| ALB.resultn   | <  | 3.615       | PLT.resultn    | >= | 223.5       | TBILL.resultn | =       | Missing      | 0.000565407  | 2283 |
| ALB.resultn   | <  | 3.615       | PLT.resultn    | >= | 223.5       | TBILL.resultn | <       | 1.55         | 0.000807724  | 2283 |
| ALB.resultn   | <  | 3.615       | PLT.resultn    | >= | 223.5       | TBILL.resultn | >=      | 1.55         | 0            | 2283 |
| ALB.resultn   | >= | 3.615       |                |    |             | Missing       |         | -0.000124567 | 2283         |      |
| ALK.times.uln | =  | Missing     |                |    |             | Missing       |         | -0.000393392 | 2284         |      |
| ALK.times.uln | <  | 7.405360736 | AST.resultn    | =  | Missing     | Missing       |         | -0.000105249 | 2284         |      |
| ALK.times.uln | <  | 7.405360736 | AST.resultn    | <  | 47.5        | Missing       |         | -0.001181618 | 2284         |      |
| ALK.times.uln | <  | 7.405360736 | AST.resultn    | >= | 47.5        | AST.resultn   | =       | Missing      | 0.000780512  | 2284 |
| ALK.times.uln | <  | 7.405360736 | AST.resultn    | >= | 47.5        | AST.resultn   | <       | 59.5         | 0.004683073  | 2284 |
| ALK.times.uln | <  | 7.405360736 | AST.resultn    | >= | 47.5        | AST.resultn   | >=      | 59.5         | 0            | 2284 |
| ALK.times.uln | >= | 7.405360736 |                |    |             | Missing       |         | -0.000788571 | 2284         |      |
| ALK.times.uln | =  | Missing     | ALB.resultn    | =  | Missing     |               |         | -0.001009413 | 2285         |      |
| ALK.times.uln | =  | Missing     | ALB.resultn    | <  | 3.95        |               |         | 0.000864739  | 2285         |      |
| ALK.times.uln | =  | Missing     | ALB.resultn    | >= | 3.95        |               |         | -0.001014006 | 2285         |      |
| ALK.times.uln | <  | 4.964143426 |                |    |             |               |         | -0.000438045 | 2285         |      |
| ALK.times.uln | >= | 4.964143426 | PLT.resultn    | =  | Missing     |               |         | 0.000482149  | 2285         |      |
| ALK.times.uln | >= | 4.964143426 | PLT.resultn    | <  | 273         |               |         | 0.000964299  | 2285         |      |
| ALK.times.uln | >= | 4.964143426 | PLT.resultn    | >= | 273         |               |         | 0            | 2285         |      |

|               |    |             |                |    |             |                    |            |             |              |      |
|---------------|----|-------------|----------------|----|-------------|--------------------|------------|-------------|--------------|------|
| age.yrs       | =  | Missing     |                |    | Missing     | 0.000392379        | 2286       |             |              |      |
| age.yrs       | <  | 69.84257358 | age.yrs        | =  | Missing     | Missing            | 0.00030685 | 2286        |              |      |
| age.yrs       | <  | 69.84257358 | age.yrs        | <  | 38.4202601  | ALK.times.uln      | =          | Missing     | 0            | 2286 |
| age.yrs       | <  | 69.84257358 | age.yrs        | <  | 38.4202601  | ALK.times.uln      | <          | 2.782608696 | 0.000231016  | 2286 |
| age.yrs       | <  | 69.84257358 | age.yrs        | <  | 38.4202601  | ALK.times.uln      | >=         | 2.782608696 | 0.002747757  | 2286 |
| age.yrs       | <  | 69.84257358 | age.yrs        | >= | 38.4202601  |                    | Missing    |             | -4.38E-06    | 2286 |
| age.yrs       | >= | 69.84257358 |                |    |             |                    | Missing    |             | 0.002479293  | 2286 |
| ALK.times.uln | =  | Missing     |                |    |             |                    | Missing    |             | -0.004680354 | 2287 |
| ALK.times.uln | <  | 6.02173913  | Sodium.resultn | =  | Missing     |                    | Missing    |             | -0.003944433 | 2287 |
| ALK.times.uln | <  | 6.02173913  | Sodium.resultn | <  | 138.5       | psc.yrs.dur        | =          | Missing     | -0.003025471 | 2287 |
| ALK.times.uln | <  | 6.02173913  | Sodium.resultn | <  | 138.5       | psc.yrs.dur        | <          | 1.249828884 | -0.004340893 | 2287 |
| ALK.times.uln | <  | 6.02173913  | Sodium.resultn | <  | 138.5       | psc.yrs.dur        | >=         | 1.249828884 | 0            | 2287 |
| ALK.times.uln | <  | 6.02173913  | Sodium.resultn | >= | 138.5       |                    | Missing    |             | -0.004798216 | 2287 |
| ALK.times.uln | >= | 6.02173913  |                |    |             |                    | Missing    |             | -0.003282059 | 2287 |
| ALK.times.uln | =  | Missing     |                |    |             |                    | Missing    |             | 0.001191694  | 2288 |
| ALK.times.uln | <  | 7.405360736 | TBILL.resultn  | =  | Missing     |                    | Missing    |             | 0.000714919  | 2288 |
| ALK.times.uln | <  | 7.405360736 | TBILL.resultn  | <  | 0.75        |                    | Missing    |             | -1.30E-06    | 2288 |
| ALK.times.uln | <  | 7.405360736 | TBILL.resultn  | >= | 0.75        | Hemoglobin.resultn | =          | Missing     | 0.001323321  | 2288 |
| ALK.times.uln | <  | 7.405360736 | TBILL.resultn  | >= | 0.75        | Hemoglobin.resultn | <          | 14.95       | 0.001718342  | 2288 |
| ALK.times.uln | <  | 7.405360736 | TBILL.resultn  | >= | 0.75        | Hemoglobin.resultn | >=         | 14.95       | 0            | 2288 |
| ALK.times.uln | >= | 7.405360736 |                |    |             |                    | Missing    |             | 0.000435248  | 2288 |
| ALB.resultn   | =  | Missing     |                |    |             |                    | Missing    |             | -3.39E-05    | 2289 |
| ALB.resultn   | <  | 3.03        |                |    |             |                    | Missing    |             | 0.002043647  | 2289 |
| ALB.resultn   | >= | 3.03        | age.yrs        | =  | Missing     |                    | Missing    |             | 0.000774462  | 2289 |
| ALB.resultn   | >= | 3.03        | age.yrs        | <  | 62.47912389 |                    | Missing    |             | 0.000696748  | 2289 |
| ALB.resultn   | >= | 3.03        | age.yrs        | >= | 62.47912389 | ALB.resultn        | =          | Missing     | 0.001470359  | 2289 |
| ALB.resultn   | >= | 3.03        | age.yrs        | >= | 62.47912389 | ALB.resultn        | <          | 3.95        | 0.002695658  | 2289 |
| ALB.resultn   | >= | 3.03        | age.yrs        | >= | 62.47912389 | ALB.resultn        | >=         | 3.95        | 0            | 2289 |
| TBILL.resultn | =  | Missing     |                |    |             |                    | Missing    |             | 0.000649648  | 2290 |
| TBILL.resultn | <  | 0.85        |                |    |             |                    | Missing    |             | -0.001018215 | 2290 |
| TBILL.resultn | >= | 0.85        | age.yrs        | =  | Missing     |                    | Missing    |             | 0.000134407  | 2290 |
| TBILL.resultn | >= | 0.85        | age.yrs        | <  | 49.14852841 |                    | Missing    |             | -0.000411742 | 2290 |
| TBILL.resultn | >= | 0.85        | age.yrs        | >= | 49.14852841 | ALB.resultn        | =          | Missing     | 0.000832971  | 2290 |
| TBILL.resultn | >= | 0.85        | age.yrs        | >= | 49.14852841 | ALB.resultn        | <          | 3.95        | 0.001552354  | 2290 |
| TBILL.resultn | >= | 0.85        | age.yrs        | >= | 49.14852841 | ALB.resultn        | >=         | 3.95        | 0            | 2290 |
| psc.yrs.dur   | =  | Missing     |                |    |             |                    | Missing    |             | -0.001618891 | 2291 |
| psc.yrs.dur   | <  | 1.916495551 |                |    |             |                    | Missing    |             | -0.00181099  | 2291 |
| psc.yrs.dur   | >= | 1.916495551 | AST.resultn    | =  | Missing     |                    | Missing    |             | -0.00123012  | 2291 |
| psc.yrs.dur   | >= | 1.916495551 | AST.resultn    | <  | 89.5        |                    | Missing    |             | -0.001481351 | 2291 |
| psc.yrs.dur   | >= | 1.916495551 | AST.resultn    | >= | 89.5        | age.yrs            | =          | Missing     | -0.00069751  | 2291 |
| psc.yrs.dur   | >= | 1.916495551 | AST.resultn    | >= | 89.5        | age.yrs            | <          | 47.98083504 | -0.001453145 | 2291 |
| psc.yrs.dur   | >= | 1.916495551 | AST.resultn    | >= | 89.5        | age.yrs            | >=         | 47.98083504 | 0            | 2291 |
| age.yrs       | =  | Missing     |                |    |             |                    | Missing    |             | 0.000945166  | 2292 |
| age.yrs       | <  | 69.76043806 | Sodium.resultn | =  | Missing     |                    | Missing    |             | 0.000422438  | 2292 |
| age.yrs       | <  | 69.76043806 | Sodium.resultn | <  | 136.5       |                    | Missing    |             | 0.000376868  | 2292 |
| age.yrs       | <  | 69.76043806 | Sodium.resultn | >= | 136.5       | PLT.resultn        | =          | Missing     | 0.001171823  | 2292 |
| age.yrs       | <  | 69.76043806 | Sodium.resultn | >= | 136.5       | PLT.resultn        | <          | 268         | 0.002015535  | 2292 |
| age.yrs       | <  | 69.76043806 | Sodium.resultn | >= | 136.5       | PLT.resultn        | >=         | 268         | 0            | 2292 |
| age.yrs       | >= | 69.76043806 |                |    |             |                    | Missing    |             | 0.002845094  | 2292 |
| PLT.resultn   | =  | Missing     |                |    |             |                    | Missing    |             | -0.002316572 | 2293 |
| PLT.resultn   | <  | 173         |                |    |             |                    | Missing    |             | -0.000153091 | 2293 |
| PLT.resultn   | >= | 173         | psc.yrs.dur    | =  | Missing     |                    | Missing    |             | -0.002023417 | 2293 |
| PLT.resultn   | >= | 173         | psc.yrs.dur    | <  | 10.13826146 | psc.yrs.dur        | =          | Missing     | -0.001985476 | 2293 |
| PLT.resultn   | >= | 173         | psc.yrs.dur    | <  | 10.13826146 | psc.yrs.dur        | <          | 7.739904175 | -0.002099823 | 2293 |
| PLT.resultn   | >= | 173         | psc.yrs.dur    | <  | 10.13826146 | psc.yrs.dur        | >=         | 7.739904175 | 0            | 2293 |
| PLT.resultn   | >= | 173         | psc.yrs.dur    | >= | 10.13826146 |                    | Missing    |             | -0.002612966 | 2293 |
| ALK.times.uln | =  | Missing     | TBILL.resultn  | =  | Missing     |                    |            |             | -0.002323501 | 2294 |
| ALK.times.uln | =  | Missing     | TBILL.resultn  | <  | 1.4         |                    |            |             | -0.001621964 | 2294 |
| ALK.times.uln | =  | Missing     | TBILL.resultn  | >= | 1.4         |                    |            |             | 0.000172631  | 2294 |
| ALK.times.uln | <  | 7.878362224 | ALK.times.uln  | =  | Missing     |                    |            |             | -0.001473833 | 2294 |
| ALK.times.uln | <  | 7.878362224 | ALK.times.uln  | <  | 5.462893197 |                    |            |             | -0.001595098 | 2294 |
| ALK.times.uln | <  | 7.878362224 | ALK.times.uln  | >= | 5.462893197 |                    |            |             | 0            | 2294 |

|                    |    |             |                    |    |             |                |    |             |       |              |      |
|--------------------|----|-------------|--------------------|----|-------------|----------------|----|-------------|-------|--------------|------|
| ALK.times.uln      | >= | 7.878362224 |                    |    |             |                |    |             |       | -0.002063507 | 2294 |
| ALK.times.uln      | =  | Missing     | Sodium.resultn     | =  | Missing     |                |    | Missing     |       | -0.003275835 | 2295 |
| ALK.times.uln      | =  | Missing     | Sodium.resultn     | <  | 139.5       |                |    | Missing     |       | -0.00402724  | 2295 |
| ALK.times.uln      | =  | Missing     | Sodium.resultn     | >= | 139.5       | psc.yrs.dur    | =  | Missing     |       | -0.001624163 | 2295 |
| ALK.times.uln      | =  | Missing     | Sodium.resultn     | >= | 139.5       | psc.yrs.dur    | <  | 0.503764545 |       | -0.003248326 | 2295 |
| ALK.times.uln      | =  | Missing     | Sodium.resultn     | >= | 139.5       | psc.yrs.dur    | >= | 0.503764545 |       | 0            | 2295 |
| ALK.times.uln      | <  | 7.4286935   |                    |    |             |                |    | Missing     |       | -0.003254919 | 2295 |
| ALK.times.uln      | >= | 7.4286935   |                    |    |             |                |    | Missing     |       | -0.00391016  | 2295 |
| psc.yrs.dur        | =  | Missing     |                    |    |             |                |    | Missing     |       | -0.00103664  | 2296 |
| psc.yrs.dur        | <  | 10.13826146 | ALK.times.uln      | =  | Missing     |                |    | Missing     |       | -0.001125944 | 2296 |
| psc.yrs.dur        | <  | 10.13826146 | ALK.times.uln      | <  | 5.446215139 | AST.resultn    | =  | Missing     |       | -0.001050828 | 2296 |
| psc.yrs.dur        | <  | 10.13826146 | ALK.times.uln      | <  | 5.446215139 | AST.resultn    | <  |             | 51    | -0.001879128 | 2296 |
| psc.yrs.dur        | <  | 10.13826146 | ALK.times.uln      | <  | 5.446215139 | AST.resultn    | >= |             | 51    | 0            | 2296 |
| psc.yrs.dur        | <  | 10.13826146 | ALK.times.uln      | >= | 5.446215139 |                |    | Missing     |       | 8.59E-05     | 2296 |
| psc.yrs.dur        | >= | 10.13826146 |                    |    |             |                |    | Missing     |       | -0.001591926 | 2296 |
| age.yrs            | =  | Missing     |                    |    |             |                |    | Missing     |       | -0.000453729 | 2297 |
| age.yrs            | <  | 51.58521561 |                    |    |             |                |    | Missing     |       | -0.000723066 | 2297 |
| age.yrs            | >= | 51.58521561 | AST.resultn        | =  | Missing     |                |    | Missing     |       | 0.000111222  | 2297 |
| age.yrs            | >= | 51.58521561 | AST.resultn        | <  | 52.5        |                |    | Missing     |       | -0.001104934 | 2297 |
| age.yrs            | >= | 51.58521561 | AST.resultn        | >= | 52.5        | AST.resultn    | =  | Missing     |       | 0.001491725  | 2297 |
| age.yrs            | >= | 51.58521561 | AST.resultn        | >= | 52.5        | AST.resultn    | <  |             | 72    | 0.003449613  | 2297 |
| age.yrs            | >= | 51.58521561 | AST.resultn        | >= | 52.5        | AST.resultn    | >= |             | 72    | 0            | 2297 |
| TBILL.resultn      | =  | Missing     |                    |    |             |                |    |             |       | 0.003903108  | 2298 |
| TBILL.resultn      | <  | 2.25        | AST.resultn        | =  | Missing     |                |    |             |       | 0.000822596  | 2298 |
| TBILL.resultn      | <  | 2.25        | AST.resultn        | <  | 91.5        |                |    |             |       | 0.001076483  | 2298 |
| TBILL.resultn      | <  | 2.25        | AST.resultn        | >= | 91.5        |                |    |             |       | 0            | 2298 |
| TBILL.resultn      | >= | 2.25        | Hemoglobin.resultn | =  | Missing     |                |    |             |       | 0.001303065  | 2298 |
| TBILL.resultn      | >= | 2.25        | Hemoglobin.resultn | <  | 13.35       |                |    |             |       | 0.001014756  | 2298 |
| TBILL.resultn      | >= | 2.25        | Hemoglobin.resultn | >= | 13.35       |                |    |             |       | 0.001591374  | 2298 |
| Sodium.resultn     | =  | Missing     |                    |    |             |                |    |             |       | -0.000983549 | 2299 |
| Sodium.resultn     | <  | 138.5       | ALK.times.uln      | =  | Missing     |                |    |             |       | -0.000407487 | 2299 |
| Sodium.resultn     | <  | 138.5       | ALK.times.uln      | <  | 2.823748484 |                |    |             |       | -0.000738973 | 2299 |
| Sodium.resultn     | <  | 138.5       | ALK.times.uln      | >= | 2.823748484 |                |    |             |       | 0.001099195  | 2299 |
| Sodium.resultn     | >= | 138.5       | ALB.resultn        | =  | Missing     |                |    |             |       | -0.000921644 | 2299 |
| Sodium.resultn     | >= | 138.5       | ALB.resultn        | <  | 4.25        |                |    |             |       | -0.001305663 | 2299 |
| Sodium.resultn     | >= | 138.5       | ALB.resultn        | >= | 4.25        |                |    |             |       | 0            | 2299 |
| ALB.resultn        | =  | Missing     |                    |    |             |                |    |             |       | -0.000566192 | 2300 |
| ALB.resultn        | <  | 3.105       | TBILL.resultn      | =  | Missing     |                |    |             |       | 0.001451832  | 2300 |
| ALB.resultn        | <  | 3.105       | TBILL.resultn      | <  | 1.31        |                |    |             |       | 0.00101966   | 2300 |
| ALB.resultn        | <  | 3.105       | TBILL.resultn      | >= | 1.31        |                |    |             |       | 0.001927221  | 2300 |
| ALB.resultn        | >= | 3.105       | age.yrs            | =  | Missing     |                |    |             |       | 0.000477338  | 2300 |
| ALB.resultn        | >= | 3.105       | age.yrs            | <  | 32.12867899 |                |    |             |       | 0.002058521  | 2300 |
| ALB.resultn        | >= | 3.105       | age.yrs            | >= | 32.12867899 |                |    |             |       | 0            | 2300 |
| AST.resultn        | =  | Missing     |                    |    |             |                |    | Missing     |       | -0.001423437 | 2301 |
| AST.resultn        | <  | 138.5       | TBILL.resultn      | =  | Missing     |                |    | Missing     |       | -0.000459122 | 2301 |
| AST.resultn        | <  | 138.5       | TBILL.resultn      | <  | 1.31        |                |    | Missing     |       | -0.000641201 | 2301 |
| AST.resultn        | <  | 138.5       | TBILL.resultn      | >= | 1.31        | ALB.resultn    | =  | Missing     |       | 0.000603008  | 2301 |
| AST.resultn        | <  | 138.5       | TBILL.resultn      | >= | 1.31        | ALB.resultn    | <  |             | 3.755 | 0.001045214  | 2301 |
| AST.resultn        | <  | 138.5       | TBILL.resultn      | >= | 1.31        | ALB.resultn    | >= |             | 3.755 | 0            | 2301 |
| AST.resultn        | >= | 138.5       |                    |    |             |                |    | Missing     |       | -0.001117076 | 2301 |
| Hemoglobin.resultn | =  | Missing     |                    |    |             |                |    | Missing     |       | 0.001031266  | 2302 |
| Hemoglobin.resultn | <  | 12.35       |                    |    |             |                |    | Missing     |       | -0.000251613 | 2302 |
| Hemoglobin.resultn | >= | 12.35       | ALK.times.uln      | =  | Missing     |                |    | Missing     |       | -0.000777329 | 2302 |
| Hemoglobin.resultn | >= | 12.35       | ALK.times.uln      | <  | 2.815208295 |                |    | Missing     |       | -0.00081648  | 2302 |
| Hemoglobin.resultn | >= | 12.35       | ALK.times.uln      | >= | 2.815208295 | Sodium.resultn | =  | Missing     |       | 0.001227595  | 2302 |
| Hemoglobin.resultn | >= | 12.35       | ALK.times.uln      | >= | 2.815208295 | Sodium.resultn | <  |             | 138.5 | 0.002966689  | 2302 |
| Hemoglobin.resultn | >= | 12.35       | ALK.times.uln      | >= | 2.815208295 | Sodium.resultn | >= |             | 138.5 | 0            | 2302 |
| age.yrs            | =  | Missing     |                    |    |             |                |    | Missing     |       | -0.001170443 | 2303 |
| age.yrs            | <  | 54.39972621 |                    |    |             |                |    | Missing     |       | -0.001433311 | 2303 |
| age.yrs            | >= | 54.39972621 | TBILL.resultn      | =  | Missing     |                |    | Missing     |       | -0.000421668 | 2303 |
| age.yrs            | >= | 54.39972621 | TBILL.resultn      | <  | 1.65        | ALB.resultn    | =  | Missing     |       | -0.000664592 | 2303 |
| age.yrs            | >= | 54.39972621 | TBILL.resultn      | <  | 1.65        | ALB.resultn    | <  |             | 4.05  | -0.00147366  | 2303 |

|               |    |             |                    |    |             |               |         |             |              |      |
|---------------|----|-------------|--------------------|----|-------------|---------------|---------|-------------|--------------|------|
| age.yrs       | >= | 54.39972621 | TBILL.resultn      | <  | 1.65        | ALB.resultn   | >=      | 4.05        | 0            | 2303 |
| age.yrs       | >= | 54.39972621 | TBILL.resultn      | >= | 1.65        |               | Missing |             | 0.000841533  | 2303 |
| PLT.resultn   | =  | Missing     |                    |    |             |               |         |             | 1.16E-05     | 2304 |
| PLT.resultn   | <  | 209.5       | ALK.times.uln      | =  | Missing     |               |         |             | 0.001558607  | 2304 |
| PLT.resultn   | <  | 209.5       | ALK.times.uln      | <  | 2.823748484 |               |         |             | -0.000477234 | 2304 |
| PLT.resultn   | <  | 209.5       | ALK.times.uln      | >= | 2.823748484 |               |         |             | 0.002010558  | 2304 |
| PLT.resultn   | >= | 209.5       | AST.resultn        | =  | Missing     |               |         |             | 0.000549644  | 2304 |
| PLT.resultn   | >= | 209.5       | AST.resultn        | <  | 70.5        |               |         |             | 0.000851219  | 2304 |
| PLT.resultn   | >= | 209.5       | AST.resultn        | >= | 70.5        |               |         |             | 0            | 2304 |
| age.yrs       | =  | Missing     |                    |    |             |               | Missing |             | 4.99E-05     | 2305 |
| age.yrs       | <  | 63.31143053 | ALB.resultn        | =  | Missing     |               | Missing |             | -0.000977887 | 2305 |
| age.yrs       | <  | 63.31143053 | ALB.resultn        | <  | 2.915       |               | Missing |             | 0.000547527  | 2305 |
| age.yrs       | <  | 63.31143053 | ALB.resultn        | >= | 2.915       | ALB.resultn   | =       | Missing     | -2.11E-05    | 2305 |
| age.yrs       | <  | 63.31143053 | ALB.resultn        | >= | 2.915       | ALB.resultn   | <       | 3.18        | -0.000418039 | 2305 |
| age.yrs       | <  | 63.31143053 | ALB.resultn        | >= | 2.915       | ALB.resultn   | >=      | 3.18        | 0            | 2305 |
| age.yrs       | >= | 63.31143053 |                    |    |             |               | Missing |             | 0.001763411  | 2305 |
| ALK.times.uln | =  | Missing     | ALB.resultn        | =  | Missing     |               |         |             | -0.002015849 | 2306 |
| ALK.times.uln | =  | Missing     | ALB.resultn        | <  | 3.95        |               |         |             | -0.000296885 | 2306 |
| ALK.times.uln | =  | Missing     | ALB.resultn        | >= | 3.95        |               |         |             | -0.002006791 | 2306 |
| ALK.times.uln | <  | 7.534327303 | TBILL.resultn      | =  | Missing     |               |         |             | -0.001051643 | 2306 |
| ALK.times.uln | <  | 7.534327303 | TBILL.resultn      | <  | 2           |               |         |             | -0.00114309  | 2306 |
| ALK.times.uln | <  | 7.534327303 | TBILL.resultn      | >= | 2           |               |         |             | 0            | 2306 |
| ALK.times.uln | >= | 7.534327303 |                    |    |             |               |         |             | -0.001510281 | 2306 |
| PLT.resultn   | =  | Missing     |                    |    |             |               | Missing |             | -0.002727767 | 2307 |
| PLT.resultn   | <  | 249.5       | ALK.times.uln      | =  | Missing     | age.yrs       | =       | Missing     | -0.001823223 | 2307 |
| PLT.resultn   | <  | 249.5       | ALK.times.uln      | =  | Missing     | age.yrs       | <       | 53.18001369 | -0.003342575 | 2307 |
| PLT.resultn   | <  | 249.5       | ALK.times.uln      | =  | Missing     | age.yrs       | >=      | 53.18001369 | 0            | 2307 |
| PLT.resultn   | <  | 249.5       | ALK.times.uln      | <  | 2.85059761  |               | Missing |             | -0.003425348 | 2307 |
| PLT.resultn   | <  | 249.5       | ALK.times.uln      | >= | 2.85059761  |               | Missing |             | 0.000305679  | 2307 |
| PLT.resultn   | >= | 249.5       |                    |    |             |               | Missing |             | -0.003074817 | 2307 |
| psc.yrs.dur   | =  | Missing     |                    |    |             |               | Missing |             | -0.002506065 | 2308 |
| psc.yrs.dur   | <  | 2.047912389 |                    |    |             |               | Missing |             | -0.002773759 | 2308 |
| psc.yrs.dur   | >= | 2.047912389 | AST.resultn        | =  | Missing     |               | Missing |             | -0.00192383  | 2308 |
| psc.yrs.dur   | >= | 2.047912389 | AST.resultn        | <  | 88          |               | Missing |             | -0.002259368 | 2308 |
| psc.yrs.dur   | >= | 2.047912389 | AST.resultn        | >= | 88          | age.yrs       | =       | Missing     | -0.001029062 | 2308 |
| psc.yrs.dur   | >= | 2.047912389 | AST.resultn        | >= | 88          | age.yrs       | <       | 46.13826146 | -0.001964573 | 2308 |
| psc.yrs.dur   | >= | 2.047912389 | AST.resultn        | >= | 88          | age.yrs       | >=      | 46.13826146 | 0            | 2308 |
| TBILL.resultn | =  | Missing     |                    |    |             |               | Missing |             | -0.001073788 | 2309 |
| TBILL.resultn | <  | 3.95        | age.yrs            | =  | Missing     |               | Missing |             | -0.0001604   | 2309 |
| TBILL.resultn | <  | 3.95        | age.yrs            | <  | 64.89253936 | ALK.times.uln | =       | Missing     | 0            | 2309 |
| TBILL.resultn | <  | 3.95        | age.yrs            | <  | 64.89253936 | ALK.times.uln | <       | 6.046948357 | -0.000463431 | 2309 |
| TBILL.resultn | <  | 3.95        | age.yrs            | <  | 64.89253936 | ALK.times.uln | >=      | 6.046948357 | -0.000700569 | 2309 |
| TBILL.resultn | <  | 3.95        | age.yrs            | >= | 64.89253936 |               | Missing |             | 0.002052836  | 2309 |
| TBILL.resultn | >= | 3.95        |                    |    |             |               | Missing |             | 0.001067582  | 2309 |
| ALK.times.uln | =  | Missing     | TBILL.resultn      | =  | Missing     |               |         |             | -0.0006464   | 2310 |
| ALK.times.uln | =  | Missing     | TBILL.resultn      | <  | 1.31        |               |         |             | -0.001029206 | 2310 |
| ALK.times.uln | =  | Missing     | TBILL.resultn      | >= | 1.31        |               |         |             | 0.000425455  | 2310 |
| ALK.times.uln | <  | 5.336800235 | TBILL.resultn      | =  | Missing     |               |         |             | -0.000688079 | 2310 |
| ALK.times.uln | <  | 5.336800235 | TBILL.resultn      | <  | 1.65        |               |         |             | -0.000788998 | 2310 |
| ALK.times.uln | <  | 5.336800235 | TBILL.resultn      | >= | 1.65        |               |         |             | 0            | 2310 |
| ALK.times.uln | >= | 5.336800235 |                    |    |             |               |         |             | 0.000403202  | 2310 |
| age.yrs       | =  | Missing     |                    |    |             |               | Missing |             | 0.000789149  | 2311 |
| age.yrs       | <  | 68.91718001 | Hemoglobin.resultn | =  | Missing     | ALB.resultn   | =       | Missing     | 0            | 2311 |
| age.yrs       | <  | 68.91718001 | Hemoglobin.resultn | =  | Missing     | ALB.resultn   | <       | 3.95        | 0.002012315  | 2311 |
| age.yrs       | <  | 68.91718001 | Hemoglobin.resultn | =  | Missing     | ALB.resultn   | >=      | 3.95        | 0.00118143   | 2311 |
| age.yrs       | <  | 68.91718001 | Hemoglobin.resultn | <  | 11.55       |               | Missing |             | 0.000647231  | 2311 |
| age.yrs       | <  | 68.91718001 | Hemoglobin.resultn | >= | 11.55       |               | Missing |             | 0.000535677  | 2311 |
| age.yrs       | >= | 68.91718001 |                    |    |             |               | Missing |             | 0.00253827   | 2311 |
| PLT.resultn   | =  | Missing     |                    |    |             |               |         |             | 0.000284663  | 2312 |
| PLT.resultn   | <  | 195.5       | TBILL.resultn      | =  | Missing     |               |         |             | 0.001176397  | 2312 |
| PLT.resultn   | <  | 195.5       | TBILL.resultn      | <  | 0.85        |               |         |             | -0.000354663 | 2312 |
| PLT.resultn   | <  | 195.5       | TBILL.resultn      | >= | 0.85        |               |         |             | 0.002379373  | 2312 |

|                    |    |             |                    |    |             |               |         |              |              |      |
|--------------------|----|-------------|--------------------|----|-------------|---------------|---------|--------------|--------------|------|
| PLT.resultn        | >= | 195.5       | TBILL.resultn      | =  | Missing     |               |         | 0.000557539  | 2312         |      |
| PLT.resultn        | >= | 195.5       | TBILL.resultn      | <  | 3.15        |               |         | 0.000588006  | 2312         |      |
| PLT.resultn        | >= | 195.5       | TBILL.resultn      | >= | 3.15        |               |         | 0            | 2312         |      |
| ALK.times.uln      | =  | Missing     | PLT.resultn        | =  | Missing     |               |         | 0            | 2313         |      |
| ALK.times.uln      | =  | Missing     | PLT.resultn        | <  | 209.5       |               |         | -0.001223513 | 2313         |      |
| ALK.times.uln      | =  | Missing     | PLT.resultn        | >= | 209.5       |               |         | -9.06E-05    | 2313         |      |
| ALK.times.uln      | <  | 7.868810472 | ALK.times.uln      | =  | Missing     |               |         | -0.000350599 | 2313         |      |
| ALK.times.uln      | <  | 7.868810472 | ALK.times.uln      | <  | 5.943877551 |               |         | -0.000438911 | 2313         |      |
| ALK.times.uln      | <  | 7.868810472 | ALK.times.uln      | >= | 5.943877551 |               |         | 0.00112421   | 2313         |      |
| ALK.times.uln      | >= | 7.868810472 |                    |    |             |               |         | -0.001183367 | 2313         |      |
| ALK.times.uln      | =  | Missing     | TBILL.resultn      | =  | Missing     |               |         | -0.002374532 | 2314         |      |
| ALK.times.uln      | =  | Missing     | TBILL.resultn      | <  | 1.31        |               |         | -0.001936746 | 2314         |      |
| ALK.times.uln      | =  | Missing     | TBILL.resultn      | >= | 1.31        |               |         | 0.000246942  | 2314         |      |
| ALK.times.uln      | <  | 7.861978174 | ALK.times.uln      | =  | Missing     |               |         | -0.001343904 | 2314         |      |
| ALK.times.uln      | <  | 7.861978174 | ALK.times.uln      | <  | 5.340833404 |               |         | -0.001425849 | 2314         |      |
| ALK.times.uln      | <  | 7.861978174 | ALK.times.uln      | >= | 5.340833404 |               |         | 0            | 2314         |      |
| ALK.times.uln      | >= | 7.861978174 |                    |    |             |               |         | -0.001828239 | 2314         |      |
| psc.yrs.dur        | =  | Missing     |                    |    |             |               |         | -0.000215403 | 2315         |      |
| psc.yrs.dur        | <  | 8.020533881 | TBILL.resultn      | =  | Missing     |               |         | 0            | 2315         |      |
| psc.yrs.dur        | <  | 8.020533881 | TBILL.resultn      | <  | 3.15        |               |         | -0.000259629 | 2315         |      |
| psc.yrs.dur        | <  | 8.020533881 | TBILL.resultn      | >= | 3.15        |               |         | -0.000685145 | 2315         |      |
| psc.yrs.dur        | >= | 8.020533881 | TBILL.resultn      | =  | Missing     |               |         | 0.00025537   | 2315         |      |
| psc.yrs.dur        | >= | 8.020533881 | TBILL.resultn      | <  | 0.85        |               |         | -0.00122083  | 2315         |      |
| psc.yrs.dur        | >= | 8.020533881 | TBILL.resultn      | >= | 0.85        |               |         | 0.001977603  | 2315         |      |
| ALK.times.uln      | =  | Missing     | psc.yrs.dur        | =  | Missing     |               | Missing | 0.000870309  | 2316         |      |
| ALK.times.uln      | =  | Missing     | psc.yrs.dur        | <  | 6.410677618 | AST.resultn   | =       | Missing      | 0.000452271  | 2316 |
| ALK.times.uln      | =  | Missing     | psc.yrs.dur        | <  | 6.410677618 | AST.resultn   | <       | 80.5         | 0.000685701  | 2316 |
| ALK.times.uln      | =  | Missing     | psc.yrs.dur        | <  | 6.410677618 | AST.resultn   | >=      | 80.5         | 0            | 2316 |
| ALK.times.uln      | =  | Missing     | psc.yrs.dur        | >= | 6.410677618 |               | Missing | 0.002478147  | 2316         |      |
| ALK.times.uln      | <  | 5.973260021 |                    |    |             |               | Missing | -6.61E-05    | 2316         |      |
| ALK.times.uln      | >= | 5.973260021 |                    |    |             |               | Missing | 0.001449344  | 2316         |      |
| AST.resultn        | =  | Missing     |                    |    |             |               |         | 0.000954869  | 2317         |      |
| AST.resultn        | <  | 72.5        | Sodium.resultn     | =  | Missing     |               |         | 0.00090657   | 2317         |      |
| AST.resultn        | <  | 72.5        | Sodium.resultn     | <  | 137.5       |               |         | 0.003949043  | 2317         |      |
| AST.resultn        | <  | 72.5        | Sodium.resultn     | >= | 137.5       |               |         | 0.000867803  | 2317         |      |
| AST.resultn        | >= | 72.5        | age.yrs            | =  | Missing     |               |         | 0.00041835   | 2317         |      |
| AST.resultn        | >= | 72.5        | age.yrs            | <  | 52.92402464 |               |         | 0.000498582  | 2317         |      |
| AST.resultn        | >= | 72.5        | age.yrs            | >= | 52.92402464 |               |         | 0            | 2317         |      |
| psc.yrs.dur        | =  | Missing     |                    |    |             |               |         | -0.001128886 | 2318         |      |
| psc.yrs.dur        | <  | 1.336071184 | TBILL.resultn      | =  | Missing     |               |         | -0.001366445 | 2318         |      |
| psc.yrs.dur        | <  | 1.336071184 | TBILL.resultn      | <  | 2.55        |               |         | -0.001340397 | 2318         |      |
| psc.yrs.dur        | <  | 1.336071184 | TBILL.resultn      | >= | 2.55        |               |         | -0.001754561 | 2318         |      |
| psc.yrs.dur        | >= | 1.336071184 | ALK.times.uln      | =  | Missing     |               |         | 0            | 2318         |      |
| psc.yrs.dur        | >= | 1.336071184 | ALK.times.uln      | <  | 2.781735492 |               |         | -0.001604574 | 2318         |      |
| psc.yrs.dur        | >= | 1.336071184 | ALK.times.uln      | >= | 2.781735492 |               |         | 0.000138545  | 2318         |      |
| Hemoglobin.resultn | =  | Missing     | ALB.resultn        | =  | Missing     |               |         | -0.001898692 | 2319         |      |
| Hemoglobin.resultn | =  | Missing     | ALB.resultn        | <  | 3.95        |               |         | 0.001096107  | 2319         |      |
| Hemoglobin.resultn | =  | Missing     | ALB.resultn        | >= | 3.95        |               |         | -0.001862217 | 2319         |      |
| Hemoglobin.resultn | <  | 11.95       |                    |    |             |               |         | -0.001398461 | 2319         |      |
| Hemoglobin.resultn | >= | 11.95       | TBILL.resultn      | =  | Missing     |               |         | -0.000855359 | 2319         |      |
| Hemoglobin.resultn | >= | 11.95       | TBILL.resultn      | <  | 2.05        |               |         | -0.000941469 | 2319         |      |
| Hemoglobin.resultn | >= | 11.95       | TBILL.resultn      | >= | 2.05        |               |         | 0            | 2319         |      |
| age.yrs            | =  | Missing     |                    |    |             |               | Missing | 0.000889121  | 2320         |      |
| age.yrs            | <  | 69.84257358 | Hemoglobin.resultn | =  | Missing     |               | Missing | 0.001070946  | 2320         |      |
| age.yrs            | <  | 69.84257358 | Hemoglobin.resultn | <  | 11.35       |               | Missing | 0.000639593  | 2320         |      |
| age.yrs            | <  | 69.84257358 | Hemoglobin.resultn | >= | 11.35       | ALK.times.uln | =       | Missing      | 0            | 2320 |
| age.yrs            | <  | 69.84257358 | Hemoglobin.resultn | >= | 11.35       | ALK.times.uln | <       | 5.90438247   | 0.000563748  | 2320 |
| age.yrs            | <  | 69.84257358 | Hemoglobin.resultn | >= | 11.35       | ALK.times.uln | >=      | 5.90438247   | 0.00238349   | 2320 |
| age.yrs            | >= | 69.84257358 |                    |    |             |               | Missing | 0.003701459  | 2320         |      |
| ALB.resultn        | =  | Missing     |                    |    |             |               | Missing | -0.002056047 | 2321         |      |
| ALB.resultn        | <  | 3.03        |                    |    |             |               | Missing | -0.000887981 | 2321         |      |
| ALB.resultn        | >= | 3.03        | Hemoglobin.resultn | =  | Missing     | TBILL.resultn | =       | Missing      | -0.001656511 | 2321 |

|                |    |                           |               |                     |                  |             |         |              |      |
|----------------|----|---------------------------|---------------|---------------------|------------------|-------------|---------|--------------|------|
| ALB.resultn    | >= | 3.03 Hemoglobin.resultn   | =             | Missing             | TBILI.resultn    | <           | 0.95    | -0.002710654 | 2321 |
| ALB.resultn    | >= | 3.03 Hemoglobin.resultn   | =             | Missing             | TBILI.resultn    | >=          | 0.95    | 0            | 2321 |
| ALB.resultn    | >= | 3.03 Hemoglobin.resultn   | <             | 11.95               | Missing          |             |         | -0.002378827 | 2321 |
| ALB.resultn    | >= | 3.03 Hemoglobin.resultn   | >=            | 11.95               | Missing          |             |         | -0.002060076 | 2321 |
| ALB.resultn    | =  | Missing                   |               |                     | Missing          |             |         | 0.000138303  | 2322 |
| ALB.resultn    | <  | 2.875                     |               |                     | Missing          |             |         | 0.001172883  | 2322 |
| ALB.resultn    | >= | 2.875 ALB.resultn         | =             | Missing             | Missing          |             |         | -0.000135261 | 2322 |
| ALB.resultn    | >= | 2.875 ALB.resultn         | <             | 3.135               | Missing          |             |         | -0.000502834 | 2322 |
| ALB.resultn    | >= | 2.875 ALB.resultn         | >=            | 3.135 ALK.times.uln | =                | Missing     |         | 0            | 2322 |
| ALB.resultn    | >= | 2.875 ALB.resultn         | >=            | 3.135 ALK.times.uln | <                | 2.822501299 |         | -0.000780861 | 2322 |
| ALB.resultn    | >= | 2.875 ALB.resultn         | >=            | 3.135 ALK.times.uln | >=               | 2.822501299 |         | 0.001262975  | 2322 |
| Sodium.resultn | =  | Missing                   |               |                     |                  |             |         | -0.001969605 | 2323 |
| Sodium.resultn | <  | 138.5 ALK.times.uln       | =             | Missing             |                  |             |         | -0.001434091 | 2323 |
| Sodium.resultn | <  | 138.5 ALK.times.uln       | <             | 2.795652174         |                  |             |         | -0.001278404 | 2323 |
| Sodium.resultn | <  | 138.5 ALK.times.uln       | >=            | 2.795652174         |                  |             |         | 0.000648557  | 2323 |
| Sodium.resultn | >= | 138.5 ALK.times.uln       | =             | Missing             |                  |             |         | 0            | 2323 |
| Sodium.resultn | >= | 138.5 ALK.times.uln       | <             | 4.865615798         |                  |             |         | -0.002312518 | 2323 |
| Sodium.resultn | >= | 138.5 ALK.times.uln       | >=            | 4.865615798         |                  |             |         | -0.002277718 | 2323 |
| age.yrs        | =  | Missing                   |               |                     | Missing          |             |         | 0.000205236  | 2324 |
| age.yrs        | <  | 69.84257358 PLT.resultn   | =             | Missing             | Missing          |             |         | 6.54E-05     | 2324 |
| age.yrs        | <  | 69.84257358 PLT.resultn   | <             | 184                 | Missing          |             |         | -0.000443241 | 2324 |
| age.yrs        | <  | 69.84257358 PLT.resultn   | >=            | 184 PLT.resultn     | =                | Missing     |         | 0.000161651  | 2324 |
| age.yrs        | <  | 69.84257358 PLT.resultn   | >=            | 184 PLT.resultn     | <                | 195.5       |         | 0.002599889  | 2324 |
| age.yrs        | <  | 69.84257358 PLT.resultn   | >=            | 184 PLT.resultn     | >=               | 195.5       |         | 0            | 2324 |
| age.yrs        | >= | 69.84257358               |               |                     | Missing          |             |         | 0.001955394  | 2324 |
| ALB.resultn    | =  | Missing                   | psc.yrs.dur   | =                   | Missing          |             |         | 0.001322457  | 2325 |
| ALB.resultn    | =  | Missing                   | psc.yrs.dur   | <                   | 0.101300479      |             |         | 0.004231862  | 2325 |
| ALB.resultn    | =  | Missing                   | psc.yrs.dur   | >=                  | 0.101300479      |             |         | 0            | 2325 |
| ALB.resultn    | <  | 3.31 psc.yrs.dur          | =             | Missing             |                  |             |         | 0.001419042  | 2325 |
| ALB.resultn    | <  | 3.31 psc.yrs.dur          | <             | 2.67761807          |                  |             |         | 0.000850148  | 2325 |
| ALB.resultn    | <  | 3.31 psc.yrs.dur          | >=            | 2.67761807          |                  |             |         | 0.002386163  | 2325 |
| ALB.resultn    | >= | 3.31                      |               |                     |                  |             |         | 0.000620887  | 2325 |
| ALK.times.uln  | =  | Missing                   |               |                     |                  | Missing     |         | 0.000523092  | 2326 |
| ALK.times.uln  | <  | 3.635579421               |               |                     |                  | Missing     |         | 0.000153364  | 2326 |
| ALK.times.uln  | >= | 3.635579421 AST.resultn   | =             | Missing             |                  | Missing     |         | 0.002044191  | 2326 |
| ALK.times.uln  | >= | 3.635579421 AST.resultn   | <             | 80                  |                  | Missing     |         | 0.004307316  | 2326 |
| ALK.times.uln  | >= | 3.635579421 AST.resultn   | >=            | 80 PLT.resultn      | =                | Missing     |         | 0.000999672  | 2326 |
| ALK.times.uln  | >= | 3.635579421 AST.resultn   | >=            | 80 PLT.resultn      | <                | 268         |         | 0.00208265   | 2326 |
| ALK.times.uln  | >= | 3.635579421 AST.resultn   | >=            | 80 PLT.resultn      | >=               | 268         |         | 0            | 2326 |
| ALB.resultn    | =  | Missing                   |               |                     |                  |             |         | -0.001652423 | 2327 |
| ALB.resultn    | <  | 3.33 ALK.times.uln        | =             | Missing             |                  |             |         | 0.000233705  | 2327 |
| ALB.resultn    | <  | 3.33 ALK.times.uln        | <             | 3.217391304         |                  |             |         | -0.000636636 | 2327 |
| ALB.resultn    | <  | 3.33 ALK.times.uln        | >=            | 3.217391304         |                  |             |         | 0.001104046  | 2327 |
| ALB.resultn    | >= | 3.33 Hemoglobin.resultn   | =             | Missing             |                  |             |         | 0            | 2327 |
| ALB.resultn    | >= | 3.33 Hemoglobin.resultn   | <             | 14.85               |                  |             |         | -0.001643545 | 2327 |
| ALB.resultn    | >= | 3.33 Hemoglobin.resultn   | >=            | 14.85               |                  |             |         | -0.000465252 | 2327 |
| ALK.times.uln  | =  | Missing                   | TBILI.resultn | =                   | Missing          |             | Missing | -0.002157151 | 2328 |
| ALK.times.uln  | =  | Missing                   | TBILI.resultn | <                   | 1.31 ALB.resultn | =           | Missing | -0.001514518 | 2328 |
| ALK.times.uln  | =  | Missing                   | TBILI.resultn | <                   | 1.31 ALB.resultn | <           | 4.35    | -0.002187637 | 2328 |
| ALK.times.uln  | =  | Missing                   | TBILI.resultn | <                   | 1.31 ALB.resultn | >=          | 4.35    | 0            | 2328 |
| ALK.times.uln  | =  | Missing                   | TBILI.resultn | >=                  | 1.31             |             | Missing | -0.000239192 | 2328 |
| ALK.times.uln  | <  | 5.965616681               |               |                     |                  |             | Missing | -0.001588849 | 2328 |
| ALK.times.uln  | >= | 5.965616681               |               |                     |                  |             | Missing | -0.000736514 | 2328 |
| psc.yrs.dur    | =  | Missing                   |               |                     |                  |             |         | -0.001672415 | 2329 |
| psc.yrs.dur    | <  | 6.592744695 TBILI.resultn | =             | Missing             |                  |             |         | 0            | 2329 |
| psc.yrs.dur    | <  | 6.592744695 TBILI.resultn | <             | 3.1                 |                  |             |         | -0.001813259 | 2329 |
| psc.yrs.dur    | <  | 6.592744695 TBILI.resultn | >=            | 3.1                 |                  |             |         | -0.002277931 | 2329 |
| psc.yrs.dur    | >= | 6.592744695 AST.resultn   | =             | Missing             |                  |             |         | -0.001294872 | 2329 |
| psc.yrs.dur    | >= | 6.592744695 AST.resultn   | <             | 47.5                |                  |             |         | -0.002578448 | 2329 |
| psc.yrs.dur    | >= | 6.592744695 AST.resultn   | >=            | 47.5                |                  |             |         | -1.13E-05    | 2329 |
| Sodium.resultn | =  | Missing                   |               |                     |                  | Missing     |         | 0.00010743   | 2330 |
| Sodium.resultn | <  | 136.5                     |               |                     |                  | Missing     |         | 0.00132701   | 2330 |



|                |    |                           |    |                         |    |             |              |      |
|----------------|----|---------------------------|----|-------------------------|----|-------------|--------------|------|
| Sodium.resultn | >= | 136.5 age.yrs             | =  | Missing                 |    | Missing     | 0.000211382  | 2330 |
| Sodium.resultn | >= | 136.5 age.yrs             | <  | 68.49281314 ALB.resultn | =  | Missing     | -1.43E-05    | 2330 |
| Sodium.resultn | >= | 136.5 age.yrs             | <  | 68.49281314 ALB.resultn | <  | 3.13        | -0.000178626 | 2330 |
| Sodium.resultn | >= | 136.5 age.yrs             | <  | 68.49281314 ALB.resultn | >= | 3.13        | 0            | 2330 |
| Sodium.resultn | >= | 136.5 age.yrs             | >= | 68.49281314             |    | Missing     | 0.003439236  | 2330 |
| TBILL.resultn  | =  | Missing                   |    |                         |    | Missing     | -0.002533628 | 2331 |
| TBILL.resultn  | <  | 3.1 ALK.times.uln         | =  | Missing age.yrs         | =  | Missing     | -0.001462708 | 2331 |
| TBILL.resultn  | <  | 3.1 ALK.times.uln         | =  | Missing age.yrs         | <  | 50.98151951 | -0.002471472 | 2331 |
| TBILL.resultn  | <  | 3.1 ALK.times.uln         | =  | Missing age.yrs         | >= | 50.98151951 | 0            | 2331 |
| TBILL.resultn  | <  | 3.1 ALK.times.uln         | <  | 5.462893197             |    | Missing     | -0.001826252 | 2331 |
| TBILL.resultn  | <  | 3.1 ALK.times.uln         | >= | 5.462893197             |    | Missing     | -0.000669843 | 2331 |
| TBILL.resultn  | >= | 3.1                       |    |                         |    | Missing     | -0.002205171 | 2331 |
| AST.resultn    | =  | Missing                   |    |                         |    | Missing     | -0.002724721 | 2332 |
| AST.resultn    | <  | 139.5 TBILL.resultn       | =  | Missing                 |    | Missing     | -0.001623864 | 2332 |
| AST.resultn    | <  | 139.5 TBILL.resultn       | <  | 1.65                    |    | Missing     | -0.001715843 | 2332 |
| AST.resultn    | <  | 139.5 TBILL.resultn       | >= | 1.65 age.yrs            | =  | Missing     | -0.000813572 | 2332 |
| AST.resultn    | <  | 139.5 TBILL.resultn       | >= | 1.65 age.yrs            | <  | 47.59069131 | -0.001553183 | 2332 |
| AST.resultn    | <  | 139.5 TBILL.resultn       | >= | 1.65 age.yrs            | >= | 47.59069131 | 0            | 2332 |
| AST.resultn    | >= | 139.5                     |    |                         |    | Missing     | -0.002159267 | 2332 |
| Sodium.resultn | =  | Missing                   |    |                         |    | Missing     | -0.002778327 | 2333 |
| Sodium.resultn | <  | 136.5                     |    |                         |    | Missing     | -0.001774035 | 2333 |
| Sodium.resultn | >= | 136.5 Hemoglobin.resultn  | =  | Missing psc.yrs.dur     | =  | Missing     | -0.002021963 | 2333 |
| Sodium.resultn | >= | 136.5 Hemoglobin.resultn  | =  | Missing psc.yrs.dur     | <  | 0.735112936 | -0.003831087 | 2333 |
| Sodium.resultn | >= | 136.5 Hemoglobin.resultn  | =  | Missing psc.yrs.dur     | >= | 0.735112936 | 0            | 2333 |
| Sodium.resultn | >= | 136.5 Hemoglobin.resultn  | <  | 12.15                   |    | Missing     | -0.003213231 | 2333 |
| Sodium.resultn | >= | 136.5 Hemoglobin.resultn  | >= | 12.15                   |    | Missing     | -0.003560713 | 2333 |
| psc.yrs.dur    | =  | Missing                   |    |                         |    |             | -5.14E-05    | 2334 |
| psc.yrs.dur    | <  | 6.258726899 ALK.times.uln | =  | Missing                 |    |             | 0            | 2334 |
| psc.yrs.dur    | <  | 6.258726899 ALK.times.uln | <  | 4.399930889             |    |             | -0.000482544 | 2334 |
| psc.yrs.dur    | <  | 6.258726899 ALK.times.uln | >= | 4.399930889             |    |             | 0.000955862  | 2334 |
| psc.yrs.dur    | >= | 6.258726899 AST.resultn   | =  | Missing                 |    |             | 0.000674126  | 2334 |
| psc.yrs.dur    | >= | 6.258726899 AST.resultn   | <  | 70.5                    |    |             | 0.000198039  | 2334 |
| psc.yrs.dur    | >= | 6.258726899 AST.resultn   | >= | 70.5                    |    |             | 0.001507278  | 2334 |
| ALB.resultn    | =  | Missing                   |    |                         |    | Missing     | -0.002721894 | 2335 |
| ALB.resultn    | <  | 2.95                      |    |                         |    | Missing     | -0.000575997 | 2335 |
| ALB.resultn    | >= | 2.95 TBILL.resultn        | =  | Missing                 |    | Missing     | -0.001878283 | 2335 |
| ALB.resultn    | >= | 2.95 TBILL.resultn        | <  | 2.55 age.yrs            | =  | Missing     | -0.001846772 | 2335 |
| ALB.resultn    | >= | 2.95 TBILL.resultn        | <  | 2.55 age.yrs            | <  | 69.70978782 | -0.001941966 | 2335 |
| ALB.resultn    | >= | 2.95 TBILL.resultn        | <  | 2.55 age.yrs            | >= | 69.70978782 | 0            | 2335 |
| ALB.resultn    | >= | 2.95 TBILL.resultn        | >= | 2.55                    |    | Missing     | -0.00233745  | 2335 |
| ALB.resultn    | =  | Missing                   |    |                         |    | Missing     | 0.000289883  | 2336 |
| ALB.resultn    | <  | 2.915                     |    |                         |    | Missing     | 0.001051932  | 2336 |
| ALB.resultn    | >= | 2.915 psc.yrs.dur         | =  | Missing                 |    | Missing     | 6.44E-05     | 2336 |
| ALB.resultn    | >= | 2.915 psc.yrs.dur         | <  | 13.35523614 ALB.resultn | =  | Missing     | -1.81E-05    | 2336 |
| ALB.resultn    | >= | 2.915 psc.yrs.dur         | <  | 13.35523614 ALB.resultn | <  | 3.25        | -0.000378817 | 2336 |
| ALB.resultn    | >= | 2.915 psc.yrs.dur         | <  | 13.35523614 ALB.resultn | >= | 3.25        | 0            | 2336 |
| ALB.resultn    | >= | 2.915 psc.yrs.dur         | >= | 13.35523614             |    | Missing     | 0.00178926   | 2336 |
| age.yrs        | =  | Missing                   |    |                         |    | Missing     | -0.004930591 | 2337 |
| age.yrs        | <  | 56.79671458               |    |                         |    | Missing     | -0.005185939 | 2337 |
| age.yrs        | >= | 56.79671458 AST.resultn   | =  | Missing                 |    | Missing     | -0.004027752 | 2337 |
| age.yrs        | >= | 56.79671458 AST.resultn   | <  | 51.5                    |    | Missing     | -0.005651854 | 2337 |
| age.yrs        | >= | 56.79671458 AST.resultn   | >= | 51.5 PLT.resultn        | =  | Missing     | -0.002216254 | 2337 |
| age.yrs        | >= | 56.79671458 AST.resultn   | >= | 51.5 PLT.resultn        | <  | 236.5       | -0.004432509 | 2337 |
| age.yrs        | >= | 56.79671458 AST.resultn   | >= | 51.5 PLT.resultn        | >= | 236.5       | 0            | 2337 |
| ALB.resultn    | =  | Missing                   |    |                         |    |             | -0.000766003 | 2338 |
| ALB.resultn    | <  | 3.35 TBILL.resultn        | =  | Missing                 |    |             | 0.00058049   | 2338 |
| ALB.resultn    | <  | 3.35 TBILL.resultn        | <  | 1.31                    |    |             | 0.000108273  | 2338 |
| ALB.resultn    | <  | 3.35 TBILL.resultn        | >= | 1.31                    |    |             | 0.001210113  | 2338 |
| ALB.resultn    | >= | 3.35 ALK.times.uln        | =  | Missing                 |    |             | 0            | 2338 |
| ALB.resultn    | >= | 3.35 ALK.times.uln        | <  | 5.462893197             |    |             | -0.000248212 | 2338 |
| ALB.resultn    | >= | 3.35 ALK.times.uln        | >= | 5.462893197             |    |             | 0.000803907  | 2338 |
| ALB.resultn    | =  | Missing                   |    |                         |    | Missing     | -0.00158906  | 2339 |

|                    |    |                            |               |                          |               |         |              |                   |
|--------------------|----|----------------------------|---------------|--------------------------|---------------|---------|--------------|-------------------|
| ALB.resultn        | <  | 2.915                      |               |                          |               | Missing | -0.00015793  | 2339              |
| ALB.resultn        | >= | 2.915 Hemoglobin.resultn   | =             | Missing                  | TBILI.resultn | =       | Missing      | -0.001292438 2339 |
| ALB.resultn        | >= | 2.915 Hemoglobin.resultn   | =             | Missing                  | TBILI.resultn | <       | 0.75         | -0.002261766 2339 |
| ALB.resultn        | >= | 2.915 Hemoglobin.resultn   | =             | Missing                  | TBILI.resultn | >=      | 0.75         | 0 2339            |
| ALB.resultn        | >= | 2.915 Hemoglobin.resultn   | <             | 11.45                    |               | Missing | -0.00227889  | 2339              |
| ALB.resultn        | >= | 2.915 Hemoglobin.resultn   | >=            | 11.45                    |               | Missing | -0.001960172 | 2339              |
| ALK.times.uln      | =  | Missing                    | TBILI.resultn | =                        | Missing       |         | -0.001637407 | 2340              |
| ALK.times.uln      | =  | Missing                    | TBILI.resultn | <                        | 0.95          |         | -0.001673709 | 2340              |
| ALK.times.uln      | =  | Missing                    | TBILI.resultn | >=                       | 0.95          |         | 0.000544277  | 2340              |
| ALK.times.uln      | <  | 6.338830603 AST.resultn    | =             | Missing                  |               |         | -0.000757346 | 2340              |
| ALK.times.uln      | <  | 6.338830603 AST.resultn    | <             | 47.5                     |               |         | -0.00166616  | 2340              |
| ALK.times.uln      | <  | 6.338830603 AST.resultn    | >=            | 47.5                     |               |         | 0            | 2340              |
| ALK.times.uln      | >= | 6.338830603                |               |                          |               |         | -0.001333411 | 2340              |
| age.yrs            | =  | Missing                    |               |                          |               |         | 0.000194385  | 2341              |
| age.yrs            | <  | 62.47912389 Sodium.resultn | =             | Missing                  |               |         | 0            | 2341              |
| age.yrs            | <  | 62.47912389 Sodium.resultn | <             | 141.5                    |               |         | 0.000390638  | 2341              |
| age.yrs            | <  | 62.47912389 Sodium.resultn | >=            | 141.5                    |               |         | -0.000478469 | 2341              |
| age.yrs            | >= | 62.47912389 AST.resultn    | =             | Missing                  |               |         | 0.000926733  | 2341              |
| age.yrs            | >= | 62.47912389 AST.resultn    | <             | 49.5                     |               |         | -0.000842806 | 2341              |
| age.yrs            | >= | 62.47912389 AST.resultn    | >=            | 49.5                     |               |         | 0.00285714   | 2341              |
| psc.yrs.dur        | =  | Missing                    |               |                          |               |         | 0.000146201  | 2342              |
| psc.yrs.dur        | <  | 6.410677618 ALK.times.uln  | =             | Missing                  |               |         | 0            | 2342              |
| psc.yrs.dur        | <  | 6.410677618 ALK.times.uln  | <             | 5.380640702              |               |         | 0.000114262  | 2342              |
| psc.yrs.dur        | <  | 6.410677618 ALK.times.uln  | >=            | 5.380640702              |               |         | -0.000740665 | 2342              |
| psc.yrs.dur        | >= | 6.410677618 AST.resultn    | =             | Missing                  |               |         | 0.000731586  | 2342              |
| psc.yrs.dur        | >= | 6.410677618 AST.resultn    | <             | 43                       |               |         | -0.000680165 | 2342              |
| psc.yrs.dur        | >= | 6.410677618 AST.resultn    | >=            | 43                       |               |         | 0.001694144  | 2342              |
| Hemoglobin.resultn | =  | Missing                    | TBILI.resultn | =                        | Missing       |         | 0.001109444  | 2343              |
| Hemoglobin.resultn | =  | Missing                    | TBILI.resultn | <                        | 1.45          |         | 0.000785783  | 2343              |
| Hemoglobin.resultn | =  | Missing                    | TBILI.resultn | >=                       | 1.45          |         | 0.002404088  | 2343              |
| Hemoglobin.resultn | <  | 11.75                      |               |                          |               |         | 0.0004284    | 2343              |
| Hemoglobin.resultn | >= | 11.75 ALK.times.uln        | =             | Missing                  |               |         | 0            | 2343              |
| Hemoglobin.resultn | >= | 11.75 ALK.times.uln        | <             | 2.815208295              |               |         | 0.00044718   | 2343              |
| Hemoglobin.resultn | >= | 11.75 ALK.times.uln        | >=            | 2.815208295              |               |         | 0.001842293  | 2343              |
| TBILI.resultn      | =  | Missing                    |               |                          |               |         | 5.99E-06     | 2344              |
| TBILI.resultn      | <  | 2.35 ALB.resultn           | =             | Missing                  |               |         | 0            | 2344              |
| TBILI.resultn      | <  | 2.35 ALB.resultn           | <             | 3.27                     |               |         | 1.69E-05     | 2344              |
| TBILI.resultn      | <  | 2.35 ALB.resultn           | >=            | 3.27                     |               |         | 0.000742713  | 2344              |
| TBILI.resultn      | >= | 2.35 psc.yrs.dur           | =             | Missing                  |               |         | 0.001576472  | 2344              |
| TBILI.resultn      | >= | 2.35 psc.yrs.dur           | <             | 2.036960986              |               |         | 0.001036887  | 2344              |
| TBILI.resultn      | >= | 2.35 psc.yrs.dur           | >=            | 2.036960986              |               |         | 0.002493768  | 2344              |
| psc.yrs.dur        | =  | Missing                    |               |                          |               | Missing | -0.002648374 | 2345              |
| psc.yrs.dur        | <  | 0.839151266                |               |                          |               | Missing | -0.003020841 | 2345              |
| psc.yrs.dur        | >= | 0.839151266 age.yrs        | =             | Missing                  |               | Missing | -0.002136667 | 2345              |
| psc.yrs.dur        | >= | 0.839151266 age.yrs        | <             | 53.4715948               |               | Missing | -0.002326364 | 2345              |
| psc.yrs.dur        | >= | 0.839151266 age.yrs        | >=            | 53.4715948 AST.resultn   | =             | Missing | -0.001649778 | 2345              |
| psc.yrs.dur        | >= | 0.839151266 age.yrs        | >=            | 53.4715948 AST.resultn   | <             | 57.5    | -0.003299555 | 2345              |
| psc.yrs.dur        | >= | 0.839151266 age.yrs        | >=            | 53.4715948 AST.resultn   | >=            | 57.5    | 0            | 2345              |
| ALB.resultn        | =  | Missing                    |               |                          |               | Missing | -0.000706442 | 2346              |
| ALB.resultn        | <  | 2.965                      |               |                          |               | Missing | 0.000123098  | 2346              |
| ALB.resultn        | >= | 2.965 ALK.times.uln        | =             | Missing                  |               | Missing | -0.001176901 | 2346              |
| ALB.resultn        | >= | 2.965 ALK.times.uln        | <             | 2.81254114               |               | Missing | -0.002030361 | 2346              |
| ALB.resultn        | >= | 2.965 ALK.times.uln        | >=            | 2.81254114 TBILI.resultn | =             | Missing | -0.000833788 | 2346              |
| ALB.resultn        | >= | 2.965 ALK.times.uln        | >=            | 2.81254114 TBILI.resultn | <             | 0.85    | -0.002038149 | 2346              |
| ALB.resultn        | >= | 2.965 ALK.times.uln        | >=            | 2.81254114 TBILI.resultn | >=            | 0.85    | 0            | 2346              |
| Hemoglobin.resultn | =  | Missing                    | ALB.resultn   | =                        | Missing       |         | -0.000753647 | 2347              |
| Hemoglobin.resultn | =  | Missing                    | ALB.resultn   | <                        | 3.95          |         | 0.001563654  | 2347              |
| Hemoglobin.resultn | =  | Missing                    | ALB.resultn   | >=                       | 3.95          |         | -0.000121767 | 2347              |
| Hemoglobin.resultn | <  | 11.95                      |               |                          |               |         | -0.000255589 | 2347              |
| Hemoglobin.resultn | >= | 11.95 Sodium.resultn       | =             | Missing                  |               |         | 0            | 2347              |
| Hemoglobin.resultn | >= | 11.95 Sodium.resultn       | <             | 138.5                    |               |         | 0.001928855  | 2347              |
| Hemoglobin.resultn | >= | 11.95 Sodium.resultn       | >=            | 138.5                    |               |         | -0.000465255 | 2347              |

|               |    |                         |    |                         |         |              |              |      |
|---------------|----|-------------------------|----|-------------------------|---------|--------------|--------------|------|
| psc.yrs.dur   | =  | Missing                 |    |                         | Missing | 0.000149161  | 2348         |      |
| psc.yrs.dur   | <  | 13.49623546 ALB.resultn | =  | Missing                 | Missing | 2.54E-05     | 2348         |      |
| psc.yrs.dur   | <  | 13.49623546 ALB.resultn | <  | 3.05                    | Missing | 0.00094197   | 2348         |      |
| psc.yrs.dur   | <  | 13.49623546 ALB.resultn | >= | 3.05 TBILL.resultn      | =       | Missing      | 4.93E-06     | 2348 |
| psc.yrs.dur   | <  | 13.49623546 ALB.resultn | >= | 3.05 TBILL.resultn      | <       | 2.6          | 5.23E-06     | 2348 |
| psc.yrs.dur   | <  | 13.49623546 ALB.resultn | >= | 3.05 TBILL.resultn      | >=      | 2.6          | 0            | 2348 |
| psc.yrs.dur   | >= | 13.49623546             |    |                         | Missing | 0.002586606  | 2348         |      |
| TBILL.resultn | =  | Missing                 |    |                         | Missing | 0.000513828  | 2349         |      |
| TBILL.resultn | <  | 3.25 ALK.times.uln      | =  | Missing age.yrs         | =       | Missing      | -0.001822391 | 2349 |
| TBILL.resultn | <  | 3.25 ALK.times.uln      | =  | Missing age.yrs         | <       | 65.01848049  | -0.002202056 | 2349 |
| TBILL.resultn | <  | 3.25 ALK.times.uln      | =  | Missing age.yrs         | >=      | 65.01848049  | 0            | 2349 |
| TBILL.resultn | <  | 3.25 ALK.times.uln      | <  | 6.115825908             | Missing | -0.001380221 | 2349         |      |
| TBILL.resultn | <  | 3.25 ALK.times.uln      | >= | 6.115825908             | Missing | -0.000268116 | 2349         |      |
| TBILL.resultn | >= | 3.25                    |    |                         | Missing | -0.001678265 | 2349         |      |
| ALB.resultn   | =  | Missing                 |    |                         | Missing | 0.000880892  | 2350         |      |
| ALB.resultn   | <  | 2.95                    |    |                         | Missing | 0.001034807  | 2350         |      |
| ALB.resultn   | >= | 2.95 TBILL.resultn      | =  | Missing                 | Missing | 0.000491806  | 2350         |      |
| ALB.resultn   | >= | 2.95 TBILL.resultn      | <  | 3.8 AST.resultn         | =       | Missing      | 0.000515778  | 2350 |
| ALB.resultn   | >= | 2.95 TBILL.resultn      | <  | 3.8 AST.resultn         | <       | 74           | 0.000771757  | 2350 |
| ALB.resultn   | >= | 2.95 TBILL.resultn      | <  | 3.8 AST.resultn         | >=      | 74           | 0            | 2350 |
| ALB.resultn   | >= | 2.95 TBILL.resultn      | >= | 3.8                     | Missing | 5.18E-06     | 2350         |      |
| age.yrs       | =  | Missing                 |    |                         |         | 0.000187936  | 2351         |      |
| age.yrs       | <  | 62.47091034 ALB.resultn | =  | Missing                 |         | 0            | 2351         |      |
| age.yrs       | <  | 62.47091034 ALB.resultn | <  | 3.135                   |         | -0.000206319 | 2351         |      |
| age.yrs       | <  | 62.47091034 ALB.resultn | >= | 3.135                   |         | 0.000213241  | 2351         |      |
| age.yrs       | >= | 62.47091034 AST.resultn | =  | Missing                 |         | 0.000444441  | 2351         |      |
| age.yrs       | >= | 62.47091034 AST.resultn | <  | 51                      |         | -0.000746741 | 2351         |      |
| age.yrs       | >= | 62.47091034 AST.resultn | >= | 51                      |         | 0.001543993  | 2351         |      |
| TBILL.resultn | =  | Missing                 |    |                         | Missing | -0.002364222 | 2352         |      |
| TBILL.resultn | <  | 3.95 psc.yrs.dur        | =  | Missing                 | Missing | -0.001337887 | 2352         |      |
| TBILL.resultn | <  | 3.95 psc.yrs.dur        | <  | 6.783025325             | Missing | -0.001403474 | 2352         |      |
| TBILL.resultn | <  | 3.95 psc.yrs.dur        | >= | 6.783025325 AST.resultn | =       | Missing      | -0.000894081 | 2352 |
| TBILL.resultn | <  | 3.95 psc.yrs.dur        | >= | 6.783025325 AST.resultn | <       | 43           | -0.002357123 | 2352 |
| TBILL.resultn | <  | 3.95 psc.yrs.dur        | >= | 6.783025325 AST.resultn | >=      | 43           | 0            | 2352 |
| TBILL.resultn | >= | 3.95                    |    |                         | Missing | -0.00179191  | 2352         |      |
| ALB.resultn   | =  | Missing                 |    |                         | Missing | -0.000742362 | 2353         |      |
| ALB.resultn   | <  | 2.915                   |    |                         | Missing | 0.000261246  | 2353         |      |
| ALB.resultn   | >= | 2.915 ALB.resultn       | =  | Missing                 | Missing | -0.000728466 | 2353         |      |
| ALB.resultn   | >= | 2.915 ALB.resultn       | <  | 3.135                   | Missing | -0.00116331  | 2353         |      |
| ALB.resultn   | >= | 2.915 ALB.resultn       | >= | 3.135 ALK.times.uln     | =       | Missing      | 0            | 2353 |
| ALB.resultn   | >= | 2.915 ALB.resultn       | >= | 3.135 ALK.times.uln     | <       | 5.438574341  | -0.000976358 | 2353 |
| ALB.resultn   | >= | 2.915 ALB.resultn       | >= | 3.135 ALK.times.uln     | >=      | 5.438574341  | 0.00069464   | 2353 |
| ALK.times.uln | =  | Missing psc.yrs.dur     | =  | Missing                 | Missing | -0.00193902  | 2354         |      |
| ALK.times.uln | =  | Missing psc.yrs.dur     | <  | 0.839151266             | Missing | -0.00273564  | 2354         |      |
| ALK.times.uln | =  | Missing psc.yrs.dur     | >= | 0.839151266 AST.resultn | =       | Missing      | -0.00104584  | 2354 |
| ALK.times.uln | =  | Missing psc.yrs.dur     | >= | 0.839151266 AST.resultn | <       | 57.5         | -0.002662139 | 2354 |
| ALK.times.uln | =  | Missing psc.yrs.dur     | >= | 0.839151266 AST.resultn | >=      | 57.5         | 0            | 2354 |
| ALK.times.uln | <  | 6.02173913              |    |                         | Missing | -0.002029458 | 2354         |      |
| ALK.times.uln | >= | 6.02173913              |    |                         | Missing | -0.001057022 | 2354         |      |
| PLT.resultn   | =  | Missing TBILL.resultn   | =  | Missing                 |         | -0.001293926 | 2355         |      |
| PLT.resultn   | =  | Missing TBILL.resultn   | <  | 0.85                    |         | -0.002289254 | 2355         |      |
| PLT.resultn   | =  | Missing TBILL.resultn   | >= | 0.85                    |         | 0            | 2355         |      |
| PLT.resultn   | <  | 185.5                   |    |                         |         | 0.000156156  | 2355         |      |
| PLT.resultn   | >= | 185.5 TBILL.resultn     | =  | Missing                 |         | -0.001405518 | 2355         |      |
| PLT.resultn   | >= | 185.5 TBILL.resultn     | <  | 3.5                     |         | -0.001388353 | 2355         |      |
| PLT.resultn   | >= | 185.5 TBILL.resultn     | >= | 3.5                     |         | -0.001733365 | 2355         |      |
| TBILL.resultn | =  | Missing                 |    |                         |         | -1.37E-05    | 2356         |      |
| TBILL.resultn | <  | 1.65 Sodium.resultn     | =  | Missing                 |         | 0            | 2356         |      |
| TBILL.resultn | <  | 1.65 Sodium.resultn     | <  | 142.5                   |         | 0.000237301  | 2356         |      |
| TBILL.resultn | <  | 1.65 Sodium.resultn     | >= | 142.5                   |         | 0.003621255  | 2356         |      |
| TBILL.resultn | >= | 1.65 PLT.resultn        | =  | Missing                 |         | 0.001575885  | 2356         |      |
| TBILL.resultn | >= | 1.65 PLT.resultn        | <  | 219                     |         | 0.002423245  | 2356         |      |

|                |    |             |                    |    |             |               |         |              |              |      |
|----------------|----|-------------|--------------------|----|-------------|---------------|---------|--------------|--------------|------|
| TBILL.resultn  | >= | 1.65        | PLT.resultn        | >= | 219         |               |         | 0.001091678  | 2356         |      |
| AST.resultn    | =  | Missing     |                    |    |             | Missing       |         | -0.000522068 | 2357         |      |
| AST.resultn    | <  | 137         | TBILL.resultn      | =  | Missing     | Missing       |         | -0.000487077 | 2357         |      |
| AST.resultn    | <  | 137         | TBILL.resultn      | <  | 1.65        | ALK.times.uln | =       | Missing      | 0            | 2357 |
| AST.resultn    | <  | 137         | TBILL.resultn      | <  | 1.65        | ALK.times.uln | <       | 4.885503497  | -0.000983943 | 2357 |
| AST.resultn    | <  | 137         | TBILL.resultn      | <  | 1.65        | ALK.times.uln | >=      | 4.885503497  | 0.000962717  | 2357 |
| AST.resultn    | <  | 137         | TBILL.resultn      | >= | 1.65        |               | Missing |              | 0.001214274  | 2357 |
| AST.resultn    | >= | 137         |                    |    |             | Missing       |         | -0.000754977 | 2357         |      |
| ALK.times.uln  | =  | Missing     | PLT.resultn        | =  | Missing     | Missing       |         | -0.002386866 | 2358         |      |
| ALK.times.uln  | =  | Missing     | PLT.resultn        | <  | 214.5       | Missing       |         | -0.002727823 | 2358         |      |
| ALK.times.uln  | =  | Missing     | PLT.resultn        | >= | 214.5       | TBILL.resultn | =       | Missing      | -0.002240133 | 2358 |
| ALK.times.uln  | =  | Missing     | PLT.resultn        | >= | 214.5       | TBILL.resultn | <       | 0.95         | -0.003306862 | 2358 |
| ALK.times.uln  | =  | Missing     | PLT.resultn        | >= | 214.5       | TBILL.resultn | >=      | 0.95         | 0            | 2358 |
| ALK.times.uln  | <  | 6.02        |                    |    |             | Missing       |         | -0.002588594 | 2358         |      |
| ALK.times.uln  | >= | 6.02        |                    |    |             | Missing       |         | -0.001290763 | 2358         |      |
| TBILL.resultn  | =  | Missing     |                    |    |             | Missing       |         | 0.001157935  | 2359         |      |
| TBILL.resultn  | <  | 3.05        | age.yrs            | =  | Missing     | Missing       |         | -0.000177186 | 2359         |      |
| TBILL.resultn  | <  | 3.05        | age.yrs            | <  | 70.96235455 | ALK.times.uln | =       | Missing      | 0            | 2359 |
| TBILL.resultn  | <  | 3.05        | age.yrs            | <  | 70.96235455 | ALK.times.uln | <       | 5.951330827  | -0.000446133 | 2359 |
| TBILL.resultn  | <  | 3.05        | age.yrs            | <  | 70.96235455 | ALK.times.uln | >=      | 5.951330827  | 0.000448253  | 2359 |
| TBILL.resultn  | <  | 3.05        | age.yrs            | >= | 70.96235455 |               | Missing |              | 0.002266871  | 2359 |
| TBILL.resultn  | >= | 3.05        |                    |    |             | Missing       |         | -0.000411866 | 2359         |      |
| AST.resultn    | =  | Missing     |                    |    |             | Missing       |         | -0.002607349 | 2360         |      |
| AST.resultn    | <  | 211.5       | Sodium.resultn     | =  | Missing     | Missing       |         | -0.001651687 | 2360         |      |
| AST.resultn    | <  | 211.5       | Sodium.resultn     | <  | 136.5       |               | Missing |              | -0.001055743 | 2360 |
| AST.resultn    | <  | 211.5       | Sodium.resultn     | >= | 136.5       | age.yrs       | =       | Missing      | -0.001985251 | 2360 |
| AST.resultn    | <  | 211.5       | Sodium.resultn     | >= | 136.5       | age.yrs       | <       | 64.65571526  | -0.002209671 | 2360 |
| AST.resultn    | <  | 211.5       | Sodium.resultn     | >= | 136.5       | age.yrs       | >=      | 64.65571526  | 0            | 2360 |
| AST.resultn    | >= | 211.5       |                    |    |             | Missing       |         | -0.000471351 | 2360         |      |
| Sodium.resultn | =  | Missing     |                    |    |             |               |         | 2.18E-06     | 2361         |      |
| Sodium.resultn | <  | 138.5       | psc.yrs.dur        | =  | Missing     |               |         | 0.000634705  | 2361         |      |
| Sodium.resultn | <  | 138.5       | psc.yrs.dur        | <  | 1.196440794 |               |         | -4.57E-05    | 2361         |      |
| Sodium.resultn | <  | 138.5       | psc.yrs.dur        | >= | 1.196440794 |               |         | 0.001541852  | 2361         |      |
| Sodium.resultn | >= | 138.5       | ALB.resultn        | =  | Missing     |               |         | -2.98E-05    | 2361         |      |
| Sodium.resultn | >= | 138.5       | ALB.resultn        | <  | 3.165       |               |         | -0.000307111 | 2361         |      |
| Sodium.resultn | >= | 138.5       | ALB.resultn        | >= | 3.165       |               |         | 0            | 2361         |      |
| ALB.resultn    | =  | Missing     |                    |    |             | Missing       |         | -0.001009023 | 2362         |      |
| ALB.resultn    | <  | 3.225       |                    |    |             | Missing       |         | 0.001529254  | 2362         |      |
| ALB.resultn    | >= | 3.225       | TBILL.resultn      | =  | Missing     | Missing       |         | -0.000259309 | 2362         |      |
| ALB.resultn    | >= | 3.225       | TBILL.resultn      | <  | 2.25        | ALK.times.uln | =       | Missing      | 0            | 2362 |
| ALB.resultn    | >= | 3.225       | TBILL.resultn      | <  | 2.25        | ALK.times.uln | <       | 5.462893197  | -0.000488222 | 2362 |
| ALB.resultn    | >= | 3.225       | TBILL.resultn      | <  | 2.25        | ALK.times.uln | >=      | 5.462893197  | 0.001983252  | 2362 |
| ALB.resultn    | >= | 3.225       | TBILL.resultn      | >= | 2.25        |               | Missing |              | -0.000513768 | 2362 |
| ALK.times.uln  | =  | Missing     | ALB.resultn        | =  | Missing     |               |         | -0.002258481 | 2363         |      |
| ALK.times.uln  | =  | Missing     | ALB.resultn        | <  | 3.7         |               |         | 0.002479397  | 2363         |      |
| ALK.times.uln  | =  | Missing     | ALB.resultn        | >= | 3.7         |               |         | -0.001755321 | 2363         |      |
| ALK.times.uln  | <  | 7.868810472 | ALK.times.uln      | =  | Missing     |               |         | -0.001307249 | 2363         |      |
| ALK.times.uln  | <  | 7.868810472 | ALK.times.uln      | <  | 5.85173913  |               |         | -0.001383696 | 2363         |      |
| ALK.times.uln  | <  | 7.868810472 | ALK.times.uln      | >= | 5.85173913  |               |         | 0            | 2363         |      |
| ALK.times.uln  | >= | 7.868810472 |                    |    |             |               |         | -0.001715378 | 2363         |      |
| ALB.resultn    | =  | Missing     |                    |    |             | Missing       |         | -0.000332061 | 2364         |      |
| ALB.resultn    | <  | 2.95        |                    |    |             | Missing       |         | 0.001603437  | 2364         |      |
| ALB.resultn    | >= | 2.95        | ALK.times.uln      | =  | Missing     | Missing       |         | 0.000982878  | 2364         |      |
| ALB.resultn    | >= | 2.95        | ALK.times.uln      | <  | 6.338830603 | TBILL.resultn | =       | Missing      | 0.000755977  | 2364 |
| ALB.resultn    | >= | 2.95        | ALK.times.uln      | <  | 6.338830603 | TBILL.resultn | <       | 1.55         | 0.000906018  | 2364 |
| ALB.resultn    | >= | 2.95        | ALK.times.uln      | <  | 6.338830603 | TBILL.resultn | >=      | 1.55         | 0            | 2364 |
| ALB.resultn    | >= | 2.95        | ALK.times.uln      | >= | 6.338830603 |               | Missing |              | -1.24E-05    | 2364 |
| psc.yrs.dur    | =  | Missing     |                    |    |             |               |         | 0.000117723  | 2365         |      |
| psc.yrs.dur    | <  | 6.410677618 | Hemoglobin.resultn | =  | Missing     |               |         | 0            | 2365         |      |
| psc.yrs.dur    | <  | 6.410677618 | Hemoglobin.resultn | <  | 11.35       |               |         | -0.000555517 | 2365         |      |
| psc.yrs.dur    | <  | 6.410677618 | Hemoglobin.resultn | >= | 11.35       |               |         | 0.000125472  | 2365         |      |
| psc.yrs.dur    | >= | 6.410677618 | AST.resultn        | =  | Missing     |               |         | 0.000499831  | 2365         |      |

|                    |    |             |               |    |             |                    |         |              |              |      |
|--------------------|----|-------------|---------------|----|-------------|--------------------|---------|--------------|--------------|------|
| psc.yrs.dur        | >= | 6.410677618 | AST.resultn   | <  | 47          |                    |         | -0.000846783 | 2365         |      |
| psc.yrs.dur        | >= | 6.410677618 | AST.resultn   | >= | 47          |                    |         | 0.001622009  | 2365         |      |
| Sodium.resultn     | =  | Missing     |               |    |             |                    |         | -0.000544008 | 2366         |      |
| Sodium.resultn     | <  | 141.5       | ALB.resultn   | =  | Missing     |                    |         | 0.000340525  | 2366         |      |
| Sodium.resultn     | <  | 141.5       | ALB.resultn   | <  | 3.645       |                    |         | 0.001091682  | 2366         |      |
| Sodium.resultn     | <  | 141.5       | ALB.resultn   | >= | 3.645       |                    |         | 0            | 2366         |      |
| Sodium.resultn     | >= | 141.5       | ALB.resultn   | =  | Missing     |                    |         | -0.000661748 | 2366         |      |
| Sodium.resultn     | >= | 141.5       | ALB.resultn   | <  | 3.48        |                    |         | -0.000672923 | 2366         |      |
| Sodium.resultn     | >= | 141.5       | ALB.resultn   | >= | 3.48        |                    |         | -0.000658255 | 2366         |      |
| TBILL.resultn      | =  | Missing     |               |    |             |                    | Missing | -1.77E-05    | 2367         |      |
| TBILL.resultn      | <  | 2.65        | ALK.times.uln | =  | Missing     | ALB.resultn        | =       | Missing      | 0.001428511  | 2367 |
| TBILL.resultn      | <  | 2.65        | ALK.times.uln | =  | Missing     | ALB.resultn        | <       | 3.95         | 0.00371413   | 2367 |
| TBILL.resultn      | <  | 2.65        | ALK.times.uln | =  | Missing     | ALB.resultn        | >=      | 3.95         | 0            | 2367 |
| TBILL.resultn      | <  | 2.65        | ALK.times.uln | <  | 5.412513212 |                    | Missing |              | 0.000650094  | 2367 |
| TBILL.resultn      | <  | 2.65        | ALK.times.uln | >= | 5.412513212 |                    | Missing |              | 0.002473884  | 2367 |
| TBILL.resultn      | >= | 2.65        |               |    |             |                    | Missing |              | 0.000526641  | 2367 |
| ALB.resultn        | =  | Missing     |               |    |             |                    | Missing |              | 3.18E-05     | 2368 |
| ALB.resultn        | <  | 2.965       |               |    |             |                    | Missing |              | 0.001434945  | 2368 |
| ALB.resultn        | >= | 2.965       | ALB.resultn   | =  | Missing     |                    | Missing |              | -0.000393714 | 2368 |
| ALB.resultn        | >= | 2.965       | ALB.resultn   | <  | 3.45        |                    | Missing |              | -0.000566955 | 2368 |
| ALB.resultn        | >= | 2.965       | ALB.resultn   | >= | 3.45        | ALK.times.uln      | =       | Missing      | 0            | 2368 |
| ALB.resultn        | >= | 2.965       | ALB.resultn   | >= | 3.45        | ALK.times.uln      | <       | 5.462893197  | -0.000590692 | 2368 |
| ALB.resultn        | >= | 2.965       | ALB.resultn   | >= | 3.45        | ALK.times.uln      | >=      | 5.462893197  | 0.000856261  | 2368 |
| TBILL.resultn      | =  | Missing     |               |    |             |                    | Missing |              | 0.003048281  | 2369 |
| TBILL.resultn      | <  | 3.15        | TBILL.resultn | =  | Missing     |                    | Missing |              | 0.000934593  | 2369 |
| TBILL.resultn      | <  | 3.15        | TBILL.resultn | <  | 1.55        |                    | Missing |              | 0.000943575  | 2369 |
| TBILL.resultn      | <  | 3.15        | TBILL.resultn | >= | 1.55        | Hemoglobin.resultn | =       | Missing      | 0.000881523  | 2369 |
| TBILL.resultn      | <  | 3.15        | TBILL.resultn | >= | 1.55        | Hemoglobin.resultn | <       | 13.75        | 0.002163739  | 2369 |
| TBILL.resultn      | <  | 3.15        | TBILL.resultn | >= | 1.55        | Hemoglobin.resultn | >=      | 13.75        | 0            | 2369 |
| TBILL.resultn      | >= | 3.15        |               |    |             |                    | Missing |              | 0.000375433  | 2369 |
| Sodium.resultn     | =  | Missing     |               |    |             |                    | Missing |              | -0.00139     | 2370 |
| Sodium.resultn     | <  | 136.5       |               |    |             |                    | Missing |              | 0.000266971  | 2370 |
| Sodium.resultn     | >= | 136.5       | age.yrs       | =  | Missing     |                    | Missing |              | -0.001177664 | 2370 |
| Sodium.resultn     | >= | 136.5       | age.yrs       | <  | 66.61054073 | AST.resultn        | =       | Missing      | -0.001453227 | 2370 |
| Sodium.resultn     | >= | 136.5       | age.yrs       | <  | 66.61054073 | AST.resultn        | <       | 145.5        | -0.001651395 | 2370 |
| Sodium.resultn     | >= | 136.5       | age.yrs       | <  | 66.61054073 | AST.resultn        | >=      | 145.5        | 0            | 2370 |
| Sodium.resultn     | >= | 136.5       | age.yrs       | >= | 66.61054073 |                    | Missing |              | 0.002321984  | 2370 |
| Hemoglobin.resultn | =  | Missing     | TBILL.resultn | =  | Missing     |                    |         |              | -0.000927326 | 2371 |
| Hemoglobin.resultn | =  | Missing     | TBILL.resultn | <  | 0.75        |                    |         |              | -0.001714149 | 2371 |
| Hemoglobin.resultn | =  | Missing     | TBILL.resultn | >= | 0.75        |                    |         |              | 0            | 2371 |
| Hemoglobin.resultn | <  | 12.15       | TBILL.resultn | =  | Missing     |                    |         |              | -0.00089099  | 2371 |
| Hemoglobin.resultn | <  | 12.15       | TBILL.resultn | <  | 1.25        |                    |         |              | -0.000641998 | 2371 |
| Hemoglobin.resultn | <  | 12.15       | TBILL.resultn | >= | 1.25        |                    |         |              | -0.001275796 | 2371 |
| Hemoglobin.resultn | >= | 12.15       |               |    |             |                    |         |              | -0.00058201  | 2371 |
| psc.yrs.dur        | =  | Missing     |               |    |             |                    |         |              | -0.002530647 | 2372 |
| psc.yrs.dur        | <  | 1.891854894 | ALB.resultn   | =  | Missing     |                    |         |              | 0            | 2372 |
| psc.yrs.dur        | <  | 1.891854894 | ALB.resultn   | <  | 3.13        |                    |         |              | -0.003078019 | 2372 |
| psc.yrs.dur        | <  | 1.891854894 | ALB.resultn   | >= | 3.13        |                    |         |              | -0.003155127 | 2372 |
| psc.yrs.dur        | >= | 1.891854894 | psc.yrs.dur   | =  | Missing     |                    |         |              | -0.002051629 | 2372 |
| psc.yrs.dur        | >= | 1.891854894 | psc.yrs.dur   | <  | 2.92128679  |                    |         |              | -8.37E-05    | 2372 |
| psc.yrs.dur        | >= | 1.891854894 | psc.yrs.dur   | >= | 2.92128679  |                    |         |              | -0.00250576  | 2372 |
| TBILL.resultn      | =  | Missing     |               |    |             |                    | Missing |              | 0.000298261  | 2373 |
| TBILL.resultn      | <  | 3.5         | ALB.resultn   | =  | Missing     |                    | Missing |              | -0.000643032 | 2373 |
| TBILL.resultn      | <  | 3.5         | ALB.resultn   | <  | 3.45        |                    | Missing |              | -0.000279808 | 2373 |
| TBILL.resultn      | <  | 3.5         | ALB.resultn   | >= | 3.45        | ALB.resultn        | =       | Missing      | 0.000370673  | 2373 |
| TBILL.resultn      | <  | 3.5         | ALB.resultn   | >= | 3.45        | ALB.resultn        | <       | 3.75         | 0.002920902  | 2373 |
| TBILL.resultn      | <  | 3.5         | ALB.resultn   | >= | 3.45        | ALB.resultn        | >=      | 3.75         | 0            | 2373 |
| TBILL.resultn      | >= | 3.5         |               |    |             |                    | Missing |              | 0.001342085  | 2373 |
| Hemoglobin.resultn | =  | Missing     |               |    |             |                    | Missing |              | -0.00290357  | 2374 |
| Hemoglobin.resultn | <  | 12.75       |               |    |             |                    | Missing |              | -0.003351114 | 2374 |
| Hemoglobin.resultn | >= | 12.75       | ALK.times.uln | =  | Missing     |                    | Missing |              | -0.002594792 | 2374 |
| Hemoglobin.resultn | >= | 12.75       | ALK.times.uln | <  | 2.822501299 |                    | Missing |              | -0.003229037 | 2374 |

|                    |    |             |                    |    |             |                |    |             |              |      |
|--------------------|----|-------------|--------------------|----|-------------|----------------|----|-------------|--------------|------|
| Hemoglobin.resultn | >= | 12.75       | ALK.times.uln      | >= | 2.822501299 | TBILI.resultn  | =  | Missing     | -0.000990526 | 2374 |
| Hemoglobin.resultn | >= | 12.75       | ALK.times.uln      | >= | 2.822501299 | TBILI.resultn  | <  | 0.85        | -0.002971577 | 2374 |
| Hemoglobin.resultn | >= | 12.75       | ALK.times.uln      | >= | 2.822501299 | TBILI.resultn  | >= | 0.85        | 0            | 2374 |
| ALB.resultn        | =  | Missing     |                    |    |             |                |    |             | 0.000180696  | 2375 |
| ALB.resultn        | <  | 3.31        | age.yrs            | =  | Missing     |                |    |             | 0.001855014  | 2375 |
| ALB.resultn        | <  | 3.31        | age.yrs            | <  | 48.38603696 |                |    |             | 0.000806528  | 2375 |
| ALB.resultn        | <  | 3.31        | age.yrs            | >= | 48.38603696 |                |    |             | 0.002808184  | 2375 |
| ALB.resultn        | >= | 3.31        | TBILI.resultn      | =  | Missing     |                |    |             | 0.000448616  | 2375 |
| ALB.resultn        | >= | 3.31        | TBILI.resultn      | <  | 2.65        |                |    |             | 0.000477404  | 2375 |
| ALB.resultn        | >= | 3.31        | TBILI.resultn      | >= | 2.65        |                |    |             | 0            | 2375 |
| ALK.times.uln      | =  | Missing     |                    |    |             |                |    | Missing     | -0.002082887 | 2376 |
| ALK.times.uln      | <  | 6.291692182 | TBILI.resultn      | =  | Missing     |                |    | Missing     | -0.002540136 | 2376 |
| ALK.times.uln      | <  | 6.291692182 | TBILI.resultn      | <  | 0.85        |                |    | Missing     | -0.003258202 | 2376 |
| ALK.times.uln      | <  | 6.291692182 | TBILI.resultn      | >= | 0.85        | ALK.times.uln  | =  | Missing     | -0.001425528 | 2376 |
| ALK.times.uln      | <  | 6.291692182 | TBILI.resultn      | >= | 0.85        | ALK.times.uln  | <  | 2.795652174 | -0.002448984 | 2376 |
| ALK.times.uln      | <  | 6.291692182 | TBILI.resultn      | >= | 0.85        | ALK.times.uln  | >= | 2.795652174 | 0            | 2376 |
| ALK.times.uln      | >= | 6.291692182 |                    |    |             |                |    | Missing     | -0.002922426 | 2376 |
| ALB.resultn        | =  | Missing     |                    |    |             |                |    | Missing     | 0.000422389  | 2377 |
| ALB.resultn        | <  | 2.965       |                    |    |             |                |    | Missing     | 0.000549136  | 2377 |
| ALB.resultn        | >= | 2.965       | ALB.resultn        | =  | Missing     |                |    | Missing     | -0.000700347 | 2377 |
| ALB.resultn        | >= | 2.965       | ALB.resultn        | <  | 3.15        |                |    | Missing     | -0.00103595  | 2377 |
| ALB.resultn        | >= | 2.965       | ALB.resultn        | >= | 3.15        | TBILI.resultn  | =  | Missing     | -0.00068429  | 2377 |
| ALB.resultn        | >= | 2.965       | ALB.resultn        | >= | 3.15        | TBILI.resultn  | <  | 0.75        | -0.001416479 | 2377 |
| ALB.resultn        | >= | 2.965       | ALB.resultn        | >= | 3.15        | TBILI.resultn  | >= | 0.75        | 0            | 2377 |
| age.yrs            | =  | Missing     |                    |    |             |                |    | Missing     | 0.000319585  | 2378 |
| age.yrs            | <  | 68.1724846  | Hemoglobin.resultn | =  | Missing     |                |    | Missing     | 0.00053595   | 2378 |
| age.yrs            | <  | 68.1724846  | Hemoglobin.resultn | <  | 12.35       |                |    | Missing     | -3.47E-05    | 2378 |
| age.yrs            | <  | 68.1724846  | Hemoglobin.resultn | >= | 12.35       | Sodium.resultn | =  | Missing     | 0            | 2378 |
| age.yrs            | <  | 68.1724846  | Hemoglobin.resultn | >= | 12.35       | Sodium.resultn | <  | 138.5       | 0.00187349   | 2378 |
| age.yrs            | <  | 68.1724846  | Hemoglobin.resultn | >= | 12.35       | Sodium.resultn | >= | 138.5       | -0.000310642 | 2378 |
| age.yrs            | >= | 68.1724846  |                    |    |             |                |    | Missing     | 0.002951602  | 2378 |
| psc.yrs.dur        | =  | Missing     |                    |    |             |                |    |             | -0.001328231 | 2379 |
| psc.yrs.dur        | <  | 6.783025325 | TBILI.resultn      | =  | Missing     |                |    |             | 0            | 2379 |
| psc.yrs.dur        | <  | 6.783025325 | TBILI.resultn      | <  | 2.65        |                |    |             | -0.001478073 | 2379 |
| psc.yrs.dur        | <  | 6.783025325 | TBILI.resultn      | >= | 2.65        |                |    |             | -0.001651723 | 2379 |
| psc.yrs.dur        | >= | 6.783025325 | AST.resultn        | =  | Missing     |                |    |             | -0.000918488 | 2379 |
| psc.yrs.dur        | >= | 6.783025325 | AST.resultn        | <  | 47.5        |                |    |             | -0.002186441 | 2379 |
| psc.yrs.dur        | >= | 6.783025325 | AST.resultn        | >= | 47.5        |                |    |             | 0.000349464  | 2379 |
| TBILI.resultn      | =  | Missing     |                    |    |             |                |    | Missing     | -8.10E-05    | 2380 |
| TBILI.resultn      | <  | 3.15        | AST.resultn        | =  | Missing     |                |    | Missing     | 5.54E-05     | 2380 |
| TBILI.resultn      | <  | 3.15        | AST.resultn        | <  | 44          |                |    | Missing     | -0.000969699 | 2380 |
| TBILI.resultn      | <  | 3.15        | AST.resultn        | >= | 44          | AST.resultn    | =  | Missing     | 0.000703671  | 2380 |
| TBILI.resultn      | <  | 3.15        | AST.resultn        | >= | 44          | AST.resultn    | <  | 67          | 0.002174982  | 2380 |
| TBILI.resultn      | <  | 3.15        | AST.resultn        | >= | 44          | AST.resultn    | >= | 67          | 0            | 2380 |
| TBILI.resultn      | >= | 3.15        |                    |    |             |                |    | Missing     | -0.000554452 | 2380 |
| psc.yrs.dur        | =  | Missing     |                    |    |             |                |    |             | -0.000720915 | 2381 |
| psc.yrs.dur        | <  | 7.80971937  | TBILI.resultn      | =  | Missing     |                |    |             | 0            | 2381 |
| psc.yrs.dur        | <  | 7.80971937  | TBILI.resultn      | <  | 3.05        |                |    |             | -0.000838157 | 2381 |
| psc.yrs.dur        | <  | 7.80971937  | TBILI.resultn      | >= | 3.05        |                |    |             | -0.000978494 | 2381 |
| psc.yrs.dur        | >= | 7.80971937  | AST.resultn        | =  | Missing     |                |    |             | -0.000173357 | 2381 |
| psc.yrs.dur        | >= | 7.80971937  | AST.resultn        | <  | 44.5        |                |    |             | -0.001603439 | 2381 |
| psc.yrs.dur        | >= | 7.80971937  | AST.resultn        | >= | 44.5        |                |    |             | 0.000970709  | 2381 |
| PLT.resultn        | =  | Missing     |                    |    |             |                |    | Missing     | 0.001466541  | 2382 |
| PLT.resultn        | <  | 217         | TBILI.resultn      | =  | Missing     |                |    | Missing     | 0.001490159  | 2382 |
| PLT.resultn        | <  | 217         | TBILI.resultn      | <  | 1.65        | ALK.times.uln  | =  | Missing     | 0            | 2382 |
| PLT.resultn        | <  | 217         | TBILI.resultn      | <  | 1.65        | ALK.times.uln  | <  | 2.183873203 | -4.22E-05    | 2382 |
| PLT.resultn        | <  | 217         | TBILI.resultn      | <  | 1.65        | ALK.times.uln  | >= | 2.183873203 | 0.005386852  | 2382 |
| PLT.resultn        | <  | 217         | TBILI.resultn      | >= | 1.65        |                |    | Missing     | 0.002421765  | 2382 |
| PLT.resultn        | >= | 217         |                    |    |             |                |    | Missing     | 0.000506219  | 2382 |
| psc.yrs.dur        | =  | Missing     |                    |    |             |                |    |             | 0.000617883  | 2383 |
| psc.yrs.dur        | <  | 6.379192334 | ALK.times.uln      | =  | Missing     |                |    |             | 0            | 2383 |
| psc.yrs.dur        | <  | 6.379192334 | ALK.times.uln      | <  | 6.443379543 |                |    |             | 0.000810606  | 2383 |

|                |    |             |                    |    |             |               |    |              |              |      |
|----------------|----|-------------|--------------------|----|-------------|---------------|----|--------------|--------------|------|
| psc.yrs.dur    | <  | 6.379192334 | ALK.times.uln      | >= | 6.443379543 |               |    | -0.000311727 | 2383         |      |
| psc.yrs.dur    | >= | 6.379192334 | AST.resultn        | =  | Missing     |               |    | 0.000973233  | 2383         |      |
| psc.yrs.dur    | >= | 6.379192334 | AST.resultn        | <  | 89.5        |               |    | 0.000523816  | 2383         |      |
| psc.yrs.dur    | >= | 6.379192334 | AST.resultn        | >= | 89.5        |               |    | 0.002117204  | 2383         |      |
| Sodium.resultn | =  | Missing     |                    |    |             | Missing       |    | -0.000217693 | 2384         |      |
| Sodium.resultn | <  | 136.5       |                    |    |             | Missing       |    | 0.000817577  | 2384         |      |
| Sodium.resultn | >= | 136.5       | Hemoglobin.resultn | =  | Missing     | Missing       |    | 0.000601665  | 2384         |      |
| Sodium.resultn | >= | 136.5       | Hemoglobin.resultn | <  | 11.95       | Missing       |    | -0.000593714 | 2384         |      |
| Sodium.resultn | >= | 136.5       | Hemoglobin.resultn | >= | 11.95       | TBILI.resultn | =  | Missing      | -0.000714893 | 2384 |
| Sodium.resultn | >= | 136.5       | Hemoglobin.resultn | >= | 11.95       | TBILI.resultn | <  | 1.05         | -0.001156827 | 2384 |
| Sodium.resultn | >= | 136.5       | Hemoglobin.resultn | >= | 11.95       | TBILI.resultn | >= | 1.05         | 0            | 2384 |
| ALK.times.uln  | =  | Missing     | age.yrs            | =  | Missing     |               |    | -0.001005551 | 2385         |      |
| ALK.times.uln  | =  | Missing     | age.yrs            | <  | 56.56125941 |               |    | -0.000921889 | 2385         |      |
| ALK.times.uln  | =  | Missing     | age.yrs            | >= | 56.56125941 |               |    | -0.001301586 | 2385         |      |
| ALK.times.uln  | <  | 6.02173913  | TBILI.resultn      | =  | Missing     |               |    | -0.000975163 | 2385         |      |
| ALK.times.uln  | <  | 6.02173913  | TBILI.resultn      | <  | 1.65        |               |    | -0.001090964 | 2385         |      |
| ALK.times.uln  | <  | 6.02173913  | TBILI.resultn      | >= | 1.65        |               |    | 0            | 2385         |      |
| ALK.times.uln  | >= | 6.02173913  |                    |    |             |               |    | 0.000103775  | 2385         |      |
| ALK.times.uln  | =  | Missing     | ALB.resultn        | =  | Missing     | Missing       |    | -0.003414489 | 2386         |      |
| ALK.times.uln  | =  | Missing     | ALB.resultn        | <  | 3.95        | age.yrs       | =  | Missing      | -0.000963774 | 2386 |
| ALK.times.uln  | =  | Missing     | ALB.resultn        | <  | 3.95        | age.yrs       | <  | 52.73511294  | -0.001927548 | 2386 |
| ALK.times.uln  | =  | Missing     | ALB.resultn        | <  | 3.95        | age.yrs       | >= | 52.73511294  | 0            | 2386 |
| ALK.times.uln  | =  | Missing     | ALB.resultn        | >= | 3.95        |               |    | -0.003354968 | 2386         |      |
| ALK.times.uln  | <  | 7.740239044 |                    |    |             | Missing       |    | -0.002297806 | 2386         |      |
| ALK.times.uln  | >= | 7.740239044 |                    |    |             | Missing       |    | -0.002857342 | 2386         |      |
| ALB.resultn    | =  | Missing     |                    |    |             | Missing       |    | -0.001069497 | 2387         |      |
| ALB.resultn    | <  | 3.03        |                    |    |             | Missing       |    | -5.07E-05    | 2387         |      |
| ALB.resultn    | >= | 3.03        | TBILI.resultn      | =  | Missing     | Missing       |    | -0.001038414 | 2387         |      |
| ALB.resultn    | >= | 3.03        | TBILI.resultn      | <  | 2.75        | TBILI.resultn | =  | Missing      | -0.001047551 | 2387 |
| ALB.resultn    | >= | 3.03        | TBILI.resultn      | <  | 2.75        | TBILI.resultn | <  | 1.65         | -0.001114773 | 2387 |
| ALB.resultn    | >= | 3.03        | TBILI.resultn      | <  | 2.75        | TBILI.resultn | >= | 1.65         | 0            | 2387 |
| ALB.resultn    | >= | 3.03        | TBILI.resultn      | >= | 2.75        |               |    | Missing      | -0.000898556 | 2387 |
| psc.yrs.dur    | =  | Missing     |                    |    |             | Missing       |    | -0.001544783 | 2388         |      |
| psc.yrs.dur    | <  | 0.466803559 |                    |    |             | Missing       |    | -0.001918559 | 2388         |      |
| psc.yrs.dur    | >= | 0.466803559 | TBILI.resultn      | =  | Missing     | Missing       |    | -0.001210058 | 2388         |      |
| psc.yrs.dur    | >= | 0.466803559 | TBILI.resultn      | <  | 3.4         | age.yrs       | =  | Missing      | -0.001280026 | 2388 |
| psc.yrs.dur    | >= | 0.466803559 | TBILI.resultn      | <  | 3.4         | age.yrs       | <  | 52.98288843  | -0.001687307 | 2388 |
| psc.yrs.dur    | >= | 0.466803559 | TBILI.resultn      | <  | 3.4         | age.yrs       | >= | 52.98288843  | 0            | 2388 |
| psc.yrs.dur    | >= | 0.466803559 | TBILI.resultn      | >= | 3.4         |               |    | Missing      | -0.000398436 | 2388 |
| ALK.times.uln  | =  | Missing     | TBILI.resultn      | =  | Missing     |               |    | 4.14E-05     | 2389         |      |
| ALK.times.uln  | =  | Missing     | TBILI.resultn      | <  | 1.31        |               |    | 0.00085879   | 2389         |      |
| ALK.times.uln  | =  | Missing     | TBILI.resultn      | >= | 1.31        |               |    | 0.002650774  | 2389         |      |
| ALK.times.uln  | <  | 5.743849372 | PLT.resultn        | =  | Missing     |               |    | 0            | 2389         |      |
| ALK.times.uln  | <  | 5.743849372 | PLT.resultn        | <  | 209.5       |               |    | 0.001823384  | 2389         |      |
| ALK.times.uln  | <  | 5.743849372 | PLT.resultn        | >= | 209.5       |               |    | 3.67E-05     | 2389         |      |
| ALK.times.uln  | >= | 5.743849372 |                    |    |             |               |    | 0.001827751  | 2389         |      |
| ALB.resultn    | =  | Missing     |                    |    |             |               |    | 0.001085194  | 2390         |      |
| ALB.resultn    | <  | 3.33        | PLT.resultn        | =  | Missing     |               |    | 0.001551435  | 2390         |      |
| ALB.resultn    | <  | 3.33        | PLT.resultn        | <  | 257.5       |               |    | 0.002567008  | 2390         |      |
| ALB.resultn    | <  | 3.33        | PLT.resultn        | >= | 257.5       |               |    | 0.000916702  | 2390         |      |
| ALB.resultn    | >= | 3.33        | ALK.times.uln      | =  | Missing     |               |    | 0            | 2390         |      |
| ALB.resultn    | >= | 3.33        | ALK.times.uln      | <  | 5.628231843 |               |    | 0.000185023  | 2390         |      |
| ALB.resultn    | >= | 3.33        | ALK.times.uln      | >= | 5.628231843 |               |    | 0.002495209  | 2390         |      |
| psc.yrs.dur    | =  | Missing     |                    |    |             |               |    | 0.000302062  | 2391         |      |
| psc.yrs.dur    | <  | 6.410677618 | psc.yrs.dur        | =  | Missing     |               |    | 0.000223906  | 2391         |      |
| psc.yrs.dur    | <  | 6.410677618 | psc.yrs.dur        | <  | 0.004106776 |               |    | 0.001885981  | 2391         |      |
| psc.yrs.dur    | <  | 6.410677618 | psc.yrs.dur        | >= | 0.004106776 |               |    | 0            | 2391         |      |
| psc.yrs.dur    | >= | 6.410677618 | AST.resultn        | =  | Missing     |               |    | 0.000791091  | 2391         |      |
| psc.yrs.dur    | >= | 6.410677618 | AST.resultn        | <  | 89.5        |               |    | 0.000213125  | 2391         |      |
| psc.yrs.dur    | >= | 6.410677618 | AST.resultn        | >= | 89.5        |               |    | 0.001850695  | 2391         |      |
| age.yrs        | =  | Missing     |                    |    |             | Missing       |    | -0.000751142 | 2392         |      |
| age.yrs        | <  | 69.71800137 | ALB.resultn        | =  | Missing     | Missing       |    | -0.001805469 | 2392         |      |

|               |    |             |                |    |             |                    |         |              |              |      |
|---------------|----|-------------|----------------|----|-------------|--------------------|---------|--------------|--------------|------|
| age.yrs       | <  | 69.71800137 | ALB.resultn    | <  | 2.965       |                    | Missing | 0.000271798  | 2392         |      |
| age.yrs       | <  | 69.71800137 | ALB.resultn    | >= | 2.965       | ALB.resultn        | =       | Missing      | -0.000810521 | 2392 |
| age.yrs       | <  | 69.71800137 | ALB.resultn    | >= | 2.965       | ALB.resultn        | <       | 4.25         | -0.001317097 | 2392 |
| age.yrs       | <  | 69.71800137 | ALB.resultn    | >= | 2.965       | ALB.resultn        | >=      | 4.25         | 0            | 2392 |
| age.yrs       | >= | 69.71800137 |                |    |             |                    | Missing | 0.00086635   | 2392         |      |
| TBILL.resultn | =  | Missing     |                |    |             |                    |         | 0.000819836  | 2393         |      |
| TBILL.resultn | <  | 2.45        | ALK.times.uln  | =  | Missing     |                    |         | 0            | 2393         |      |
| TBILL.resultn | <  | 2.45        | ALK.times.uln  | <  | 6.115825908 |                    |         | -0.001259054 | 2393         |      |
| TBILL.resultn | <  | 2.45        | ALK.times.uln  | >= | 6.115825908 |                    |         | 0.000262001  | 2393         |      |
| TBILL.resultn | >= | 2.45        | psc.yrs.dur    | =  | Missing     |                    |         | 0.000210552  | 2393         |      |
| TBILL.resultn | >= | 2.45        | psc.yrs.dur    | <  | 2.318959617 |                    |         | -0.000191795 | 2393         |      |
| TBILL.resultn | >= | 2.45        | psc.yrs.dur    | >= | 2.318959617 |                    |         | 0.000773837  | 2393         |      |
| ALB.resultn   | =  | Missing     |                |    |             |                    | Missing | 4.23E-06     | 2394         |      |
| ALB.resultn   | <  | 2.915       |                |    |             |                    | Missing | 0.003056814  | 2394         |      |
| ALB.resultn   | >= | 2.915       | TBILL.resultn  | =  | Missing     |                    | Missing | 0.000278112  | 2394         |      |
| ALB.resultn   | >= | 2.915       | TBILL.resultn  | <  | 1.65        |                    | Missing | 0.000233046  | 2394         |      |
| ALB.resultn   | >= | 2.915       | TBILL.resultn  | >= | 1.65        | Hemoglobin.resultn | =       | Missing      | 0.000544145  | 2394 |
| ALB.resultn   | >= | 2.915       | TBILL.resultn  | >= | 1.65        | Hemoglobin.resultn | <       | 13.15        | 0.001414778  | 2394 |
| ALB.resultn   | >= | 2.915       | TBILL.resultn  | >= | 1.65        | Hemoglobin.resultn | >=      | 13.15        | 0            | 2394 |
| ALB.resultn   | =  | Missing     |                |    |             |                    | Missing | -0.002180852 | 2395         |      |
| ALB.resultn   | <  | 2.915       |                |    |             |                    | Missing | 0.000542441  | 2395         |      |
| ALB.resultn   | >= | 2.915       | TBILL.resultn  | =  | Missing     |                    | Missing | -0.001321641 | 2395         |      |
| ALB.resultn   | >= | 2.915       | TBILL.resultn  | <  | 4.25        | psc.yrs.dur        | =       | Missing      | -0.001306019 | 2395 |
| ALB.resultn   | >= | 2.915       | TBILL.resultn  | <  | 4.25        | psc.yrs.dur        | <       | 6.410677618  | -0.001489568 | 2395 |
| ALB.resultn   | >= | 2.915       | TBILL.resultn  | <  | 4.25        | psc.yrs.dur        | >=      | 6.410677618  | 0            | 2395 |
| ALB.resultn   | >= | 2.915       | TBILL.resultn  | >= | 4.25        |                    | Missing | -0.001651254 | 2395         |      |
| age.yrs       | =  | Missing     |                |    |             |                    | Missing | -0.002590722 | 2396         |      |
| age.yrs       | <  | 51.76180698 |                |    |             |                    | Missing | -0.002666302 | 2396         |      |
| age.yrs       | >= | 51.76180698 | AST.resultn    | =  | Missing     |                    | Missing | -0.002403324 | 2396         |      |
| age.yrs       | >= | 51.76180698 | AST.resultn    | <  | 51          |                    | Missing | -0.003182199 | 2396         |      |
| age.yrs       | >= | 51.76180698 | AST.resultn    | >= | 51          | psc.yrs.dur        | =       | Missing      | -0.001423449 | 2396 |
| age.yrs       | >= | 51.76180698 | AST.resultn    | >= | 51          | psc.yrs.dur        | <       | 0.431211499  | -0.002595702 | 2396 |
| age.yrs       | >= | 51.76180698 | AST.resultn    | >= | 51          | psc.yrs.dur        | >=      | 0.431211499  | 0            | 2396 |
| AST.resultn   | =  | Missing     |                |    |             |                    | Missing | -0.00406696  | 2397         |      |
| AST.resultn   | <  | 72.5        | AST.resultn    | =  | Missing     |                    | Missing | -0.002836236 | 2397         |      |
| AST.resultn   | <  | 72.5        | AST.resultn    | <  | 54.5        |                    | Missing | -0.003473884 | 2397         |      |
| AST.resultn   | <  | 72.5        | AST.resultn    | >= | 54.5        | TBILL.resultn      | =       | Missing      | -0.001105475 | 2397 |
| AST.resultn   | <  | 72.5        | AST.resultn    | >= | 54.5        | TBILL.resultn      | <       | 0.65         | -0.004120407 | 2397 |
| AST.resultn   | <  | 72.5        | AST.resultn    | >= | 54.5        | TBILL.resultn      | >=      | 0.65         | 0            | 2397 |
| AST.resultn   | >= | 72.5        |                |    |             |                    | Missing | -0.003489722 | 2397         |      |
| psc.yrs.dur   | =  | Missing     |                |    |             |                    |         | -0.00064099  | 2398         |      |
| psc.yrs.dur   | <  | 6.410677618 | PLT.resultn    | =  | Missing     |                    |         | 0            | 2398         |      |
| psc.yrs.dur   | <  | 6.410677618 | PLT.resultn    | <  | 170         |                    |         | 0.000733825  | 2398         |      |
| psc.yrs.dur   | <  | 6.410677618 | PLT.resultn    | >= | 170         |                    |         | -0.000890288 | 2398         |      |
| psc.yrs.dur   | >= | 6.410677618 | AST.resultn    | =  | Missing     |                    |         | -0.000359105 | 2398         |      |
| psc.yrs.dur   | >= | 6.410677618 | AST.resultn    | <  | 42          |                    |         | -0.001463481 | 2398         |      |
| psc.yrs.dur   | >= | 6.410677618 | AST.resultn    | >= | 42          |                    |         | 0.000966147  | 2398         |      |
| PLT.resultn   | =  | Missing     |                |    |             |                    |         | -0.000263415 | 2399         |      |
| PLT.resultn   | <  | 209.5       | ALB.resultn    | =  | Missing     |                    |         | 0.000386944  | 2399         |      |
| PLT.resultn   | <  | 209.5       | ALB.resultn    | <  | 3.92        |                    |         | 0.002243097  | 2399         |      |
| PLT.resultn   | <  | 209.5       | ALB.resultn    | >= | 3.92        |                    |         | -0.000231774 | 2399         |      |
| PLT.resultn   | >= | 209.5       | ALK.times.uln  | =  | Missing     |                    |         | 0            | 2399         |      |
| PLT.resultn   | >= | 209.5       | ALK.times.uln  | <  | 1.224233501 |                    |         | 0.00108833   | 2399         |      |
| PLT.resultn   | >= | 209.5       | ALK.times.uln  | >= | 1.224233501 |                    |         | -0.00070068  | 2399         |      |
| TBILL.resultn | =  | Missing     |                |    |             |                    |         | 0.003665296  | 2400         |      |
| TBILL.resultn | <  | 2.35        | Sodium.resultn | =  | Missing     |                    |         | 0            | 2400         |      |
| TBILL.resultn | <  | 2.35        | Sodium.resultn | <  | 137.5       |                    |         | 0.00187949   | 2400         |      |
| TBILL.resultn | <  | 2.35        | Sodium.resultn | >= | 137.5       |                    |         | 0.000235885  | 2400         |      |
| TBILL.resultn | >= | 2.35        | PLT.resultn    | =  | Missing     |                    |         | 0.001385529  | 2400         |      |
| TBILL.resultn | >= | 2.35        | PLT.resultn    | <  | 249.5       |                    |         | 0.001979313  | 2400         |      |
| TBILL.resultn | >= | 2.35        | PLT.resultn    | >= | 249.5       |                    |         | 0.000737765  | 2400         |      |
| ALK.times.uln | =  | Missing     |                |    |             |                    | Missing | -0.001876461 | 2401         |      |



|                    |    |             |               |    |             |                    |         |              |              |      |
|--------------------|----|-------------|---------------|----|-------------|--------------------|---------|--------------|--------------|------|
| ALK.times.uln      | <  | 7.850310559 | TBILI.resultn | =  | Missing     |                    | Missing | -0.002214989 | 2401         |      |
| ALK.times.uln      | <  | 7.850310559 | TBILI.resultn | <  | 2.05        | age.yrs            | =       | Missing      | -0.002326574 | 2401 |
| ALK.times.uln      | <  | 7.850310559 | TBILI.resultn | <  | 2.05        | age.yrs            | <       | 55.80971937  | -0.00295438  | 2401 |
| ALK.times.uln      | <  | 7.850310559 | TBILI.resultn | <  | 2.05        | age.yrs            | >=      | 55.80971937  | 0            | 2401 |
| ALK.times.uln      | <  | 7.850310559 | TBILI.resultn | >= | 2.05        |                    | Missing | -0.000939732 | 2401         |      |
| ALK.times.uln      | >= | 7.850310559 |               |    |             |                    | Missing | -0.002431705 | 2401         |      |
| ALK.times.uln      | =  | Missing     |               |    |             |                    |         | -0.00098181  | 2402         |      |
| ALK.times.uln      | <  | 5.462893197 | TBILI.resultn | =  | Missing     |                    |         | -0.001407994 | 2402         |      |
| ALK.times.uln      | <  | 5.462893197 | TBILI.resultn | <  | 2.8         |                    |         | -0.001505403 | 2402         |      |
| ALK.times.uln      | <  | 5.462893197 | TBILI.resultn | >= | 2.8         |                    |         | 0            | 2402         |      |
| ALK.times.uln      | >= | 5.462893197 | PLT.resultn   | =  | Missing     |                    |         | -0.000262739 | 2402         |      |
| ALK.times.uln      | >= | 5.462893197 | PLT.resultn   | <  | 274         |                    |         | 0.000439626  | 2402         |      |
| ALK.times.uln      | >= | 5.462893197 | PLT.resultn   | >= | 274         |                    |         | -0.000803019 | 2402         |      |
| TBILI.resultn      | =  | Missing     |               |    |             |                    | Missing | 0.00049205   | 2403         |      |
| TBILI.resultn      | <  | 0.95        |               |    |             |                    | Missing | -0.00219038  | 2403         |      |
| TBILI.resultn      | >= | 0.95        | psc.yrs.dur   | =  | Missing     |                    | Missing | -0.001154905 | 2403         |      |
| TBILI.resultn      | >= | 0.95        | psc.yrs.dur   | <  | 6.783025325 | Hemoglobin.resultn | =       | Missing      | 0            | 2403 |
| TBILI.resultn      | >= | 0.95        | psc.yrs.dur   | <  | 6.783025325 | Hemoglobin.resultn | <       | 12           | -0.001588087 | 2403 |
| TBILI.resultn      | >= | 0.95        | psc.yrs.dur   | <  | 6.783025325 | Hemoglobin.resultn | >=      | 12           | -0.001798099 | 2403 |
| TBILI.resultn      | >= | 0.95        | psc.yrs.dur   | >= | 6.783025325 |                    | Missing | -3.02E-05    | 2403         |      |
| ALB.resultn        | =  | Missing     |               |    |             |                    | Missing | -0.000750921 | 2404         |      |
| ALB.resultn        | <  | 2.965       |               |    |             |                    | Missing | 0.001197442  | 2404         |      |
| ALB.resultn        | >= | 2.965       | TBILI.resultn | =  | Missing     |                    | Missing | 0.000197941  | 2404         |      |
| ALB.resultn        | >= | 2.965       | TBILI.resultn | <  | 2.65        | Sodium.resultn     | =       | Missing      | 0            | 2404 |
| ALB.resultn        | >= | 2.965       | TBILI.resultn | <  | 2.65        | Sodium.resultn     | <       | 137.5        | 0.001546134  | 2404 |
| ALB.resultn        | >= | 2.965       | TBILI.resultn | <  | 2.65        | Sodium.resultn     | >=      | 137.5        | 5.79E-05     | 2404 |
| ALB.resultn        | >= | 2.965       | TBILI.resultn | >= | 2.65        |                    | Missing | -0.000178784 | 2404         |      |
| age.yrs            | =  | Missing     |               |    |             |                    | Missing | -0.000888829 | 2405         |      |
| age.yrs            | <  | 69.76043806 | ALB.resultn   | =  | Missing     |                    | Missing | -0.001779403 | 2405         |      |
| age.yrs            | <  | 69.76043806 | ALB.resultn   | <  | 3.08        |                    | Missing | -0.001208126 | 2405         |      |
| age.yrs            | <  | 69.76043806 | ALB.resultn   | >= | 3.08        | TBILI.resultn      | =       | Missing      | -0.000924986 | 2405 |
| age.yrs            | <  | 69.76043806 | ALB.resultn   | >= | 3.08        | TBILI.resultn      | <       | 1.55         | -0.001065293 | 2405 |
| age.yrs            | <  | 69.76043806 | ALB.resultn   | >= | 3.08        | TBILI.resultn      | >=      | 1.55         | 0            | 2405 |
| age.yrs            | >= | 69.76043806 |               |    |             |                    | Missing | 0.001642372  | 2405         |      |
| Hemoglobin.resultn | =  | Missing     | TBILI.resultn | =  | Missing     |                    |         | -3.04E-05    | 2406         |      |
| Hemoglobin.resultn | =  | Missing     | TBILI.resultn | <  | 1.1         |                    |         | 0.000421182  | 2406         |      |
| Hemoglobin.resultn | =  | Missing     | TBILI.resultn | >= | 1.1         |                    |         | 0.002551554  | 2406         |      |
| Hemoglobin.resultn | <  | 12.35       |               |    |             |                    |         | 0.000680608  | 2406         |      |
| Hemoglobin.resultn | >= | 12.35       | ALK.times.uln | =  | Missing     |                    |         | 0            | 2406         |      |
| Hemoglobin.resultn | >= | 12.35       | ALK.times.uln | <  | 5.859702093 |                    |         | 0.000557332  | 2406         |      |
| Hemoglobin.resultn | >= | 12.35       | ALK.times.uln | >= | 5.859702093 |                    |         | 0.00226138   | 2406         |      |
| ALB.resultn        | =  | Missing     |               |    |             |                    | Missing | -0.000751001 | 2407         |      |
| ALB.resultn        | <  | 3.03        |               |    |             |                    | Missing | 0.001444098  | 2407         |      |
| ALB.resultn        | >= | 3.03        | PLT.resultn   | =  | Missing     |                    | Missing | -0.000756021 | 2407         |      |
| ALB.resultn        | >= | 3.03        | PLT.resultn   | <  | 209.5       | ALB.resultn        | =       | Missing      | 0.000407493  | 2407 |
| ALB.resultn        | >= | 3.03        | PLT.resultn   | <  | 209.5       | ALB.resultn        | <       | 3.95         | 0.001303979  | 2407 |
| ALB.resultn        | >= | 3.03        | PLT.resultn   | <  | 209.5       | ALB.resultn        | >=      | 3.95         | 0            | 2407 |
| ALB.resultn        | >= | 3.03        | PLT.resultn   | >= | 209.5       |                    | Missing | -0.000243965 | 2407         |      |
| age.yrs            | =  | Missing     |               |    |             |                    | Missing | 0.000892063  | 2408         |      |
| age.yrs            | <  | 69.51266256 | ALK.times.uln | =  | Missing     |                    | Missing | 0.000541628  | 2408         |      |
| age.yrs            | <  | 69.51266256 | ALK.times.uln | <  | 6.02173913  | ALB.resultn        | =       | Missing      | 0            | 2408 |
| age.yrs            | <  | 69.51266256 | ALK.times.uln | <  | 6.02173913  | ALB.resultn        | <       | 3.14         | 0.000520555  | 2408 |
| age.yrs            | <  | 69.51266256 | ALK.times.uln | <  | 6.02173913  | ALB.resultn        | >=      | 3.14         | 0.00080432   | 2408 |
| age.yrs            | <  | 69.51266256 | ALK.times.uln | >= | 6.02173913  |                    | Missing | 0.001870321  | 2408         |      |
| age.yrs            | >= | 69.51266256 |               |    |             |                    | Missing | 0.00450584   | 2408         |      |
| ALK.times.uln      | =  | Missing     | AST.resultn   | =  | Missing     |                    |         | 0.001228776  | 2409         |      |
| ALK.times.uln      | =  | Missing     | AST.resultn   | <  | 86          |                    |         | 0.001706633  | 2409         |      |
| ALK.times.uln      | =  | Missing     | AST.resultn   | >= | 86          |                    |         | 0            | 2409         |      |
| ALK.times.uln      | <  | 6.443379543 | TBILI.resultn | =  | Missing     |                    |         | 0.000960739  | 2409         |      |
| ALK.times.uln      | <  | 6.443379543 | TBILI.resultn | <  | 0.65        |                    |         | -1.36E-06    | 2409         |      |
| ALK.times.uln      | <  | 6.443379543 | TBILI.resultn | >= | 0.65        |                    |         | 0.001562049  | 2409         |      |
| ALK.times.uln      | >= | 6.443379543 |               |    |             |                    |         | 0.0005487    | 2409         |      |

|               |    |                         |               |                         |               |         |              |                   |
|---------------|----|-------------------------|---------------|-------------------------|---------------|---------|--------------|-------------------|
| PLT.resultn   | =  | Missing                 |               |                         |               | Missing | -0.002769682 | 2410              |
| PLT.resultn   | <  | 249.5 ALK.times.uln     | =             | Missing                 | psc.yrs.dur   | =       | Missing      | -0.000925122 2410 |
| PLT.resultn   | <  | 249.5 ALK.times.uln     | =             | Missing                 | psc.yrs.dur   | <       | 0.425735797  | -0.002405317 2410 |
| PLT.resultn   | <  | 249.5 ALK.times.uln     | =             | Missing                 | psc.yrs.dur   | >=      | 0.425735797  | 0 2410            |
| PLT.resultn   | <  | 249.5 ALK.times.uln     | <             | 2.905037968             |               |         | Missing      | -0.002243333 2410 |
| PLT.resultn   | <  | 249.5 ALK.times.uln     | >=            | 2.905037968             |               |         | Missing      | 0.000128053 2410  |
| PLT.resultn   | >= | 249.5                   |               |                         |               |         | Missing      | -0.00212644 2410  |
| TBILL.resultn | =  | Missing                 |               |                         |               |         | Missing      | -0.001378434 2411 |
| TBILL.resultn | <  | 3.25 psc.yrs.dur        | =             | Missing                 |               |         | Missing      | -0.001977722 2411 |
| TBILL.resultn | <  | 3.25 psc.yrs.dur        | <             | 0.791238877             |               |         | Missing      | -0.002477268 2411 |
| TBILL.resultn | <  | 3.25 psc.yrs.dur        | >=            | 0.791238877             | ALK.times.uln | =       | Missing      | 0 2411            |
| TBILL.resultn | <  | 3.25 psc.yrs.dur        | >=            | 0.791238877             | ALK.times.uln | <       | 3.573913043  | -0.00217478 2411  |
| TBILL.resultn | <  | 3.25 psc.yrs.dur        | >=            | 0.791238877             | ALK.times.uln | >=      | 3.573913043  | 0.000521928 2411  |
| TBILL.resultn | >= | 3.25                    |               |                         |               |         | Missing      | -0.000142136 2411 |
| psc.yrs.dur   | =  | Missing                 |               |                         |               |         |              | 0.000354663 2412  |
| psc.yrs.dur   | <  | 6.410677618 psc.yrs.dur | =             | Missing                 |               |         |              | 0.000215743 2412  |
| psc.yrs.dur   | <  | 6.410677618 psc.yrs.dur | <             | 0.004106776             |               |         |              | 0.001710532 2412  |
| psc.yrs.dur   | <  | 6.410677618 psc.yrs.dur | >=            | 0.004106776             |               |         |              | 0 2412            |
| psc.yrs.dur   | >= | 6.410677618 psc.yrs.dur | =             | Missing                 |               |         |              | 0.001318426 2412  |
| psc.yrs.dur   | >= | 6.410677618 psc.yrs.dur | <             | 8.262833676             |               |         |              | 0.003021874 2412  |
| psc.yrs.dur   | >= | 6.410677618 psc.yrs.dur | >=            | 8.262833676             |               |         |              | 0.000426144 2412  |
| AST.resultn   | =  | Missing                 |               |                         |               |         |              | -0.002409505 2413 |
| AST.resultn   | <  | 137 TBILL.resultn       | =             | Missing                 |               |         |              | -0.001197026 2413 |
| AST.resultn   | <  | 137 TBILL.resultn       | <             | 1.65                    |               |         |              | -0.0013801 2413   |
| AST.resultn   | <  | 137 TBILL.resultn       | >=            | 1.65                    |               |         |              | 0 2413            |
| AST.resultn   | >= | 137 Hemoglobin.resultn  | =             | Missing                 |               |         |              | -0.002260456 2413 |
| AST.resultn   | >= | 137 Hemoglobin.resultn  | <             | 12.75                   |               |         |              | -0.001997194 2413 |
| AST.resultn   | >= | 137 Hemoglobin.resultn  | >=            | 12.75                   |               |         |              | -0.002421338 2413 |
| PLT.resultn   | =  | Missing                 |               |                         |               |         |              | 0.001429871 2414  |
| PLT.resultn   | <  | 217 TBILL.resultn       | =             | Missing                 |               |         |              | 0.001267458 2414  |
| PLT.resultn   | <  | 217 TBILL.resultn       | <             | 1.65                    |               |         |              | 0.001026489 2414  |
| PLT.resultn   | <  | 217 TBILL.resultn       | >=            | 1.65                    |               |         |              | 0.002165617 2414  |
| PLT.resultn   | >= | 217 TBILL.resultn       | =             | Missing                 |               |         |              | 0.00054935 2414   |
| PLT.resultn   | >= | 217 TBILL.resultn       | <             | 1.15                    |               |         |              | 0.000700746 2414  |
| PLT.resultn   | >= | 217 TBILL.resultn       | >=            | 1.15                    |               |         |              | 0 2414            |
| psc.yrs.dur   | =  | Missing                 |               |                         |               |         | Missing      | -0.00258154 2415  |
| psc.yrs.dur   | <  | 6.592744695 AST.resultn | =             | Missing                 |               |         | Missing      | -0.003526806 2415 |
| psc.yrs.dur   | <  | 6.592744695 AST.resultn | <             | 73.5 AST.resultn        |               | =       | Missing      | -0.002346133 2415 |
| psc.yrs.dur   | <  | 6.592744695 AST.resultn | <             | 73.5 AST.resultn        |               | <       | 53.5         | -0.003128177 2415 |
| psc.yrs.dur   | <  | 6.592744695 AST.resultn | <             | 73.5 AST.resultn        |               | >=      | 53.5         | 0 2415            |
| psc.yrs.dur   | <  | 6.592744695 AST.resultn | >=            | 73.5                    |               |         | Missing      | -0.003022843 2415 |
| psc.yrs.dur   | >= | 6.592744695             |               |                         |               |         | Missing      | -0.001569901 2415 |
| ALB.resultn   | =  | Missing                 |               |                         |               |         | Missing      | -0.002011374 2416 |
| ALB.resultn   | <  | 2.915                   |               |                         |               |         | Missing      | 0.000254732 2416  |
| ALB.resultn   | >= | 2.915 TBILL.resultn     | =             | Missing                 |               |         | Missing      | -0.001301434 2416 |
| ALB.resultn   | >= | 2.915 TBILL.resultn     | <             | 2.65 TBILL.resultn      |               | =       | Missing      | -0.001299945 2416 |
| ALB.resultn   | >= | 2.915 TBILL.resultn     | <             | 2.65 TBILL.resultn      |               | <       | 1.65         | -0.001398319 2416 |
| ALB.resultn   | >= | 2.915 TBILL.resultn     | <             | 2.65 TBILL.resultn      |               | >=      | 1.65         | 0 2416            |
| ALB.resultn   | >= | 2.915 TBILL.resultn     | >=            | 2.65                    |               |         | Missing      | -0.001324224 2416 |
| TBILL.resultn | =  | Missing                 |               |                         |               |         | Missing      | 0.001714997 2417  |
| TBILL.resultn | <  | 3.75 TBILL.resultn      | =             | Missing                 |               |         | Missing      | 0.000939266 2417  |
| TBILL.resultn | <  | 3.75 TBILL.resultn      | <             | 1.65                    |               |         | Missing      | 0.000929076 2417  |
| TBILL.resultn | <  | 3.75 TBILL.resultn      | >=            | 1.65 Hemoglobin.resultn |               | =       | Missing      | 0.001024183 2417  |
| TBILL.resultn | <  | 3.75 TBILL.resultn      | >=            | 1.65 Hemoglobin.resultn |               | <       | 14.35        | 0.002048367 2417  |
| TBILL.resultn | <  | 3.75 TBILL.resultn      | >=            | 1.65 Hemoglobin.resultn |               | >=      | 14.35        | 0 2417            |
| TBILL.resultn | >= | 3.75                    |               |                         |               |         | Missing      | 0.000745985 2417  |
| ALK.times.uln | =  | Missing                 | TBILL.resultn | =                       | Missing       |         |              | 0.001008472 2418  |
| ALK.times.uln | =  | Missing                 | TBILL.resultn | <                       | 1.55          |         |              | 0.000581792 2418  |
| ALK.times.uln | =  | Missing                 | TBILL.resultn | >=                      | 1.55          |         |              | 0.002971204 2418  |
| ALK.times.uln | <  | 6.02 TBILL.resultn      | =             | Missing                 |               |         |              | 0.000413097 2418  |
| ALK.times.uln | <  | 6.02 TBILL.resultn      | <             | 2.6                     |               |         |              | 0.000453334 2418  |
| ALK.times.uln | <  | 6.02 TBILL.resultn      | >=            | 2.6                     |               |         |              | 0 2418            |

|               |    |                                |    |                           |    |             |  |              |      |
|---------------|----|--------------------------------|----|---------------------------|----|-------------|--|--------------|------|
| ALK.times.uln | >= | 6.02                           |    |                           |    |             |  | 0.001880188  | 2418 |
| age.yrs       | =  | Missing                        |    |                           |    |             |  | 0.000232542  | 2419 |
| age.yrs       | <  | 60.46132786 Hemoglobin.resultn | =  | Missing                   |    |             |  | 0            | 2419 |
| age.yrs       | <  | 60.46132786 Hemoglobin.resultn | <  | 11.35                     |    |             |  | -0.000483671 | 2419 |
| age.yrs       | <  | 60.46132786 Hemoglobin.resultn | >= | 11.35                     |    |             |  | 5.00E-05     | 2419 |
| age.yrs       | >= | 60.46132786 psc.yrs.dur        | =  | Missing                   |    |             |  | 0.001747096  | 2419 |
| age.yrs       | >= | 60.46132786 psc.yrs.dur        | <  | 0.774811773               |    |             |  | -2.47E-05    | 2419 |
| age.yrs       | >= | 60.46132786 psc.yrs.dur        | >= | 0.774811773               |    |             |  | 0.004472871  | 2419 |
| ALK.times.uln | =  | Missing                        |    |                           |    | Missing     |  | 0.00099006   | 2420 |
| ALK.times.uln | <  | 7.850310559 AST.resultn        | =  | Missing                   |    | Missing     |  | 0.000981164  | 2420 |
| ALK.times.uln | <  | 7.850310559 AST.resultn        | <  | 107.5                     |    | Missing     |  | 0.000787451  | 2420 |
| ALK.times.uln | <  | 7.850310559 AST.resultn        | >= | 107.5 PLT.resultn         | =  | Missing     |  | 0.001838198  | 2420 |
| ALK.times.uln | <  | 7.850310559 AST.resultn        | >= | 107.5 PLT.resultn         | <  | 275.5       |  | 0.003921488  | 2420 |
| ALK.times.uln | <  | 7.850310559 AST.resultn        | >= | 107.5 PLT.resultn         | >= | 275.5       |  | 0            | 2420 |
| ALK.times.uln | >= | 7.850310559                    |    |                           |    | Missing     |  | 0.00064889   | 2420 |
| ALB.resultn   | =  | Missing psc.yrs.dur            | =  | Missing                   |    |             |  | 0.001776029  | 2421 |
| ALB.resultn   | =  | Missing psc.yrs.dur            | <  | 0.130047912               |    |             |  | 0.005683292  | 2421 |
| ALB.resultn   | =  | Missing psc.yrs.dur            | >= | 0.130047912               |    |             |  | 0            | 2421 |
| ALB.resultn   | <  | 3.31 psc.yrs.dur               | =  | Missing                   |    |             |  | 0.001918702  | 2421 |
| ALB.resultn   | <  | 3.31 psc.yrs.dur               | <  | 1.869952088               |    |             |  | 0.000476497  | 2421 |
| ALB.resultn   | <  | 3.31 psc.yrs.dur               | >= | 1.869952088               |    |             |  | 0.003649348  | 2421 |
| ALB.resultn   | >= | 3.31                           |    |                           |    |             |  | 0.000773669  | 2421 |
| psc.yrs.dur   | =  | Missing                        |    |                           |    | Missing     |  | -0.002346063 | 2422 |
| psc.yrs.dur   | <  | 1.397672827                    |    |                           |    | Missing     |  | -0.002562613 | 2422 |
| psc.yrs.dur   | >= | 1.397672827 age.yrs            | =  | Missing                   |    | Missing     |  | -0.001907807 | 2422 |
| psc.yrs.dur   | >= | 1.397672827 age.yrs            | <  | 51.63175907               |    | Missing     |  | -0.00209457  | 2422 |
| psc.yrs.dur   | >= | 1.397672827 age.yrs            | >= | 51.63175907 AST.resultn   | =  | Missing     |  | -0.001534279 | 2422 |
| psc.yrs.dur   | >= | 1.397672827 age.yrs            | >= | 51.63175907 AST.resultn   | <  | 52.5        |  | -0.003068558 | 2422 |
| psc.yrs.dur   | >= | 1.397672827 age.yrs            | >= | 51.63175907 AST.resultn   | >= | 52.5        |  | 0            | 2422 |
| age.yrs       | =  | Missing                        |    |                           |    | Missing     |  | -0.001625773 | 2423 |
| age.yrs       | <  | 69.76043806 ALK.times.uln      | =  | Missing                   |    | Missing     |  | -0.002130004 | 2423 |
| age.yrs       | <  | 69.76043806 ALK.times.uln      | <  | 7.868810472 ALK.times.uln | =  | Missing     |  | -0.001594107 | 2423 |
| age.yrs       | <  | 69.76043806 ALK.times.uln      | <  | 7.868810472 ALK.times.uln | <  | 5.553849372 |  | -0.001689562 | 2423 |
| age.yrs       | <  | 69.76043806 ALK.times.uln      | <  | 7.868810472 ALK.times.uln | >= | 5.553849372 |  | 0            | 2423 |
| age.yrs       | <  | 69.76043806 ALK.times.uln      | >= | 7.868810472               |    | Missing     |  | -0.002124299 | 2423 |
| age.yrs       | >= | 69.76043806                    |    |                           |    | Missing     |  | 0.000884881  | 2423 |
| PLT.resultn   | =  | Missing                        |    |                           |    | Missing     |  | -0.000737205 | 2424 |
| PLT.resultn   | <  | 286.5 psc.yrs.dur              | =  | Missing                   |    | Missing     |  | -0.000910131 | 2424 |
| PLT.resultn   | <  | 286.5 psc.yrs.dur              | <  | 0.001368925               |    | Missing     |  | 0.002036801  | 2424 |
| PLT.resultn   | <  | 286.5 psc.yrs.dur              | >= | 0.001368925 age.yrs       | =  | Missing     |  | -0.001174035 | 2424 |
| PLT.resultn   | <  | 286.5 psc.yrs.dur              | >= | 0.001368925 age.yrs       | <  | 51.58521561 |  | -0.001787735 | 2424 |
| PLT.resultn   | <  | 286.5 psc.yrs.dur              | >= | 0.001368925 age.yrs       | >= | 51.58521561 |  | 0            | 2424 |
| PLT.resultn   | >= | 286.5                          |    |                           |    | Missing     |  | -0.001656191 | 2424 |
| ALK.times.uln | =  | Missing                        |    |                           |    |             |  | 3.78E-05     | 2425 |
| ALK.times.uln | <  | 5.462893197 Sodium.resultn     | =  | Missing                   |    |             |  | 0            | 2425 |
| ALK.times.uln | <  | 5.462893197 Sodium.resultn     | <  | 137.5                     |    |             |  | 0.003278521  | 2425 |
| ALK.times.uln | <  | 5.462893197 Sodium.resultn     | >= | 137.5                     |    |             |  | -0.000551583 | 2425 |
| ALK.times.uln | >= | 5.462893197 ALK.times.uln      | =  | Missing                   |    |             |  | 0.001311943  | 2425 |
| ALK.times.uln | >= | 5.462893197 ALK.times.uln      | <  | 7.861978174               |    |             |  | 0.002507747  | 2425 |
| ALK.times.uln | >= | 5.462893197 ALK.times.uln      | >= | 7.861978174               |    |             |  | 0.000116138  | 2425 |
| PLT.resultn   | =  | Missing                        |    |                           |    |             |  | 0.000234728  | 2426 |
| PLT.resultn   | <  | 186 AST.resultn                | =  | Missing                   |    |             |  | 0.001161564  | 2426 |
| PLT.resultn   | <  | 186 AST.resultn                | <  | 57                        |    |             |  | -0.000428085 | 2426 |
| PLT.resultn   | <  | 186 AST.resultn                | >= | 57                        |    |             |  | 0.002486271  | 2426 |
| PLT.resultn   | >= | 186 TBILL.resultn              | =  | Missing                   |    |             |  | 0.000474413  | 2426 |
| PLT.resultn   | >= | 186 TBILL.resultn              | <  | 4.5                       |    |             |  | 0.000499919  | 2426 |
| PLT.resultn   | >= | 186 TBILL.resultn              | >= | 4.5                       |    |             |  | 0            | 2426 |
| TBILL.resultn | =  | Missing                        |    |                           |    | Missing     |  | -0.001335287 | 2427 |
| TBILL.resultn | <  | 0.95                           |    |                           |    | Missing     |  | -0.001693952 | 2427 |
| TBILL.resultn | >= | 0.95 Hemoglobin.resultn        | =  | Missing                   |    | Missing     |  | 0.000454801  | 2427 |
| TBILL.resultn | >= | 0.95 Hemoglobin.resultn        | <  | 14.95 ALB.resultn         | =  | Missing     |  | -0.000658497 | 2427 |
| TBILL.resultn | >= | 0.95 Hemoglobin.resultn        | <  | 14.95 ALB.resultn         | <  | 4.065       |  | -0.001132614 | 2427 |

|                |    |                           |    |                          |         |             |              |      |
|----------------|----|---------------------------|----|--------------------------|---------|-------------|--------------|------|
| TBIL.resultn   | >= | 0.95 Hemoglobin.resultn   | <  | 14.95 ALB.resultn        | >=      | 4.065       | 0            | 2427 |
| TBIL.resultn   | >= | 0.95 Hemoglobin.resultn   | >= | 14.95                    | Missing |             | -0.002046951 | 2427 |
| psc.yrs.dur    | =  | Missing                   |    |                          | Missing |             | -0.001865623 | 2428 |
| psc.yrs.dur    | <  | 1.961670089               |    |                          | Missing |             | -0.002098937 | 2428 |
| psc.yrs.dur    | >= | 1.961670089 ALB.resultn   | =  | Missing                  | Missing |             | -0.001358167 | 2428 |
| psc.yrs.dur    | >= | 1.961670089 ALB.resultn   | <  | 3.35                     | Missing |             | -0.00029453  | 2428 |
| psc.yrs.dur    | >= | 1.961670089 ALB.resultn   | >= | 3.35 age.yrs             | =       | Missing     | -0.001606349 | 2428 |
| psc.yrs.dur    | >= | 1.961670089 ALB.resultn   | >= | 3.35 age.yrs             | <       | 53.35934292 | -0.002241417 | 2428 |
| psc.yrs.dur    | >= | 1.961670089 ALB.resultn   | >= | 3.35 age.yrs             | >=      | 53.35934292 | 0            | 2428 |
| ALK.times.uln  | =  | Missing                   |    |                          | Missing |             | 1.82E-05     | 2429 |
| ALK.times.uln  | <  | 6.02 psc.yrs.dur          | =  | Missing                  | Missing |             | -6.63E-05    | 2429 |
| ALK.times.uln  | <  | 6.02 psc.yrs.dur          | <  | 2.05065024               | Missing |             | -0.000331763 | 2429 |
| ALK.times.uln  | <  | 6.02 psc.yrs.dur          | >= | 2.05065024 psc.yrs.dur   | =       | Missing     | 0.000724513  | 2429 |
| ALK.times.uln  | <  | 6.02 psc.yrs.dur          | >= | 2.05065024 psc.yrs.dur   | <       | 3.080082136 | 0.003332759  | 2429 |
| ALK.times.uln  | <  | 6.02 psc.yrs.dur          | >= | 2.05065024 psc.yrs.dur   | >=      | 3.080082136 | 0            | 2429 |
| ALK.times.uln  | >= | 6.02                      |    |                          | Missing |             | 0.001362798  | 2429 |
| ALK.times.uln  | =  | Missing TBIL.resultn      | =  | Missing                  |         |             | 0            | 2430 |
| ALK.times.uln  | =  | Missing TBIL.resultn      | <  | 0.75                     |         |             | -7.39E-05    | 2430 |
| ALK.times.uln  | =  | Missing TBIL.resultn      | >= | 0.75                     |         |             | 0.001896715  | 2430 |
| ALK.times.uln  | <  | 5.963877551 TBIL.resultn  | =  | Missing                  |         |             | 0.000554631  | 2430 |
| ALK.times.uln  | <  | 5.963877551 TBIL.resultn  | <  | 1.35                     |         |             | 0.000555482  | 2430 |
| ALK.times.uln  | <  | 5.963877551 TBIL.resultn  | >= | 1.35                     |         |             | 0.000551175  | 2430 |
| ALK.times.uln  | >= | 5.963877551               |    |                          |         |             | 0.001524951  | 2430 |
| psc.yrs.dur    | =  | Missing                   |    |                          |         |             | 0.000253161  | 2431 |
| psc.yrs.dur    | <  | 6.410677618 ALB.resultn   | =  | Missing                  |         |             | 0            | 2431 |
| psc.yrs.dur    | <  | 6.410677618 ALB.resultn   | <  | 4.25                     |         |             | -0.000445823 | 2431 |
| psc.yrs.dur    | <  | 6.410677618 ALB.resultn   | >= | 4.25                     |         |             | 0.001138361  | 2431 |
| psc.yrs.dur    | >= | 6.410677618 psc.yrs.dur   | =  | Missing                  |         |             | 0.001132245  | 2431 |
| psc.yrs.dur    | >= | 6.410677618 psc.yrs.dur   | <  | 10.04654346              |         |             | 0.002515609  | 2431 |
| psc.yrs.dur    | >= | 6.410677618 psc.yrs.dur   | >= | 10.04654346              |         |             | -0.000164659 | 2431 |
| AST.resultn    | =  | Missing                   |    |                          | Missing |             | -0.001680325 | 2432 |
| AST.resultn    | <  | 211.5 AST.resultn         | =  | Missing                  | Missing |             | -0.000788492 | 2432 |
| AST.resultn    | <  | 211.5 AST.resultn         | <  | 144.5 TBIL.resultn       | =       | Missing     | -0.000742177 | 2432 |
| AST.resultn    | <  | 211.5 AST.resultn         | <  | 144.5 TBIL.resultn       | <       | 1.65        | -0.000837942 | 2432 |
| AST.resultn    | <  | 211.5 AST.resultn         | <  | 144.5 TBIL.resultn       | >=      | 1.65        | 0            | 2432 |
| AST.resultn    | <  | 211.5 AST.resultn         | >= | 144.5                    | Missing |             | -0.001449248 | 2432 |
| AST.resultn    | >= | 211.5                     |    |                          | Missing |             | 0.000492924  | 2432 |
| psc.yrs.dur    | =  | Missing                   |    |                          | Missing |             | 0.000978405  | 2433 |
| psc.yrs.dur    | <  | 0.042436687 ALK.times.uln | =  | Missing                  | Missing |             | 0.001695287  | 2433 |
| psc.yrs.dur    | <  | 0.042436687 ALK.times.uln | <  | 3.904220484 TBIL.resultn | =       | Missing     | 0.001478046  | 2433 |
| psc.yrs.dur    | <  | 0.042436687 ALK.times.uln | <  | 3.904220484 TBIL.resultn | <       | 0.75        | 0.003399506  | 2433 |
| psc.yrs.dur    | <  | 0.042436687 ALK.times.uln | <  | 3.904220484 TBIL.resultn | >=      | 0.75        | 0            | 2433 |
| psc.yrs.dur    | <  | 0.042436687 ALK.times.uln | >= | 3.904220484              | Missing |             | 0.002216666  | 2433 |
| psc.yrs.dur    | >= | 0.042436687               |    |                          | Missing |             | 0.000852287  | 2433 |
| Sodium.resultn | =  | Missing                   |    |                          | Missing |             | 0.000222285  | 2434 |
| Sodium.resultn | <  | 136.5                     |    |                          | Missing |             | 0.001620842  | 2434 |
| Sodium.resultn | >= | 136.5 psc.yrs.dur         | =  | Missing                  | Missing |             | 0.000495284  | 2434 |
| Sodium.resultn | >= | 136.5 psc.yrs.dur         | <  | 7.728952772 PLT.resultn  | =       | Missing     | 0.000559965  | 2434 |
| Sodium.resultn | >= | 136.5 psc.yrs.dur         | <  | 7.728952772 PLT.resultn  | <       | 245.5       | 0.001353249  | 2434 |
| Sodium.resultn | >= | 136.5 psc.yrs.dur         | <  | 7.728952772 PLT.resultn  | >=      | 245.5       | 0            | 2434 |
| Sodium.resultn | >= | 136.5 psc.yrs.dur         | >= | 7.728952772              | Missing |             | 5.69E-05     | 2434 |
| age.yrs        | =  | Missing                   |    |                          | Missing |             | -0.000972374 | 2435 |
| age.yrs        | <  | 69.84257358 ALK.times.uln | =  | Missing                  | Missing |             | -0.000714628 | 2435 |
| age.yrs        | <  | 69.84257358 ALK.times.uln | <  | 6.291692182 TBIL.resultn | =       | Missing     | -0.001257245 | 2435 |
| age.yrs        | <  | 69.84257358 ALK.times.uln | <  | 6.291692182 TBIL.resultn | <       | 2.75        | -0.001335823 | 2435 |
| age.yrs        | <  | 69.84257358 ALK.times.uln | <  | 6.291692182 TBIL.resultn | >=      | 2.75        | 0            | 2435 |
| age.yrs        | <  | 69.84257358 ALK.times.uln | >= | 6.291692182              | Missing |             | -0.001463377 | 2435 |
| age.yrs        | >= | 69.84257358               |    |                          | Missing |             | 0.002928916  | 2435 |
| psc.yrs.dur    | =  | Missing                   |    |                          |         |             | -0.004359666 | 2436 |
| psc.yrs.dur    | <  | 6.783025325 age.yrs       | =  | Missing                  |         |             | -0.004479974 | 2436 |
| psc.yrs.dur    | <  | 6.783025325 age.yrs       | <  | 68.91718001              |         |             | -0.004693306 | 2436 |
| psc.yrs.dur    | <  | 6.783025325 age.yrs       | >= | 68.91718001              |         |             | 0            | 2436 |

|                |    |             |                    |    |             |               |    |              |              |      |
|----------------|----|-------------|--------------------|----|-------------|---------------|----|--------------|--------------|------|
| psc.yrs.dur    | >= | 6.783025325 | psc.yrs.dur        | =  | Missing     |               |    | -0.003581204 | 2436         |      |
| psc.yrs.dur    | >= | 6.783025325 | psc.yrs.dur        | <  | 9.58384668  |               |    | -0.0018864   | 2436         |      |
| psc.yrs.dur    | >= | 6.783025325 | psc.yrs.dur        | >= | 9.58384668  |               |    | -0.004767566 | 2436         |      |
| ALK.times.uln  | =  | Missing     | ALB.resultn        | =  | Missing     |               |    | -0.000410499 | 2437         |      |
| ALK.times.uln  | =  | Missing     | ALB.resultn        | <  | 3.95        |               |    | 0.001985091  | 2437         |      |
| ALK.times.uln  | =  | Missing     | ALB.resultn        | >= | 3.95        |               |    | -0.000382019 | 2437         |      |
| ALK.times.uln  | <  | 7.38718366  | Sodium.resultn     | =  | Missing     |               |    | 0            | 2437         |      |
| ALK.times.uln  | <  | 7.38718366  | Sodium.resultn     | <  | 137.5       |               |    | 0.001805234  | 2437         |      |
| ALK.times.uln  | <  | 7.38718366  | Sodium.resultn     | >= | 137.5       |               |    | 0.000413932  | 2437         |      |
| ALK.times.uln  | >= | 7.38718366  |                    |    |             |               |    | 0.000226026  | 2437         |      |
| age.yrs        | =  | Missing     |                    |    |             | Missing       |    | 0.000402849  | 2438         |      |
| age.yrs        | <  | 69.84257358 | ALK.times.uln      | =  | Missing     | age.yrs       | =  | Missing      | 0.000508804  | 2438 |
| age.yrs        | <  | 69.84257358 | ALK.times.uln      | =  | Missing     | age.yrs       | <  | 55.80424367  | 0.000642062  | 2438 |
| age.yrs        | <  | 69.84257358 | ALK.times.uln      | =  | Missing     | age.yrs       | >= | 55.80424367  | 0            | 2438 |
| age.yrs        | <  | 69.84257358 | ALK.times.uln      | <  | 6.02        |               |    | Missing      | 6.19E-05     | 2438 |
| age.yrs        | <  | 69.84257358 | ALK.times.uln      | >= | 6.02        |               |    | Missing      | 0.00144928   | 2438 |
| age.yrs        | >= | 69.84257358 |                    |    |             |               |    | Missing      | 0.003339994  | 2438 |
| TBILL.resultn  | =  | Missing     |                    |    |             |               |    | 0.00051701   | 2439         |      |
| TBILL.resultn  | <  | 2.05        | ALK.times.uln      | =  | Missing     |               |    | 0            | 2439         |      |
| TBILL.resultn  | <  | 2.05        | ALK.times.uln      | <  | 7.437755102 |               |    | -0.000807599 | 2439         |      |
| TBILL.resultn  | <  | 2.05        | ALK.times.uln      | >= | 7.437755102 |               |    | 0.001577775  | 2439         |      |
| TBILL.resultn  | >= | 2.05        | Hemoglobin.resultn | =  | Missing     |               |    | 0.000101363  | 2439         |      |
| TBILL.resultn  | >= | 2.05        | Hemoglobin.resultn | <  | 12.9        |               |    | 0.000432979  | 2439         |      |
| TBILL.resultn  | >= | 2.05        | Hemoglobin.resultn | >= | 12.9        |               |    | -0.000159192 | 2439         |      |
| ALK.times.uln  | =  | Missing     | psc.yrs.dur        | =  | Missing     |               |    | -0.000641594 | 2440         |      |
| ALK.times.uln  | =  | Missing     | psc.yrs.dur        | <  | 0.399726215 |               |    | -0.001504427 | 2440         |      |
| ALK.times.uln  | =  | Missing     | psc.yrs.dur        | >= | 0.399726215 |               |    | 0            | 2440         |      |
| ALK.times.uln  | <  | 7.850310559 | TBILL.resultn      | =  | Missing     |               |    | -0.000627027 | 2440         |      |
| ALK.times.uln  | <  | 7.850310559 | TBILL.resultn      | <  | 2.45        |               |    | -0.000701365 | 2440         |      |
| ALK.times.uln  | <  | 7.850310559 | TBILL.resultn      | >= | 2.45        |               |    | 0.000146084  | 2440         |      |
| ALK.times.uln  | >= | 7.850310559 |                    |    |             |               |    | -0.001394779 | 2440         |      |
| ALK.times.uln  | =  | Missing     |                    |    |             |               |    | -0.003538484 | 2441         |      |
| ALK.times.uln  | <  | 5.462893197 | age.yrs            | =  | Missing     |               |    | -0.003319204 | 2441         |      |
| ALK.times.uln  | <  | 5.462893197 | age.yrs            | <  | 67.67419576 |               |    | -0.00352928  | 2441         |      |
| ALK.times.uln  | <  | 5.462893197 | age.yrs            | >= | 67.67419576 |               |    | 0            | 2441         |      |
| ALK.times.uln  | >= | 5.462893197 | TBILL.resultn      | =  | Missing     |               |    | -0.002471134 | 2441         |      |
| ALK.times.uln  | >= | 5.462893197 | TBILL.resultn      | <  | 1.35        |               |    | -0.002922293 | 2441         |      |
| ALK.times.uln  | >= | 5.462893197 | TBILL.resultn      | >= | 1.35        |               |    | -0.002020388 | 2441         |      |
| age.yrs        | =  | Missing     |                    |    |             |               |    | -6.34E-05    | 2442         |      |
| age.yrs        | <  | 63.31143053 | PLT.resultn        | =  | Missing     |               |    | 0            | 2442         |      |
| age.yrs        | <  | 63.31143053 | PLT.resultn        | <  | 197.5       |               |    | 0.000727293  | 2442         |      |
| age.yrs        | <  | 63.31143053 | PLT.resultn        | >= | 197.5       |               |    | -0.0002931   | 2442         |      |
| age.yrs        | >= | 63.31143053 | AST.resultn        | =  | Missing     |               |    | 0.000408043  | 2442         |      |
| age.yrs        | >= | 63.31143053 | AST.resultn        | <  | 51          |               |    | -0.000820148 | 2442         |      |
| age.yrs        | >= | 63.31143053 | AST.resultn        | >= | 51          |               |    | 0.001971196  | 2442         |      |
| Sodium.resultn | =  | Missing     |                    |    |             | Missing       |    | 0.000795756  | 2443         |      |
| Sodium.resultn | <  | 136.5       |                    |    |             | Missing       |    | 0.002517912  | 2443         |      |
| Sodium.resultn | >= | 136.5       | age.yrs            | =  | Missing     |               |    | 0.000631034  | 2443         |      |
| Sodium.resultn | >= | 136.5       | age.yrs            | <  | 63.21560575 | ALK.times.uln | =  | Missing      | 0            | 2443 |
| Sodium.resultn | >= | 136.5       | age.yrs            | <  | 63.21560575 | ALK.times.uln | <  | 5.374535331  | 0.000393189  | 2443 |
| Sodium.resultn | >= | 136.5       | age.yrs            | <  | 63.21560575 | ALK.times.uln | >= | 5.374535331  | 0.000308902  | 2443 |
| Sodium.resultn | >= | 136.5       | age.yrs            | >= | 63.21560575 |               |    | Missing      | 0.003108026  | 2443 |
| PLT.resultn    | =  | Missing     |                    |    |             |               |    | Missing      | -0.000354404 | 2444 |
| PLT.resultn    | <  | 173.5       |                    |    |             |               |    | Missing      | 0.00170722   | 2444 |
| PLT.resultn    | >= | 173.5       | ALB.resultn        | =  | Missing     |               |    | Missing      | 0.001708183  | 2444 |
| PLT.resultn    | >= | 173.5       | ALB.resultn        | <  | 3.245       |               |    | Missing      | -0.000778858 | 2444 |
| PLT.resultn    | >= | 173.5       | ALB.resultn        | >= | 3.245       | TBILL.resultn | =  | Missing      | -0.000686949 | 2444 |
| PLT.resultn    | >= | 173.5       | ALB.resultn        | >= | 3.245       | TBILL.resultn | <  | 1.15         | -0.000901621 | 2444 |
| PLT.resultn    | >= | 173.5       | ALB.resultn        | >= | 3.245       | TBILL.resultn | >= | 1.15         | 0            | 2444 |
| psc.yrs.dur    | =  | Missing     |                    |    |             |               |    | Missing      | -0.000732344 | 2445 |
| psc.yrs.dur    | <  | 1.961670089 |                    |    |             |               |    | Missing      | -0.000975504 | 2445 |
| psc.yrs.dur    | >= | 1.961670089 | AST.resultn        | =  | Missing     |               |    | Missing      | -0.000289253 | 2445 |

|                |    |             |                |    |             |                |              |         |              |      |
|----------------|----|-------------|----------------|----|-------------|----------------|--------------|---------|--------------|------|
| psc.yrs.dur    | >= | 1.961670089 | AST.resultn    | <  | 44.5        | Missing        | -0.001375219 | 2445    |              |      |
| psc.yrs.dur    | >= | 1.961670089 | AST.resultn    | >= | 44.5        | Sodium.resultn | =            | Missing | 0            | 2445 |
| psc.yrs.dur    | >= | 1.961670089 | AST.resultn    | >= | 44.5        | Sodium.resultn | <            | 140.5   | 0.000870471  | 2445 |
| psc.yrs.dur    | >= | 1.961670089 | AST.resultn    | >= | 44.5        | Sodium.resultn | >=           | 140.5   | -0.00023413  | 2445 |
| Sodium.resultn | =  | Missing     |                |    |             | Missing        |              | Missing | -0.00049407  | 2446 |
| Sodium.resultn | <  | 136.5       |                |    |             | Missing        |              | Missing | 0.001214966  | 2446 |
| Sodium.resultn | >= | 136.5       | ALB.resultn    | =  | Missing     |                |              | Missing | -3.17E-05    | 2446 |
| Sodium.resultn | >= | 136.5       | ALB.resultn    | <  | 3.62        | PLT.resultn    | =            | Missing | 0.000751468  | 2446 |
| Sodium.resultn | >= | 136.5       | ALB.resultn    | <  | 3.62        | PLT.resultn    | <            | 243     | 0.002003916  | 2446 |
| Sodium.resultn | >= | 136.5       | ALB.resultn    | <  | 3.62        | PLT.resultn    | >=           | 243     | 0            | 2446 |
| Sodium.resultn | >= | 136.5       | ALB.resultn    | >= | 3.62        |                |              | Missing | -0.000292782 | 2446 |
| ALK.times.uln  | =  | Missing     | age.yrs        | =  | Missing     |                |              |         | 0.001194051  | 2447 |
| ALK.times.uln  | =  | Missing     | age.yrs        | <  | 56.56125941 |                |              |         | 0.001428178  | 2447 |
| ALK.times.uln  | =  | Missing     | age.yrs        | >= | 56.56125941 |                |              |         | 0            | 2447 |
| ALK.times.uln  | <  | 6.068877551 | TBILL.resultn  | =  | Missing     |                |              |         | -0.000299933 | 2447 |
| ALK.times.uln  | <  | 6.068877551 | TBILL.resultn  | <  | 3           |                |              |         | -0.000401672 | 2447 |
| ALK.times.uln  | <  | 6.068877551 | TBILL.resultn  | >= | 3           |                |              |         | 0.001429628  | 2447 |
| ALK.times.uln  | >= | 6.068877551 |                |    |             |                |              |         | 0.001563289  | 2447 |
| ALK.times.uln  | =  | Missing     | TBILL.resultn  | =  | Missing     |                |              |         | 6.37E-05     | 2448 |
| ALK.times.uln  | =  | Missing     | TBILL.resultn  | <  | 1.15        |                |              |         | -0.000342372 | 2448 |
| ALK.times.uln  | =  | Missing     | TBILL.resultn  | >= | 1.15        |                |              |         | 0.001349721  | 2448 |
| ALK.times.uln  | <  | 6.115825908 | Sodium.resultn | =  | Missing     |                |              |         | 0            | 2448 |
| ALK.times.uln  | <  | 6.115825908 | Sodium.resultn | <  | 138.5       |                |              |         | 0.001618485  | 2448 |
| ALK.times.uln  | <  | 6.115825908 | Sodium.resultn | >= | 138.5       |                |              |         | -0.000324078 | 2448 |
| ALK.times.uln  | >= | 6.115825908 |                |    |             |                |              |         | 0.001698235  | 2448 |
| age.yrs        | =  | Missing     |                |    |             | Missing        |              |         | -0.003227622 | 2449 |
| age.yrs        | <  | 68.1724846  | PLT.resultn    | =  | Missing     |                |              | Missing | -0.00419687  | 2449 |
| age.yrs        | <  | 68.1724846  | PLT.resultn    | <  | 249.5       | PLT.resultn    | =            | Missing | -0.002680045 | 2449 |
| age.yrs        | <  | 68.1724846  | PLT.resultn    | <  | 249.5       | PLT.resultn    | <            | 243.5   | -0.00301505  | 2449 |
| age.yrs        | <  | 68.1724846  | PLT.resultn    | <  | 249.5       | PLT.resultn    | >=           | 243.5   | 0            | 2449 |
| age.yrs        | <  | 68.1724846  | PLT.resultn    | >= | 249.5       |                |              | Missing | -0.003535799 | 2449 |
| age.yrs        | >= | 68.1724846  |                |    |             |                |              | Missing | -0.001492778 | 2449 |
| ALK.times.uln  | =  | Missing     | age.yrs        | =  | Missing     |                |              | Missing | 0.000420432  | 2450 |
| ALK.times.uln  | =  | Missing     | age.yrs        | <  | 55.54277892 | TBILL.resultn  | =            | Missing | 0            | 2450 |
| ALK.times.uln  | =  | Missing     | age.yrs        | <  | 55.54277892 | TBILL.resultn  | <            | 1.3     | -1.34E-07    | 2450 |
| ALK.times.uln  | =  | Missing     | age.yrs        | <  | 55.54277892 | TBILL.resultn  | >=           | 1.3     | 0.002350269  | 2450 |
| ALK.times.uln  | =  | Missing     | age.yrs        | >= | 55.54277892 |                |              | Missing | 0.000318161  | 2450 |
| ALK.times.uln  | <  | 5.85        |                |    |             |                |              | Missing | 0.001008715  | 2450 |
| ALK.times.uln  | >= | 5.85        |                |    |             |                |              | Missing | 0.001653294  | 2450 |
| psc.yrs.dur    | =  | Missing     |                |    |             |                |              |         | 5.94E-05     | 2451 |
| psc.yrs.dur    | <  | 6.379192334 | ALK.times.uln  | =  | Missing     |                |              |         | 0            | 2451 |
| psc.yrs.dur    | <  | 6.379192334 | ALK.times.uln  | <  | 4.197652174 |                |              |         | 0.000205872  | 2451 |
| psc.yrs.dur    | <  | 6.379192334 | ALK.times.uln  | >= | 4.197652174 |                |              |         | -0.000911137 | 2451 |
| psc.yrs.dur    | >= | 6.379192334 | AST.resultn    | =  | Missing     |                |              |         | 0.000297783  | 2451 |
| psc.yrs.dur    | >= | 6.379192334 | AST.resultn    | <  | 47.5        |                |              |         | -0.000910056 | 2451 |
| psc.yrs.dur    | >= | 6.379192334 | AST.resultn    | >= | 47.5        |                |              |         | 0.001718771  | 2451 |
| AST.resultn    | =  | Missing     |                |    |             |                |              | Missing | -0.001241997 | 2452 |
| AST.resultn    | <  | 70.5        | AST.resultn    | =  | Missing     |                |              | Missing | -0.001004947 | 2452 |
| AST.resultn    | <  | 70.5        | AST.resultn    | <  | 43          |                |              | Missing | -0.00222393  | 2452 |
| AST.resultn    | <  | 70.5        | AST.resultn    | >= | 43          | Sodium.resultn | =            | Missing | 0            | 2452 |
| AST.resultn    | <  | 70.5        | AST.resultn    | >= | 43          | Sodium.resultn | <            | 137.5   | 0.005499946  | 2452 |
| AST.resultn    | <  | 70.5        | AST.resultn    | >= | 43          | Sodium.resultn | >=           | 137.5   | -0.000477104 | 2452 |
| AST.resultn    | >= | 70.5        |                |    |             |                |              | Missing | -0.001609918 | 2452 |
| psc.yrs.dur    | =  | Missing     |                |    |             |                |              |         | 0.000868158  | 2453 |
| psc.yrs.dur    | <  | 6.258726899 | PLT.resultn    | =  | Missing     |                |              |         | 0            | 2453 |
| psc.yrs.dur    | <  | 6.258726899 | PLT.resultn    | <  | 271         |                |              |         | 0.001406768  | 2453 |
| psc.yrs.dur    | <  | 6.258726899 | PLT.resultn    | >= | 271         |                |              |         | 3.09E-05     | 2453 |
| psc.yrs.dur    | >= | 6.258726899 | AST.resultn    | =  | Missing     |                |              |         | 0.001525531  | 2453 |
| psc.yrs.dur    | >= | 6.258726899 | AST.resultn    | <  | 42          |                |              |         | 9.47E-05     | 2453 |
| psc.yrs.dur    | >= | 6.258726899 | AST.resultn    | >= | 42          |                |              |         | 0.003135169  | 2453 |
| ALK.times.uln  | =  | Missing     |                |    |             |                |              | Missing | 0.000378801  | 2454 |
| ALK.times.uln  | <  | 6.068687487 | TBILL.resultn  | =  | Missing     |                |              | Missing | -0.00052261  | 2454 |

|               |    |             |                    |    |             |                |           |              |                   |
|---------------|----|-------------|--------------------|----|-------------|----------------|-----------|--------------|-------------------|
| ALK.times.uln | <  | 6.068687487 | TBILL.resultn      | <  | 0.75        |                | Missing   | -0.001072319 | 2454              |
| ALK.times.uln | <  | 6.068687487 | TBILL.resultn      | >= | 0.75        | Sodium.resultn | = Missing | 0            | 2454              |
| ALK.times.uln | <  | 6.068687487 | TBILL.resultn      | >= | 0.75        | Sodium.resultn | <         | 137.5        | 0.002317481 2454  |
| ALK.times.uln | <  | 6.068687487 | TBILL.resultn      | >= | 0.75        | Sodium.resultn | >=        | 137.5        | -0.000712252 2454 |
| ALK.times.uln | >= | 6.068687487 |                    |    |             |                | Missing   | -0.000368235 | 2454              |
| PLT.resultn   | =  | Missing     | psc.yrs.dur        | =  | Missing     |                |           | -0.000424658 | 2455              |
| PLT.resultn   | =  | Missing     | psc.yrs.dur        | <  | 0.280629706 |                |           | -0.001746662 | 2455              |
| PLT.resultn   | =  | Missing     | psc.yrs.dur        | >= | 0.280629706 |                |           | 0.002087149  | 2455              |
| PLT.resultn   | <  | 170         |                    |    |             |                |           | 0.001323936  | 2455              |
| PLT.resultn   | >= | 170         | Hemoglobin.resultn | =  | Missing     |                |           | 0            | 2455              |
| PLT.resultn   | >= | 170         | Hemoglobin.resultn | <  | 11.95       |                |           | -0.001187164 | 2455              |
| PLT.resultn   | >= | 170         | Hemoglobin.resultn | >= | 11.95       |                |           | -0.001020211 | 2455              |
| ALB.resultn   | =  | Missing     | AST.resultn        | =  | Missing     |                |           | -0.002287592 | 2456              |
| ALB.resultn   | =  | Missing     | AST.resultn        | <  | 58.5        |                |           | 0.004193918  | 2456              |
| ALB.resultn   | =  | Missing     | AST.resultn        | >= | 58.5        |                |           | 0            | 2456              |
| ALB.resultn   | <  | 2.95        |                    |    |             |                |           | 0.001832256  | 2456              |
| ALB.resultn   | >= | 2.95        | TBILL.resultn      | =  | Missing     |                |           | 0.00088562   | 2456              |
| ALB.resultn   | >= | 2.95        | TBILL.resultn      | <  | 2.55        |                |           | 0.000951543  | 2456              |
| ALB.resultn   | >= | 2.95        | TBILL.resultn      | >= | 2.55        |                |           | -2.14E-06    | 2456              |
| age.yrs       | =  | Missing     |                    |    |             |                | Missing   | 4.02E-05     | 2457              |
| age.yrs       | <  | 68.62970568 | ALB.resultn        | =  | Missing     |                | Missing   | -0.001002175 | 2457              |
| age.yrs       | <  | 68.62970568 | ALB.resultn        | <  | 3.135       |                | Missing   | -0.000577808 | 2457              |
| age.yrs       | <  | 68.62970568 | ALB.resultn        | >= | 3.135       | Sodium.resultn | = Missing | 0            | 2457              |
| age.yrs       | <  | 68.62970568 | ALB.resultn        | >= | 3.135       | Sodium.resultn | <         | 136.5        | 0.002534775 2457  |
| age.yrs       | <  | 68.62970568 | ALB.resultn        | >= | 3.135       | Sodium.resultn | >=        | 136.5        | -6.48E-05 2457    |
| age.yrs       | >= | 68.62970568 |                    |    |             |                | Missing   | 0.002325568  | 2457              |
| PLT.resultn   | =  | Missing     |                    |    |             |                |           | -0.000172376 | 2458              |
| PLT.resultn   | <  | 198.5       | TBILL.resultn      | =  | Missing     |                |           | 0.00065142   | 2458              |
| PLT.resultn   | <  | 198.5       | TBILL.resultn      | <  | 1.65        |                |           | 1.21E-06     | 2458              |
| PLT.resultn   | <  | 198.5       | TBILL.resultn      | >= | 1.65        |                |           | 0.002016862  | 2458              |
| PLT.resultn   | >= | 198.5       | TBILL.resultn      | =  | Missing     |                |           | -0.00018039  | 2458              |
| PLT.resultn   | >= | 198.5       | TBILL.resultn      | <  | 3.5         |                |           | -0.000190698 | 2458              |
| PLT.resultn   | >= | 198.5       | TBILL.resultn      | >= | 3.5         |                |           | 0            | 2458              |
| psc.yrs.dur   | =  | Missing     |                    |    |             |                | Missing   | -0.000424509 | 2459              |
| psc.yrs.dur   | <  | 1.385352498 |                    |    |             |                | Missing   | -0.000737486 | 2459              |
| psc.yrs.dur   | >= | 1.385352498 | ALK.times.uln      | =  | Missing     |                | Missing   | 0.000600661  | 2459              |
| psc.yrs.dur   | >= | 1.385352498 | ALK.times.uln      | <  | 2.781735492 |                | Missing   | -0.000679016 | 2459              |
| psc.yrs.dur   | >= | 1.385352498 | ALK.times.uln      | >= | 2.781735492 | PLT.resultn    | = Missing | 0.00092111   | 2459              |
| psc.yrs.dur   | >= | 1.385352498 | ALK.times.uln      | >= | 2.781735492 | PLT.resultn    | <         | 251.5        | 0.00170051 2459   |
| psc.yrs.dur   | >= | 1.385352498 | ALK.times.uln      | >= | 2.781735492 | PLT.resultn    | >=        | 251.5        | 0 2459            |
| age.yrs       | =  | Missing     |                    |    |             |                | Missing   | -0.003314258 | 2460              |
| age.yrs       | <  | 53.55509925 |                    |    |             |                | Missing   | -0.003506755 | 2460              |
| age.yrs       | >= | 53.55509925 | AST.resultn        | =  | Missing     |                | Missing   | -0.002787722 | 2460              |
| age.yrs       | >= | 53.55509925 | AST.resultn        | <  | 51.5        |                | Missing   | -0.003923282 | 2460              |
| age.yrs       | >= | 53.55509925 | AST.resultn        | >= | 51.5        | psc.yrs.dur    | = Missing | -0.001387198 | 2460              |
| age.yrs       | >= | 53.55509925 | AST.resultn        | >= | 51.5        | psc.yrs.dur    | <         | 0.73100616   | -0.002774395 2460 |
| age.yrs       | >= | 53.55509925 | AST.resultn        | >= | 51.5        | psc.yrs.dur    | >=        | 0.73100616   | 0 2460            |
| PLT.resultn   | =  | Missing     |                    |    |             |                | Missing   | 0.000355832  | 2461              |
| PLT.resultn   | <  | 185.5       |                    |    |             |                | Missing   | 0.001459717  | 2461              |
| PLT.resultn   | >= | 185.5       | TBILL.resultn      | =  | Missing     |                | Missing   | 9.32E-05     | 2461              |
| PLT.resultn   | >= | 185.5       | TBILL.resultn      | <  | 1.95        | ALK.times.uln  | = Missing | 0            | 2461              |
| PLT.resultn   | >= | 185.5       | TBILL.resultn      | <  | 1.95        | ALK.times.uln  | <         | 5.92438247   | 4.15E-05 2461     |
| PLT.resultn   | >= | 185.5       | TBILL.resultn      | <  | 1.95        | ALK.times.uln  | >=        | 5.92438247   | 0.001083659 2461  |
| PLT.resultn   | >= | 185.5       | TBILL.resultn      | >= | 1.95        |                | Missing   | -7.25E-05    | 2461              |
| TBILL.resultn | =  | Missing     |                    |    |             |                | Missing   | 0.001111606  | 2462              |
| TBILL.resultn | <  | 3.05        | psc.yrs.dur        | =  | Missing     |                | Missing   | -0.000177081 | 2462              |
| TBILL.resultn | <  | 3.05        | psc.yrs.dur        | <  | 2.05065024  |                | Missing   | -0.00068447  | 2462              |
| TBILL.resultn | <  | 3.05        | psc.yrs.dur        | >= | 2.05065024  | psc.yrs.dur    | = Missing | 0.000922261  | 2462              |
| TBILL.resultn | <  | 3.05        | psc.yrs.dur        | >= | 2.05065024  | psc.yrs.dur    | <         | 2.902121834  | 0.006640278 2462  |
| TBILL.resultn | <  | 3.05        | psc.yrs.dur        | >= | 2.05065024  | psc.yrs.dur    | >=        | 2.902121834  | 0 2462            |
| TBILL.resultn | >= | 3.05        |                    |    |             |                | Missing   | -0.00071513  | 2462              |
| ALK.times.uln | =  | Missing     | TBILL.resultn      | =  | Missing     |                |           | -0.001004519 | 2463              |

|                |    |             |                    |    |             |               |         |              |              |      |
|----------------|----|-------------|--------------------|----|-------------|---------------|---------|--------------|--------------|------|
| ALK.times.uln  | =  | Missing     | TBILI.resultn      | <  | 0.95        |               |         | -0.001466055 | 2463         |      |
| ALK.times.uln  | =  | Missing     | TBILI.resultn      | >= | 0.95        |               |         | 0            | 2463         |      |
| ALK.times.uln  | <  | 6.02173913  |                    |    |             |               |         | -0.000728966 | 2463         |      |
| ALK.times.uln  | >= | 6.02173913  | AST.resultn        | =  | Missing     |               |         | 0.000267731  | 2463         |      |
| ALK.times.uln  | >= | 6.02173913  | AST.resultn        | <  | 119         |               |         | 0.00119536   | 2463         |      |
| ALK.times.uln  | >= | 6.02173913  | AST.resultn        | >= | 119         |               |         | -0.000659899 | 2463         |      |
| age.yrs        | =  | Missing     |                    |    |             | Missing       |         | -0.000702895 | 2464         |      |
| age.yrs        | <  | 69.97672827 | AST.resultn        | =  | Missing     | Missing       |         | -0.001473998 | 2464         |      |
| age.yrs        | <  | 69.97672827 | AST.resultn        | <  | 149         | TBILI.resultn | =       | Missing      | -0.000714118 | 2464 |
| age.yrs        | <  | 69.97672827 | AST.resultn        | <  | 149         | TBILI.resultn | <       | 0.85         | -0.00121342  | 2464 |
| age.yrs        | <  | 69.97672827 | AST.resultn        | <  | 149         | TBILI.resultn | >=      | 0.85         | 0            | 2464 |
| age.yrs        | <  | 69.97672827 | AST.resultn        | >= | 149         |               | Missing | -0.001434564 | 2464         |      |
| age.yrs        | >= | 69.97672827 |                    |    |             | Missing       |         | 0.001779592  | 2464         |      |
| psc.yrs.dur    | =  | Missing     |                    |    |             |               |         | -0.000532537 | 2465         |      |
| psc.yrs.dur    | <  | 0.839151266 | ALB.resultn        | =  | Missing     |               |         | -0.001427997 | 2465         |      |
| psc.yrs.dur    | <  | 0.839151266 | ALB.resultn        | <  | 3.185       |               |         | -0.001198662 | 2465         |      |
| psc.yrs.dur    | <  | 0.839151266 | ALB.resultn        | >= | 3.185       |               |         | -0.000870622 | 2465         |      |
| psc.yrs.dur    | >= | 0.839151266 | ALB.resultn        | =  | Missing     |               |         | 5.99E-05     | 2465         |      |
| psc.yrs.dur    | >= | 0.839151266 | ALB.resultn        | <  | 3.25        |               |         | 0.000568933  | 2465         |      |
| psc.yrs.dur    | >= | 0.839151266 | ALB.resultn        | >= | 3.25        |               |         | 0            | 2465         |      |
| psc.yrs.dur    | =  | Missing     |                    |    |             | Missing       |         | -2.49E-05    | 2466         |      |
| psc.yrs.dur    | <  | 10.16563997 | psc.yrs.dur        | =  | Missing     | Missing       |         | 3.07E-05     | 2466         |      |
| psc.yrs.dur    | <  | 10.16563997 | psc.yrs.dur        | <  | 6.410677618 | ALK.times.uln | =       | Missing      | 0            | 2466 |
| psc.yrs.dur    | <  | 10.16563997 | psc.yrs.dur        | <  | 6.410677618 | ALK.times.uln | <       | 7.868810472  | -0.000104497 | 2466 |
| psc.yrs.dur    | <  | 10.16563997 | psc.yrs.dur        | <  | 6.410677618 | ALK.times.uln | >=      | 7.868810472  | -0.000782397 | 2466 |
| psc.yrs.dur    | <  | 10.16563997 | psc.yrs.dur        | >= | 6.410677618 |               | Missing | 0.001792695  | 2466         |      |
| psc.yrs.dur    | >= | 10.16563997 |                    |    |             | Missing       |         | -0.000852038 | 2466         |      |
| psc.yrs.dur    | =  | Missing     |                    |    |             |               |         | -0.0013716   | 2467         |      |
| psc.yrs.dur    | <  | 1.961670089 | TBILI.resultn      | =  | Missing     |               |         | 0            | 2467         |      |
| psc.yrs.dur    | <  | 1.961670089 | TBILI.resultn      | <  | 2.2         |               |         | -0.00182559  | 2467         |      |
| psc.yrs.dur    | <  | 1.961670089 | TBILI.resultn      | >= | 2.2         |               |         | -0.001787514 | 2467         |      |
| psc.yrs.dur    | >= | 1.961670089 | AST.resultn        | =  | Missing     |               |         | -0.000739336 | 2467         |      |
| psc.yrs.dur    | >= | 1.961670089 | AST.resultn        | <  | 89.5        |               |         | -0.001106253 | 2467         |      |
| psc.yrs.dur    | >= | 1.961670089 | AST.resultn        | >= | 89.5        |               |         | 0.000515906  | 2467         |      |
| Sodium.resultn | =  | Missing     |                    |    |             |               |         | 0.000475113  | 2468         |      |
| Sodium.resultn | <  | 141.5       | psc.yrs.dur        | =  | Missing     |               |         | 0.000959825  | 2468         |      |
| Sodium.resultn | <  | 141.5       | psc.yrs.dur        | <  | 8.026009582 |               |         | 0.000598367  | 2468         |      |
| Sodium.resultn | <  | 141.5       | psc.yrs.dur        | >= | 8.026009582 |               |         | 0.003610521  | 2468         |      |
| Sodium.resultn | >= | 141.5       | TBILI.resultn      | =  | Missing     |               |         | -0.000302685 | 2468         |      |
| Sodium.resultn | >= | 141.5       | TBILI.resultn      | <  | 1.35        |               |         | -0.000419103 | 2468         |      |
| Sodium.resultn | >= | 141.5       | TBILI.resultn      | >= | 1.35        |               |         | 0            | 2468         |      |
| age.yrs        | =  | Missing     |                    |    |             | Missing       |         | -0.000664231 | 2469         |      |
| age.yrs        | <  | 69.84257358 | Sodium.resultn     | =  | Missing     | Missing       |         | -0.00069938  | 2469         |      |
| age.yrs        | <  | 69.84257358 | Sodium.resultn     | <  | 138.5       | ALK.times.uln | =       | Missing      | 0            | 2469 |
| age.yrs        | <  | 69.84257358 | Sodium.resultn     | <  | 138.5       | ALK.times.uln | <       | 2.781735492  | -0.001421981 | 2469 |
| age.yrs        | <  | 69.84257358 | Sodium.resultn     | <  | 138.5       | ALK.times.uln | >=      | 2.781735492  | 0.000941136  | 2469 |
| age.yrs        | <  | 69.84257358 | Sodium.resultn     | >= | 138.5       |               | Missing | -0.001098298 | 2469         |      |
| age.yrs        | >= | 69.84257358 |                    |    |             | Missing       |         | 0.002917941  | 2469         |      |
| psc.yrs.dur    | =  | Missing     |                    |    |             |               |         | 0.000285119  | 2470         |      |
| psc.yrs.dur    | <  | 7.404517454 | psc.yrs.dur        | =  | Missing     |               |         | 0.000220239  | 2470         |      |
| psc.yrs.dur    | <  | 7.404517454 | psc.yrs.dur        | <  | 0.001368925 |               |         | 0.002561726  | 2470         |      |
| psc.yrs.dur    | <  | 7.404517454 | psc.yrs.dur        | >= | 0.001368925 |               |         | 0            | 2470         |      |
| psc.yrs.dur    | >= | 7.404517454 | TBILI.resultn      | =  | Missing     |               |         | 0.000719621  | 2470         |      |
| psc.yrs.dur    | >= | 7.404517454 | TBILI.resultn      | <  | 0.95        |               |         | -0.000542099 | 2470         |      |
| psc.yrs.dur    | >= | 7.404517454 | TBILI.resultn      | >= | 0.95        |               |         | 0.002369562  | 2470         |      |
| age.yrs        | =  | Missing     |                    |    |             | Missing       |         | 0.000162811  | 2471         |      |
| age.yrs        | <  | 69.84257358 | Hemoglobin.resultn | =  | Missing     | Missing       |         | 0.000861202  | 2471         |      |
| age.yrs        | <  | 69.84257358 | Hemoglobin.resultn | <  | 14.05       | TBILI.resultn | =       | Missing      | 8.05E-05     | 2471 |
| age.yrs        | <  | 69.84257358 | Hemoglobin.resultn | <  | 14.05       | TBILI.resultn | <       | 1.65         | 9.52E-05     | 2471 |
| age.yrs        | <  | 69.84257358 | Hemoglobin.resultn | <  | 14.05       | TBILI.resultn | >=      | 1.65         | 0            | 2471 |
| age.yrs        | <  | 69.84257358 | Hemoglobin.resultn | >= | 14.05       |               | Missing | -0.000721157 | 2471         |      |
| age.yrs        | >= | 69.84257358 |                    |    |             | Missing       |         | 0.00408125   | 2471         |      |



|                |    |                           |    |                            |               |             |              |              |      |
|----------------|----|---------------------------|----|----------------------------|---------------|-------------|--------------|--------------|------|
| AST.resultn    | =  | Missing                   |    |                            | Missing       |             | -0.000476733 | 2472         |      |
| AST.resultn    | <  | 213.5 age.yrs             | =  | Missing                    | Missing       |             | 0.000370339  | 2472         |      |
| AST.resultn    | <  | 213.5 age.yrs             | <  | 53.64681725                | Missing       |             | 3.49E-05     | 2472         |      |
| AST.resultn    | <  | 213.5 age.yrs             | >= | 53.64681725 Sodium.resultn | =             | Missing     | 0            | 2472         |      |
| AST.resultn    | <  | 213.5 age.yrs             | >= | 53.64681725 Sodium.resultn | <             | 137.5       | 0.002762259  | 2472         |      |
| AST.resultn    | <  | 213.5 age.yrs             | >= | 53.64681725 Sodium.resultn | >=            | 137.5       | 0.001389082  | 2472         |      |
| AST.resultn    | >= | 213.5                     |    |                            | Missing       |             | 0.002210642  | 2472         |      |
| PLT.resultn    | =  | Missing                   |    |                            | Missing       |             | -0.002172911 | 2473         |      |
| PLT.resultn    | <  | 185.5                     |    |                            | Missing       |             | -0.00026836  | 2473         |      |
| PLT.resultn    | >= | 185.5 Hemoglobin.resultn  | =  | Missing                    | TBILI.resultn | =           | Missing      | -0.002328107 | 2473 |
| PLT.resultn    | >= | 185.5 Hemoglobin.resultn  | =  | Missing                    | TBILI.resultn | <           | 0.75         | -0.003553426 | 2473 |
| PLT.resultn    | >= | 185.5 Hemoglobin.resultn  | =  | Missing                    | TBILI.resultn | >=          | 0.75         | 0            | 2473 |
| PLT.resultn    | >= | 185.5 Hemoglobin.resultn  | <  | 12.35                      | Missing       |             | -0.003290482 | 2473         |      |
| PLT.resultn    | >= | 185.5 Hemoglobin.resultn  | >= | 12.35                      | Missing       |             | -0.00277516  | 2473         |      |
| TBILI.resultn  | =  | Missing                   |    |                            | Missing       |             | -0.000403357 | 2474         |      |
| TBILI.resultn  | <  | 4.25 PLT.resultn          | =  | Missing                    | Missing       |             | -4.91E-05    | 2474         |      |
| TBILI.resultn  | <  | 4.25 PLT.resultn          | <  | 209.5 ALB.resultn          | =             | Missing     | 0.000236254  | 2474         |      |
| TBILI.resultn  | <  | 4.25 PLT.resultn          | <  | 209.5 ALB.resultn          | <             | 3.92        | 0.000708763  | 2474         |      |
| TBILI.resultn  | <  | 4.25 PLT.resultn          | <  | 209.5 ALB.resultn          | >=            | 3.92        | 0            | 2474         |      |
| TBILI.resultn  | <  | 4.25 PLT.resultn          | >= | 209.5                      | Missing       |             | -0.000593501 | 2474         |      |
| TBILI.resultn  | >= | 4.25                      |    |                            | Missing       |             | -0.000809518 | 2474         |      |
| age.yrs        | =  | Missing                   |    |                            | Missing       |             | -0.002609097 | 2475         |      |
| age.yrs        | <  | 53.64681725               |    |                            | Missing       |             | -0.002752792 | 2475         |      |
| age.yrs        | >= | 53.64681725 TBILI.resultn | =  | Missing                    | Missing       |             | -0.002216049 | 2475         |      |
| age.yrs        | >= | 53.64681725 TBILI.resultn | <  | 0.75                       | Missing       |             | -0.003534637 | 2475         |      |
| age.yrs        | >= | 53.64681725 TBILI.resultn | >= | 0.75 ALK.times.uln         | =             | Missing     | -0.001048158 | 2475         |      |
| age.yrs        | >= | 53.64681725 TBILI.resultn | >= | 0.75 ALK.times.uln         | <             | 3.669437875 | -0.001703257 | 2475         |      |
| age.yrs        | >= | 53.64681725 TBILI.resultn | >= | 0.75 ALK.times.uln         | >=            | 3.669437875 | 0            | 2475         |      |
| Sodium.resultn | =  | Missing                   |    |                            |               |             | -8.18E-05    | 2476         |      |
| Sodium.resultn | <  | 138.5 ALK.times.uln       | =  | Missing                    |               |             | 0.000490129  | 2476         |      |
| Sodium.resultn | <  | 138.5 ALK.times.uln       | <  | 2.795652174                |               |             | 0.000166733  | 2476         |      |
| Sodium.resultn | <  | 138.5 ALK.times.uln       | >= | 2.795652174                |               |             | 0.001885868  | 2476         |      |
| Sodium.resultn | >= | 138.5 TBILI.resultn       | =  | Missing                    |               |             | 0.000249988  | 2476         |      |
| Sodium.resultn | >= | 138.5 TBILI.resultn       | <  | 1.75                       |               |             | 0.000276868  | 2476         |      |
| Sodium.resultn | >= | 138.5 TBILI.resultn       | >= | 1.75                       |               |             | 0            | 2476         |      |
| PLT.resultn    | =  | Missing                   |    |                            | Missing       |             | -0.000654601 | 2477         |      |
| PLT.resultn    | <  | 170                       |    |                            | Missing       |             | 0.001458181  | 2477         |      |
| PLT.resultn    | >= | 170 Hemoglobin.resultn    | =  | Missing                    | TBILI.resultn | =           | Missing      | -0.000865105 | 2477 |
| PLT.resultn    | >= | 170 Hemoglobin.resultn    | =  | Missing                    | TBILI.resultn | <           | 1.15         | -0.00123111  | 2477 |
| PLT.resultn    | >= | 170 Hemoglobin.resultn    | =  | Missing                    | TBILI.resultn | >=          | 1.15         | 0            | 2477 |
| PLT.resultn    | >= | 170 Hemoglobin.resultn    | <  | 12.85                      | Missing       |             | -0.001461388 | 2477         |      |
| PLT.resultn    | >= | 170 Hemoglobin.resultn    | >= | 12.85                      | Missing       |             | -0.001268444 | 2477         |      |
| ALK.times.uln  | =  | Missing                   |    |                            |               |             | 0.000480216  | 2478         |      |
| ALK.times.uln  | <  | 2.815208295 TBILI.resultn | =  | Missing                    |               |             | 0.000763903  | 2478         |      |
| ALK.times.uln  | <  | 2.815208295 TBILI.resultn | <  | 1.35                       |               |             | 0.000870001  | 2478         |      |
| ALK.times.uln  | <  | 2.815208295 TBILI.resultn | >= | 1.35                       |               |             | 0            | 2478         |      |
| ALK.times.uln  | >= | 2.815208295 ALB.resultn   | =  | Missing                    |               |             | 0.001627209  | 2478         |      |
| ALK.times.uln  | >= | 2.815208295 ALB.resultn   | <  | 4.05                       |               |             | 0.000973805  | 2478         |      |
| ALK.times.uln  | >= | 2.815208295 ALB.resultn   | >= | 4.05                       |               |             | 0.003097368  | 2478         |      |
| psc.yrs.dur    | =  | Missing                   |    |                            |               |             | 0.000800176  | 2479         |      |
| psc.yrs.dur    | <  | 6.262833676 AST.resultn   | =  | Missing                    |               |             | 0.00080401   | 2479         |      |
| psc.yrs.dur    | <  | 6.262833676 AST.resultn   | <  | 72.5                       |               |             | 0.00130347   | 2479         |      |
| psc.yrs.dur    | <  | 6.262833676 AST.resultn   | >= | 72.5                       |               |             | 0            | 2479         |      |
| psc.yrs.dur    | >= | 6.262833676 AST.resultn   | =  | Missing                    |               |             | 0.000772596  | 2479         |      |
| psc.yrs.dur    | >= | 6.262833676 AST.resultn   | <  | 43                         |               |             | -0.000226676 | 2479         |      |
| psc.yrs.dur    | >= | 6.262833676 AST.resultn   | >= | 43                         |               |             | 0.00200247   | 2479         |      |
| TBILI.resultn  | =  | Missing                   |    |                            | Missing       |             | -0.003143763 | 2480         |      |
| TBILI.resultn  | <  | 0.95                      |    |                            | Missing       |             | -0.002952491 | 2480         |      |
| TBILI.resultn  | >= | 0.95 Hemoglobin.resultn   | =  | Missing                    | Missing       |             | -0.001370722 | 2480         |      |
| TBILI.resultn  | >= | 0.95 Hemoglobin.resultn   | <  | 12.65                      | Missing       |             | -0.002491814 | 2480         |      |
| TBILI.resultn  | >= | 0.95 Hemoglobin.resultn   | >= | 12.65 ALK.times.uln        | =             | Missing     | -0.001797276 | 2480         |      |
| TBILI.resultn  | >= | 0.95 Hemoglobin.resultn   | >= | 12.65 ALK.times.uln        | <             | 2.781735492 | -0.003125698 | 2480         |      |

|               |    |             |                    |    |             |                    |    |             |              |      |
|---------------|----|-------------|--------------------|----|-------------|--------------------|----|-------------|--------------|------|
| TBILI.resultn | >= | 0.95        | Hemoglobin.resultn | >= | 12.65       | ALK.times.uln      | >= | 2.781735492 | 0            | 2480 |
| ALK.times.uln | =  | Missing     | TBILI.resultn      | =  | Missing     |                    |    | Missing     | -3.31E-07    | 2481 |
| ALK.times.uln | =  | Missing     | TBILI.resultn      | <  | 1.45        | PLT.resultn        | =  | Missing     | 0            | 2481 |
| ALK.times.uln | =  | Missing     | TBILI.resultn      | <  | 1.45        | PLT.resultn        | <  | 238.5       | 0.000382728  | 2481 |
| ALK.times.uln | =  | Missing     | TBILI.resultn      | <  | 1.45        | PLT.resultn        | >= | 238.5       | 0.003106036  | 2481 |
| ALK.times.uln | =  | Missing     | TBILI.resultn      | >= | 1.45        |                    |    | Missing     | 0.003082437  | 2481 |
| ALK.times.uln | <  | 5.462893197 |                    |    |             |                    |    | Missing     | 0.000540684  | 2481 |
| ALK.times.uln | >= | 5.462893197 |                    |    |             |                    |    | Missing     | 0.001865797  | 2481 |
| age.yrs       | =  | Missing     |                    |    |             |                    |    | Missing     | 0.000641518  | 2482 |
| age.yrs       | <  | 69.76043806 | ALB.resultn        | =  | Missing     |                    |    | Missing     | -0.000298721 | 2482 |
| age.yrs       | <  | 69.76043806 | ALB.resultn        | <  | 2.915       |                    |    | Missing     | 0.001451886  | 2482 |
| age.yrs       | <  | 69.76043806 | ALB.resultn        | >= | 2.915       | TBILI.resultn      | =  | Missing     | 0.000591345  | 2482 |
| age.yrs       | <  | 69.76043806 | ALB.resultn        | >= | 2.915       | TBILI.resultn      | <  | 3.75        | 0.000625048  | 2482 |
| age.yrs       | <  | 69.76043806 | ALB.resultn        | >= | 2.915       | TBILI.resultn      | >= | 3.75        | 0            | 2482 |
| age.yrs       | >= | 69.76043806 |                    |    |             |                    |    | Missing     | 0.00307406   | 2482 |
| AST.resultn   | =  | Missing     |                    |    |             |                    |    | Missing     | -0.002571075 | 2483 |
| AST.resultn   | <  | 150         | ALK.times.uln      | =  | Missing     | TBILI.resultn      | =  | Missing     | -0.001606941 | 2483 |
| AST.resultn   | <  | 150         | ALK.times.uln      | =  | Missing     | TBILI.resultn      | <  | 1.31        | -0.00205539  | 2483 |
| AST.resultn   | <  | 150         | ALK.times.uln      | =  | Missing     | TBILI.resultn      | >= | 1.31        | 0            | 2483 |
| AST.resultn   | <  | 150         | ALK.times.uln      | <  | 5.446215139 |                    |    | Missing     | -0.001666554 | 2483 |
| AST.resultn   | <  | 150         | ALK.times.uln      | >= | 5.446215139 |                    |    | Missing     | -0.000345261 | 2483 |
| AST.resultn   | >= | 150         |                    |    |             |                    |    | Missing     | -0.002063971 | 2483 |
| PLT.resultn   | =  | Missing     |                    |    |             |                    |    | Missing     | 0.000102112  | 2484 |
| PLT.resultn   | <  | 249.5       | ALB.resultn        | =  | Missing     |                    |    | Missing     | -0.000483354 | 2484 |
| PLT.resultn   | <  | 249.5       | ALB.resultn        | <  | 3.915       | Hemoglobin.resultn | =  | Missing     | 0.000914725  | 2484 |
| PLT.resultn   | <  | 249.5       | ALB.resultn        | <  | 3.915       | Hemoglobin.resultn | <  | 13.45       | 0.002162078  | 2484 |
| PLT.resultn   | <  | 249.5       | ALB.resultn        | <  | 3.915       | Hemoglobin.resultn | >= | 13.45       | 0            | 2484 |
| PLT.resultn   | <  | 249.5       | ALB.resultn        | >= | 3.915       |                    |    | Missing     | -0.001241634 | 2484 |
| PLT.resultn   | >= | 249.5       |                    |    |             |                    |    | Missing     | -0.00088028  | 2484 |
| AST.resultn   | =  | Missing     |                    |    |             |                    |    | Missing     | -0.000284176 | 2485 |
| AST.resultn   | <  | 207.5       | Sodium.resultn     | =  | Missing     |                    |    | Missing     | 0.000305615  | 2485 |
| AST.resultn   | <  | 207.5       | Sodium.resultn     | <  | 136.5       |                    |    | Missing     | 0.001813475  | 2485 |
| AST.resultn   | <  | 207.5       | Sodium.resultn     | >= | 136.5       | TBILI.resultn      | =  | Missing     | 0.000678867  | 2485 |
| AST.resultn   | <  | 207.5       | Sodium.resultn     | >= | 136.5       | TBILI.resultn      | <  | 2.1         | 0.000762334  | 2485 |
| AST.resultn   | <  | 207.5       | Sodium.resultn     | >= | 136.5       | TBILI.resultn      | >= | 2.1         | 0            | 2485 |
| AST.resultn   | >= | 207.5       |                    |    |             |                    |    | Missing     | 0.002193941  | 2485 |
| TBILI.resultn | =  | Missing     |                    |    |             |                    |    | Missing     | -0.001913034 | 2486 |
| TBILI.resultn | <  | 4.25        | TBILI.resultn      | =  | Missing     |                    |    | Missing     | -0.002540502 | 2486 |
| TBILI.resultn | <  | 4.25        | TBILI.resultn      | <  | 1.31        |                    |    | Missing     | -0.00277083  | 2486 |
| TBILI.resultn | <  | 4.25        | TBILI.resultn      | >= | 1.31        | Hemoglobin.resultn | =  | Missing     | 0            | 2486 |
| TBILI.resultn | <  | 4.25        | TBILI.resultn      | >= | 1.31        | Hemoglobin.resultn | <  | 13.75       | 6.20E-05     | 2486 |
| TBILI.resultn | <  | 4.25        | TBILI.resultn      | >= | 1.31        | Hemoglobin.resultn | >= | 13.75       | -0.003312367 | 2486 |
| TBILI.resultn | >= | 4.25        |                    |    |             |                    |    | Missing     | -0.002605139 | 2486 |
| PLT.resultn   | =  | Missing     | psc.yrs.dur        | =  | Missing     |                    |    |             | -0.001859002 | 2487 |
| PLT.resultn   | =  | Missing     | psc.yrs.dur        | <  | 0.281998631 |                    |    |             | -0.003718004 | 2487 |
| PLT.resultn   | =  | Missing     | psc.yrs.dur        | >= | 0.281998631 |                    |    |             | 0            | 2487 |
| PLT.resultn   | <  | 166.5       |                    |    |             |                    |    |             | -0.001195069 | 2487 |
| PLT.resultn   | >= | 166.5       | ALB.resultn        | =  | Missing     |                    |    |             | -0.000668282 | 2487 |
| PLT.resultn   | >= | 166.5       | ALB.resultn        | <  | 3.13        |                    |    |             | -0.003251242 | 2487 |
| PLT.resultn   | >= | 166.5       | ALB.resultn        | >= | 3.13        |                    |    |             | -0.002823429 | 2487 |
| age.yrs       | =  | Missing     |                    |    |             |                    |    | Missing     | 0.000529185  | 2488 |
| age.yrs       | <  | 69.71800137 | ALB.resultn        | =  | Missing     |                    |    | Missing     | -0.000463092 | 2488 |
| age.yrs       | <  | 69.71800137 | ALB.resultn        | <  | 2.95        |                    |    | Missing     | 0.001195856  | 2488 |
| age.yrs       | <  | 69.71800137 | ALB.resultn        | >= | 2.95        | TBILI.resultn      | =  | Missing     | 0.000456303  | 2488 |
| age.yrs       | <  | 69.71800137 | ALB.resultn        | >= | 2.95        | TBILI.resultn      | <  | 2.85        | 0.000484383  | 2488 |
| age.yrs       | <  | 69.71800137 | ALB.resultn        | >= | 2.95        | TBILI.resultn      | >= | 2.85        | 0            | 2488 |
| age.yrs       | >= | 69.71800137 |                    |    |             |                    |    | Missing     | 0.003006609  | 2488 |
| PLT.resultn   | =  | Missing     |                    |    |             |                    |    | Missing     | -5.80E-05    | 2489 |
| PLT.resultn   | <  | 185.5       |                    |    |             |                    |    | Missing     | 0.00215686   | 2489 |
| PLT.resultn   | >= | 185.5       | TBILI.resultn      | =  | Missing     |                    |    | Missing     | -0.000204074 | 2489 |
| PLT.resultn   | >= | 185.5       | TBILI.resultn      | <  | 3.15        | ALK.times.uln      | =  | Missing     | 0            | 2489 |
| PLT.resultn   | >= | 185.5       | TBILI.resultn      | <  | 3.15        | ALK.times.uln      | <  | 5.462893197 | -0.000379466 | 2489 |

|               |    |             |                    |    |             |                    |         |             |              |      |
|---------------|----|-------------|--------------------|----|-------------|--------------------|---------|-------------|--------------|------|
| PLT.resultn   | >= | 185.5       | TBILL.resultn      | <  | 3.15        | ALK.times.uln      | >=      | 5.462893197 | 0.001025852  | 2489 |
| PLT.resultn   | >= | 185.5       | TBILL.resultn      | >= | 3.15        |                    | Missing |             | -0.000417747 | 2489 |
| age.yrs       | =  | Missing     |                    |    |             |                    | Missing |             | -0.001294106 | 2490 |
| age.yrs       | <  | 54.36824093 |                    |    |             |                    | Missing |             | -0.001607865 | 2490 |
| age.yrs       | >= | 54.36824093 | AST.resultn        | =  | Missing     |                    | Missing |             | -0.000184741 | 2490 |
| age.yrs       | >= | 54.36824093 | AST.resultn        | <  | 51.5        |                    | Missing |             | -0.002256874 | 2490 |
| age.yrs       | >= | 54.36824093 | AST.resultn        | >= | 51.5        | TBILL.resultn      | =       | Missing     | 0.002491764  | 2490 |
| age.yrs       | >= | 54.36824093 | AST.resultn        | >= | 51.5        | TBILL.resultn      | <       | 0.85        | 0.00477588   | 2490 |
| age.yrs       | >= | 54.36824093 | AST.resultn        | >= | 51.5        | TBILL.resultn      | >=      | 0.85        | 0            | 2490 |
| ALK.times.uln | =  | Missing     | PLT.resultn        | =  | Missing     |                    |         |             | -0.000902016 | 2491 |
| ALK.times.uln | =  | Missing     | PLT.resultn        | <  | 198         |                    |         |             | -0.000423695 | 2491 |
| ALK.times.uln | =  | Missing     | PLT.resultn        | >= | 198         |                    |         |             | 0.000775914  | 2491 |
| ALK.times.uln | <  | 4.964143426 |                    |    |             |                    |         |             | -8.55E-05    | 2491 |
| ALK.times.uln | >= | 4.964143426 | Hemoglobin.resultn | =  | Missing     |                    |         |             | 0.00065149   | 2491 |
| ALK.times.uln | >= | 4.964143426 | Hemoglobin.resultn | <  | 13.25       |                    |         |             | 0.00130298   | 2491 |
| ALK.times.uln | >= | 4.964143426 | Hemoglobin.resultn | >= | 13.25       |                    |         |             | 0            | 2491 |
| ALB.resultn   | =  | Missing     |                    |    |             |                    | Missing |             | -0.001674028 | 2492 |
| ALB.resultn   | <  | 2.965       |                    |    |             |                    | Missing |             | 0.000793257  | 2492 |
| ALB.resultn   | >= | 2.965       | TBILL.resultn      | =  | Missing     |                    | Missing |             | -0.00107459  | 2492 |
| ALB.resultn   | >= | 2.965       | TBILL.resultn      | <  | 2.65        | age.yrs            | =       | Missing     | -0.001036433 | 2492 |
| ALB.resultn   | >= | 2.965       | TBILL.resultn      | <  | 2.65        | age.yrs            | <       | 53.46475017 | -0.001452467 | 2492 |
| ALB.resultn   | >= | 2.965       | TBILL.resultn      | <  | 2.65        | age.yrs            | >=      | 53.46475017 | 0            | 2492 |
| ALB.resultn   | >= | 2.965       | TBILL.resultn      | >= | 2.65        |                    | Missing |             | -0.001658672 | 2492 |
| ALB.resultn   | =  | Missing     |                    |    |             |                    | Missing |             | -0.000213543 | 2493 |
| ALB.resultn   | <  | 2.95        |                    |    |             |                    | Missing |             | 0.000790986  | 2493 |
| ALB.resultn   | >= | 2.95        | ALB.resultn        | =  | Missing     |                    | Missing |             | -0.000566163 | 2493 |
| ALB.resultn   | >= | 2.95        | ALB.resultn        | <  | 3.135       |                    | Missing |             | -0.000772846 | 2493 |
| ALB.resultn   | >= | 2.95        | ALB.resultn        | >= | 3.135       | ALK.times.uln      | =       | Missing     | 0            | 2493 |
| ALB.resultn   | >= | 2.95        | ALB.resultn        | >= | 3.135       | ALK.times.uln      | <       | 2.822501299 | -0.001146192 | 2493 |
| ALB.resultn   | >= | 2.95        | ALB.resultn        | >= | 3.135       | ALK.times.uln      | >=      | 2.822501299 | 0.000327067  | 2493 |
| TBILL.resultn | =  | Missing     |                    |    |             |                    | Missing |             | -0.002894722 | 2494 |
| TBILL.resultn | <  | 3.15        | TBILL.resultn      | =  | Missing     |                    | Missing |             | -0.002094229 | 2494 |
| TBILL.resultn | <  | 3.15        | TBILL.resultn      | <  | 0.95        |                    | Missing |             | -0.002493015 | 2494 |
| TBILL.resultn | <  | 3.15        | TBILL.resultn      | >= | 0.95        | Hemoglobin.resultn | =       | Missing     | 0            | 2494 |
| TBILL.resultn | <  | 3.15        | TBILL.resultn      | >= | 0.95        | Hemoglobin.resultn | <       | 13.35       | -0.000695885 | 2494 |
| TBILL.resultn | <  | 3.15        | TBILL.resultn      | >= | 0.95        | Hemoglobin.resultn | >=      | 13.35       | -0.002473144 | 2494 |
| TBILL.resultn | >= | 3.15        |                    |    |             |                    | Missing |             | -0.002318417 | 2494 |
| TBILL.resultn | =  | Missing     |                    |    |             |                    |         |             | 0.000415008  | 2495 |
| TBILL.resultn | <  | 1.65        | ALK.times.uln      | =  | Missing     |                    |         |             | 0            | 2495 |
| TBILL.resultn | <  | 1.65        | ALK.times.uln      | <  | 5.39731876  |                    |         |             | -0.001001852 | 2495 |
| TBILL.resultn | <  | 1.65        | ALK.times.uln      | >= | 5.39731876  |                    |         |             | 0.000711473  | 2495 |
| TBILL.resultn | >= | 1.65        | Hemoglobin.resultn | =  | Missing     |                    |         |             | 0.001543594  | 2495 |
| TBILL.resultn | >= | 1.65        | Hemoglobin.resultn | <  | 12.25       |                    |         |             | -0.00019736  | 2495 |
| TBILL.resultn | >= | 1.65        | Hemoglobin.resultn | >= | 12.25       |                    |         |             | 0.000485505  | 2495 |
| PLT.resultn   | =  | Missing     |                    |    |             |                    |         |             | 0.000709274  | 2496 |
| PLT.resultn   | <  | 198.5       | TBILL.resultn      | =  | Missing     |                    |         |             | 0.001280974  | 2496 |
| PLT.resultn   | <  | 198.5       | TBILL.resultn      | <  | 0.85        |                    |         |             | 2.25E-05     | 2496 |
| PLT.resultn   | <  | 198.5       | TBILL.resultn      | >= | 0.85        |                    |         |             | 0.00246078   | 2496 |
| PLT.resultn   | >= | 198.5       | ALK.times.uln      | =  | Missing     |                    |         |             | 0            | 2496 |
| PLT.resultn   | >= | 198.5       | ALK.times.uln      | <  | 5.446215139 |                    |         |             | -1.16E-05    | 2496 |
| PLT.resultn   | >= | 198.5       | ALK.times.uln      | >= | 5.446215139 |                    |         |             | 0.00165415   | 2496 |
| ALB.resultn   | =  | Missing     |                    |    |             |                    | Missing |             | -0.002048249 | 2497 |
| ALB.resultn   | <  | 3.135       |                    |    |             |                    | Missing |             | -0.00196859  | 2497 |
| ALB.resultn   | >= | 3.135       | TBILL.resultn      | =  | Missing     |                    | Missing |             | -0.001838642 | 2497 |
| ALB.resultn   | >= | 3.135       | TBILL.resultn      | <  | 0.75        |                    | Missing |             | -0.002615209 | 2497 |
| ALB.resultn   | >= | 3.135       | TBILL.resultn      | >= | 0.75        | Hemoglobin.resultn | =       | Missing     | 0            | 2497 |
| ALB.resultn   | >= | 3.135       | TBILL.resultn      | >= | 0.75        | Hemoglobin.resultn | <       | 13.75       | -0.000617791 | 2497 |
| ALB.resultn   | >= | 3.135       | TBILL.resultn      | >= | 0.75        | Hemoglobin.resultn | >=      | 13.75       | -0.001804548 | 2497 |
| psc.yrs.dur   | =  | Missing     |                    |    |             |                    |         |             | 0.000517873  | 2498 |
| psc.yrs.dur   | <  | 6.258726899 | ALK.times.uln      | =  | Missing     |                    |         |             | 0            | 2498 |
| psc.yrs.dur   | <  | 6.258726899 | ALK.times.uln      | <  | 7.801810865 |                    |         |             | 0.000563763  | 2498 |
| psc.yrs.dur   | <  | 6.258726899 | ALK.times.uln      | >= | 7.801810865 |                    |         |             | -0.000469651 | 2498 |

|               |    |             |                |    |             |                |         |              |              |
|---------------|----|-------------|----------------|----|-------------|----------------|---------|--------------|--------------|
| psc.yrs.dur   | >= | 6.258726899 | ALK.times.uln  | =  | Missing     |                |         | 0.001411316  | 2498         |
| psc.yrs.dur   | >= | 6.258726899 | ALK.times.uln  | <  | 2.815208295 |                |         | -0.000446352 | 2498         |
| psc.yrs.dur   | >= | 6.258726899 | ALK.times.uln  | >= | 2.815208295 |                |         | 0.003146935  | 2498         |
| ALK.times.uln | =  | Missing     | PLT.resultn    | =  | Missing     |                |         | 0            | 2499         |
| ALK.times.uln | =  | Missing     | PLT.resultn    | <  | 228.5       |                |         | 0.000573943  | 2499         |
| ALK.times.uln | =  | Missing     | PLT.resultn    | >= | 228.5       |                |         | 0.002740033  | 2499         |
| ALK.times.uln | <  | 6.115825908 | Sodium.resultn | =  | Missing     |                |         | -1.98E-05    | 2499         |
| ALK.times.uln | <  | 6.115825908 | Sodium.resultn | <  | 137.5       |                |         | 0.003567572  | 2499         |
| ALK.times.uln | <  | 6.115825908 | Sodium.resultn | >= | 137.5       |                |         | 0.000305498  | 2499         |
| ALK.times.uln | >= | 6.115825908 |                |    |             |                |         | 0.00186482   | 2499         |
| ALB.resultn   | =  | Missing     |                |    |             |                | Missing | 0.000350232  | 2500         |
| ALB.resultn   | <  | 3.03        |                |    |             |                | Missing | 0.000945259  | 2500         |
| ALB.resultn   | >= | 3.03        | ALK.times.uln  | =  | Missing     |                | Missing | -3.49E-06    | 2500         |
| ALB.resultn   | >= | 3.03        | ALK.times.uln  | <  | 6.338830603 | Sodium.resultn | =       | Missing      | 0            |
| ALB.resultn   | >= | 3.03        | ALK.times.uln  | <  | 6.338830603 | Sodium.resultn | <       | 137.5        | 0.003823291  |
| ALB.resultn   | >= | 3.03        | ALK.times.uln  | <  | 6.338830603 | Sodium.resultn | >=      | 137.5        | -0.000338031 |
| ALB.resultn   | >= | 3.03        | ALK.times.uln  | >= | 6.338830603 |                | Missing | -0.000399927 | 2500         |

Supplementary Table 2. Covariates examined their influence in the model to Predict 5 year risk decompensation in the derivation cohort

| <b>Variable<sup>a</sup></b>           | <b>Missing within 3 months of baseline</b> | <b>Concordance</b> | <b>Relative Influence</b> | <b>HR (95% CI)</b> |
|---------------------------------------|--------------------------------------------|--------------------|---------------------------|--------------------|
| Total Bilirubin (mg/dL)               | 28                                         | 0.80               | 22.41                     | 1.57 (1.37-1.80)   |
| Albumin (g/dL)                        | 54                                         | 0.74               | 17.61                     | 0.42 (0.31-0.56)   |
| AST (U/L)                             | 21                                         | 0.70               | 7.55                      | 1.18 (1.01-1.37)   |
| Platelets (x 10 <sup>9</sup> /L)      | 61                                         | 0.65               | 8.63                      | 0.70 (0.43-1.13)   |
| SAP x ULN                             | 130                                        | 0.74               | 9.69                      | 1.45 (1.18-1.79)   |
| Sodium (mmol/L)                       | 184                                        | 0.60               | 3.71                      | 0.75 (0.53-1.07)   |
| PSC Duration (per 5 years)            | 0                                          | 0.66               | 7.43                      | 1.48 (1.18-1.86)   |
| Hemoglobin (g/dL)                     | 129                                        | 0.69               | 4.18                      | 0.57 (0.41-0.80)   |
| Age (per 10 years)                    | 0                                          | 0.69               | 8.54                      | 1.53 (1.22-1.91)   |
| CA 19-9 (U/mL)                        | 211                                        | 0.35               | 1.43                      | 0.98 (0.50-1.91)   |
| Leukocytes (x 10 <sup>9</sup> /L)     | 145                                        | 0.55               | 2.51                      | 1.22 (0.88-1.70)   |
| Ursodeoxycholic acid use              | 188                                        | 0.54               | 0.59                      | 0.71 (0.25-1.99)   |
| ALT (U/L)                             | 146                                        | 0.44               | 1.68                      | 0.85 (0.49-1.48)   |
| IBD Duration (per 5 years)            | 0                                          | 0.49               | 1.84                      | 1.00 (0.87-1.16)   |
| BMI (per 5 units, kg/m <sup>2</sup> ) | 208                                        | 0.53               | 0.49                      | 1.02 (0.60-1.74)   |
| IBD Present                           | 56                                         | 0.53               | 0.20                      | 0.60 (0.28-1.31)   |
| Creatinine (mg/dL)                    | 77                                         | 0.55               | 0.62                      | 0.85 (0.60-1.21)   |
| INR                                   | 151                                        | 0.57               | 0.86                      | 1.41 (1.05-1.89)   |
| Female gender                         | 0                                          | 0.54               | 0.03                      | 0.75 (0.38-1.50)   |

<sup>a</sup> All lab values were divided by respective standard deviation

Abbreviations: HR (hazard ratio); CI (confidence interval); SAP x ULN (serum alkaline phosphatase x upper limit of normal); PSC (primary sclerosing cholangitis); IBD (inflammatory bowel disease); BMI (body mass index).

Supplementary Table 3. Exploratory analyses examining PREsTo and Markers of Fibrosis in the Development of Hepatic Decompensation

| <b>Prognostic Variable</b> | <b>Patients Included</b> | <b>C-statistic (95% CI)</b> |
|----------------------------|--------------------------|-----------------------------|
|                            | 213 <sup>a</sup>         |                             |
| MRE Alone                  |                          | 0.93 (0.90-0.96)            |
| MRE + PREsTo               |                          | 0.94 (0.91-0.97)            |
|                            | 51 <sup>b</sup>          |                             |
| Stage of Fibrosis          |                          | 0.88 (0.80-0.94)            |
| Stage of Fibrosis + PREsTo |                          | 0.91 (0.84-0.98)            |

<sup>a</sup> 86 subjects from derivation & 11 from validation cohort. Remaining 116 patients from independent elastography cohort at Mayo Rochester.

<sup>b</sup> 38 subjects from derivation & 13 from validation cohort. Fibrosis stage(s) 0 n=1; I n=12; II n=17; III n=12; IV n=9

Abbreviations: MRE (magnetic resonance elastography); PREsTo (PSC risk estimate tool) CI (confidence interval).

Supplementary Table 4. Sensitivity Analyses Examining PREsTo and the Development of Hepatic Decompensation

| <b>Sensitivity Analyses</b> | <b>Patients Included</b> | <b>C-statistic (95% CI)</b> |
|-----------------------------|--------------------------|-----------------------------|
| Male                        | 506                      | 0.94 (0.90-0.96)            |
| Female                      | 281                      | 0.93 (0.89-0.97)            |
| IBD present                 | 594                      | 0.93 (0.89-0.96)            |
| IBD absent                  | 137                      | 0.95 (0.91-0.99)            |
| PSC duration (years):       |                          |                             |
| <5                          | 604                      | 0.93 (0.90-0.97)            |
| 5-10                        | 101                      | 0.91 (0.85-0.97)            |
| 10-15                       | 43                       | 0.94 (0.87-1.00)            |
| >15                         | 39                       | 0.89 (0.72-1.00)            |
| PSC Symptoms at baseline    | 201                      | 0.94 (0.88-0.98)            |
| No PSC Symptoms at baseline | 287                      | 0.96 (0.93-0.99)            |
| Intrahepatic only           | 192                      | 0.93 (0.84-0.99)            |
| Intrahepatic & Extrahepatic | 381                      | 0.95 (0.92-0.98)            |
| SAP ≤ 1 x ULN               | 140                      | 0.93 (0.85-0.98)            |
| SAP >1 x ULN                | 475                      | 0.91 (0.87-0.94)            |
| Total bilirubin < 2.0 mg/dL | 658                      | 0.94 (0.90-0.96)            |
| Total bilirubin ≥ 2.0 mg/dL | 92                       | 0.90 (0.83-0.95)            |
| Dominant Stricture Present  | 49                       | 0.98 (0.94-1.00)            |
| Dominant Stricture Absent   | 499                      | 0.91 (0.91-0.96)            |

Abbreviations: CI (confidence interval); IBD (inflammatory bowel disease); PSC (primary sclerosing cholangitis); SAP (serum alkaline phosphatase); ULN (upper limit of normal)
